# Supplementary material for: Comparative Transcriptomics of Rat and Axolotl After Spinal Cord Injury Dissects Differences and Similarities in Inflammatory and Matrix Remodeling Gene Expression Patterns
Source: Front Neurosci. 2018 Nov 13;12:808. doi: 10.3389/fnins.2018.00808 (PMC6262295; doi:10.3389/fnins.2018.00808)
Supplement: Supplementary file 1 [file Table_1.XLSX]

## Sheet: RAT DAY1
Rat DAY 1
Genes are sorted by Fold-Change (FC) Injury / Sham. Negative values are downregulated after Injury and positive values are upregulated after Injury. T-test p-value. Benjamini-Hochberg adjusted p-value. Unlog2 is also shown.
SHAM VS SCI DAY 1
DOWNLOADED FROM: https://www.ncbi.nlm.nih.gov/geo/query/acc.cgi?acc=GSE45006
ID	adj.P.Val	P.Value	t	B	logFC	Gene symbol	Gene name	Unlog2
1378252_at	2.26e-06	4.64e-09	-33.7	11.7819	-8.67887	Chodl	chondrolectin	0.00244005
1397983_at	1.98e-06	3.82e-09	-34.6	11.9615	-7.9352			0.0040857
1369210_at	0.000185	7.94e-06	-11.5	4.05271	-7.61175	Scn1a	sodium voltage-gated channel alpha subunit 1	0.00511253
1369627_at	3.95e-05	5.21e-07	-17.1	7.02037	-7.16764	Sv2b	synaptic vesicle glycoprotein 2b	0.00695546
1390477_at	1.25e-05	7.89e-08	-22.5	9.00486	-6.91455			0.00828918
1390951_at	1.04e-05	5.75e-08	-23.5	9.33022	-6.90525			0.00834281
1391331_at	7.65e-09	3.17e-13	-131	17.4246	-6.74771			0.00930544
1370503_s_at	0.000319	1.91e-05	-10.1	3.08169	-6.70913	Epb41l3	erythrocyte membrane protein band 4.1-like 3	0.00955765
1387291_at	0.0115	0.00281	-4.48	-2.44399	-6.66974	Itih3	inter-alpha trypsin inhibitor, heavy chain 3	0.00982219
1391089_at	3.56e-05	4.47e-07	-17.5	7.18335	-6.59515			0.0103434
1370556_at	0.00236	0.000375	-6.34	-0.224128	-6.57959	Vamp1	vesicle-associated membrane protein 1	0.0104555
1376980_at	0.000269	1.42e-05	-10.5	3.41203	-6.55293	Htr2c	5-hydroxytryptamine receptor 2C	0.0106505
1378909_at	0.000649	5.97e-05	-8.48	1.81748	-6.52035			0.0108938
1390976_at	4.3e-05	5.95e-07	-16.8	6.87846	-6.44115	Lynx1	Ly6/neurotoxin 1	0.0115086
1373188_at	7.8e-05	1.71e-06	-14.4	5.73582	-6.43905	Scn4b	sodium voltage-gated channel beta subunit 4	0.0115253
1368524_at	0.000245	1.21e-05	-10.8	3.58522	-6.42943	Kcnc1	potassium voltage-gated channel subfamily C member 1	0.0116024
1390986_at	0.00015	5.61e-06	-12.1	4.43554	-6.37376			0.0120589
1394837_at	0.000377	2.49e-05	-9.69	2.78783	-6.34093			0.0123365
1370214_at	8.03e-05	1.8e-06	-14.3	5.67845	-6.22336	Pvalb	parvalbumin	0.0133839
1394577_at	6.8e-07	3.5e-10	-48.6	13.969	-6.16526	Esrrg	estrogen-related receptor gamma	0.0139339
1387023_at	0.000633	5.73e-05	-8.53	1.86299	-6.06793	Gstm7	glutathione S-transferase, mu 7	0.0149064
1376736_at	3.21e-05	3.71e-07	-18	7.38269	-6.04462			0.0151492
1368853_at	0.00757	0.00167	-4.92	-1.87665	-6.03024	Vsnl1	visinin-like 1	0.0153009
1387226_at	5.54e-05	9.43e-07	-15.7	6.38166	-6.01857	Ina	internexin neuronal intermediate filament protein, alpha	0.0154251
1391547_at	5.28e-05	8.43e-07	-16	6.50341	-6.00046			0.0156201
1386969_at	0.000291	1.63e-05	-10.3	3.25733	-5.99999	Nrn1	neuritin 1	0.0156251
1368759_at	4.12e-05	5.64e-07	-16.9	6.93594	-5.9564	Cacng2	calcium voltage-gated channel auxiliary subunit gamma 2	0.0161044
1368000_at	0.000551	4.65e-05	-8.81	2.09576	-5.9527	C3	complement component 3	0.0161458
1387811_at	0.000877	9.33e-05	-7.91	1.32183	-5.89285	Agt	angiotensinogen	0.0168297
1383072_at	0.000519	4.25e-05	-8.93	2.19665	-5.85891	Pygm	phosphorylase, glycogen, muscle	0.0172303
1370815_at	0.00164	0.000228	-6.87	0.326767	-5.83988	Nefh	neurofilament, heavy polypeptide	0.017459
1368698_at	0.000391	2.65e-05	-9.59	2.71829	-5.81391	Atp2b2	ATPase plasma membrane Ca2+ transporting 2	0.0177762
1372492_at	0.00425	0.000808	-5.58	-1.07313	-5.76727	Cldn10	claudin 10	0.0183603
1393283_at	1.47e-06	1.98e-09	-38	12.5458	-5.76297	Ankrd34b	ankyrin repeat domain 34B	0.0184151
1387022_at	0.000149	5.49e-06	-12.1	4.45934	-5.75249	Aldh1a1	aldehyde dehydrogenase 1 family, member A1	0.0185493
1372208_at	1.1e-05	6.39e-08	-23.1	9.22143	-5.72787	Ppp1r1b	protein phosphatase 1, regulatory (inhibitor) subunit 1B	0.0188686
1393937_at	0.000906	9.78e-05	-7.85	1.27001	-5.72392			0.0189203
1376459_at	0.00035	2.21e-05	-9.86	2.92211	-5.72186	Aak1	AP2 associated kinase 1	0.0189473
1369491_at	5.94e-05	1.12e-06	-15.3	6.19928	-5.66645	Dao	D-amino-acid oxidase	0.0196892
1377828_at	3.26e-06	7.87e-09	-31.2	11.2898	-5.6631	Ano3	anoctamin 3	0.019735
1389637_at	0.000103	2.68e-06	-13.5	5.24618	-5.64702			0.0199561
1377455_at	0.000156	6.08e-06	-12	4.34694	-5.62485			0.0202653
1368854_at	0.00985	0.00231	-4.64	-2.23001	-5.61354	Vsnl1	visinin-like 1	0.0204247
1377456_at	2.02e-05	1.69e-07	-20.1	8.21251	-5.58108			0.0208895
1394941_at	4.64e-05	6.98e-07	-16.4	6.70606	-5.56119			0.0211794
1391721_at	0.000305	1.77e-05	-10.2	3.16893	-5.55199			0.021315
1393743_at	1.8e-06	3.06e-09	-35.7	12.1606	-5.55122	Ppargc1a	PPARG coactivator 1 alpha	0.0213264
1382088_at	0.000242	1.19e-05	-10.8	3.60283	-5.5258	Ryr2	ryanodine receptor 2	0.0217055
1391575_at	0.000137	4.72e-06	-12.4	4.62582	-5.52431	Hapln4	hyaluronan and proteoglycan link protein 4	0.0217278
1383736_at	0.00383	0.000709	-5.7	-0.929636	-5.49149	Elavl2	ELAV like neuron-specific RNA binding protein 2	0.0222279
1383220_at	1.83e-06	3.24e-09	-35.4	12.1086	-5.49108	Kcnip4	potassium voltage-gated channel interacting protein 4	0.0222341
1377773_at	6.02e-05	1.14e-06	-15.3	6.172	-5.45889	Gabrb2	gamma-aminobutyric acid type A receptor beta 2 subunit	0.0227358
1390566_a_at	0.00108	0.000126	-7.55	0.988786	-5.4514	Ckmt1b	creatine kinase, mitochondrial 1B	0.0228541
1390537_at	9.37e-06	4.88e-08	-24.1	9.4964	-5.44049	Slc25a18	solute carrier family 25 member 18	0.0230276
1379661_at	0.00029	1.62e-05	-10.3	3.26404	-5.43248			0.0231558
1379720_at	4.23e-05	5.8e-07	-16.9	6.90598	-5.40634			0.0235792
1369811_at	0.000447	3.33e-05	-9.27	2.46674	-5.40268	Cplx1	complexin 1	0.0236391
1373255_at	2.74e-05	2.85e-07	-18.7	7.66136	-5.39772			0.0237206
1392865_at	0.000117	3.37e-06	-13	4.99663	-5.38953	Fgf9	fibroblast growth factor 9	0.0238556
1376893_at	0.0126	0.00314	-4.39	-2.56792	-5.3826	Nrsn1	neurensin 1	0.0239704
1382054_at	0.000555	4.7e-05	-8.79	2.08347	-5.38227			0.0239759
1395714_at	0.000441	3.25e-05	-9.3	2.49365	-5.36382	LOC102553515	uncharacterized LOC102553515	0.0242845
1390227_at	0.00114	0.000136	-7.46	0.904332	-5.33624	Pcp4l1	Purkinje cell protein 4-like 1	0.0247532
1387543_at	5.05e-06	1.73e-08	-27.9	10.5298	-5.33344	Slc5a7	solute carrier family 5 member 7	0.0248013
1383566_at	1.77e-05	1.37e-07	-20.7	8.43058	-5.30184	LOC100913073	uncharacterized LOC100913073	0.0253506
1370439_a_at	0.000231	1.11e-05	-10.9	3.68154	-5.29542	Kcnc2	potassium voltage-gated channel subfamily C member 2	0.0254637
1371148_s_at	0.00161	0.000222	-6.9	0.361194	-5.2886	Ina	internexin neuronal intermediate filament protein, alpha	0.0255843
1398357_at	0.0028	0.000467	-6.11	-0.46777	-5.27389	Cplx1	complexin 1	0.0258465
1370607_a_at	2.03e-05	1.79e-07	-20	8.15595	-5.25883	Nrg1	neuregulin 1	0.0261176
1370069_at	0.0016	0.000219	-6.92	0.374798	-5.25701	Slc12a5	solute carrier family 12 member 5	0.0261506
1374244_at	3.42e-06	8.46e-09	-30.9	11.2208	-5.23791	LOC501038	Ab2-060	0.0264991
1380228_at	7.29e-06	3.23e-08	-25.5	9.9118	-5.22939	Rimkla	ribosomal modification protein rimK-like family member A	0.0266561
1383726_at	2.76e-06	6.12e-09	-32.4	11.5262	-5.22592	Rgs7bp	regulator of G-protein signaling 7 binding protein	0.0267204
1383768_at	0.00199	0.000299	-6.58	0.029641	-5.21967	Elavl2	ELAV like neuron-specific RNA binding protein 2	0.0268363
1388632_at	0.00357	0.000648	-5.79	-0.83031	-5.2176	Rab6b	RAB6B, member RAS oncogene family	0.0268748
1368972_at	0.000233	1.13e-05	-10.9	3.6667	-5.20821	Ntrk2	neurotrophic receptor tyrosine kinase 2	0.0270503
1370747_at	1.45e-06	1.86e-09	-38.3	12.602	-5.18099	Fgf9	fibroblast growth factor 9	0.0275656
1390493_at	0.00167	0.000233	-6.85	0.302669	-5.17411			0.0276974
1377791_at	0.000479	3.76e-05	-9.1	2.33128	-5.15902	RragB	Ras-related GTP binding B	0.0279885
1370059_at	0.00235	0.000372	-6.35	-0.214989	-5.15446	Nefl	neurofilament, light polypeptide	0.0280772
1387025_at	0.000572	4.91e-05	-8.74	2.0347	-5.15353	Dync1i1	dynein cytoplasmic 1 intermediate chain 1	0.0280952
1389548_at	0.000297	1.68e-05	-10.3	3.22187	-5.09586	Adhfe1	alcohol dehydrogenase, iron containing, 1	0.0292411
1368562_at	0.0018	0.000259	-6.73	0.187831	-5.0784	Sult4a1	sulfotransferase family 4A, member 1	0.0295971
1382132_at	0.000109	2.98e-06	-13.3	5.12911	-5.06528			0.0298675
1370058_at	0.000561	4.78e-05	-8.77	2.065	-5.06	Nefl	neurofilament, light polypeptide	0.0299771
1391809_at	0.000155	5.93e-06	-12	4.37523	-5.05965			0.0299842
1394395_at	0.00317	0.000551	-5.95	-0.649494	-5.04034			0.0303884
1397373_at	9.41e-05	2.33e-06	-13.8	5.39874	-5.0325	Map7d2	MAP7 domain containing 2	0.0305539
1385038_at	0.000618	5.54e-05	-8.58	1.90096	-5.02543			0.030704
1390638_at	0.000659	6.1e-05	-8.45	1.79512	-5.0216	Epha4	Eph receptor A4	0.0307856
1398405_at	4.32e-05	6.02e-07	-16.8	6.86481	-5.01249	2018-09-06	septin 6	0.0309807
1387131_at	0.000405	2.82e-05	-9.5	2.6497	-4.97329	Serpini1	serpin family I member 1	0.0318339
1370680_at	4.42e-06	1.36e-08	-28.9	10.7631	-4.97132	Stau2	staufen double-stranded RNA binding protein 2	0.0318774
1374187_at	0.00178	0.000255	-6.75	0.206147	-4.96627	Adam22	ADAM metallopeptidase domain 22	0.0319892
1396060_at	0.000105	2.8e-06	-13.4	5.19806	-4.96404	Creg2	cellular repressor of E1A-stimulated genes 2	0.0320387
1384247_at	0.00109	0.000128	-7.53	0.972225	-4.94874			0.0323802
1372163_at	0.000594	5.21e-05	-8.66	1.96963	-4.94365			0.0324948
1381206_at	0.000345	2.16e-05	-9.9	2.94836	-4.94026	Plcxd2	phosphatidylinositol-specific phospholipase C, X domain containing 2	0.0325711
1375856_at	0.0012	0.000148	-7.36	0.809673	-4.93707			0.0326434
1369390_a_at	0.000147	5.29e-06	-12.2	4.50052	-4.93084	Dpp6	dipeptidyl peptidase like 6	0.0327845
1387380_at	4.61e-05	6.89e-07	-16.4	6.72029	-4.92793	Slc32a1	solute carrier family 32 member 1	0.0328507
1387383_at	0.000604	5.34e-05	-8.63	1.94291	-4.92654	Gabbr2	gamma-aminobutyric acid type B receptor subunit 2	0.0328824
1388037_at	0.000556	4.72e-05	-8.79	2.07876	-4.92158	Atp2b3	ATPase plasma membrane Ca2+ transporting 3	0.0329957
1378472_at	0.000715	6.9e-05	-8.29	1.65745	-4.91248			0.0332045
1368352_at	0.00335	0.000595	-5.87	-0.735822	-4.89733	Stx1b	syntaxin 1B	0.033555
1391019_at	0.00051	4.14e-05	-8.97	2.2249	-4.89424	Slitrk1	SLIT and NTRK-like family, member 1	0.0336269
1368380_at	0.00136	0.000176	-7.16	0.619278	-4.89382	Vtn	vitronectin	0.0336366
1393622_at	2.54e-07	7.35e-11	-60.7	15.0661	-4.89356	Hecw1	HECT, C2 and WW domain containing E3 ubiquitin protein ligase 1	0.0336427
1375433_at	0.00296	0.000504	-6.04	-0.5522	-4.88166	Disp2	dispatched RND transporter family member 2	0.0339215
1383413_at	1.67e-05	1.25e-07	-21	8.52939	-4.87945	Hhatl	hedgehog acyltransferase-like	0.0339734
1394399_at	0.000268	1.41e-05	-10.6	3.41956	-4.86935			0.034212
1390539_at	6.15e-05	1.18e-06	-15.2	6.14015	-4.85698			0.0345066
1368373_at	0.00375	0.000691	-5.73	-0.900917	-4.85675	Rgs7	regulator of G-protein signaling 7	0.0345122
1395769_at	1.45e-06	1.59e-09	-39.2	12.7396	-4.85384	Acsl6	acyl-CoA synthetase long-chain family member 6	0.0345819
1377008_at	0.000278	1.5e-05	-10.5	3.35387	-4.84545	RGD1566401	similar to GTL2, imprinted maternally expressed untranslated	0.0347835
1369677_at	2.36e-05	2.25e-07	-19.3	7.91276	-4.84074	Cnr1	cannabinoid receptor 1	0.0348974
1368688_at	0.00506	0.00101	-5.37	-1.31838	-4.83961	Ntsr2	neurotensin receptor 2	0.0349247
1368701_at	0.0011	0.000129	-7.52	0.96472	-4.83223	Atp1a3	ATPase Na+/K+ transporting subunit alpha 3	0.0351039
1373886_at	0.000322	1.93e-05	-10.1	3.06903	-4.8235	Reep1	receptor accessory protein 1	0.0353169
1369482_a_at	0.00186	0.000272	-6.68	0.131486	-4.81794	Syn2	synapsin II	0.0354532
1394463_at	2.03e-05	1.8e-07	-20	8.14909	-4.81738			0.035467
1373326_at	0.00216	0.000334	-6.46	-0.094665	-4.80633	Slc4a10	solute carrier family 4 member 10	0.0357396
1373774_at	0.00227	0.000356	-6.39	-0.165093	-4.79527	Rit2	Ras-like without CAAX 2	0.0360146
1376726_at	1.45e-06	1.82e-09	-38.5	12.6226	-4.79098	Car10	carbonic anhydrase 10	0.0361219
1385491_at	0.000547	4.6e-05	-8.82	2.10778	-4.77252	Pnmal2	paraneoplastic Ma antigen family-like 2	0.0365871
1377942_at	1.6e-06	2.37e-09	-37	12.3875	-4.76824			0.0366958
1376434_at	0.00835	0.00189	-4.81	-2.00917	-4.76788			0.036705
1380107_a_at	1.36e-05	8.88e-08	-22.1	8.8833	-4.75858	Nat8l	N-acetyltransferase 8-like	0.0369424
1369371_a_at	0.00655	0.0014	-5.08	-1.67868	-4.75848	Gabbr1	gamma-aminobutyric acid type B receptor subunit 1	0.036945
1380828_at	1.12e-06	9.28e-10	-42.3	13.1921	-4.75768	Gabra1	gamma-aminobutyric acid type A receptor alpha1 subunit	0.0369655
1387235_at	7.61e-05	1.65e-06	-14.5	5.77417	-4.75377	Chga	chromogranin A	0.0370658
1376881_at	0.000259	1.34e-05	-10.6	3.47563	-4.75354			0.0370716
1387968_at	0.00157	0.000214	-6.94	0.401397	-4.75313	Slc6a15	solute carrier family 6 member 15	0.0370822
1381615_at	0.000975	0.000108	-7.73	1.15817	-4.75129			0.0371294
1384346_at	0.000246	1.23e-05	-10.8	3.57177	-4.74011			0.0374184
1397513_at	0.000144	5.14e-06	-12.3	4.53153	-4.72743	Ralyl	RALY RNA binding protein-like	0.0377487
1382089_at	0.00113	0.000135	-7.47	0.911488	-4.72537			0.0378025
1373510_at	0.0011	0.000128	-7.53	0.970659	-4.71832	Vamp1	vesicle-associated membrane protein 1	0.0379877
1371538_at	8.28e-05	1.87e-06	-14.2	5.63836	-4.71454	Brsk1	BR serine/threonine kinase 1	0.0380876
1391653_at	3.6e-06	9.81e-09	-30.3	11.0803	-4.70414	Gabrg2	gamma-aminobutyric acid type A receptor gamma 2 subunit	0.038363
1376158_at	0.000721	7e-05	-8.27	1.64137	-4.69938			0.0384898
1382787_at	3.37e-05	4.04e-07	-17.8	7.29296	-4.68625	Kif5a	kinesin family member 5A	0.0388417
1383340_at	0.000832	8.68e-05	-8	1.4022	-4.68617	Atcay	ATCAY, caytaxin	0.0388438
1393291_at	1.73e-05	1.33e-07	-20.8	8.46464	-4.68515	Ube2ql1	ubiquitin-conjugating enzyme E2Q family-like 1	0.0388714
1370546_at	0.000414	2.94e-05	-9.45	2.60495	-4.68468	Unc13c	unc-13 homolog C	0.038884
1369816_at	0.000203	9.16e-06	-11.3	3.89558	-4.66001	Rab3a	RAB3A, member RAS oncogene family	0.0395546
1377628_at	0.0025	0.000405	-6.26	-0.308836	-4.65995	Napb	NSF attachment protein beta	0.0395564
1381477_at	9.61e-05	2.42e-06	-13.7	5.35778	-4.65581			0.0396699
1379414_at	9.39e-06	4.92e-08	-24	9.48758	-4.65149	Ube2ql1	ubiquitin-conjugating enzyme E2Q family-like 1	0.039789
1389781_at	0.000966	0.000106	-7.75	1.17582	-4.65125	Elmod1	ELMO domain containing 1	0.0397955
1372345_at	0.000176	7.36e-06	-11.6	4.1365	-4.64413			0.0399925
1394894_at	7.01e-06	2.84e-08	-26	10.0409	-4.63522			0.0402401
1385170_at	0.000142	5.06e-06	-12.3	4.54945	-4.63417	Fstl5	follistatin-like 5	0.0402695
1368256_at	0.000568	4.85e-05	-8.75	2.04805	-4.63349	Serpini1	serpin family I member 1	0.0402883
1383612_at	0.000303	1.75e-05	-10.2	3.18069	-4.61228			0.0408851
1393410_at	2.06e-05	1.85e-07	-19.9	8.11757	-4.60496	Cntnap2	contactin associated protein-like 2	0.0410931
1378857_at	0.000278	1.5e-05	-10.5	3.35155	-4.59013	Tceal5	transcription elongation factor A like 5	0.0415176
1392478_at	0.00108	0.000126	-7.55	0.987807	-4.58676	Rab6b	RAB6B, member RAS oncogene family	0.0416147
1370041_at	0.00172	0.000243	-6.8	0.25612	-4.58634	Stmn2	stathmin 2	0.041627
1368515_at	0.000156	6.1e-06	-12	4.34364	-4.57403	Epb41l3	erythrocyte membrane protein band 4.1-like 3	0.0419837
1379445_at	1.12e-06	9.75e-10	-42	13.1511	-4.57281			0.0420191
1390393_at	5.43e-05	8.92e-07	-15.8	6.44222	-4.56994	Cntnap2	contactin associated protein-like 2	0.0421028
1370982_at	0.000674	6.32e-05	-8.4	1.75433	-4.56514	Pygm	phosphorylase, glycogen, muscle	0.0422431
1367571_a_at	0.00869	0.00198	-4.77	-2.06058	-4.56408	Igf2	insulin-like growth factor 2	0.0422741
1398251_a_at	0.00477	0.000936	-5.44	-1.23563	-4.55528	Camk2b	calcium/calmodulin-dependent protein kinase II beta	0.0425329
1385782_at	0.000728	7.11e-05	-8.25	1.62366	-4.55171			0.0426381
1372048_at	0.000623	5.6e-05	-8.56	1.88933	-4.54735	Podxl2	podocalyxin-like 2	0.0427671
1381445_at	6.61e-06	2.53e-08	-26.4	10.1578	-4.54614	Esrrg	estrogen-related receptor gamma	0.0428032
1383552_at	0.00125	0.000156	-7.3	0.751056	-4.54045			0.0429724
1368064_a_at	0.000156	5.98e-06	-12	4.36568	-4.53773	Ddc	dopa decarboxylase	0.0430534
1380400_at	0.00126	0.000158	-7.28	0.73486	-4.5353			0.0431261
1372583_at	0.000471	3.65e-05	-9.14	2.36469	-4.52868	Tmtc1	transmembrane and tetratricopeptide repeat containing 1	0.0433241
1381595_at	9.51e-05	2.39e-06	-13.7	5.37295	-4.51014			0.0438845
1374106_at	0.000552	4.66e-05	-8.81	2.09389	-4.50682			0.0439858
1396092_at	2.53e-05	2.53e-07	-19	7.78897	-4.48765	Nkiras1	NFKB inhibitor interacting Ras-like 1	0.044574
1372848_at	3.24e-05	3.76e-07	-17.9	7.36911	-4.46696	Tmem179	transmembrane protein 179	0.0452181
1395487_at	0.000125	3.91e-06	-12.8	4.83224	-4.46508			0.0452768
1394517_at	4.62e-07	2.08e-10	-52.3	14.3547	-4.46448			0.0452956
1371057_at	3.6e-06	9.5e-09	-30.4	11.1103	-4.45305	Gabra5	gamma-aminobutyric acid type A receptor alpha 5 subunit	0.045656
1396141_at	5.35e-05	8.62e-07	-15.9	6.47818	-4.44988			0.0457566
1383254_at	3.42e-06	8.47e-09	-30.9	11.2196	-4.44973			0.0457613
1378818_at	0.0039	0.000726	-5.68	-0.955176	-4.44587			0.0458837
1368465_at	4.85e-05	7.4e-07	-16.3	6.64363	-4.42268	Asic2	acid sensing ion channel subunit 2	0.0466272
1390358_at	0.000121	3.54e-06	-13	4.94271	-4.4215	Cacna2d3	calcium voltage-gated channel auxiliary subunit alpha2delta 3	0.0466654
1370078_at	6.33e-05	1.23e-06	-15.1	6.09818	-4.41988	Lin7b	lin-7 homolog B, crumbs cell polarity complex component	0.0467178
1396040_at	0.000366	2.38e-05	-9.75	2.84057	-4.41682	Shank1	SH3 and multiple ankyrin repeat domains 1	0.0468172
1378738_at	0.00017	6.99e-06	-11.7	4.19321	-4.40214	Kcnab1	potassium voltage-gated channel subfamily A member regulatory beta subunit 1	0.047296
1371568_at	0.00108	0.000125	-7.55	0.993274	-4.39424	Sncb	synuclein, beta	0.0475555
1385364_at	0.000129	4.18e-06	-12.6	4.75843	-4.39123			0.047655
1374271_at	5.91e-05	1.1e-06	-15.4	6.21484	-4.38739			0.0477819
1368577_at	0.00239	0.000381	-6.32	-0.242332	-4.3871	Gjb6	gap junction protein, beta 6	0.0477916
1394455_at	0.00086	9.07e-05	-7.95	1.35305	-4.38541	Fgf12	fibroblast growth factor 12	0.0478477
1367992_at	0.00613	0.00128	-5.15	-1.58306	-4.37785	Scg5	secretogranin V	0.0480991
1385285_at	0.00196	0.000292	-6.6	0.055846	-4.37163	LOC102556832///Lmo3	LIM domain only protein 3-like///LIM domain only 3	0.0483067
1395054_at	1.36e-05	9.1e-08	-22	8.85832	-4.36961	Usp29	ubiquitin specific peptidase 29	0.0483746
1390912_at	0.000468	3.6e-05	-9.16	2.37871	-4.36953	Pcp4l1	Purkinje cell protein 4-like 1	0.0483772
1382850_at	0.00104	0.000119	-7.62	1.05462	-4.36906	Syn2	synapsin II	0.0483928
1385954_at	0.00117	0.000141	-7.42	0.865889	-4.3642	LOC100125362	hypothetical protein LOC100125362	0.0485563
1394727_at	0.00316	0.000549	-5.95	-0.645422	-4.36383			0.0485688
1367845_at	0.000418	2.99e-05	-9.42	2.58736	-4.36145	Nefm	neurofilament, medium polypeptide	0.048649
1379324_at	0.000505	4.07e-05	-8.99	2.24255	-4.33952			0.0493941
1391472_at	0.000421	3.02e-05	-9.41	2.5744	-4.3343	Dzip1	DAZ interacting zinc finger protein 1	0.0495732
1376945_at	0.0047	0.000919	-5.46	-1.21574	-4.33402			0.0495827
1382621_at	0.00153	0.000206	-6.99	0.442869	-4.31481	Dcaf12	DDB1 and CUL4 associated factor 12	0.0502475
1397241_at	2.43e-05	2.35e-07	-19.2	7.86502	-4.31191	Rimkla	ribosomal modification protein rimK-like family member A	0.0503485
1390209_at	0.0033	0.000581	-5.9	-0.708534	-4.30946	Syngr3	synaptogyrin 3	0.050434
1383195_at	0.000504	4.06e-05	-8.99	2.24643	-4.29743			0.0508564
1373581_at	0.000458	3.47e-05	-9.21	2.42181	-4.29442	Arhgap44	Rho GTPase activating protein 44	0.0509626
1368034_at	0.00388	0.00072	-5.69	-0.946652	-4.29401	Chgb	chromogranin B	0.0509769
1393510_at	0.00481	0.000945	-5.43	-1.24667	-4.29066	Sybu	syntabulin	0.0510954
1368751_at	0.000186	8.05e-06	-11.5	4.03816	-4.28514	Kcns3	potassium voltage-gated channel, modifier subfamily S, member 3	0.0512914
1376184_at	3.03e-06	6.96e-09	-31.8	11.4052	-4.27293	Lynx1	Ly6/neurotoxin 1	0.0517272
1376213_at	6.44e-05	1.26e-06	-15.1	6.06877	-4.26592	Rundc3b	RUN domain containing 3B	0.0519792
1386648_at	0.00102	0.000116	-7.65	1.07945	-4.26579	Dnajc6	DnaJ heat shock protein family (Hsp40) member C6	0.0519841
1383887_at	0.000519	4.25e-05	-8.93	2.19713	-4.25923	Lamp5	lysosomal-associated membrane protein family, member 5	0.052221
1380861_at	7.28e-06	3.09e-08	-25.7	9.95677	-4.25813	Grin2a	glutamate ionotropic receptor NMDA type subunit 2A	0.0522608
1386023_at	0.00613	0.00128	-5.16	-1.58279	-4.25378	Lgi1	leucine-rich, glioma inactivated 1	0.0524186
1373896_at	0.00487	0.000961	-5.42	-1.26577	-4.25091			0.0525231
1389975_at	6.86e-06	2.68e-08	-26.2	10.0999	-4.23901	Elavl4	ELAV like neuron-specific RNA binding protein 4	0.052958
1394252_at	0.00097	0.000107	-7.74	1.16595	-4.22608	Spock3	sparc/osteonectin, cwcv and kazal-like domains proteoglycan (testican) 3	0.0534345
1369332_a_at	3.58e-07	1.41e-10	-55.3	14.6312	-4.22544	Rims1	regulating synaptic membrane exocytosis 1	0.0534582
1375653_at	7.29e-06	3.23e-08	-25.5	9.91253	-4.22544			0.0534582
1382438_at	0.000596	5.24e-05	-8.65	1.96314	-4.22339			0.0535343
1370455_a_at	1.12e-06	1.03e-09	-41.7	13.1043	-4.22158	Olfm3	olfactomedin 3	0.0536016
1385729_at	0.00037	2.41e-05	-9.73	2.82433	-4.22151	Klhdc7a	kelch domain containing 7A	0.0536042
1383066_at	0.000261	1.35e-05	-10.6	3.46829	-4.22117			0.0536168
1393661_at	4.38e-05	6.27e-07	-16.7	6.82214	-4.21105			0.0539944
1376873_at	6.1e-06	2.2e-08	-27	10.2965	-4.20592	Cbln1	cerebellin 1 precursor	0.0541866
1384839_at	0.000371	2.42e-05	-9.73	2.81916	-4.20383			0.0542652
1368114_at	0.00153	0.000206	-6.98	0.439962	-4.20077	Fgf13	fibroblast growth factor 13	0.0543805
1383800_at	0.00173	0.000246	-6.79	0.244186	-4.20077	Fam155a	family with sequence similarity 155, member A	0.0543805
1374192_at	0.00211	0.000323	-6.5	-0.056896	-4.19994	Bsn	bassoon (presynaptic cytomatrix protein)	0.0544118
1378904_at	5.43e-05	8.88e-07	-15.8	6.4467	-4.19904	Slc7a14	solute carrier family 7, member 14	0.0544456
1392295_a_at	4.61e-05	6.88e-07	-16.4	6.72168	-4.19392			0.0546391
1388811_at	0.00182	0.000264	-6.71	0.166029	-4.1929			0.0546778
1384025_at	1.36e-05	9.17e-08	-22	8.85009	-4.19138			0.0547355
1380852_at	0.000156	6.08e-06	-12	4.34746	-4.19109	Ralyl	RALY RNA binding protein-like	0.0547467
1389491_at	3.45e-05	4.26e-07	-17.6	7.23515	-4.18246			0.0550751
1393141_at	2.03e-05	1.76e-07	-20	8.17023	-4.17668			0.0552959
1379092_at	0.000463	3.55e-05	-9.18	2.39714	-4.17576	Kcna2	potassium voltage-gated channel subfamily A member 2	0.0553313
1376183_at	0.00521	0.00104	-5.34	-1.35518	-4.16969	Dpp6	dipeptidyl peptidase like 6	0.0555645
1396612_at	0.000128	4.09e-06	-12.7	4.7828	-4.16858	Ank2	ankyrin 2, neuronal	0.0556075
1383699_at	0.000273	1.46e-05	-10.5	3.38333	-4.16849	Rit2	Ras-like without CAAX 2	0.0556109
1373756_at	1.55e-06	2.2e-09	-37.4	12.4564	-4.16544	LOC100911402///Cend1	cell cycle exit and neuronal differentiation protein 1-like///cell cycle exit and neuronal differentiation 1	0.0557285
1385717_at	0.00344	0.000615	-5.84	-0.77197	-4.16325	Gdap1	ganglioside-induced differentiation-associated-protein 1	0.0558131
1385559_at	0.000219	1.03e-05	-11.1	3.76632	-4.16299	RGD1563441	similar to RIKEN cDNA A030009H04	0.0558234
1385826_at	0.00487	0.000962	-5.42	-1.26666	-4.16159			0.0558776
1374743_at	3.6e-05	4.6e-07	-17.4	7.15414	-4.15997	Patj	PATJ, crumbs cell polarity complex component	0.0559401
1387285_at	9.41e-05	2.33e-06	-13.8	5.39816	-4.14489	Atp2b2	ATPase plasma membrane Ca2+ transporting 2	0.0565279
1378714_at	4.3e-05	5.97e-07	-16.8	6.87424	-4.13102	Mrap2	melanocortin 2 receptor accessory protein 2	0.0570742
1370666_at	3.4e-05	4.14e-07	-17.7	7.26709	-4.1227	Dnm3	dynamin 3	0.0574043
1373891_at	0.0158	0.00415	-4.16	-2.87077	-4.11694	Zcchc12	zinc finger CCHC-type containing 12	0.057634
1397637_at	7.83e-05	1.73e-06	-14.4	5.72233	-4.11631			0.0576589
1386968_at	0.00158	0.000215	-6.94	0.396205	-4.10996	Ppp1r1a	protein phosphatase 1, regulatory (inhibitor) subunit 1A	0.0579136
1368561_at	1.82e-05	1.42e-07	-20.6	8.39389	-4.08476	Abcd2	ATP binding cassette subfamily D member 2	0.0589338
1368958_at	0.000115	3.27e-06	-13.1	5.02871	-4.07825	Pacsin1	protein kinase C and casein kinase substrate in neurons 1	0.0592004
1374859_at	2.42e-05	2.33e-07	-19.2	7.87748	-4.07628			0.0592814
1377095_at	0.00108	0.000125	-7.56	0.999684	-4.07384	Rbfox3	RNA binding protein, fox-1 homolog 3	0.0593815
1389584_at	0.00196	0.000293	-6.6	0.051509	-4.0715			0.0594782
1376203_at	0.00859	0.00195	-4.78	-2.04655	-4.06987	Arhgef4	Rho guanine nucleotide exchange factor 4	0.0595454
1376460_at	0.000324	1.95e-05	-10.1	3.06193	-4.06879	Rbfox3	RNA binding protein, fox-1 homolog 3	0.0595896
1384302_at	0.00285	0.00048	-6.09	-0.496975	-4.06577	Slc6a17	solute carrier family 6 member 17	0.0597146
1394590_at	0.000385	2.59e-05	-9.63	2.74658	-4.05471	Nkiras1	NFKB inhibitor interacting Ras-like 1	0.0601741
1387133_at	0.000306	1.79e-05	-10.2	3.15331	-4.04539	Calb2	calbindin 2	0.0605641
1398415_at	1.04e-05	5.9e-08	-23.4	9.30293	-4.04286	Btrc	beta-transducin repeat containing E3 ubiquitin protein ligase	0.0606704
1377722_at	0.00559	0.00115	-5.26	-1.45972	-4.04004	Atp6v1g2	ATPase H+ transporting V1 subunit G2	0.0607892
1397227_at	0.000475	3.71e-05	-9.12	2.34674	-4.03756	Tmem35	transmembrane protein 35	0.0608936
1369251_a_at	0.00015	5.56e-06	-12.1	4.44584	-4.033	Syn1	synapsin I	0.0610868
1374236_at	1.96e-05	1.56e-07	-20.4	8.29558	-4.02391			0.0614727
1374833_at	0.000357	2.27e-05	-9.82	2.88966	-4.02082			0.0616045
1377374_at	0.00159	0.000217	-6.93	0.383143	-4.02076			0.061607
1394600_at	0.000487	3.86e-05	-9.06	2.30243	-4.00142	Rgs17	regulator of G-protein signaling 17	0.0624383
1396696_at	1.77e-05	1.37e-07	-20.8	8.43478	-3.99016	Gria4	glutamate ionotropic receptor AMPA type subunit 4	0.0629279
1387171_at	0.0131	0.00329	-4.35	-2.61954	-3.98882	Gria2	glutamate ionotropic receptor AMPA type subunit 2	0.0629862
1395023_at	0.000317	1.88e-05	-10.1	3.09809	-3.98665	Rorb	RAR-related orphan receptor B	0.0630809
1380712_at	1.36e-05	8.81e-08	-22.1	8.89223	-3.98159	Ntm	neurotrimin	0.0633026
1377729_at	0.000305	1.77e-05	-10.2	3.16439	-3.98121			0.0633192
1370146_at	8.4e-05	1.94e-06	-14.1	5.6013	-3.97911	Glrb	glycine receptor, beta	0.0634116
1376345_at	0.0198	0.00547	-3.95	-3.17167	-3.9756	Caly	calcyon neuron-specific vesicular protein	0.0635659
1369751_at	6.47e-05	1.28e-06	-15	6.05467	-3.97065	Trhr	thyrotropin releasing hormone receptor	0.0637847
1394446_at	0.000467	3.59e-05	-9.16	2.38295	-3.96936			0.0638417
1383750_at	3.26e-05	3.84e-07	-17.9	7.34584	-3.96828			0.0638892
1389049_at	0.000449	3.36e-05	-9.26	2.45748	-3.96757			0.0639207
1391305_at	4.05e-05	5.43e-07	-17	6.97654	-3.95753			0.0643674
1380017_at	0.00194	0.000288	-6.62	0.069603	-3.95419	Rbms3	RNA binding motif, single stranded interacting protein 3	0.0645164
1368255_at	0.00364	0.000666	-5.77	-0.859116	-3.94775	Ntm	neurotrimin	0.0648052
1368564_at	0.00297	0.000507	-6.03	-0.557793	-3.94751	Slc17a6	solute carrier family 17 member 6	0.0648156
1373991_at	0.00861	0.00196	-4.78	-2.04913	-3.9426	Kcnj16	potassium voltage-gated channel subfamily J member 16	0.0650367
1379754_at	0.000399	2.77e-05	-9.53	2.67274	-3.93969	Stau2	staufen double-stranded RNA binding protein 2	0.0651683
1378292_at	0.000761	7.61e-05	-8.17	1.5481	-3.93967			0.065169
1387065_at	0.000528	4.38e-05	-8.89	2.16293	-3.93542	Plcd4	phospholipase C, delta 4	0.0653612
1377655_at	0.0019	0.00028	-6.65	0.101225	-3.92905	Fgf12	fibroblast growth factor 12	0.0656505
1377267_at	0.000306	1.78e-05	-10.2	3.15839	-3.928	Magee1	MAGE family member E1	0.0656982
1380345_at	0.000132	4.34e-06	-12.6	4.71894	-3.92767	Rimkla	ribosomal modification protein rimK-like family member A	0.0657134
1371400_at	0.000105	2.8e-06	-13.4	5.19678	-3.92532	Thrsp	thyroid hormone responsive	0.0658203
1377346_at	7.65e-05	1.67e-06	-14.4	5.76029	-3.92532	Ccdc149	coiled-coil domain containing 149	0.0658206
1380317_at	0.00181	0.000262	-6.72	0.176023	-3.92522	Cdh10	cadherin 10	0.0658251
1377682_at	0.000301	1.73e-05	-10.2	3.19136	-3.92521			0.0658256
1370115_at	1.36e-05	9.16e-08	-22	8.8516	-3.9184	Slc7a10	solute carrier family 7 member 10	0.0661368
1393847_at	1.33e-05	8.53e-08	-22.2	8.92512	-3.91749	Nkiras1	NFKB inhibitor interacting Ras-like 1	0.0661788
1391154_at	0.000426	3.07e-05	-9.38	2.55536	-3.91411			0.0663338
1368287_at	0.000692	6.61e-05	-8.35	1.70519	-3.91186	Chn1	chimerin 1	0.0664372
1385061_at	0.00359	0.000652	-5.79	-0.836021	-3.91135	Tmem229a	transmembrane protein 229A	0.0664611
1368523_at	3.37e-05	4.05e-07	-17.8	7.29008	-3.90508	Cadps	calcium dependent secretion activator	0.0667505
1375754_at	2.43e-05	2.36e-07	-19.2	7.86394	-3.90263	Impact	impact RWD domain protein	0.0668636
1371855_at	0.000465	3.57e-05	-9.17	2.39047	-3.90143			0.0669197
1397439_at	0.000343	2.14e-05	-9.91	2.95912	-3.89791	Dgke	diacylglycerol kinase epsilon	0.0670832
1382818_at	3.95e-05	5.21e-07	-17.1	7.0194	-3.89495	Fam126b	family with sequence similarity 126, member B	0.0672208
1378391_at	0.0017	0.000238	-6.82	0.27931	-3.89033			0.0674361
1368028_at	0.000593	5.2e-05	-8.66	1.9719	-3.88707	Prph	peripherin	0.067589
1389583_at	0.000324	1.95e-05	-10	3.0584	-3.88461	Slc25a34	solute carrier family 25, member 34	0.0677042
1387073_at	0.00362	0.00066	-5.77	-0.850155	-3.88424	Snap25	synaptosomal-associated protein 25	0.0677216
1394430_at	0.000825	8.56e-05	-8.02	1.41754	-3.8837			0.0677468
1371081_at	0.00076	7.59e-05	-8.17	1.55138	-3.87716	Rapgef4	Rap guanine nucleotide exchange factor 4	0.0680547
1383673_at	0.000305	1.77e-05	-10.2	3.16518	-3.8758	Nap1l2	nucleosome assembly protein 1-like 2	0.0681188
1385560_at	0.000124	3.76e-06	-12.8	4.87537	-3.87391			0.0682082
1373187_at	0.00142	0.000187	-7.09	0.551026	-3.87224	Kif5a	kinesin family member 5A	0.0682872
1398255_at	0.0227	0.00646	-3.82	-3.35227	-3.86899	Slc15a2	solute carrier family 15 member 2	0.0684412
1391036_at	1.36e-05	8.94e-08	-22.1	8.87677	-3.86849	Iqsec3	IQ motif and Sec7 domain 3	0.0684647
1386728_at	0.000253	1.29e-05	-10.7	3.51701	-3.86122			0.0688108
1370595_a_at	5.49e-05	9.24e-07	-15.8	6.4037	-3.85345	Kcnip4	potassium voltage-gated channel interacting protein 4	0.0691824
1369102_at	0.000686	6.52e-05	-8.36	1.72109	-3.84981	Mapk8///Mapk10	mitogen-activated protein kinase 8///mitogen activated protein kinase 10	0.0693574
1376232_at	7.47e-06	3.43e-08	-25.3	9.85225	-3.84703			0.0694911
1369924_at	2.03e-05	1.73e-07	-20.1	8.18937	-3.84279	Sncb	synuclein, beta	0.0696957
1370517_at	0.00292	0.000494	-6.06	-0.529409	-3.84097	Nptx1	neuronal pentraxin 1	0.0697837
1395467_at	0.00058	5.05e-05	-8.7	2.00494	-3.83708	Cpne6	copine 6	0.0699719
1394786_at	0.000652	6.01e-05	-8.47	1.8101	-3.83155	Sorl1	sortilin related receptor 1	0.0702406
1395528_at	0.000309	1.82e-05	-10.2	3.13734	-3.82844			0.070392
1389597_at	0.00729	0.0016	-4.96	-1.82479	-3.82739	Pgbd5	piggyBac transposable element derived 5	0.0704436
1371063_at	5.9e-05	1.1e-06	-15.4	6.21942	-3.82662	Sh3gl2	SH3 domain-containing GRB2-like 2	0.0704811
1378063_at	0.000305	1.78e-05	-10.2	3.16403	-3.82142			0.0707356
1384683_at	1.21e-06	1.17e-09	-41	12.9993	-3.81948			0.0708306
1385044_at	0.0133	0.00334	-4.34	-2.63322	-3.81823	Csrnp3	cysteine and serine rich nuclear protein 3	0.070892
1383811_at	4.36e-05	6.16e-07	-16.7	6.84123	-3.81774	LOC100362814	hypothetical protein LOC100362814	0.0709161
1397569_at	0.245	0.112	-1.82	-6.31036	-3.81719			0.0709432
1373480_at	7.41e-05	1.57e-06	-14.6	5.83047	-3.81597	Hspa12a	heat shock protein family A (Hsp70) member 12A	0.0710031
1379373_at	8.68e-05	2.04e-06	-14	5.54495	-3.81553			0.071025
1371211_a_at	2.89e-07	1.02e-10	-57.9	14.8501	-3.81343	Nrg1	neuregulin 1	0.0711283
1375495_at	0.00127	0.000159	-7.28	0.728314	-3.81185	Cdkl4	cyclin-dependent kinase-like 4	0.0712064
1376946_at	0.000394	2.69e-05	-9.57	2.70167	-3.80336			0.0716264
1398462_at	0.00443	0.000852	-5.53	-1.13209	-3.79812			0.071887
1369651_at	0.00247	0.000398	-6.28	-0.287987	-3.79754	Thy1	Thy-1 cell surface antigen	0.0719162
1391030_at	0.000921	0.0001	-7.83	1.24547	-3.79647	Camta1	calmodulin binding transcription activator 1	0.0719693
1374681_at	5.42e-06	1.92e-08	-27.5	10.4309	-3.78708	Adcyap1r1	adenylate cyclase activating polypeptide 1 receptor type 1	0.0724393
1373783_at	0.00148	0.000196	-7.04	0.495369	-3.78572			0.0725079
1383200_at	0.00013	4.24e-06	-12.6	4.74238	-3.78553	Ccdc81	coiled-coil domain containing 81	0.0725175
1385043_at	0.000441	3.24e-05	-9.31	2.49726	-3.78427	Patj	PATJ, crumbs cell polarity complex component	0.0725806
1385604_at	0.00116	0.00014	-7.42	0.870704	-3.77729			0.0729327
1384203_at	0.00102	0.000116	-7.65	1.07779	-3.77727	Pde1b	phosphodiesterase 1B	0.0729336
1376765_at	0.000124	3.77e-06	-12.8	4.87226	-3.77468	Mro	maestro	0.0730646
1373282_at	0.000502	4.03e-05	-9	2.25383	-3.77223	Slc25a33	solute carrier family 25 member 33	0.0731891
1391758_at	0.000508	4.12e-05	-8.97	2.23046	-3.77159	Ablim1	actin-binding LIM protein 1	0.0732214
1379405_at	0.0018	0.000259	-6.73	0.189587	-3.77019	Arhgap35	Rho GTPase activating protein 35	0.0732926
1386348_at	0.000219	1.03e-05	-11.1	3.76712	-3.76809			0.0733992
1389550_at	0.00164	0.000228	-6.87	0.327324	-3.76807			0.0734002
1371762_at	0.0115	0.0028	-4.48	-2.4431	-3.76201	Rbp4	retinol binding protein 4	0.0737091
1374593_at	4.5e-05	6.63e-07	-16.5	6.76204	-3.7558	Prkce	protein kinase C, epsilon	0.0740272
1391434_at	0.000126	3.98e-06	-12.7	4.81279	-3.75536	Rab3a	RAB3A, member RAS oncogene family	0.0740498
1368120_at	0.000221	1.05e-05	-11	3.74618	-3.75182	Nell1	neural EGFL like 1	0.074232
1396382_at	1.8e-06	3.13e-09	-35.6	12.14	-3.75121	Ncs1	neuronal calcium sensor 1	0.0742634
1390630_at	2.03e-05	1.78e-07	-20	8.162	-3.74677			0.0744921
1377632_at	0.000162	6.47e-06	-11.8	4.27908	-3.74133	Timp4	tissue inhibitor of metalloproteinase 4	0.0747732
1380182_at	0.0023	0.000361	-6.38	-0.182392	-3.74037	Etl4	enhancer trap locus 4	0.0748232
1379863_at	0.00402	0.000753	-5.65	-0.995419	-3.73853	Kcnd2	potassium voltage-gated channel subfamily D member 2	0.0749189
1390341_at	0.00148	0.000198	-7.03	0.487618	-3.73676	Ttbk2	tau tubulin kinase 2	0.0750105
1398538_at	1.96e-05	1.57e-07	-20.3	8.29011	-3.7314	Abhd8	abhydrolase domain containing 8	0.07529
1393263_at	0.00305	0.000525	-6	-0.596677	-3.72815	Snhg11	small nucleolar RNA host gene 11	0.0754596
1389086_at	0.00138	0.000179	-7.14	0.596267	-3.71689	Susd4	sushi domain containing 4	0.0760511
1397663_at	7.25e-05	1.51e-06	-14.7	5.87025	-3.71411	Kcnab2	potassium voltage-gated channel subfamily A regulatory beta subunit 2	0.0761974
1380314_at	0.00321	0.000561	-5.93	-0.669292	-3.70362	LOC100912566///RGD1563072	UPF0500 protein C1orf216 homolog///similar to hypothetical protein FLJ38984	0.0767535
1393482_at	1.86e-06	3.35e-09	-35.3	12.0803	-3.70237	Fam163b	family with sequence similarity 163, member B	0.0768203
1383571_at	2.98e-05	3.34e-07	-18.3	7.49491	-3.69971	Rapgefl1	Rap guanine nucleotide exchange factor like 1	0.0769619
1390146_at	0.000164	6.6e-06	-11.8	4.25704	-3.69948	Tmem150c	transmembrane protein 150C	0.0769744
1372695_at	0.00744	0.00164	-4.94	-1.85314	-3.69081	Fndc5	fibronectin type III domain containing 5	0.0774382
1382775_at	0.000301	1.73e-05	-10.2	3.19281	-3.68816	Ryr2	ryanodine receptor 2	0.0775805
1393933_at	0.00129	0.000163	-7.25	0.704276	-3.68738	Sorl1	sortilin related receptor 1	0.0776225
1387696_a_at	7.03e-07	4.07e-10	-47.6	13.8522	-3.68635	Glra2	glycine receptor, alpha 2	0.077678
1394295_at	0.000439	3.22e-05	-9.32	2.50565	-3.68207	Tmem255a	transmembrane protein 255A	0.0779086
1368182_at	0.00121	0.000149	-7.35	0.79978	-3.67544	Acsl6	acyl-CoA synthetase long-chain family member 6	0.0782677
1368572_a_at	0.000534	4.45e-05	-8.87	2.14408	-3.67377	Grin1	glutamate ionotropic receptor NMDA type subunit 1	0.0783584
1384007_at	0.000524	4.32e-05	-8.91	2.17716	-3.67222	Atl1	atlastin GTPase 1	0.0784425
1387913_at	0.00036	2.32e-05	-9.79	2.86794	-3.67156	Cyp2d4	cytochrome P450, family 2, subfamily d, polypeptide 4	0.0784784
1378861_at	0.000112	3.15e-06	-13.2	5.06805	-3.67128			0.0784937
1390097_at	0.00189	0.000278	-6.66	0.109481	-3.67042	Tspyl4	TSPY-like 4	0.0785405
1394668_at	0.000478	3.75e-05	-9.1	2.33485	-3.66932	Cadm3	cell adhesion molecule 3	0.0786004
1376590_at	0.000441	3.25e-05	-9.31	2.49518	-3.66401			0.0788902
1377445_at	0.00346	0.000622	-5.83	-0.783659	-3.66035			0.0790909
1375484_at	0.00024	1.17e-05	-10.9	3.62685	-3.65642	Cpeb3	cytoplasmic polyadenylation element binding protein 3	0.0793064
1397414_at	4.35e-05	6.11e-07	-16.7	6.84852	-3.65448			0.079413
1385016_at	0.000442	3.27e-05	-9.3	2.48779	-3.65424	RGD1560784	similar to RIKEN cDNA B630019K06	0.0794264
1380872_at	0.000459	3.49e-05	-9.21	2.41568	-3.65379			0.0794512
1375965_at	0.000245	1.21e-05	-10.8	3.58449	-3.6489	Ube2k	ubiquitin-conjugating enzyme E2K	0.0797206
1385598_at	0.000186	8.02e-06	-11.5	4.04185	-3.64868			0.0797328
1394785_at	0.00082	8.48e-05	-8.03	1.42864	-3.6414			0.0801361
1392238_at	0.00111	0.00013	-7.51	0.951617	-3.63893			0.0802737
1373865_at	0.00259	0.000423	-6.22	-0.358175	-3.63757	Snap91	synaptosomal-associated protein 91	0.0803495
1384822_at	0.0152	0.00396	-4.2	-2.82142	-3.63118			0.080706
1368157_at	0.00055	4.63e-05	-8.81	2.09972	-3.63094	Stmn3	stathmin 3	0.0807194
1392003_at	7.53e-05	1.62e-06	-14.5	5.79228	-3.61907			0.0813864
1370053_at	0.00115	0.000137	-7.45	0.8956	-3.61827	Dlgap1	DLG associated protein 1	0.0814315
1394952_at	0.00121	0.000149	-7.35	0.800963	-3.61183	Hapln2	hyaluronan and proteoglycan link protein 2	0.0817958
1391598_at	1.18e-05	7.23e-08	-22.7	9.09569	-3.61052			0.08187
1376933_at	0.000128	4.07e-06	-12.7	4.78779	-3.60689			0.0820763
1387906_a_at	0.000172	7.15e-06	-11.7	4.16852	-3.60589	Gnas	GNAS complex locus	0.082133
1385910_at	0.000281	1.52e-05	-10.4	3.3329	-3.60494			0.0821872
1376302_at	0.000152	5.72e-06	-12.1	4.41476	-3.60295			0.082301
1384755_at	0.000424	3.05e-05	-9.39	2.56257	-3.60037	Prrt2	proline-rich transmembrane protein 2	0.082448
1394821_at	3.63e-08	3.5e-12	-93.4	16.6534	-3.58951			0.0830708
1384065_at	0.00117	0.000142	-7.41	0.857772	-3.58792			0.0831626
1369097_s_at	0.00674	0.00145	-5.04	-1.71953	-3.58566	Gucy1b3	guanylate cyclase 1 soluble subunit beta 3	0.083293
1369993_at	0.00012	3.5e-06	-13	4.95336	-3.58278	LOC100909586///Camk2g	calcium/calmodulin-dependent protein kinase type II subunit gamma-like///calcium/calmodulin-dependent protein kinase II gamma	0.0834593
1387407_at	0.00102	0.000116	-7.65	1.08409	-3.57656	Nap1l3	nucleosome assembly protein 1-like 3	0.0838202
1382527_at	5.71e-05	1.01e-06	-15.6	6.31279	-3.57651	Plcxd2	phosphatidylinositol-specific phospholipase C, X domain containing 2	0.0838231
1378000_at	0.000133	4.4e-06	-12.5	4.70351	-3.57196	Tmem178b	transmembrane protein 178B	0.0840879
1390981_at	0.000385	2.58e-05	-9.63	2.74926	-3.56703	Eny2	ENY2, transcription and export complex 2 subunit	0.0843755
1382422_at	0.0028	0.000469	-6.11	-0.470393	-3.561			0.0847291
1393777_at	0.000136	4.66e-06	-12.4	4.63949	-3.56011			0.0847812
1384289_at	0.000118	3.41e-06	-13	4.9835	-3.56006	Rell2	RELT-like 2	0.0847842
1371692_at	0.00162	0.000224	-6.89	0.348635	-3.55758	Mllt11	myeloid/lymphoid or mixed-lineage leukemia; translocated to, 11	0.0849302
1379492_at	5.8e-05	1.05e-06	-15.5	6.27034	-3.55557			0.0850485
1371013_at	0.0022	0.000342	-6.44	-0.120551	-3.54725	Gria1	glutamate ionotropic receptor AMPA type subunit 1	0.0855402
1374709_at	0.000138	4.8e-06	-12.4	4.60831	-3.547	Hlf	HLF, PAR bZIP transcription factor	0.0855554
1374466_at	0.000278	1.49e-05	-10.5	3.35545	-3.54572			0.085631
1377266_at	1.23e-05	7.73e-08	-22.5	9.02604	-3.54344			0.0857664
1374699_at	0.000131	4.3e-06	-12.6	4.72763	-3.54118	Fam84a	family with sequence similarity 84, member A	0.0859014
1376074_at	3.6e-06	9.61e-09	-30.3	11.1001	-3.53962	Rab11fip4	RAB11 family interacting protein 4	0.0859937
1393783_at	2.97e-05	3.29e-07	-18.3	7.51047	-3.53608	Cntnap2	contactin associated protein-like 2	0.0862056
1368261_at	0.00337	0.000599	-5.87	-0.742143	-3.53013	Nrxn3	neurexin 3	0.0865613
1370355_at	0.0174	0.00466	-4.07	-2.99735	-3.52837	Scd	stearoyl-CoA desaturase	0.0866671
1390512_at	0.000953	0.000105	-7.77	1.1945	-3.52432	Asah2	N-acylsphingosine amidohydrolase 2	0.0869108
1391013_at	0.00151	0.000203	-7	0.460841	-3.52137			0.0870887
1396154_at	0.00166	0.000232	-6.85	0.31212	-3.51527	Kif5c	kinesin family member 5C	0.087458
1373985_at	0.00299	0.00051	-6.03	-0.564614	-3.51468			0.0874935
1387476_at	0.00416	0.000788	-5.6	-1.04535	-3.51141	Kcnd2	potassium voltage-gated channel subfamily D member 2	0.0876922
1386697_at	0.00198	0.000295	-6.59	0.042368	-3.49875	Nxph1	neurexophilin 1	0.0884649
1385924_at	0.000554	4.69e-05	-8.8	2.08551	-3.49645			0.0886063
1389411_at	0.00646	0.00137	-5.09	-1.65969	-3.4935	Frmd5	FERM domain containing 5	0.0887874
1377883_at	0.00372	0.000684	-5.74	-0.889018	-3.48004			0.0896199
1385584_at	0.0111	0.00269	-4.51	-2.39773	-3.46367			0.0906422
1391698_at	0.000111	3.12e-06	-13.2	5.08057	-3.45831	MAST1	microtubule associated serine/threonine kinase 1	0.0909796
1370229_at	0.000553	4.68e-05	-8.8	2.08906	-3.45516	Ndrg4	NDRG family member 4	0.0911787
1381677_at	0.000242	1.19e-05	-10.8	3.6026	-3.45337	Elavl2	ELAV like neuron-specific RNA binding protein 2	0.0912919
1383858_at	0.00933	0.00216	-4.7	-2.15591	-3.45311	Ttyh1	tweety family member 1	0.091308
1386961_at	0.00187	0.000273	-6.68	0.129776	-3.44727	Pfkm	phosphofructokinase, muscle	0.0916786
1391852_at	0.00361	0.000657	-5.78	-0.845268	-3.44643			0.0917318
1374667_at	0.000328	1.99e-05	-10	3.03613	-3.44203	Fhod3	formin homology 2 domain containing 3	0.0920121
1373594_at	0.00177	0.000254	-6.75	0.209205	-3.43132	Dnajc27	DnaJ heat shock protein family (Hsp40) member C27	0.0926981
1391097_at	0.0074	0.00163	-4.94	-1.84646	-3.43126			0.0927017
1373125_at	0.000148	5.46e-06	-12.1	4.46625	-3.42983	Klc2	kinesin light chain 2	0.0927936
1369500_at	5.36e-06	1.88e-08	-27.6	10.4512	-3.42849	Kcnk1	potassium two pore domain channel subfamily K member 1	0.0928802
1369783_a_at	0.0024	0.000384	-6.32	-0.249635	-3.42608	Nrg1	neuregulin 1	0.0930351
1395339_at	0.00046	3.51e-05	-9.2	2.40935	-3.42579	Impact	impact RWD domain protein	0.093054
1379437_at	0.00342	0.000611	-5.85	-0.765193	-3.42457			0.0931326
1373249_at	0.00025	1.26e-05	-10.7	3.54269	-3.4242	Ubl4a	ubiquitin-like 4A	0.0931564
1372118_at	0.00139	0.00018	-7.13	0.589259	-3.41006	Nsg2	neuron specific gene family member 2	0.0940741
1369652_at	0.000428	3.1e-05	-9.37	2.54639	-3.40799	Thy1	Thy-1 cell surface antigen	0.094209
1370991_at	0.000175	7.3e-06	-11.6	4.14567	-3.40589	Nat8f3	N-acetyltransferase 8 (GCN5-related) family member 3	0.0943463
1393434_at	0.000239	1.16e-05	-10.9	3.63065	-3.40363			0.0944942
1377993_at	0.000649	5.96e-05	-8.48	1.8197	-3.3979	Gng13	G protein subunit gamma 13	0.09487
1388802_at	0.00994	0.00233	-4.63	-2.24268	-3.39789	Bex1	brain expressed, X-linked 1	0.0948712
1383257_at	0.000757	7.54e-05	-8.18	1.55935	-3.39642	Rbfox1	RNA binding protein, fox-1 homolog 1	0.0949673
1376463_at	0.00351	0.000634	-5.81	-0.805486	-3.39552			0.0950271
1367956_at	0.00102	0.000115	-7.65	1.08626	-3.3936	Ncdn	neurochondrin	0.0951537
1379817_at	2.03e-05	1.81e-07	-19.9	8.13974	-3.39344	Purg	purine-rich element binding protein G	0.0951638
1383483_at	0.000468	3.6e-05	-9.16	2.37908	-3.38516	Rab9b	RAB9B, member RAS oncogene family	0.0957116
1384158_at	0.000253	1.29e-05	-10.7	3.51655	-3.3821			0.0959151
1378090_at	0.00169	0.000237	-6.83	0.285762	-3.38111			0.0959807
1383706_at	0.000815	8.39e-05	-8.04	1.44	-3.38097	RGD1305733	similar to RIKEN cDNA 2900011O08	0.0959899
1386641_at	0.00192	0.000284	-6.63	0.085991	-3.3728	Hlf	HLF, PAR bZIP transcription factor	0.0965351
1397511_at	0.00192	0.000283	-6.64	0.088804	-3.37201	Ttyh1	tweety family member 1	0.0965883
1368528_at	0.0018	0.000259	-6.73	0.185626	-3.37135	Cd99l2	CD99 molecule-like 2	0.0966322
1392245_at	5.92e-05	1.1e-06	-15.3	6.21043	-3.36891			0.0967959
1388039_a_at	0.00471	0.00092	-5.46	-1.21699	-3.3667	Gabbr1	gamma-aminobutyric acid type B receptor subunit 1	0.0969443
1373545_at	0.00407	0.000766	-5.63	-1.01451	-3.36618	Ttll7	tubulin tyrosine ligase like 7	0.0969794
1391571_at	0.00141	0.000184	-7.11	0.568321	-3.36024			0.0973793
1385734_at	0.000171	7.1e-06	-11.7	4.17682	-3.35846			0.0974995
1379468_at	0.000725	7.07e-05	-8.26	1.62988	-3.35445			0.0977713
1386955_at	0.00107	0.000123	-7.58	1.01321	-3.35342	2018-09-05	septin 5	0.097841
1394425_at	0.000254	1.29e-05	-10.7	3.51398	-3.35073			0.0980232
1369777_a_at	7.37e-05	1.55e-06	-14.6	5.84471	-3.33796	Shank2	SH3 and multiple ankyrin repeat domains 2	0.0988947
1368993_at	0.000364	2.35e-05	-9.77	2.85156	-3.33708	Tenm2	teneurin transmembrane protein 2	0.0989552
1387706_at	0.0166	0.00438	-4.12	-2.93133	-3.33675	Gabrg1	gamma-aminobutyric acid type A receptor gamma 1 subunit	0.0989778
1375575_at	0.000138	4.83e-06	-12.4	4.60042	-3.33634	Camk2b	calcium/calmodulin-dependent protein kinase II beta	0.0990057
1368981_at	0.00247	0.000397	-6.28	-0.28743	-3.33589	Aqp4	aquaporin 4	0.0990371
1374386_at	0.000128	4.06e-06	-12.7	4.79161	-3.33283			0.0992471
1398215_at	0.000623	5.6e-05	-8.56	1.89026	-3.33174			0.099322
1370201_at	0.0201	0.00556	-3.93	-3.18919	-3.32987	Calb1	calbindin 1	0.0994509
1398272_at	8.99e-05	2.17e-06	-13.9	5.47863	-3.32861	B4galnt1	beta-1,4-N-acetyl-galactosaminyl transferase 1	0.0995382
1392820_at	0.000405	2.83e-05	-9.5	2.64591	-3.32552	Fgf1	fibroblast growth factor 1	0.0997516
1385393_at	9.14e-05	2.24e-06	-13.8	5.44285	-3.32271			0.099946
1397924_at	0.000124	3.79e-06	-12.8	4.86704	-3.32084			0.100075
1393980_at	0.000122	3.62e-06	-12.9	4.91812	-3.32005			0.10013
1368292_at	0.00033	2.01e-05	-10	3.02417	-3.31949	Dnm1	dynamin 1	0.100169
1374954_at	0.00116	0.00014	-7.43	0.873164	-3.31687	Hdac11	histone deacetylase 11	0.100351
1372527_at	8.93e-05	2.15e-06	-13.9	5.48916	-3.31625	Rtn2	reticulon 2	0.100394
1369326_at	0.000658	6.08e-05	-8.46	1.79847	-3.31355	Akap6	A-kinase anchoring protein 6	0.100583
1379900_at	0.000811	8.34e-05	-8.05	1.44708	-3.31233	Aldh5a1	aldehyde dehydrogenase 5 family, member A1	0.100667
1398511_at	6.51e-05	1.29e-06	-15	6.04635	-3.31223	Susd2	sushi domain containing 2	0.100674
1378091_at	1.04e-05	5.79e-08	-23.5	9.32311	-3.31073			0.100779
1382651_at	0.000789	8.03e-05	-8.1	1.48857	-3.31053			0.100793
1383363_at	0.0017	0.000239	-6.82	0.2776	-3.30929			0.10088
1379374_at	0.051	0.0171	-3.1	-4.39843	-3.3084	Plppr4	phospholipid phosphatase related 4	0.100942
1368248_at	2.59e-05	2.65e-07	-18.9	7.73872	-3.30685	Cds1	CDP-diacylglycerol synthase 1	0.10105
1391127_at	2.03e-05	1.77e-07	-20	8.16278	-3.29936	Cdc42	cell division cycle 42	0.101576
1394412_at	7.25e-05	1.51e-06	-14.7	5.86881	-3.29933	Ano3	anoctamin 3	0.101578
1374262_at	0.000525	4.34e-05	-8.9	2.17309	-3.29864			0.101628
1393945_at	0.00838	0.0019	-4.81	-2.01423	-3.29807			0.101667
1375984_at	0.000282	1.54e-05	-10.4	3.32216	-3.29659	Zfhx4	zinc finger homeobox 4	0.101772
1395660_at	5.28e-05	8.4e-07	-16	6.50614	-3.29616			0.101802
1384305_at	0.000119	3.46e-06	-13	4.96612	-3.29615	Slc45a1	solute carrier family 45, member 1	0.101803
1375476_at	5.92e-05	1.11e-06	-15.3	6.20893	-3.295	Pygm	phosphorylase, glycogen, muscle	0.101884
1381976_at	0.00102	0.000115	-7.66	1.09078	-3.29067	Kif21a	kinesin family member 21A	0.10219
1376165_at	0.000647	5.92e-05	-8.49	1.82806	-3.28678	Slc24a3	solute carrier family 24 member 3	0.102466
1368411_a_at	0.00248	0.0004	-6.27	-0.296151	-3.28446	Map2	microtubule-associated protein 2	0.102631
1372381_at	0.000816	8.41e-05	-8.04	1.43773	-3.28187			0.102816
1370550_at	0.00339	0.000603	-5.86	-0.749398	-3.28024	Lsamp	limbic system-associated membrane protein	0.102932
1368772_at	0.0147	0.0038	-4.23	-2.77524	-3.27059	Slc4a3	solute carrier family 4 member 3	0.103622
1379562_at	0.00475	0.000931	-5.45	-1.22989	-3.26804			0.103806
1384862_at	0.000159	6.27e-06	-11.9	4.31392	-3.26672			0.103901
1369689_at	0.000102	2.64e-06	-13.5	5.26342	-3.26532	Nsf	N-ethylmaleimide sensitive factor, vesicle fusing ATPase	0.104002
1381350_at	0.0039	0.000727	-5.68	-0.956485	-3.25984			0.104397
1387910_at	0.000339	2.09e-05	-9.94	2.98203	-3.25967	Epb41l1	erythrocyte membrane protein band 4.1-like 1	0.10441
1377394_at	0.000189	8.25e-06	-11.4	4.01167	-3.25171			0.104987
1373398_at	0.000605	5.35e-05	-8.62	1.93967	-3.25086	Trim37	tripartite motif-containing 37	0.105049
1389429_at	0.000403	2.8e-05	-9.51	2.6577	-3.24812			0.105249
1380866_at	0.000544	4.56e-05	-8.84	2.11847	-3.24791	LOC365985	similar to adenylate kinase 5 isoform 1	0.105264
1385749_at	0.00139	0.000181	-7.13	0.587866	-3.24773			0.105278
1376654_at	0.000751	7.46e-05	-8.19	1.57082	-3.24771	Plcxd3	phosphatidylinositol-specific phospholipase C, X domain containing 3	0.105279
1369696_at	0.00163	0.000225	-6.88	0.342181	-3.24649	LOC100909655///RragB	ras-related GTP-binding protein B-like///Ras-related GTP binding B	0.105368
1378601_at	0.000479	3.76e-05	-9.1	2.33193	-3.24615	Mboat2	membrane bound O-acyltransferase domain containing 2	0.105393
1367799_at	0.00452	0.000873	-5.51	-1.15901	-3.24534	Eef1a2	eukaryotic translation elongation factor 1 alpha 2	0.105452
1370938_at	0.000285	1.56e-05	-10.4	3.30685	-3.24107	Pdxp	pyridoxal phosphatase	0.105765
1397536_at	0.0012	0.000146	-7.37	0.822839	-3.23922	Camta1	calmodulin binding transcription activator 1	0.1059
1375690_at	0.0337	0.0104	-3.46	-3.86395	-3.23894			0.105921
1392644_s_at	2.06e-05	1.85e-07	-19.9	8.11971	-3.23885	Tdrp	testis development related protein	0.105927
1388452_at	0.00229	0.00036	-6.38	-0.17771	-3.2365			0.106101
1397060_at	0.000111	3.11e-06	-13.2	5.0836	-3.23624			0.106119
1398525_at	0.000447	3.32e-05	-9.27	2.46963	-3.23621			0.106122
1380763_at	0.00015	5.63e-06	-12.1	4.4329	-3.23057	Strbp	spermatid perinuclear RNA binding protein	0.106537
1393626_at	5.69e-05	9.95e-07	-15.6	6.32352	-3.22933	Sorl1	sortilin related receptor 1	0.106629
1374168_at	0.0185	0.00504	-4.01	-3.08323	-3.22688	Sphkap	SPHK1 interactor, AKAP domain containing	0.10681
1385562_at	0.00169	0.000237	-6.83	0.284611	-3.22582	Jph3	junctophilin 3	0.106889
1385008_at	0.00113	0.000134	-7.48	0.919899	-3.22484			0.106961
1370375_at	0.000128	4.07e-06	-12.7	4.78726	-3.21981	Gls2	glutaminase 2	0.107335
1384043_at	0.000519	4.25e-05	-8.93	2.19465	-3.21954			0.107355
1394594_at	1.36e-05	8.98e-08	-22	8.87232	-3.21763			0.107497
1393443_a_at	0.000302	1.74e-05	-10.2	3.1846	-3.21711	Emc9	ER membrane protein complex subunit 9	0.107536
1389426_at	4.12e-05	5.6e-07	-16.9	6.94267	-3.21654	Ccdc92	coiled-coil domain containing 92	0.107579
1388000_at	0.0012	0.000147	-7.36	0.813354	-3.21191	Slc24a2	solute carrier family 24 member 2	0.107924
1377857_at	1.54e-06	2.13e-09	-37.6	12.4825	-3.20987	Tmem196	transmembrane protein 196	0.108077
1382222_at	0.00115	0.000137	-7.45	0.894986	-3.20972	Tmem163	transmembrane protein 163	0.108088
1391985_at	7.21e-05	1.48e-06	-14.7	5.89022	-3.20863	Nrip3	nuclear receptor interacting protein 3	0.10817
1397367_at	0.000148	5.43e-06	-12.2	4.47239	-3.20794	Adam23	ADAM metallopeptidase domain 23	0.108222
1390033_at	0.000453	3.4e-05	-9.24	2.44325	-3.2061	Cadm3	cell adhesion molecule 3	0.10836
1392909_at	0.00189	0.000277	-6.66	0.111368	-3.20512			0.108433
1396117_at	0.00203	0.000305	-6.56	0.006027	-3.20494	Luzp2	leucine zipper protein 2	0.108447
1377795_at	0.0011	0.000129	-7.52	0.961622	-3.20348			0.108557
1383891_a_at	0.00039	2.63e-05	-9.61	2.72684	-3.2013	Flywch2	FLYWCH family member 2	0.108721
1398433_at	0.00098	0.000109	-7.72	1.14735	-3.20104			0.108741
1374103_at	0.000339	2.1e-05	-9.94	2.97906	-3.19821	Ncs1	neuronal calcium sensor 1	0.108954
1377615_at	0.000933	0.000102	-7.8	1.22286	-3.19748	Tmem130	transmembrane protein 130	0.109009
1375729_at	0.000246	1.23e-05	-10.8	3.5685	-3.19224	Epha4	Eph receptor A4	0.109406
1383249_at	0.00143	0.000188	-7.09	0.54193	-3.19006			0.109571
1392867_at	0.000138	4.78e-06	-12.4	4.61161	-3.18964			0.109603
1392607_at	0.000132	4.31e-06	-12.6	4.72459	-3.18152	Epb41	erythrocyte membrane protein band 4.1	0.110221
1392823_at	0.000347	2.17e-05	-9.89	2.93915	-3.18074	Snhg11	small nucleolar RNA host gene 11	0.110281
1388743_at	0.000106	2.86e-06	-13.4	5.17414	-3.1788			0.11043
1398297_at	0.00124	0.000154	-7.31	0.761898	-3.1778	Mapk12	mitogen-activated protein kinase 12	0.110506
1395827_at	4.12e-05	5.59e-07	-16.9	6.94489	-3.17634			0.110618
1394129_at	0.00137	0.000177	-7.15	0.61052	-3.17489			0.110729
1378323_at	5.56e-05	9.51e-07	-15.7	6.37214	-3.17375	Nol4	nucleolar protein 4	0.110817
1368156_at	4.9e-05	7.51e-07	-16.2	6.62741	-3.16938	Camkk1	calcium/calmodulin-dependent protein kinase kinase 1	0.111153
1368145_at	0.000483	3.82e-05	-9.08	2.3131	-3.16405	Pcp4	Purkinje cell protein 4	0.111564
1374635_at	4.38e-05	6.29e-07	-16.7	6.81728	-3.15852	Adam23	ADAM metallopeptidase domain 23	0.111993
1379052_at	3.14e-05	3.6e-07	-18.1	7.41614	-3.15811			0.112025
1379903_at	0.000483	3.81e-05	-9.08	2.31622	-3.15483			0.11228
1372276_at	0.000201	9e-06	-11.3	3.91498	-3.1512	Agpat3	1-acylglycerol-3-phosphate O-acyltransferase 3	0.112563
1391546_at	4.92e-06	1.61e-08	-28.2	10.5993	-3.14912			0.112725
1383530_at	0.000356	2.27e-05	-9.82	2.8922	-3.14679	Nrip3	nuclear receptor interacting protein 3	0.112907
1368646_at	0.000748	7.41e-05	-8.2	1.57878	-3.14304	Mapk9	mitogen-activated protein kinase 9	0.113201
1397654_at	0.000134	4.49e-06	-12.5	4.68008	-3.14258			0.113238
1384471_at	0.000458	3.47e-05	-9.21	2.42232	-3.14089			0.11337
1397614_at	0.0079	0.00176	-4.87	-1.93516	-3.13512	Gabra2	gamma-aminobutyric acid type A receptor alpha2 subunit	0.113825
1378018_at	0.000106	2.87e-06	-13.4	5.17218	-3.13508			0.113828
1390196_at	0.000748	7.42e-05	-8.2	1.57601	-3.1297	Syn1	synapsin I	0.114253
1373839_at	0.00225	0.000353	-6.4	-0.155179	-3.12721	Igdcc4	immunoglobulin superfamily, DCC subclass, member 4	0.11445
1371942_at	0.0018	0.00026	-6.73	0.184164	-3.12439	Gstt3	glutathione S-transferase, theta 3	0.114674
1374724_at	0.0012	0.000147	-7.37	0.819979	-3.12377	Mapk4	mitogen-activated protein kinase 4	0.114723
1384921_at	0.000372	2.44e-05	-9.72	2.8136	-3.12155	Ctxn2	cortexin 2	0.1149
1393614_at	0.0102	0.00242	-4.6	-2.28282	-3.12073	Necab3	N-terminal EF-hand calcium binding protein 3	0.114965
1368476_at	0.000721	6.98e-05	-8.28	1.64406	-3.12054	Nr3c2	nuclear receptor subfamily 3, group C, member 2	0.114981
1375182_at	0.00151	0.000203	-7	0.459181	-3.12039			0.114992
1395286_at	0.000924	0.0001	-7.82	1.24005	-3.11851	Fam43b	family with sequence similarity 43, member B	0.115143
1393607_at	0.00398	0.000744	-5.66	-0.982819	-3.11839			0.115152
1389463_at	0.00227	0.000356	-6.39	-0.166701	-3.11657	Prkar1b	protein kinase cAMP-dependent type 1 regulatory subunit beta	0.115297
1389166_at	0.000674	6.34e-05	-8.4	1.75118	-3.11485	Cib2	calcium and integrin binding family member 2	0.115435
1388189_at	0.00311	0.000538	-5.97	-0.62373	-3.11194	Grm3	glutamate metabotropic receptor 3	0.115668
1383453_at	0.0018	0.000259	-6.73	0.188536	-3.111	Olfml1	olfactomedin-like 1	0.115743
1392501_at	0.00107	0.000123	-7.58	1.01363	-3.10918			0.115889
1392315_at	3.86e-05	5.06e-07	-17.2	7.052	-3.10838			0.115954
1398229_at	0.0041	0.000774	-5.62	-1.02592	-3.10811			0.115975
1395519_at	0.00113	0.000135	-7.47	0.912487	-3.10633	Mturn	maturin, neural progenitor differentiation regulator homolog (Xenopus)	0.116119
1379452_at	0.000971	0.000108	-7.74	1.16416	-3.10414	Gas2	growth arrest-specific 2	0.116295
1383694_at	0.000111	3.07e-06	-13.2	5.0987	-3.10275	Rnf208	ring finger protein 208	0.116407
1394280_at	0.00251	0.000406	-6.26	-0.312717	-3.10145	Rgs17	regulator of G-protein signaling 17	0.116512
1373333_at	0.00138	0.000179	-7.14	0.59781	-3.10092	MGC109340	similar to Microsomal signal peptidase 23 kDa subunit (SPase 22 kDa subunit) (SPC22/23)	0.116554
1374039_at	0.00141	0.000184	-7.11	0.566719	-3.10076	Car14	carbonic anhydrase 14	0.116568
1379708_at	0.0103	0.00244	-4.6	-2.28973	-3.09952			0.116668
1374015_at	0.0094	0.00218	-4.69	-2.16524	-3.09776			0.116811
1395249_at	0.000504	4.06e-05	-8.99	2.24654	-3.09369	Snhg11	small nucleolar RNA host gene 11	0.11714
1383318_at	0.000256	1.31e-05	-10.7	3.50102	-3.09351			0.117155
1384236_at	9.14e-05	2.23e-06	-13.9	5.44454	-3.09343	Sptssb	serine palmitoyltransferase, small subunit B	0.117162
1367700_at	0.032	0.00977	-3.51	-3.79869	-3.09316	Fmod	fibromodulin	0.117183
1391071_at	0.000119	3.44e-06	-13	4.97255	-3.08752			0.117643
1373436_at	0.000449	3.35e-05	-9.26	2.46151	-3.08714	RGD1306739	similar to RIKEN cDNA 1700040L02	0.117673
1370205_at	0.00701	0.00152	-5	-1.77172	-3.0798	Slco1c1	solute carrier organic anion transporter family, member 1c1	0.118274
1370518_a_at	0.000128	4.06e-06	-12.7	4.79071	-3.07702	Stxbp1	syntaxin binding protein 1	0.118502
1387685_at	0.000141	4.95e-06	-12.3	4.57303	-3.07567	Ncs1	neuronal calcium sensor 1	0.118612
1383268_at	0.000147	5.36e-06	-12.2	4.48693	-3.07387	Vstm2a	V-set and transmembrane domain containing 2A	0.11876
1373312_at	0.000148	5.38e-06	-12.2	4.48115	-3.07262	Pnkd	paroxysmal nonkinesigenic dyskinesia	0.118864
1380833_at	0.000596	5.24e-05	-8.65	1.96371	-3.07179	Gpld1	glycosylphosphatidylinositol specific phospholipase D1	0.118932
1375765_at	0.00029	1.62e-05	-10.3	3.26384	-3.06994	Hpcal4	hippocalcin-like 4	0.119085
1368276_at	0.00174	0.000248	-6.78	0.237386	-3.06713	Syp	synaptophysin	0.119317
1370545_at	0.0011	0.000129	-7.53	0.96594	-3.06708	Kcna1	potassium voltage-gated channel subfamily A member 1	0.119321
1369904_at	0.000125	3.87e-06	-12.8	4.84416	-3.06574	Gabrb1	gamma-aminobutyric acid type A receptor beta 1 subunit	0.119432
1379460_at	0.000393	2.68e-05	-9.58	2.70605	-3.0652	Sgip1	SH3-domain GRB2-like (endophilin) interacting protein 1	0.119476
1398430_at	0.00157	0.000214	-6.94	0.401241	-3.06487	Myo6	myosin VI	0.119504
1375074_at	7.99e-05	1.78e-06	-14.3	5.6906	-3.06195	Tbkbp1	TBK1 binding protein 1	0.119746
1379026_at	1.08e-05	6.15e-08	-23.3	9.26039	-3.05807	Rhbdl3	rhomboid like 3	0.120069
1388598_at	0.00156	0.000212	-6.95	0.410613	-3.05671	LOC691995	hypothetical protein LOC691995	0.120182
1390552_at	1.98e-05	1.62e-07	-20.3	8.25993	-3.05548	Magi1	membrane associated guanylate kinase, WW and PDZ domain containing 1	0.120284
1385622_at	7.25e-05	1.5e-06	-14.7	5.87545	-3.05481	Col25a1	collagen, type XXV, alpha 1	0.12034
1377421_at	0.00311	0.000538	-5.97	-0.62275	-3.05			0.120742
1390873_at	0.000573	4.95e-05	-8.73	2.02703	-3.04877	Btbd11	BTB domain containing 11	0.120845
1387128_at	0.000594	5.21e-05	-8.66	1.96877	-3.0467	Adcy3	adenylate cyclase 3	0.121019
1391879_at	0.000295	1.67e-05	-10.3	3.23277	-3.04408			0.121239
1398578_at	0.00641	0.00136	-5.1	-1.64825	-3.04295	Ttyh1	tweety family member 1	0.121333
1391246_at	4.38e-05	6.31e-07	-16.6	6.81388	-3.04284			0.121343
1386123_at	2.5e-05	2.48e-07	-19.1	7.81002	-3.0418			0.12143
1370535_at	0.000286	1.57e-05	-10.4	3.29737	-3.04004	Myt1l	myelin transcription factor 1-like	0.121579
1381132_at	0.000885	9.44e-05	-7.9	1.30863	-3.0353	Fam19a2	family with sequence similarity 19 member A2, C-C motif chemokine like	0.121979
1387529_a_at	0.00371	0.000682	-5.74	-0.885509	-3.03413	Tagln3	transgelin 3	0.122078
1383824_at	0.000126	3.96e-06	-12.7	4.81868	-3.03354	Ldb2	LIM domain binding 2	0.122127
1370833_at	0.00108	0.000125	-7.56	0.999008	-3.02933	Pex5l	peroxisomal biogenesis factor 5-like	0.122484
1395447_at	0.00149	0.000199	-7.03	0.482531	-3.02751	Ermn	ermin	0.122639
1375305_at	0.000454	3.42e-05	-9.23	2.4375	-3.02503	Snhg11	small nucleolar RNA host gene 11	0.12285
1384225_at	0.000387	2.6e-05	-9.62	2.73959	-3.02454	Dab1	DAB1, reelin adaptor protein	0.122892
1367923_at	0.00195	0.000289	-6.61	0.064019	-3.02271	Acsbg1	acyl-CoA synthetase bubblegum family member 1	0.123048
1379597_at	5.8e-05	1.04e-06	-15.5	6.27109	-3.02244	Rsrc1	arginine and serine rich coiled-coil 1	0.123071
1377412_at	0.000747	7.39e-05	-8.2	1.58065	-3.02179	Chic1	cysteine-rich hydrophobic domain 1	0.123126
1379719_at	0.00336	0.000596	-5.87	-0.736945	-3.01896			0.123368
1369297_at	0.000337	2.07e-05	-9.96	2.99124	-3.01656	Ppp2r2c	protein phosphatase 2, regulatory subunit B, gamma	0.123573
1370042_at	0.000286	1.57e-05	-10.4	3.30062	-3.01316	Stmn2	stathmin 2	0.123865
1369690_at	5.54e-05	9.44e-07	-15.7	6.38048	-3.01174	Nsf	N-ethylmaleimide sensitive factor, vesicle fusing ATPase	0.123987
1368381_at	0.000111	3.1e-06	-13.2	5.08576	-3.00989	Crtac1	cartilage acidic protein 1	0.124146
1370320_at	0.00149	0.000199	-7.02	0.477657	-3.00734	Pbld2///Pbld1	phenazine biosynthesis-like protein domain containing 2///phenazine biosynthesis-like protein domain containing 1	0.124366
1370438_at	0.000222	1.06e-05	-11	3.73688	-3.00308	Nos1ap	nitric oxide synthase 1 adaptor protein	0.124734
1397630_at	0.0025	0.000405	-6.26	-0.307499	-3.0019	Hecw2	HECT, C2 and WW domain containing E3 ubiquitin protein ligase 2	0.124836
1394997_at	0.000131	4.26e-06	-12.6	4.73795	-2.99982	Ttbk2	tau tubulin kinase 2	0.125016
1379801_at	6.43e-05	1.25e-06	-15.1	6.07352	-2.99903			0.125084
1376283_at	0.000127	4.01e-06	-12.7	4.80581	-2.99741			0.125224
1390763_at	0.000343	2.13e-05	-9.92	2.96332	-2.99701			0.12526
1382226_at	0.000775	7.83e-05	-8.13	1.51753	-2.99397			0.125523
1396950_at	0.046	0.0151	-3.19	-4.26638	-2.99055			0.125821
1383174_at	1.02e-05	5.49e-08	-23.7	9.37767	-2.98907			0.125951
1381296_at	0.00508	0.00101	-5.37	-1.32401	-2.98759			0.12608
1383418_at	0.000298	1.7e-05	-10.3	3.21187	-2.98605	Adam11	ADAM metallopeptidase domain 11	0.126214
1390864_at	7.35e-05	1.54e-06	-14.6	5.85363	-2.98576			0.12624
1378316_at	0.000225	1.07e-05	-11	3.71989	-2.98397	Tdrkh	tudor and KH domain containing	0.126396
1373642_at	0.00205	0.000309	-6.54	-0.010073	-2.98263	Paqr6	progestin and adipoQ receptor family member 6	0.126514
1379318_at	0.000471	3.66e-05	-9.14	2.36237	-2.97846	Tdrp	testis development related protein	0.12688
1375968_at	0.00179	0.000257	-6.74	0.19424	-2.97761	Ctnna2	catenin alpha 2	0.126956
1390369_at	0.00167	0.000233	-6.85	0.307077	-2.97544			0.127146
1398483_at	0.000925	0.000101	-7.82	1.23769	-2.97313	Rgs17	regulator of G-protein signaling 17	0.12735
1387923_at	0.00373	0.000686	-5.74	-0.893142	-2.97193	Rnf112	ring finger protein 112	0.127456
1372528_at	0.000237	1.15e-05	-10.9	3.64025	-2.96326	Nsf	N-ethylmaleimide sensitive factor, vesicle fusing ATPase	0.128224
1370996_at	0.000665	6.19e-05	-8.43	1.77756	-2.96111	Rasgrf1	RAS protein-specific guanine nucleotide-releasing factor 1	0.128415
1373790_at	0.000647	5.91e-05	-8.49	1.82914	-2.96106	Car14	carbonic anhydrase 14	0.128419
1392045_at	0.00719	0.00157	-4.97	-1.80761	-2.9597	Slc35g2	solute carrier family 35, member G2	0.128541
1369213_at	0.000403	2.81e-05	-9.51	2.65456	-2.9595	L1cam	L1 cell adhesion molecule	0.128559
1384866_at	0.00185	0.00027	-6.69	0.141713	-2.95642	Entpd3	ectonucleoside triphosphate diphosphohydrolase 3	0.128834
1398480_at	1.03e-06	7.45e-10	-43.7	13.373	-2.95574	Lrrc24	leucine rich repeat containing 24	0.128895
1388689_at	0.00392	0.000732	-5.67	-0.964477	-2.95509	Acyp2	acylphosphatase 2	0.128952
1375569_at	0.000382	2.54e-05	-9.66	2.76876	-2.95472	Ccdc92	coiled-coil domain containing 92	0.128986
1373336_at	0.000327	1.98e-05	-10	3.04411	-2.95404	Gprc5b	G protein-coupled receptor, class C, group 5, member B	0.129046
1379505_at	6.45e-06	2.4e-08	-26.6	10.2067	-2.95373	Lix1	limb and CNS expressed 1	0.129074
1393350_at	0.00217	0.000336	-6.46	-0.100623	-2.95204			0.129226
1373580_at	0.000447	3.32e-05	-9.27	2.47084	-2.9517	Miga1	mitoguardin 1	0.129255
1395430_at	0.00242	0.000387	-6.31	-0.259374	-2.94833			0.129558
1383234_at	0.000269	1.42e-05	-10.5	3.41277	-2.94798			0.12959
1376120_at	0.00264	0.000434	-6.19	-0.385024	-2.94749	Fam69b	family with sequence similarity 69, member B	0.129633
1388146_at	0.00246	0.000395	-6.29	-0.280367	-2.94536	LOC100912222	uncharacterized LOC100912222	0.129825
1385643_at	5.02e-06	1.69e-08	-28	10.552	-2.94511			0.129847
1397173_at	8.99e-05	2.17e-06	-13.9	5.47579	-2.93501			0.13076
1397333_at	0.000483	3.82e-05	-9.08	2.31368	-2.9313	Samd12	sterile alpha motif domain containing 12	0.131097
1384469_at	0.000102	2.63e-06	-13.5	5.26745	-2.93094	Abca5	ATP binding cassette subfamily A member 5	0.131129
1377125_at	0.00267	0.00044	-6.18	-0.399341	-2.92594	Dnajc6	DnaJ heat shock protein family (Hsp40) member C6	0.131584
1390397_at	0.000956	0.000105	-7.77	1.19086	-2.9258	Syndig1	synapse differentiation inducing 1	0.131597
1382137_at	0.000819	8.46e-05	-8.03	1.43039	-2.92242	Abhd3	abhydrolase domain containing 3	0.131906
1393820_at	0.000287	1.59e-05	-10.4	3.28887	-2.91878			0.132239
1383390_at	0.00317	0.000552	-5.95	-0.651942	-2.91763	Amer2	APC membrane recruitment protein 2	0.132344
1368704_a_at	0.00292	0.000495	-6.06	-0.53004	-2.91742	Cspg5	chondroitin sulfate proteoglycan 5	0.132364
1398383_at	0.000216	1.01e-05	-11.1	3.78953	-2.91479	Cyb561	cytochrome b-561	0.132605
1374062_x_at	0.00268	0.000442	-6.17	-0.406335	-2.91377	Mapre3	microtubule-associated protein, RP/EB family, member 3	0.132699
1384069_at	0.00133	0.000169	-7.21	0.661094	-2.91191	Lrp11	LDL receptor related protein 11	0.13287
1387204_at	0.00353	0.000638	-5.81	-0.811717	-2.91146	Negr1	neuronal growth regulator 1	0.132911
1377786_at	0.0031	0.000534	-5.98	-0.616123	-2.91116			0.132939
1392982_at	0.000176	7.4e-06	-11.6	4.13108	-2.91079			0.132973
1372626_at	0.000327	1.98e-05	-10	3.04207	-2.91046	Tpd52l1	tumor protein D52-like 1	0.133004
1372443_at	0.00138	0.000178	-7.15	0.604099	-2.91027	Lrp11	LDL receptor related protein 11	0.133022
1388133_at	0.0014	0.000183	-7.12	0.57384	-2.91004	Csdc2	cold shock domain containing C2	0.133042
1390401_at	9.51e-05	2.39e-06	-13.7	5.37334	-2.90978	Slc25a27	solute carrier family 25, member 27	0.133067
1372874_at	0.000187	8.11e-06	-11.5	4.0306	-2.9097	Akt3	AKT serine/threonine kinase 3	0.133074
1391605_at	0.00978	0.00229	-4.65	-2.21916	-2.90964			0.133079
1377751_at	0.00052	4.27e-05	-8.93	2.19093	-2.90827	Reps2	RALBP1 associated Eps domain containing 2	0.133205
1370182_at	0.000289	1.6e-05	-10.4	3.27847	-2.90801	Ptprn2	protein tyrosine phosphatase, receptor type N2	0.13323
1392463_at	4.38e-05	6.25e-07	-16.7	6.82416	-2.90166	Map7d2	MAP7 domain containing 2	0.133818
1385033_at	0.000643	5.87e-05	-8.5	1.83796	-2.89965			0.134005
1374131_at	0.00359	0.000653	-5.78	-0.837362	-2.89789			0.134168
1383084_at	0.00457	0.000886	-5.49	-1.17521	-2.89705	Ttll7	tubulin tyrosine ligase like 7	0.134246
1373196_at	0.000778	7.87e-05	-8.12	1.51097	-2.89597	Micu3	mitochondrial calcium uptake family, member 3	0.134346
1387693_a_at	0.00995	0.00234	-4.63	-2.24333	-2.89476	Slc6a9	solute carrier family 6 member 9	0.134459
1368584_a_at	0.000454	3.43e-05	-9.23	2.43455	-2.89208	Cplx2	complexin 2	0.134709
1376844_at	2.98e-05	3.33e-07	-18.3	7.49747	-2.88881	Ap3b2	adaptor-related protein complex 3, beta 2 subunit	0.135015
1385981_at	0.0104	0.00246	-4.59	-2.29894	-2.88586	Plppr4	phospholipid phosphatase related 4	0.135291
1380570_at	3.95e-05	5.22e-07	-17.1	7.01711	-2.88401			0.135464
1389231_at	0.000396	2.73e-05	-9.56	2.689	-2.88309	Sgip1	SH3-domain GRB2-like (endophilin) interacting protein 1	0.135551
1393359_at	0.000166	6.71e-06	-11.8	4.23954	-2.88119	Ap3b2	adaptor-related protein complex 3, beta 2 subunit	0.135729
1391687_at	0.000242	1.19e-05	-10.8	3.60705	-2.88077	Dtna	dystrobrevin, alpha	0.135769
1386865_at	0.00133	0.000169	-7.21	0.661629	-2.88066	Sparcl1	SPARC like 1	0.135779
1386149_at	0.00118	0.000143	-7.4	0.843893	-2.87556			0.136261
1374825_at	0.000108	2.97e-06	-13.3	5.13226	-2.87518	Sez6l2	seizure related 6 homolog like 2	0.136296
1393575_at	0.0073	0.0016	-4.96	-1.82788	-2.87386	LOC102553298	uncharacterized LOC102553298	0.136422
1392778_at	0.0026	0.000426	-6.21	-0.363564	-2.87336	LOC102556259	uncharacterized LOC102556259	0.136468
1374367_at	0.0224	0.00635	-3.83	-3.33446	-2.87053	LOC100910415///Grxcr1	glutaredoxin domain-containing cysteine-rich protein 1-like///glutaredoxin and cysteine rich domain containing 1	0.136737
1384004_at	0.000572	4.91e-05	-8.74	2.03477	-2.87028	Gpr158	G protein-coupled receptor 158	0.13676
1389814_at	0.0263	0.00771	-3.68	-3.54368	-2.86524	Huwe1	HECT, UBA and WWE domain containing 1, E3 ubiquitin protein ligase	0.137239
1395703_at	0.00237	0.000377	-6.33	-0.229563	-2.85488			0.138228
1378860_at	0.0106	0.00253	-4.57	-2.33093	-2.85025	Dpy19l3	dpy-19-like 3 (C. elegans)	0.138672
1383759_at	0.00015	5.59e-06	-12.1	4.43914	-2.84969	Agtpbp1	ATP/GTP binding protein 1	0.138726
1375861_at	0.00121	0.000149	-7.35	0.800713	-2.84817	Nap1l5	nucleosome assembly protein 1-like 5	0.138873
1377308_a_at	0.00614	0.00129	-5.15	-1.58825	-2.84769			0.138918
1370625_at	0.00105	0.00012	-7.61	1.04628	-2.84602	Faim2	Fas apoptotic inhibitory molecule 2	0.139079
1393063_at	0.00123	0.000153	-7.32	0.773878	-2.84549	Eif5a2	eukaryotic translation initiation factor 5A2	0.13913
1374910_at	0.000178	7.51e-06	-11.6	4.11464	-2.84464			0.139212
1370853_at	0.00188	0.000276	-6.66	0.115805	-2.8437	Camk2n1	calcium/calmodulin-dependent protein kinase II inhibitor 1	0.139303
1370431_at	0.00107	0.000123	-7.57	1.01171	-2.84346	Syn2	synapsin II	0.139327
1378021_at	0.00185	0.000269	-6.69	0.144387	-2.84106			0.139558
1373414_at	0.000822	8.51e-05	-8.03	1.42471	-2.84021	Tmem59l	transmembrane protein 59-like	0.13964
1373696_at	0.00195	0.000289	-6.61	0.065871	-2.83863	LOC100910558	uncharacterized LOC100910558	0.139794
1377333_at	0.000576	4.99e-05	-8.71	2.017	-2.83813			0.139842
1380089_at	0.00024	1.18e-05	-10.8	3.61873	-2.83744			0.139909
1389310_at	0.0082	0.00185	-4.83	-1.98427	-2.83621	Slc2a13	solute carrier family 2 member 13	0.140028
1391308_at	0.000437	3.2e-05	-9.33	2.51073	-2.82992			0.14064
1390052_at	0.000665	6.19e-05	-8.43	1.77781	-2.82698	LOC100912140	uncharacterized LOC100912140	0.140927
1380003_at	0.00103	0.000117	-7.63	1.06747	-2.82494	Rgs17	regulator of G-protein signaling 17	0.141127
1395726_at	0.000142	5e-06	-12.3	4.56232	-2.82256			0.141359
1389416_at	0.000698	6.68e-05	-8.33	1.69393	-2.82252	RGD1560398	RGD1560398	0.141363
1392299_at	0.0228	0.00651	-3.81	-3.36142	-2.82043	Nos1ap	nitric oxide synthase 1 adaptor protein	0.141568
1390777_at	0.00684	0.00148	-5.03	-1.73928	-2.81981	Sc5d	sterol-C5-desaturase	0.14163
1377325_a_at	0.000617	5.53e-05	-8.58	1.90432	-2.81868	Pgm2l1	phosphoglucomutase 2-like 1	0.14174
1368964_at	0.000949	0.000104	-7.78	1.20169	-2.81842	Lrrn3	leucine rich repeat neuronal 3	0.141766
1394986_at	0.000449	3.36e-05	-9.26	2.45826	-2.81822	Fam120b	family with sequence similarity 120B	0.141785
1390674_at	0.000244	1.2e-05	-10.8	3.59352	-2.81248	Kcnab2	potassium voltage-gated channel subfamily A regulatory beta subunit 2	0.142351
1378396_at	8.72e-06	4.4e-08	-24.4	9.60227	-2.81217			0.142381
1375875_at	0.000611	5.43e-05	-8.6	1.92279	-2.81134	Kif5a	kinesin family member 5A	0.142463
1390896_at	0.00608	0.00127	-5.16	-1.57125	-2.80966	Anks1b	ankyrin repeat and sterile alpha motif domain containing 1B	0.14263
1369903_at	0.00382	0.000706	-5.71	-0.924753	-2.80473	Gabrb3	gamma-aminobutyric acid type A receptor beta 3 subunit	0.143117
1380884_at	0.00556	0.00114	-5.26	-1.4532	-2.80402			0.143188
1373614_at	0.000103	2.69e-06	-13.5	5.24045	-2.80131	Chat	choline O-acetyltransferase	0.143457
1397554_at	0.000747	7.39e-05	-8.2	1.5805	-2.79562			0.144024
1369772_at	0.000953	0.000105	-7.77	1.19562	-2.7938	Slc6a9	solute carrier family 6 member 9	0.144206
1386794_at	9.34e-05	2.3e-06	-13.8	5.41355	-2.79374	Fbxw7	F-box and WD repeat domain containing 7	0.144211
1391117_at	4.76e-05	7.24e-07	-16.3	6.66613	-2.79309	Pnmal2	paraneoplastic Ma antigen family-like 2	0.144276
1368656_at	0.00281	0.00047	-6.11	-0.473582	-2.79247	Scg3	secretogranin III	0.144339
1368170_at	0.00133	0.000169	-7.21	0.665035	-2.78975	Slc6a1	solute carrier family 6 member 1	0.144611
1369079_at	0.000145	5.23e-06	-12.2	4.51284	-2.78598	Nxph1	neurexophilin 1	0.144989
1368696_at	9.42e-05	2.34e-06	-13.8	5.39537	-2.78585	Fxyd7	FXYD domain-containing ion transport regulator 7	0.145002
1387926_at	0.00535	0.00108	-5.31	-1.3975	-2.78239	Sc5d	sterol-C5-desaturase	0.145351
1367864_at	0.000356	2.26e-05	-9.83	2.89628	-2.78177	Pfkm	phosphofructokinase, muscle	0.145413
1383642_at	1.67e-05	1.26e-07	-21	8.52047	-2.78083			0.145508
1395335_at	0.000749	7.44e-05	-8.2	1.57383	-2.77827			0.145767
1398245_at	2.9e-05	3.18e-07	-18.4	7.54824	-2.77725	Sncg	synuclein, gamma	0.14587
1385547_at	0.00162	0.000225	-6.89	0.34552	-2.77568	Ermn	ermin	0.146028
1385365_at	0.0122	0.003	-4.43	-2.51614	-2.77491	Extl1	exostosin-like glycosyltransferase 1	0.146106
1391075_at	0.000149	5.51e-06	-12.1	4.45523	-2.77308	Rgs17	regulator of G-protein signaling 17	0.146291
1397944_at	0.00173	0.000245	-6.79	0.249613	-2.77246			0.146355
1368044_at	0.00322	0.000564	-5.93	-0.675147	-2.7711	Scg2	secretogranin II	0.146493
1367949_at	0.0646	0.0227	-2.9	-4.69391	-2.76927	Penk	proenkephalin	0.146679
1379545_at	4.38e-05	6.3e-07	-16.7	6.8172	-2.76925			0.146681
1386911_at	0.000266	1.4e-05	-10.6	3.43017	-2.76811	Atp1a2	ATPase Na+/K+ transporting subunit alpha 2	0.146796
1388546_at	0.000198	8.87e-06	-11.3	3.93084	-2.76672	Ablim1	actin-binding LIM protein 1	0.146938
1391885_at	0.000816	8.43e-05	-8.04	1.4352	-2.76575			0.147037
1377472_at	0.000103	2.67e-06	-13.5	5.25165	-2.76563	Extl1	exostosin-like glycosyltransferase 1	0.147049
1372884_at	0.000527	4.37e-05	-8.89	2.16516	-2.76498	Large1	LARGE xylosyl- and glucuronyltransferase 1	0.147116
1389687_at	0.00913	0.0021	-4.72	-2.12741	-2.76432			0.147182
1387437_at	0.00121	0.00015	-7.35	0.79628	-2.76261	Fbxo2	F-box protein 2	0.147358
1379338_at	0.000763	7.65e-05	-8.16	1.54342	-2.7563	Pgm2l1	phosphoglucomutase 2-like 1	0.148003
1397246_at	0.00342	0.000612	-5.85	-0.765377	-2.75426	Ntrk2	neurotrophic receptor tyrosine kinase 2	0.148213
1391092_at	6.71e-05	1.35e-06	-14.9	5.99694	-2.75395	Glrb	glycine receptor, beta	0.148244
1375120_at	0.00436	0.000836	-5.55	-1.11105	-2.75343	Id4	inhibitor of DNA binding 4, HLH protein	0.148298
1397555_at	0.000515	4.21e-05	-8.94	2.20668	-2.75342			0.148299
1386618_at	0.000313	1.84e-05	-10.1	3.12157	-2.75306	Flywch1	FLYWCH-type zinc finger 1	0.148336
1378002_at	0.0021	0.000321	-6.5	-0.051743	-2.75275	Hspa4l	heat shock protein 4-like	0.148368
1389430_at	0.00138	0.000178	-7.15	0.604977	-2.75225	Hsd17b7	hydroxysteroid (17-beta) dehydrogenase 7	0.14842
1394961_at	0.000136	4.64e-06	-12.4	4.64533	-2.75126			0.148521
1382924_at	7.53e-05	1.62e-06	-14.5	5.793	-2.7511	Pank1	pantothenate kinase 1	0.148538
1379451_at	0.00063	5.69e-05	-8.54	1.8713	-2.74939	Ssbp2	single-stranded DNA binding protein 2	0.148714
1373773_at	0.0024	0.000383	-6.32	-0.246051	-2.74638	Gpm6a	glycoprotein m6a	0.149024
1390513_at	8.29e-05	1.9e-06	-14.2	5.62398	-2.73809	Rhof	ras homolog family member F, filopodia associated	0.149883
1394820_at	0.0052	0.00104	-5.34	-1.35378	-2.73698	Clpb	ClpB homolog, mitochondrial AAA ATPase chaperonin	0.149998
1372790_at	0.000741	7.3e-05	-8.22	1.59457	-2.73625	Mdh1	malate dehydrogenase 1	0.150074
1368440_at	0.00265	0.000435	-6.19	-0.389071	-2.73122	Slc3a1	solute carrier family 3 member 1	0.150598
1374883_at	0.00173	0.000246	-6.79	0.245324	-2.73048	Mtmr7	myotubularin related protein 7	0.150676
1392582_at	0.00685	0.00148	-5.03	-1.74073	-2.72823			0.150911
1393262_at	0.00031	1.83e-05	-10.1	3.1311	-2.72787	Smad9	SMAD family member 9	0.150948
1376208_at	0.00101	0.000114	-7.67	1.09606	-2.72776			0.150961
1389712_at	0.00324	0.000568	-5.92	-0.684499	-2.7237	Ebf3///Ebf1	early B-cell factor 3///early B-cell factor 1	0.151386
1385799_at	0.000929	0.000101	-7.81	1.23046	-2.72289	Nxph1	neurexophilin 1	0.151471
1384501_at	0.000453	3.4e-05	-9.24	2.44269	-2.72184	Hecw2	HECT, C2 and WW domain containing E3 ubiquitin protein ligase 2	0.151581
1389725_at	0.000831	8.67e-05	-8	1.40427	-2.72086	Tm7sf2	transmembrane 7 superfamily member 2	0.151684
1370705_at	0.0461	0.0152	-3.19	-4.26793	-2.72062	Zfp597	zinc finger protein 597	0.151709
1370557_a_at	0.00235	0.000373	-6.35	-0.218209	-2.71698	Kcnc2	potassium voltage-gated channel subfamily C member 2	0.152092
1383994_at	0.00371	0.000683	-5.74	-0.887004	-2.71596	Syt3	synaptotagmin 3	0.1522
1395121_at	0.00291	0.000493	-6.06	-0.525897	-2.715			0.152301
1376747_at	0.000774	7.8e-05	-8.14	1.52192	-2.71459			0.152344
1398625_at	0.000777	7.86e-05	-8.13	1.51316	-2.713	Zcchc18	zinc finger, CCHC domain containing 18	0.152513
1393064_at	0.000168	6.88e-06	-11.7	4.21098	-2.70925			0.15291
1378796_at	0.00336	0.000597	-5.87	-0.739522	-2.70464	Omg	oligodendrocyte-myelin glycoprotein	0.153399
1382382_at	0.00115	0.000138	-7.44	0.889	-2.70113	Ermn	ermin	0.153772
1385173_at	0.00239	0.00038	-6.33	-0.239332	-2.70021	Ebf3///Ebf1	early B-cell factor 3///early B-cell factor 1	0.15387
1377051_at	0.0129	0.00323	-4.36	-2.5996	-2.69876	LOC100362572	Mpv17 transgene, kidney disease mutant-like (predicted)-like	0.154026
1382083_at	0.0856	0.0316	-2.67	-5.04212	-2.69042	Coch	cochlin	0.154918
1369798_at	0.0108	0.00258	-4.55	-2.35102	-2.68603	Atp1b2	ATPase Na+/K+ transporting subunit beta 2	0.15539
1377018_at	0.0336	0.0104	-3.46	-3.86153	-2.68501	Pamr1	peptidase domain containing associated with muscle regeneration 1	0.155501
1387363_at	0.00161	0.000222	-6.9	0.359176	-2.68449	Folh1	folate hydrolase 1	0.155556
1392769_at	0.000607	5.38e-05	-8.62	1.93442	-2.68397	Arxes2	adipocyte-related X-chromosome expressed sequence 2	0.155613
1377001_at	0.00779	0.00173	-4.89	-1.91515	-2.68005	Nrcam	neuronal cell adhesion molecule	0.156036
1389311_at	0.00011	3.06e-06	-13.2	5.10156	-2.67811			0.156246
1383069_at	0.000827	8.6e-05	-8.01	1.41305	-2.67766	Rbms3	RNA binding motif, single stranded interacting protein 3	0.156294
1385901_at	0.00297	0.000507	-6.03	-0.557307	-2.67714	Ptdss2	phosphatidylserine synthase 2	0.156351
1396135_at	0.00987	0.00231	-4.64	-2.23204	-2.6753			0.156551
1370150_a_at	6.86e-05	1.38e-06	-14.9	5.96772	-2.67504	Thrsp	thyroid hormone responsive	0.156578
1368378_at	0.00213	0.000328	-6.48	-0.074072	-2.67477	Aldh1l1	aldehyde dehydrogenase 1 family, member L1	0.156608
1394097_at	0.00151	0.000203	-7	0.460312	-2.67451	Kcnip1	potassium voltage-gated channel interacting protein 1	0.156637
1395814_at	0.00113	0.000134	-7.47	0.916491	-2.67372			0.156722
1376042_at	0.00153	0.000205	-6.99	0.447057	-2.6737	LOC100910723///Tsr2	pre-rRNA-processing protein TSR2 homolog///TSR2, 20S rRNA accumulation, homolog (S. cerevisiae)	0.156725
1397505_at	0.000802	8.2e-05	-8.07	1.46563	-2.67267	Kif1a	kinesin family member 1A	0.156836
1392148_at	0.000991	0.000111	-7.7	1.13059	-2.67265			0.156838
1370016_at	0.00522	0.00104	-5.34	-1.35736	-2.67053	Nell2	neural EGFL like 2	0.157069
1392358_at	0.000262	1.37e-05	-10.6	3.45486	-2.67015			0.15711
1383169_at	0.00639	0.00135	-5.11	-1.64348	-2.66968			0.157161
1372637_at	0.000234	1.13e-05	-10.9	3.6627	-2.66935	Tro	trophinin	0.157198
1383444_at	0.00431	0.000822	-5.56	-1.09282	-2.66873	Slc24a2	solute carrier family 24 member 2	0.157265
1376027_at	0.000259	1.34e-05	-10.6	3.47719	-2.66792	Bend6	BEN domain containing 6	0.157353
1374315_at	0.00216	0.000334	-6.46	-0.095265	-2.66711			0.157442
1369408_at	0.00188	0.000275	-6.67	0.12011	-2.66587	Brinp1	BMP/retinoic acid inducible neural specific 1	0.157577
1385505_at	0.000119	3.44e-06	-13	4.97271	-2.6624			0.157957
1395144_at	0.000988	0.00011	-7.71	1.13526	-2.66189	Ajap1	adherens junction associated protein 1	0.158013
1372158_at	0.000207	9.46e-06	-11.2	3.85996	-2.66183	Macrod1	MACRO domain containing 1	0.158019
1391285_at	0.00743	0.00164	-4.94	-1.85252	-2.65907	Zfyve9	zinc finger FYVE-type containing 9	0.158322
1393066_at	0.000353	2.24e-05	-9.84	2.90705	-2.65895	Sec22c	SEC22 homolog C, vesicle trafficking protein	0.158334
1388968_at	7.29e-06	3.15e-08	-25.6	9.93653	-2.65865	Mpped1	metallophosphoesterase domain containing 1	0.158367
1376661_at	0.00673	0.00145	-5.05	-1.71681	-2.65724	Kazn	kazrin, periplakin interacting protein	0.158523
1386056_at	0.00361	0.000656	-5.78	-0.843522	-2.65662			0.158591
1370116_at	0.000484	3.83e-05	-9.07	2.31078	-2.65653	2018-09-03	septin 3	0.158601
1378065_at	0.00428	0.000815	-5.57	-1.08259	-2.65645			0.158609
1381183_at	0.000308	1.81e-05	-10.2	3.14313	-2.65449			0.158825
1389111_at	0.00209	0.000319	-6.51	-0.042553	-2.65262	Sc5d	sterol-C5-desaturase	0.159031
1385719_at	0.000123	3.7e-06	-12.9	4.89208	-2.65257			0.159037
1387397_at	7.17e-05	1.47e-06	-14.7	5.89842	-2.65189	Aqp4	aquaporin 4	0.159111
1368801_at	0.0357	0.0111	-3.41	-3.93728	-2.6506	Cxxc4	CXXC finger protein 4	0.159254
1376320_at	7.18e-06	3e-08	-25.8	9.98733	-2.64979			0.159343
1387467_at	0.00893	0.00205	-4.74	-2.09799	-2.64924	Kcnj10	potassium voltage-gated channel subfamily J member 10	0.159404
1381995_at	0.000385	2.59e-05	-9.63	2.74621	-2.64442	Celf4	CUGBP, Elav-like family member 4	0.159937
1378105_at	0.000722	7.02e-05	-8.27	1.63912	-2.64435			0.159945
1379814_at	0.00311	0.000537	-5.98	-0.620731	-2.64211	Ccdc141	coiled-coil domain containing 141	0.160194
1373144_at	0.00127	0.000159	-7.28	0.727714	-2.63942	Rusc1	RUN and SH3 domain containing 1	0.160493
1398707_at	0.00336	0.000597	-5.87	-0.738633	-2.63855	LOC102555246	uncharacterized LOC102555246	0.16059
1383637_at	0.00153	0.000205	-6.99	0.449223	-2.63784	Klf12	Kruppel-like factor 12	0.160668
1393253_at	0.000305	1.77e-05	-10.2	3.16687	-2.63449	Zfp365	zinc finger protein 365	0.161042
1385256_at	0.000123	3.67e-06	-12.9	4.90232	-2.62773			0.161799
1389774_at	0.000136	4.6e-06	-12.5	4.65413	-2.62678	Zfp612	zinc finger protein 612	0.161905
1389803_at	0.000744	7.35e-05	-8.21	1.58798	-2.62656			0.161929
1381736_at	0.00017	6.99e-06	-11.7	4.19395	-2.62519			0.162084
1382479_at	0.00204	0.000308	-6.55	-0.004171	-2.62431	Lrrc4c	leucine rich repeat containing 4C	0.162182
1371570_at	1.98e-05	1.65e-07	-20.2	8.24118	-2.62288			0.162343
1393665_at	0.0366	0.0115	-3.39	-3.96925	-2.62052	Grm5	glutamate metabotropic receptor 5	0.162609
1394609_at	0.000481	3.8e-05	-9.09	2.32103	-2.61991	Ablim2	actin binding LIM protein family, member 2	0.162677
1395518_at	1.15e-05	7.02e-08	-22.8	9.1258	-2.61931	Ppargc1a	PPARG coactivator 1 alpha	0.162746
1382706_at	7.17e-05	1.47e-06	-14.7	5.8978	-2.61808			0.162885
1370555_at	0.000585	5.11e-05	-8.68	1.99224	-2.61799	Nalcn	sodium leak channel, non-selective	0.162895
1396023_at	0.000125	3.86e-06	-12.8	4.84704	-2.61756			0.162943
1389735_at	0.00145	0.000192	-7.06	0.520225	-2.61379	Rps6ka6	ribosomal protein S6 kinase A6	0.16337
1369133_a_at	0.000392	2.68e-05	-9.58	2.70746	-2.61043	Kcnc3	potassium voltage-gated channel subfamily C member 3	0.163751
1373659_at	0.000241	1.18e-05	-10.8	3.61427	-2.60998	Smim5	small integral membrane protein 5	0.163801
1390821_at	0.000156	5.99e-06	-12	4.36434	-2.60871	Pcdha11///Pcdhac2///Pcdhac1///Pcdha9///Pcdha7///Pcdha6///Pcdha5///Pcdha2///Pcdha1///Pcdha8///Pcdha3///Pcdha12///Pcdha10///Pcdha13///Pcdha4	protocadherin alpha 11///protocadherin alpha subfamily C, 2///protocadherin alpha subfamily C, 1///protocadherin alpha 9///protocadherin alpha 7///protocadherin alpha 6///protocadherin alpha 5///protocadherin alpha 2///protocadherin alpha 1///protocadherin alpha 8///protocadherin alpha 3///protocadherin alpha 12///protocadherin alpha 10///protocadherin alpha 13///protocadherin alpha 4	0.163946
1390740_at	0.0317	0.00964	-3.52	-3.78449	-2.60867			0.16395
1390793_at	0.00025	1.26e-05	-10.7	3.54165	-2.60855	Ttc33	tetratricopeptide repeat domain 33	0.163964
1382824_at	0.00292	0.000494	-6.06	-0.529636	-2.60625	Sgsm1	small G protein signaling modulator 1	0.164225
1375905_at	0.00965	0.00224	-4.67	-2.19966	-2.60307	Ttyh1	tweety family member 1	0.164588
1377929_at	0.000166	6.74e-06	-11.8	4.23372	-2.59655			0.165334
1387464_at	0.0165	0.00438	-4.12	-2.92943	-2.59595	Glra1	glycine receptor, alpha 1	0.165402
1392072_at	0.000886	9.46e-05	-7.9	1.30726	-2.59581			0.165418
1395029_at	3.33e-05	3.94e-07	-17.8	7.31976	-2.59538			0.165468
1369404_a_at	0.00135	0.000172	-7.19	0.643912	-2.59532	Nrxn1	neurexin 1	0.165475
1377457_a_at	0.000128	4.07e-06	-12.7	4.78901	-2.59425	Sorl1	sortilin related receptor 1	0.165597
1377868_at	0.000454	3.43e-05	-9.23	2.43449	-2.59395	Gprasp2	G protein-coupled receptor associated sorting protein 2	0.165632
1368307_at	0.000502	4.04e-05	-9	2.25263	-2.59361	Ggt7	gamma-glutamyltransferase 7	0.16567
1370519_at	6.15e-05	1.18e-06	-15.2	6.13608	-2.59092	Stxbp1	syntaxin binding protein 1	0.16598
1383356_at	2.53e-05	2.52e-07	-19	7.79175	-2.58903	Enho	energy homeostasis associated	0.166198
1378809_at	0.0083	0.00187	-4.82	-2.00143	-2.58834			0.166276
1397632_at	8.72e-06	4.39e-08	-24.4	9.60328	-2.587	Slitrk1	SLIT and NTRK-like family, member 1	0.166432
1389511_s_at	0.00028	1.52e-05	-10.4	3.3355	-2.5867			0.166466
1370089_at	0.000108	2.96e-06	-13.3	5.13629	-2.58591	Ppargc1a	PPARG coactivator 1 alpha	0.166558
1372755_at	1.11e-05	6.61e-08	-23	9.18781	-2.58315	Mal2	mal, T-cell differentiation protein 2	0.166876
1373618_at	0.0134	0.00339	-4.32	-2.65112	-2.58281	Crebl2	cAMP responsive element binding protein-like 2	0.166916
1380024_at	0.000187	8.13e-06	-11.5	4.02757	-2.58219	Mapk9	mitogen-activated protein kinase 9	0.166987
1381699_at	0.000668	6.24e-05	-8.42	1.76868	-2.58103			0.167121
1396672_at	0.000281	1.53e-05	-10.4	3.3288	-2.57926	LOC498507	T-cell receptor alpha chain V region PY14-like	0.167327
1383059_a_at	0.00024	1.18e-05	-10.8	3.61984	-2.57513	Gkap1	G kinase anchoring protein 1	0.167807
1372479_at	0.00346	0.000622	-5.83	-0.783451	-2.57496	Slc4a4	solute carrier family 4 member 4	0.167826
1381644_at	5.54e-05	9.44e-07	-15.7	6.38049	-2.57076			0.168315
1369085_s_at	0.000772	7.77e-05	-8.14	1.52598	-2.56644	LOC688682///Snurf///Snrpn	similar to small nuclear ribonucleoparticle-associated protein///SNRPN upstream reading frame///small nuclear ribonucleoprotein polypeptide N	0.168821
1375621_at	0.000303	1.75e-05	-10.2	3.17866	-2.56429	Sfxn5	sideroflexin 5	0.169072
1385321_at	6.51e-05	1.29e-06	-15	6.04148	-2.56156	Prmt8	protein arginine methyltransferase 8	0.169393
1370540_at	0.00141	0.000185	-7.1	0.561436	-2.56109	Nr1d2	nuclear receptor subfamily 1, group D, member 2	0.169447
1390645_at	0.000972	0.000108	-7.74	1.16309	-2.55957			0.169626
1381697_at	0.000299	1.71e-05	-10.3	3.20708	-2.55823	LOC100912950	uncharacterized LOC100912950	0.169784
1398458_at	0.000742	7.32e-05	-8.22	1.59222	-2.55618	Wnk2	WNK lysine deficient protein kinase 2	0.170025
1367774_at	0.000209	9.62e-06	-11.2	3.84111	-2.5556	Gsta1	glutathione S-transferase alpha 1	0.170093
1398330_at	0.000112	3.17e-06	-13.2	5.06417	-2.55468	Stxbp1	syntaxin binding protein 1	0.170202
1371947_at	0.000807	8.28e-05	-8.06	1.4552	-2.55352	Ndn	necdin, MAGE family member	0.170339
1382467_at	0.000591	5.18e-05	-8.67	1.9768	-2.55348	Bex1///Bex2	brain expressed, X-linked 1///brain expressed X-linked 2	0.170343
1392887_at	0.000194	8.56e-06	-11.4	3.97084	-2.55193			0.170526
1385235_at	0.000635	5.76e-05	-8.53	1.85856	-2.54956	Rbfox1	RNA binding protein, fox-1 homolog 1	0.170808
1373159_at	0.00131	0.000166	-7.23	0.681111	-2.54813			0.170976
1372195_at	0.000902	9.73e-05	-7.86	1.27561	-2.54663	Tnnc2	troponin C2, fast skeletal type	0.171154
1383580_at	0.000229	1.1e-05	-10.9	3.69237	-2.54604	Rnf157	ring finger protein 157	0.171224
1385909_at	0.00153	0.000206	-6.99	0.444024	-2.54448			0.17141
1368882_at	0.00575	0.00119	-5.22	-1.49849	-2.544	St6galnac3	ST6 N-acetylgalactosaminide alpha-2,6-sialyltransferase 3	0.171466
1368691_at	0.0013	0.000164	-7.24	0.695174	-2.53915	Gria3	glutamate ionotropic receptor AMPA type subunit 3	0.172044
1383185_at	0.000623	5.6e-05	-8.56	1.88973	-2.5382			0.172158
1392210_at	0.000283	1.55e-05	-10.4	3.31675	-2.53658	RGD1307443	similar to mKIAA0319 protein	0.17235
1374370_at	0.000103	2.71e-06	-13.5	5.23581	-2.53562			0.172466
1372864_at	0.000217	1.02e-05	-11.1	3.78096	-2.53471			0.172574
1397542_at	0.000317	1.89e-05	-10.1	3.09744	-2.53162			0.172944
1376787_at	1.4e-07	1.81e-11	-74	15.8895	-2.53081	Lingo2	leucine rich repeat and Ig domain containing 2	0.173041
1383511_at	0.00119	0.000146	-7.38	0.827149	-2.53077			0.173046
1376808_at	0.00123	0.000153	-7.32	0.772775	-2.52761			0.173425
1368865_at	0.000159	6.29e-06	-11.9	4.30936	-2.52749	Synpr	synaptoporin	0.17344
1387802_at	0.00377	0.000694	-5.72	-0.906105	-2.52713	Dlgap1	DLG associated protein 1	0.173484
1368401_at	0.0041	0.000773	-5.62	-1.02486	-2.52646	Gria2	glutamate ionotropic receptor AMPA type subunit 2	0.173564
1378856_at	0.00249	0.000402	-6.27	-0.30018	-2.52615	Tceal6///Tceal3	transcription elongation factor A (SII)-like 6///transcription elongation factor A like 3	0.173601
1395433_at	0.000725	7.06e-05	-8.26	1.63231	-2.5256			0.173668
1374596_at	0.000128	4.11e-06	-12.7	4.77865	-2.5202	RGD1309594	similar to RIKEN cDNA 1810043G02; DNA segment, Chr 10, Johns Hopkins University 13, expressed	0.174318
1393314_at	0.00224	0.00035	-6.41	-0.147196	-2.51836	Fgf1	fibroblast growth factor 1	0.174541
1386685_at	0.000887	9.48e-05	-7.89	1.30413	-2.51573	Sacs	sacsin molecular chaperone	0.174859
1368887_at	0.000789	8.03e-05	-8.1	1.48838	-2.5095	Cdh22	cadherin 22	0.175617
1384197_at	0.00182	0.000263	-6.72	0.172048	-2.5032	Dlgap1	DLG associated protein 1	0.176385
1368135_at	0.00113	0.000133	-7.48	0.926053	-2.49945	Ninj2	ninjurin 2	0.176844
1391039_at	0.00123	0.000153	-7.32	0.771043	-2.49667			0.177186
1391727_at	0.000649	5.94e-05	-8.49	1.82431	-2.49622	Pak3	p21 (RAC1) activated kinase 3	0.17724
1397853_s_at	3.22e-05	3.72e-07	-18	7.3785	-2.49614	LOC100912165///Arhgef9	rho guanine nucleotide exchange factor 9-like///Cdc42 guanine nucleotide exchange factor 9	0.17725
1389514_at	0.00126	0.000157	-7.29	0.742956	-2.49494	Lingo1	leucine rich repeat and Ig domain containing 1	0.177398
1383258_at	8.04e-06	3.88e-08	-24.9	9.72897	-2.48901			0.178129
1383130_at	0.000164	6.59e-06	-11.8	4.25881	-2.48879	Rbfox1	RNA binding protein, fox-1 homolog 1	0.178156
1377839_at	0.000568	4.86e-05	-8.75	2.0472	-2.48631	Agap3	ArfGAP with GTPase domain, ankyrin repeat and PH domain 3	0.178462
1375707_at	0.0137	0.00346	-4.31	-2.67321	-2.48043			0.179191
1398425_at	0.00214	0.000329	-6.48	-0.079296	-2.48003	Fam110b	family with sequence similarity 110, member B	0.179241
1397871_at	0.000397	2.73e-05	-9.55	2.68605	-2.47891			0.17938
1391829_at	0.000175	7.33e-06	-11.6	4.14207	-2.47822	Fsd1l	fibronectin type III and SPRY domain containing 1-like	0.179466
1385552_at	0.00578	0.00119	-5.22	-1.50539	-2.47737			0.179571
1376564_at	0.000623	5.6e-05	-8.56	1.88943	-2.47735	Sptbn4	spectrin, beta, non-erythrocytic 4	0.179574
1387148_at	0.00146	0.000193	-7.06	0.512622	-2.47684	Gprasp1	G protein-coupled receptor associated sorting protein 1	0.179638
1383870_at	0.00019	8.31e-06	-11.4	4.00343	-2.47515	Hoxb6	homeo box B6	0.179848
1387424_at	0.000246	1.23e-05	-10.8	3.57428	-2.47457	Cntn2	contactin 2	0.17992
1368137_at	0.0011	0.00013	-7.51	0.953701	-2.47424	Mapt	microtubule-associated protein tau	0.179962
1388998_at	0.000611	5.44e-05	-8.6	1.92208	-2.47331	Dmtn	dematin actin binding protein	0.180077
1394448_at	0.00115	0.000137	-7.45	0.895209	-2.47097	Osbpl6	oxysterol binding protein-like 6	0.18037
1378099_at	0.00276	0.00046	-6.13	-0.448813	-2.47027			0.180458
1369462_at	0.001	0.000112	-7.69	1.11464	-2.4695	Gad2	glutamate decarboxylase 2	0.180554
1382835_at	0.00365	0.000668	-5.76	-0.863491	-2.46727			0.180833
1379859_at	0.433	0.227	-1.32	-6.96064	-2.46654			0.180925
1395429_at	2.09e-05	1.91e-07	-19.8	8.0844	-2.46612			0.180977
1398326_at	0.000309	1.81e-05	-10.2	3.14148	-2.46582	Chchd10	coiled-coil-helix-coiled-coil-helix domain containing 10	0.181015
1391447_at	0.00391	0.000728	-5.68	-0.958285	-2.46072			0.181656
1372555_at	0.000295	1.66e-05	-10.3	3.23764	-2.45917	Flywch1	FLYWCH-type zinc finger 1	0.181851
1389605_at	2.5e-05	2.47e-07	-19.1	7.81412	-2.45851	Jakmip1	janus kinase and microtubule interacting protein 1	0.181934
1367762_at	0.00173	0.000247	-6.78	0.24066	-2.45616	Sst	somatostatin	0.182232
1389223_at	0.00339	0.000605	-5.86	-0.753349	-2.45011	Rimklb	ribosomal modification protein rimK-like family member B	0.182997
1384133_at	0.00237	0.000377	-6.34	-0.228808	-2.44938	Kif1a	kinesin family member 1A	0.183089
1378774_at	0.0171	0.00455	-4.09	-2.97154	-2.44866			0.183181
1374546_at	0.00324	0.000569	-5.92	-0.684973	-2.44806	Pcdh17	protocadherin 17	0.183257
1390710_x_at	2.86e-05	3.06e-07	-18.5	7.58699	-2.44754	Sorl1	sortilin related receptor 1	0.183323
1370989_at	0.0285	0.00848	-3.61	-3.64599	-2.44677	Ret	ret proto-oncogene	0.183421
1382028_at	0.0036	0.000655	-5.78	-0.841816	-2.44155	Pex19	peroxisomal biogenesis factor 19	0.184085
1379605_at	0.000383	2.55e-05	-9.65	2.76148	-2.43921			0.184384
1374496_at	0.00815	0.00183	-4.84	-1.97556	-2.43842	Tril	TLR4 interactor with leucine-rich repeats	0.184485
1376341_at	0.000117	3.37e-06	-13	4.99581	-2.43731			0.184628
1370111_at	0.000122	3.62e-06	-12.9	4.91817	-2.43462			0.184973
1367851_at	0.00366	0.000669	-5.76	-0.86412	-2.43452	Ptgds	prostaglandin D2 synthase	0.184985
1382655_at	0.00235	0.000372	-6.35	-0.215611	-2.43344			0.185123
1393732_at	0.000133	4.39e-06	-12.5	4.70473	-2.43187			0.185325
1391802_at	0.000412	2.92e-05	-9.46	2.61255	-2.43148			0.185375
1383212_at	0.00335	0.000594	-5.88	-0.732382	-2.43144	Psd3	pleckstrin and Sec7 domain containing 3	0.18538
1380172_at	0.000337	2.07e-05	-9.96	2.99485	-2.43014	Kif5c	kinesin family member 5C	0.185548
1368542_at	0.000478	3.75e-05	-9.1	2.33499	-2.42436	Zfp423	zinc finger protein 423	0.186292
1372193_at	0.000142	5.02e-06	-12.3	4.55757	-2.42398	Impact	impact RWD domain protein	0.186342
1391486_at	0.00436	0.000834	-5.55	-1.10825	-2.42038			0.186807
1378083_at	0.00127	0.000159	-7.28	0.729328	-2.42006			0.186849
1388152_at	0.00101	0.000114	-7.67	1.1018	-2.41633	Map2	microtubule-associated protein 2	0.187332
1371003_at	0.000273	1.45e-05	-10.5	3.38744	-2.41596	Map1b	microtubule-associated protein 1B	0.187381
1376388_at	0.00339	0.000605	-5.86	-0.753818	-2.41592			0.187386
1396119_at	0.00048	3.78e-05	-9.09	2.3266	-2.41466			0.187549
1396405_at	0.00111	0.00013	-7.51	0.953022	-2.41464	Scn2b	sodium voltage-gated channel beta subunit 2	0.187552
1377681_at	0.000203	9.17e-06	-11.3	3.89485	-2.41246			0.187835
1372568_at	0.000412	2.91e-05	-9.46	2.61455	-2.41168	Epm2aip1	EPM2A interacting protein 1	0.187936
1390399_at	0.000968	0.000107	-7.75	1.17109	-2.4106	Crebl2	cAMP responsive element binding protein-like 2	0.188078
1369972_at	6.65e-05	1.33e-06	-14.9	6.01173	-2.41021	Fbxo21	F-box protein 21	0.188128
1370903_a_at	0.000125	3.88e-06	-12.8	4.84077	-2.41002	Ndrg3	NDRG family member 3	0.188154
1369693_a_at	0.0021	0.00032	-6.51	-0.048421	-2.40796	Slc1a2	solute carrier family 1 (glial high affinity glutamate transporter), member 2	0.188422
1372190_at	0.00444	0.000854	-5.53	-1.13535	-2.40509	Aqp4	aquaporin 4	0.188798
1384190_at	0.00202	0.000303	-6.56	0.012604	-2.405			0.188809
1393074_at	0.000283	1.55e-05	-10.4	3.31637	-2.40466	LOC100912566///RGD1563072	UPF0500 protein C1orf216 homolog///similar to hypothetical protein FLJ38984	0.188853
1378888_at	0.00542	0.0011	-5.29	-1.41612	-2.40403			0.188935
1391553_at	0.000159	6.31e-06	-11.9	4.30567	-2.40374			0.188974
1375925_at	0.000154	5.87e-06	-12	4.38588	-2.40119			0.189308
1369770_at	0.000263	1.38e-05	-10.6	3.44483	-2.40104	Sstr1	somatostatin receptor 1	0.189328
1376218_a_at	0.00462	0.000898	-5.48	-1.19097	-2.39875	LOC685152	ATPase, class I, type 8B, member 2	0.189629
1369756_a_at	0.00487	0.000963	-5.42	-1.26721	-2.39873	Slc4a4	solute carrier family 4 member 4	0.189632
1388423_at	0.00082	8.48e-05	-8.03	1.42833	-2.39793	RGD1302996	hypothetical protein MGC:15854	0.189736
1385868_at	0.000588	5.13e-05	-8.68	1.98659	-2.39638			0.189941
1387121_a_at	0.000792	8.08e-05	-8.09	1.48255	-2.39516	Ndrg2	NDRG family member 2	0.190101
1377458_at	3.13e-05	3.57e-07	-18.1	7.42262	-2.39321	LOC102547257///Sorl1	sortilin-related receptor-like///sortilin related receptor 1	0.190358
1381583_at	0.00061	5.42e-05	-8.61	1.9256	-2.39177	Nlgn1	neuroligin 1	0.190548
1378197_at	0.00162	0.000224	-6.89	0.350863	-2.38577	Kifc2	kinesin family member C2	0.191342
1394022_at	0.00345	0.000618	-5.84	-0.776485	-2.38334	Id4	inhibitor of DNA binding 4, HLH protein	0.191665
1393307_at	0.0153	0.00397	-4.2	-2.82256	-2.38096	Phactr3	phosphatase and actin regulator 3	0.191982
1385108_at	0.000406	2.86e-05	-9.49	2.63729	-2.38067			0.19202
1398412_at	0.000668	6.26e-05	-8.42	1.76653	-2.3799	Rnf182	ring finger protein 182	0.192123
1385923_at	0.0155	0.00403	-4.19	-2.83995	-2.37932	Id4	inhibitor of DNA binding 4, HLH protein	0.1922
1368618_at	0.0091	0.00209	-4.73	-2.12346	-2.37804	Grb14	growth factor receptor bound protein 14	0.19237
1387289_at	0.00127	0.000159	-7.28	0.729857	-2.37564	Apba2	amyloid beta precursor protein binding family A member 2	0.192691
1368098_a_at	0.00132	0.000168	-7.22	0.669297	-2.37434	LOC688682///Snurf///Snrpn	similar to small nuclear ribonucleoparticle-associated protein///SNRPN upstream reading frame///small nuclear ribonucleoprotein polypeptide N	0.192864
1374582_at	0.000506	4.09e-05	-8.98	2.23782	-2.3736	Kctd9	potassium channel tetramerization domain containing 9	0.192964
1387364_at	0.000202	9.07e-06	-11.3	3.9062	-2.37261	Folh1	folate hydrolase 1	0.193096
1383661_at	0.00358	0.00065	-5.79	-0.833662	-2.37172			0.193214
1376441_at	0.000315	1.87e-05	-10.1	3.1093	-2.37055	Pcnx4	pecanex homolog 4 (Drosophila)	0.193371
1371132_a_at	2.97e-05	3.28e-07	-18.3	7.51255	-2.36923	Ank3	ankyrin 3, node of Ranvier (ankyrin G)	0.193549
1389353_at	0.000246	1.23e-05	-10.8	3.57248	-2.36913	Sema6d	semaphorin 6D	0.193563
1383439_at	0.000519	4.25e-05	-8.93	2.19505	-2.36889	Npas2	neuronal PAS domain protein 2	0.193595
1379566_at	3.09e-05	3.5e-07	-18.1	7.44439	-2.36777	Rbm11	RNA binding motif protein 11	0.193745
1378237_at	4.49e-05	6.6e-07	-16.5	6.76574	-2.36639			0.19393
1369649_at	0.000961	0.000106	-7.76	1.18305	-2.36545	Cacna2d1	calcium voltage-gated channel auxiliary subunit alpha2delta 1	0.194056
1380883_at	0.000414	2.95e-05	-9.44	2.60272	-2.36313			0.194369
1371014_at	0.00193	0.000285	-6.63	0.081108	-2.3624	Plcb1	phospholipase C beta 1	0.194467
1390127_at	0.00304	0.000523	-6	-0.591722	-2.36236	Dixdc1	DIX domain containing 1	0.194473
1397688_at	0.00763	0.00169	-4.91	-1.8894	-2.3611	Pcdh9	protocadherin 9	0.194643
1369106_at	0.000113	3.22e-06	-13.1	5.04621	-2.35955	Tcea2	transcription elongation factor A2	0.194852
1389164_at	0.000638	5.8e-05	-8.52	1.8505	-2.3572	Herc3	HECT and RLD domain containing E3 ubiquitin protein ligase 3	0.19517
1395707_at	0.00039	2.64e-05	-9.6	2.72472	-2.35682	Fsd1l	fibronectin type III and SPRY domain containing 1-like	0.195221
1377648_at	0.00218	0.000338	-6.45	-0.10811	-2.3565	Fam120b	family with sequence similarity 120B	0.195264
1386026_at	3.95e-05	5.25e-07	-17.1	7.01263	-2.35575	Tet1	tet methylcytosine dioxygenase 1	0.195366
1390867_at	1.96e-05	1.56e-07	-20.4	8.29813	-2.35546	LOC100910054	NF-kappa-B-repressing factor-like	0.195405
1378805_at	8.97e-05	2.16e-06	-13.9	5.48309	-2.35513			0.19545
1378591_at	0.00292	0.000494	-6.06	-0.529087	-2.34969			0.196188
1389206_at	0.00277	0.000461	-6.13	-0.451658	-2.34403	Efr3b	EFR3 homolog B	0.196959
1385126_at	0.000823	8.53e-05	-8.02	1.42136	-2.34374			0.196999
1384470_at	1.98e-05	1.65e-07	-20.2	8.24045	-2.3419	Maneal	mannosidase, endo-alpha-like	0.19725
1376172_at	0.0348	0.0108	-3.43	-3.90685	-2.34052	Abcg4	ATP binding cassette subfamily G member 4	0.19744
1393149_at	0.00306	0.000527	-5.99	-0.601087	-2.33879	Pcdha11///Pcdhac2///Pcdhac1///Pcdha9///Pcdha7///Pcdha6///Pcdha5///Pcdha2///Pcdha1///Pcdha8///Pcdha3///Pcdha12///Pcdha10///Pcdha13///Pcdha4	protocadherin alpha 11///protocadherin alpha subfamily C, 2///protocadherin alpha subfamily C, 1///protocadherin alpha 9///protocadherin alpha 7///protocadherin alpha 6///protocadherin alpha 5///protocadherin alpha 2///protocadherin alpha 1///protocadherin alpha 8///protocadherin alpha 3///protocadherin alpha 12///protocadherin alpha 10///protocadherin alpha 13///protocadherin alpha 4	0.197676
1370132_at	0.000158	6.19e-06	-11.9	4.32825	-2.33539	Fkbp1b	FK506 binding protein 1B	0.198142
1398659_at	0.000902	9.72e-05	-7.86	1.27685	-2.33506	Vwc2	von Willebrand factor C domain containing 2	0.198188
1394422_at	0.00138	0.000178	-7.15	0.607075	-2.33233	Ttll7	tubulin tyrosine ligase like 7	0.198563
1376331_at	1.98e-05	1.62e-07	-20.3	8.26145	-2.33163	Atg2b	autophagy related 2B	0.19866
1386998_at	0.00246	0.000396	-6.28	-0.283709	-2.33031	Aldoc	aldolase, fructose-bisphosphate C	0.198841
1384183_at	0.000665	6.19e-05	-8.43	1.77894	-2.3291	Myrip	myosin VIIA and Rab interacting protein	0.199008
1398370_at	0.000114	3.26e-06	-13.1	5.03297	-2.32656	Adarb1	adenosine deaminase, RNA-specific, B1	0.199358
1372235_at	0.00243	0.00039	-6.3	-0.267393	-2.32619	Miat	myocardial infarction associated transcript (non-protein coding)	0.19941
1374217_at	0.000811	8.34e-05	-8.05	1.44732	-2.32516	Cdip1	cell death-inducing p53 target 1	0.199552
1384925_at	0.000502	4.03e-05	-9	2.25399	-2.32433	LOC100912219	uncharacterized LOC100912219	0.199668
1373178_at	0.00495	0.000981	-5.4	-1.28857	-2.32295			0.199858
1380811_at	0.000124	3.8e-06	-12.8	4.86355	-2.3216	Ptpn4	protein tyrosine phosphatase, non-receptor type 4	0.200046
1390240_at	0.00021	9.68e-06	-11.2	3.83449	-2.32024			0.200234
1387071_a_at	0.00111	0.000131	-7.5	0.944296	-2.31982	Mapt	microtubule-associated protein tau	0.200293
1372318_at	0.00181	0.000262	-6.72	0.175798	-2.31827			0.200508
1390883_at	0.000575	4.97e-05	-8.72	2.02303	-2.31788	Akap11	A-kinase anchoring protein 11	0.200563
1379860_at	0.00201	0.000303	-6.57	0.01453	-2.31647			0.200757
1396860_s_at	0.000192	8.41e-06	-11.4	3.99003	-2.31602	Zfp423	zinc finger protein 423	0.200821
1387689_at	0.00635	0.00134	-5.11	-1.63412	-2.31582	Kcnab2	potassium voltage-gated channel subfamily A regulatory beta subunit 2	0.200849
1371671_at	0.000649	5.97e-05	-8.48	1.81913	-2.31518			0.200938
1370513_at	6.22e-05	1.2e-06	-15.2	6.12129	-2.31232	Tpm1	tropomyosin 1, alpha	0.201337
1374622_at	0.00192	0.000283	-6.64	0.088504	-2.31069	Amot	angiomotin	0.201564
1398368_at	0.000125	3.85e-06	-12.8	4.84971	-2.30966	Unc80	unc-80 homolog, NALCN activator	0.201708
1377163_at	0.000125	3.9e-06	-12.8	4.83464	-2.30854	Inhbb	inhibin beta B subunit	0.201865
1389256_at	0.000392	2.67e-05	-9.59	2.71267	-2.30737			0.202029
1371007_at	0.000148	5.37e-06	-12.2	4.48319	-2.30593	Epha5	EPH receptor A5	0.20223
1368263_a_at	0.00436	0.000833	-5.55	-1.10765	-2.30582	Mobp	myelin-associated oligodendrocyte basic protein	0.202245
1378246_at	0.000158	6.24e-06	-11.9	4.31953	-2.30543	Pptc7	PTC7 protein phosphatase homolog	0.202301
1391269_at	0.00337	0.0006	-5.87	-0.744492	-2.30218	Pim2	Pim-2 proto-oncogene, serine/threonine kinase	0.202756
1392924_at	0.014	0.00357	-4.28	-2.70624	-2.30102	Vldlr	very low density lipoprotein receptor	0.202919
1388561_at	0.00148	0.000198	-7.03	0.487549	-2.30042			0.203004
1391944_at	0.000723	7.03e-05	-8.27	1.63675	-2.30014	Fam184a	family with sequence similarity 184, member A	0.203044
1374929_at	0.000207	9.49e-06	-11.2	3.85679	-2.29671	Ccdc126	coiled-coil domain containing 126	0.203526
1376901_a_at	0.00139	0.00018	-7.14	0.592597	-2.29521	Elfn2	extracellular leucine-rich repeat and fibronectin type III domain containing 2	0.203739
1387040_at	0.00884	0.00202	-4.76	-2.08293	-2.2929	Mal	mal, T-cell differentiation protein	0.204064
1367812_at	0.000405	2.83e-05	-9.5	2.6473	-2.2923	Sptbn2	spectrin, beta, non-erythrocytic 2	0.20415
1373967_at	0.000124	3.72e-06	-12.9	4.8863	-2.29143	Sub1	SUB1 homolog, transcriptional regulator	0.204273
1371922_at	0.00121	0.000149	-7.35	0.802218	-2.29052			0.204401
1385323_at	0.00993	0.00233	-4.63	-2.24082	-2.2884			0.204703
1375625_at	0.00554	0.00113	-5.27	-1.44816	-2.28788	Paqr8	progestin and adipoQ receptor family member 8	0.204776
1397215_at	0.000352	2.22e-05	-9.86	2.91617	-2.28712			0.204884
1388948_at	0.000524	4.33e-05	-8.91	2.17484	-2.28574	Stard10	StAR-related lipid transfer domain containing 10	0.20508
1380486_at	0.000167	6.78e-06	-11.8	4.2266	-2.28454	Sec22c	SEC22 homolog C, vesicle trafficking protein	0.205252
1387720_at	0.0278	0.00825	-3.63	-3.61694	-2.28368	Clstn2	calsyntenin 2	0.205373
1387385_at	0.00942	0.00218	-4.69	-2.16836	-2.28301	Cntn1	contactin 1	0.205469
1381369_at	0.000568	4.86e-05	-8.75	2.04737	-2.28287	Lgi3	leucine-rich repeat LGI family, member 3	0.205488
1394450_at	0.0133	0.00335	-4.33	-2.63868	-2.28089			0.205771
1387003_at	0.000518	4.24e-05	-8.94	2.19883	-2.27996	Luzp1	leucine zipper protein 1	0.205903
1375528_at	0.0206	0.00573	-3.91	-3.22319	-2.27986	Pnpla8	patatin-like phospholipase domain containing 8	0.205918
1373635_at	0.0412	0.0132	-3.28	-4.12437	-2.27974	Mypop	Myb-related transcription factor, partner of profilin	0.205934
1371052_at	0.0659	0.0232	-2.89	-4.7191	-2.27967	Nog	noggin	0.205945
1372296_at	0.002	0.0003	-6.58	0.025496	-2.27764	Sh3bgr	SH3 domain binding glutamate-rich protein	0.206235
1387224_at	8.72e-06	4.4e-08	-24.4	9.60053	-2.27736	Dgkb	diacylglycerol kinase, beta	0.206275
1376987_at	0.000517	4.23e-05	-8.94	2.2019	-2.277	Lrrc49	leucine rich repeat containing 49	0.206326
1390540_at	0.00259	0.000423	-6.22	-0.355953	-2.276	Snph	syntaphilin	0.20647
1387377_a_at	0.0109	0.00261	-4.54	-2.36388	-2.27473	Pak1	p21 (RAC1) activated kinase 1	0.206651
1396265_at	0.00506	0.00101	-5.37	-1.31698	-2.27433			0.206708
1377431_at	0.00213	0.000327	-6.48	-0.069727	-2.27369	Dpcd	deleted in primary ciliary dyskinesia	0.2068
1368344_at	0.000966	0.000106	-7.75	1.1758	-2.27269	Gad1	glutamate decarboxylase 1	0.206944
1388575_at	0.000275	1.47e-05	-10.5	3.37419	-2.27052	LOC100910827	uncharacterized LOC100910827	0.207255
1368864_at	0.000402	2.79e-05	-9.52	2.66364	-2.27042	Synpr	synaptoporin	0.20727
1382555_at	0.000333	2.04e-05	-9.98	3.01042	-2.26613	LOC102549407	uncharacterized LOC102549407	0.207887
1375890_at	0.000595	5.22e-05	-8.65	1.96686	-2.26524	Dact3	dishevelled-binding antagonist of beta-catenin 3	0.208014
1378547_at	0.00114	0.000135	-7.47	0.910046	-2.26342			0.208278
1382938_at	0.000615	5.5e-05	-8.59	1.90989	-2.26199			0.208484
1368933_at	0.000171	7.04e-06	-11.7	4.18583	-2.26188	Adarb1	adenosine deaminase, RNA-specific, B1	0.2085
1367839_at	0.00141	0.000185	-7.1	0.560338	-2.2612	Fdft1	farnesyl diphosphate farnesyl transferase 1	0.208599
1390606_at	0.000184	7.92e-06	-11.5	4.05574	-2.26027	Hhip	Hedgehog-interacting protein	0.208733
1373322_at	0.000289	1.6e-05	-10.4	3.2779	-2.2596			0.20883
1383135_at	0.00157	0.000214	-6.94	0.399225	-2.25813	Ntrk2	neurotrophic receptor tyrosine kinase 2	0.209042
1374329_at	0.000306	1.79e-05	-10.2	3.15763	-2.25748	Mcf2l	MCF.2 cell line derived transforming sequence-like	0.209137
1382118_at	0.00161	0.000221	-6.91	0.363122	-2.25402	Apeg3	antisense paternally expressed gene 3	0.20964
1376121_at	0.000193	8.52e-06	-11.4	3.97496	-2.25002			0.210221
1372781_at	8.03e-05	1.8e-06	-14.3	5.68015	-2.24917	Wdr47	WD repeat domain 47	0.210345
1368239_at	0.00452	0.000874	-5.51	-1.16081	-2.24855	Lrp3	LDL receptor related protein 3	0.210436
1373883_at	0.0131	0.00329	-4.35	-2.61949	-2.24834	Cdadc1	cytidine and dCMP deaminase domain containing 1	0.210466
1398447_at	2.52e-06	5.35e-09	-33	11.6509	-2.24801	Igip	IgA-inducing protein	0.210514
1379073_at	0.00334	0.000591	-5.88	-0.728213	-2.24648	Slc25a23	solute carrier family 25 member 23	0.210738
1387059_at	0.000296	1.67e-05	-10.3	3.229	-2.24477	Stk39	serine threonine kinase 39	0.210988
1389120_at	0.0171	0.00457	-4.08	-2.97773	-2.2437	Kcnc3	potassium voltage-gated channel subfamily C member 3	0.211144
1393056_at	0.000682	6.44e-05	-8.38	1.73363	-2.2417			0.211437
1395373_at	0.000472	3.66e-05	-9.14	2.36084	-2.24118			0.211513
1368306_at	0.00693	0.0015	-5.01	-1.75684	-2.23848	Grin2c	glutamate ionotropic receptor NMDA type subunit 2C	0.21191
1379416_at	0.000927	0.000101	-7.81	1.23366	-2.2378	LOC100362819	autism susceptibility candidate 2-like	0.21201
1373787_at	0.00205	0.00031	-6.54	-0.01377	-2.23609	Slc6a9	solute carrier family 6 member 9	0.21226
1373179_at	0.000145	5.22e-06	-12.2	4.51605	-2.23367	Btbd8	BTB (POZ) domain containing 8	0.212618
1378808_at	0.0113	0.00274	-4.5	-2.41895	-2.23325			0.212678
1374218_at	0.00281	0.000471	-6.11	-0.477132	-2.23147			0.212942
1371494_at	0.000839	8.79e-05	-7.99	1.38829	-2.2313	Lancl1	LanC like 1	0.212966
1390037_at	0.00983	0.0023	-4.65	-2.22599	-2.2309	Nkain4	Na+/K+ transporting ATPase interacting 4	0.213026
1380338_at	0.0133	0.00333	-4.34	-2.63239	-2.23001	Sh2d5	SH2 domain containing 5	0.213157
1370964_at	0.00487	0.00096	-5.42	-1.26458	-2.22912	Ass1	argininosuccinate synthase 1	0.213288
1395464_at	0.000502	4.04e-05	-9	2.25281	-2.22772	Kctd17	potassium channel tetramerization domain containing 17	0.213496
1389737_at	0.0148	0.00383	-4.23	-2.78419	-2.2277	Dtna	dystrobrevin, alpha	0.213499
1370881_at	0.0031	0.000535	-5.98	-0.617155	-2.22759	Tst	thiosulfate sulfurtransferase	0.213515
1372095_at	0.000281	1.53e-05	-10.4	3.32786	-2.227	RGD1309821	similar to KIAA1161 protein	0.213603
1375908_at	0.0619	0.0215	-2.94	-4.63981	-2.22508	Mpzl2	myelin protein zero-like 2	0.213887
1368249_at	0.0223	0.00632	-3.83	-3.32826	-2.22401	Klf15	Kruppel-like factor 15	0.214045
1378152_at	0.00768	0.00171	-4.9	-1.89774	-2.22139	Cdkl5	cyclin-dependent kinase-like 5	0.214435
1376702_at	0.00813	0.00183	-4.84	-1.97332	-2.22078	Mlc1	megalencephalic leukoencephalopathy with subcortical cysts 1	0.214525
1397184_at	0.00666	0.00143	-5.06	-1.70238	-2.22074	Soga3	SOGA family member 3	0.214531
1369144_a_at	0.00542	0.0011	-5.29	-1.41394	-2.21979	Kcnd3	potassium voltage-gated channel subfamily D member 3	0.214673
1390437_at	0.00766	0.0017	-4.9	-1.89394	-2.21884	Sema5a	semaphorin 5A	0.214814
1367835_at	0.00141	0.000185	-7.11	0.563316	-2.21629	Pcsk1n	proprotein convertase subtilisin/kexin type 1 inhibitor	0.215195
1374389_at	0.000376	2.47e-05	-9.7	2.79635	-2.21563	Gucy1b3	guanylate cyclase 1 soluble subunit beta 3	0.215292
1367970_at	0.00165	0.00023	-6.86	0.318397	-2.21444	Pfn2	profilin 2	0.21547
1384651_at	0.000846	8.88e-05	-7.97	1.37738	-2.21348			0.215614
1369135_at	0.00676	0.00146	-5.04	-1.72347	-2.2117	Syt11	synaptotagmin 11	0.21588
1372895_at	0.000171	7.1e-06	-11.7	4.17661	-2.21133	RGD1309676	similar to RIKEN cDNA 5730469M10	0.215935
1376395_at	5.74e-05	1.01e-06	-15.5	6.30619	-2.20994	Zdbf2	zinc finger, DBF-type containing 2	0.216143
1393000_at	0.00165	0.000231	-6.86	0.31637	-2.20965	LOC100910792	amphiphysin-like	0.216187
1373331_at	5.85e-05	1.07e-06	-15.4	6.24043	-2.20926	Lrsam1	leucine rich repeat and sterile alpha motif containing 1	0.216245
1381584_at	0.00164	0.000227	-6.87	0.331665	-2.20776			0.21647
1377932_at	0.00607	0.00126	-5.17	-1.56828	-2.20712	Nacc2	NACC family member 2	0.216566
1393765_at	0.00098	0.000109	-7.72	1.14773	-2.20353			0.217106
1374280_at	0.00407	0.000765	-5.63	-1.01364	-2.20265	Cbln2	cerebellin 2 precursor	0.217239
1381591_at	0.000142	5.05e-06	-12.3	4.5524	-2.20168			0.217385
1389398_at	0.0145	0.00374	-4.24	-2.75929	-2.20139	Ank1	ankyrin 1	0.217428
1368505_at	1.22e-05	7.59e-08	-22.6	9.0457	-2.20106	Rgs4	regulator of G-protein signaling 4	0.217478
1395236_at	0.00711	0.00155	-4.99	-1.79206	-2.2003	Ppp1r3c	protein phosphatase 1, regulatory subunit 3C	0.217592
1387179_at	0.000314	1.85e-05	-10.1	3.11588	-2.19902	Adcy8	adenylate cyclase 8	0.217786
1387199_a_at	0.000603	5.32e-05	-8.63	1.94669	-2.19888	Arhgef9	Cdc42 guanine nucleotide exchange factor 9	0.217807
1369847_at	0.0111	0.00267	-4.52	-2.39149	-2.19868	Kcnab1	potassium voltage-gated channel subfamily A member regulatory beta subunit 1	0.217837
1394362_at	0.000684	6.47e-05	-8.37	1.72911	-2.19822	LOC100363248	Temporarily Assigned Gene name family member (tag-241)-like	0.217906
1387032_at	0.000125	3.91e-06	-12.8	4.83152	-2.19727	Cck	cholecystokinin	0.21805
1384444_at	0.000407	2.87e-05	-9.48	2.63265	-2.19715	Tmem91	transmembrane protein 91	0.218069
1378855_a_at	2.14e-05	1.99e-07	-19.7	8.04171	-2.19364	Tceal5///Tceal6///Tceal3	transcription elongation factor A like 5///transcription elongation factor A (SII)-like 6///transcription elongation factor A like 3	0.2186
1378954_at	0.000457	3.45e-05	-9.22	2.42663	-2.19288			0.218714
1376278_at	4.72e-05	7.16e-07	-16.3	6.67881	-2.1917			0.218893
1392633_at	0.00363	0.000663	-5.77	-0.854038	-2.18916			0.21928
1393659_at	0.00731	0.0016	-4.96	-1.82918	-2.18897	Tram1l1	translocation associated membrane protein 1-like 1	0.219307
1380082_at	0.00261	0.000427	-6.21	-0.366618	-2.18876			0.219341
1383164_at	0.000247	1.23e-05	-10.8	3.56765	-2.18651	Arhgef26	Rho guanine nucleotide exchange factor 26	0.219683
1389805_at	0.00151	0.000202	-7	0.461007	-2.18582	LOC100910532	uncharacterized LOC100910532	0.219787
1387505_at	0.00409	0.00077	-5.63	-1.02045	-2.18392	Gnai1	G protein subunit alpha i1	0.220077
1395694_at	7.03e-05	1.42e-06	-14.8	5.93763	-2.18333	Fbxo9	f-box protein 9	0.220167
1384703_at	0.000745	7.36e-05	-8.21	1.58565	-2.18213			0.220351
1391342_at	9.02e-05	2.19e-06	-13.9	5.46671	-2.17905			0.220821
1382098_at	0.00137	0.000177	-7.15	0.610118	-2.17762			0.22104
1376310_at	0.00149	0.000199	-7.02	0.480935	-2.17625			0.22125
1387103_s_at	0.000475	3.71e-05	-9.12	2.34756	-2.17397	Slc25a14	solute carrier family 25 member 14	0.2216
1376784_at	0.000447	3.33e-05	-9.27	2.46653	-2.1727	Fnbp1	formin binding protein 1	0.221796
1374930_at	0.00066	6.13e-05	-8.44	1.78864	-2.17259	Shisa9	shisa family member 9	0.221812
1367918_at	0.000581	5.06e-05	-8.7	2.00213	-2.17237	Fez1	fasciculation and elongation protein zeta 1	0.221845
1395965_at	0.000459	3.48e-05	-9.21	2.41676	-2.17099			0.222058
1397436_at	4.4e-05	6.41e-07	-16.6	6.79753	-2.17084	Luzp2	leucine zipper protein 2	0.222081
1384780_at	0.0377	0.0119	-3.36	-4.01063	-2.16796	Cpne4	copine 4	0.222525
1376000_at	0.00969	0.00226	-4.66	-2.20692	-2.16593			0.222839
1388299_at	0.0106	0.00252	-4.57	-2.32623	-2.16493	Dnal1	dynein, axonemal, light chain 1	0.222992
1376516_at	1.38e-05	9.4e-08	-21.9	8.82434	-2.16372	Flywch1	FLYWCH-type zinc finger 1	0.22318
1378988_at	0.000392	2.67e-05	-9.59	2.71316	-2.16329	Mab21l2	mab-21 like 2	0.223247
1367784_a_at	0.00136	0.000174	-7.17	0.627435	-2.16326	Clu	clusterin	0.223252
1376363_at	0.000678	6.4e-05	-8.39	1.74176	-2.16088	Actr10	actin-related protein 10 homolog	0.22362
1384587_at	0.000954	0.000105	-7.77	1.19321	-2.16045	Pak3	p21 (RAC1) activated kinase 3	0.223687
1379906_at	0.0127	0.00317	-4.38	-2.57686	-2.15645	Atp1b2	ATPase Na+/K+ transporting subunit beta 2	0.224308
1395509_at	0.000631	5.71e-05	-8.54	1.86778	-2.15633			0.224326
1382478_at	0.000225	1.07e-05	-11	3.71939	-2.15551	Btbd3	BTB domain containing 3	0.224453
1388305_at	0.000602	5.3e-05	-8.63	1.9501	-2.15383	Araf	A-Raf proto-oncogene, serine/threonine kinase	0.224715
1368879_a_at	0.00975	0.00228	-4.65	-2.21477	-2.15341	Gnao1	G protein subunit alpha o1	0.224781
1396542_at	0.00273	0.000453	-6.15	-0.432907	-2.15034			0.22526
1395672_at	0.000108	2.97e-06	-13.3	5.13561	-2.14617			0.225912
1398613_at	3.6e-06	1.03e-08	-30	11.0331	-2.1459			0.225954
1385747_at	0.0013	0.000164	-7.24	0.692091	-2.14578			0.225973
1391639_at	0.000307	1.8e-05	-10.2	3.1477	-2.14496			0.226101
1388263_at	0.0155	0.00404	-4.18	-2.84245	-2.14414	Kcna6	potassium voltage-gated channel subfamily A member 6	0.22623
1373977_at	0.000396	2.72e-05	-9.56	2.69136	-2.14349			0.226332
1367944_at	0.000301	1.73e-05	-10.2	3.19093	-2.14297	Chst10	carbohydrate sulfotransferase 10	0.226414
1383216_at	3.45e-05	4.24e-07	-17.6	7.2406	-2.13887	Atmin	ATM interactor	0.227058
1369694_at	0.000209	9.58e-06	-11.2	3.84634	-2.13866	Slc1a2	solute carrier family 1 (glial high affinity glutamate transporter), member 2	0.227091
1370638_at	0.000122	3.65e-06	-12.9	4.90808	-2.13788	Ank3	ankyrin 3, node of Ranvier (ankyrin G)	0.227214
1392506_at	0.00039	2.65e-05	-9.6	2.72096	-2.137	Cryzl1	crystallin zeta like 1	0.227353
1374641_at	5.6e-05	9.6e-07	-15.7	6.36266	-2.13644	Lmtk2	lemur tyrosine kinase 2	0.227441
1373202_at	0.000441	3.24e-05	-9.31	2.49664	-2.13549	Gng3	G protein subunit gamma 3	0.22759
1369977_at	0.0012	0.000146	-7.38	0.824476	-2.13545	Uchl1	ubiquitin C-terminal hydrolase L1	0.227596
1374957_at	0.000377	2.49e-05	-9.69	2.78935	-2.13367	Stxbp5	syntaxin binding protein 5	0.227877
1367977_at	0.00415	0.000786	-5.61	-1.04242	-2.13244	Snca	synuclein alpha	0.228072
1368138_at	0.000477	3.73e-05	-9.11	2.34153	-2.13179	Mapt	microtubule-associated protein tau	0.228174
1376619_at	0.00185	0.00027	-6.69	0.141282	-2.1312	Ptprd	protein tyrosine phosphatase, receptor type, D	0.228268
1393309_at	0.000826	8.58e-05	-8.02	1.4151	-2.13091			0.228314
1380741_at	0.00494	0.000979	-5.4	-1.28592	-2.13076			0.228338
1398658_at	0.0107	0.00257	-4.55	-2.34745	-2.13003			0.228453
1368038_at	0.00213	0.000326	-6.49	-0.069042	-2.12944	Synj2bp	synaptojanin 2 binding protein	0.228547
1376707_at	0.00338	0.000601	-5.87	-0.746007	-2.12754	C1qtnf4	C1q and tumor necrosis factor related protein 4	0.228847
1384233_at	0.000122	3.64e-06	-12.9	4.91245	-2.1255			0.229171
1378163_at	0.000125	3.9e-06	-12.8	4.83594	-2.12416	Grem2	gremlin 2, DAN family BMP antagonist	0.229385
1379336_at	0.000333	2.04e-05	-9.98	3.00942	-2.12277			0.229606
1369640_at	0.00406	0.000762	-5.64	-1.00878	-2.12199	Gja1	gap junction protein, alpha 1	0.22973
1371889_at	0.00154	0.000208	-6.97	0.431213	-2.1219	Slc22a17	solute carrier family 22, member 17	0.229745
1381084_at	0.000263	1.37e-05	-10.6	3.44898	-2.12058			0.229955
1383331_at	0.000766	7.68e-05	-8.16	1.53869	-2.12038			0.229987
1382789_at	0.000278	1.49e-05	-10.5	3.35663	-2.12018			0.230018
1396058_at	2.03e-05	1.8e-07	-20	8.14758	-2.1175	Igip	IgA-inducing protein	0.230447
1386119_at	0.0105	0.00249	-4.58	-2.31265	-2.11652			0.230602
1369799_at	0.000362	2.33e-05	-9.78	2.86299	-2.11421	Abat	4-aminobutyrate aminotransferase	0.230972
1384741_at	5.8e-05	1.03e-06	-15.5	6.28493	-2.11365	Pla2g3	phospholipase A2, group III	0.231062
1377621_at	0.000376	2.47e-05	-9.7	2.79746	-2.11319			0.231135
1376836_at	0.000453	3.41e-05	-9.24	2.44134	-2.11236	LOC102557228///LOC102552061	uncharacterized LOC102557228///uncharacterized LOC102552061	0.231269
1379332_at	0.000977	0.000109	-7.73	1.15339	-2.11093	Fbxw7	F-box and WD repeat domain containing 7	0.231498
1383807_at	0.00385	0.000714	-5.7	-0.936685	-2.10866	Tbc1d19	TBC1 domain family, member 19	0.231863
1389240_at	0.000397	2.74e-05	-9.55	2.68437	-2.10801			0.231966
1382458_at	0.00106	0.000122	-7.59	1.02609	-2.10642			0.232222
1393576_at	0.00672	0.00144	-5.05	-1.71507	-2.1059			0.232306
1371665_at	0.000253	1.29e-05	-10.7	3.51628	-2.10472	Smarcd3	SWI/SNF related, matrix associated, actin dependent regulator of chromatin, subfamily d, member 3	0.232497
1393910_at	0.0119	0.00293	-4.45	-2.48971	-2.10371	Fam13a	family with sequence similarity 13, member A	0.232659
1377054_at	0.0188	0.00514	-3.99	-3.10531	-2.10128	Sema4d	semaphorin 4D	0.233051
1391506_at	0.000345	2.16e-05	-9.9	2.94719	-2.09897			0.233425
1372521_at	0.00252	0.000408	-6.25	-0.317601	-2.09882	Rnd2	Rho family GTPase 2	0.233449
1391153_at	0.00449	0.000867	-5.51	-1.15149	-2.09818			0.233552
1383867_at	0.000257	1.32e-05	-10.7	3.49108	-2.09718	Eif5a2	eukaryotic translation initiation factor 5A2	0.233715
1379776_at	0.00561	0.00115	-5.25	-1.46497	-2.09675	Erich3	glutamate-rich 3	0.233784
1386962_at	0.00385	0.000712	-5.7	-0.933598	-2.09619	Plcb4	phospholipase C, beta 4	0.233876
1372226_at	0.000214	9.9e-06	-11.1	3.81018	-2.09487			0.234088
1392933_a_at	0.000939	0.000103	-7.79	1.21537	-2.0944	Bcl7a	BCL tumor suppressor 7A	0.234166
1374591_at	0.00736	0.00162	-4.95	-1.83954	-2.09395	Ptprd	protein tyrosine phosphatase, receptor type, D	0.234239
1396743_at	0.00661	0.00141	-5.07	-1.6918	-2.09018			0.234852
1384608_at	0.00551	0.00112	-5.27	-1.43877	-2.08831	Opa1	OPA1, mitochondrial dynamin like GTPase	0.235155
1368682_at	0.000481	3.79e-05	-9.09	2.32381	-2.08752	Sv2a	synaptic vesicle glycoprotein 2a	0.235284
1369047_at	0.000428	3.1e-05	-9.37	2.54727	-2.0865	Sult1d1	sulfotransferase family 1D, member 1	0.235452
1393736_at	0.000147	5.33e-06	-12.2	4.49221	-2.08642			0.235464
1392285_at	0.000498	3.99e-05	-9.02	2.26462	-2.08586	Shisa4	shisa family member 4	0.235556
1395357_at	0.000109	3.01e-06	-13.3	5.11788	-2.08393	Map1b	microtubule-associated protein 1B	0.235871
1387629_at	0.00133	0.00017	-7.2	0.657695	-2.08167	Bspry	B-box and SPRY domain containing	0.236241
1367996_a_at	3.24e-05	3.78e-07	-17.9	7.36265	-2.0815	Adgrl1	adhesion G protein-coupled receptor L1	0.236269
1395986_at	0.000828	8.62e-05	-8.01	1.40988	-2.08022	Slit2	slit guidance ligand 2	0.236479
1397177_at	0.00157	0.000214	-6.94	0.401137	-2.07877	Cdh7	cadherin 7	0.236716
1391534_at	0.0564	0.0193	-3.01	-4.5265	-2.07869	Elovl2	ELOVL fatty acid elongase 2	0.23673
1389874_at	0.00223	0.000348	-6.42	-0.140686	-2.07664	Zrsr1	zinc finger (CCCH type), RNA binding motif and serine/arginine rich 1	0.237067
1389653_at	0.0275	0.00815	-3.64	-3.603	-2.07604	Pcdhb9	protocadherin beta 9	0.237164
1378304_at	5.82e-05	1.05e-06	-15.5	6.26068	-2.07547			0.237257
1370601_a_at	0.0133	0.00336	-4.33	-2.64095	-2.07512	Grin3a	glutamate ionotropic receptor NMDA type subunit 3A	0.237315
1380253_at	7.1e-05	1.45e-06	-14.8	5.91613	-2.07457			0.237406
1371680_at	0.000438	3.21e-05	-9.32	2.50817	-2.07446	Gabarapl1	GABA type A receptor associated protein like 1	0.237424
1372682_at	0.000775	7.82e-05	-8.13	1.51833	-2.0737	Tmem246	transmembrane protein 246	0.237549
1373351_at	0.00178	0.000255	-6.75	0.205598	-2.07347	Ank2	ankyrin 2, neuronal	0.237588
1383950_at	0.000914	9.89e-05	-7.84	1.25718	-2.06892			0.238338
1397194_at	0.000163	6.56e-06	-11.8	4.26436	-2.06828	Tmx4	thioredoxin-related transmembrane protein 4	0.238444
1372146_at	0.0011	0.00013	-7.52	0.957519	-2.06822			0.238453
1387927_a_at	0.00251	0.000406	-6.26	-0.311875	-2.06261	Olfm1	olfactomedin 1	0.239383
1386660_at	0.000125	3.9e-06	-12.8	4.83578	-2.06192	Gng2	G protein subunit gamma 2	0.239497
1370614_s_at	0.00287	0.000483	-6.08	-0.504494	-2.06063	Stk39	serine threonine kinase 39	0.239712
1376989_at	9.62e-05	2.43e-06	-13.7	5.35328	-2.05981			0.239848
1389169_at	0.000224	1.07e-05	-11	3.72547	-2.0588	Pgrmc2	progesterone receptor membrane component 2	0.240015
1389955_at	0.00171	0.000241	-6.81	0.267312	-2.05837			0.240087
1380329_at	0.0162	0.00428	-4.14	-2.90492	-2.05822	Opalin	oligodendrocytic myelin paranodal and inner loop protein	0.240112
1370669_a_at	0.000356	2.27e-05	-9.83	2.89378	-2.05797	Pde10a	phosphodiesterase 10A	0.240154
1371281_at	0.0054	0.0011	-5.3	-1.40994	-2.05723	Hoxc8	homeobox C8	0.240277
1390558_at	0.00293	0.000498	-6.05	-0.537448	-2.05694	Stau2	staufen double-stranded RNA binding protein 2	0.240325
1376730_at	0.000124	3.77e-06	-12.8	4.87253	-2.05593	Pfdn2	prefoldin subunit 2	0.240493
1396057_at	0.00174	0.000249	-6.77	0.23056	-2.05515			0.240624
1394431_at	0.000721	6.99e-05	-8.28	1.64384	-2.05182	Cdadc1	cytidine and dCMP deaminase domain containing 1	0.24118
1386707_at	0.00014	4.95e-06	-12.3	4.57444	-2.05103			0.241313
1377392_at	0.00982	0.0023	-4.65	-2.22436	-2.05102	Daam2	dishevelled associated activator of morphogenesis 2	0.241313
1382785_at	0.0121	0.00297	-4.43	-2.50653	-2.04889	Kif1a	kinesin family member 1A	0.24167
1389556_at	0.00178	0.000255	-6.75	0.202708	-2.04485	Kifap3	kinesin-associated protein 3	0.242347
1376785_at	0.000308	1.81e-05	-10.2	3.14244	-2.04397	Chpt1	choline phosphotransferase 1	0.242495
1383459_at	0.00155	0.00021	-6.96	0.421915	-2.041	Lgi3	leucine-rich repeat LGI family, member 3	0.242995
1391007_s_at	0.000194	8.62e-06	-11.4	3.96241	-2.04051	Kcnj11	potassium voltage-gated channel subfamily J member 11	0.243078
1384272_at	0.00337	0.000599	-5.87	-0.743317	-2.04021			0.243128
1370687_a_at	0.00199	0.000297	-6.59	0.035998	-2.03787	Ntrk2	neurotrophic receptor tyrosine kinase 2	0.243523
1383654_a_at	0.000752	7.48e-05	-8.19	1.56711	-2.03738	Fn3k	fructosamine 3 kinase	0.243605
1394946_at	0.0132	0.00331	-4.34	-2.62632	-2.03689	Soga3	SOGA family member 3	0.243689
1387015_at	0.00104	0.000119	-7.62	1.04988	-2.03504	LOC100909840///Pfn2	profilin-2-like///profilin 2	0.244001
1377059_at	0.00541	0.0011	-5.29	-1.41282	-2.0347	Mapk8///Mapk10	mitogen-activated protein kinase 8///mitogen activated protein kinase 10	0.244059
1378111_at	0.00144	0.000189	-7.08	0.539989	-2.03434	Kcnd3	potassium voltage-gated channel subfamily D member 3	0.244119
1390508_at	0.000324	1.95e-05	-10.1	3.06147	-2.03339	Paip2b	poly(A) binding protein interacting protein 2B	0.244281
1393171_at	0.00417	0.000789	-5.6	-1.04791	-2.03336	Tmem47	transmembrane protein 47	0.244286
1394290_at	0.000249	1.26e-05	-10.7	3.54759	-2.03249			0.244434
1372612_at	0.000113	3.19e-06	-13.1	5.05644	-2.02998	Dynll2	dynein light chain LC8-type 2	0.244858
1379371_at	2.54e-05	2.55e-07	-19	7.77968	-2.02889			0.245043
1394401_at	0.00107	0.000124	-7.56	1.00232	-2.02866	Elovl6	ELOVL fatty acid elongase 6	0.245082
1382182_at	0.00143	0.000188	-7.09	0.542398	-2.02656	Hoxc9	homeobox C9	0.245439
1396381_at	0.000629	5.68e-05	-8.54	1.87426	-2.02645	Kiaa0895l	hypothetical protein LOC688736	0.245458
1384913_at	0.00441	0.000845	-5.54	-1.12365	-2.02507	Amot	angiomotin	0.245693
1369662_at	2.6e-06	5.6e-09	-32.8	11.6092	-2.02382	Scn2a	sodium voltage-gated channel alpha subunit 2	0.245906
1385229_at	0.000478	3.75e-05	-9.1	2.33429	-2.0238	Pcdh20	protocadherin 20	0.245909
1382517_at	0.0039	0.000725	-5.68	-0.953702	-2.02135			0.246327
1370103_at	0.000467	3.59e-05	-9.16	2.38211	-2.01853	Hcn1	hyperpolarization-activated cyclic nucleotide-gated potassium channel 1	0.246809
1382423_at	0.00313	0.000542	-5.97	-0.63162	-2.01846			0.246821
1392940_at	0.0169	0.0045	-4.1	-2.96071	-2.01807	Ptpdc1	protein tyrosine phosphatase domain containing 1	0.246889
1373023_at	0.000979	0.000109	-7.72	1.15097	-2.01681			0.247105
1391090_at	1.62e-05	1.18e-07	-21.2	8.59169	-2.01647			0.247162
1392382_at	0.00598	0.00124	-5.18	-1.55009	-2.0154			0.247346
1387666_at	0.00602	0.00125	-5.17	-1.55929	-2.0139	Gpr85	G protein-coupled receptor 85	0.247603
1394427_at	1.67e-05	1.25e-07	-21	8.52978	-2.0133			0.247706
1382225_at	3.31e-05	3.91e-07	-17.8	7.3265	-2.01289			0.247776
1371793_at	0.00337	0.0006	-5.87	-0.743767	-2.01251	Ufsp1	UFM1-specific peptidase 1	0.247841
1379580_at	0.0026	0.000424	-6.21	-0.35994	-2.01136	Chd6	chromodomain helicase DNA binding protein 6	0.248039
1384509_s_at	0.00127	0.00016	-7.27	0.723707	-2.00953	Pcdh17	protocadherin 17	0.248355
1372104_at	0.00114	0.000136	-7.46	0.906224	-2.00931			0.248392
1398454_at	4.3e-05	5.96e-07	-16.8	6.87655	-2.00673			0.248836
1397596_at	0.000468	3.61e-05	-9.16	2.37728	-2.00491	Trim2	tripartite motif-containing 2	0.249151
1370803_at	0.00176	0.000253	-6.76	0.215724	-2.00379	Zwint	ZW10 interacting kinetochore protein	0.249344
1383424_at	0.000272	1.45e-05	-10.5	3.39083	-2.0029	Cmpk2	cytidine/uridine monophosphate kinase 2	0.249498
1374241_at	0.000653	6.03e-05	-8.47	1.8079	-2.00146			0.249748
1388357_at	0.00123	0.000153	-7.32	0.770976	-1.99973	RGD1566401	similar to GTL2, imprinted maternally expressed untranslated	0.250046
1385046_at	4.27e-05	5.86e-07	-16.8	6.89473	-1.99906	Nxpe3	neurexophilin and PC-esterase domain family, member 3	0.250163
1389171_at	1.11e-05	6.47e-08	-23.1	9.20959	-1.9984	Tmem38a	transmembrane protein 38a	0.250278
1384814_at	0.00719	0.00157	-4.97	-1.80765	-1.99722			0.250482
1370849_at	0.0144	0.00371	-4.25	-2.74866	-1.99679	Hapln2	hyaluronan and proteoglycan link protein 2	0.250557
1367733_at	0.0183	0.00495	-4.02	-3.06429	-1.99435	Car2	carbonic anhydrase 2	0.250982
1387010_s_at	6e-05	1.13e-06	-15.3	6.18323	-1.99139	Scn1b	sodium voltage-gated channel beta subunit 1	0.251496
1383219_at	0.00672	0.00144	-5.05	-1.71464	-1.99032			0.251683
1374417_at	0.00462	0.000899	-5.48	-1.19128	-1.9903	Nrbp2	nuclear receptor binding protein 2	0.251686
1372192_at	0.00161	0.000221	-6.91	0.364382	-1.9901	Rprd1a	regulation of nuclear pre-mRNA domain containing 1A	0.251722
1374648_at	0.0153	0.00398	-4.2	-2.82541	-1.98925	Gpr155	G protein-coupled receptor 155	0.25187
1393345_at	0.000903	9.74e-05	-7.86	1.27414	-1.98917	Asph	aspartate-beta-hydroxylase	0.251884
1375307_at	0.000468	3.62e-05	-9.15	2.37319	-1.98902	Cbx6	chromobox 6	0.251909
1382898_at	0.00544	0.00111	-5.29	-1.42142	-1.98878			0.251952
1388384_at	0.00112	0.000133	-7.49	0.930402	-1.98795	Rusc2	RUN and SH3 domain containing 2	0.252096
1386012_at	0.00724	0.00158	-4.97	-1.81665	-1.98729			0.252212
1371754_at	0.000123	3.69e-06	-12.9	4.89473	-1.98542	Slc25a25	solute carrier family 25 member 25	0.252539
1383701_at	0.000359	2.31e-05	-9.8	2.87326	-1.98489			0.252631
1372921_at	0.000767	7.7e-05	-8.15	1.53526	-1.98479	Slc38a1	solute carrier family 38, member 1	0.25265
1368425_at	4.46e-05	6.51e-07	-16.6	6.7812	-1.98462	Caskin1	CASK interacting protein 1	0.25268
1380967_at	0.0405	0.013	-3.3	-4.10296	-1.98384	Nts	neurotensin	0.252817
1390440_at	0.000726	7.08e-05	-8.26	1.62918	-1.98257	Slc9a6	solute carrier family 9 member A6	0.253039
1392309_at	0.00398	0.000744	-5.66	-0.982329	-1.98087	Jam2	junctional adhesion molecule 2	0.253337
1379970_at	0.000288	1.6e-05	-10.4	3.28243	-1.9805	Epha4	Eph receptor A4	0.253403
1370218_at	0.000201	9.02e-06	-11.3	3.91206	-1.98013	Ldhb	lactate dehydrogenase B	0.253467
1383646_at	0.00217	0.000335	-6.46	-0.097422	-1.98005			0.253481
1373541_at	0.00134	0.000171	-7.2	0.650828	-1.97901	Arhgef17	Rho guanine nucleotide exchange factor 17	0.253663
1368154_at	0.000283	1.55e-05	-10.4	3.31633	-1.97873	Gucy1a3	guanylate cyclase 1 soluble subunit alpha 3	0.253713
1383159_at	0.000201	9.04e-06	-11.3	3.90996	-1.97865	Tom1l2	target of myb1 like 2 membrane trafficking protein	0.253728
1373108_at	0.00985	0.00231	-4.64	-2.22904	-1.97835	Ppp1r3c	protein phosphatase 1, regulatory subunit 3C	0.253779
1385519_at	0.000401	2.78e-05	-9.53	2.66745	-1.97693	Runx1t1	RUNX1 translocation partner 1	0.25403
1395381_at	0.0121	0.00297	-4.43	-2.5076	-1.97524			0.254328
1372386_at	0.00204	0.000308	-6.55	-0.003271	-1.97357	Senp2	Sumo1/sentrin/SMT3 specific peptidase 2	0.254623
1390443_at	0.00066	6.14e-05	-8.44	1.78798	-1.97185	RGD1563888	similar to DNA segment, Chr 16, ERATO Doi 472, expressed	0.254926
1384052_at	0.0103	0.00245	-4.59	-2.297	-1.97147	Osbpl6	oxysterol binding protein-like 6	0.254993
1395104_at	0.000295	1.67e-05	-10.3	3.23402	-1.97117			0.255046
1383963_at	0.000487	3.87e-05	-9.06	2.3	-1.97065	Cep170b	centrosomal protein 170B	0.255137
1387817_at	0.000364	2.36e-05	-9.77	2.8505	-1.9699	Nsg1	neuron specific gene family member 1	0.255271
1377237_at	0.00118	0.000144	-7.39	0.841701	-1.96972			0.255302
1374307_at	0.00125	0.000155	-7.3	0.754591	-1.96953			0.255336
1395334_at	0.000108	2.97e-06	-13.3	5.1321	-1.9693	Fam69b	family with sequence similarity 69, member B	0.255378
1369035_a_at	0.00399	0.000746	-5.66	-0.986011	-1.96914	Kcnj6	potassium voltage-gated channel subfamily J member 6	0.255404
1368615_a_at	0.000126	3.93e-06	-12.8	4.82736	-1.96663	Slc18a3	solute carrier family 18 member A3	0.25585
1391319_at	0.00516	0.00103	-5.35	-1.34215	-1.96541			0.256066
1389665_at	0.00184	0.000268	-6.7	0.151536	-1.96436	Habp4	hyaluronan binding protein 4	0.256253
1391326_at	5.8e-05	1.04e-06	-15.5	6.27577	-1.96349			0.256408
1368272_at	0.000287	1.58e-05	-10.4	3.29364	-1.96321	Got1	glutamic-oxaloacetic transaminase 1	0.256457
1374755_at	0.00161	0.000221	-6.91	0.363458	-1.96288			0.256516
1378107_at	0.00866	0.00197	-4.78	-2.05579	-1.96287	Rab27b	RAB27B, member RAS oncogene family	0.256517
1395045_at	0.0021	0.000322	-6.5	-0.0537	-1.96249	Ndufa7	NADH:ubiquinone oxidoreductase subunit A7	0.256586
1372140_at	0.000278	1.49e-05	-10.5	3.35833	-1.96198	Ccdc28a	coiled-coil domain containing 28A	0.256676
1397579_x_at	0.000834	8.71e-05	-8	1.39821	-1.9615	Apc2	APC2, WNT signaling pathway regulator	0.256762
1388145_at	0.0083	0.00187	-4.82	-2.00135	-1.95879	Tnxb	tenascin XB	0.257245
1383012_at	0.013	0.00325	-4.36	-2.604	-1.95848	Rhpn2	rhophilin, Rho GTPase binding protein 2	0.2573
1370302_at	0.000469	3.63e-05	-9.15	2.37141	-1.95809	Shroom2	shroom family member 2	0.257368
1390474_at	0.0157	0.00413	-4.17	-2.86609	-1.958	Nipal2	NIPA-like domain containing 2	0.257385
1372390_at	0.00073	7.14e-05	-8.25	1.61878	-1.95728	Apeg3	antisense paternally expressed gene 3	0.257513
1374444_at	0.0015	0.000201	-7.01	0.470691	-1.95701	Plxnb1	plexin B1	0.257561
1397665_at	0.0543	0.0185	-3.05	-4.47996	-1.95627			0.257694
1368740_at	0.0126	0.00313	-4.39	-2.56535	-1.95554	P2rx6	purinergic receptor P2X 6	0.257824
1390250_x_at	0.00173	0.000245	-6.79	0.248484	-1.95548	LOC685152	ATPase, class I, type 8B, member 2	0.257835
1382004_at	0.000736	7.23e-05	-8.23	1.60488	-1.95517	Clpb	ClpB homolog, mitochondrial AAA ATPase chaperonin	0.25789
1370966_at	0.000144	5.13e-06	-12.3	4.53444	-1.95468	Hcn2	hyperpolarization activated cyclic nucleotide-gated potassium channel 2	0.257977
1368729_a_at	0.0324	0.00989	-3.5	-3.81194	-1.9541	Adcyap1r1	adenylate cyclase activating polypeptide 1 receptor type 1	0.258082
1390130_at	0.00066	6.13e-05	-8.44	1.78811	-1.954			0.2581
1379626_at	0.000681	6.43e-05	-8.38	1.73669	-1.94928	Satb1	SATB homeobox 1	0.258945
1391032_at	0.0151	0.00393	-4.21	-2.81108	-1.94928	Sez6	seizure related 6 homolog	0.258945
1385014_at	0.00188	0.000276	-6.66	0.117211	-1.94836	Nudt10	nudix (nucleoside diphosphate linked moiety X)-type motif 10	0.25911
1390145_at	3.38e-05	4.09e-07	-17.7	7.2798	-1.94672	Dmxl2	Dmx-like 2	0.259406
1373237_at	0.0014	0.000181	-7.13	0.584343	-1.94605			0.259525
1370559_at	0.00779	0.00173	-4.89	-1.91563	-1.94574	Kcnc2	potassium voltage-gated channel subfamily C member 2	0.259582
1371618_s_at	0.00113	0.000135	-7.47	0.914949	-1.94525	Tubb3	tubulin, beta 3 class III	0.25967
1369256_at	0.00296	0.000504	-6.04	-0.55067	-1.9443	Bace1	beta-secretase 1	0.25984
1386769_at	0.00203	0.000306	-6.55	0.001435	-1.94386	Fam19a2	family with sequence similarity 19 member A2, C-C motif chemokine like	0.25992
1372716_at	0.00102	0.000115	-7.66	1.08831	-1.94376	RGD1308601	similar to hypothetical protein	0.259938
1379286_at	4.67e-05	7.05e-07	-16.4	6.69523	-1.94345	Rnf152	ring finger protein 152	0.259994
1385431_at	0.000414	2.94e-05	-9.45	2.60388	-1.94154	Zfp106	zinc finger protein 106	0.260338
1383399_at	0.000746	7.38e-05	-8.2	1.58223	-1.93945			0.260716
1379693_at	0.00869	0.00198	-4.77	-2.06011	-1.9387	Robo2	roundabout guidance receptor 2	0.260852
1388052_a_at	0.00608	0.00127	-5.16	-1.57187	-1.93826	Kcnq3	potassium voltage-gated channel subfamily Q member 3	0.26093
1383063_a_at	0.00206	0.000313	-6.53	-0.023919	-1.93789			0.260999
1382814_at	0.0058	0.0012	-5.22	-1.50917	-1.9372	Tenm3	teneurin transmembrane protein 3	0.261123
1391975_at	0.0508	0.0171	-3.1	-4.39583	-1.93706			0.261149
1371840_at	8.32e-05	1.91e-06	-14.2	5.61669	-1.93619	S1pr1	sphingosine-1-phosphate receptor 1	0.261305
1390339_at	0.000641	5.85e-05	-8.51	1.84135	-1.9361			0.261322
1389532_at	0.00115	0.000138	-7.44	0.888107	-1.9331			0.261866
1384229_at	0.00108	0.000126	-7.55	0.987947	-1.93199	Gnal	G protein subunit alpha L	0.262068
1377273_at	6.44e-05	1.26e-06	-15.1	6.06965	-1.9319	Whsc1	Wolf-Hirschhorn syndrome candidate 1	0.262084
1387639_at	0.00241	0.000384	-6.31	-0.250542	-1.93178	Hpcal4	hippocalcin-like 4	0.262106
1376892_at	0.000156	6.1e-06	-11.9	4.34329	-1.93103	Gria3	glutamate ionotropic receptor AMPA type subunit 3	0.262242
1388060_at	0.0262	0.00768	-3.69	-3.53952	-1.92827	Syt12	synaptotagmin 12	0.262744
1391444_at	0.000925	0.000101	-7.82	1.23748	-1.92827			0.262744
1370970_at	0.000284	1.56e-05	-10.4	3.31014	-1.92451	Kcnj14	potassium voltage-gated channel subfamily J member 14	0.263431
1368089_at	0.000386	2.6e-05	-9.62	2.74092	-1.92406	Pde2a	phosphodiesterase 2A	0.263512
1379367_at	0.000355	2.25e-05	-9.84	2.90201	-1.92342	Fam213b	family with sequence similarity 213, member B	0.263628
1398581_at	1.98e-05	1.63e-07	-20.2	8.24863	-1.92325			0.263661
1389600_at	0.0137	0.00348	-4.3	-2.67958	-1.92323	LOC102557419///LOC100912904///LOC100360856///LOC685796///LOC501396///LOC363306	disks large homolog 5-like///disks large homolog 5-like///hypothetical protein LOC100360856///similar to similar to RIKEN cDNA 1700001E04///hypothetical protein LOC501396///hypothetical protein LOC363306	0.263664
1370173_at	0.000343	2.13e-05	-9.91	2.95973	-1.9229			0.263724
1374935_at	0.000291	1.64e-05	-10.3	3.25428	-1.92244	Fsd1l	fibronectin type III and SPRY domain containing 1-like	0.263808
1382060_at	0.00065	5.98e-05	-8.48	1.816	-1.92202	Asph	aspartate-beta-hydroxylase	0.263884
1388662_at	0.0315	0.0096	-3.52	-3.77922	-1.92145			0.263989
1382358_at	0.00527	0.00106	-5.33	-1.37362	-1.92134			0.264009
1383995_at	0.0154	0.00402	-4.19	-2.83739	-1.91788			0.264644
1396126_at	0.00496	0.000983	-5.4	-1.29	-1.91728			0.264752
1390532_at	0.162	0.0671	-2.16	-5.80901	-1.91726	Slc13a4	solute carrier family 13 member 4	0.264757
1376495_at	0.0036	0.000655	-5.78	-0.841747	-1.9157	Sptb	spectrin, beta, erythrocytic	0.265043
1389155_at	0.000816	8.42e-05	-8.04	1.43626	-1.91521	Cbarp	CACN beta subunit associated regulatory protein	0.265133
1391549_at	0.000165	6.66e-06	-11.8	4.24754	-1.91254	Dcun1d4	defective in cullin neddylation 1 domain containing 4	0.265624
1396619_at	0.00183	0.000265	-6.71	0.160897	-1.91212			0.265701
1390458_at	0.000734	7.2e-05	-8.24	1.60987	-1.91132	Gigyf2	GRB10 interacting GYF protein 2	0.26585
1388778_at	0.00348	0.000626	-5.83	-0.790869	-1.91026	Ppm1k	protein phosphatase, Mg2+/Mn2+ dependent, 1K	0.266044
1394904_at	0.00108	0.000125	-7.56	0.996707	-1.90878	Necap1	NECAP endocytosis associated 1	0.266319
1376265_at	0.000136	4.62e-06	-12.5	4.64935	-1.90869	Steap2	STEAP2 metalloreductase	0.266334
1376167_at	0.00025	1.26e-05	-10.7	3.53997	-1.9077	Asb1	ankyrin repeat and SOCS box-containing 1	0.266518
1368554_at	0.0415	0.0134	-3.28	-4.13497	-1.90747	Pnlip	pancreatic lipase	0.266559
1389572_at	0.00157	0.000213	-6.95	0.406317	-1.90587	Me3	malic enzyme 3	0.266855
1371625_at	0.00022	1.04e-05	-11	3.75873	-1.90539	Pygb	phosphorylase, glycogen; brain	0.266944
1383293_at	0.000963	0.000106	-7.75	1.17896	-1.9038			0.267238
1369999_a_at	0.000737	7.25e-05	-8.23	1.60286	-1.90361	Nnat	neuronatin	0.267274
1393324_at	0.00385	0.000715	-5.7	-0.937935	-1.90124	Jam2	junctional adhesion molecule 2	0.267714
1372646_at	0.000297	1.69e-05	-10.3	3.21779	-1.90093	RGD1305645	similar to RIKEN cDNA 1500015O10	0.26777
1380992_at	0.0405	0.013	-3.3	-4.10455	-1.90047			0.267856
1381871_at	0.00074	7.28e-05	-8.22	1.59759	-1.9001	Magi1	membrane associated guanylate kinase, WW and PDZ domain containing 1	0.267926
1370076_at	0.0137	0.00347	-4.31	-2.67496	-1.89913	Kcnj16	potassium voltage-gated channel subfamily J member 16	0.268105
1368660_at	0.00463	0.0009	-5.48	-1.19229	-1.89858	Rapgef3	Rap guanine nucleotide exchange factor 3	0.268208
1398406_at	0.000785	7.97e-05	-8.11	1.49696	-1.89774	Scrn1	secernin 1	0.268363
1379354_at	0.000116	3.3e-06	-13.1	5.01908	-1.89682	Extl2	exostosin-like glycosyltransferase 2	0.268535
1368008_at	0.00966	0.00225	-4.66	-2.20246	-1.89625	Prom1	prominin 1	0.26864
1385633_at	0.00557	0.00114	-5.26	-1.45635	-1.895			0.268873
1377885_at	0.000852	8.96e-05	-7.96	1.36699	-1.89407			0.269047
1382262_at	0.000544	4.56e-05	-8.84	2.11749	-1.89398	Ube2e3	ubiquitin-conjugating enzyme E2E 3	0.269064
1371347_at	0.000767	7.69e-05	-8.15	1.53675	-1.89089	Tmem50b	transmembrane protein 50B	0.26964
1380681_at	0.0053	0.00107	-5.32	-1.38432	-1.89078	Rnf180	ring finger protein 180	0.269661
1393666_at	0.000142	5.04e-06	-12.3	4.55446	-1.89042			0.269729
1395372_at	0.00107	0.000123	-7.57	1.01084	-1.8894			0.269919
1373578_at	0.00158	0.000216	-6.93	0.391654	-1.88843	Trim2	tripartite motif-containing 2	0.270101
1395461_at	0.00126	0.000157	-7.29	0.74489	-1.88811	Apc2	APC2, WNT signaling pathway regulator	0.270161
1380964_at	0.00109	0.000126	-7.55	0.984444	-1.88771	Dtna	dystrobrevin, alpha	0.270236
1393081_at	8.89e-05	2.12e-06	-14	5.50061	-1.88601	Rasgef1a	RasGEF domain family, member 1A	0.270554
1397537_at	0.0242	0.00695	-3.76	-3.43177	-1.88488	LOC102557525///LOC102557419///LOC102557056///LOC100912904///LOC100912852///LOC100360856///LOC501396///MGC116197///LOC363181	disks large homolog 5-like///disks large homolog 5-like///uncharacterized LOC102557056///disks large homolog 5-like///disks large homolog 5-like///hypothetical protein LOC100360856///hypothetical protein LOC501396///similar to RIKEN cDNA 1700001E04///similar to RIKEN cDNA 1700001E04	0.270766
1383468_at	0.00109	0.000127	-7.54	0.980349	-1.88415			0.270904
1391672_at	0.000968	0.000107	-7.75	1.17073	-1.8836			0.271006
1379588_at	0.0311	0.00944	-3.53	-3.76146	-1.8836			0.271006
1381974_at	0.00178	0.000256	-6.74	0.20032	-1.88156	Btbd3	BTB domain containing 3	0.271391
1391618_at	0.000549	4.62e-05	-8.82	2.1039	-1.88142	Kifap3	kinesin-associated protein 3	0.271416
1372335_at	0.000136	4.67e-06	-12.4	4.63855	-1.88108	Reep2	receptor accessory protein 2	0.27148
1393167_at	0.00996	0.00234	-4.63	-2.24554	-1.881			0.271496
1376919_at	0.000871	9.25e-05	-7.92	1.33183	-1.88011	Mfsd6	major facilitator superfamily domain containing 6	0.271662
1384316_at	0.00399	0.000748	-5.65	-0.988822	-1.87982			0.271718
1388907_at	7.93e-05	1.76e-06	-14.3	5.70226	-1.87975	Necap1	NECAP endocytosis associated 1	0.27173
1393044_at	5.69e-05	9.99e-07	-15.6	6.31943	-1.87854	Cmpk2	cytidine/uridine monophosphate kinase 2	0.271958
1398640_at	0.000103	2.71e-06	-13.5	5.2346	-1.87828	Rab30	RAB30, member RAS oncogene family	0.272008
1384166_a_at	0.00355	0.000643	-5.8	-0.820288	-1.87654	Lysmd4	LysM domain containing 4	0.272336
1370558_a_at	0.0131	0.00328	-4.35	-2.61551	-1.87608	Kcnc2	potassium voltage-gated channel subfamily C member 2	0.272422
1398500_at	0.000747	7.39e-05	-8.2	1.5805	-1.87534	Adgrf5	adhesion G protein-coupled receptor F5	0.272563
1398649_at	0.0183	0.00496	-4.02	-3.06531	-1.87498	Slitrk3	SLIT and NTRK-like family, member 3	0.27263
1378359_at	0.000306	1.79e-05	-10.2	3.15455	-1.87452	LOC100910054	NF-kappa-B-repressing factor-like	0.272718
1395415_at	0.000705	6.77e-05	-8.32	1.67864	-1.87361	Tcaf1	TRPM8 channel-associated factor 1	0.27289
1373636_at	0.0095	0.0022	-4.68	-2.17988	-1.87158	Spock1	sparc/osteonectin, cwcv and kazal-like domains proteoglycan (testican) 1	0.273274
1379907_at	0.0238	0.00683	-3.77	-3.41285	-1.87157	Hpcal4	hippocalcin-like 4	0.273276
1372434_at	1.01e-05	5.44e-08	-23.7	9.38598	-1.87099			0.273387
1391911_at	0.0012	0.000147	-7.37	0.816753	-1.86982	LOC102553820	uncharacterized LOC102553820	0.273608
1392013_at	0.000506	4.08e-05	-8.99	2.24113	-1.86971			0.273629
1369212_s_at	0.000127	4.03e-06	-12.7	4.79918	-1.86943	Epb41l1	erythrocyte membrane protein band 4.1-like 1	0.273681
1379517_at	0.00116	0.000139	-7.43	0.878088	-1.86753	Rgs6	regulator of G-protein signaling 6	0.274042
1379126_at	0.00019	8.3e-06	-11.4	4.00422	-1.86638	Prune2	prune homolog 2	0.274261
1372925_at	1.48e-05	1.04e-07	-21.6	8.72162	-1.86469	Sirt3	sirtuin 3	0.274583
1396403_at	0.000436	3.19e-05	-9.33	2.51486	-1.86416	RGD1311595	similar to KIAA2026 protein	0.274683
1382981_at	0.0024	0.000382	-6.32	-0.244322	-1.86406	Ahi1	Abelson helper integration site 1	0.274702
1372297_at	0.00789	0.00176	-4.87	-1.93259	-1.86321	Gsta4	glutathione S-transferase alpha 4	0.274865
1383955_at	0.00203	0.000305	-6.56	0.004658	-1.86264	LOC102555819///LOC102555756	uncharacterized LOC102555819///uncharacterized LOC102555756	0.274973
1372539_at	0.00158	0.000215	-6.94	0.395181	-1.86032			0.275415
1370571_at	0.00156	0.000212	-6.95	0.409989	-1.85905	Slco3a1	solute carrier organic anion transporter family, member 3a1	0.275657
1393220_at	0.000735	7.21e-05	-8.23	1.60815	-1.85878	Armc8	armadillo repeat containing 8	0.275708
1391459_at	0.00141	0.000184	-7.11	0.568504	-1.85842	Nudt11	nudix hydrolase 11	0.275779
1389307_at	0.00204	0.000308	-6.55	-0.00515	-1.85577	Aplp1	amyloid beta precursor like protein 1	0.276285
1388670_at	0.000506	4.09e-05	-8.98	2.2375	-1.85506			0.276422
1385534_at	0.00185	0.000269	-6.69	0.146839	-1.85481	Bex3	brain expressed X-linked 3	0.27647
1383934_at	0.0013	0.000165	-7.24	0.688861	-1.85437	LOC102555520	uncharacterized LOC102555520	0.276553
1370341_at	4.61e-05	6.92e-07	-16.4	6.71515	-1.85352	LOC100911625///Eno2	gamma-enolase-like///enolase 2, gamma, neuronal	0.276716
1383263_at	0.133	0.0533	-2.32	-5.57794	-1.85189	LOC100910855///Ogn	mimecan-like///osteoglycin	0.27703
1387406_at	0.00932	0.00215	-4.7	-2.15386	-1.85106	RGD1561897///Uhmk1	similar to Serine/threonine-protein kinase Kist (Kinase interacting with stathmin)///U2AF homology motif (UHM) kinase 1	0.277189
1393181_at	0.0175	0.00471	-4.06	-3.009	-1.85092	Nfasc	neurofascin	0.277216
1398354_at	0.000868	9.2e-05	-7.93	1.33757	-1.8509	Ctnnal1	catenin alpha-like 1	0.27722
1378320_at	0.00488	0.000964	-5.41	-1.2692	-1.84789	Rlbp1	retinaldehyde binding protein 1	0.277798
1369953_a_at	0.00191	0.000282	-6.64	0.091342	-1.847	Cd24	CD24 molecule	0.27797
1393099_at	0.000551	4.64e-05	-8.81	2.09725	-1.84683	Cox11	COX11 cytochrome c oxidase copper chaperone	0.278003
1371804_at	0.00608	0.00127	-5.16	-1.57145	-1.84606	Cdadc1	cytidine and dCMP deaminase domain containing 1	0.278152
1384655_at	0.00104	0.000118	-7.63	1.05968	-1.84541	Kirrel3	kin of IRRE like 3 (Drosophila)	0.278277
1382429_at	0.013	0.00326	-4.36	-2.6072	-1.8446			0.278433
1387903_at	0.00015	5.63e-06	-12.1	4.43245	-1.84438	Pja2	praja ring finger ubiquitin ligase 2	0.278476
1376141_at	0.0032	0.000559	-5.94	-0.665497	-1.84288			0.278765
1395590_at	0.0053	0.00107	-5.32	-1.38355	-1.84011	LOC102549278	zinc finger CCCH-type antiviral protein 1-like	0.2793
1374553_at	0.00339	0.000603	-5.86	-0.749994	-1.84005	Fam32a	family with sequence similarity 32, member A	0.279313
1398521_at	0.00337	0.000599	-5.87	-0.743301	-1.83999			0.279324
1396337_at	0.00656	0.0014	-5.07	-1.68152	-1.83984			0.279353
1375940_a_at	0.000111	3.1e-06	-13.2	5.0862	-1.83973	Kctd17	potassium channel tetramerization domain containing 17	0.279374
1390990_at	0.00114	0.000135	-7.46	0.907902	-1.83943			0.279433
1388593_at	0.00141	0.000184	-7.11	0.568748	-1.83931			0.279456
1372065_at	0.00525	0.00106	-5.33	-1.37014	-1.83883	Art3	ADP-ribosyltransferase 3	0.279548
1369827_at	0.000228	1.09e-05	-11	3.6993	-1.83494	Clstn3	calsyntenin 3	0.280302
1395745_at	0.00532	0.00108	-5.31	-1.38924	-1.83438			0.280412
1378817_at	0.00175	0.00025	-6.77	0.227538	-1.83427	Itsn1	intersectin 1	0.280433
1372586_at	0.000244	1.21e-05	-10.8	3.58724	-1.83217			0.280842
1391348_at	0.000816	8.42e-05	-8.04	1.43633	-1.83158	Pank3	pantothenate kinase 3	0.280956
1369358_a_at	0.00462	0.000897	-5.48	-1.18892	-1.83069	Hap1	huntingtin-associated protein 1	0.28113
1372260_at	0.000423	3.05e-05	-9.4	2.56568	-1.83054	Rogdi	rogdi homolog	0.281159
1368506_at	1.36e-05	8.98e-08	-22	8.87252	-1.82989	Rgs4	regulator of G-protein signaling 4	0.281287
1367887_at	0.0144	0.00369	-4.26	-2.74448	-1.82971	Lcat	lecithin cholesterol acyltransferase	0.281321
1389437_at	0.00021	9.67e-06	-11.2	3.83594	-1.82958	Sall2	spalt-like transcription factor 2	0.281347
1387934_at	0.00322	0.000562	-5.93	-0.671941	-1.82928	LOC100910284///Bcan	brevican core protein-like///brevican	0.281405
1368097_a_at	0.00117	0.000142	-7.41	0.857679	-1.82928	Rtn1	reticulon 1	0.281406
1375294_at	0.000924	0.0001	-7.82	1.24052	-1.82896			0.281467
1367959_a_at	0.000666	6.21e-05	-8.43	1.77465	-1.82895	Scn1b	sodium voltage-gated channel beta subunit 1	0.28147
1392890_at	0.024	0.00692	-3.77	-3.42592	-1.82557	Pafah1b1	platelet-activating factor acetylhydrolase 1b, regulatory subunit 1	0.28213
1375278_at	0.000666	6.22e-05	-8.43	1.77359	-1.82532	Trim2	tripartite motif-containing 2	0.282178
1367707_at	0.0054	0.0011	-5.3	-1.4101	-1.82421	Fasn	fatty acid synthase	0.282396
1374939_at	0.00106	0.000121	-7.59	1.02863	-1.82413	Cyfip2	cytoplasmic FMR1 interacting protein 2	0.282412
1393174_at	0.00138	0.000177	-7.15	0.607525	-1.82392	Fam171b	family with sequence similarity 171, member B	0.282453
1376913_at	0.00814	0.00183	-4.84	-1.97431	-1.82351			0.282533
1380865_at	0.092	0.0345	-2.61	-5.13206	-1.82324			0.282586
1375720_at	0.00247	0.000399	-6.28	-0.290733	-1.82305	Gabbr1	gamma-aminobutyric acid type B receptor subunit 1	0.282624
1383499_at	0.000153	5.78e-06	-12	4.40389	-1.8224	Amigo1	adhesion molecule with Ig like domain 1	0.28275
1393793_at	0.00222	0.000347	-6.42	-0.135731	-1.82147			0.282933
1397523_at	0.00218	0.000339	-6.45	-0.109949	-1.82096	Lrp11	LDL receptor related protein 11	0.283032
1390597_at	0.00102	0.000116	-7.65	1.07819	-1.81751			0.28371
1393383_at	0.0249	0.00723	-3.73	-3.47341	-1.81605	Arhgdig	Rho GDP dissociation inhibitor gamma	0.283998
1378311_at	0.00136	0.000175	-7.17	0.623332	-1.81467			0.28427
1384277_at	0.00182	0.000263	-6.71	0.16933	-1.81293	Plekhh1	pleckstrin homology, MyTH4 and FERM domain containing H1	0.284612
1384188_at	0.0146	0.00377	-4.24	-2.76758	-1.8119	Crebrf	CREB3 regulatory factor	0.284816
1373350_at	0.0012	0.000146	-7.37	0.823017	-1.8113	Psip1	PC4 and SFRS1 interacting protein 1	0.284934
1371794_at	0.000478	3.75e-05	-9.1	2.33521	-1.81052	Zfp106	zinc finger protein 106	0.285089
1387078_at	0.00135	0.000172	-7.19	0.64333	-1.81012	Inpp4a	inositol polyphosphate-4-phosphatase type I A	0.285167
1397788_at	0.00344	0.000617	-5.84	-0.775987	-1.80996	Rimbp2	RIMS binding protein 2	0.285198
1372012_at	0.00234	0.00037	-6.35	-0.208825	-1.80922			0.285346
1374688_at	0.000291	1.64e-05	-10.3	3.25411	-1.80896			0.285397
1391559_at	0.00109	0.000128	-7.53	0.974368	-1.80882	Tlcd1	TLC domain containing 1	0.285425
1387091_at	0.00155	0.00021	-6.96	0.422309	-1.80758	Padi2	peptidyl arginine deiminase 2	0.285669
1392880_at	0.00434	0.000829	-5.56	-1.1024	-1.80716	Rab37	RAB37, member RAS oncogene family	0.285754
1389876_at	0.00472	0.000923	-5.46	-1.22026	-1.80642	Camk2n1	calcium/calmodulin-dependent protein kinase II inhibitor 1	0.2859
1396451_at	0.00963	0.00224	-4.67	-2.19708	-1.80456			0.286269
1379920_at	0.00453	0.000876	-5.5	-1.16357	-1.80445			0.28629
1392524_at	0.000893	9.56e-05	-7.88	1.29499	-1.80443	Trim23	tripartite motif-containing 23	0.286294
1398440_at	5.49e-05	9.21e-07	-15.8	6.40782	-1.80423	Pnisr	PNN interacting serine and arginine rich protein	0.286335
1378629_at	0.000981	0.000109	-7.72	1.14505	-1.80411	Satb1	SATB homeobox 1	0.286357
1370775_a_at	0.00643	0.00136	-5.1	-1.65177	-1.80313	Calca	calcitonin-related polypeptide alpha	0.286551
1370544_at	0.012	0.00295	-4.44	-2.49961	-1.80274	Eml2	echinoderm microtubule associated protein like 2	0.286629
1389456_at	0.00158	0.000216	-6.93	0.389584	-1.80221	Clock	clock circadian regulator	0.286734
1388522_at	0.00015	5.62e-06	-12.1	4.43356	-1.80203	Pptc7	PTC7 protein phosphatase homolog	0.28677
1381977_at	0.000202	9.09e-06	-11.3	3.90412	-1.80171	Rgmb	repulsive guidance molecule family member B	0.286834
1382235_at	0.00129	0.000163	-7.25	0.702846	-1.80157	Nadk2	NAD kinase 2, mitochondrial	0.286863
1395148_at	0.0143	0.00367	-4.26	-2.73847	-1.80102			0.286972
1381465_at	0.0154	0.004	-4.19	-2.83134	-1.80089	Tmem229a	transmembrane protein 229A	0.286998
1379590_at	0.0014	0.000182	-7.12	0.580671	-1.80058	Zrsr1	zinc finger (CCCH type), RNA binding motif and serine/arginine rich 1	0.287059
1377738_a_at	0.00441	0.000846	-5.54	-1.12437	-1.80048	Cyhr1	cysteine and histidine rich 1	0.287079
1393058_at	0.000425	3.06e-05	-9.39	2.55983	-1.80004	Eid2	EP300 interacting inhibitor of differentiation 2	0.287166
1369373_at	0.02	0.00555	-3.93	-3.18791	-1.79947	Fgfr3	fibroblast growth factor receptor 3	0.28728
1382100_at	0.000555	4.71e-05	-8.79	2.08238	-1.79929	Fam188a	family with sequence similarity 188, member A	0.287316
1372359_at	0.00782	0.00174	-4.88	-1.91938	-1.79819	LOC501718///Dusp26	similar to dual specificity phosphatase 26///dual specificity phosphatase 26 (putative)	0.287535
1378871_at	0.00469	0.000915	-5.46	-1.21053	-1.79812	Adgrb2	adhesion G protein-coupled receptor B2	0.287549
1372980_at	0.00251	0.000406	-6.26	-0.310968	-1.79776	Tspan33	tetraspanin 33	0.28762
1380938_at	0.00435	0.000833	-5.55	-1.10672	-1.79727	Dstyk	dual serine/threonine and tyrosine protein kinase	0.287719
1385103_at	0.00356	0.000646	-5.8	-0.82568	-1.79543	Aktip	AKT interacting protein	0.288085
1397326_at	0.00615	0.00129	-5.15	-1.58967	-1.79543			0.288086
1381074_at	0.0172	0.00459	-4.08	-2.98062	-1.79496	Cyp2j3	cytochrome P450, family 2, subfamily j, polypeptide 3	0.288179
1371140_a_at	0.000278	1.5e-05	-10.5	3.35289	-1.79243	Asic2	acid sensing ion channel subunit 2	0.288686
1374275_at	0.0154	0.00402	-4.19	-2.83765	-1.79176	Car11	carbonic anhydrase 11	0.28882
1378355_a_at	0.00821	0.00185	-4.83	-1.98593	-1.79075	Slc24a4	solute carrier family 24 member 4	0.289022
1377649_at	0.000425	3.07e-05	-9.39	2.5578	-1.79029			0.289113
1377652_at	0.00211	0.000323	-6.5	-0.05702	-1.79024			0.289123
1384716_at	0.000101	2.6e-06	-13.5	5.27859	-1.78977	Syt1	synaptotagmin 1	0.289218
1372103_at	0.0012	0.000148	-7.36	0.811002	-1.78973			0.289226
1383805_at	0.0131	0.00329	-4.35	-2.61693	-1.78802	Tnik	TRAF2 and NCK interacting kinase	0.28957
1373378_at	0.000154	5.87e-06	-12	4.38564	-1.78737	Agtpbp1	ATP/GTP binding protein 1	0.2897
1385881_at	0.000368	2.4e-05	-9.74	2.83078	-1.78605	Gatsl2	GATS protein-like 2	0.289966
1382131_at	0.000959	0.000106	-7.76	1.18555	-1.7848			0.290217
1395379_at	0.00457	0.000887	-5.49	-1.17683	-1.78474	Zrsr2	zinc finger (CCCH type), RNA binding motif and serine/arginine rich 2	0.290229
1384309_at	0.00104	0.000118	-7.63	1.06087	-1.78388			0.290402
1379971_at	0.00287	0.000485	-6.08	-0.50748	-1.78288	Zc3h6	zinc finger CCCH type containing 6	0.290603
1387929_at	0.000686	6.51e-05	-8.37	1.72287	-1.78252	Pmf31	PMF32 protein	0.290675
1391855_at	0.000857	9.04e-05	-7.95	1.35784	-1.78087	Bcl7a	BCL tumor suppressor 7A	0.291007
1383783_at	0.00446	0.000858	-5.52	-1.14049	-1.7796	Pcdh9	protocadherin 9	0.291264
1378298_at	0.00378	0.000697	-5.72	-0.909669	-1.77919	Igsf21	immunoglobin superfamily, member 21	0.291347
1378007_at	0.000125	3.86e-06	-12.8	4.84524	-1.77902	RGD1306148	similar to KIAA0368	0.291381
1378194_a_at	0.00401	0.000751	-5.65	-0.992858	-1.77886	Rufy3	RUN and FYVE domain containing 3	0.291413
1393274_at	0.000675	6.36e-05	-8.4	1.74853	-1.7788	Ndufaf7	NADH:ubiquinone oxidoreductase complex assembly factor 7	0.291425
1372692_at	0.000395	2.71e-05	-9.56	2.69537	-1.77847	Tnk2	tyrosine kinase, non-receptor, 2	0.291493
1395471_at	0.0045	0.000869	-5.51	-1.15433	-1.77765	Ankrd45	ankyrin repeat domain 45	0.291659
1380174_at	0.000216	1.01e-05	-11.1	3.79119	-1.77568			0.292056
1378345_at	8.85e-05	2.1e-06	-14	5.51253	-1.77458			0.292279
1398445_at	0.00218	0.000338	-6.45	-0.10712	-1.77426			0.292345
1390301_at	0.000163	6.51e-06	-11.8	4.27266	-1.77408			0.29238
1393901_at	0.000859	9.06e-05	-7.95	1.35435	-1.77371	Runx1t1	RUNX1 translocation partner 1	0.292455
1387182_at	0.00282	0.000472	-6.1	-0.479119	-1.77236	Gpr37	G protein-coupled receptor 37	0.29273
1370999_at	0.000407	2.87e-05	-9.48	2.63273	-1.77195	Spag5	sperm associated antigen 5	0.292812
1395389_at	0.0273	0.00804	-3.65	-3.58926	-1.77128	LOC102557177	uncharacterized LOC102557177	0.292948
1387874_at	4.38e-05	6.34e-07	-16.6	6.80939	-1.77112	Dbp	D-box binding PAR bZIP transcription factor	0.29298
1381915_at	0.000145	5.22e-06	-12.2	4.51504	-1.77075	RGD1305938	similar to expressed sequence AW549877	0.293057
1391906_at	0.000495	3.95e-05	-9.03	2.27637	-1.77037	Apitd1///Pgd///Kif1b///Cort	apoptosis-inducing, TAF9-like domain 1///phosphogluconate dehydrogenase///kinesin family member 1B///cortistatin	0.293134
1392619_at	0.000829	8.63e-05	-8.01	1.40866	-1.76935	Ebf1	early B-cell factor 1	0.293342
1387127_at	0.00247	0.000397	-6.28	-0.287194	-1.76822	Atrn	attractin	0.29357
1395836_at	0.000193	8.53e-06	-11.4	3.97475	-1.76799			0.293618
1385124_at	0.00076	7.59e-05	-8.17	1.55115	-1.76768	Trib2	tribbles pseudokinase 2	0.29368
1384468_at	0.000829	8.63e-05	-8.01	1.40848	-1.76756			0.293705
1384056_at	0.00985	0.00231	-4.64	-2.22979	-1.76699	Fgfr3	fibroblast growth factor receptor 3	0.293821
1388819_at	0.000828	8.62e-05	-8.01	1.40979	-1.76686	Scamp1	secretory carrier membrane protein 1	0.293847
1383402_at	0.00147	0.000195	-7.05	0.504178	-1.76529			0.294168
1388688_at	0.000565	4.82e-05	-8.76	2.05599	-1.76469	Ccser2	coiled-coil serine-rich protein 2	0.294289
1379500_at	0.00546	0.00111	-5.28	-1.42467	-1.76429	Ccdc117	coiled-coil domain containing 117	0.294371
1377145_at	0.0976	0.037	-2.57	-5.20293	-1.76297	Adgrv1	adhesion G protein-coupled receptor V1	0.294641
1369065_a_at	0.000257	1.32e-05	-10.7	3.49214	-1.76224	Atp2a2	ATPase sarcoplasmic/endoplasmic reticulum Ca2+ transporting 2	0.294791
1370500_a_at	0.00697	0.00151	-5.01	-1.76541	-1.76101	Mobp	myelin-associated oligodendrocyte basic protein	0.295042
1385950_at	0.00344	0.000616	-5.84	-0.773169	-1.759	Fam131b	family with sequence similarity 131, member B	0.295453
1379564_at	0.00435	0.000831	-5.55	-1.10463	-1.75899	Anks1b	ankyrin repeat and sterile alpha motif domain containing 1B	0.295454
1393813_at	0.000263	1.38e-05	-10.6	3.44639	-1.75822	Ttc3	tetratricopeptide repeat domain 3	0.295612
1370430_at	0.000689	6.55e-05	-8.36	1.71538	-1.75696	LOC102556832///Lmo3	LIM domain only protein 3-like///LIM domain only 3	0.29587
1370873_at	9.62e-05	2.43e-06	-13.7	5.35251	-1.75627	Calm2///Calm3///Calm1	calmodulin 2///calmodulin 3///calmodulin 1	0.296012
1383981_at	0.000217	1.02e-05	-11.1	3.77758	-1.75524	Tp53bp2	tumor protein p53 binding protein, 2	0.296223
1389101_at	5.69e-05	9.95e-07	-15.6	6.3238	-1.75474	Ccnc	cyclin C	0.296326
1372847_at	0.000111	3.12e-06	-13.2	5.0792	-1.75436	Sdhaf3	succinate dehydrogenase complex assembly factor 3	0.296404
1385246_at	0.0011	0.000129	-7.52	0.963755	-1.75416			0.296445
1386379_at	0.00522	0.00105	-5.34	-1.35971	-1.752	Atp8a1	ATPase phospholipid transporting 8A1	0.29689
1379872_at	0.00135	0.000173	-7.18	0.6344	-1.75111	Fam19a2	family with sequence similarity 19 member A2, C-C motif chemokine like	0.297073
1393231_at	0.000295	1.67e-05	-10.3	3.23349	-1.74747	Ppp4r2	protein phosphatase 4, regulatory subunit 2	0.297823
1379140_at	0.000299	1.71e-05	-10.3	3.2085	-1.74704	LOC100362814	hypothetical protein LOC100362814	0.297912
1389084_at	0.0402	0.0129	-3.3	-4.09563	-1.74604	LOC100912167	uncharacterized LOC100912167	0.29812
1377216_at	0.00171	0.000241	-6.81	0.267667	-1.74566			0.298197
1375674_at	0.00126	0.000157	-7.3	0.747073	-1.74521	Cdip1	cell death-inducing p53 target 1	0.29829
1368814_at	0.0047	0.000919	-5.46	-1.21628	-1.74506	Aldh6a1	aldehyde dehydrogenase 6 family, member A1	0.298322
1386296_at	0.000259	1.33e-05	-10.6	3.48086	-1.74422	2018-09-08	septin 8	0.298495
1386080_at	0.00194	0.000287	-6.62	0.072623	-1.74406	Hey1	hes-related family bHLH transcription factor with YRPW motif 1	0.298528
1371018_at	0.00185	0.00027	-6.69	0.141238	-1.7437	Celsr2	cadherin, EGF LAG seven-pass G-type receptor 2	0.298602
1392551_at	0.00456	0.000884	-5.5	-1.17247	-1.74352			0.298641
1398411_at	0.0041	0.000773	-5.62	-1.0252	-1.74297			0.298755
1398486_at	0.00482	0.000948	-5.43	-1.25048	-1.74263	Mia3	MIA family member 3, ER export factor	0.298824
1393897_at	0.0122	0.00302	-4.42	-2.52609	-1.74085	Cdh20	cadherin 20	0.299193
1384153_at	0.00229	0.000359	-6.38	-0.176051	-1.74012	Jakmip2	janus kinase and microtubule interacting protein 2	0.299345
1381605_at	0.000171	7.1e-06	-11.7	4.17584	-1.73945	Usp13	ubiquitin specific peptidase 13	0.299483
1393382_at	0.000827	8.6e-05	-8.01	1.41233	-1.73856	RGD1566386	similar to Hypothetical protein A430033K04	0.29967
1378457_at	0.0018	0.000259	-6.73	0.186219	-1.73765	Thrb	thyroid hormone receptor beta	0.299857
1381001_at	0.00589	0.00122	-5.2	-1.52924	-1.73757			0.299874
1390104_at	0.000458	3.48e-05	-9.21	2.41844	-1.73749	Irgq	immunity-related GTPase Q	0.299891
1375851_at	0.000442	3.27e-05	-9.3	2.48834	-1.73665	Klhl8	kelch-like family member 8	0.300066
1389613_at	0.00158	0.000216	-6.93	0.390573	-1.73651	Atp8a1	ATPase phospholipid transporting 8A1	0.300095
1391757_at	0.00108	0.000125	-7.56	0.998727	-1.73636	Ptpn4	protein tyrosine phosphatase, non-receptor type 4	0.300126
1372063_at	0.0017	0.000239	-6.82	0.274876	-1.73468			0.300476
1387850_at	0.0022	0.000342	-6.44	-0.120092	-1.73385	Tmeff1	transmembrane protein with EGF-like and two follistatin-like domains 1	0.300649
1371672_at	0.00692	0.0015	-5.02	-1.75491	-1.73331	Cbx7	chromobox 7	0.300761
1386817_at	0.0325	0.00994	-3.49	-3.81746	-1.73285	Cdk18	cyclin-dependent kinase 18	0.300856
1395307_at	0.00242	0.000388	-6.31	-0.261156	-1.73255	Anks1b	ankyrin repeat and sterile alpha motif domain containing 1B	0.30092
1377884_at	0.00127	0.00016	-7.27	0.724025	-1.73251			0.300929
1375030_at	0.00335	0.000595	-5.87	-0.73563	-1.73182	B3galt5	Beta-1,3-galactosyltransferase 5	0.301073
1387938_at	0.00695	0.00151	-5.01	-1.76117	-1.73134	Baalc	brain and acute leukemia, cytoplasmic	0.301172
1377788_at	0.00312	0.000541	-5.97	-0.629289	-1.72542	Cap2	CAP, adenylate cyclase-associated protein, 2 (yeast)	0.302411
1383638_at	0.000635	5.77e-05	-8.52	1.85671	-1.72516			0.302464
1369960_at	0.00209	0.000319	-6.51	-0.043867	-1.72433	Fxyd1	FXYD domain-containing ion transport regulator 1	0.302639
1383826_at	0.000923	0.0001	-7.82	1.24204	-1.72419	Rab40b	Rab40b, member RAS oncogene family	0.302669
1380023_at	9.62e-05	2.43e-06	-13.7	5.35278	-1.72415	Senp2	Sumo1/sentrin/SMT3 specific peptidase 2	0.302676
1389706_at	0.000353	2.23e-05	-9.85	2.90916	-1.72331	Dclk1	doublecortin-like kinase 1	0.302854
1367885_at	0.00656	0.0014	-5.08	-1.68067	-1.72323	Pxmp2	peroxisomal membrane protein 2	0.302869
1377091_at	0.00288	0.000486	-6.07	-0.511808	-1.72159	Prrt1	proline-rich transmembrane protein 1	0.303215
1371702_at	0.000985	0.00011	-7.71	1.14027	-1.72087	Tspan7	tetraspanin 7	0.303365
1388879_at	0.0265	0.00778	-3.68	-3.55346	-1.72032	Abi3bp	ABI family member 3 binding protein	0.303481
1382510_at	0.00409	0.00077	-5.63	-1.02092	-1.71885			0.30379
1380385_at	0.00069	6.58e-05	-8.35	1.71013	-1.71836	Ccdc136	coiled-coil domain containing 136	0.303895
1373912_at	0.000585	5.1e-05	-8.69	1.99352	-1.71719	Enpp4	ectonucleotide pyrophosphatase/phosphodiesterase 4	0.304141
1392944_at	0.000156	6.08e-06	-12	4.34764	-1.71617	Tln2	talin 2	0.304356
1394456_at	0.000689	6.56e-05	-8.36	1.71338	-1.71525	Thrb	thyroid hormone receptor beta	0.304549
1389654_at	0.00625	0.00132	-5.13	-1.61353	-1.71469	Pls1	plastin 1	0.304669
1374482_at	0.0064	0.00136	-5.1	-1.64545	-1.71333	Ctps2	CTP synthase 2	0.304956
1377332_at	0.113	0.044	-2.45	-5.38201	-1.71249			0.305133
1397731_at	0.000439	3.22e-05	-9.32	2.50286	-1.71208			0.30522
1374298_at	0.0108	0.00259	-4.55	-2.35613	-1.71113			0.305421
1380120_at	0.00567	0.00117	-5.24	-1.48022	-1.71064	LOC102551251	putative methyl-CpG-binding domain protein 3-like 5-like	0.305525
1383861_at	0.00546	0.00111	-5.28	-1.42648	-1.70933			0.305803
1384943_at	0.00257	0.000419	-6.23	-0.346958	-1.70906	RGD1563888	similar to DNA segment, Chr 16, ERATO Doi 472, expressed	0.30586
1388295_s_at	0.000398	2.74e-05	-9.55	2.68178	-1.70798	Frs3	fibroblast growth factor receptor substrate 3	0.306088
1390792_a_at	0.00396	0.00074	-5.66	-0.97597	-1.70796			0.306093
1385585_at	0.00885	0.00202	-4.75	-2.08557	-1.70684	Hlf	HLF, PAR bZIP transcription factor	0.306331
1393547_at	0.00268	0.000443	-6.17	-0.407524	-1.70634	Rnf182	ring finger protein 182	0.306437
1393565_at	0.000318	1.9e-05	-10.1	3.0872	-1.70335	RGD1563441	similar to RIKEN cDNA A030009H04	0.307073
1394057_at	0.00132	0.000168	-7.22	0.671164	-1.70278	LOC100909913///Ndp	norrin-like///NDP, norrin cystine knot growth factor	0.307195
1378755_at	0.000419	3e-05	-9.42	2.58339	-1.70195	Fndc10	fibronectin type III domain containing 10	0.307369
1397772_at	0.00234	0.000371	-6.35	-0.210166	-1.70193	Paqr8	progestin and adipoQ receptor family member 8	0.307374
1387962_at	0.00205	0.00031	-6.54	-0.012679	-1.70189	Zfp180	zinc finger protein 180	0.307382
1383298_at	0.00967	0.00225	-4.66	-2.20378	-1.70189	Endod1	endonuclease domain containing 1	0.307384
1388034_at	0.000741	7.3e-05	-8.22	1.59531	-1.70187	Apitd1///Pgd///Kif1b///Cort	apoptosis-inducing, TAF9-like domain 1///phosphogluconate dehydrogenase///kinesin family member 1B///cortistatin	0.307388
1379272_at	0.0194	0.00535	-3.96	-3.14804	-1.70034	Paip1	poly(A) binding protein interacting protein 1	0.307713
1368902_at	0.00439	0.000842	-5.54	-1.1194	-1.69935	Pak3	p21 (RAC1) activated kinase 3	0.307926
1379594_at	0.0115	0.00281	-4.48	-2.4438	-1.69889			0.308022
1372825_at	0.00259	0.000423	-6.22	-0.356771	-1.69752	Fnbp1	formin binding protein 1	0.308316
1375944_at	0.00388	0.00072	-5.69	-0.945847	-1.69701	Acss2	acyl-CoA synthetase short-chain family member 2	0.308425
1370584_a_at	0.0199	0.00549	-3.94	-3.17615	-1.69689	Adora1	adenosine A1 receptor	0.30845
1379932_at	0.02	0.00554	-3.94	-3.18478	-1.69653	Clcn4	chloride voltage-gated channel 4	0.308528
1383510_at	0.368	0.185	-1.47	-6.77867	-1.69534	LOC102548730	uncharacterized LOC102548730	0.308783
1377331_at	0.000336	2.06e-05	-9.97	2.99851	-1.6945			0.308962
1375943_at	0.00304	0.000522	-6.01	-0.589144	-1.69358	Ccp110	centriolar coiled-coil protein 110	0.309158
1373278_at	0.00159	0.000218	-6.92	0.380048	-1.6932	Nfe2l1	nuclear factor, erythroid 2-like 1	0.309241
1368174_at	0.00039	2.65e-05	-9.6	2.7197	-1.69078	Egln3	egl-9 family hypoxia-inducible factor 3	0.30976
1367814_at	3.73e-05	4.79e-07	-17.3	7.10971	-1.68994	Atp1b1	ATPase Na+/K+ transporting subunit beta 1	0.309939
1380471_at	0.00345	0.00062	-5.84	-0.780169	-1.68916			0.310108
1390943_at	0.00304	0.000521	-6.01	-0.588917	-1.68882	Rsrp1	arginine and serine rich protein 1	0.31018
1368858_at	0.00908	0.00209	-4.73	-2.12093	-1.68863	Ugt8	UDP glycosyltransferase 8	0.310222
1391405_at	6.72e-05	1.35e-06	-14.9	5.99237	-1.68767	Thsd7a	thrombospondin type 1 domain containing 7A	0.310428
1377393_at	0.00149	0.000199	-7.02	0.477572	-1.68655	Frmd5	FERM domain containing 5	0.310669
1393600_at	0.000887	9.47e-05	-7.89	1.30564	-1.6863			0.310722
1386889_at	0.000261	1.35e-05	-10.6	3.46622	-1.68594	Scd2	stearoyl-Coenzyme A desaturase 2	0.310801
1369691_at	0.103	0.0396	-2.52	-5.27506	-1.68519	Scn3a	sodium voltage-gated channel alpha subunit 3	0.310963
1388451_at	0.00366	0.000669	-5.76	-0.864681	-1.68434			0.311144
1373165_at	0.00258	0.000421	-6.22	-0.350504	-1.68239	Zmat1	zinc finger, matrin-type 1	0.311565
1397516_at	0.00119	0.000144	-7.39	0.840296	-1.68131	Alg2	ALG2, alpha-1,3/1,6-mannosyltransferase	0.311799
1377975_at	0.0016	0.00022	-6.91	0.369263	-1.68017			0.312045
1370328_at	0.0477	0.0158	-3.16	-4.31188	-1.68016	Dkk3	dickkopf WNT signaling pathway inhibitor 3	0.312048
1384675_at	0.00859	0.00195	-4.79	-2.04642	-1.6788	Apeg3	antisense paternally expressed gene 3	0.312343
1387803_at	0.00109	0.000128	-7.53	0.974328	-1.67866	Ppp2r2b	protein phosphatase 2, regulatory subunit B, beta	0.312373
1393589_at	0.0258	0.00753	-3.7	-3.51749	-1.6784	Klhl4	kelch-like family member 4	0.312429
1393151_at	0.00135	0.000173	-7.18	0.634995	-1.67805	Etnk1	ethanolamine kinase 1	0.312506
1384571_at	0.000894	9.59e-05	-7.88	1.29189	-1.67761	Zswim5	zinc finger, SWIM-type containing 5	0.312601
1369839_at	0.000569	4.87e-05	-8.75	2.04436	-1.67688	LOC100910792///LOC100909679///Amph	amphiphysin-like///amphiphysin-like///amphiphysin	0.312758
1380308_at	0.0909	0.0341	-2.62	-5.11801	-1.67633	LOC100909866	uncharacterized LOC100909866	0.312878
1376633_at	0.00285	0.00048	-6.09	-0.496234	-1.67613	RGD1566029	similar to mKIAA1644 protein	0.31292
1395534_at	0.00405	0.000761	-5.64	-1.00745	-1.67569	Rasl10b	RAS-like, family 10, member B	0.313016
1387782_at	0.000156	6.01e-06	-12	4.35925	-1.6754	Dynll2	dynein light chain LC8-type 2	0.313078
1373301_at	0.000122	3.63e-06	-12.9	4.91526	-1.67534	Ppp1r13b	protein phosphatase 1, regulatory subunit 13B	0.313091
1375221_at	0.00015	5.53e-06	-12.1	4.4525	-1.67512	Tmx4	thioredoxin-related transmembrane protein 4	0.313139
1377974_at	0.000335	2.06e-05	-9.97	3.0018	-1.67453			0.313269
1390486_at	0.00022	1.03e-05	-11	3.76095	-1.67117	Usp32	ubiquitin specific peptidase 32	0.313999
1368153_a_at	0.00092	9.98e-05	-7.83	1.24761	-1.67108	Nsmf	NMDA receptor synaptonuclear signaling and neuronal migration factor	0.314018
1391186_at	0.00663	0.00142	-5.06	-1.6953	-1.67037			0.314173
1392189_at	0.0247	0.00714	-3.74	-3.46002	-1.67028	Rfx4	regulatory factor X4	0.314192
1376630_at	0.00452	0.000873	-5.51	-1.15917	-1.67021	Tarsl2	threonyl-tRNA synthetase-like 2	0.314208
1388795_at	0.000853	8.98e-05	-7.96	1.36466	-1.66991	Tppp	tubulin polymerization promoting protein	0.314272
1379103_at	0.00494	0.00098	-5.4	-1.28653	-1.66964			0.314332
1373177_x_at	0.00159	0.000217	-6.93	0.384388	-1.66855	LOC102556974///LOC102552540///LOC102551188///LOC684084///LOC683963///LOC679711	uncharacterized LOC102556974///uncharacterized LOC102552540///reticulocyte-binding protein 3-like///hypothetical protein LOC684084///hypothetical protein LOC683963///similar to RIKEN cDNA 5031410I06	0.314569
1394738_at	0.00569	0.00117	-5.24	-1.48404	-1.66841			0.314599
1377513_at	0.0124	0.00306	-4.41	-2.538	-1.66745			0.314808
1392705_at	0.0113	0.00273	-4.5	-2.41466	-1.66709	Slc9a6	solute carrier family 9 member A6	0.314887
1374663_at	0.000462	3.53e-05	-9.19	2.40153	-1.66594			0.315138
1397599_at	0.0324	0.00989	-3.5	-3.81198	-1.66463			0.315424
1383305_at	0.000138	4.84e-06	-12.4	4.59932	-1.66309			0.315762
1369192_at	0.0715	0.0255	-2.82	-4.81771	-1.66283	Cdkn1b	cyclin-dependent kinase inhibitor 1B	0.315819
1370334_at	0.000506	4.09e-05	-8.98	2.23762	-1.66055	Plekhb1	pleckstrin homology domain containing B1	0.316318
1385350_at	0.000148	5.4e-06	-12.2	4.4774	-1.65963			0.31652
1373584_at	0.00224	0.000351	-6.41	-0.15003	-1.6581	Mb21d2	Mab-21 domain containing 2	0.316856
1369860_a_at	0.062	0.0216	-2.94	-4.64326	-1.65798	Htr2c	5-hydroxytryptamine receptor 2C	0.316882
1397915_at	0.00228	0.000358	-6.39	-0.171579	-1.65699			0.317101
1387286_at	7.39e-05	1.55e-06	-14.6	5.84028	-1.65615	Grm1	glutamate receptor, metabotropic 1	0.317285
1368443_at	0.0171	0.00457	-4.09	-2.97741	-1.65335	Necab2	N-terminal EF-hand calcium binding protein 2	0.317901
1384308_at	0.00386	0.000717	-5.69	-0.940802	-1.65057	Meis1	Meis homeobox 1	0.318513
1393821_at	0.0352	0.011	-3.42	-3.92157	-1.65025	Nkain3	Na+/K+ transporting ATPase interacting 3	0.318585
1374004_at	0.00154	0.000208	-6.97	0.430537	-1.64983	Prepl	prolyl endopeptidase-like	0.318678
1393615_at	0.0198	0.00546	-3.95	-3.17014	-1.64982	Deptor	DEP domain containing MTOR-interacting protein	0.31868
1382451_at	0.0825	0.0303	-2.7	-4.99671	-1.64959	Hebp2	heme binding protein 2	0.318731
1398520_at	0.000382	2.53e-05	-9.66	2.77242	-1.64933	Plekhd1	pleckstrin homology and coiled-coil domain containing D1	0.318787
1382967_at	0.00436	0.000836	-5.55	-1.11106	-1.64808	Adgrg2	adhesion G protein-coupled receptor G2	0.319064
1390942_at	0.0038	0.000702	-5.71	-0.917648	-1.64615	Peli2	pellino E3 ubiquitin protein ligase family member 2	0.319491
1370541_at	0.00146	0.000194	-7.05	0.508605	-1.64614	Nr1d2	nuclear receptor subfamily 1, group D, member 2	0.319493
1392883_at	0.00206	0.000313	-6.53	-0.021845	-1.64545	Limch1	LIM and calponin homology domains 1	0.319646
1393478_at	2.21e-05	2.07e-07	-19.5	7.99911	-1.64214			0.320381
1389066_at	0.00556	0.00114	-5.26	-1.45169	-1.64184	Rcan2	regulator of calcineurin 2	0.320447
1377917_at	0.0105	0.00251	-4.57	-2.32014	-1.6416			0.320502
1382313_at	0.00247	0.000396	-6.28	-0.285074	-1.64067			0.320707
1376967_at	0.000996	0.000112	-7.69	1.12217	-1.63784			0.321338
1389618_at	0.0107	0.00255	-4.56	-2.3375	-1.63767			0.321375
1379824_at	0.000625	5.63e-05	-8.56	1.88425	-1.63634	Tox	thymocyte selection-associated high mobility group box	0.321671
1399037_at	0.000433	3.15e-05	-9.35	2.5276	-1.6358	Ttc19	tetratricopeptide repeat domain 19	0.321792
1374649_at	0.0155	0.00404	-4.18	-2.84362	-1.63503	Rasgrp2	RAS guanyl releasing protein 2	0.321963
1397364_at	0.0461	0.0152	-3.19	-4.27004	-1.63464			0.322051
1389728_at	0.00267	0.00044	-6.18	-0.399997	-1.63451	Meis2	Meis homeobox 2	0.322079
1368081_at	0.0013	0.000164	-7.24	0.6944	-1.6326	Abca2	ATP binding cassette subfamily A member 2	0.322506
1371877_at	0.000597	5.26e-05	-8.65	1.96006	-1.6324	LOC102553347///Dexi	uncharacterized LOC102553347///dexamethasone-induced transcript	0.322552
1371541_at	0.0201	0.00557	-3.93	-3.19164	-1.63189	Mylk	myosin light chain kinase	0.322665
1393636_at	8.91e-06	4.53e-08	-24.3	9.57228	-1.63184			0.322676
1390655_at	0.001	0.000113	-7.68	1.10923	-1.63138	Apeg3	antisense paternally expressed gene 3	0.32278
1389093_at	0.00613	0.00128	-5.15	-1.58332	-1.63134	Pak1	p21 (RAC1) activated kinase 1	0.322788
1381185_at	0.000436	3.18e-05	-9.33	2.51738	-1.63134	Nfatc2	nuclear factor of activated T-cells 2	0.322788
1390936_at	0.00941	0.00218	-4.69	-2.16767	-1.63074			0.322922
1377309_at	0.00208	0.000317	-6.52	-0.035763	-1.63027			0.323027
1374049_at	0.00825	0.00186	-4.83	-1.99359	-1.6296	LOC100359980	myosin, light chain 6B, alkali, smooth muscle and non-muscle	0.323179
1390430_at	0.0017	0.000239	-6.82	0.277678	-1.62888	Nr1d2	nuclear receptor subfamily 1, group D, member 2	0.323339
1382812_at	0.0824	0.0302	-2.7	-4.99422	-1.62769	RGD1310429	similar to Protein Njmu-R1	0.323607
1394436_at	0.000855	9.01e-05	-7.96	1.36125	-1.62737	Spag9	sperm associated antigen 9	0.323677
1372763_at	2.9e-05	3.16e-07	-18.4	7.55368	-1.6269	Nus1	NUS1 dehydrodolichyl diphosphate synthase subunit	0.323784
1374703_at	0.000145	5.21e-06	-12.2	4.51689	-1.62634	Cbx6	chromobox 6	0.323909
1384320_at	0.0134	0.00337	-4.33	-2.64609	-1.62596	Adgrb3	adhesion G protein-coupled receptor B3	0.323994
1381655_at	0.0242	0.00699	-3.76	-3.43704	-1.62593			0.324002
1369407_at	0.0258	0.00753	-3.7	-3.51792	-1.62364	Tnfrsf11b	TNF receptor superfamily member 11B	0.324515
1382469_at	0.024	0.00692	-3.76	-3.42604	-1.62259			0.324753
1380675_s_at	0.0389	0.0124	-3.33	-4.05153	-1.62258	Car11	carbonic anhydrase 11	0.324754
1371933_at	0.00512	0.00102	-5.36	-1.33418	-1.62016	Pde4dip	phosphodiesterase 4D interacting protein	0.325298
1381160_at	0.0307	0.0093	-3.54	-3.74596	-1.61925	Tmem200c	transmembrane protein 200C	0.325506
1375050_at	0.00465	0.000906	-5.47	-1.20041	-1.6183	Gprin1	G protein-regulated inducer of neurite outgrowth 1	0.325719
1378509_at	0.00092	9.98e-05	-7.83	1.24749	-1.61765	Kif3a	kinesin family member 3a	0.325866
1380272_at	0.000359	2.3e-05	-9.8	2.87713	-1.6167			0.326081
1382105_at	7.82e-05	1.73e-06	-14.4	5.72526	-1.61618	Gnb5	G protein subunit beta 5	0.326198
1374427_at	0.00358	0.000651	-5.79	-0.834652	-1.61614			0.326208
1372454_at	0.000736	7.23e-05	-8.23	1.6057	-1.61471	RGD1311899	similar to RIKEN cDNA 2210016L21 gene	0.32653
1378606_at	0.00265	0.000435	-6.19	-0.388444	-1.61465	Fam13b	family with sequence similarity 13, member B	0.326544
1383845_at	0.000186	8.02e-06	-11.5	4.04228	-1.614			0.32669
1390837_at	0.00214	0.000329	-6.48	-0.078934	-1.61383			0.32673
1372867_at	0.0118	0.00287	-4.46	-2.47029	-1.61331	Rnmt	RNA (guanine-7-) methyltransferase	0.326846
1392877_at	0.000531	4.41e-05	-8.88	2.15399	-1.61238	LOC102552880	uncharacterized LOC102552880	0.327058
1394575_at	0.000442	3.27e-05	-9.3	2.48797	-1.6122	Gnal	G protein subunit alpha L	0.327099
1388825_at	0.00193	0.000286	-6.63	0.078999	-1.6104			0.327509
1393163_at	0.000804	8.22e-05	-8.07	1.46229	-1.61031	Kcnc4	potassium voltage-gated channel subfamily C member 4	0.327527
1368896_at	0.00301	0.000515	-6.02	-0.575475	-1.61	Smad7	SMAD family member 7	0.327599
1376280_at	0.0205	0.00573	-3.91	-3.22217	-1.60962	Wnk2	WNK lysine deficient protein kinase 2	0.327684
1393707_at	0.000137	4.74e-06	-12.4	4.6201	-1.60913	Bcl2l2	Bcl2-like 2	0.327795
1385543_at	0.00067	6.28e-05	-8.41	1.76207	-1.60899	Akap10	A-kinase anchoring protein 10	0.327828
1373643_at	0.00039	2.63e-05	-9.61	2.72774	-1.60893			0.327841
1381627_at	0.00507	0.00101	-5.37	-1.3212	-1.60814	Snph	syntaphilin	0.328021
1389242_at	0.000644	5.89e-05	-8.5	1.83419	-1.60806			0.32804
1391714_at	0.0587	0.0203	-2.98	-4.575	-1.60719	Plag1	PLAG1 zinc finger	0.328237
1378164_at	0.0422	0.0136	-3.26	-4.15531	-1.60664	Hepacam	hepatic and glial cell adhesion molecule	0.328361
1367517_at	0.00223	0.000347	-6.42	-0.137449	-1.60565			0.328588
1384202_at	0.0029	0.00049	-6.07	-0.520588	-1.60564	Tesc	tescalcin	0.328591
1378330_at	0.00235	0.000371	-6.35	-0.211441	-1.60455			0.328837
1387155_at	0.001	0.000113	-7.68	1.11364	-1.60439	Pcsk2	proprotein convertase subtilisin/kexin type 2	0.328875
1392974_at	0.00617	0.00129	-5.15	-1.59407	-1.6034	Wasf1	WAS protein family, member 1	0.329101
1368242_at	0.0106	0.00252	-4.57	-2.32678	-1.60307	Kcnb1	potassium voltage-gated channel subfamily B member 1	0.329175
1390818_at	0.0041	0.000773	-5.62	-1.02425	-1.60167	Tfdp2	transcription factor Dp-2	0.329495
1368358_a_at	0.00294	0.000501	-6.05	-0.544009	-1.60132	Ptprr	protein tyrosine phosphatase, receptor type, R	0.329575
1377011_at	0.000248	1.24e-05	-10.8	3.55877	-1.60082	Fry	FRY microtubule binding protein	0.329689
1390378_at	0.000196	8.75e-06	-11.3	3.94624	-1.60007			0.329861
1395556_at	0.0091	0.00209	-4.73	-2.12305	-1.59947	Fam168b	family with sequence similarity 168, member B	0.329999
1368421_at	0.00346	0.000621	-5.83	-0.78275	-1.59909	Ptpn5	protein tyrosine phosphatase, non-receptor type 5	0.330084
1374164_at	0.0148	0.00384	-4.22	-2.78735	-1.59815	Nfasc	neurofascin	0.330301
1392891_at	0.00126	0.000158	-7.28	0.734287	-1.59722	Pds5b	PDS5 cohesin associated factor B	0.330512
1388176_at	0.00448	0.000862	-5.52	-1.14511	-1.59619	Nat8f5	N-acetyltransferase 8 (GCN5-related) family member 5	0.33075
1395294_at	0.000273	1.46e-05	-10.5	3.38299	-1.59597			0.3308
1390456_at	0.000877	9.34e-05	-7.91	1.32154	-1.59592			0.33081
1373315_at	0.000576	4.99e-05	-8.72	2.01798	-1.59541	Arnt2	aryl hydrocarbon receptor nuclear translocator 2	0.330928
1379867_at	0.00155	0.000209	-6.97	0.427821	-1.59481	Adgra1	adhesion G protein-coupled receptor A1	0.331066
1376115_at	0.00527	0.00106	-5.33	-1.37448	-1.59323			0.331428
1382168_at	0.00188	0.000276	-6.66	0.115647	-1.59258	Elavl3	ELAV like neuron-specific RNA binding protein 3	0.331578
1385577_at	0.000885	9.45e-05	-7.9	1.30824	-1.59175			0.331768
1396651_at	0.085	0.0314	-2.68	-5.03341	-1.59155			0.331815
1391212_at	0.000659	6.11e-05	-8.45	1.79337	-1.59126	Tceal1	transcription elongation factor A like 1	0.331881
1392993_at	0.000506	4.08e-05	-8.99	2.24058	-1.5908	Fam13b	family with sequence similarity 13, member B	0.331987
1377014_at	0.00572	0.00118	-5.23	-1.49159	-1.58994	Nim1k	NIM1 serine/threonine protein kinase	0.332185
1396565_at	0.00121	0.000149	-7.35	0.798745	-1.58967	RGD1565616	RGD1565616	0.332247
1387809_at	0.000722	7.02e-05	-8.27	1.6391	-1.58929	Map2k6	mitogen-activated protein kinase kinase 6	0.332335
1394831_at	0.00349	0.000628	-5.82	-0.794704	-1.58923	LOC102552888	uncharacterized LOC102552888	0.332348
1370410_at	0.000828	8.62e-05	-8.01	1.41051	-1.58902	Igsf1	immunoglobulin superfamily, member 1	0.332398
1373018_at	0.000728	7.12e-05	-8.25	1.62288	-1.58739	Spryd3	SPRY domain containing 3	0.332774
1396957_at	0.0675	0.0239	-2.87	-4.74698	-1.58695			0.332875
1380261_at	0.00281	0.000469	-6.11	-0.472473	-1.58618	Erich2	glutamate-rich 2	0.333053
1390043_at	0.000513	4.18e-05	-8.95	2.21433	-1.58343	Smarcc2	SWI/SNF related, matrix associated, actin dependent regulator of chromatin, subfamily c, member 2	0.333687
1393022_at	0.003	0.000514	-6.02	-0.572394	-1.58097	Ankrd13d	ankyrin repeat domain 13D	0.334258
1390482_at	0.00486	0.000958	-5.42	-1.26166	-1.57951	Tmod2	tropomodulin 2	0.334596
1383866_at	0.0216	0.0061	-3.86	-3.29006	-1.57946			0.334608
1376107_at	0.00194	0.000288	-6.62	0.070626	-1.5794			0.334621
1367787_at	0.0218	0.00615	-3.86	-3.29821	-1.57905	Ica1	islet cell autoantigen 1	0.334703
1383004_at	0.0001	2.58e-06	-13.6	5.28847	-1.5787	Ahcyl1	adenosylhomocysteinase-like 1	0.334783
1391249_at	0.00455	0.000881	-5.5	-1.16985	-1.57839	RGD1312005	similar to DD1	0.334856
1383405_at	0.000619	5.55e-05	-8.57	1.89865	-1.57813	Ppp1r26	protein phosphatase 1, regulatory subunit 26	0.334916
1374308_at	0.000996	0.000112	-7.69	1.12218	-1.57811	Sec14l2	SEC14-like lipid binding 2	0.334919
1390478_at	3.48e-05	4.34e-07	-17.6	7.21547	-1.57773	Orc4	origin recognition complex, subunit 4	0.335008
1397700_x_at	0.00248	0.000401	-6.27	-0.296726	-1.57687			0.335209
1398366_at	0.0181	0.00491	-4.03	-3.05428	-1.5768	LOC100912181///LOC100909847	uncharacterized LOC100912181///uncharacterized LOC100909847	0.335225
1378462_at	0.000399	2.76e-05	-9.54	2.67599	-1.57674	Mtap	methylthioadenosine phosphorylase	0.335238
1389786_at	0.00015	5.56e-06	-12.1	4.44573	-1.57633			0.335334
1380143_at	0.00187	0.000274	-6.67	0.12575	-1.57557			0.335511
1393124_at	0.00711	0.00155	-4.99	-1.79148	-1.57552	Kcna6	potassium voltage-gated channel subfamily A member 6	0.335522
1388799_at	0.000837	8.76e-05	-7.99	1.39278	-1.57523	Klhl7	kelch-like family member 7	0.335589
1389652_at	0.00572	0.00118	-5.23	-1.4912	-1.57358	Clcn3	chloride voltage-gated channel 3	0.335974
1368700_at	0.00296	0.000505	-6.04	-0.552449	-1.57346	Plcl1	phospholipase C-like 1	0.336002
1378269_at	0.0373	0.0117	-3.37	-3.99456	-1.57275	Dnal1	dynein, axonemal, light chain 1	0.336167
1369857_a_at	0.0686	0.0243	-2.85	-4.76739	-1.57201	Slc14a1	solute carrier family 14 (urea transporter), member 1	0.33634
1398446_at	0.0028	0.000468	-6.11	-0.468222	-1.57177	Fam189b	family with sequence similarity 189, member B	0.336396
1391208_at	0.00147	0.000195	-7.05	0.504974	-1.57092	Pcdh20	protocadherin 20	0.336594
1367716_at	0.00119	0.000145	-7.39	0.834824	-1.57068	Itfg1	integrin alpha FG-GAP repeat containing 1	0.336649
1374269_at	0.00113	0.000135	-7.47	0.91422	-1.5693	Apba1	amyloid beta precursor protein binding family A member 1	0.336971
1390809_at	0.012	0.00296	-4.44	-2.50209	-1.56582			0.337787
1367932_at	0.00311	0.000538	-5.97	-0.6243	-1.56556	Hmgcs1	3-hydroxy-3-methylglutaryl-CoA synthase 1	0.337848
1374243_at	0.000296	1.68e-05	-10.3	3.22648	-1.56432			0.338138
1379465_at	0.0359	0.0112	-3.41	-3.94594	-1.56426			0.338151
1393268_at	0.00276	0.000459	-6.13	-0.446899	-1.56374	LOC102549575	uncharacterized LOC102549575	0.338274
1368949_at	0.021	0.00587	-3.89	-3.24879	-1.56304	Ebf1	early B-cell factor 1	0.338436
1395736_at	0.00141	0.000184	-7.11	0.567963	-1.56172	Dstyk	dual serine/threonine and tyrosine protein kinase	0.338746
1375183_at	0.0346	0.0107	-3.44	-3.8966	-1.56168	Id4	inhibitor of DNA binding 4, HLH protein	0.338756
1385899_at	0.000269	1.41e-05	-10.5	3.41542	-1.56127	Trim16	tripartite motif-containing 16	0.338852
1389748_at	0.000135	4.55e-06	-12.5	4.66578	-1.56041			0.339054
1377352_at	0.00387	0.000719	-5.69	-0.945054	-1.56032			0.339075
1388925_at	1.71e-05	1.3e-07	-20.9	8.4909	-1.56014	Sirt5	sirtuin 5	0.339118
1370158_at	0.000157	6.12e-06	-11.9	4.34004	-1.55966	Myh10	myosin, heavy chain 10, non-muscle	0.339231
1396744_at	0.0111	0.0027	-4.51	-2.40011	-1.55818	LOC100909913///Ndp	norrin-like///NDP, norrin cystine knot growth factor	0.33958
1379075_at	0.00661	0.00141	-5.07	-1.691	-1.55752	Mboat2	membrane bound O-acyltransferase domain containing 2	0.339735
1375692_at	0.000338	2.09e-05	-9.95	2.98449	-1.55719			0.339813
1375421_a_at	0.000169	6.95e-06	-11.7	4.2008	-1.55685	Pja2	praja ring finger ubiquitin ligase 2	0.339893
1396409_at	0.000124	3.72e-06	-12.9	4.88715	-1.55674	Dtnb	dystrobrevin, beta	0.339918
1392588_at	0.00106	0.000121	-7.6	1.03242	-1.55552	Dstyk	dual serine/threonine and tyrosine protein kinase	0.340207
1395273_at	0.000363	2.34e-05	-9.78	2.85871	-1.55518	Ahcyl1	adenosylhomocysteinase-like 1	0.340285
1390174_at	0.00148	0.000197	-7.03	0.48939	-1.55498	Eml1	echinoderm microtubule associated protein like 1	0.340334
1376706_at	0.00144	0.00019	-7.08	0.532544	-1.55475	Tmem47	transmembrane protein 47	0.340387
1370892_at	0.0243	0.00701	-3.75	-3.44121	-1.5546	LOC100911579///C4b///C4a	complement C4-like///complement component 4B (Chido blood group)///complement component 4A (Rodgers blood group)	0.340424
1384124_at	0.000527	4.36e-05	-8.9	2.16717	-1.55452	Snhg4	small nucleolar RNA host gene 4 (non-protein coding)	0.340441
1395384_at	0.00332	0.000587	-5.89	-0.720145	-1.55446	Usp31	ubiquitin specific peptidase 31	0.340456
1373909_at	0.00184	0.000267	-6.7	0.154326	-1.5543	Tmem64	transmembrane protein 64	0.340493
1398716_at	0.00527	0.00106	-5.33	-1.37527	-1.55407			0.340548
1383932_at	0.00831	0.00188	-4.82	-2.00344	-1.55382			0.340607
1372951_at	0.000267	1.4e-05	-10.6	3.42535	-1.55248	Cables2	Cdk5 and Abl enzyme substrate 2	0.340924
1393454_at	0.00206	0.000314	-6.53	-0.025247	-1.551	Pcdh17	protocadherin 17	0.341274
1389736_at	0.0105	0.00249	-4.58	-2.31363	-1.55089	Cdkl2	cyclin dependent kinase like 2	0.3413
1369036_at	0.0126	0.00313	-4.39	-2.56484	-1.55016	Grik2	glutamate ionotropic receptor kainate type subunit 2	0.341472
1383218_at	0.00285	0.000479	-6.09	-0.495102	-1.54886			0.341779
1377249_at	0.00311	0.000539	-5.97	-0.625399	-1.54869	Gspt2	G1 to S phase transition 2	0.341821
1383707_at	0.00822	0.00185	-4.83	-1.98862	-1.54825	Gria4	glutamate ionotropic receptor AMPA type subunit 4	0.341924
1379389_at	0.00367	0.000673	-5.75	-0.871571	-1.54638	Ncam1	neural cell adhesion molecule 1	0.342367
1374785_at	0.00391	0.000728	-5.68	-0.958561	-1.5448	Clec2l	C-type lectin domain family 2, member L	0.342744
1378965_at	0.0467	0.0154	-3.18	-4.28409	-1.54474			0.342757
1397698_at	0.00183	0.000265	-6.71	0.160817	-1.54444			0.342828
1383777_at	0.00238	0.000378	-6.33	-0.233264	-1.54439			0.34284
1373223_at	0.00807	0.00181	-4.85	-1.96248	-1.54425	Fam171b	family with sequence similarity 171, member B	0.342873
1370724_a_at	0.00235	0.000372	-6.35	-0.214601	-1.5441	Nfia	nuclear factor I/A	0.342908
1390856_at	0.000605	5.35e-05	-8.62	1.9408	-1.544	Rfx3	regulatory factor X3	0.342932
1389107_at	0.0298	0.00899	-3.57	-3.70851	-1.54286	Cgnl1	cingulin-like 1	0.343203
1377957_at	0.000556	4.72e-05	-8.79	2.07997	-1.54272			0.343238
1380131_at	0.000371	2.42e-05	-9.73	2.82142	-1.54256	Wdr37	WD repeat domain 37	0.343275
1371112_at	0.0581	0.02	-2.99	-4.56258	-1.54229	Ret	ret proto-oncogene	0.343339
1384453_at	0.00128	0.00016	-7.27	0.71999	-1.54154			0.343518
1378689_at	0.0458	0.0151	-3.19	-4.26171	-1.54154			0.343519
1394243_at	0.000344	2.14e-05	-9.91	2.95669	-1.54111	Sms	spermine synthase	0.343622
1392473_at	0.00236	0.000374	-6.34	-0.221754	-1.5409			0.343672
1380695_at	0.000458	3.48e-05	-9.21	2.41809	-1.53966	Zyg11b	zyg-11 family member B, cell cycle regulator	0.343966
1388738_at	0.00576	0.00119	-5.22	-1.50112	-1.53943	Atrnl1	attractin like 1	0.344022
1391948_at	0.00476	0.000934	-5.44	-1.23327	-1.53873	Bcl11b	B-cell CLL/lymphoma 11B	0.344189
1377043_at	0.000995	0.000112	-7.7	1.12385	-1.53783	Fam49b	family with sequence similarity 49, member B	0.344403
1369520_a_at	0.00448	0.000862	-5.52	-1.14514	-1.53754	Bcat1	branched chain amino acid transaminase 1	0.344472
[truncated: 29,104 more rows]
