# Supplementary material for: Comparative Transcriptomics of Rat and Axolotl After Spinal Cord Injury Dissects Differences and Similarities in Inflammatory and Matrix Remodeling Gene Expression Patterns
Source: Front Neurosci. 2018 Nov 13;12:808. doi: 10.3389/fnins.2018.00808 (PMC6262295; doi:10.3389/fnins.2018.00808)
Supplement: Supplementary file 2 [file Table_2.XLSX]

## Sheet: RAT DAY3
Rat DAY 3
Genes are sorted by Fold-Change (FC) Injury / Sham. Negative values are downregulated after Injury and positive values are upregulated after Injury. T-test p-value. Benjamini-Hochberg adjusted p-value. Unlog2 is also shown.
SHAM VS SCI DAY 3
DOWNLOADED FROM: https://www.ncbi.nlm.nih.gov/geo/query/acc.cgi?acc=GSE45006
ID	adj.P.Val	P.Value	t	B	logFC	Gene symbol	Gene name	unlog2
1372492_at	0.000147	3.46e-06	-12.6015	5.12285	-5.64088	Cldn10	claudin 10	0.0200413
1372208_at	9.36e-05	1.51e-06	-14.1924	6.00198	-5.41507	Ppp1r1b	protein phosphatase 1, regulatory (inhibitor) subunit 1B	0.0234371
1398255_at	3.66e-05	1.68e-07	-19.3523	8.24685	-5.28012	Slc15a2	solute carrier family 15 member 2	0.0257351
1371762_at	0.000459	2.38e-05	-9.51585	3.04344	-5.06851	Rbp4	retinol binding protein 4	0.0298006
1367700_at	0.00251	0.000285	-6.51495	0.32668	-5.03605	Fmod	fibromodulin	0.0304787
1367887_at	4.83e-05	4.01e-07	-17.1271	7.37447	-5.00275	Lcat	lecithin cholesterol acyltransferase	0.0311904
1368577_at	0.000325	1.37e-05	-10.3272	3.64716	-4.89873	Gjb6	gap junction protein, beta 6	0.0335224
1368380_at	0.00439	0.000609	-5.76386	-0.50515	-4.85518	Vtn	vitronectin	0.0345497
1377018_at	0.000477	2.54e-05	-9.42437	2.9724	-4.84769	Pamr1	peptidase domain containing associated with muscle regeneration 1	0.0347295
1387348_at	0.00352	0.000451	-6.05408	-0.17519	-4.67306	Igfbp5	insulin-like growth factor binding protein 5	0.0391984
1374172_at	0.0156	0.00311	-4.34574	-2.28543	-4.575	Col8a2	collagen type VIII alpha 2 chain	0.0419553
1370205_at	0.00313	0.000386	-6.20764	-0.00502	-4.5677	Slco1c1	solute carrier organic anion transporter family, member 1c1	0.0421681
1367749_at	0.00183	0.000185	-6.97661	0.80375	-4.54134	Lum	lumican	0.0429457
1385038_at	0.000118	2.35e-06	-13.3179	5.53233	-4.53744			0.0430622
1368064_a_at	0.000142	3.27e-06	-12.705	5.18347	-4.53503	Ddc	dopa decarboxylase	0.0431341
1385729_at	7.8e-05	1.02e-06	-15.0123	6.41498	-4.49775	Klhdc7a	kelch domain containing 7A	0.0442632
1388469_at	0.000974	7.4e-05	-8.03064	1.80605	-4.48987	Igf1	insulin-like growth factor 1	0.0445055
1367571_a_at	0.00636	0.00099	-5.31536	-1.03736	-4.40832	Igf2	insulin-like growth factor 2	0.0470939
1382599_at	8.38e-05	1.22e-06	-14.6205	6.22076	-4.40072	Igf1	insulin-like growth factor 1	0.0473425
1368816_at	0.059	0.0165	-3.10366	-4.07252	-4.37989	Mpz	myelin protein zero	0.0480311
1370956_at	0.072	0.0213	-2.92735	-4.33905	-4.3709	Dcn	decorin	0.0483314
1389583_at	4.95e-05	4.28e-07	-16.9667	7.30653	-4.29607	Slc25a34	solute carrier family 25, member 34	0.0509043
1388866_at	3.74e-05	1.84e-07	-19.1101	8.15784	-4.26926	Sspn	sarcospan	0.0518589
1370333_a_at	0.00425	0.000581	-5.80907	-0.45301	-4.26224	Igf1	insulin-like growth factor 1	0.0521119
1376749_at	0.0273	0.00632	-3.79772	-3.05033	-4.23934	LOC100910855///Ogn	mimecan-like///osteoglycin	0.0529458
1369705_at	0.103	0.0335	-2.61781	-4.80992	-4.14979	Slc6a20	solute carrier family 6 member 20	0.0563362
1369491_at	0.00112	9.08e-05	-7.78435	1.58195	-4.07882	Dao	D-amino-acid oxidase	0.0591768
1370999_at	4.74e-05	3.83e-07	-17.2366	7.42045	-4.01077	Spag5	sperm associated antigen 5	0.062035
1377828_at	9.41e-05	1.54e-06	-14.1484	5.9791	-4.00319	Ano3	anoctamin 3	0.0623621
1392569_at	0.000347	1.51e-05	-10.1735	3.53631	-4.00108			0.0624531
1369332_a_at	2.6e-05	8.53e-08	-21.2843	8.91135	-3.99404	Rims1	regulating synaptic membrane exocytosis 1	0.0627589
1396060_at	0.00411	0.000555	-5.85177	-0.40402	-3.97343	Creg2	cellular repressor of E1A-stimulated genes 2	0.0636618
1372818_at	0.0071	0.00114	-5.18679	-1.19508	-3.9346	Colec12	collectin sub-family member 12	0.0653984
1387094_at	0.00816	0.00138	-5.02138	-1.40145	-3.89534	Slco1a2	solute carrier organic anion transporter family, member 1A2	0.0672026
1388920_at	0.0222	0.0049	-3.99159	-2.77502	-3.88761	Bmp6	bone morphogenetic protein 6	0.0675636
1368728_at	0.000885	6.36e-05	-8.21707	1.97186	-3.88483	P2ry12	purinergic receptor P2Y12	0.067694
1373696_at	6.53e-05	7.31e-07	-15.7311	6.75722	-3.86971	LOC100910558	uncharacterized LOC100910558	0.068407
1391721_at	0.00488	0.000699	-5.63421	-0.65617	-3.85578			0.0690708
1387065_at	1.33e-05	1.51e-08	-27.1134	10.5209	-3.85429	Plcd4	phospholipase C, delta 4	0.0691422
1382083_at	0.00558	0.000838	-5.46656	-0.85484	-3.85217	Coch	cochlin	0.0692437
1398462_at	0.00487	0.000697	-5.63649	-0.6535	-3.84148			0.0697586
1380228_at	0.00131	0.000116	-7.50053	1.31628	-3.83482	Rimkla	ribosomal modification protein rimK-like family member A	0.0700817
1391331_at	0.000916	6.73e-05	-8.14656	1.90952	-3.80627			0.0714821
1387197_at	0.000455	2.35e-05	-9.53266	3.05643	-3.8048	Omd	osteomodulin	0.0715549
1385248_a_at	0.00925	0.00162	-4.88665	-1.57246	-3.76508	LOC100910855///Ogn	mimecan-like///osteoglycin	0.0735524
1387004_at	0.00381	0.000503	-5.94712	-0.29551	-3.72571	Nbl1	neuroblastoma 1, DAN family BMP antagonist	0.0755875
1371400_at	8.34e-05	1.21e-06	-14.6463	6.23373	-3.72291	Thrsp	thyroid hormone responsive	0.075734
1368561_at	9e-05	1.41e-06	-14.3321	6.07418	-3.71792	Abcd2	ATP binding cassette subfamily D member 2	0.0759965
1383263_at	0.00341	0.000432	-6.09664	-0.12772	-3.71783	LOC100910855///Ogn	mimecan-like///osteoglycin	0.0760015
1391758_at	0.000122	2.51e-06	-13.1962	5.46443	-3.68356	Ablim1	actin-binding LIM protein 1	0.0778285
1370019_at	0.0131	0.00251	-4.51816	-2.05356	-3.64729	Sult1a1	sulfotransferase family 1A member 1	0.07981
1382835_at	3.97e-05	2.34e-07	-18.4764	7.91836	-3.64207			0.0800993
1394517_at	3.97e-05	2.4e-07	-18.4084	7.89207	-3.61275			0.0817436
1372935_at	0.000709	4.59e-05	-8.63213	2.32968	-3.61105	Tmem119	transmembrane protein 119	0.0818401
1374496_at	0.000254	9.12e-06	-10.9552	4.08436	-3.59559	Tril	TLR4 interactor with leucine-rich repeats	0.0827215
1383413_at	0.000971	7.36e-05	-8.0379	1.81257	-3.57356	Hhatl	hedgehog acyltransferase-like	0.0839944
1374367_at	0.000875	6.25e-05	-8.23878	1.99096	-3.57327	LOC100910415///Grxcr1	glutaredoxin domain-containing cysteine-rich protein 1-like///glutaredoxin and cysteine rich domain containing 1	0.0840113
1396092_at	0.000602	3.62e-05	-8.94184	2.58698	-3.5445	Nkiras1	NFKB inhibitor interacting Ras-like 1	0.0857037
1390450_a_at	0.00362	0.00047	-6.01232	-0.22199	-3.52523	LOC100910855///Ogn	mimecan-like///osteoglycin	0.0868563
1390112_at	0.0107	0.00193	-4.73806	-1.76408	-3.52068	Efemp1	EGF-containing fibulin-like extracellular matrix protein 1	0.0871306
1370115_at	0.000132	2.88e-06	-12.9399	5.3192	-3.50982	Slc7a10	solute carrier family 7 member 10	0.0877887
1370892_at	0.000741	4.9e-05	-8.54641	2.25702	-3.50746	LOC100911579///C4b///C4a	complement C4-like///complement component 4B (Chido blood group)///complement component 4A (Rodgers blood group)	0.0879326
1370991_at	0.000175	4.62e-06	-12.0901	4.81556	-3.4971	Nat8f3	N-acetyltransferase 8 (GCN5-related) family member 3	0.088566
1394821_at	1.47e-05	2.08e-08	-25.9233	10.2327	-3.48362			0.0893976
1370595_a_at	0.000223	7.2e-06	-11.3373	4.33859	-3.47017	Kcnip4	potassium voltage-gated channel interacting protein 4	0.0902349
1391089_at	0.011	0.00201	-4.70407	-1.80836	-3.4695			0.0902768
1370705_at	0.0137	0.00265	-4.47605	-2.1098	-3.43929	Zfp597	zinc finger protein 597	0.0921869
1378314_at	0.00133	0.000119	-7.47197	1.28909	-3.43491			0.0924673
1368815_at	0.0619	0.0176	-3.06098	-4.13685	-3.40866	Mpz	myelin protein zero	0.0941654
1379492_at	7.95e-05	1.08e-06	-14.8889	6.35441	-3.39769			0.0948842
1386348_at	0.000754	5.02e-05	-8.51437	2.2297	-3.39644			0.0949663
1395769_at	0.0004	1.89e-05	-9.84551	3.29433	-3.3801	Acsl6	acyl-CoA synthetase long-chain family member 6	0.0960479
1388201_at	0.0139	0.0027	-4.46042	-2.13074	-3.37658	Bmp6	bone morphogenetic protein 6	0.0962828
1377773_at	0.00677	0.00108	-5.23876	-1.13105	-3.36308	Gabrb2	gamma-aminobutyric acid type A receptor beta 2 subunit	0.0971879
1377632_at	6.54e-05	7.43e-07	-15.6946	6.74026	-3.33476	Timp4	tissue inhibitor of metalloproteinase 4	0.0991144
1378818_at	0.000103	1.85e-06	-13.7883	5.78893	-3.32934			0.0994878
1369751_at	0.00102	7.92e-05	-7.94863	1.73208	-3.30969	Trhr	thyrotropin releasing hormone receptor	0.100852
1369500_at	3.14e-06	5.04e-10	-43.4672	13.1721	-3.295	Kcnk1	potassium two pore domain channel subfamily K member 1	0.101884
1370959_at	0.169	0.0634	-2.19051	-5.45597	-3.27832	Col3a1	collagen type III alpha 1 chain	0.103069
1395487_at	0.00014	3.17e-06	-12.7613	5.21624	-3.26278			0.104185
1371104_at	0.000519	2.88e-05	-9.25417	2.83854	-3.23029	Srebf1	sterol regulatory element binding transcription factor 1	0.106558
1370960_at	0.00445	0.000621	-5.74577	-0.52608	-3.18621	Igfbp5	insulin-like growth factor binding protein 5	0.109864
1397924_at	0.000117	2.3e-06	-13.3602	5.55579	-3.17647			0.110608
1397830_at	0.00228	0.000249	-6.65465	0.47367	-3.16921	Igfbp5	insulin-like growth factor binding protein 5	0.111167
1393109_at	0.000181	4.93e-06	-11.9747	4.74442	-3.16894			0.111187
1370747_at	0.000257	9.35e-06	-10.9151	4.05713	-3.16108	Fgf9	fibroblast growth factor 9	0.111794
1368362_a_at	0.000229	7.54e-06	-11.2617	4.28895	-3.14329	Asgr2	asialoglycoprotein receptor 2	0.113182
1384236_at	0.000179	4.8e-06	-12.0226	4.77405	-3.14275	Sptssb	serine palmitoyltransferase, small subunit B	0.113224
1396152_s_at	0.0015	0.000141	-7.27923	1.10338	-3.13603	Igfbp5	insulin-like growth factor binding protein 5	0.113753
1387372_at	0.00739	0.00121	-5.13874	-1.25462	-3.13496	Slc6a13	solute carrier family 6 member 13	0.113837
1394412_at	0.000138	3.06e-06	-12.825	5.25311	-3.12686	Ano3	anoctamin 3	0.114478
1389548_at	4.74e-05	3.81e-07	-17.2458	7.42429	-3.11618	Adhfe1	alcohol dehydrogenase, iron containing, 1	0.115329
1395023_at	0.000132	2.84e-06	-12.9664	5.33434	-3.11343	Rorb	RAR-related orphan receptor B	0.115549
1367847_at	0.0127	0.0024	-4.55593	-2.00334	-3.11146	Nupr1	nuclear protein, transcriptional regulator, 1	0.115706
1373754_at	0.00104	8.09e-05	-7.92263	1.70849	-3.1107	Golm1	golgi membrane protein 1	0.115768
1378063_at	3.97e-05	2.33e-07	-18.4839	7.92125	-3.10926			0.115883
1385782_at	0.000132	2.86e-06	-12.9485	5.32409	-3.08754			0.11764
1386023_at	1.53e-05	2.4e-08	-25.41	10.1027	-3.08199	Lgi1	leucine-rich, glioma inactivated 1	0.118095
1396696_at	0.000716	4.65e-05	-8.61443	2.31473	-3.08188	Gria4	glutamate ionotropic receptor AMPA type subunit 4	0.118103
1374859_at	0.0025	0.000283	-6.52224	0.33441	-3.07532			0.118641
1383811_at	0.000217	6.75e-06	-11.4448	4.40861	-3.06253	LOC100362814	hypothetical protein LOC100362814	0.119698
1394577_at	0.00479	0.000682	-5.6577	-0.62863	-3.05395	Esrrg	estrogen-related receptor gamma	0.120412
1386123_at	3.74e-05	1.83e-07	-19.1189	8.1611	-3.05235			0.120546
1385393_at	0.000139	3.11e-06	-12.7991	5.23814	-3.04853			0.120865
1390537_at	0.00126	0.000109	-7.56872	1.38085	-3.04708	Slc25a18	solute carrier family 25 member 18	0.120986
1370666_at	0.000357	1.58e-05	-10.1109	3.49071	-3.04559	Dnm3	dynamin 3	0.121112
1393622_at	0.00126	0.000109	-7.57239	1.38431	-3.04519	Hecw1	HECT, C2 and WW domain containing E3 ubiquitin protein ligase 1	0.121145
1369640_at	0.000428	2.1e-05	-9.69212	3.17857	-3.04197	Gja1	gap junction protein, alpha 1	0.121416
1368008_at	0.000248	8.61e-06	-11.0476	4.14661	-3.04014	Prom1	prominin 1	0.12157
1377942_at	4.52e-05	3.36e-07	-17.5584	7.55363	-3.0309			0.122351
1368612_at	0.00828	0.00141	-5.00553	-1.42143	-3.02724	Itgb4	integrin subunit beta 4	0.122662
1392003_at	0.000151	3.59e-06	-12.5357	5.08403	-3.01743			0.123499
1397060_at	0.000146	3.41e-06	-12.6304	5.1398	-3.01161			0.123998
1376398_at	0.000168	4.25e-06	-12.2347	4.90378	-3.01142	Synpo2	synaptopodin 2	0.124014
1368003_at	0.0257	0.00586	-3.85472	-2.96887	-3.01111	Aldh1a2	aldehyde dehydrogenase 1 family, member A2	0.124041
1392644_s_at	8.47e-05	1.24e-06	-14.5903	6.20557	-2.99937	Tdrp	testis development related protein	0.125055
1390638_at	0.000708	4.58e-05	-8.63421	2.33143	-2.99777	Epha4	Eph receptor A4	0.125193
1378860_at	0.00124	0.000106	-7.59877	1.40916	-2.9903	Dpy19l3	dpy-19-like 3 (C. elegans)	0.125843
1386641_at	0.000437	2.19e-05	-9.63747	3.13692	-2.97798	Hlf	HLF, PAR bZIP transcription factor	0.126923
1390532_at	0.0368	0.00917	-3.5231	-3.44852	-2.97208	Slc13a4	solute carrier family 13 member 4	0.127442
1391428_at	0.000143	3.3e-06	-12.6887	5.17393	-2.96959			0.127663
1370078_at	0.00245	0.000275	-6.55283	0.36677	-2.96229	Lin7b	lin-7 homolog B, crumbs cell polarity complex component	0.12831
1382431_at	0.000638	3.93e-05	-8.83275	2.49727	-2.95811	Abca1	ATP binding cassette subfamily A member 1	0.128683
1379747_at	0.229	0.0993	-1.88979	-5.89698	-2.9409	Prss35	protease, serine, 35	0.130227
1378808_at	0.00612	0.000942	-5.35992	-0.98323	-2.91998			0.132129
1376344_at	0.00261	0.000302	-6.45686	0.26486	-2.91618			0.132477
1370320_at	0.000572	3.34e-05	-9.04949	2.67457	-2.90308	Pbld2///Pbld1	phenazine biosynthesis-like protein domain containing 2///phenazine biosynthesis-like protein domain containing 1	0.133686
1391435_at	0.000388	1.8e-05	-9.92012	3.35002	-2.90276	Pltp	phospholipid transfer protein	0.133715
1371052_at	3.97e-05	2.22e-07	-18.6102	7.96973	-2.90264	Nog	noggin	0.133727
1393064_at	9.95e-05	1.75e-06	-13.8981	5.84747	-2.89189			0.134727
1376765_at	3.74e-05	1.79e-07	-19.18	8.18365	-2.87725	Mro	maestro	0.136101
1374705_at	0.00801	0.00135	-5.04149	-1.37616	-2.87227	Col4a5	collagen type IV alpha 5 chain	0.136572
1372479_at	4.43e-05	3.15e-07	-17.7197	7.61931	-2.86321	Slc4a4	solute carrier family 4 member 4	0.137432
1383571_at	0.00446	0.000621	-5.74471	-0.52732	-2.85062	Rapgefl1	Rap guanine nucleotide exchange factor like 1	0.138636
1381311_at	0.0198	0.00422	-4.10601	-2.61491	-2.84858	Adgre1	adhesion G protein-coupled receptor E1	0.138833
1387669_a_at	0.000755	5.04e-05	-8.50918	2.22527	-2.84735	Ephx1	epoxide hydrolase 1	0.138951
1396117_at	5.22e-05	4.7e-07	-16.7439	7.21088	-2.84278	Luzp2	leucine zipper protein 2	0.139392
1383268_at	0.00133	0.000118	-7.47381	1.29085	-2.84006	Vstm2a	V-set and transmembrane domain containing 2A	0.139655
1371211_a_at	0.00696	0.00112	-5.20726	-1.16981	-2.8366	Nrg1	neuregulin 1	0.139991
1369390_a_at	0.00401	0.000539	-5.8806	-0.37109	-2.83529	Dpp6	dipeptidyl peptidase like 6	0.140118
1382850_at	0.00803	0.00135	-5.03966	-1.37846	-2.81948	Syn2	synapsin II	0.141661
1397983_at	0.00479	0.000681	-5.65802	-0.62827	-2.81213			0.142385
1389086_at	0.0042	0.000572	-5.82379	-0.4361	-2.80553	Susd4	sushi domain containing 4	0.143038
1393743_at	0.00032	1.33e-05	-10.3662	3.67503	-2.79666	Ppargc1a	PPARG coactivator 1 alpha	0.14392
1377266_at	0.000658	4.1e-05	-8.77922	2.45288	-2.79283			0.144302
1383726_at	0.0018	0.00018	-7.00456	0.83184	-2.77945	Rgs7bp	regulator of G-protein signaling 7 binding protein	0.145647
1387625_at	0.0299	0.00706	-3.7156	-3.16843	-2.77913	Igfbp6	insulin-like growth factor binding protein 6	0.145679
1370607_a_at	0.0331	0.00803	-3.61972	-3.30738	-2.76656	Nrg1	neuregulin 1	0.146955
1379452_at	0.00212	0.000225	-6.76266	0.58574	-2.76617	Gas2	growth arrest-specific 2	0.146994
1374709_at	0.00021	6.35e-06	-11.5446	4.47302	-2.76583	Hlf	HLF, PAR bZIP transcription factor	0.147028
1394997_at	0.000517	2.86e-05	-9.25989	2.84308	-2.74306	Ttbk2	tau tubulin kinase 2	0.149368
1369627_at	0.0017	0.000166	-7.09121	0.9184	-2.73711	Sv2b	synaptic vesicle glycoprotein 2b	0.149985
1393682_at	0.000315	1.3e-05	-10.3988	3.6983	-2.72514	Gpr34	G protein-coupled receptor 34	0.151235
1391687_at	9.66e-05	1.63e-06	-14.0386	5.92166	-2.72438	Dtna	dystrobrevin, alpha	0.151314
1369297_at	0.000997	7.65e-05	-7.9907	1.77011	-2.71746	Ppp2r2c	protein phosphatase 2, regulatory subunit B, gamma	0.152041
1373674_at	0.00167	0.000162	-7.1215	0.94846	-2.70888	Mfap5	microfibrillar associated protein 5	0.152949
1396672_at	0.000298	1.18e-05	-10.5546	3.80834	-2.69585	LOC498507	T-cell receptor alpha chain V region PY14-like	0.154336
1383063_a_at	0.00124	0.000106	-7.60671	1.41662	-2.69575			0.154347
1386697_at	0.00146	0.000135	-7.3265	1.14929	-2.68959	Nxph1	neurexophilin 1	0.155007
1380696_at	0.0815	0.025	-2.81762	-4.50573	-2.68918	Fam102b	family with sequence similarity 102, member B	0.155051
1395695_at	0.00201	0.000209	-6.8404	0.66556	-2.68902	Aebp1	AE binding protein 1	0.155069
1393350_at	0.00685	0.0011	-5.22511	-1.14783	-2.68881			0.155091
1380822_at	0.000677	4.26e-05	-8.72654	2.40897	-2.68338	P2ry12	purinergic receptor P2Y12	0.155676
1369756_a_at	0.000477	2.54e-05	-9.42629	2.97389	-2.67638	Slc4a4	solute carrier family 4 member 4	0.156434
1398538_at	0.000209	6.29e-06	-11.5608	4.48342	-2.6754	Abhd8	abhydrolase domain containing 8	0.156539
1387809_at	1.53e-05	2.5e-08	-25.27	10.0666	-2.67151	Map2k6	mitogen-activated protein kinase kinase 6	0.156962
1379414_at	0.016	0.00322	-4.3182	-2.32287	-2.67097	Ube2ql1	ubiquitin-conjugating enzyme E2Q family-like 1	0.157022
1372168_s_at	0.0455	0.0119	-3.3322	-3.73042	-2.66826	Igfbp6	insulin-like growth factor binding protein 6	0.157317
1387696_a_at	0.000835	5.8e-05	-8.33164	2.07216	-2.66563	Glra2	glycine receptor, alpha 2	0.157603
1389166_at	0.00202	0.000212	-6.82912	0.65402	-2.66511	Cib2	calcium and integrin binding family member 2	0.15766
1392309_at	0.0242	0.00546	-3.90829	-2.89269	-2.66126	Jam2	junctional adhesion molecule 2	0.158082
1381771_at	0.00188	0.000191	-6.93959	0.76639	-2.6581			0.158428
1375908_at	0.00662	0.00105	-5.26629	-1.09728	-2.6578	Mpzl2	myelin protein zero-like 2	0.158461
1369407_at	0.00836	0.00143	-4.99447	-1.43539	-2.64415	Tnfrsf11b	TNF receptor superfamily member 11B	0.159967
1386728_at	0.000506	2.77e-05	-9.30549	2.87913	-2.64077			0.160342
1380182_at	0.00487	0.000695	-5.63921	-0.6503	-2.63424	Etl4	enhancer trap locus 4	0.16107
1394425_at	0.00034	1.46e-05	-10.2238	3.57276	-2.63322			0.161184
1384862_at	0.000432	2.15e-05	-9.66408	3.15723	-2.63316			0.161191
1394430_at	0.00125	0.000108	-7.58568	1.39684	-2.6294			0.161611
1393252_at	0.00134	0.00012	-7.45717	1.27497	-2.62916			0.161638
1394837_at	0.0365	0.00908	-3.5299	-3.43854	-2.6291			0.161645
1395661_at	0.00348	0.000443	-6.07087	-0.15643	-2.62825			0.16174
1393324_at	0.0222	0.00488	-3.99473	-2.7706	-2.62565	Jam2	junctional adhesion molecule 2	0.162032
1370089_at	0.000114	2.21e-06	-13.4369	5.59816	-2.62485	Ppargc1a	PPARG coactivator 1 alpha	0.162122
1390539_at	0.000758	5.08e-05	-8.49997	2.2174	-2.62068			0.162591
1395518_at	2.05e-05	4.51e-08	-23.2718	9.51991	-2.61696	Ppargc1a	PPARG coactivator 1 alpha	0.163011
1373158_at	0.000396	1.85e-05	-9.87701	3.31789	-2.616	Gpr146	G protein-coupled receptor 146	0.16312
1369957_at	8.01e-05	1.1e-06	-14.8416	6.33107	-2.61087	Rgs5	regulator of G-protein signaling 5	0.1637
1378753_at	0.00225	0.000245	-6.67584	0.49576	-2.60858	Ocln	occludin	0.16396
1370150_a_at	0.000199	5.78e-06	-11.7037	4.57458	-2.60804	Thrsp	thyroid hormone responsive	0.164022
1384866_at	0.00447	0.000625	-5.73976	-0.53305	-2.60602	Entpd3	ectonucleoside triphosphate diphosphohydrolase 3	0.164251
1385491_at	0.0039	0.000518	-5.91792	-0.32862	-2.60553	Pnmal2	paraneoplastic Ma antigen family-like 2	0.164307
1368052_at	0.149	0.0538	-2.29961	-5.29239	-2.59839	Tspan8	tetraspanin 8	0.165123
1392842_at	0.00138	0.000125	-7.40884	1.22869	-2.58565			0.166588
1387363_at	0.0026	0.000301	-6.45987	0.26808	-2.58526	Folh1	folate hydrolase 1	0.166632
1398707_at	0.00429	0.000588	-5.79678	-0.46716	-2.56437	LOC102555246	uncharacterized LOC102555246	0.169063
1374699_at	0.000407	1.94e-05	-9.80777	3.266	-2.55874	Fam84a	family with sequence similarity 84, member A	0.169724
1391809_at	0.00983	0.00174	-4.82323	-1.65385	-2.55781			0.169833
1370973_at	0.0461	0.0121	-3.32038	-3.748	-2.54948	Scn7a	sodium voltage-gated channel alpha subunit 7	0.170816
1388546_at	1.4e-05	1.7e-08	-26.6691	10.4154	-2.54729	Ablim1	actin-binding LIM protein 1	0.171077
1377455_at	0.0112	0.00205	-4.68723	-1.83037	-2.5463			0.171194
1383220_at	0.00151	0.000142	-7.26811	1.09255	-2.54602	Kcnip4	potassium voltage-gated channel interacting protein 4	0.171226
1372626_at	0.0019	0.000194	-6.92367	0.75028	-2.5457	Tpd52l1	tumor protein D52-like 1	0.171265
1381207_at	0.00246	0.000277	-6.54353	0.35694	-2.53756			0.172234
1392382_at	0.00142	0.000131	-7.36024	1.18191	-2.53452			0.172597
1381993_at	2.59e-05	8.34e-08	-21.3544	8.93403	-2.5338	Clic2	chloride intracellular channel 2	0.172683
1391547_at	0.00107	8.51e-05	-7.86171	1.65297	-2.52345			0.173926
1373614_at	0.00163	0.000157	-7.15826	0.9848	-2.52297	Chat	choline O-acetyltransferase	0.173985
1387380_at	0.0131	0.00252	-4.51756	-2.05436	-2.52012	Slc32a1	solute carrier family 32 member 1	0.174328
1369079_at	0.000411	1.97e-05	-9.78362	3.24782	-2.50323	Nxph1	neurexophilin 1	0.176381
1387285_at	0.00978	0.00173	-4.82933	-1.646	-2.50185	Atp2b2	ATPase plasma membrane Ca2+ transporting 2	0.17655
1370952_at	0.00104	8.1e-05	-7.92168	1.70763	-2.50067	Gstm2	glutathione S-transferase mu 2	0.176695
1398727_at	5.36e-05	4.93e-07	-16.634	7.16321	-2.50055			0.176709
1393575_at	0.000502	2.74e-05	-9.32319	2.89309	-2.4997	LOC102553298	uncharacterized LOC102553298	0.176814
1381350_at	0.000285	1.09e-05	-10.678	3.8944	-2.49919			0.176877
1395714_at	0.0309	0.00736	-3.68401	-3.21408	-2.49778	LOC102553515	uncharacterized LOC102553515	0.177049
1372647_at	0.00799	0.00134	-5.04487	-1.37191	-2.4971			0.177133
1389814_at	0.121	0.0409	-2.4842	-5.01314	-2.49152	Huwe1	HECT, UBA and WWE domain containing 1, E3 ubiquitin protein ligase	0.177819
1386026_at	8.01e-05	1.11e-06	-14.8289	6.32474	-2.48969	Tet1	tet methylcytosine dioxygenase 1	0.178045
1385826_at	1.68e-05	3.25e-08	-24.3632	9.82595	-2.48527			0.178591
1380712_at	4.06e-05	2.51e-07	-18.2937	7.84749	-2.48433	Ntm	neurotrimin	0.178707
1382072_at	0.00175	0.000173	-7.04899	0.87633	-2.47758	Olfml2a	olfactomedin-like 2A	0.179545
1379772_at	0.00512	0.000744	-5.57608	-0.72462	-2.47758	Aplnr	apelin receptor	0.179546
1375495_at	0.0194	0.00412	-4.1245	-2.58922	-2.47488	Cdkl4	cyclin-dependent kinase-like 4	0.179882
1389975_at	6.89e-05	8.1e-07	-15.5022	6.65014	-2.47168	Elavl4	ELAV like neuron-specific RNA binding protein 4	0.180282
1397241_at	0.000976	7.42e-05	-8.02726	1.80301	-2.4677	Rimkla	ribosomal modification protein rimK-like family member A	0.18078
1376074_at	0.000392	1.82e-05	-9.90072	3.33558	-2.46489	Rab11fip4	RAB11 family interacting protein 4	0.181131
1380884_at	0.000344	1.49e-05	-10.1976	3.55375	-2.45904			0.181867
1385061_at	4.64e-05	3.53e-07	-17.4341	7.50252	-2.45851	Tmem229a	transmembrane protein 229A	0.181935
1387543_at	0.00237	0.000264	-6.59699	0.41329	-2.45601	Slc5a7	solute carrier family 5 member 7	0.18225
1368399_a_at	0.00154	0.000145	-7.24563	1.0706	-2.45174	Cpq	carboxypeptidase Q	0.18279
1397333_at	2.11e-05	5.6e-08	-22.5748	9.31441	-2.44212	Samd12	sterile alpha motif domain containing 12	0.184014
1396057_at	0.000618	3.76e-05	-8.89365	2.54747	-2.4399			0.184296
1374262_at	0.000162	4.06e-06	-12.3167	4.95334	-2.43612			0.184779
1385364_at	0.00268	0.000313	-6.41881	0.22416	-2.43585			0.184814
1394129_at	0.000655	4.07e-05	-8.78628	2.45875	-2.43068			0.185478
1384233_at	0.000123	2.58e-06	-13.1428	5.43438	-2.42849			0.18576
1368296_at	0.000271	1.01e-05	-10.792	3.97313	-2.42836	Slco2b1	solute carrier organic anion transporter family, member 2b1	0.185777
1374244_at	0.00122	0.000104	-7.62575	1.4345	-2.42824	LOC501038	Ab2-060	0.185792
1379505_at	0.000106	1.94e-06	-13.6884	5.7352	-2.4261	Lix1	limb and CNS expressed 1	0.186067
1370455_a_at	0.00133	0.000119	-7.46773	1.28505	-2.42498	Olfm3	olfactomedin 3	0.186213
1370161_at	0.00143	0.000132	-7.35005	1.17207	-2.41306	Ccdc80	coiled-coil domain containing 80	0.187757
1384247_at	3.97e-05	2.37e-07	-18.4446	7.90608	-2.40525			0.188777
1369783_a_at	0.00126	0.000109	-7.56686	1.37909	-2.39416	Nrg1	neuregulin 1	0.190233
1368801_at	0.0636	0.0182	-3.03755	-4.17223	-2.39152	Cxxc4	CXXC finger protein 4	0.190582
1392295_a_at	0.0125	0.00236	-4.56904	-1.98596	-2.38967			0.190826
1395819_at	3.97e-05	2.26e-07	-18.5676	7.95342	-2.38472			0.191482
1396388_at	0.000271	1.01e-05	-10.7939	3.97437	-2.38418	Kctd4	potassium channel tetramerization domain containing 4	0.191553
1391153_at	0.00028	1.06e-05	-10.7193	3.92301	-2.37682			0.192533
1374558_at	0.00217	0.000233	-6.72472	0.54653	-2.37388	Icoslg	inducible T-cell co-stimulator ligand	0.192926
1383418_at	0.000615	3.73e-05	-8.90188	2.55423	-2.36895	Adam11	ADAM metallopeptidase domain 11	0.193587
1393783_at	0.0104	0.00186	-4.76892	-1.72401	-2.36792	Cntnap2	contactin associated protein-like 2	0.193725
1371057_at	0.00084	5.87e-05	-8.31815	2.06041	-2.36358	Gabra5	gamma-aminobutyric acid type A receptor alpha 5 subunit	0.194308
1394961_at	0.000554	3.19e-05	-9.11168	2.72474	-2.35975			0.194825
1387886_at	0.00192	0.000197	-6.90567	0.73204	-2.35858	Prelp	proline and arginine rich end leucine rich repeat protein	0.194983
1387093_at	0.06	0.0169	-3.08728	-4.09719	-2.35233	Slco1a2	solute carrier organic anion transporter family, member 1A2	0.195829
1397614_at	0.000879	6.31e-05	-8.22646	1.98012	-2.3516	Gabra2	gamma-aminobutyric acid type A receptor alpha2 subunit	0.195928
1393262_at	0.000411	1.97e-05	-9.78408	3.24817	-2.35037	Smad9	SMAD family member 9	0.196096
1375707_at	0.00442	0.000613	-5.75727	-0.51277	-2.34827			0.196381
1390369_at	0.00025	8.77e-06	-11.0169	4.12598	-2.34774			0.196454
1390630_at	0.00122	0.000103	-7.63223	1.44056	-2.33556			0.19812
1371412_a_at	0.000125	2.65e-06	-13.0967	5.40839	-2.33324	Nrep	neuronal regeneration related protein	0.198438
1390849_at	0.00201	0.000211	-6.83411	0.65912	-2.33144			0.198686
1375638_at	0.0168	0.00343	-4.26968	-2.38908	-2.32377			0.199745
1377392_at	0.00696	0.00112	-5.20725	-1.16982	-2.32188	Daam2	dishevelled associated activator of morphogenesis 2	0.200006
1376844_at	0.000243	8.27e-06	-11.112	4.18968	-2.31969	Ap3b2	adaptor-related protein complex 3, beta 2 subunit	0.20031
1378774_at	0.00761	0.00126	-5.10297	-1.29917	-2.31382			0.201128
1390606_at	0.000192	5.48e-06	-11.7933	4.63116	-2.31115	Hhip	Hedgehog-interacting protein	0.201499
1374743_at	0.00205	0.000216	-6.80499	0.62928	-2.30788	Patj	PATJ, crumbs cell polarity complex component	0.201957
1380089_at	0.000476	2.52e-05	-9.43663	2.98196	-2.30578			0.202251
1370387_at	0.0077	0.00128	-5.08915	-1.31643	-2.30266	Cyp3a9	cytochrome P450, family 3, subfamily a, polypeptide 9	0.202689
1378601_at	4.06e-05	2.49e-07	-18.3161	7.85622	-2.30079	Mboat2	membrane bound O-acyltransferase domain containing 2	0.202951
1369772_at	0.000123	2.58e-06	-13.144	5.43507	-2.29768	Slc6a9	solute carrier family 6 member 9	0.20339
1393614_at	0.0448	0.0117	-3.34592	-3.71004	-2.29768	Necab3	N-terminal EF-hand calcium binding protein 3	0.20339
1385321_at	6.46e-05	7.12e-07	-15.7875	6.78333	-2.28752	Prmt8	protein arginine methyltransferase 8	0.204828
1373336_at	4.07e-05	2.58e-07	-18.2233	7.81995	-2.2871	Gprc5b	G protein-coupled receptor, class C, group 5, member B	0.204887
1392633_at	0.0121	0.00227	-4.60051	-1.94433	-2.2861			0.205029
1393777_at	0.000246	8.5e-06	-11.068	4.1603	-2.28508			0.205174
1374131_at	0.00196	0.000202	-6.87858	0.70451	-2.28182			0.205639
1379814_at	0.00437	0.000604	-5.77165	-0.49615	-2.28044	Ccdc141	coiled-coil domain containing 141	0.205835
1390763_at	0.00518	0.000757	-5.55985	-0.74382	-2.28039			0.205842
1371953_at	0.000366	1.66e-05	-10.0384	3.4375	-2.27623	Ccng2	cyclin G2	0.206437
1377451_at	0.0779	0.0235	-2.85825	-4.44397	-2.27557			0.206531
1370557_a_at	0.00428	0.000587	-5.79907	-0.46452	-2.27519	Kcnc2	potassium voltage-gated channel subfamily C member 2	0.206586
1373992_at	0.0329	0.00797	-3.62579	-3.29854	-2.27489	LOC102549198///MGC108823	interferon-inducible GTPase 1-like///similar to interferon-inducible GTPase	0.206628
1382452_at	0.0354	0.00873	-3.55896	-3.396	-2.27298	Sdpr	serum deprivation response	0.206902
1370111_at	0.00215	0.000229	-6.74322	0.56566	-2.2724			0.206985
1376425_at	0.00408	0.000551	-5.85893	-0.39584	-2.27142			0.207126
1375625_at	0.0453	0.0119	-3.33623	-3.72443	-2.26947	Paqr8	progestin and adipoQ receptor family member 8	0.207406
1393210_at	0.00384	0.000508	-5.93785	-0.306	-2.26908	LOC100910978///Ecm2	extracellular matrix protein 2-like///extracellular matrix protein 2	0.207462
1386968_at	0.00329	0.000413	-6.14057	-0.07897	-2.26815	Ppp1r1a	protein phosphatase 1, regulatory (inhibitor) subunit 1A	0.207596
1378324_at	3.27e-05	1.29e-07	-20.08	8.50639	-2.26663	Ttc30b	tetratricopeptide repeat domain 30B	0.207814
1368691_at	0.00593	0.000905	-5.39612	-0.93947	-2.26227	Gria3	glutamate ionotropic receptor AMPA type subunit 3	0.208444
1375984_at	0.00338	0.000427	-6.10797	-0.11513	-2.25841	Zfhx4	zinc finger homeobox 4	0.209003
1377751_at	0.00299	0.000365	-6.26431	0.05704	-2.24883	Reps2	RALBP1 associated Eps domain containing 2	0.210394
1397436_at	5.88e-05	6.03e-07	-16.1655	6.95575	-2.24799	Luzp2	leucine zipper protein 2	0.210517
1370540_at	0.000121	2.44e-06	-13.2531	5.49627	-2.2426	Nr1d2	nuclear receptor subfamily 1, group D, member 2	0.211305
1397555_at	0.00378	0.000498	-5.95603	-0.28542	-2.242			0.211393
1376172_at	0.0456	0.012	-3.33053	-3.73291	-2.2365	Abcg4	ATP binding cassette subfamily G member 4	0.2122
1381445_at	0.00253	0.000289	-6.503	0.314	-2.2349	Esrrg	estrogen-related receptor gamma	0.212436
1387424_at	0.000441	2.22e-05	-9.61416	3.11909	-2.23135	Cntn2	contactin 2	0.21296
1392820_at	0.00424	0.000579	-5.81261	-0.44895	-2.23129	Fgf1	fibroblast growth factor 1	0.212968
1382924_at	0.000208	6.21e-06	-11.5823	4.49721	-2.23007	Pank1	pantothenate kinase 1	0.213148
1395429_at	0.000288	1.11e-05	-10.6483	3.87379	-2.22705			0.213596
1369047_at	0.000485	2.61e-05	-9.38926	2.94497	-2.22539	Sult1d1	sulfotransferase family 1D, member 1	0.213842
1394295_at	0.00392	0.000523	-5.90966	-0.338	-2.22227	Tmem255a	transmembrane protein 255A	0.214303
1372518_at	0.00178	0.000178	-7.01922	0.84655	-2.222	Fbln1	fibulin 1	0.214344
1383824_at	0.0026	0.0003	-6.46218	0.27055	-2.21895	Ldb2	LIM domain binding 2	0.214797
1393980_at	0.0015	0.00014	-7.28265	1.10671	-2.21656			0.215154
1368395_at	0.0234	0.00521	-3.94357	-2.84274	-2.2107	Gpc3	glypican 3	0.216029
1374015_at	0.000268	9.92e-06	-10.8211	3.99302	-2.20967			0.216184
1392299_at	0.065	0.0186	-3.01942	-4.19963	-2.20829	Nos1ap	nitric oxide synthase 1 adaptor protein	0.21639
1386049_at	0.000418	2.03e-05	-9.74093	3.21559	-2.20723	Kctd4	potassium channel tetramerization domain containing 4	0.216549
1387693_a_at	0.000729	4.78e-05	-8.57908	2.28479	-2.20366	Slc6a9	solute carrier family 6 member 9	0.217086
1379597_at	0.000119	2.38e-06	-13.2969	5.52067	-2.20116	Rsrc1	arginine and serine rich coiled-coil 1	0.217463
1368249_at	0.00384	0.000508	-5.93688	-0.30711	-2.19466	Klf15	Kruppel-like factor 15	0.218445
1369633_at	0.222	0.0947	-1.92141	-5.8515	-2.19464	Cxcl12	C-X-C motif chemokine ligand 12	0.218448
1391019_at	7.04e-05	8.34e-07	-15.4403	6.62088	-2.194	Slitrk1	SLIT and NTRK-like family, member 1	0.218545
1377308_a_at	0.00107	8.49e-05	-7.86524	1.6562	-2.1931			0.218681
1396023_at	0.000726	4.74e-05	-8.58926	2.29342	-2.18825			0.219417
1396135_at	0.00633	0.000984	-5.32109	-1.03038	-2.18631			0.219713
1393897_at	0.00103	7.97e-05	-7.94036	1.72458	-2.18482	Cdh20	cadherin 20	0.219939
1398480_at	0.00174	0.000172	-7.05203	0.87936	-2.18271	Lrrc24	leucine rich repeat containing 24	0.220261
1379026_at	0.000538	3.05e-05	-9.17335	2.77418	-2.17994	Rhbdl3	rhomboid like 3	0.220684
1392965_a_at	0.102	0.0329	-2.62953	-4.79207	-2.17884	LOC100910861///LOC100909873///Smoc2	SPARC-related modular calcium-binding protein 2-like///SPARC-related modular calcium-binding protein 2-like///SPARC related modular calcium binding 2	0.220853
1379370_at	0.000307	1.25e-05	-10.4675	3.747	-2.17828	Sspn	sarcospan	0.220938
1389803_at	6.35e-05	6.82e-07	-15.887	6.82916	-2.17816			0.220957
1378252_at	0.029	0.00681	-3.74213	-3.13018	-2.17795	Chodl	chondrolectin	0.220989
1388880_at	0.000308	1.26e-05	-10.45	3.73461	-2.17663	Slfn5	schlafen family member 5	0.221192
1389049_at	0.00193	0.000199	-6.89754	0.72378	-2.17431			0.221549
1376120_at	0.000146	3.42e-06	-12.625	5.13664	-2.17335	Fam69b	family with sequence similarity 69, member B	0.221695
1382453_at	0.0027	0.000317	-6.40613	0.21055	-2.17094	Zic3	Zic family member 3	0.222066
1388263_at	0.0167	0.0034	-4.27668	-2.37951	-2.17081	Kcna6	potassium voltage-gated channel subfamily A member 6	0.222086
1383554_at	0.00225	0.000245	-6.67368	0.49351	-2.17	Rnf128	ring finger protein 128, E3 ubiquitin protein ligase	0.22221
1373635_at	0.0574	0.016	-3.12769	-4.03633	-2.16505	Mypop	Myb-related transcription factor, partner of profilin	0.222975
1374930_at	0.000756	5.06e-05	-8.5055	2.22213	-2.16337	Shisa9	shisa family member 9	0.223234
1368306_at	0.00168	0.000164	-7.11022	0.93728	-2.16238	Grin2c	glutamate ionotropic receptor NMDA type subunit 2C	0.223388
1379070_at	0.0027	0.000318	-6.40435	0.20865	-2.1617	Zfp488	zinc finger protein 488	0.223493
1388189_at	9.79e-05	1.67e-06	-13.987	5.8945	-2.16125	Grm3	glutamate metabotropic receptor 3	0.223563
1385043_at	0.0152	0.00303	-4.36643	-2.25739	-2.15808	Patj	PATJ, crumbs cell polarity complex component	0.224055
1385285_at	0.00104	8.19e-05	-7.90859	1.69573	-2.15427	LOC102556832///Lmo3	LIM domain only protein 3-like///LIM domain only 3	0.224647
1379107_at	0.0493	0.0132	-3.26136	-3.83597	-2.15186			0.225022
1384755_at	0.00541	0.000801	-5.50777	-0.80565	-2.15082	Prrt2	proline-rich transmembrane protein 2	0.225185
1393291_at	0.0157	0.00314	-4.33761	-2.29649	-2.15072	Ube2ql1	ubiquitin-conjugating enzyme E2Q family-like 1	0.2252
1379719_at	0.019	0.00399	-4.14941	-2.55467	-2.15008			0.225299
1369798_at	0.00245	0.000275	-6.55341	0.36738	-2.14478	Atp1b2	ATPase Na+/K+ transporting subunit beta 2	0.226129
1378796_at	0.000448	2.28e-05	-9.57664	3.0903	-2.14236	Omg	oligodendrocyte-myelin glycoprotein	0.226508
1382706_at	0.000117	2.31e-06	-13.3576	5.55434	-2.14194			0.226575
1398613_at	1.18e-05	1.18e-08	-28.0704	10.74	-2.1416			0.226628
1395201_at	0.000529	2.98e-05	-9.20362	2.79835	-2.13647	Sspn	sarcospan	0.227435
1385912_at	0.000142	3.25e-06	-12.7176	5.19082	-2.13621	Dusp15	dual specificity phosphatase 15	0.227477
1390397_at	0.00204	0.000215	-6.8114	0.63586	-2.12899	Syndig1	synapse differentiation inducing 1	0.228617
1373659_at	9.66e-05	1.62e-06	-14.0509	5.92811	-2.12851	Smim5	small integral membrane protein 5	0.228693
1393434_at	0.00287	0.000344	-6.32439	0.12237	-2.126			0.229092
1397554_at	0.0028	0.000333	-6.35598	0.15655	-2.12553			0.229167
1376873_at	0.00133	0.000119	-7.47086	1.28804	-2.11928	Cbln1	cerebellin 1 precursor	0.230161
1383356_at	3.66e-05	1.68e-07	-19.3604	8.24981	-2.1181	Enho	energy homeostasis associated	0.23035
1390951_at	0.00133	0.000119	-7.4703	1.2875	-2.11282			0.231195
1390037_at	0.000192	5.46e-06	-11.8013	4.63618	-2.11187	Nkain4	Na+/K+ transporting ATPase interacting 4	0.231347
1394727_at	0.000648	4.01e-05	-8.80554	2.47474	-2.11166			0.231381
1384501_at	4.94e-05	4.26e-07	-16.9779	7.3113	-2.10861	Hecw2	HECT, C2 and WW domain containing E3 ubiquitin protein ligase 2	0.23187
1394609_at	9.41e-05	1.53e-06	-14.1635	5.98698	-2.10766	Ablim2	actin binding LIM protein family, member 2	0.232023
1380253_at	0.000104	1.88e-06	-13.7568	5.77202	-2.10549			0.232372
1379711_at	0.00763	0.00126	-5.10017	-1.30267	-2.10464			0.232509
1374039_at	0.000106	1.94e-06	-13.6954	5.73897	-2.10114	Car14	carbonic anhydrase 14	0.233074
1382422_at	4.9e-05	4.09e-07	-17.0769	7.3533	-2.10007			0.233247
1373839_at	0.000303	1.22e-05	-10.4978	3.76837	-2.09343	Igdcc4	immunoglobulin superfamily, DCC subclass, member 4	0.234323
1380570_at	0.00147	0.000136	-7.31306	1.13627	-2.09314			0.23437
1378131_at	0.00237	0.000262	-6.6032	0.41981	-2.09144	Slc9a9	solute carrier family 9 member A9	0.234647
1382478_at	4.47e-05	3.27e-07	-17.6257	7.58112	-2.08687	Btbd3	BTB domain containing 3	0.23539
1378045_at	0.037	0.00924	-3.51734	-3.45697	-2.08248	C1ql1	complement C1q like 1	0.236108
1379900_at	0.00202	0.000212	-6.82954	0.65445	-2.08172	Aldh5a1	aldehyde dehydrogenase 5 family, member A1	0.236232
1374218_at	0.00494	0.000712	-5.61702	-0.67636	-2.07969			0.236565
1377472_at	0.00045	2.31e-05	-9.55939	3.07704	-2.07781	Extl1	exostosin-like glycosyltransferase 1	0.236873
1377421_at	0.000127	2.71e-06	-13.0517	5.38291	-2.0695			0.238241
1378909_at	0.00284	0.000338	-6.34007	0.13935	-2.06806			0.23848
1390477_at	0.00344	0.000436	-6.08566	-0.13994	-2.06633			0.238766
1396612_at	0.0215	0.00469	-4.02411	-2.72933	-2.06511	Ank2	ankyrin 2, neuronal	0.238969
1388212_a_at	0.00616	0.000953	-5.35011	-0.99513	-2.06387	RT1-S3	RT1 class Ib, locus S3	0.239173
1376285_at	0.0238	0.00535	-3.92424	-2.87008	-2.06353	Gulp1	GULP, engulfment adaptor PTB domain containing 1	0.239229
1397226_at	0.00281	0.000333	-6.35508	0.15557	-2.06071	Dock4	dedicator of cytokinesis 4	0.239698
1370802_at	7.94e-05	1.06e-06	-14.9283	6.37381	-2.06039	Itgb5	integrin subunit beta 5	0.239751
1398430_at	0.00209	0.000222	-6.77787	0.60141	-2.05869	Myo6	myosin VI	0.240034
1385072_at	0.000992	7.6e-05	-7.99837	1.77702	-2.05858	Galm	galactose mutarotase	0.240053
1375934_at	3.52e-05	1.44e-07	-19.7803	8.40092	-2.05811	Rnf128	ring finger protein 128, E3 ubiquitin protein ligase	0.24013
1388176_at	0.00361	0.000468	-6.01692	-0.21682	-2.05692	Nat8f5	N-acetyltransferase 8 (GCN5-related) family member 5	0.240328
1381576_at	0.0264	0.00606	-3.82986	-3.00433	-2.05612	Pik3c2b	phosphatidylinositol-4-phosphate 3-kinase, catalytic subunit type 2 beta	0.240462
1388004_at	0.00118	9.87e-05	-7.6856	1.49044	-2.0553	Gpr37l1	G protein-coupled receptor 37-like 1	0.240598
1371922_at	0.00477	0.000677	-5.66362	-0.62172	-2.05477			0.240687
1390401_at	0.0004	1.89e-05	-9.84443	3.29351	-2.05236	Slc25a27	solute carrier family 25, member 27	0.24109
1378689_at	0.0393	0.00992	-3.46579	-3.53274	-2.05196			0.241156
1378144_at	0.000572	3.33e-05	-9.054	2.67822	-2.05039			0.241419
1387685_at	0.00189	0.000192	-6.93199	0.75871	-2.04748	Ncs1	neuronal calcium sensor 1	0.241907
1387811_at	8.59e-05	1.27e-06	-14.5415	6.18091	-2.04544	Agt	angiotensinogen	0.242249
1379445_at	0.00131	0.000116	-7.49863	1.31448	-2.04314			0.242635
1387913_at	0.000421	2.06e-05	-9.72425	3.20296	-2.04168	Cyp2d4	cytochrome P450, family 2, subfamily d, polypeptide 4	0.242881
1394668_at	0.0166	0.00338	-4.28108	-2.37351	-2.03933	Cadm3	cell adhesion molecule 3	0.243277
1383059_a_at	0.00533	0.000785	-5.52624	-0.78368	-2.03852	Gkap1	G kinase anchoring protein 1	0.243413
1377374_at	4.95e-05	4.3e-07	-16.9555	7.30173	-2.03755			0.243576
1373642_at	0.000233	7.73e-06	-11.2203	4.26164	-2.03663	Paqr6	progestin and adipoQ receptor family member 6	0.243732
1393910_at	0.0213	0.00465	-4.03117	-2.71943	-2.03567	Fam13a	family with sequence similarity 13, member A	0.243894
1378480_at	0.000147	3.46e-06	-12.6034	5.12396	-2.03534			0.243951
1368476_at	0.000118	2.34e-06	-13.3273	5.53758	-2.03437	Nr3c2	nuclear receptor subfamily 3, group C, member 2	0.244115
1391506_at	0.000432	2.14e-05	-9.66603	3.15872	-2.03159			0.244585
1368000_at	0.00178	0.000177	-7.0235	0.85084	-2.03126	C3	complement component 3	0.244641
1380433_at	0.0057	0.000863	-5.44013	-0.88652	-2.03041			0.244786
1376747_at	0.00174	0.000172	-7.05533	0.88266	-2.03013			0.244833
1373991_at	0.000189	5.31e-06	-11.8477	4.66531	-2.02971	Kcnj16	potassium voltage-gated channel subfamily J member 16	0.244904
1389423_at	0.0328	0.00794	-3.62841	-3.29474	-2.02908	Ddr2	discoidin domain receptor tyrosine kinase 2	0.245012
1391154_at	0.000183	5.01e-06	-11.9494	4.72871	-2.02776			0.245236
1390306_at	0.0152	0.00302	-4.36927	-2.25355	-2.02507	Flrt2	fibronectin leucine rich transmembrane protein 2	0.245694
1393765_at	0.00257	0.000295	-6.48023	0.28978	-2.02347			0.245965
1369408_at	0.00503	0.000727	-5.59764	-0.69917	-2.02248	Brinp1	BMP/retinoic acid inducible neural specific 1	0.246135
1395447_at	8.46e-05	1.24e-06	-14.5966	6.20873	-2.02075	Ermn	ermin	0.24643
1368618_at	0.00255	0.000291	-6.49413	0.30458	-2.02028	Grb14	growth factor receptor bound protein 14	0.246511
1370155_at	0.0621	0.0176	-3.05869	-4.14032	-2.01967	Col1a2	collagen type I alpha 2 chain	0.246614
1377857_at	0.00376	0.000495	-5.96328	-0.27724	-2.01462	Tmem196	transmembrane protein 196	0.24748
1397665_at	0.0548	0.015	-3.16934	-3.97375	-2.01194			0.247939
1398511_at	0.0209	0.00452	-4.05231	-2.68983	-2.01182	Susd2	sushi domain containing 2	0.24796
1383363_at	0.0167	0.0034	-4.2764	-2.3799	-2.01176			0.247971
1389735_at	0.0161	0.00325	-4.31105	-2.3326	-2.01059	Rps6ka6	ribosomal protein S6 kinase A6	0.248172
1373427_at	0.002	0.000208	-6.84732	0.67263	-2.00713	Rragd	Ras-related GTP binding D	0.248767
1390740_at	0.121	0.0411	-2.48011	-5.01935	-2.00581			0.248996
1373790_at	0.00018	4.86e-06	-12.0016	4.76104	-2.00313	Car14	carbonic anhydrase 14	0.249459
1393227_at	0.00661	0.00104	-5.26936	-1.09352	-2.0027			0.249533
1368378_at	0.000107	1.97e-06	-13.6639	5.72199	-2.00008	Aldh1l1	aldehyde dehydrogenase 1 family, member L1	0.249986
1368729_a_at	0.0331	0.00806	-3.61782	-3.31014	-1.99718	Adcyap1r1	adenylate cyclase activating polypeptide 1 receptor type 1	0.250489
1397542_at	0.00137	0.000124	-7.42253	1.24182	-1.99599			0.250696
1385256_at	0.000542	3.09e-05	-9.15581	2.76015	-1.99598			0.250698
1393607_at	0.00118	9.84e-05	-7.68957	1.49413	-1.9911			0.251546
1389905_at	0.000759	5.1e-05	-8.4961	2.21408	-1.99109			0.251548
1395029_at	0.00225	0.000245	-6.6743	0.49416	-1.99085			0.251591
1379250_at	0.0012	0.000101	-7.65844	1.46509	-1.99074	Galm	galactose mutarotase	0.251609
1385604_at	0.00231	0.000253	-6.63854	0.45684	-1.98907			0.251901
1391472_at	0.00556	0.000832	-5.47318	-0.84693	-1.98584	Dzip1	DAZ interacting zinc finger protein 1	0.252466
1372297_at	0.000482	2.59e-05	-9.40085	2.95403	-1.98243	Gsta4	glutathione S-transferase alpha 4	0.253063
1368154_at	0.000302	1.21e-05	-10.5184	3.78293	-1.98243	Gucy1a3	guanylate cyclase 1 soluble subunit alpha 3	0.253064
1368120_at	0.0089	0.00154	-4.92669	-1.52136	-1.98035	Nell1	neural EGFL like 1	0.253429
1373288_at	0.00416	0.000565	-5.83497	-0.42327	-1.9792	St5	suppression of tumorigenicity 5	0.25363
1380400_at	0.00287	0.000345	-6.32127	0.11899	-1.97374			0.254591
1385923_at	0.00241	0.000269	-6.57655	0.39179	-1.97374	Id4	inhibitor of DNA binding 4, HLH protein	0.254592
1388213_a_at	0.0964	0.0307	-2.67618	-4.72104	-1.97276	RT1-S3	RT1 class Ib, locus S3	0.254765
1384052_at	0.0115	0.00212	-4.65746	-1.86937	-1.97165	Osbpl6	oxysterol binding protein-like 6	0.254961
1385323_at	0.0196	0.00417	-4.11543	-2.60182	-1.97037			0.255187
1372874_at	0.000164	4.13e-06	-12.2846	4.93397	-1.96743	Akt3	AKT serine/threonine kinase 3	0.255708
1383200_at	0.0256	0.00582	-3.86044	-2.96071	-1.96574	Ccdc81	coiled-coil domain containing 81	0.256007
1371942_at	0.00265	0.000308	-6.43455	0.24103	-1.96531	Gstt3	glutathione S-transferase, theta 3	0.256084
1368425_at	6.35e-05	6.86e-07	-15.8733	6.82288	-1.96315	Caskin1	CASK interacting protein 1	0.256467
1388000_at	4.26e-05	2.95e-07	-17.8805	7.68408	-1.9622	Slc24a2	solute carrier family 24 member 2	0.256636
1383453_at	0.00162	0.000155	-7.16797	0.99438	-1.9618	Olfml1	olfactomedin-like 1	0.256708
1376901_a_at	5.51e-05	5.28e-07	-16.4726	7.0925	-1.96099	Elfn2	extracellular leucine-rich repeat and fibronectin type III domain containing 2	0.256853
1380577_at	0.00048	2.57e-05	-9.40861	2.9601	-1.96055	Abcg2	ATP-binding cassette, subfamily G (WHITE), member 2	0.25693
1370464_at	0.00309	0.00038	-6.22224	0.01101	-1.95944	Abcb1a	ATP binding cassette subfamily B member 1A	0.257128
1383385_at	0.00253	0.000289	-6.50221	0.31316	-1.95793			0.257397
1369811_at	0.0076	0.00126	-5.10371	-1.29825	-1.95654	Cplx1	complexin 1	0.257646
1395745_at	0.000811	5.56e-05	-8.38455	2.11809	-1.95613			0.257719
1396119_at	0.00242	0.000271	-6.569	0.38383	-1.9524			0.258385
1397177_at	0.00366	0.000478	-5.9969	-0.23933	-1.95157	Cdh7	cadherin 7	0.258534
1370302_at	4.06e-05	2.49e-07	-18.3115	7.85444	-1.94866	Shroom2	shroom family member 2	0.259057
1380866_at	0.00555	0.00083	-5.47597	-0.8436	-1.94802	LOC365985	similar to adenylate kinase 5 isoform 1	0.259171
1368759_at	0.0203	0.00435	-4.08216	-2.64814	-1.94737	Cacng2	calcium voltage-gated channel auxiliary subunit gamma 2	0.259288
1370047_at	0.0137	0.00265	-4.47594	-2.10995	-1.94613	Enpp1	ectonucleotide pyrophosphatase/phosphodiesterase 1	0.259512
1383110_at	0.00129	0.000113	-7.52962	1.34388	-1.94576	Klhl24	kelch-like family member 24	0.259578
1370328_at	0.00175	0.000174	-7.0435	0.87084	-1.94552	Dkk3	dickkopf WNT signaling pathway inhibitor 3	0.259621
1382358_at	0.0113	0.00207	-4.67704	-1.84371	-1.94527			0.259666
1381591_at	0.000153	3.69e-06	-12.4884	5.05596	-1.94363			0.259962
1379318_at	9.17e-05	1.45e-06	-14.2669	6.04057	-1.9427	Tdrp	testis development related protein	0.260129
1383164_at	0.0037	0.000484	-5.98442	-0.25338	-1.94173	Arhgef26	Rho guanine nucleotide exchange factor 26	0.260304
1382382_at	5.37e-06	2.25e-09	-35.331	12.102	-1.9409	Ermn	ermin	0.260453
1391575_at	0.00886	0.00154	-4.93058	-1.51641	-1.94027	Hapln4	hyaluronan and proteoglycan link protein 4	0.260568
1382458_at	0.00216	0.000231	-6.73786	0.56012	-1.93954			0.260699
1385033_at	0.00261	0.000303	-6.45413	0.26195	-1.9393			0.260742
1380852_at	0.00718	0.00116	-5.17258	-1.21266	-1.93824	Ralyl	RALY RNA binding protein-like	0.260934
1390645_at	0.000573	3.35e-05	-9.04674	2.67234	-1.93739			0.261088
1385126_at	9.12e-05	1.44e-06	-14.2835	6.04916	-1.93645			0.261259
1392148_at	2.05e-05	4.75e-08	-23.1023	9.47069	-1.93162			0.262134
1370775_a_at	0.037	0.00924	-3.51748	-3.45676	-1.92549	Calca	calcitonin-related polypeptide alpha	0.263252
1383234_at	0.000271	1.01e-05	-10.7944	3.97476	-1.92338			0.263636
1378714_at	0.0118	0.00221	-4.62501	-1.91202	-1.92337	Mrap2	melanocortin 2 receptor accessory protein 2	0.263638
1395509_at	0.000433	2.15e-05	-9.66217	3.15578	-1.92293			0.263719
1390512_at	0.0311	0.00744	-3.67692	-3.22435	-1.91645	Asah2	N-acylsphingosine amidohydrolase 2	0.264905
1395726_at	0.01	0.00178	-4.80464	-1.67782	-1.91638			0.264918
1388426_at	0.000998	7.67e-05	-7.98736	1.76709	-1.91633	Srebf1	sterol regulatory element binding transcription factor 1	0.264929
1393167_at	0.00688	0.0011	-5.22078	-1.15316	-1.91613			0.264965
1372481_at	0.0481	0.0128	-3.28342	-3.80305	-1.91429			0.265303
1379495_at	0.0011	8.89e-05	-7.80947	1.60507	-1.9133			0.265484
1370609_a_at	0.0109	0.00197	-4.71987	-1.78776	-1.91002	Slc16a7	solute carrier family 16 member 7	0.266089
1369904_at	7.3e-05	9.06e-07	-15.2586	6.53424	-1.90963	Gabrb1	gamma-aminobutyric acid type A receptor beta 1 subunit	0.26616
1398412_at	8.65e-05	1.29e-06	-14.5041	6.16198	-1.90667	Rnf182	ring finger protein 182	0.266707
1388644_at	0.000409	1.96e-05	-9.79375	3.25546	-1.90446	Mgll	monoglyceride lipase	0.267117
1380250_at	0.00124	0.000106	-7.59918	1.40954	-1.9038	Sned1	sushi, nidogen and EGF-like domains 1	0.267239
1370076_at	0.00394	0.000527	-5.9028	-0.3458	-1.9009	Kcnj16	potassium voltage-gated channel subfamily J member 16	0.267777
1392045_at	0.0082	0.00139	-5.01622	-1.40796	-1.90055	Slc35g2	solute carrier family 35, member G2	0.267841
1397439_at	0.000909	6.64e-05	-8.16382	1.92482	-1.9	Dgke	diacylglycerol kinase epsilon	0.267943
1378888_at	0.0134	0.00259	-4.49524	-2.08414	-1.89986			0.26797
1387934_at	0.000444	2.24e-05	-9.60242	3.11009	-1.89125	LOC100910284///Bcan	brevican core protein-like///brevican	0.269573
1384913_at	0.00381	0.000502	-5.9483	-0.29417	-1.89109	Amot	angiomotin	0.269603
1384470_at	0.00446	0.000623	-5.74309	-0.52919	-1.89082	Maneal	mannosidase, endo-alpha-like	0.269653
1374910_at	0.000528	2.97e-05	-9.21035	2.80371	-1.89024			0.269763
1385547_at	3.97e-05	2.37e-07	-18.4361	7.9028	-1.88968	Ermn	ermin	0.269866
1391656_at	0.000414	2.01e-05	-9.7608	3.23061	-1.88718	Cpm	carboxypeptidase M	0.270335
1393482_at	0.000194	5.57e-06	-11.7656	4.61369	-1.88672	Fam163b	family with sequence similarity 163, member B	0.270422
1388188_at	0.00517	0.000754	-5.56422	-0.73865	-1.88527	Cyp7b1	cytochrome P450, family 7, subfamily b, polypeptide 1	0.270693
1387476_at	2.05e-05	4.5e-08	-23.277	9.52144	-1.88488	Kcnd2	potassium voltage-gated channel subfamily D member 2	0.270767
1370558_a_at	0.0144	0.00283	-4.42282	-2.18124	-1.88455	Kcnc2	potassium voltage-gated channel subfamily C member 2	0.270828
1388618_at	0.00182	0.000184	-6.98337	0.81055	-1.88236	Nid2	nidogen 2	0.27124
1368182_at	9.87e-05	1.71e-06	-13.9427	5.87111	-1.88168	Acsl6	acyl-CoA synthetase long-chain family member 6	0.271367
1380861_at	0.000266	9.82e-06	-10.8377	4.00442	-1.88076	Grin2a	glutamate ionotropic receptor NMDA type subunit 2A	0.27154
1377163_at	0.00138	0.000125	-7.41001	1.22982	-1.87839	Inhbb	inhibin beta B subunit	0.271987
1394252_at	8.24e-05	1.16e-06	-14.7284	6.27482	-1.8778	Spock3	sparc/osteonectin, cwcv and kazal-like domains proteoglycan (testican) 3	0.272098
1377342_s_at	0.0134	0.00257	-4.49941	-2.07857	-1.87736	Fnbp1	formin binding protein 1	0.272181
1368882_at	0.00254	0.00029	-6.49698	0.3076	-1.87719	St6galnac3	ST6 N-acetylgalactosaminide alpha-2,6-sialyltransferase 3	0.272214
1393798_at	0.0356	0.00881	-3.55197	-3.40624	-1.87674	Atrx	ATRX, chromatin remodeler	0.272298
1393259_at	0.00311	0.000383	-6.21561	0.00374	-1.8717			0.273251
1396542_at	0.00666	0.00105	-5.25995	-1.10504	-1.87138			0.273313
1387397_at	0.000909	6.63e-05	-8.16524	1.92608	-1.86796	Aqp4	aquaporin 4	0.27396
1395381_at	0.0307	0.00729	-3.69147	-3.2033	-1.86588			0.274356
1392739_a_at	0.00015	3.56e-06	-12.5496	5.09224	-1.86545	Eepd1	endonuclease/exonuclease/phosphatase family domain containing 1	0.274438
1376141_at	0.00349	0.000444	-6.06842	-0.15917	-1.8639			0.274732
1374724_at	0.000364	1.64e-05	-10.0574	3.45151	-1.86248	Mapk4	mitogen-activated protein kinase 4	0.275004
1393626_at	0.0002	5.86e-06	-11.6794	4.55912	-1.86222	Sorl1	sortilin related receptor 1	0.275054
1368981_at	0.000298	1.18e-05	-10.5568	3.80988	-1.86042	Aqp4	aquaporin 4	0.275396
1383750_at	6.84e-05	8e-07	-15.5292	6.66288	-1.86028			0.275423
1398597_at	0.000692	4.42e-05	-8.68093	2.37075	-1.86023	Rnf144a	ring finger protein 144A	0.275432
1387802_at	0.000307	1.25e-05	-10.4668	3.7465	-1.85707	Dlgap1	DLG associated protein 1	0.276036
1368964_at	8.34e-05	1.21e-06	-14.6481	6.23466	-1.85633	Lrrn3	leucine rich repeat neuronal 3	0.276178
1371018_at	0.00194	0.000199	-6.89317	0.71935	-1.85396	Celsr2	cadherin, EGF LAG seven-pass G-type receptor 2	0.276632
1387689_at	0.0227	0.00503	-3.97085	-2.80422	-1.85253	Kcnab2	potassium voltage-gated channel subfamily A regulatory beta subunit 2	0.276906
1372254_at	0.108	0.0355	-2.57937	-4.86843	-1.8524	Serping1	serpin family G member 1	0.276932
1384822_at	0.00157	0.000149	-7.21697	1.04255	-1.85214			0.276981
1368554_at	0.0191	0.00402	-4.14395	-2.56223	-1.85081	Pnlip	pancreatic lipase	0.277237
1384683_at	0.00195	0.000201	-6.88531	0.71135	-1.84641			0.278083
1397367_at	0.0133	0.00255	-4.50794	-2.06719	-1.84627	Adam23	ADAM metallopeptidase domain 23	0.278111
1388116_at	0.145	0.052	-2.32224	-5.25831	-1.84496	Col1a1	collagen, type I, alpha 1	0.278364
1375120_at	0.00014	3.18e-06	-12.7545	5.21225	-1.84494	Id4	inhibitor of DNA binding 4, HLH protein	0.278367
1397599_at	0.0338	0.00826	-3.59981	-3.33638	-1.84483			0.278388
1368170_at	0.000327	1.38e-05	-10.314	3.63767	-1.84401	Slc6a1	solute carrier family 6 member 1	0.278547
1379894_at	0.000252	8.91e-06	-10.9911	4.10856	-1.84394	RGD1310110	similar to 3632451O06Rik protein	0.27856
1393820_at	0.00139	0.000127	-7.39704	1.21736	-1.84299			0.278744
1390050_at	0.00294	0.000355	-6.29117	0.0863	-1.8418	Golm1	golgi membrane protein 1	0.278973
1398458_at	0.000264	9.72e-06	-10.8536	4.01524	-1.84084	Wnk2	WNK lysine deficient protein kinase 2	0.279158
1368993_at	0.00447	0.000624	-5.74016	-0.53259	-1.84077	Tenm2	teneurin transmembrane protein 2	0.279173
1393075_at	0.00202	0.000213	-6.82429	0.64907	-1.83874			0.279566
1387874_at	0.00141	0.00013	-7.37104	1.19233	-1.83743	Dbp	D-box binding PAR bZIP transcription factor	0.27982
1388145_at	0.0152	0.00302	-4.36979	-2.25284	-1.83708	Tnxb	tenascin XB	0.279887
1375729_at	0.00144	0.000133	-7.3391	1.16149	-1.83708	Epha4	Eph receptor A4	0.279887
1387224_at	4.64e-05	3.54e-07	-17.429	7.50043	-1.83383	Dgkb	diacylglycerol kinase, beta	0.280519
1374633_at	0.00233	0.000257	-6.62555	0.44324	-1.83375	Pm20d2	peptidase M20 domain containing 2	0.280535
1397663_at	0.00591	0.000901	-5.40073	-0.93391	-1.83359	Kcnab2	potassium voltage-gated channel subfamily A regulatory beta subunit 2	0.280565
1387467_at	0.0971	0.031	-2.66934	-4.73145	-1.83154	Kcnj10	potassium voltage-gated channel subfamily J member 10	0.280965
1379465_at	0.0116	0.00215	-4.64583	-1.88464	-1.8314			0.280991
1379517_at	0.00158	0.000151	-7.19915	1.02506	-1.8305	Rgs6	regulator of G-protein signaling 6	0.281167
1372585_at	0.000668	4.18e-05	-8.75217	2.43036	-1.83038	LOC100910973	uncharacterized LOC100910973	0.28119
1385799_at	0.000961	7.2e-05	-8.06426	1.83619	-1.8299	Nxph1	neurexophilin 1	0.281284
1392933_a_at	0.00112	9.03e-05	-7.79048	1.5876	-1.82982	Bcl7a	BCL tumor suppressor 7A	0.2813
1370145_at	0.0139	0.0027	-4.45925	-2.1323	-1.82971	Zfp354c	zinc finger protein 354C	0.28132
1374681_at	0.000432	2.14e-05	-9.66515	3.15804	-1.82902	Adcyap1r1	adenylate cyclase activating polypeptide 1 receptor type 1	0.281455
1368840_at	0.00172	0.00017	-7.07021	0.8975	-1.82789	Tmem176b	transmembrane protein 176B	0.281676
1379052_at	5.74e-05	5.79e-07	-16.2597	6.99797	-1.8273			0.281792
1387383_at	0.00907	0.00158	-4.90667	-1.54687	-1.82695	Gabbr2	gamma-aminobutyric acid type B receptor subunit 2	0.28186
1395126_at	0.279	0.154	-1.59006	-6.31334	-1.8261	Fcrl2	Fc receptor-like 2	0.282026
1367660_at	0.000399	1.89e-05	-9.84911	3.29702	-1.82476	Fabp3	fatty acid binding protein 3	0.282287
1377950_at	0.0149	0.00295	-4.38937	-2.22635	-1.82388	LOC100910934///RGD1309362	interferon-inducible GTPase 1-like///similar to interferon-inducible GTPase	0.282461
1383121_at	0.0012	0.000102	-7.65034	1.45752	-1.82193			0.282842
1368135_at	0.00336	0.000423	-6.11633	-0.10584	-1.82187	Ninj2	ninjurin 2	0.282854
1384296_at	0.000284	1.08e-05	-10.6912	3.90359	-1.82091			0.283043
1389474_at	0.0518	0.014	-3.21966	-3.89832	-1.82044	Mylip	myosin regulatory light chain interacting protein	0.283135
1371855_at	0.000704	4.53e-05	-8.64894	2.34385	-1.81885			0.283447
1394941_at	0.00122	0.000104	-7.6212	1.43023	-1.81844			0.283528
1378592_at	0.000353	1.55e-05	-10.1385	3.51085	-1.81437	Trim59	tripartite motif-containing 59	0.284328
1369968_at	0.0015	0.000139	-7.28912	1.11301	-1.81431	Ptn	pleiotrophin	0.28434
1371123_x_at	0.0326	0.00789	-3.63327	-3.28767	-1.81318	RT1-S3	RT1 class Ib, locus S3	0.284562
1380317_at	0.00292	0.000351	-6.30263	0.09876	-1.81189	Cdh10	cadherin 10	0.284817
1372095_at	0.000109	2.05e-06	-13.5836	5.6784	-1.81119	RGD1309821	similar to KIAA1161 protein	0.284955
1392510_at	0.191	0.0753	-2.07557	-5.62653	-1.8106	Fam180a	family with sequence similarity 180, member A	0.285072
1372583_at	0.001	7.73e-05	-7.97714	1.75787	-1.81011	Tmtc1	transmembrane and tetratricopeptide repeat containing 1	0.28517
1372002_at	0.000161	3.97e-06	-12.3554	4.97658	-1.80882	Gja1	gap junction protein, alpha 1	0.285424
1385585_at	7.21e-05	8.85e-07	-15.3086	6.55819	-1.80682	Hlf	HLF, PAR bZIP transcription factor	0.28582
1379971_at	0.00119	0.000101	-7.66412	1.47039	-1.80493	Zc3h6	zinc finger CCCH type containing 6	0.286194
1378355_a_at	0.0089	0.00154	-4.92638	-1.52175	-1.80449	Slc24a4	solute carrier family 24 member 4	0.286283
1369993_at	0.000331	1.41e-05	-10.2841	3.61621	-1.80195	LOC100909586///Camk2g	calcium/calmodulin-dependent protein kinase type II subunit gamma-like///calcium/calmodulin-dependent protein kinase II gamma	0.286787
1388527_at	0.000739	4.87e-05	-8.5554	2.26467	-1.80156			0.286864
1395528_at	0.000625	3.82e-05	-8.87159	2.52933	-1.7987			0.287433
1391458_at	0.000875	6.25e-05	-8.23875	1.99092	-1.79813	Ndrg1	N-myc downstream regulated 1	0.287546
1398486_at	0.00453	0.000634	-5.72577	-0.54928	-1.79624	Mia3	MIA family member 3, ER export factor	0.287923
1387040_at	0.00311	0.000382	-6.21774	0.00607	-1.79577	Mal	mal, T-cell differentiation protein	0.288018
1381974_at	3.66e-05	1.7e-07	-19.3306	8.23895	-1.79543	Btbd3	BTB domain containing 3	0.288086
1393056_at	0.00755	0.00124	-5.1127	-1.28703	-1.79078			0.289017
1390127_at	0.000171	4.42e-06	-12.1668	4.8625	-1.79041	Dixdc1	DIX domain containing 1	0.289091
1398500_at	0.00377	0.000496	-5.96134	-0.27942	-1.78439	Adgrf5	adhesion G protein-coupled receptor F5	0.290298
1369192_at	0.0664	0.0192	-2.99944	-4.22984	-1.78435	Cdkn1b	cyclin-dependent kinase inhibitor 1B	0.290306
1383743_at	0.000492	2.65e-05	-9.36622	2.92691	-1.78105	Carmil1	capping protein regulator and myosin 1 linker 1	0.290972
1395286_at	0.0487	0.013	-3.27282	-3.81887	-1.78018	Fam43b	family with sequence similarity 43, member B	0.291147
1367774_at	0.000301	1.2e-05	-10.5242	3.78696	-1.77951	Gsta1	glutathione S-transferase alpha 1	0.291282
1383552_at	7.31e-05	9.19e-07	-15.2269	6.51902	-1.77942			0.2913
1395148_at	0.0225	0.00497	-3.98067	-2.79039	-1.77892			0.291402
1373785_at	0.0263	0.00604	-3.83228	-3.00088	-1.77758	Pld4	phospholipase D family, member 4	0.291672
1393933_at	7.3e-05	9.09e-07	-15.2524	6.5313	-1.77734	Sorl1	sortilin related receptor 1	0.29172
1382898_at	0.0178	0.00369	-4.21022	-2.47069	-1.77734			0.291721
1377485_at	0.000208	6.26e-06	-11.5705	4.48963	-1.77609	Gjc2	gap junction protein, gamma 2	0.291975
1377403_at	0.00129	0.000112	-7.53508	1.34905	-1.77559	LOC102547199	uncharacterized LOC102547199	0.292075
1373240_at	0.00524	0.000769	-5.54613	-0.76007	-1.77543	Dhrs3	dehydrogenase/reductase 3	0.292106
1380865_at	0.111	0.0369	-2.55243	-4.90942	-1.77222			0.292758
1383499_at	0.000223	7.19e-06	-11.3401	4.34043	-1.77139	Amigo1	adhesion molecule with Ig like domain 1	0.292926
1383654_a_at	0.000682	4.33e-05	-8.70589	2.39168	-1.77048	Fn3k	fructosamine 3 kinase	0.293112
1385365_at	0.000123	2.56e-06	-13.1614	5.44486	-1.77046	Extl1	exostosin-like glycosyltransferase 1	0.293116
1395464_at	0.00374	0.00049	-5.97174	-0.26768	-1.77027	Kctd17	potassium channel tetramerization domain containing 17	0.293153
1383995_at	0.0264	0.00606	-3.82933	-3.00509	-1.76932			0.293346
1369694_at	0.00105	8.3e-05	-7.89225	1.68085	-1.76856	Slc1a2	solute carrier family 1 (glial high affinity glutamate transporter), member 2	0.293502
1372296_at	0.00846	0.00145	-4.98188	-1.45132	-1.76776	Sh3bgr	SH3 domain binding glutamate-rich protein	0.293664
1376213_at	0.0193	0.00409	-4.13107	-2.58009	-1.76692	Rundc3b	RUN domain containing 3B	0.293836
1382479_at	0.000915	6.71e-05	-8.15025	1.9128	-1.76684	Lrrc4c	leucine rich repeat containing 4C	0.293851
1381001_at	0.00626	0.00097	-5.33359	-1.01519	-1.76626			0.29397
1379970_at	0.000178	4.75e-06	-12.0401	4.7848	-1.7656	Epha4	Eph receptor A4	0.294104
1370824_at	8.69e-05	1.31e-06	-14.4746	6.14702	-1.76414	Slc38a3	solute carrier family 38, member 3	0.294402
1398229_at	0.00427	0.000585	-5.80142	-0.46182	-1.76344			0.294545
1379708_at	0.0639	0.0183	-3.03305	-4.17903	-1.76317			0.294601
1393576_at	0.00203	0.000214	-6.81886	0.64352	-1.76202			0.294835
1373666_at	1.17e-05	9.82e-09	-28.7823	10.8961	-1.76158	Rapgef5	Rap guanine nucleotide exchange factor 5	0.294924
1371472_at	0.000103	1.84e-06	-13.7933	5.79158	-1.76043			0.295161
1388037_at	0.000895	6.47e-05	-8.19666	1.95386	-1.75622	Atp2b3	ATPase plasma membrane Ca2+ transporting 3	0.296023
1378083_at	0.000152	3.63e-06	-12.5165	5.07267	-1.75532			0.296208
1381465_at	0.0199	0.00424	-4.10186	-2.62069	-1.75529	Tmem229a	transmembrane protein 229A	0.296213
1369210_at	0.000841	5.87e-05	-8.31638	2.05887	-1.75314	Scn1a	sodium voltage-gated channel alpha subunit 1	0.296655
1384542_at	0.0683	0.0199	-2.97301	-4.26986	-1.75269	Znrf3	zinc and ring finger 3	0.296749
1387091_at	5.88e-05	6.01e-07	-16.1721	6.95872	-1.75188	Padi2	peptidyl arginine deiminase 2	0.296914
1382313_at	0.0116	0.00215	-4.6461	-1.88428	-1.75129			0.297036
1369504_at	0.0756	0.0226	-2.88519	-4.40305	-1.75039	Tgfbr1	transforming growth factor, beta receptor 1	0.297221
1370680_at	0.00842	0.00144	-4.98682	-1.44507	-1.74866	Stau2	staufen double-stranded RNA binding protein 2	0.297578
1380964_at	0.00139	0.000127	-7.39517	1.21556	-1.74672	Dtna	dystrobrevin, alpha	0.297978
1371840_at	9.89e-05	1.71e-06	-13.9348	5.8669	-1.74671	S1pr1	sphingosine-1-phosphate receptor 1	0.29798
1369972_at	0.000202	5.97e-06	-11.6491	4.53984	-1.74664	Fbxo21	F-box protein 21	0.297996
1381075_at	0.00179	0.000178	-7.01609	0.84341	-1.7455			0.29823
1379863_at	0.000669	4.2e-05	-8.74772	2.42665	-1.74365	Kcnd2	potassium voltage-gated channel subfamily D member 2	0.298614
1393449_at	0.0179	0.00371	-4.20597	-2.47655	-1.74184	Jam2	junctional adhesion molecule 2	0.298988
1372646_at	0.000208	6.24e-06	-11.5741	4.49194	-1.74156	RGD1305645	similar to RIKEN cDNA 1500015O10	0.299046
1374591_at	0.00101	7.84e-05	-7.96126	1.74351	-1.73935	Ptprd	protein tyrosine phosphatase, receptor type, D	0.299505
1379324_at	0.000162	4.05e-06	-12.3221	4.95656	-1.73857			0.299667
1384250_a_at	0.0347	0.00854	-3.57536	-3.37204	-1.73808			0.299769
1395334_at	0.000244	8.37e-06	-11.0913	4.17589	-1.73656	Fam69b	family with sequence similarity 69, member B	0.300084
1383174_at	0.00424	0.000578	-5.81283	-0.44869	-1.73557			0.300291
1379286_at	0.0002	5.86e-06	-11.6794	4.55916	-1.73534	Rnf152	ring finger protein 152	0.300338
1387313_at	9e-05	1.41e-06	-14.3318	6.07403	-1.73512	Myoc	myocilin	0.300383
1374622_at	0.00018	4.88e-06	-11.9937	4.75618	-1.73512	Amot	angiomotin	0.300385
1378472_at	0.00715	0.00115	-5.17826	-1.20563	-1.73454			0.300505
1380938_at	0.00134	0.00012	-7.46145	1.27906	-1.73426	Dstyk	dual serine/threonine and tyrosine protein kinase	0.300562
1397871_at	0.0027	0.000316	-6.40915	0.2138	-1.7331			0.300805
1367851_at	0.00402	0.00054	-5.87801	-0.37404	-1.73304	Ptgds	prostaglandin D2 synthase	0.300818
1391269_at	0.0241	0.00543	-3.9124	-2.88687	-1.73034	Pim2	Pim-2 proto-oncogene, serine/threonine kinase	0.301382
1385170_at	0.00106	8.32e-05	-7.88852	1.67745	-1.72931	Fstl5	follistatin-like 5	0.301596
1385505_at	0.00014	3.16e-06	-12.7668	5.21944	-1.72792			0.301888
1383012_at	0.00849	0.00145	-4.97751	-1.45685	-1.72775	Rhpn2	rhophilin, Rho GTPase binding protein 2	0.301923
1383895_at	0.000362	1.62e-05	-10.0716	3.46193	-1.72769	Dynlrb2	dynein light chain roadblock-type 2	0.301935
1368740_at	0.0401	0.0102	-3.4464	-3.56132	-1.72679	P2rx6	purinergic receptor P2X 6	0.302124
1375247_at	0.00149	0.000139	-7.29499	1.11872	-1.7265	Mgll	monoglyceride lipase	0.302185
1380828_at	0.00303	0.000371	-6.24816	0.03939	-1.72637	Gabra1	gamma-aminobutyric acid type A receptor alpha1 subunit	0.302212
1379140_at	0.000253	9.02e-06	-10.973	4.09634	-1.72454	LOC100362814	hypothetical protein LOC100362814	0.302596
1392994_at	0.00363	0.000472	-6.00961	-0.22503	-1.72433	Nmrk1	nicotinamide riboside kinase 1	0.302639
1370103_at	0.0018	0.00018	-7.00191	0.82918	-1.72295	Hcn1	hyperpolarization-activated cyclic nucleotide-gated potassium channel 1	0.302929
1388988_at	0.000331	1.4e-05	-10.2917	3.62168	-1.7225	Abhd14b	abhydrolase domain containing 14b	0.303023
1379860_at	0.0261	0.00595	-3.84341	-2.98499	-1.72242			0.303039
1368814_at	0.00687	0.0011	-5.22243	-1.15112	-1.72235	Aldh6a1	aldehyde dehydrogenase 6 family, member A1	0.303054
1393945_at	3.26e-05	1.26e-07	-20.1583	8.5336	-1.72152			0.303229
1374954_at	0.000458	2.38e-05	-9.51803	3.04513	-1.72144	Hdac11	histone deacetylase 11	0.303246
1378809_at	0.075	0.0224	-2.89109	-4.39409	-1.72138			0.303258
1368215_at	0.000179	4.79e-06	-12.0254	4.77575	-1.7193	Tpp1	tripeptidyl peptidase 1	0.303696
1376463_at	6.84e-05	7.99e-07	-15.5325	6.66441	-1.71749			0.304077
1392210_at	0.0136	0.00262	-4.48313	-2.10032	-1.71626	RGD1307443	similar to mKIAA0319 protein	0.304337
1392865_at	0.000413	1.99e-05	-9.76996	3.23753	-1.71607	Fgf9	fibroblast growth factor 9	0.304376
1386149_at	6.47e-05	7.18e-07	-15.7708	6.77561	-1.71388			0.304839
1394290_at	0.000215	6.68e-06	-11.461	4.41909	-1.71229			0.305175
1392189_at	0.0192	0.00406	-4.13591	-2.57338	-1.70996	Rfx4	regulatory factor X4	0.305669
1384814_at	0.00611	0.000941	-5.36138	-0.98147	-1.70952			0.305761
1387854_at	0.0636	0.0181	-3.03804	-4.17148	-1.70747	Col1a2	collagen type I alpha 2 chain	0.306197
1397853_s_at	0.00506	0.000734	-5.58937	-0.70893	-1.70513	LOC100912165///Arhgef9	rho guanine nucleotide exchange factor 9-like///Cdc42 guanine nucleotide exchange factor 9	0.306694
1390856_at	0.000366	1.65e-05	-10.0434	3.44118	-1.7046	Rfx3	regulatory factor X3	0.306807
1368474_at	0.000341	1.47e-05	-10.2144	3.56595	-1.70438	LOC100912479///Vcam1	vascular cell adhesion protein 1-like///vascular cell adhesion molecule 1	0.306854
1393283_at	0.00325	0.000405	-6.15958	-0.05796	-1.70208	Ankrd34b	ankyrin repeat domain 34B	0.307343
1385901_at	0.0453	0.0119	-3.33599	-3.7248	-1.7016	Ptdss2	phosphatidylserine synthase 2	0.307445
1376881_at	0.0038	0.000501	-5.9502	-0.29202	-1.7005			0.307679
1394625_at	0.00216	0.000232	-6.73185	0.55391	-1.69889	Tmem144	transmembrane protein 144	0.308023
1387639_at	0.00296	0.00036	-6.27805	0.07201	-1.69859	Hpcal4	hippocalcin-like 4	0.308086
1394022_at	0.000239	8.07e-06	-11.151	4.2157	-1.69831	Id4	inhibitor of DNA binding 4, HLH protein	0.308148
1395467_at	0.00246	0.000276	-6.54735	0.36097	-1.69766	Cpne6	copine 6	0.308286
1382527_at	0.0558	0.0154	-3.15307	-3.99818	-1.69715	Plcxd2	phosphatidylinositol-specific phospholipase C, X domain containing 2	0.308395
1372884_at	0.00354	0.000455	-6.04429	-0.18613	-1.69705	Large1	LARGE xylosyl- and glucuronyltransferase 1	0.308417
1385124_at	0.00182	0.000182	-6.99046	0.81768	-1.69574	Trib2	tribbles pseudokinase 2	0.308696
1391249_at	0.000679	4.29e-05	-8.71797	2.4018	-1.69561	RGD1312005	similar to DD1	0.308724
1388968_at	0.00109	8.77e-05	-7.82551	1.61981	-1.69546	Mpped1	metallophosphoesterase domain containing 1	0.308757
1394786_at	0.000253	9e-06	-10.9752	4.09787	-1.69303	Sorl1	sortilin related receptor 1	0.309276
1391885_at	6.35e-05	6.95e-07	-15.8436	6.80924	-1.69228			0.309436
1368287_at	0.000754	5.02e-05	-8.51507	2.2303	-1.69092	Chn1	chimerin 1	0.30973
1370970_at	0.00184	0.000185	-6.97433	0.80145	-1.69001	Kcnj14	potassium voltage-gated channel subfamily J member 14	0.309924
1389353_at	5.28e-05	4.8e-07	-16.6946	7.18954	-1.68994	Sema6d	semaphorin 6D	0.30994
1381369_at	0.00112	9.06e-05	-7.78662	1.58404	-1.68694	Lgi3	leucine-rich repeat LGI family, member 3	0.310585
1379673_at	0.0217	0.00474	-4.01627	-2.74033	-1.6866	Uap1l1	UDP-N-acetylglucosamine pyrophosphorylase 1 like 1	0.310658
1385138_at	0.000872	6.22e-05	-8.24446	1.99594	-1.68656	Tbc1d4	TBC1 domain family, member 4	0.310666
1384655_at	0.00199	0.000207	-6.85411	0.67956	-1.68646	Kirrel3	kin of IRRE like 3 (Drosophila)	0.310688
1395236_at	0.00132	0.000117	-7.48488	1.30139	-1.68628	Ppp1r3c	protein phosphatase 1, regulatory subunit 3C	0.310727
1373537_at	7.3e-05	9.03e-07	-15.2648	6.53724	-1.68593			0.310802
1388557_at	0.0559	0.0154	-3.1518	-4.00009	-1.68417	Tubb4b///C7	tubulin, beta 4B class IVb///complement component 7	0.311182
1390731_at	0.00226	0.000246	-6.67084	0.49056	-1.68391	Rasgef1b	RasGEF domain family, member 1B	0.311238
1373204_at	0.00297	0.000361	-6.2741	0.06771	-1.68376	Tmem176a	transmembrane protein 176A	0.31127
1389618_at	0.00045	2.3e-05	-9.56453	3.08099	-1.68353			0.31132
1387364_at	0.0145	0.00285	-4.41661	-2.18961	-1.68165	Folh1	folate hydrolase 1	0.311726
1388133_at	0.000973	7.39e-05	-8.03262	1.80783	-1.68112	Csdc2	cold shock domain containing C2	0.311841
1382818_at	0.000217	6.77e-06	-11.4384	4.40443	-1.6802	Fam126b	family with sequence similarity 126, member B	0.31204
1381615_at	0.000566	3.29e-05	-9.0709	2.69188	-1.67705			0.312721
1379936_at	0.00171	0.000168	-7.08006	0.90731	-1.67418			0.313344
1395836_at	0.000264	9.7e-06	-10.8563	4.01714	-1.67417			0.313346
1378396_at	8.29e-05	1.18e-06	-14.689	6.25511	-1.67338			0.313519
1386648_at	0.000396	1.85e-05	-9.87779	3.31847	-1.67207	Dnajc6	DnaJ heat shock protein family (Hsp40) member C6	0.313802
1378105_at	0.0123	0.00233	-4.58055	-1.97071	-1.67134			0.313962
1384392_at	0.0259	0.00592	-3.84745	-2.97923	-1.66893	Cyp26b1	cytochrome P450, family 26, subfamily b, polypeptide 1	0.314487
1387131_at	0.0332	0.00806	-3.61729	-3.31092	-1.66473	Serpini1	serpin family I member 1	0.315403
1377791_at	2.98e-05	1.09e-07	-20.559	8.67098	-1.6647	RragB	Ras-related GTP binding B	0.31541
1381922_at	0.000314	1.3e-05	-10.4068	3.70395	-1.66419	Slc5a11	solute carrier family 5 member 11	0.315521
1376989_at	0.00198	0.000204	-6.86647	0.69216	-1.66311			0.315757
1391534_at	0.000412	1.99e-05	-9.77441	3.24089	-1.66236	Elovl2	ELOVL fatty acid elongase 2	0.315921
1369704_at	0.0821	0.0252	-2.81126	-4.5154	-1.66165	Slc6a20	solute carrier family 6 member 20	0.316077
1370555_at	0.000963	7.25e-05	-8.05518	1.82806	-1.65893	Nalcn	sodium leak channel, non-selective	0.316673
1382905_at	0.00241	0.000269	-6.57416	0.38926	-1.65861			0.316744
1385016_at	0.00456	0.000641	-5.71569	-0.56099	-1.65855	RGD1560784	similar to RIKEN cDNA B630019K06	0.316758
1369133_a_at	0.0116	0.00216	-4.64364	-1.88752	-1.65847	Kcnc3	potassium voltage-gated channel subfamily C member 3	0.316775
1389120_at	0.0864	0.0269	-2.76784	-4.58147	-1.65722	Kcnc3	potassium voltage-gated channel subfamily C member 3	0.31705
1377336_at	0.00061	3.69e-05	-8.91645	2.56619	-1.65717	Sema3b	semaphorin 3B	0.317061
1393661_at	3.74e-05	1.81e-07	-19.152	8.17333	-1.65678			0.317146
1374874_at	0.00131	0.000115	-7.50884	1.32418	-1.65631	Cc2d2a	coiled-coil and C2 domain containing 2A	0.317249
1368704_a_at	0.00871	0.0015	-4.95052	-1.49105	-1.6552	Cspg5	chondroitin sulfate proteoglycan 5	0.317493
1388299_at	0.052	0.0141	-3.21549	-3.90456	-1.6551	Dnal1	dynein, axonemal, light chain 1	0.317516
1373787_at	0.000161	4e-06	-12.341	4.96793	-1.65508	Slc6a9	solute carrier family 6 member 9	0.317519
1393359_at	0.0165	0.00335	-4.28777	-2.36436	-1.65484	Ap3b2	adaptor-related protein complex 3, beta 2 subunit	0.317573
1370964_at	0.0231	0.00515	-3.95353	-2.82866	-1.65406	Ass1	argininosuccinate synthase 1	0.317745
1393141_at	0.0363	0.00903	-3.53418	-3.43227	-1.65344			0.317882
1376892_at	0.000218	6.87e-06	-11.4159	4.38983	-1.65295	Gria3	glutamate ionotropic receptor AMPA type subunit 3	0.317989
1376785_at	0.00052	2.89e-05	-9.24906	2.83449	-1.65069	Chpt1	choline phosphotransferase 1	0.318487
1387232_at	0.00252	0.000286	-6.51111	0.3226	-1.64951	Bmp4	bone morphogenetic protein 4	0.318747
1374959_at	0.232	0.101	-1.87559	-5.91733	-1.64915	Nqo2	NAD(P)H quinone dehydrogenase 2	0.318829
1379566_at	0.0099	0.00175	-4.81674	-1.66221	-1.64872	Rbm11	RNA binding motif protein 11	0.318923
1376980_at	0.00865	0.00149	-4.95773	-1.48192	-1.64835	Htr2c	5-hydroxytryptamine receptor 2C	0.319006
1369054_at	0.000729	4.77e-05	-8.58055	2.28603	-1.64809	Rph3a	rabphilin 3A	0.319062
1369953_a_at	0.00277	0.000328	-6.37228	0.17414	-1.64767	Cd24	CD24 molecule	0.319156
1387235_at	0.000857	6.04e-05	-8.281	2.02797	-1.64675	Chga	chromogranin A	0.319359
1378365_at	0.00726	0.00118	-5.1581	-1.2306	-1.64668			0.319374
1380308_at	0.105	0.0345	-2.59898	-4.83859	-1.64466	LOC100909866	uncharacterized LOC100909866	0.319822
1391246_at	0.00482	0.000686	-5.65184	-0.6355	-1.64325			0.320135
1385954_at	0.00243	0.000272	-6.56356	0.37809	-1.64269	LOC100125362	hypothetical protein LOC100125362	0.320259
1387283_at	0.0274	0.00634	-3.79505	-3.05415	-1.64162	Mx2	myxovirus (influenza virus) resistance 2	0.320497
1372332_at	0.00533	0.000784	-5.52735	-0.78236	-1.64151	Mef2c	myocyte enhancer factor 2C	0.32052
1379092_at	0.00725	0.00118	-5.16096	-1.22706	-1.64118	Kcna2	potassium voltage-gated channel subfamily A member 2	0.320594
1395372_at	0.00367	0.00048	-5.99301	-0.2437	-1.64109			0.320615
1383826_at	0.001	7.72e-05	-7.97877	1.75934	-1.64002	Rab40b	Rab40b, member RAS oncogene family	0.320852
1389411_at	0.000162	4.06e-06	-12.316	4.9529	-1.63968	Frmd5	FERM domain containing 5	0.320927
1373436_at	0.00675	0.00107	-5.24386	-1.12478	-1.63921	RGD1306739	similar to RIKEN cDNA 1700040L02	0.321033
1397632_at	0.000102	1.81e-06	-13.825	5.80853	-1.63715	Slitrk1	SLIT and NTRK-like family, member 1	0.321492
1398521_at	0.00698	0.00112	-5.2047	-1.17296	-1.63666			0.3216
1372158_at	0.0025	0.000283	-6.52289	0.3351	-1.63447	Macrod1	MACRO domain containing 1	0.322088
1389256_at	5.4e-05	5.02e-07	-16.5896	7.14382	-1.63169			0.322709
1383649_a_at	0.00624	0.000966	-5.33727	-1.01071	-1.63056	Ints6l	integrator complex subunit 6 like	0.322964
1383331_at	0.0264	0.00605	-3.83046	-3.00348	-1.63024			0.323034
1371671_at	0.000794	5.42e-05	-8.41793	2.14693	-1.62995			0.323099
1370116_at	0.00383	0.000506	-5.94089	-0.30257	-1.62707	2018-09-03	septin 3	0.323744
1391117_at	0.00407	0.000548	-5.8643	-0.3897	-1.62527	Pnmal2	paraneoplastic Ma antigen family-like 2	0.32415
1391285_at	0.0553	0.0152	-3.16158	-3.98539	-1.62511	Zfyve9	zinc finger FYVE-type containing 9	0.324185
1370329_at	0.00103	7.98e-05	-7.94001	1.72427	-1.6246	Cyp2d4	cytochrome P450, family 2, subfamily d, polypeptide 4	0.3243
1369860_a_at	0.0735	0.0218	-2.90969	-4.36585	-1.62454	Htr2c	5-hydroxytryptamine receptor 2C	0.324313
1390399_at	0.0049	0.000703	-5.62925	-0.66199	-1.62358	Crebl2	cAMP responsive element binding protein-like 2	0.324529
1397917_at	0.0018	0.00018	-7.00486	0.83215	-1.62224	Ctso	cathepsin O	0.324831
1384571_at	5.51e-05	5.26e-07	-16.4788	7.09522	-1.62168	Zswim5	zinc finger, SWIM-type containing 5	0.324957
1376092_at	0.000316	1.31e-05	-10.391	3.69274	-1.62167	LOC100911992	uncharacterized LOC100911992	0.32496
1370583_s_at	0.0225	0.00496	-3.98145	-2.78929	-1.62144	Abcb1a///Abcb1b	ATP binding cassette subfamily B member 1A///ATP-binding cassette, subfamily B (MDR/TAP), member 1B	0.32501
1395373_at	0.000512	2.83e-05	-9.27458	2.85471	-1.62143			0.325012
1382054_at	0.00132	0.000117	-7.48482	1.30134	-1.62121			0.325063
1391546_at	0.00215	0.00023	-6.73934	0.56166	-1.62094			0.325123
1369097_s_at	0.0053	0.000779	-5.53322	-0.77538	-1.61894	Gucy1b3	guanylate cyclase 1 soluble subunit beta 3	0.325574
1389464_at	0.000146	3.42e-06	-12.6246	5.13638	-1.61742	Lnx1	ligand of numb-protein X 1	0.325918
1376280_at	0.0226	0.005	-3.97577	-2.79729	-1.61693	Wnk2	WNK lysine deficient protein kinase 2	0.326029
1374667_at	0.00333	0.000418	-6.12854	-0.09229	-1.61612	Fhod3	formin homology 2 domain containing 3	0.326211
1368751_at	0.0198	0.00422	-4.10614	-2.61474	-1.61509	Kcns3	potassium voltage-gated channel, modifier subfamily S, member 3	0.326445
1386969_at	0.00212	0.000226	-6.76081	0.58382	-1.61418	Nrn1	neuritin 1	0.32665
1389649_at	0.000355	1.56e-05	-10.1237	3.50003	-1.61412	Acss3	acyl-CoA synthetase short-chain family member 3	0.326664
1376198_at	0.031	0.00739	-3.68182	-3.21726	-1.61376	Clmp	CXADR-like membrane protein	0.326746
1374280_at	0.0262	0.00599	-3.83881	-2.99156	-1.61131	Cbln2	cerebellin 2 precursor	0.327302
1372248_at	0.00438	0.000607	-5.76772	-0.50069	-1.61089	Sesn1	sestrin 1	0.327397
1370503_s_at	0.033	0.008	-3.62266	-3.3031	-1.61033	Epb41l3	erythrocyte membrane protein band 4.1-like 3	0.327523
1370375_at	0.0276	0.00641	-3.78744	-3.06506	-1.60971	Gls2	glutaminase 2	0.327664
1369056_at	0.00195	0.0002	-6.88804	0.71413	-1.60959	Rpe65	RPE65, retinoid isomerohydrolase	0.327692
1385747_at	0.0014	0.000128	-7.38066	1.2016	-1.60906			0.327813
1373282_at	0.000433	2.16e-05	-9.65729	3.15206	-1.6087	Slc25a33	solute carrier family 25 member 33	0.327894
1380082_at	0.00124	0.000107	-7.59172	1.40253	-1.60658			0.328376
1384183_at	0.000223	7.2e-06	-11.3376	4.3388	-1.60623	Myrip	myosin VIIA and Rab interacting protein	0.328455
1389637_at	0.00237	0.000262	-6.60469	0.42137	-1.60509			0.328714
1384824_at	2.05e-05	4.81e-08	-23.0625	9.45905	-1.60446	Pcdh18	protocadherin 18	0.328858
1380466_at	0.00117	9.71e-05	-7.70542	1.50888	-1.60436			0.328882
1379580_at	0.000979	7.48e-05	-8.01762	1.79435	-1.60387	Chd6	chromodomain helicase DNA binding protein 6	0.328994
1387286_at	0.000122	2.49e-06	-13.2081	5.47107	-1.60317	Grm1	glutamate receptor, metabotropic 1	0.329152
1383327_at	7.82e-05	1.03e-06	-14.981	6.39966	-1.60199	Pdcd4	programmed cell death 4	0.329422
1390393_at	0.0403	0.0102	-3.44383	-3.56511	-1.60178	Cntnap2	contactin associated protein-like 2	0.329471
1379437_at	0.013	0.00247	-4.53237	-2.03464	-1.60101			0.329647
1379920_at	0.00904	0.00157	-4.90954	-1.54321	-1.60028			0.329813
1391802_at	0.00337	0.000425	-6.11188	-0.11078	-1.59905			0.330094
1368572_a_at	0.0275	0.00638	-3.79133	-3.05948	-1.59793	Grin1	glutamate ionotropic receptor NMDA type subunit 1	0.33035
1377686_at	0.0207	0.00446	-4.06376	-2.67382	-1.59747			0.330456
1391852_at	0.011	0.00201	-4.7027	-1.81016	-1.59488			0.331049
1391007_s_at	0.000487	2.62e-05	-9.38087	2.9384	-1.59436	Kcnj11	potassium voltage-gated channel subfamily J member 11	0.331168
1370214_at	0.00725	0.00118	-5.16193	-1.22584	-1.59357	Pvalb	parvalbumin	0.331351
1381194_at	0.000362	1.61e-05	-10.0775	3.46627	-1.59243			0.331613
1394578_at	0.0383	0.00963	-3.48728	-3.50112	-1.59172			0.331775
1391013_at	0.00901	0.00157	-4.91373	-1.53786	-1.59111			0.331917
1389084_at	0.0597	0.0168	-3.09212	-4.0899	-1.59058	LOC100912167	uncharacterized LOC100912167	0.332038
1398405_at	0.00391	0.000521	-5.91373	-0.33338	-1.58916	2018-09-06	septin 6	0.332366
1375765_at	0.00133	0.000118	-7.47787	1.29471	-1.58841	Hpcal4	hippocalcin-like 4	0.332537
1370146_at	0.00139	0.000126	-7.40237	1.22248	-1.58748	Glrb	glycine receptor, beta	0.332752
1377788_at	0.00562	0.000846	-5.45777	-0.86536	-1.58679	Cap2	CAP, adenylate cyclase-associated protein, 2 (yeast)	0.332911
1383084_at	0.000459	2.39e-05	-9.51298	3.04122	-1.58609	Ttll7	tubulin tyrosine ligase like 7	0.333074
1377456_at	0.026	0.00594	-3.84479	-2.98302	-1.58558			0.333192
1383795_at	0.00141	0.000129	-7.37379	1.19498	-1.58428			0.333492
1376633_at	0.000253	9.08e-06	-10.9624	4.08917	-1.58332	RGD1566029	similar to mKIAA1644 protein	0.333714
1397414_at	0.0125	0.00235	-4.57194	-1.98212	-1.58245			0.333915
1368972_at	0.00029	1.13e-05	-10.6173	3.85222	-1.58198	Ntrk2	neurotrophic receptor tyrosine kinase 2	0.334024
1368587_at	0.23	0.1	-1.88286	-5.90691	-1.58035	LOC100911905///Apoc1	apolipoprotein C-I-like///apolipoprotein C1	0.3344
1393044_at	0.000684	4.35e-05	-8.7009	2.38751	-1.57951	Cmpk2	cytidine/uridine monophosphate kinase 2	0.334596
1380681_at	0.00151	0.000142	-7.26975	1.09415	-1.57946	Rnf180	ring finger protein 180	0.334607
1383699_at	0.00407	0.000549	-5.86336	-0.39078	-1.5791	Rit2	Ras-like without CAAX 2	0.33469
1379770_at	0.000914	6.7e-05	-8.15228	1.9146	-1.57896	Chpt1	choline phosphotransferase 1	0.334723
1398215_at	0.0293	0.00688	-3.73465	-3.14095	-1.57704			0.33517
1380280_at	0.0214	0.00466	-4.0292	-2.7222	-1.57688			0.335206
1373322_at	0.00539	0.000796	-5.5135	-0.79883	-1.57573			0.335473
1373581_at	0.00773	0.00129	-5.08425	-1.32256	-1.5755	Arhgap44	Rho GTPase activating protein 44	0.335526
1377885_at	0.000249	8.7e-06	-11.0307	4.13526	-1.5752			0.335596
1376302_at	0.0011	8.83e-05	-7.81807	1.61298	-1.5746			0.335736
1369256_at	0.00116	9.6e-05	-7.71891	1.52141	-1.57336	Bace1	beta-secretase 1	0.336025
1387078_at	0.00623	0.000965	-5.33847	-1.00926	-1.57162	Inpp4a	inositol polyphosphate-4-phosphatase type I A	0.336429
1370544_at	0.192	0.076	-2.06939	-5.63564	-1.57033	Eml2	echinoderm microtubule associated protein like 2	0.336732
1379776_at	0.0204	0.00437	-4.07903	-2.6525	-1.56943	Erich3	glutamate-rich 3	0.336941
1391097_at	8.38e-05	1.22e-06	-14.6232	6.22212	-1.56729			0.337441
1374596_at	0.000131	2.8e-06	-12.989	5.34723	-1.56715	RGD1309594	similar to RIKEN cDNA 1810043G02; DNA segment, Chr 10, Johns Hopkins University 13, expressed	0.337474
1368563_at	0.00201	0.000211	-6.83177	0.65673	-1.56619	Aspa	aspartoacylase	0.337698
1393302_at	0.0492	0.0131	-3.26415	-3.8318	-1.56556			0.337846
1385008_at	8.93e-05	1.37e-06	-14.3801	6.09878	-1.56478			0.338029
1394463_at	0.018	0.00374	-4.20029	-2.48437	-1.56429			0.338144
1374241_at	0.000502	2.73e-05	-9.32416	2.89385	-1.56419			0.338167
1385584_at	0.00117	9.72e-05	-7.70446	1.50798	-1.56398			0.338218
1385552_at	0.0136	0.00264	-4.47898	-2.10588	-1.56358			0.338311
1369777_a_at	0.00101	7.81e-05	-7.96524	1.74711	-1.56356	Shank2	SH3 and multiple ankyrin repeat domains 2	0.338315
1388525_at	0.000288	1.11e-05	-10.649	3.87425	-1.5618	Pik3ip1	phosphoinositide-3-kinase interacting protein 1	0.338727
1369827_at	0.00592	0.000903	-5.39855	-0.93654	-1.56166	Clstn3	calsyntenin 3	0.338762
1375890_at	0.000836	5.82e-05	-8.32842	2.06936	-1.56139	Dact3	dishevelled-binding antagonist of beta-catenin 3	0.338825
1381185_at	0.000621	3.79e-05	-8.88208	2.53796	-1.56108	Nfatc2	nuclear factor of activated T-cells 2	0.338897
1380833_at	0.000186	5.14e-06	-11.9047	4.70093	-1.56028	Gpld1	glycosylphosphatidylinositol specific phospholipase D1	0.339085
1388164_at	0.115	0.0384	-2.52607	-4.94952	-1.55899	RT1-S3	RT1 class Ib, locus S3	0.339388
1388948_at	0.00229	0.000251	-6.64947	0.46827	-1.55851	Stard10	StAR-related lipid transfer domain containing 10	0.339501
1392501_at	0.000572	3.34e-05	-9.05234	2.67687	-1.55701			0.339854
1374649_at	0.00671	0.00107	-5.24979	-1.11751	-1.55566	Rasgrp2	RAS guanyl releasing protein 2	0.340173
1387023_at	0.000532	3e-05	-9.19409	2.79075	-1.55537	Gstm7	glutathione S-transferase, mu 7	0.340242
1379516_at	0.000538	3.05e-05	-9.17222	2.77329	-1.55451	RGD1559896	similar to RIKEN cDNA 2310022B05	0.340444
1383459_at	0.00181	0.000182	-6.99486	0.8221	-1.554	Lgi3	leucine-rich repeat LGI family, member 3	0.340565
1392140_at	0.0128	0.00244	-4.54382	-2.01942	-1.55381			0.340608
1393274_at	0.00158	0.000151	-7.19933	1.02524	-1.55372	Ndufaf7	NADH:ubiquinone oxidoreductase complex assembly factor 7	0.34063
1374868_at	0.00181	0.000181	-6.99689	0.82414	-1.55363	Zfhx3	zinc finger homeobox 3	0.340651
1397523_at	0.00603	0.000926	-5.3759	-0.96389	-1.55302	Lrp11	LDL receptor related protein 11	0.340796
1368016_at	0.00185	0.000187	-6.96169	0.78871	-1.55187	Pecr	peroxisomal trans-2-enoyl-CoA reductase	0.341068
1392769_at	0.000131	2.81e-06	-12.9856	5.34528	-1.55176	Arxes2	adipocyte-related X-chromosome expressed sequence 2	0.341095
1376218_a_at	0.00998	0.00177	-4.80835	-1.67303	-1.55174	LOC685152	ATPase, class I, type 8B, member 2	0.341098
1368615_a_at	0.00256	0.000293	-6.48676	0.29673	-1.55141	Slc18a3	solute carrier family 18 member A3	0.341175
1385229_at	0.19	0.0749	-2.07886	-5.62168	-1.55123	Pcdh20	protocadherin 20	0.34122
1383326_a_at	0.00275	0.000324	-6.38272	0.18539	-1.5495	Pdcd4	programmed cell death 4	0.341629
1398272_at	0.018	0.00374	-4.19981	-2.48503	-1.54918	B4galnt1	beta-1,4-N-acetyl-galactosaminyl transferase 1	0.341703
1370881_at	7.26e-05	8.96e-07	-15.2821	6.54553	-1.54909	Tst	thiosulfate sulfurtransferase	0.341725
1377993_at	0.0519	0.014	-3.2174	-3.9017	-1.5483	Gng13	G protein subunit gamma 13	0.341912
1391559_at	0.00148	0.000137	-7.30395	1.12742	-1.54818	Tlcd1	TLC domain containing 1	0.341941
1391911_at	0.00296	0.00036	-6.27776	0.0717	-1.54805	LOC102553820	uncharacterized LOC102553820	0.341972
1373179_at	0.000525	2.94e-05	-9.22184	2.81286	-1.54766	Btbd8	BTB (POZ) domain containing 8	0.342065
1382908_at	1.53e-05	2.4e-08	-25.4088	10.1023	-1.54752	Epha4	Eph receptor A4	0.342097
1393253_at	0.0172	0.00354	-4.24393	-2.42436	-1.54327	Zfp365	zinc finger protein 365	0.343108
1368863_at	0.000237	7.97e-06	-11.1709	4.22888	-1.54295	Nme3	NME/NM23 nucleoside diphosphate kinase 3	0.343184
1373915_at	0.000885	6.36e-05	-8.21642	1.97129	-1.5424	Dmpk	dystrophia myotonica-protein kinase	0.343314
1389020_at	0.2	0.0807	-2.029	-5.69501	-1.54222	Islr	immunoglobulin superfamily containing leucine-rich repeat	0.343356
1389221_at	0.000969	7.33e-05	-8.04181	1.81608	-1.54176	Mmd2	monocyte to macrophage differentiation-associated 2	0.343466
1382226_at	0.0567	0.0157	-3.13863	-4.01989	-1.53975			0.343944
1383424_at	0.000313	1.29e-05	-10.4201	3.71338	-1.53917	Cmpk2	cytidine/uridine monophosphate kinase 2	0.344083
1398358_a_at	0.000256	9.31e-06	-10.9226	4.06224	-1.53817	Itgb5	integrin subunit beta 5	0.344322
1389054_at	0.0886	0.0277	-2.74565	-4.61525	-1.53814	LOC498368	similar to RIKEN cDNA 0610040J01	0.34433
1378356_at	9e-05	1.41e-06	-14.3274	6.07177	-1.53799	Slc24a4	solute carrier family 24 member 4	0.344364
1376341_at	0.00355	0.000457	-6.03974	-0.19123	-1.53796			0.344373
1389554_at	0.0348	0.00856	-3.57339	-3.37493	-1.5359	Nr2f2	nuclear receptor subfamily 2, group F, member 2	0.344865
1384203_at	0.00539	0.000797	-5.51322	-0.79916	-1.53586	Pde1b	phosphodiesterase 1B	0.344873
1368688_at	0.000341	1.47e-05	-10.2155	3.56677	-1.53509	Ntsr2	neurotensin receptor 2	0.345058
1397513_at	0.00455	0.000638	-5.71924	-0.55687	-1.53498	Ralyl	RALY RNA binding protein-like	0.345084
1378026_at	0.00118	9.91e-05	-7.68128	1.48641	-1.53447			0.345206
1376051_at	0.00719	0.00116	-5.17193	-1.21346	-1.53432	Cryl1	crystallin, lambda 1	0.345243
1389159_at	0.0128	0.00244	-4.54153	-2.02246	-1.53225			0.345737
1368295_at	0.000692	4.42e-05	-8.67968	2.36971	-1.53165	Slco2b1	solute carrier organic anion transporter family, member 2b1	0.345881
1391028_at	0.00164	0.000158	-7.15021	0.97686	-1.53143	Nrip2	nuclear receptor interacting protein 2	0.345935
1376000_at	0.055	0.0151	-3.16561	-3.97934	-1.53006			0.346262
1378547_at	0.0056	0.000842	-5.46198	-0.86033	-1.52866			0.346599
1388060_at	0.14	0.0498	-2.35207	-5.21329	-1.52853	Syt12	synaptotagmin 12	0.34663
1394952_at	0.265	0.135	-1.68062	-6.19073	-1.52802	Hapln2	hyaluronan and proteoglycan link protein 2	0.346752
1369960_at	0.000725	4.72e-05	-8.59504	2.29832	-1.52713	Fxyd1	FXYD domain-containing ion transport regulator 1	0.346967
1383638_at	4.83e-05	3.97e-07	-17.1514	7.38469	-1.52691			0.347021
1387208_at	0.00102	7.93e-05	-7.94612	1.7298	-1.52598	Ngb	neuroglobin	0.347244
1381595_at	0.00273	0.000322	-6.39024	0.19348	-1.52588			0.347268
1373699_at	0.0241	0.00542	-3.91328	-2.88562	-1.52487			0.34751
1373545_at	0.00112	9.11e-05	-7.78084	1.57871	-1.52346	Ttll7	tubulin tyrosine ligase like 7	0.347851
1385622_at	0.00864	0.00148	-4.95953	-1.47963	-1.52339	Col25a1	collagen, type XXV, alpha 1	0.347867
1383072_at	0.000797	5.45e-05	-8.41157	2.14143	-1.52219	Pygm	phosphorylase, glycogen, muscle	0.348158
1395519_at	0.00501	0.000723	-5.60237	-0.69361	-1.52174	Mturn	maturin, neural progenitor differentiation regulator homolog (Xenopus)	0.348266
1398411_at	0.000728	4.75e-05	-8.58559	2.29031	-1.52047			0.348573
1382651_at	0.00124	0.000106	-7.6054	1.41539	-1.52039			0.348592
1374187_at	0.00171	0.000167	-7.08432	0.91154	-1.52038	Adam22	ADAM metallopeptidase domain 22	0.348595
1385633_at	0.0163	0.0033	-4.29974	-2.34803	-1.52015			0.348651
1385734_at	0.000753	5.02e-05	-8.5168	2.23178	-1.51873			0.348994
1394399_at	0.00151	0.000141	-7.27324	1.09755	-1.51855			0.349036
1369417_a_at	5.26e-05	4.77e-07	-16.7107	7.19653	-1.51714	Opcml	opioid binding protein/cell adhesion molecule-like	0.349377
1391300_at	0.0228	0.00506	-3.96668	-2.81011	-1.51651	Mta3	metastasis associated 1 family, member 3	0.349529
1376619_at	0.000122	2.5e-06	-13.2009	5.46705	-1.51636	Ptprd	protein tyrosine phosphatase, receptor type, D	0.349567
1390867_at	0.0025	0.000283	-6.5232	0.33543	-1.51543	LOC100910054	NF-kappa-B-repressing factor-like	0.349792
1370132_at	0.0234	0.00522	-3.94193	-2.84505	-1.51446	Fkbp1b	FK506 binding protein 1B	0.350028
1372180_at	2.05e-05	4.6e-08	-23.2052	9.50065	-1.51418	Sdc3	syndecan 3	0.350095
1388423_at	0.00407	0.000549	-5.86212	-0.39219	-1.51323	RGD1302996	hypothetical protein MGC:15854	0.350325
1372725_at	0.0333	0.00811	-3.61297	-3.31721	-1.51268	Plscr2	phospholipid scramblase 2	0.35046
1368528_at	0.00107	8.46e-05	-7.86921	1.65983	-1.5126	Cd99l2	CD99 molecule-like 2	0.350478
1379379_at	0.031	0.0074	-3.68019	-3.21962	-1.51228			0.350558
1383612_at	0.000701	4.49e-05	-8.65804	2.35151	-1.51214			0.35059
1368200_at	0.00136	0.000122	-7.43567	1.25441	-1.51203	Cx3cl1	C-X3-C motif chemokine ligand 1	0.350616
1369924_at	0.00155	0.000147	-7.22914	1.05448	-1.51181	Sncb	synuclein, beta	0.35067
1387521_at	0.000175	4.63e-06	-12.0854	4.81268	-1.51104	Pdcd4	programmed cell death 4	0.350859
1368701_at	0.000816	5.61e-05	-8.37511	2.10991	-1.51018	Atp1a3	ATPase Na+/K+ transporting subunit alpha 3	0.351067
1369066_at	0.0065	0.00102	-5.28963	-1.06874	-1.5085	Madd	MAP-kinase activating death domain	0.351478
1390552_at	0.0138	0.00269	-4.46279	-2.12756	-1.50826	Magi1	membrane associated guanylate kinase, WW and PDZ domain containing 1	0.351534
1390291_at	0.0067	0.00106	-5.25208	-1.1147	-1.50614			0.352052
1385559_at	0.00032	1.34e-05	-10.3614	3.67164	-1.50563	RGD1563441	similar to RIKEN cDNA A030009H04	0.352175
1377966_at	0.000375	1.72e-05	-9.98826	3.40055	-1.50496	Paqr7	progestin and adipoQ receptor family member 7	0.35234
1393084_at	0.139	0.0491	-2.36046	-5.20061	-1.50493	Hrasls	HRAS-like suppressor	0.352347
1368156_at	0.00484	0.00069	-5.64669	-0.64153	-1.50373	Camkk1	calcium/calmodulin-dependent protein kinase kinase 1	0.35264
1383197_at	0.000921	6.78e-05	-8.13819	1.9021	-1.503	Jam2	junctional adhesion molecule 2	0.352819
1397238_at	0.00084	5.87e-05	-8.31835	2.06058	-1.50258			0.352923
1398627_at	0.00147	0.000136	-7.31527	1.13841	-1.50252	Mpp6	membrane palmitoylated protein 6	0.352937
1378316_at	0.013	0.00249	-4.52553	-2.04375	-1.50231	Tdrkh	tudor and KH domain containing	0.352989
1392637_at	0.0327	0.00791	-3.63091	-3.2911	-1.50175	LOC102549198	interferon-inducible GTPase 1-like	0.353124
1390262_a_at	0.0301	0.00712	-3.70908	-3.17784	-1.50113	Agap3	ArfGAP with GTPase domain, ankyrin repeat and PH domain 3	0.353278
1371731_at	0.0075	0.00123	-5.12213	-1.27529	-1.50083	Mest	mesoderm specific transcript	0.35335
1391476_at	0.0438	0.0114	-3.36792	-3.67739	-1.49978			0.353608
1382134_at	0.0302	0.00713	-3.70761	-3.17997	-1.49957	Olfml1	olfactomedin-like 1	0.353659
1393847_at	0.0232	0.00515	-3.95289	-2.82957	-1.49762	Nkiras1	NFKB inhibitor interacting Ras-like 1	0.354138
1377786_at	0.000542	3.08e-05	-9.1595	2.76311	-1.49715			0.354254
1388738_at	0.0194	0.00412	-4.12525	-2.58817	-1.49611	Atrnl1	attractin like 1	0.354509
1374503_at	0.00131	0.000115	-7.50657	1.32201	-1.49596	Pbx3	PBX homeobox 3	0.354545
1370941_at	0.0341	0.00833	-3.59316	-3.34607	-1.49572	Pdgfra	platelet derived growth factor receptor alpha	0.354603
1387968_at	0.000437	2.19e-05	-9.63568	3.13555	-1.49515	Slc6a15	solute carrier family 6 member 15	0.354743
1385717_at	0.00159	0.000151	-7.19699	1.02294	-1.49474	Gdap1	ganglioside-induced differentiation-associated-protein 1	0.354844
1368239_at	0.00281	0.000333	-6.35535	0.15587	-1.49447	Lrp3	LDL receptor related protein 3	0.354911
1387698_at	0.000904	6.58e-05	-8.175	1.93472	-1.49433	Kcnj11	potassium voltage-gated channel subfamily J member 11	0.354944
1384381_at	0.196	0.0783	-2.0493	-5.66521	-1.49419	Abca1	ATP binding cassette subfamily A member 1	0.354981
1393345_at	0.0024	0.000268	-6.57943	0.39482	-1.49385	Asph	aspartate-beta-hydroxylase	0.355064
1370550_at	0.000534	3.02e-05	-9.18741	2.78542	-1.49306	Lsamp	limbic system-associated membrane protein	0.355258
1378805_at	0.000526	2.96e-05	-9.21642	2.80854	-1.49283			0.355315
1374419_at	0.00105	8.27e-05	-7.89589	1.68416	-1.49195			0.355533
1383444_at	0.000818	5.63e-05	-8.36906	2.10466	-1.49173	Slc24a2	solute carrier family 24 member 2	0.355586
1378817_at	0.0246	0.00556	-3.89469	-2.912	-1.4898	Itsn1	intersectin 1	0.356062
1395415_at	0.000302	1.21e-05	-10.5134	3.77937	-1.48953	Tcaf1	TRPM8 channel-associated factor 1	0.356129
1383194_a_at	0.00185	0.000186	-6.9663	0.79336	-1.48902			0.356253
1390997_at	0.0135	0.0026	-4.48944	-2.09188	-1.48846	Idua	iduronidase, alpha-L-	0.356392
1374830_at	0.00025	8.81e-06	-11.0094	4.12094	-1.48765	Ccdc3	coiled-coil domain containing 3	0.356592
1396193_at	0.000365	1.65e-05	-10.0495	3.44568	-1.48559			0.357104
1396058_at	0.000103	1.85e-06	-13.7841	5.78667	-1.48556	Igip	IgA-inducing protein	0.35711
1379562_at	0.00284	0.000339	-6.33773	0.13683	-1.48458			0.357352
1370063_at	0.202	0.0818	-2.0196	-5.70877	-1.48375	Nr2f2	nuclear receptor subfamily 2, group F, member 2	0.357559
1390146_at	0.00381	0.000504	-5.94607	-0.2967	-1.48328	Tmem150c	transmembrane protein 150C	0.357675
1368660_at	0.0106	0.0019	-4.75153	-1.74658	-1.48307	Rapgef3	Rap guanine nucleotide exchange factor 3	0.357726
1372434_at	0.000366	1.65e-05	-10.0438	3.44146	-1.48209			0.35797
1376784_at	0.000237	7.99e-06	-11.1678	4.22683	-1.4808	Fnbp1	formin binding protein 1	0.35829
1381074_at	0.000123	2.55e-06	-13.1684	5.44883	-1.48075	Cyp2j3	cytochrome P450, family 2, subfamily j, polypeptide 3	0.358303
1377957_at	0.000682	4.33e-05	-8.70559	2.39144	-1.47931			0.35866
1393414_at	0.00742	0.00121	-5.13364	-1.26096	-1.47849	Tmem64///LOC686461	transmembrane protein 64///hypothetical protein LOC686461	0.358864
1382088_at	0.0119	0.00223	-4.61497	-1.92526	-1.47824	Ryr2	ryanodine receptor 2	0.358927
1395020_at	0.388	0.324	-1.05731	-6.95359	-1.47719	Plekhh1	pleckstrin homology, MyTH4 and FERM domain containing H1	0.359188
1377091_at	0.0073	0.00119	-5.15269	-1.23731	-1.47711	Prrt1	proline-rich transmembrane protein 1	0.359208
1368262_at	0.00028	1.06e-05	-10.718	3.92214	-1.47509	Phlpp1	PH domain and leucine rich repeat protein phosphatase 1	0.359712
1369839_at	0.000925	6.82e-05	-8.13121	1.89589	-1.47506	LOC100910792///LOC100909679///Amph	amphiphysin-like///amphiphysin-like///amphiphysin	0.359718
1374417_at	0.00926	0.00162	-4.88515	-1.57437	-1.47497	Nrbp2	nuclear receptor binding protein 2	0.35974
1372539_at	0.00257	0.000295	-6.47933	0.28882	-1.47494			0.359747
1393596_at	0.0156	0.00312	-4.34508	-2.28634	-1.47484	Atrx	ATRX, chromatin remodeler	0.359773
1377458_at	0.000395	1.84e-05	-9.885	3.32385	-1.47407	LOC102547257///Sorl1	sortilin-related receptor-like///sortilin related receptor 1	0.359966
1372864_at	0.0562	0.0155	-3.14612	-4.00862	-1.47374			0.360048
1387873_at	0.0414	0.0106	-3.41828	-3.60283	-1.47309	Wfdc1	WAP four-disulfide core domain 1	0.36021
1372301_at	0.0049	0.000702	-5.63002	-0.66109	-1.47235	Aebp1	AE binding protein 1	0.360396
1383328_x_at	0.000256	9.26e-06	-10.9303	4.0675	-1.47151	Pdcd4	programmed cell death 4	0.360605
1369022_at	0.00115	9.41e-05	-7.74185	1.54268	-1.47011	Svop	SV2 related protein	0.360954
1390398_at	0.0104	0.00187	-4.76481	-1.72935	-1.46867			0.361314
1370559_at	0.0227	0.00503	-3.97056	-2.80464	-1.46834	Kcnc2	potassium voltage-gated channel subfamily C member 2	0.361398
1377445_at	0.0341	0.00833	-3.5932	-3.34601	-1.46829			0.36141
1382867_at	0.0293	0.00687	-3.73534	-3.13997	-1.46789			0.361511
1376232_at	0.00114	9.33e-05	-7.75194	1.55202	-1.46641			0.361881
1397884_at	0.00747	0.00123	-5.12628	-1.27012	-1.46495	Sel1l3	SEL1L family member 3	0.362248
1389737_at	0.00236	0.000261	-6.6058	0.42254	-1.46467	Dtna	dystrobrevin, alpha	0.362318
1385031_at	0.00658	0.00103	-5.27623	-1.08511	-1.46463			0.362327
1378091_at	0.00581	0.000881	-5.42052	-0.91008	-1.46324			0.362677
1374236_at	0.00552	0.000824	-5.48175	-0.83668	-1.46296			0.362748
1391653_at	0.00027	1e-05	-10.8028	3.98049	-1.46246	Gabrg2	gamma-aminobutyric acid type A receptor gamma 2 subunit	0.362874
1378871_at	0.00129	0.000113	-7.52542	1.3399	-1.45999	Adgrb2	adhesion G protein-coupled receptor B2	0.363497
1397484_at	0.0395	0.00999	-3.46077	-3.54014	-1.45884	Dnal1	dynein, axonemal, light chain 1	0.363786
1387923_at	0.0018	0.000181	-7.00016	0.82743	-1.45756	Rnf112	ring finger protein 112	0.364107
1382205_at	0.011	0.002	-4.70646	-1.80525	-1.45697			0.364257
1369791_at	0.00113	9.24e-05	-7.7638	1.56298	-1.45581	Clcn4	chloride voltage-gated channel 4	0.364551
1382544_at	0.00389	0.000517	-5.91994	-0.32633	-1.45506	Entpd5	ectonucleoside triphosphate diphosphohydrolase 5	0.36474
1383566_at	0.000955	7.14e-05	-8.07377	1.8447	-1.45382	LOC100913073	uncharacterized LOC100913073	0.365053
1380345_at	0.00421	0.000574	-5.81972	-0.44078	-1.45376	Rimkla	ribosomal modification protein rimK-like family member A	0.36507
1396409_at	0.000221	7.03e-06	-11.377	4.36452	-1.45349	Dtnb	dystrobrevin, beta	0.365138
1388689_at	0.00191	0.000194	-6.92037	0.74694	-1.45343	Acyp2	acylphosphatase 2	0.365153
1397607_at	0.00927	0.00162	-4.88424	-1.57554	-1.45227	Crebrf	CREB3 regulatory factor	0.365445
1383646_at	0.00567	0.000856	-5.44716	-0.87809	-1.45224			0.365455
1390240_at	0.000285	1.09e-05	-10.6733	3.89117	-1.44974			0.366087
1398476_at	0.241	0.109	-1.82602	-5.98791	-1.44932	Vcl	vinculin	0.366193
1379906_at	0.000112	2.14e-06	-13.4979	5.63162	-1.44718	Atp1b2	ATPase Na+/K+ transporting subunit beta 2	0.366737
1386716_at	0.00549	0.000819	-5.48792	-0.82931	-1.4469	Paqr8	progestin and adipoQ receptor family member 8	0.36681
1386961_at	0.000295	1.16e-05	-10.5798	3.82597	-1.44687	Pfkm	phosphofructokinase, muscle	0.366816
1392947_at	0.000465	2.43e-05	-9.48583	3.0202	-1.44561			0.367136
1390156_a_at	0.000589	3.49e-05	-8.99185	2.62779	-1.44547	Prickle2	prickle planar cell polarity protein 2	0.367173
1369770_at	0.00296	0.000359	-6.28032	0.07448	-1.44506	Sstr1	somatostatin receptor 1	0.367277
1397246_at	0.0046	0.000649	-5.7038	-0.57483	-1.44473	Ntrk2	neurotrophic receptor tyrosine kinase 2	0.367361
1382183_at	0.00768	0.00127	-5.09168	-1.31327	-1.44465	Mpp7	membrane palmitoylated protein 7	0.36738
1392952_at	0.00131	0.000116	-7.50084	1.31658	-1.44459	Acsf2	acyl-CoA synthetase family member 2	0.367397
1397637_at	0.00271	0.000319	-6.40071	0.20473	-1.4441			0.36752
1378298_at	0.00454	0.000636	-5.72271	-0.55284	-1.44379	Igsf21	immunoglobin superfamily, member 21	0.367601
1377142_at	0.00114	9.33e-05	-7.75229	1.55235	-1.443	Trpm3	transient receptor potential cation channel, subfamily M, member 3	0.367802
1368255_at	0.000135	2.94e-06	-12.9023	5.29765	-1.44073	Ntm	neurotrimin	0.36838
1382235_at	9.93e-05	1.73e-06	-13.9161	5.85701	-1.43916	Nadk2	NAD kinase 2, mitochondrial	0.368781
1387291_at	0.000422	2.06e-05	-9.71931	3.19922	-1.43843	Itih3	inter-alpha trypsin inhibitor, heavy chain 3	0.36897
1367950_at	0.0224	0.00493	-3.98696	-2.78153	-1.43746	Slc22a5	solute carrier family 22 member 5	0.369217
1370966_at	0.00266	0.000311	-6.427	0.23294	-1.43696	Hcn2	hyperpolarization activated cyclic nucleotide-gated potassium channel 2	0.369345
1384309_at	0.0185	0.00388	-4.17214	-2.52322	-1.43604			0.369581
1391326_at	0.000285	1.09e-05	-10.6698	3.88869	-1.43578			0.369648
1373912_at	0.00072	4.68e-05	-8.60597	2.30757	-1.43503	Enpp4	ectonucleotide pyrophosphatase/phosphodiesterase 4	0.36984
1398245_at	0.000889	6.4e-05	-8.20891	1.96466	-1.43374	Sncg	synuclein, gamma	0.370171
1390430_at	8.76e-05	1.33e-06	-14.4439	6.13139	-1.43345	Nr1d2	nuclear receptor subfamily 1, group D, member 2	0.370244
1396000_at	0.00187	0.000189	-6.95154	0.77847	-1.43331	Tmem144	transmembrane protein 144	0.37028
1390159_at	0.00437	0.000605	-5.77057	-0.49739	-1.43256	Rasgrp3	RAS guanyl releasing protein 3	0.370473
1397569_at	0.0561	0.0155	-3.14916	-4.00406	-1.43157			0.370727
1393846_at	0.027	0.00624	-3.80776	-3.03595	-1.43112	Fam107a	family with sequence similarity 107, member A	0.370843
1380763_at	0.00172	0.000169	-7.07306	0.90034	-1.42947	Strbp	spermatid perinuclear RNA binding protein	0.371268
1372372_at	0.000174	4.54e-06	-12.1172	4.83221	-1.42881	Cmbl	carboxymethylenebutenolidase homolog	0.371436
1383800_at	0.000478	2.55e-05	-9.42222	2.97072	-1.42822	Fam155a	family with sequence similarity 155, member A	0.37159
1379413_at	0.00113	9.2e-05	-7.76879	1.56759	-1.42816	Nmnat1	nicotinamide nucleotide adenylyltransferase 1	0.371606
1376691_at	0.0379	0.00951	-3.49622	-3.48798	-1.42768	Tmem64	transmembrane protein 64	0.371728
1383981_at	8.65e-05	1.29e-06	-14.5079	6.16391	-1.42669	Tp53bp2	tumor protein p53 binding protein, 2	0.371984
1375476_at	0.00252	0.000287	-6.50819	0.31951	-1.42607	Pygm	phosphorylase, glycogen, muscle	0.372144
1377795_at	9.41e-05	1.55e-06	-14.1427	5.97612	-1.42571			0.372236
1394490_at	0.033	0.00799	-3.62375	-3.30151	-1.42496	Abca1	ATP binding cassette subfamily A member 1	0.372431
1383642_at	0.000645	3.98e-05	-8.8173	2.48448	-1.42452			0.372544
1377738_a_at	8.76e-05	1.33e-06	-14.447	6.13297	-1.42442	Cyhr1	cysteine and histidine rich 1	0.372569
1390901_at	4.91e-05	4.12e-07	-17.058	7.34527	-1.42414	Igsf10	immunoglobulin superfamily, member 10	0.372641
1373165_at	0.00174	0.000172	-7.05165	0.87898	-1.4224	Zmat1	zinc finger, matrin-type 1	0.37309
1387327_at	0.0442	0.0115	-3.35879	-3.69094	-1.42236	Khdrbs2	KH RNA binding domain containing, signal transduction associated 2	0.373101
1395986_at	0.00557	0.000836	-5.46892	-0.85202	-1.42203	Slit2	slit guidance ligand 2	0.373186
1393174_at	0.000244	8.34e-06	-11.0979	4.1803	-1.42151	Fam171b	family with sequence similarity 171, member B	0.37332
1375582_at	0.000923	6.8e-05	-8.13419	1.89855	-1.42117	Zfhx4	zinc finger homeobox 4	0.37341
1390358_at	0.0091	0.00158	-4.90341	-1.55103	-1.42107	Cacna2d3	calcium voltage-gated channel auxiliary subunit alpha2delta 3	0.373436
1385334_at	0.0037	0.000484	-5.98434	-0.25347	-1.42097	Fam149a	family with sequence similarity 149, member A	0.37346
1389514_at	0.00172	0.00017	-7.07029	0.89758	-1.42005	Lingo1	leucine rich repeat and Ig domain containing 1	0.373699
1383064_at	0.00021	6.41e-06	-11.5299	4.46358	-1.42003			0.373705
1384065_at	0.000669	4.19e-05	-8.74901	2.42773	-1.41869			0.374053
1385744_at	0.0711	0.0209	-2.9385	-4.32215	-1.41809			0.374207
1382274_at	0.00119	0.000101	-7.66386	1.47015	-1.41738	Rarres1	retinoic acid receptor responder 1	0.374391
1371014_at	0.00512	0.000745	-5.57506	-0.72583	-1.41707	Plcb1	phospholipase C beta 1	0.374472
1370430_at	0.000445	2.26e-05	-9.59306	3.10291	-1.41525	LOC102556832///Lmo3	LIM domain only protein 3-like///LIM domain only 3	0.374945
1368646_at	0.0307	0.00731	-3.68943	-3.20624	-1.41469	Mapk9	mitogen-activated protein kinase 9	0.375092
1390818_at	0.00172	0.000168	-7.07841	0.90567	-1.4144	Tfdp2	transcription factor Dp-2	0.375166
1390033_at	0.103	0.0336	-2.61672	-4.81158	-1.41434	Cadm3	cell adhesion molecule 3	0.375182
1387464_at	0.0413	0.0106	-3.42055	-3.59947	-1.41428	Glra1	glycine receptor, alpha 1	0.375196
1394436_at	0.00457	0.000644	-5.7116	-0.56575	-1.41395	Spag9	sperm associated antigen 9	0.375283
1384651_at	0.0212	0.0046	-4.0393	-2.70804	-1.41374			0.375338
1368381_at	0.0401	0.0102	-3.44677	-3.56077	-1.41361	Crtac1	cartilage acidic protein 1	0.37537
1376495_at	0.00636	0.00099	-5.31532	-1.03741	-1.41288	Sptb	spectrin, beta, erythrocytic	0.37556
1385431_at	0.000337	1.44e-05	-10.2488	3.5908	-1.41241	Zfp106	zinc finger protein 106	0.375682
1393589_at	0.00479	0.00068	-5.65989	-0.62608	-1.41237	Klhl4	kelch-like family member 4	0.375693
1390474_at	0.0108	0.00196	-4.72292	-1.78379	-1.41229	Nipal2	NIPA-like domain containing 2	0.375714
1369689_at	0.00314	0.000387	-6.20496	-0.00796	-1.41223	Nsf	N-ethylmaleimide sensitive factor, vesicle fusing ATPase	0.375731
1379753_at	0.0109	0.00198	-4.71533	-1.79367	-1.41135	Pex5l	peroxisomal biogenesis factor 5-like	0.375959
1373909_at	0.000296	1.17e-05	-10.5682	3.81789	-1.41069	Tmem64	transmembrane protein 64	0.376132
1393410_at	0.058	0.0161	-3.11938	-4.04885	-1.40976	Cntnap2	contactin associated protein-like 2	0.376375
1390456_at	5.6e-05	5.55e-07	-16.3563	7.04105	-1.40956			0.376425
1371007_at	0.00742	0.00121	-5.13389	-1.26065	-1.40948	Epha5	EPH receptor A5	0.376448
1379451_at	0.0548	0.015	-3.16947	-3.97356	-1.40917	Ssbp2	single-stranded DNA binding protein 2	0.376528
1396300_at	0.0157	0.00314	-4.33852	-2.29524	-1.40892	Afmid	arylformamidase	0.376594
1388052_a_at	0.0331	0.00803	-3.62032	-3.3065	-1.40845	Kcnq3	potassium voltage-gated channel subfamily Q member 3	0.376717
1369886_a_at	0.000412	1.99e-05	-9.77352	3.24021	-1.40812	Cabp1	calcium binding protein 1	0.376802
1376987_at	0.00109	8.79e-05	-7.8232	1.61769	-1.40754	Lrrc49	leucine rich repeat containing 49	0.376955
1381063_at	0.00029	1.13e-05	-10.6202	3.85424	-1.4075			0.376964
1393590_at	0.0389	0.0098	-3.47502	-3.51915	-1.40735	LOC100910384///Col23a1	collagen alpha-1(XXIII) chain-like///collagen type XXIII alpha 1 chain	0.377003
1390943_at	0.000689	4.39e-05	-8.68949	2.37794	-1.40722	Rsrp1	arginine and serine rich protein 1	0.377038
1373108_at	0.000255	9.23e-06	-10.9351	4.07071	-1.40719	Ppp1r3c	protein phosphatase 1, regulatory subunit 3C	0.377045
1381574_at	0.00263	0.000305	-6.44483	0.25202	-1.40651	Agmo	alkylglycerol monooxygenase	0.377222
1395273_at	7.13e-05	8.68e-07	-15.3507	6.57833	-1.40616	Ahcyl1	adenosylhomocysteinase-like 1	0.377313
1385630_at	0.033	0.008	-3.62271	-3.30303	-1.40509			0.377594
1386080_at	0.000275	1.03e-05	-10.7577	3.94954	-1.40495	Hey1	hes-related family bHLH transcription factor with YRPW motif 1	0.377632
1376878_at	0.0015	0.000139	-7.28805	1.11197	-1.4047	RGD1559896	similar to RIKEN cDNA 2310022B05	0.377696
1390793_at	0.0112	0.00204	-4.68878	-1.82834	-1.40398	Ttc33	tetratricopeptide repeat domain 33	0.377885
1395601_at	0.00754	0.00124	-5.11418	-1.2852	-1.40354	Nudt12	nudix hydrolase 12	0.378
1397227_at	0.00161	0.000155	-7.17035	0.99673	-1.40224	Tmem35	transmembrane protein 35	0.378341
1384229_at	0.00334	0.00042	-6.12423	-0.09707	-1.4021	Gnal	G protein subunit alpha L	0.378379
1368698_at	0.00134	0.00012	-7.45995	1.27763	-1.40204	Atp2b2	ATPase plasma membrane Ca2+ transporting 2	0.378394
1375997_at	0.000638	3.92e-05	-8.83569	2.4997	-1.40137	RGD1311756	similar to hypothetical protein FLJ20950	0.37857
1394455_at	0.000437	2.19e-05	-9.63633	3.13605	-1.4012	Fgf12	fibroblast growth factor 12	0.378615
1378164_at	0.0162	0.00328	-4.30463	-2.34136	-1.40064	Hepacam	hepatic and glial cell adhesion molecule	0.37876
1384110_at	0.000861	6.1e-05	-8.26979	2.01815	-1.39997			0.378938
1393198_at	0.00216	0.000231	-6.7338	0.55592	-1.39982	Pcmtd1	protein-L-isoaspartate (D-aspartate) O-methyltransferase domain containing 1	0.378975
1368411_a_at	0.0142	0.00278	-4.43545	-2.16426	-1.39958	Map2	microtubule-associated protein 2	0.37904
1374648_at	0.00119	0.0001	-7.66508	1.4713	-1.39818	Gpr155	G protein-coupled receptor 155	0.379407
1371140_a_at	0.000872	6.21e-05	-8.24661	1.99783	-1.39804	Asic2	acid sensing ion channel subunit 2	0.379445
1387445_at	0.0667	0.0193	-2.99542	-4.23593	-1.398	Phkg1	phosphorylase kinase, gamma 1	0.379453
1393547_at	0.00607	0.000933	-5.36905	-0.97219	-1.39742	Rnf182	ring finger protein 182	0.379607
1374038_at	0.000509	2.8e-05	-9.29158	2.86815	-1.39707			0.3797
1373084_at	0.0201	0.0043	-4.09166	-2.6349	-1.39695	Wdr20	WD repeat domain 20	0.379732
1374389_at	0.0118	0.0022	-4.62838	-1.90759	-1.39676	Gucy1b3	guanylate cyclase 1 soluble subunit beta 3	0.379782
1377153_a_at	0.0802	0.0244	-2.83342	-4.48172	-1.39554	Klhl6	kelch-like family member 6	0.380102
1380017_at	0.00336	0.000424	-6.11437	-0.10802	-1.39533	Rbms3	RNA binding motif, single stranded interacting protein 3	0.380159
1378245_at	0.00928	0.00162	-4.88316	-1.57691	-1.39486	Fam81a	family with sequence similarity 81, member A	0.380281
1373250_at	0.000287	1.1e-05	-10.6537	3.87753	-1.39398	Anln///Anlnl1	anillin, actin binding protein///anillin, actin binding protein-like 1	0.380515
1378988_at	0.00193	0.000197	-6.90402	0.73037	-1.39295	Mab21l2	mab-21 like 2	0.380785
1372754_at	0.000331	1.41e-05	-10.2832	3.61554	-1.39278	Appl2	adaptor protein, phosphotyrosine interacting with PH domain and leucine zipper 2	0.38083
1369816_at	0.000625	3.82e-05	-8.87057	2.52848	-1.39261	Rab3a	RAB3A, member RAS oncogene family	0.380876
1378413_at	0.0195	0.00415	-4.11859	-2.59742	-1.39227			0.380966
1374593_at	0.000751	4.99e-05	-8.52405	2.23796	-1.39209	Prkce	protein kinase C, epsilon	0.381012
1383390_at	0.00897	0.00156	-4.91866	-1.53158	-1.39207	Amer2	APC membrane recruitment protein 2	0.381016
1383637_at	0.00211	0.000225	-6.76518	0.58833	-1.39054	Klf12	Kruppel-like factor 12	0.381421
1396337_at	0.00533	0.000786	-5.5253	-0.78479	-1.39044			0.381448
1368524_at	0.0241	0.00542	-3.91377	-2.88492	-1.38998	Kcnc1	potassium voltage-gated channel subfamily C member 1	0.38157
1392607_at	0.00195	0.000201	-6.88397	0.70999	-1.38744	Epb41	erythrocyte membrane protein band 4.1	0.382242
1389584_at	0.00119	0.0001	-7.66601	1.47216	-1.38733			0.382271
1367791_at	0.00201	0.000209	-6.84149	0.66667	-1.38647	Ramp1	receptor activity modifying protein 1	0.3825
1395590_at	0.00415	0.000563	-5.83909	-0.41855	-1.38637	LOC102549278	zinc finger CCCH-type antiviral protein 1-like	0.382526
1380486_at	0.000256	9.27e-06	-10.9289	4.06651	-1.38633	Sec22c	SEC22 homolog C, vesicle trafficking protein	0.382538
1381646_at	0.214	0.089	-1.96305	-5.79123	-1.38603			0.382617
1383708_at	0.00788	0.00132	-5.06275	-1.34947	-1.38594	Itgbl1	integrin subunit beta like 1	0.38264
1389231_at	0.16	0.0593	-2.235	-5.38944	-1.38593	Sgip1	SH3-domain GRB2-like (endophilin) interacting protein 1	0.382644
1382812_at	0.014	0.00274	-4.4488	-2.14633	-1.38538	RGD1310429	similar to Protein Njmu-R1	0.38279
1378197_at	0.0169	0.00344	-4.26527	-2.39513	-1.38311	Kifc2	kinesin family member C2	0.383393
1389240_at	0.0112	0.00204	-4.68873	-1.82841	-1.38279			0.383475
1372163_at	0.0048	0.000683	-5.65527	-0.63148	-1.38277			0.383481
1371479_at	0.000157	3.86e-06	-12.4041	5.00578	-1.3826	Mettl7a	methyltransferase like 7A	0.383528
1372695_at	0.000308	1.26e-05	-10.45	3.73461	-1.38216	Fndc5	fibronectin type III domain containing 5	0.383644
1377161_at	0.00135	0.000121	-7.45034	1.26844	-1.38209			0.383664
1392877_at	0.00473	0.00067	-5.6734	-0.61028	-1.38201	LOC102552880	uncharacterized LOC102552880	0.383683
1379356_at	0.000721	4.69e-05	-8.60192	2.30414	-1.38185	Fam102b	family with sequence similarity 102, member B	0.383727
1397772_at	0.00217	0.000233	-6.72905	0.55102	-1.38164	Paqr8	progestin and adipoQ receptor family member 8	0.383783
1391212_at	0.000185	5.11e-06	-11.9129	4.70602	-1.38159	Tceal1	transcription elongation factor A like 1	0.383794
1379932_at	0.00028	1.06e-05	-10.7215	3.92456	-1.38154	Clcn4	chloride voltage-gated channel 4	0.383808
1388237_s_at	0.0217	0.00474	-4.01674	-2.73967	-1.38144	Atp2b3	ATPase plasma membrane Ca2+ transporting 3	0.383836
1387178_a_at	0.00375	0.000492	-5.96824	-0.27163	-1.38122	Cbs	cystathionine beta synthase	0.383893
1391036_at	0.00532	0.000784	-5.52833	-0.78119	-1.38099	Iqsec3	IQ motif and Sec7 domain 3	0.383956
1371570_at	0.00226	0.000246	-6.66844	0.48806	-1.38087			0.383987
1389653_at	0.101	0.0328	-2.63281	-4.78708	-1.38018	Pcdhb9	protocadherin beta 9	0.384171
1397173_at	0.000978	7.46e-05	-8.02017	1.79664	-1.38017			0.384175
1385597_at	0.00195	0.000201	-6.88599	0.71204	-1.3793	Zfp763	zinc finger protein 763	0.384406
1368536_at	0.000193	5.53e-06	-11.7778	4.62139	-1.37775	Enpp2	ectonucleotide pyrophosphatase/phosphodiesterase 2	0.384817
1390051_at	0.0195	0.00414	-4.1218	-2.59297	-1.3773	Mtus2	microtubule associated tumor suppressor candidate 2	0.384939
1382137_at	0.000345	1.5e-05	-10.1885	3.54717	-1.37723	Abhd3	abhydrolase domain containing 3	0.384957
1387022_at	0.000854	6.01e-05	-8.288	2.0341	-1.37687	Aldh1a1	aldehyde dehydrogenase 1 family, member A1	0.385054
1393066_at	0.00187	0.000189	-6.94962	0.77653	-1.37623	Sec22c	SEC22 homolog C, vesicle trafficking protein	0.385223
1383673_at	0.00178	0.000177	-7.02273	0.85007	-1.37563	Nap1l2	nucleosome assembly protein 1-like 2	0.385386
1375303_at	0.0303	0.00718	-3.70266	-3.18712	-1.37538	Ldb3	LIM domain binding 3	0.385451
1393705_at	0.286	0.166	-1.54076	-6.37872	-1.37436			0.385724
1384469_at	0.0116	0.00216	-4.64431	-1.88664	-1.37327	Abca5	ATP binding cassette subfamily A member 5	0.386017
1378367_at	0.0137	0.00266	-4.47205	-2.11516	-1.37249			0.386224
1376945_at	0.000632	3.87e-05	-8.8544	2.51515	-1.37238			0.386253
1396103_at	0.0107	0.00194	-4.73153	-1.77257	-1.37233	Cmbl	carboxymethylenebutenolidase homolog	0.386267
1374969_at	0.000609	3.68e-05	-8.92056	2.56956	-1.3713			0.386542
1370016_at	0.116	0.0389	-2.51702	-4.96327	-1.37095	Nell2	neural EGFL like 2	0.386637
1376829_at	0.00402	0.000542	-5.87534	-0.3771	-1.37066			0.386715
1390227_at	0.00289	0.000348	-6.31288	0.1099	-1.37037	Pcp4l1	Purkinje cell protein 4-like 1	0.386793
1378246_at	0.00387	0.000513	-5.92728	-0.31799	-1.37013	Pptc7	PTC7 protein phosphatase homolog	0.386856
1379073_at	0.0123	0.00233	-4.58117	-1.9699	-1.3695	Slc25a23	solute carrier family 25 member 23	0.387025
1389082_at	0.000132	2.85e-06	-12.9587	5.32994	-1.36844	Fam63b	family with sequence similarity 63, member B	0.38731
1392315_at	0.000189	5.31e-06	-11.8495	4.6664	-1.36771			0.387505
1389107_at	0.00757	0.00125	-5.10969	-1.29079	-1.36656	Cgnl1	cingulin-like 1	0.387816
1382375_at	0.012	0.00224	-4.61112	-1.93033	-1.366			0.387964
1373188_at	0.0383	0.00964	-3.48667	-3.50201	-1.36491	Scn4b	sodium voltage-gated channel beta subunit 4	0.388259
1398649_at	0.0844	0.026	-2.78943	-4.54862	-1.36464	Slitrk3	SLIT and NTRK-like family, member 3	0.388332
1395294_at	0.00107	8.54e-05	-7.85728	1.64892	-1.36433			0.388416
1377014_at	0.0035	0.000446	-6.06401	-0.16409	-1.36425	Nim1k	NIM1 serine/threonine protein kinase	0.388438
1379824_at	6.33e-05	6.77e-07	-15.9008	6.83551	-1.36403	Tox	thymocyte selection-associated high mobility group box	0.388496
1383004_at	5.43e-05	5.1e-07	-16.5524	7.12753	-1.36383	Ahcyl1	adenosylhomocysteinase-like 1	0.388549
1377513_at	0.0229	0.00507	-3.96416	-2.81366	-1.36108			0.389291
1377649_at	0.00106	8.33e-05	-7.88768	1.67668	-1.36064			0.389411
1369715_at	0.189	0.074	-2.08655	-5.61033	-1.36043	Slc6a11	solute carrier family 6 member 11	0.389467
1373773_at	5.58e-05	5.45e-07	-16.3986	7.0598	-1.3589	Gpm6a	glycoprotein m6a	0.38988
1393666_at	0.00041	1.96e-05	-9.79089	3.2533	-1.35796			0.390133
1372345_at	0.000495	2.69e-05	-9.34893	2.91334	-1.35722			0.390334
1369677_at	0.0409	0.0104	-3.42948	-3.58629	-1.35685	Cnr1	cannabinoid receptor 1	0.390435
1370541_at	9.08e-05	1.43e-06	-14.2995	6.05737	-1.35509	Nr1d2	nuclear receptor subfamily 1, group D, member 2	0.390911
1390043_at	0.0054	0.0008	-5.50865	-0.8046	-1.3547	Smarcc2	SWI/SNF related, matrix associated, actin dependent regulator of chromatin, subfamily c, member 2	0.391015
1370439_a_at	0.000596	3.57e-05	-8.96184	2.60332	-1.35441	Kcnc2	potassium voltage-gated channel subfamily C member 2	0.391095
1391348_at	0.0068	0.00108	-5.23368	-1.13729	-1.3538	Pank3	pantothenate kinase 3	0.391259
1391308_at	0.000494	2.67e-05	-9.35505	2.91815	-1.35257			0.391594
1374432_at	0.000307	1.24e-05	-10.4704	3.74902	-1.35198			0.391753
1376320_at	0.0374	0.00936	-3.50831	-3.47022	-1.35193			0.391768
1385108_at	0.00487	0.000697	-5.63679	-0.65314	-1.35048			0.392162
1391282_at	0.0412	0.0105	-3.42302	-3.59583	-1.35013	Slc18b1	solute carrier family 18 member B1	0.392257
1387130_at	0.000222	7.12e-06	-11.3566	4.3512	-1.34998	LOC100911874///Slc40a1	solute carrier family 40 member 1-like///solute carrier family 40 member 1	0.392296
1369471_at	0.00808	0.00137	-5.03131	-1.38895	-1.34737	LOC100909995///Fnbp1	formin-binding protein 1-like///formin binding protein 1	0.393009
1374298_at	0.0472	0.0125	-3.29966	-3.77884	-1.34659			0.39322
1385173_at	0.00362	0.000469	-6.01528	-0.21866	-1.3464	Ebf3///Ebf1	early B-cell factor 3///early B-cell factor 1	0.393273
1379511_at	0.00119	0.0001	-7.66963	1.47554	-1.34635			0.393286
1390052_at	0.0719	0.0212	-2.92962	-4.33562	-1.34625	LOC100912140	uncharacterized LOC100912140	0.393314
1373315_at	0.000272	1.02e-05	-10.7796	3.96456	-1.34507	Arnt2	aryl hydrocarbon receptor nuclear translocator 2	0.393635
1392778_at	0.102	0.0331	-2.6252	-4.79866	-1.34491	LOC102556259	uncharacterized LOC102556259	0.393678
1397505_at	0.0451	0.0118	-3.33998	-3.71886	-1.34488	Kif1a	kinesin family member 1A	0.393686
1378000_at	7.1e-05	8.49e-07	-15.4003	6.6019	-1.34387	Tmem178b	transmembrane protein 178B	0.393963
1396382_at	0.0125	0.00237	-4.56516	-1.9911	-1.34296	Ncs1	neuronal calcium sensor 1	0.394212
1392590_at	0.00062	3.77e-05	-8.88816	2.54296	-1.34198	Arhgap24	Rho GTPase activating protein 24	0.394479
1372268_at	0.00021	6.35e-06	-11.5453	4.47347	-1.34133			0.394658
1383191_at	0.126	0.0433	-2.44504	-5.07256	-1.34098	Ppp1r1a	protein phosphatase 1, regulatory (inhibitor) subunit 1A	0.394752
1387385_at	0.000172	4.5e-06	-12.1333	4.84205	-1.34053	Cntn1	contactin 1	0.394877
1391553_at	0.000451	2.32e-05	-9.55309	3.07218	-1.33944			0.395173
1381183_at	3.74e-05	1.84e-07	-19.1069	8.15664	-1.3393			0.395212
1388462_at	0.00566	0.000854	-5.44937	-0.87544	-1.33903	Sbk1	SH3 domain binding kinase 1	0.395287
1380272_at	0.000679	4.29e-05	-8.71945	2.40304	-1.339			0.395294
1375754_at	0.028	0.00652	-3.77445	-3.08371	-1.33818	Impact	impact RWD domain protein	0.395518
1391305_at	0.00457	0.000643	-5.71251	-0.5647	-1.33802			0.395563
1385543_at	0.00545	0.000812	-5.49603	-0.81964	-1.33726	Akap10	A-kinase anchoring protein 10	0.395772
1384927_at	0.000658	4.1e-05	-8.77862	2.45238	-1.33647	Tubb4a	tubulin, beta 4A class IVa	0.39599
1387961_at	0.000168	4.29e-06	-12.2201	4.89491	-1.33641	Opcml	opioid binding protein/cell adhesion molecule-like	0.396006
1370724_a_at	0.00552	0.000825	-5.48076	-0.83787	-1.3356	Nfia	nuclear factor I/A	0.396226
1398520_at	0.00365	0.000475	-6.00212	-0.23345	-1.3355	Plekhd1	pleckstrin homology and coiled-coil domain containing D1	0.396255
1384197_at	0.00114	9.3e-05	-7.75628	1.55603	-1.3339	Dlgap1	DLG associated protein 1	0.396695
1377742_at	0.000332	1.41e-05	-10.2774	3.61139	-1.33377	Pcmtd1	protein-L-isoaspartate (D-aspartate) O-methyltransferase domain containing 1	0.396731
1373398_at	0.0011	8.81e-05	-7.82028	1.61501	-1.33314	Trim37	tripartite motif-containing 37	0.396904
1370831_at	0.0971	0.031	-2.66962	-4.73103	-1.33216	Mgll	monoglyceride lipase	0.397172
1395736_at	0.000348	1.52e-05	-10.1702	3.5339	-1.33194	Dstyk	dual serine/threonine and tyrosine protein kinase	0.397234
1391186_at	0.0076	0.00126	-5.10404	-1.29783	-1.3297			0.39785
1377648_at	0.00565	0.000851	-5.45254	-0.87164	-1.32897	Fam120b	family with sequence similarity 120B	0.398053
1373594_at	0.00264	0.000307	-6.4391	0.24588	-1.32735	Dnajc27	DnaJ heat shock protein family (Hsp40) member C27	0.398501
1382270_at	0.00804	0.00136	-5.03782	-1.38077	-1.32703			0.398588
1395362_at	0.0344	0.00843	-3.58425	-3.35907	-1.32703			0.398588
1389605_at	0.000777	5.26e-05	-8.45689	2.18046	-1.32516	Jakmip1	janus kinase and microtubule interacting protein 1	0.399104
1380726_at	0.00341	0.000433	-6.09434	-0.13028	-1.32467	Aspn	asporin	0.399242
1398466_at	0.0638	0.0182	-3.03491	-4.17622	-1.32404	Calr4	calreticulin 4	0.399416
1368542_at	0.000109	2.05e-06	-13.5844	5.67885	-1.32395	Zfp423	zinc finger protein 423	0.399439
1379902_at	0.000201	5.9e-06	-11.6683	4.55207	-1.32385	Eya1	EYA transcriptional coactivator and phosphatase 1	0.399467
1389877_at	0.119	0.04	-2.49808	-4.99205	-1.32365	Foxc1	forkhead box C1	0.399524
1387179_at	0.0508	0.0137	-3.23629	-3.87344	-1.32314	Adcy8	adenylate cyclase 8	0.399664
1380057_at	0.00775	0.00129	-5.08138	-1.32614	-1.32161			0.400089
1380497_at	0.197	0.0791	-2.04254	-5.67514	-1.32102	Ash1l	ASH1 like histone lysine methyltransferase	0.400252
1397774_at	0.00778	0.0013	-5.07595	-1.33294	-1.32053			0.400389
1382438_at	0.00995	0.00176	-4.81238	-1.66783	-1.32046			0.400407
1368858_at	0.00286	0.000342	-6.32936	0.12776	-1.32043	Ugt8	UDP glycosyltransferase 8	0.400417
1375767_at	0.000593	3.54e-05	-8.974	2.61325	-1.31984	Plekhg3	pleckstrin homology and RhoGEF domain containing G3	0.400579
1372658_at	0.00431	0.000594	-5.78795	-0.47734	-1.31835	Synm	synemin	0.400992
1378857_at	0.000497	2.7e-05	-9.34287	2.90858	-1.3172	Tceal5	transcription elongation factor A like 5	0.401312
1376027_at	0.00152	0.000142	-7.26634	1.09083	-1.31688	Bend6	BEN domain containing 6	0.401403
1388743_at	0.000876	6.27e-05	-8.23425	1.98698	-1.31681			0.401422
1369251_a_at	0.0263	0.00601	-3.83599	-2.99559	-1.31679	Syn1	synapsin I	0.401428
1397540_at	0.0112	0.00205	-4.68688	-1.83082	-1.31613			0.401611
1382319_at	0.000369	1.68e-05	-10.0211	3.4248	-1.31493	Gpr68	G protein-coupled receptor 68	0.401944
1389654_at	0.000394	1.83e-05	-9.89247	3.32943	-1.31482	Pls1	plastin 1	0.401975
1386653_at	0.000112	2.15e-06	-13.488	5.62622	-1.31418	Prickle2	prickle planar cell polarity protein 2	0.402153
1377011_at	0.000716	4.64e-05	-8.6166	2.31656	-1.31379	Fry	FRY microtubule binding protein	0.402262
1398581_at	0.000141	3.2e-06	-12.7433	5.20575	-1.31098			0.403048
1372276_at	0.000528	2.97e-05	-9.20792	2.80177	-1.31062	Agpat3	1-acylglycerol-3-phosphate O-acyltransferase 3	0.403149
1372728_at	0.000168	4.29e-06	-12.2166	4.89278	-1.31054	Sort1	sortilin 1	0.403169
1383433_at	0.000141	3.22e-06	-12.7314	5.19887	-1.30937	Klhl23	kelch-like family member 23	0.403497
1393665_at	0.295	0.181	-1.47817	-6.46021	-1.30916	Grm5	glutamate metabotropic receptor 5	0.403557
1392463_at	0.00471	0.000667	-5.67807	-0.60483	-1.30867	Map7d2	MAP7 domain containing 2	0.403692
1384734_at	0.00537	0.000793	-5.51757	-0.79398	-1.30801	Ncam2	neural cell adhesion molecule 2	0.403876
1372103_at	0.00162	0.000156	-7.16018	0.9867	-1.30786			0.403919
1374350_at	0.000223	7.18e-06	-11.3425	4.34199	-1.30689			0.40419
1390710_x_at	0.000256	9.3e-06	-10.9237	4.06296	-1.30525	Sorl1	sortilin related receptor 1	0.404651
1384043_at	0.0117	0.00219	-4.63342	-1.90096	-1.30458			0.40484
1374786_at	0.00567	0.000857	-5.44632	-0.8791	-1.30384			0.405047
1391855_at	0.00366	0.000478	-5.99681	-0.23942	-1.3029	Bcl7a	BCL tumor suppressor 7A	0.405311
1386885_at	9.83e-05	1.69e-06	-13.9685	5.88473	-1.30248	Ech1	enoyl-CoA hydratase 1	0.40543
1394923_at	0.108	0.0357	-2.57572	-4.87399	-1.3006	Nrip2	nuclear receptor interacting protein 2	0.405956
1393696_at	0.0288	0.00673	-3.75095	-3.11748	-1.30026	Fibin	fin bud initiation factor homolog (zebrafish)	0.406052
1378269_at	0.15	0.0544	-2.29274	-5.30273	-1.29985	Dnal1	dynein, axonemal, light chain 1	0.40617
1387029_at	0.00953	0.00168	-4.8558	-1.61197	-1.29974	Cfh	complement factor H	0.406201
1396619_at	0.037	0.00925	-3.51638	-3.45838	-1.29917			0.406361
1372000_at	0.00842	0.00144	-4.98655	-1.44541	-1.29882	Net1	neuroepithelial cell transforming 1	0.406459
1386911_at	0.0022	0.000237	-6.70873	0.52996	-1.29845	Atp1a2	ATPase Na+/K+ transporting subunit alpha 2	0.406562
1382789_at	0.00545	0.000811	-5.4964	-0.8192	-1.29829			0.406608
1395132_at	0.0213	0.00464	-4.03225	-2.71792	-1.29799	Utrn	utrophin	0.406693
1398433_at	0.00126	0.000109	-7.57126	1.38325	-1.2965			0.407113
1370706_a_at	0.000318	1.32e-05	-10.3753	3.68157	-1.29642	Cyp2j3	cytochrome P450, family 2, subfamily j, polypeptide 3	0.407134
1377628_at	0.0003	1.19e-05	-10.5328	3.793	-1.29633	Napb	NSF attachment protein beta	0.407162
1389572_at	0.00617	0.000954	-5.34867	-0.99688	-1.29628	Me3	malic enzyme 3	0.407175
1376441_at	0.000472	2.49e-05	-9.45446	2.99584	-1.29585	Pcnx4	pecanex homolog 4 (Drosophila)	0.407295
1373541_at	0.0024	0.000268	-6.57813	0.39344	-1.29546	Arhgef17	Rho guanine nucleotide exchange factor 17	0.407405
1372921_at	0.000181	4.91e-06	-11.9819	4.74887	-1.29506	Slc38a1	solute carrier family 38, member 1	0.40752
1375856_at	0.00668	0.00106	-5.25477	-1.1114	-1.29454			0.407665
1376165_at	0.000879	6.3e-05	-8.22807	1.98154	-1.29435	Slc24a3	solute carrier family 24 member 3	0.40772
1395433_at	0.0363	0.00903	-3.53413	-3.43236	-1.29308			0.408078
1398446_at	0.00294	0.000356	-6.28785	0.08269	-1.29281	Fam189b	family with sequence similarity 189, member B	0.408155
1377655_at	0.00482	0.000687	-5.65022	-0.6374	-1.29219	Fgf12	fibroblast growth factor 12	0.40833
1386611_at	0.00773	0.00129	-5.08454	-1.32219	-1.29192	Klhl24	kelch-like family member 24	0.408407
1370982_at	0.0012	0.000101	-7.65731	1.46403	-1.29181	Pygm	phosphorylase, glycogen, muscle	0.408439
1393229_at	0.0469	0.0124	-3.30466	-3.7714	-1.28855	Pmel	premelanosome protein	0.409364
1378323_at	0.0177	0.00367	-4.21537	-2.4636	-1.28818	Nol4	nucleolar protein 4	0.409468
1371538_at	0.00725	0.00118	-5.16151	-1.22637	-1.28759	Brsk1	BR serine/threonine kinase 1	0.409636
1369696_at	0.00997	0.00177	-4.80997	-1.67094	-1.28731	LOC100909655///RragB	ras-related GTP-binding protein B-like///Ras-related GTP binding B	0.409715
1391447_at	0.000341	1.47e-05	-10.2199	3.56994	-1.28725			0.409731
1375999_at	0.00399	0.000537	-5.88444	-0.36671	-1.28677	RGD1312005	similar to DD1	0.409868
1383254_at	0.00139	0.000127	-7.39392	1.21436	-1.28568			0.410177
1377181_at	0.000123	2.52e-06	-13.1853	5.45832	-1.28503	RGD1311575	hypothetical LOC289568	0.410361
1391571_at	0.0251	0.00571	-3.8746	-2.94056	-1.28449			0.410516
1370853_at	0.00932	0.00163	-4.87887	-1.58241	-1.28426	Camk2n1	calcium/calmodulin-dependent protein kinase II inhibitor 1	0.410581
1384225_at	0.0111	0.00202	-4.69692	-1.8177	-1.28419	Dab1	DAB1, reelin adaptor protein	0.4106
1378239_at	0.0169	0.00346	-4.26267	-2.39868	-1.28397	Gaa	glucosidase, alpha, acid	0.410665
1386012_at	0.000836	5.82e-05	-8.32703	2.06814	-1.28347			0.410805
1368484_at	0.00299	0.000365	-6.26453	0.05727	-1.28305	Abcb9	ATP binding cassette subfamily B member 9	0.410926
1378930_a_at	0.00487	0.000696	-5.6381	-0.65161	-1.2826	Rimklb	ribosomal modification protein rimK-like family member B	0.411053
1368105_at	0.00105	8.3e-05	-7.89146	1.68013	-1.28254	Tspan2	tetraspanin 2	0.41107
1380314_at	0.00493	0.000708	-5.62184	-0.6707	-1.28122	LOC100912566///RGD1563072	UPF0500 protein C1orf216 homolog///similar to hypothetical protein FLJ38984	0.411448
1391208_at	0.115	0.0383	-2.52713	-4.9479	-1.28066	Pcdh20	protocadherin 20	0.411607
1383661_at	0.0277	0.00641	-3.78679	-3.06599	-1.28008			0.411774
1383135_at	0.0031	0.000381	-6.21997	0.00852	-1.27989	Ntrk2	neurotrophic receptor tyrosine kinase 2	0.411828
1379720_at	0.00577	0.000875	-5.42745	-0.90175	-1.27836			0.412263
1383976_at	0.000563	3.26e-05	-9.08295	2.7016	-1.27701			0.412651
1370556_at	0.00522	0.000765	-5.55063	-0.75473	-1.27678	Vamp1	vesicle-associated membrane protein 1	0.412715
1390923_a_at	0.000542	3.08e-05	-9.15913	2.76281	-1.27672	Osbpl1a	oxysterol binding protein-like 1A	0.412734
1386817_at	0.114	0.0378	-2.5358	-4.93472	-1.27627	Cdk18	cyclin-dependent kinase 18	0.41286
1393636_at	0.00219	0.000235	-6.71685	0.53837	-1.27556			0.413065
1394422_at	0.011	0.00199	-4.7096	-1.80116	-1.27367	Ttll7	tubulin tyrosine ligase like 7	0.413606
1384191_at	0.0345	0.00846	-3.58155	-3.363	-1.27342			0.413679
1375945_at	0.000147	3.44e-06	-12.6145	5.13049	-1.27336	Plxdc2	plexin domain containing 2	0.413696
1380160_at	0.0619	0.0176	-3.06085	-4.13705	-1.27304	Drp2	dystrophin related protein 2	0.413786
1398645_at	0.00185	0.000187	-6.96538	0.79244	-1.27283	Wnt7a	wingless-type MMTV integration site family, member 7A	0.413848
1376707_at	0.0832	0.0256	-2.801	-4.53102	-1.27253	C1qtnf4	C1q and tumor necrosis factor related protein 4	0.413934
1383517_at	0.00446	0.000622	-5.74368	-0.5285	-1.27219			0.414031
1377974_at	0.00254	0.00029	-6.49863	0.30936	-1.27213			0.414049
1390317_at	0.000701	4.5e-05	-8.65715	2.35077	-1.27209	RGD1561849	similar to RIKEN cDNA 3110035E14	0.414059
1371625_at	0.00104	8.2e-05	-7.90707	1.69435	-1.27168	Pygb	phosphorylase, glycogen; brain	0.414179
1371062_at	9.83e-05	1.69e-06	-13.965	5.88289	-1.27131	Aldh5a1	aldehyde dehydrogenase 5 family, member A1	0.414285
1390766_at	0.0157	0.00315	-4.33756	-2.29654	-1.26951	Tuba8	tubulin, alpha 8	0.414801
1389532_at	0.000496	2.69e-05	-9.34746	2.91219	-1.26926			0.414873
1391173_at	0.000733	4.81e-05	-8.57169	2.27851	-1.26913	Trps1	transcriptional repressor GATA binding 1	0.414911
1369690_at	0.000915	6.72e-05	-8.14886	1.91157	-1.26848	Nsf	N-ethylmaleimide sensitive factor, vesicle fusing ATPase	0.415096
1368248_at	0.0132	0.00254	-4.50961	-2.06496	-1.26828	Cds1	CDP-diacylglycerol synthase 1	0.415154
1394056_at	0.00236	0.000261	-6.60912	0.42602	-1.26804	Nicn1	nicolin 1	0.415224
1383122_at	0.00318	0.000395	-6.18567	-0.02918	-1.2675	Prkag2	protein kinase AMP-activated non-catalytic subunit gamma 2	0.415378
1398624_x_at	3.66e-05	1.58e-07	-19.5144	8.3057	-1.26701	Tubb4a	tubulin, beta 4A class IVa	0.41552
1396833_at	0.00206	0.000219	-6.79446	0.61847	-1.26697			0.415533
1374454_at	0.00136	0.000122	-7.4364	1.25512	-1.26671	Pcmtd2	protein-L-isoaspartate (D-aspartate) O-methyltransferase domain containing 2	0.415607
1376869_at	0.000566	3.29e-05	-9.07269	2.69332	-1.26659	Tle4	transducin-like enhancer of split 4	0.415641
1383694_at	0.0075	0.00123	-5.12217	-1.27524	-1.26642	Rnf208	ring finger protein 208	0.415691
1379755_at	0.000445	2.26e-05	-9.59211	3.10218	-1.2662			0.415752
1380048_at	0.000888	6.39e-05	-8.21042	1.966	-1.26532			0.416006
1389786_at	8.34e-05	1.21e-06	-14.6395	6.23033	-1.26517			0.41605
1378855_a_at	0.00131	0.000116	-7.50194	1.31761	-1.26451	Tceal5///Tceal6///Tceal3	transcription elongation factor A like 5///transcription elongation factor A (SII)-like 6///transcription elongation factor A like 3	0.416241
1368092_at	0.00286	0.000342	-6.32914	0.12752	-1.26446	Fah	fumarylacetoacetate hydrolase	0.416255
1376734_at	0.0809	0.0247	-2.82642	-4.49235	-1.26354			0.416521
1380948_at	0.334	0.258	-1.22629	-6.76823	-1.26338			0.416567
1384007_at	0.00248	0.00028	-6.5357	0.34866	-1.2629	Atl1	atlastin GTPase 1	0.416706
1392893_a_at	0.00558	0.000837	-5.46796	-0.85317	-1.26234	Nacc2	NACC family member 2	0.416867
1383511_at	0.00119	9.94e-05	-7.67714	1.48255	-1.26176			0.417035
1388225_at	0.0073	0.00119	-5.1532	-1.23668	-1.26158	Kcnc2	potassium voltage-gated channel subfamily C member 2	0.417087
1373312_at	0.00388	0.000516	-5.92277	-0.32311	-1.26135	Pnkd	paroxysmal nonkinesigenic dyskinesia	0.417152
1389429_at	0.0459	0.0121	-3.32399	-3.74264	-1.26122			0.417191
1379336_at	0.000696	4.45e-05	-8.6709	2.36233	-1.26055			0.417384
1371773_at	0.000451	2.32e-05	-9.55321	3.07227	-1.25895			0.417848
1379292_at	0.0313	0.0075	-3.67029	-3.23394	-1.25888	Txndc16	thioredoxin domain containing 16	0.417868
1377457_a_at	0.000375	1.72e-05	-9.98797	3.40034	-1.25815	Sorl1	sortilin related receptor 1	0.41808
1377932_at	0.0262	0.006	-3.83677	-2.99448	-1.25805	Nacc2	NACC family member 2	0.41811
1382914_at	0.000477	2.54e-05	-9.42814	2.97534	-1.25796			0.418135
1374530_at	0.00451	0.000631	-5.73009	-0.54427	-1.25769			0.418212
1380741_at	0.00155	0.000147	-7.22924	1.05457	-1.2574			0.418298
1382621_at	0.0179	0.00371	-4.20764	-2.47424	-1.25701	Dcaf12	DDB1 and CUL4 associated factor 12	0.418409
1387226_at	0.00429	0.000589	-5.79544	-0.46871	-1.25672	Ina	internexin neuronal intermediate filament protein, alpha	0.418494
1377412_at	0.00539	0.000798	-5.51161	-0.80108	-1.25603	Chic1	cysteine-rich hydrophobic domain 1	0.418694
1391488_at	0.0036	0.000466	-6.02062	-0.21266	-1.25546			0.418859
1368581_at	0.00204	0.000215	-6.8142	0.63874	-1.25484	Sdc3	syndecan 3	0.419039
1379486_at	0.0106	0.00192	-4.74105	-1.76019	-1.25311			0.419544
1368584_a_at	0.00917	0.0016	-4.89591	-1.56061	-1.25303	Cplx2	complexin 2	0.419567
1393382_at	0.00185	0.000187	-6.96184	0.78886	-1.25004	RGD1566386	similar to Hypothetical protein A430033K04	0.420437
1391463_at	0.239	0.107	-1.83683	-5.97258	-1.24897	Ddx58	DEXD/H-box helicase 58	0.420748
1385974_at	0.0295	0.00695	-3.7269	-3.15212	-1.24888	LOC100909590///Pard6g	partitioning defective 6 homolog gamma-like///par-6 family cell polarity regulator gamma	0.420774
1377346_at	0.0183	0.00381	-4.18494	-2.50554	-1.24849	Ccdc149	coiled-coil domain containing 149	0.420888
1380883_at	0.00857	0.00147	-4.96795	-1.46895	-1.24826			0.420955
1368028_at	0.0918	0.029	-2.71621	-4.66008	-1.24816	Prph	peripherin	0.420984
1377267_at	0.00124	0.000106	-7.59871	1.4091	-1.24793	Magee1	MAGE family member E1	0.421052
1382987_at	0.157	0.0573	-2.25707	-5.35634	-1.24784			0.421078
1389748_at	0.000354	1.55e-05	-10.1336	3.50724	-1.24778			0.421094
1385773_at	0.000948	7.07e-05	-8.08637	1.85596	-1.24736	Zkscan1	zinc finger with KRAB and SCAN domains 1	0.42122
1372825_at	0.00234	0.000258	-6.61841	0.43577	-1.24547	Fnbp1	formin binding protein 1	0.421771
1372110_at	0.000416	2.02e-05	-9.75271	3.2245	-1.24508	Limch1	LIM and calponin homology domains 1	0.421886
1385924_at	0.000729	4.78e-05	-8.57841	2.28422	-1.24499			0.421911
1379952_at	0.0444	0.0116	-3.35414	-3.69782	-1.24474			0.421985
1397688_at	0.000263	9.64e-06	-10.8665	4.02406	-1.24157	Pcdh9	protocadherin 9	0.422911
1377646_at	0.109	0.0359	-2.57027	-4.88228	-1.24119			0.423023
1396301_x_at	0.0652	0.0187	-3.01535	-4.20579	-1.24098	Afmid	arylformamidase	0.423084
1388165_at	0.0182	0.0038	-4.18892	-2.50005	-1.24081	Arhgap39	Rho GTPase activating protein 39	0.423136
1378418_at	0.0225	0.00498	-3.97897	-2.79279	-1.24049	Tifab	TIFA inhibitor	0.423229
1377309_at	0.000458	2.38e-05	-9.51873	3.04567	-1.24			0.423371
1379277_at	0.000201	5.92e-06	-11.6644	4.54962	-1.23995			0.423388
1375528_at	0.182	0.0707	-2.11745	-5.56463	-1.23932	Pnpla8	patatin-like phospholipase domain containing 8	0.423571
1374308_at	0.0034	0.000431	-6.09866	-0.12547	-1.23924	Sec14l2	SEC14-like lipid binding 2	0.423597
1398368_at	0.0069	0.00111	-5.21708	-1.15771	-1.2386	Unc80	unc-80 homolog, NALCN activator	0.423783
1382967_at	0.00271	0.000319	-6.40118	0.20524	-1.23837	Adgrg2	adhesion G protein-coupled receptor G2	0.42385
1387407_at	0.000477	2.53e-05	-9.42927	2.97622	-1.23744	Nap1l3	nucleosome assembly protein 1-like 3	0.424124
1376808_at	0.00258	0.000298	-6.47145	0.28043	-1.23686			0.424295
1396098_at	0.206	0.0846	-1.99703	-5.74176	-1.23682	Acin1	apoptotic chromatin condensation inducer 1	0.424308
1385246_at	0.000799	5.47e-05	-8.40589	2.13653	-1.23681			0.42431
1368515_at	0.00344	0.000438	-6.08311	-0.14278	-1.23652	Epb41l3	erythrocyte membrane protein band 4.1-like 3	0.424394
1367789_at	0.00341	0.000432	-6.09535	-0.12916	-1.23553	Slc27a1	solute carrier family 27 member 1	0.424687
1391405_at	0.00083	5.74e-05	-8.34479	2.08359	-1.2347	Thsd7a	thrombospondin type 1 domain containing 7A	0.42493
1395806_at	0.000592	3.51e-05	-8.98294	2.62053	-1.23428	LOC102556780///LOC102556632///LOC100912726///LOC100909409///LOC690467///LOC689635///LOC689453///LOC688649///LOC686719///LOC685989///LOC685199///LOC683878///LOC679730///LOC501467///LOC501317	uncharacterized LOC102556780///disks large homolog 5-like///disks large homolog 5-like///disks large homolog 5-like///similar to RIKEN cDNA 5031410I06///similar to spermatogenesis associated glutamate (E)-rich protein 4d///hypothetical protein LOC689453///similar to spermatogenesis associated glutamate (E)-rich protein 4d///hypothetical protein LOC686719///hypothetical protein LOC685989///similar…	0.425055
1382130_at	0.00878	0.00152	-4.94185	-1.50208	-1.23413	Pcdh19	protocadherin 19	0.425099
1384942_at	0.0101	0.00181	-4.79266	-1.6933	-1.23407	Lrfn5	leucine rich repeat and fibronectin type III domain containing 5	0.425117
1395121_at	0.106	0.0348	-2.59205	-4.84914	-1.23378			0.425201
1390429_at	0.0016	0.000153	-7.18455	1.01071	-1.23346			0.425298
1385598_at	0.00287	0.000344	-6.32336	0.12126	-1.23303			0.425422
1395706_at	0.0108	0.00195	-4.72842	-1.77663	-1.23288	Lingo1	leucine rich repeat and Ig domain containing 1	0.425468
1390905_at	0.0014	0.000128	-7.38509	1.20586	-1.23259	Mast4	microtubule associated serine/threonine kinase family member 4	0.425554
1393806_at	0.0498	0.0133	-3.25397	-3.84701	-1.23236			0.42562
1376787_at	0.226	0.0971	-1.90492	-5.87524	-1.23156	Lingo2	leucine rich repeat and Ig domain containing 2	0.425856
1383830_a_at	4.9e-05	4.09e-07	-17.0738	7.35196	-1.23073	Osbpl1a	oxysterol binding protein-like 1A	0.426101
1369926_at	0.000315	1.3e-05	-10.399	3.69844	-1.23047	Gpx3	glutathione peroxidase 3	0.426178
1370546_at	0.0911	0.0287	-2.72318	-4.64946	-1.23013	Unc13c	unc-13 homolog C	0.42628
1389754_at	0.049	0.0131	-3.26705	-3.82747	-1.23003			0.426308
1377125_at	0.000646	4e-05	-8.81172	2.47986	-1.22974	Dnajc6	DnaJ heat shock protein family (Hsp40) member C6	0.426395
1395327_at	0.00767	0.00127	-5.09354	-1.31094	-1.22972			0.426399
1389180_at	0.00037	1.69e-05	-10.0134	3.41913	-1.22834	Phkb	phosphorylase kinase regulatory subunit beta	0.426808
1386794_at	0.00125	0.000108	-7.58105	1.39248	-1.22771	Fbxw7	F-box and WD repeat domain containing 7	0.426996
1375869_at	0.000525	2.95e-05	-9.22166	2.81271	-1.22751	Ulk1	unc-51 like autophagy activating kinase 1	0.427053
1376376_at	0.00303	0.00037	-6.2493	0.04064	-1.22726			0.427127
1390378_at	0.000909	6.65e-05	-8.16269	1.92382	-1.22712			0.42717
1396565_at	0.00114	9.36e-05	-7.74855	1.54888	-1.22674	RGD1565616	RGD1565616	0.427283
1370488_a_at	0.00483	0.000688	-5.64889	-0.63895	-1.22653	Ptprs	protein tyrosine phosphatase, receptor type, S	0.427344
1393686_at	0.00609	0.000937	-5.36479	-0.97734	-1.22644			0.42737
1368514_at	0.00023	7.63e-06	-11.2416	4.27569	-1.22589	Maob	monoamine oxidase B	0.427535
1371013_at	0.0133	0.00254	-4.50925	-2.06543	-1.22508	Gria1	glutamate ionotropic receptor AMPA type subunit 1	0.427774
1395384_at	0.0211	0.00457	-4.04454	-2.7007	-1.2246	Usp31	ubiquitin specific peptidase 31	0.427916
1367594_at	0.028	0.00652	-3.77414	-3.08415	-1.22423	Bgn	biglycan	0.428027
1377071_at	0.0124	0.00235	-4.57211	-1.98189	-1.224	Rsf1	remodeling and spacing factor 1	0.428094
1392982_at	0.000869	6.17e-05	-8.25403	2.00435	-1.22377			0.428163
1392575_at	0.000905	6.6e-05	-8.17181	1.9319	-1.22327	Zfp654	zinc finger protein 654	0.428311
1394894_at	0.0304	0.00723	-3.69817	-3.19361	-1.22296			0.428402
1382098_at	8.24e-05	1.16e-06	-14.7235	6.27235	-1.22261			0.428507
1379460_at	0.0676	0.0196	-2.98383	-4.25347	-1.22256	Sgip1	SH3-domain GRB2-like (endophilin) interacting protein 1	0.428523
1372706_at	0.00389	0.000518	-5.91864	-0.32779	-1.22211	Hexb	hexosaminidase subunit beta	0.428655
1378876_at	0.0193	0.00408	-4.13294	-2.5775	-1.22181			0.428746
1389310_at	0.00287	0.000344	-6.32453	0.12252	-1.22135	Slc2a13	solute carrier family 2 member 13	0.428882
1395365_at	0.0251	0.0057	-3.87518	-2.93972	-1.22101			0.428983
1393245_at	0.00079	5.38e-05	-8.42795	2.15556	-1.22087	Phyh	phytanoyl-CoA 2-hydroxylase	0.429023
1398214_at	0.0467	0.0124	-3.30843	-3.76579	-1.22074	Mapk8ip3	mitogen-activated protein kinase 8 interacting protein 3	0.429064
1371148_s_at	0.0108	0.00196	-4.72458	-1.78162	-1.22055	Ina	internexin neuronal intermediate filament protein, alpha	0.429119
1374825_at	0.0122	0.00231	-4.58871	-1.95992	-1.22049	Sez6l2	seizure related 6 homolog like 2	0.429136
1396957_at	0.268	0.139	-1.66428	-6.21308	-1.21993			0.429305
1381699_at	0.101	0.0326	-2.63634	-4.78171	-1.21907			0.429559
1382089_at	0.252	0.119	-1.76975	-6.0672	-1.21874			0.429659
1384069_at	0.000334	1.42e-05	-10.2681	3.60475	-1.21873	Lrp11	LDL receptor related protein 11	0.429662
1370058_at	0.0118	0.0022	-4.62889	-1.90692	-1.21785	Nefl	neurofilament, light polypeptide	0.429923
1395660_at	0.0112	0.00204	-4.68903	-1.82801	-1.2175			0.430026
1367845_at	0.00836	0.00142	-4.99489	-1.43487	-1.21738	Nefm	neurofilament, medium polypeptide	0.430063
1384907_at	0.0174	0.00359	-4.23356	-2.4386	-1.21718	Dach1	dachshund family transcription factor 1	0.430123
1392478_at	0.00653	0.00102	-5.28576	-1.07346	-1.21702	Rab6b	RAB6B, member RAS oncogene family	0.43017
1379405_at	0.00314	0.000387	-6.20369	-0.00935	-1.21529	Arhgap35	Rho GTPase activating protein 35	0.430686
1393015_at	0.0438	0.0114	-3.36755	-3.67793	-1.21525	RGD1310587	similar to hypothetical protein FLJ14146	0.430697
1377729_at	0.000833	5.77e-05	-8.33876	2.07836	-1.21506			0.430756
1379817_at	4.42e-05	3.13e-07	-17.7345	7.62529	-1.21467	Purg	purine-rich element binding protein G	0.430872
1398640_at	0.000125	2.65e-06	-13.0956	5.40778	-1.21448	Rab30	RAB30, member RAS oncogene family	0.430927
1389199_at	0.000235	7.88e-06	-11.1898	4.24143	-1.21419	RGD1309079	similar to Ab2-095	0.431016
1397373_at	0.0117	0.00218	-4.63409	-1.90008	-1.21363	Map7d2	MAP7 domain containing 2	0.431182
1385381_at	0.0209	0.00451	-4.05392	-2.68758	-1.21317			0.431319
1379103_at	0.0126	0.00239	-4.55842	-2.00004	-1.21312			0.431333
1389413_at	9e-05	1.41e-06	-14.325	6.07052	-1.21277	Evi2a	ecotropic viral integration site 2A	0.431438
1377394_at	0.0736	0.0219	-2.90806	-4.36832	-1.21253			0.431512
1383845_at	4.28e-05	2.99e-07	-17.8496	7.67171	-1.21232			0.431573
1384239_at	0.00261	0.000302	-6.45749	0.26555	-1.21212	Tbc1d8	TBC1 domain family, member 8	0.431633
1384515_at	0.00155	0.000146	-7.23356	1.0588	-1.21137	Hey2	hes-related family bHLH transcription factor with YRPW motif 2	0.431857
1387763_at	0.0163	0.00331	-4.29713	-2.35159	-1.21106	Rab27a	RAB27A, member RAS oncogene family	0.431951
1369035_a_at	0.0678	0.0197	-2.97974	-4.25967	-1.21104	Kcnj6	potassium voltage-gated channel subfamily J member 6	0.431957
1385492_at	0.00189	0.000192	-6.93325	0.75998	-1.21075	Neto1	neuropilin and tolloid like 1	0.432043
1397190_at	0.00457	0.000643	-5.71285	-0.5643	-1.21068			0.432065
1370024_at	0.00396	0.00053	-5.89599	-0.35356	-1.2104	Fabp7	fatty acid binding protein 7	0.432148
1377369_at	0.0648	0.0186	-3.02197	-4.19577	-1.20978	Cybrd1	cytochrome b reductase 1	0.432335
1374199_at	0.00181	0.000181	-6.99897	0.82623	-1.20913	Dip2a	disco-interacting protein 2 homolog A	0.432529
1376623_at	0.00591	0.000901	-5.40109	-0.93348	-1.20872	Tmem204	transmembrane protein 204	0.432651
1382131_at	0.00263	0.000306	-6.4431	0.25016	-1.20741			0.433045
1397259_at	0.202	0.082	-2.01805	-5.71105	-1.20722	Fam126b	family with sequence similarity 126, member B	0.433101
1381360_at	0.0598	0.0168	-3.09099	-4.0916	-1.20706			0.43315
1376138_at	0.00692	0.00111	-5.21422	-1.16124	-1.20684	Nhsl2	NHS-like 2	0.433217
1370815_at	0.0189	0.00396	-4.1552	-2.54665	-1.20643	Nefh	neurofilament, heavy polypeptide	0.433339
1393821_at	0.167	0.0628	-2.19693	-5.44637	-1.2063	Nkain3	Na+/K+ transporting ATPase interacting 3	0.433379
1397596_at	0.000284	1.08e-05	-10.6867	3.90042	-1.20604	Trim2	tripartite motif-containing 2	0.433457
1374061_at	0.00118	9.85e-05	-7.68801	1.49268	-1.20419	Cd302	CD302 molecule	0.434012
1367857_at	0.000492	2.65e-05	-9.36692	2.92746	-1.20372	Fads1	fatty acid desaturase 1	0.434154
1377407_at	0.0331	0.00805	-3.61806	-3.30979	-1.20366	Acsm5	acyl-CoA synthetase medium-chain family member 5	0.434174
1370444_at	0.0202	0.00432	-4.08741	-2.64082	-1.20237	Cacna1b	calcium voltage-gated channel subunit alpha1 B	0.43456
1368104_at	0.00146	0.000136	-7.32022	1.14321	-1.20153	Tspan2	tetraspanin 2	0.434813
1373952_at	8.03e-05	1.12e-06	-14.8143	6.31754	-1.20133	Prkag2	protein kinase AMP-activated non-catalytic subunit gamma 2	0.434875
1391912_at	0.148	0.0531	-2.30847	-5.27905	-1.20076	Ube2b	ubiquitin-conjugating enzyme E2B	0.435047
1376024_at	0.00667	0.00106	-5.25676	-1.10895	-1.2007	Stim1	stromal interaction molecule 1	0.435064
1395430_at	0.0369	0.00922	-3.51943	-3.4539	-1.20017			0.435224
1380811_at	0.00122	0.000104	-7.62786	1.43647	-1.20002	Ptpn4	protein tyrosine phosphatase, non-receptor type 4	0.435271
1388471_at	0.000934	6.93e-05	-8.11187	1.87869	-1.19962	Tcp11l2	t-complex 11 like 2	0.43539
1390172_at	0.00567	0.000856	-5.44747	-0.87771	-1.19943	Dhtkd1	dehydrogenase E1 and transketolase domain containing 1	0.435447
1373580_at	0.000421	2.05e-05	-9.72725	3.20524	-1.19926	Miga1	mitoguardin 1	0.4355
1373578_at	0.000461	2.4e-05	-9.50419	3.03442	-1.19912	Trim2	tripartite motif-containing 2	0.435542
1379274_at	0.235	0.104	-1.85931	-5.94058	-1.19866			0.435679
1372162_at	0.000986	7.54e-05	-8.00748	1.78522	-1.19843	Acss1	acyl-CoA synthetase short-chain family member 1	0.43575
1385638_at	0.00401	0.000539	-5.88039	-0.37133	-1.19753			0.436023
1380174_at	0.000911	6.67e-05	-8.15855	1.92016	-1.19751			0.436027
1385188_at	0.0958	0.0305	-2.68078	-4.71404	-1.19719	RGD1309188	similar to hypothetical protein BC011833	0.436124
1395251_at	0.00343	0.000435	-6.0895	-0.13567	-1.19635	Osbpl1a	oxysterol binding protein-like 1A	0.436378
1386685_at	0.0263	0.00604	-3.83248	-3.0006	-1.19609	Sacs	sacsin molecular chaperone	0.436455
1368038_at	5.91e-05	6.08e-07	-16.1462	6.94704	-1.19577	Synj2bp	synaptojanin 2 binding protein	0.436555
1391581_at	0.00609	0.000938	-5.36431	-0.97792	-1.19489			0.436818
1379512_at	0.0417	0.0107	-3.41289	-3.61079	-1.19459			0.436912
1387435_at	0.0191	0.00402	-4.14339	-2.563	-1.1944	St8sia3	ST8 alpha-N-acetyl-neuraminide alpha-2,8-sialyltransferase 3	0.436968
1370691_a_at	0.00091	6.66e-05	-8.16066	1.92203	-1.19385	Thra	thyroid hormone receptor alpha	0.437135
1380872_at	0.00047	2.47e-05	-9.46297	3.00246	-1.19358			0.437216
1388799_at	0.000222	7.09e-06	-11.3636	4.35574	-1.1935	Klhl7	kelch-like family member 7	0.43724
1376194_at	0.000705	4.55e-05	-8.64135	2.33745	-1.19111	LOC100912727	uncharacterized LOC100912727	0.437966
1374383_at	0.0503	0.0135	-3.24519	-3.86013	-1.19095			0.438013
1367918_at	0.000153	3.69e-06	-12.4869	5.05508	-1.19087	Fez1	fasciculation and elongation protein zeta 1	0.43804
1384277_at	0.00385	0.00051	-5.93335	-0.3111	-1.19069	Plekhh1	pleckstrin homology, MyTH4 and FERM domain containing H1	0.438093
1379272_at	0.135	0.0473	-2.38553	-5.16271	-1.19066	Paip1	poly(A) binding protein interacting protein 1	0.438103
1398345_at	0.0796	0.0242	-2.83958	-4.47234	-1.19052			0.438144
1368089_at	0.00172	0.000169	-7.07654	0.90381	-1.19049	Pde2a	phosphodiesterase 2A	0.438154
1392715_at	0.0794	0.0241	-2.84228	-4.46824	-1.18936	Ppargc1b	PPARG coactivator 1 beta	0.438496
1381477_at	0.0462	0.0122	-3.31831	-3.75108	-1.18863			0.438719
1382081_at	0.132	0.0458	-2.40751	-5.12944	-1.18802	Scara3	scavenger receptor class A, member 3	0.438905
1376967_at	0.000776	5.24e-05	-8.46014	2.18325	-1.18784			0.438958
1383309_at	0.000299	1.18e-05	-10.5458	3.80218	-1.18714	St3gal6	ST3 beta-galactoside alpha-2,3-sialyltransferase 6	0.439174
1385643_at	0.002	0.000208	-6.84802	0.67334	-1.18661			0.439333
1385409_at	0.00612	0.000943	-5.35952	-0.98372	-1.1866	Myo10	myosin X	0.439337
1395000_at	0.0274	0.00636	-3.79348	-3.0564	-1.18648			0.439375
1384444_at	0.0902	0.0284	-2.73088	-4.63773	-1.1863	Tmem91	transmembrane protein 91	0.439429
1387406_at	0.0925	0.0292	-2.71051	-4.66876	-1.18549	RGD1561897///Uhmk1	similar to Serine/threonine-protein kinase Kist (Kinase interacting with stathmin)///U2AF homology motif (UHM) kinase 1	0.439675
1372617_at	0.00172	0.000169	-7.07279	0.90007	-1.18538	Btbd2	BTB domain containing 2	0.43971
1370896_a_at	0.171	0.0645	-2.17829	-5.47419	-1.18501	Myh11	myosin heavy chain 11	0.439821
1387182_at	0.000535	3.03e-05	-9.1833	2.78214	-1.18427	Gpr37	G protein-coupled receptor 37	0.440048
1393613_at	6.77e-05	7.82e-07	-15.5807	6.68708	-1.18327	Zfp462	zinc finger protein 462	0.440353
1375484_at	0.000254	9.11e-06	-10.9569	4.08549	-1.18303	Cpeb3	cytoplasmic polyadenylation element binding protein 3	0.440426
1387368_at	0.0283	0.00661	-3.76426	-3.09834	-1.18282	Mras	muscle RAS oncogene homolog	0.440488
1373326_at	0.00237	0.000263	-6.60047	0.41694	-1.18258	Slc4a10	solute carrier family 4 member 10	0.440563
1380107_a_at	0.0173	0.00357	-4.23628	-2.43486	-1.18237	Nat8l	N-acetyltransferase 8-like	0.440626
1389114_at	0.0197	0.0042	-4.11074	-2.60834	-1.18214	Thnsl2	threonine synthase-like 2	0.440697
1388730_at	0.00221	0.000238	-6.70286	0.52386	-1.18152	Cdc42ep4	CDC42 effector protein 4	0.440886
1388152_at	0.00055	3.17e-05	-9.12309	2.73391	-1.18135	Map2	microtubule-associated protein 2	0.440938
1370011_at	0.000704	4.53e-05	-8.64744	2.34259	-1.18068	Ak1	adenylate kinase 1	0.441142
1397364_at	0.085	0.0263	-2.78256	-4.55907	-1.1806			0.441167
1374060_at	0.00426	0.000583	-5.8049	-0.45782	-1.18009			0.441323
1390235_at	0.000436	2.18e-05	-9.64044	3.13919	-1.17938			0.44154
1372736_at	2.84e-05	1e-07	-20.809	8.75503	-1.17924	Agl	amylo-alpha-1, 6-glucosidase, 4-alpha-glucanotransferase	0.441583
1398354_at	0.00857	0.00147	-4.9677	-1.46927	-1.17836	Ctnnal1	catenin alpha-like 1	0.441854
1368958_at	0.00065	4.03e-05	-8.79948	2.46971	-1.17819	Pacsin1	protein kinase C and casein kinase substrate in neurons 1	0.441907
1376736_at	0.0314	0.00753	-3.66732	-3.23825	-1.17786			0.442008
1384610_at	0.0092	0.00161	-4.89239	-1.56512	-1.17778	Fam63b	family with sequence similarity 63, member B	0.442031
1388305_at	0.00161	0.000154	-7.17314	0.99948	-1.17772	Araf	A-Raf proto-oncogene, serine/threonine kinase	0.442049
1382182_at	0.000577	3.38e-05	-9.03635	2.66392	-1.17685	Hoxc9	homeobox C9	0.442315
1368429_at	0.00616	0.000952	-5.35093	-0.99414	-1.17645	Taf9b	TATA-box binding protein associated factor 9b	0.442438
1370307_at	0.0371	0.00926	-3.51582	-3.45919	-1.17625	Agrn	agrin	0.442501
1382524_at	0.00607	0.000934	-5.36811	-0.97332	-1.17615	Zbtb20	zinc finger and BTB domain containing 20	0.442531
1370059_at	0.00287	0.000345	-6.32114	0.11885	-1.1754	Nefl	neurofilament, light polypeptide	0.442762
1367771_at	0.00134	0.00012	-7.4559	1.27376	-1.17518	Tsc22d3	TSC22 domain family, member 3	0.44283
1386660_at	0.00874	0.00151	-4.94683	-1.49575	-1.17495	Gng2	G protein subunit gamma 2	0.4429
1374106_at	0.00234	0.000257	-6.62177	0.43929	-1.17435			0.443084
1387852_at	0.00749	0.00123	-5.12342	-1.27369	-1.17379	Thrsp	thyroid hormone responsive	0.443255
1374190_at	0.0183	0.00381	-4.18583	-2.50431	-1.17344	Clybl	citrate lyase beta like	0.443364
1384818_at	0.000342	1.48e-05	-10.2097	3.56251	-1.17329	Mylk	myosin light chain kinase	0.443409
1387893_at	0.102	0.033	-2.62822	-4.79407	-1.17223	C1s	complement component 1, s subcomponent	0.443735
1375183_at	0.0016	0.000153	-7.18314	1.00932	-1.17175	Id4	inhibitor of DNA binding 4, HLH protein	0.443883
1392944_at	0.0128	0.00242	-4.54853	-2.01317	-1.17123	Tln2	talin 2	0.444041
1392928_at	0.0173	0.00358	-4.23591	-2.43538	-1.17109	L3hypdh	trans-L-3-hydroxyproline dehydratase	0.444087
1393901_at	0.00162	0.000156	-7.16101	0.98752	-1.17101	Runx1t1	RUNX1 translocation partner 1	0.44411
1398658_at	0.00196	0.000203	-6.87573	0.70161	-1.17058			0.444243
1397579_x_at	0.00061	3.69e-05	-8.91851	2.56788	-1.17031	Apc2	APC2, WNT signaling pathway regulator	0.444326
1395556_at	0.138	0.0488	-2.36536	-5.19321	-1.16936	Fam168b	family with sequence similarity 168, member B	0.44462
1394649_at	0.000669	4.2e-05	-8.74739	2.42637	-1.16905	Ankrd6	ankyrin repeat domain 6	0.444714
1393937_at	0.00103	8.01e-05	-7.93457	1.71933	-1.16863			0.444842
1376654_at	0.0032	0.000396	-6.18149	-0.03378	-1.16856	Plcxd3	phosphatidylinositol-specific phospholipase C, X domain containing 3	0.444866
1382785_at	0.00768	0.00128	-5.09097	-1.31415	-1.16808	Kif1a	kinesin family member 1A	0.445012
1377934_at	0.00146	0.000136	-7.31975	1.14275	-1.16761	Exph5	exophilin 5	0.445158
1378462_at	0.00413	0.00056	-5.84381	-0.41314	-1.1676	Mtap	methylthioadenosine phosphorylase	0.445162
1370535_at	0.00693	0.00111	-5.21311	-1.16261	-1.167	Myt1l	myelin transcription factor 1-like	0.445347
1390981_at	0.00167	0.000162	-7.12047	0.94744	-1.16695	Eny2	ENY2, transcription and export complex 2 subunit	0.445361
1386962_at	0.00493	0.000708	-5.62244	-0.67	-1.16691	Plcb4	phospholipase C, beta 4	0.445374
1398659_at	0.0228	0.00505	-3.96791	-2.80837	-1.16592	Vwc2	von Willebrand factor C domain containing 2	0.44568
1374386_at	0.00263	0.000305	-6.44429	0.25144	-1.16528			0.445877
1394474_at	0.00887	0.00154	-4.92985	-1.51734	-1.16506			0.445945
1377682_at	0.0113	0.00208	-4.67404	-1.84763	-1.16479			0.446028
1382132_at	0.00268	0.000313	-6.41981	0.22523	-1.16405			0.446259
1370672_a_at	0.00174	0.000173	-7.05061	0.87795	-1.16349	Dnm3	dynamin 3	0.44643
1368449_at	0.00613	0.000945	-5.35732	-0.98639	-1.16321	Adap1	ArfGAP with dual PH domains 1	0.446518
1379545_at	0.00429	0.00059	-5.7941	-0.47025	-1.16292			0.446607
1385215_at	0.0262	0.00601	-3.83629	-2.99516	-1.16232	Runx1t1	RUNX1 translocation partner 1	0.446795
1389522_at	0.00383	0.000506	-5.94184	-0.30149	-1.1623	Plekha6	pleckstrin homology domain containing A6	0.446801
1368853_at	0.00251	0.000285	-6.51419	0.32588	-1.16213	Vsnl1	visinin-like 1	0.446853
1377001_at	0.000801	5.49e-05	-8.40233	2.13346	-1.1621	Nrcam	neuronal cell adhesion molecule	0.446861
1385787_at	0.00188	0.000191	-6.94041	0.76722	-1.1619	rnf141	ring finger protein 141	0.446923
1396899_at	0.145	0.0517	-2.32682	-5.25139	-1.16158			0.447022
1391434_at	0.00131	0.000116	-7.49603	1.312	-1.16134	Rab3a	RAB3A, member RAS oncogene family	0.447098
1394590_at	0.0341	0.00835	-3.59145	-3.34856	-1.1612	Nkiras1	NFKB inhibitor interacting Ras-like 1	0.44714
1373618_at	0.0159	0.0032	-4.32269	-2.31677	-1.15987	Crebl2	cAMP responsive element binding protein-like 2	0.447554
1374287_at	0.00437	0.000604	-5.77139	-0.49645	-1.15983	Pald1	phosphatase domain containing, paladin 1	0.447565
1387344_at	3.76e-05	1.96e-07	-18.9403	8.0946	-1.15912	Aldh6a1	aldehyde dehydrogenase 6 family, member A1	0.447786
1374780_at	0.358	0.291	-1.13973	-6.86557	-1.15894	Zfp422	zinc finger protein 422	0.447842
1394833_at	0.00232	0.000255	-6.63115	0.44911	-1.15888	Chn2	chimerin 2	0.447861
1389781_at	0.00518	0.000756	-5.56116	-0.74226	-1.15878	Elmod1	ELMO domain containing 1	0.447892
1382897_at	0.00107	8.45e-05	-7.87016	1.6607	-1.15866	Mbd5	methyl-CpG binding domain protein 5	0.447929
1379867_at	0.0148	0.00291	-4.39918	-2.21311	-1.15852	Adgra1	adhesion G protein-coupled receptor A1	0.44797
1373774_at	0.00559	0.000839	-5.46567	-0.85591	-1.15843	Rit2	Ras-like without CAAX 2	0.448
1369518_at	0.00366	0.000477	-5.99826	-0.23779	-1.15796	Pik3r3	phosphoinositide-3-kinase regulatory subunit 3	0.448146
1370342_at	0.0157	0.00314	-4.34008	-2.29312	-1.15736	Kcnk2	potassium two pore domain channel subfamily K member 2	0.448331
1397511_at	0.00351	0.000448	-6.05948	-0.16915	-1.15685	Ttyh1	tweety family member 1	0.448491
1380675_s_at	0.14	0.0494	-2.35665	-5.20637	-1.15634	Car11	carbonic anhydrase 11	0.44865
1385213_at	0.251	0.118	-1.77628	-6.05805	-1.15533	Epsti1	epithelial stromal interaction 1 (breast)	0.448963
1384772_at	0.00155	0.000146	-7.23479	1.06001	-1.1553	Prkacb	protein kinase cAMP-activated catalytic subunit beta	0.448974
1389586_at	0.000171	4.44e-06	-12.1565	4.85618	-1.15489			0.4491
1369155_at	0.0662	0.0191	-3.0028	-4.22477	-1.15479	Cntn4	contactin 4	0.449132
1392927_at	0.0062	0.000961	-5.34264	-1.00419	-1.1542	Paqr4	progestin and adipoQ receptor family member 4	0.449315
1380376_at	0.0221	0.00487	-3.99553	-2.76946	-1.15386	Osbpl6	oxysterol binding protein-like 6	0.44942
1393152_at	0.00108	8.66e-05	-7.84145	1.63442	-1.15383	Mut	methylmalonyl CoA mutase	0.44943
1372118_at	0.00322	0.000401	-6.17044	-0.04596	-1.15365	Nsg2	neuron specific gene family member 2	0.449486
1378856_at	0.000523	2.93e-05	-9.22844	2.81811	-1.15355	Tceal6///Tceal3	transcription elongation factor A (SII)-like 6///transcription elongation factor A like 3	0.449517
1398357_at	0.0108	0.00196	-4.72313	-1.78351	-1.15277	Cplx1	complexin 1	0.449761
1367813_at	0.00295	0.000358	-6.28365	0.07811	-1.15254	Ppp1r14a	protein phosphatase 1, regulatory (inhibitor) subunit 14A	0.449831
1389774_at	0.00229	0.000252	-6.64573	0.46435	-1.15251	Zfp612	zinc finger protein 612	0.449842
1392286_at	0.00367	0.000478	-5.99623	-0.24008	-1.15236			0.449887
1389908_at	0.000934	6.92e-05	-8.11239	1.87915	-1.15229			0.44991
1392880_at	0.0105	0.00188	-4.76035	-1.73513	-1.15215	Rab37	RAB37, member RAS oncogene family	0.449954
1391330_at	0.000103	1.86e-06	-13.775	5.78177	-1.15191			0.450029
1385046_at	0.00197	0.000204	-6.87072	0.6965	-1.15127	Nxpe3	neurexophilin and PC-esterase domain family, member 3	0.45023
1375049_at	0.0141	0.00276	-4.44327	-2.15375	-1.1505	Ltbp3	latent transforming growth factor beta binding protein 3	0.450469
1391672_at	0.0263	0.00602	-3.83394	-2.99851	-1.15033			0.450521
1395389_at	0.000418	2.03e-05	-9.74065	3.21538	-1.15031	LOC102557177	uncharacterized LOC102557177	0.450527
1368138_at	4.31e-05	3.02e-07	-17.8224	7.66077	-1.14985	Mapt	microtubule-associated protein tau	0.450672
1383066_at	0.000909	6.65e-05	-8.16232	1.9235	-1.14811			0.451217
1368025_at	0.0118	0.00219	-4.63116	-1.90393	-1.14803	Ddit4	DNA-damage-inducible transcript 4	0.451241
1372140_at	0.0149	0.00295	-4.38975	-2.22585	-1.14714	Ccdc28a	coiled-coil domain containing 28A	0.45152
1379468_at	0.102	0.0329	-2.62974	-4.79175	-1.14677			0.451635
1392582_at	0.00754	0.00124	-5.11515	-1.28398	-1.14664			0.451676
1390872_at	0.00111	8.93e-05	-7.80488	1.60086	-1.1464			0.45175
1399040_at	0.00612	0.000943	-5.35907	-0.98427	-1.14551	Gba2	glucosidase beta 2	0.452029
1367562_at	0.000965	7.28e-05	-8.05014	1.82355	-1.14549	Sparc	secreted protein acidic and cysteine rich	0.452035
1393939_at	0.00543	0.000807	-5.50148	-0.81314	-1.14464	rnf141	ring finger protein 141	0.452304
1379200_at	0.022	0.00483	-4.00121	-2.76148	-1.14423	Dzip3	DAZ interacting zinc finger protein 3	0.45243
1370178_at	0.00491	0.000705	-5.62613	-0.66566	-1.14385	Cacnb2	calcium voltage-gated channel auxiliary subunit beta 2	0.452549
1372190_at	0.000429	2.12e-05	-9.68383	3.17227	-1.14384	Aqp4	aquaporin 4	0.452553
1387529_a_at	0.000965	7.28e-05	-8.05104	1.82435	-1.14322	Tagln3	transgelin 3	0.452749
1390835_at	0.278	0.152	-1.60046	-6.29942	-1.14298	Slc47a1	solute carrier family 47 member 1	0.452824
1385692_at	0.106	0.0348	-2.5931	-4.84754	-1.14286	Slc10a4	solute carrier family 10, member 4	0.452861
1393673_at	0.0177	0.00368	-4.21392	-2.46559	-1.14286	Sdr39u1	short chain dehydrogenase/reductase family 39U, member 1	0.452862
1386296_at	0.000509	2.8e-05	-9.28993	2.86685	-1.14268	2018-09-08	septin 8	0.452917
1397536_at	0.000875	6.26e-05	-8.2377	1.99001	-1.14196	Camta1	calmodulin binding transcription activator 1	0.453142
1398866_at	0.00138	0.000126	-7.40688	1.22681	-1.14195	Magi3	membrane associated guanylate kinase, WW and PDZ domain containing 3	0.453147
1371541_at	0.000859	6.07e-05	-8.27521	2.02291	-1.14194	Mylk	myosin light chain kinase	0.45315
1381470_at	0.00543	0.000807	-5.50129	-0.81337	-1.14187			0.453171
1388274_at	0.000603	3.63e-05	-8.9375	2.58344	-1.14151	Bmyc	brain expressed myelocytomatosis oncogene	0.453284
1391342_at	0.0105	0.00189	-4.7533	-1.74428	-1.14113			0.453403
1369371_a_at	0.0767	0.023	-2.87266	-4.42207	-1.14051	Gabbr1	gamma-aminobutyric acid type B receptor subunit 1	0.4536
1368951_at	0.0502	0.0135	-3.24573	-3.85932	-1.14032	Grin2d	glutamate ionotropic receptor NMDA type subunit 2D	0.45366
1387127_at	0.000533	3.01e-05	-9.18959	2.78716	-1.14018	Atrn	attractin	0.453704
1367517_at	0.000427	2.1e-05	-9.69593	3.18147	-1.13949			0.453921
1391879_at	0.0991	0.0318	-2.65266	-4.75686	-1.13888			0.454112
1378738_at	0.008	0.00135	-5.04357	-1.37354	-1.13853	Kcnab1	potassium voltage-gated channel subfamily A member regulatory beta subunit 1	0.454223
1383759_at	0.013	0.00249	-4.52743	-2.04121	-1.1376	Agtpbp1	ATP/GTP binding protein 1	0.454514
1389448_at	0.000222	7.09e-06	-11.362	4.35474	-1.13753	2018-09-04	septin 4	0.454537
1371794_at	8.5e-05	1.25e-06	-14.5785	6.1996	-1.1368	Zfp106	zinc finger protein 106	0.454766
1393443_a_at	0.0157	0.00316	-4.33504	-2.29998	-1.13633	Emc9	ER membrane protein complex subunit 9	0.454917
1383212_at	0.000152	3.65e-06	-12.5064	5.06666	-1.13586	Psd3	pleckstrin and Sec7 domain containing 3	0.455064
1371360_at	0.000341	1.47e-05	-10.2187	3.56903	-1.13567	Ndrg1	N-myc downstream regulated 1	0.455124
1388057_a_at	0.011	0.00199	-4.71082	-1.79956	-1.13523	Dlgap1	DLG associated protein 1	0.455262
1370158_at	0.00113	9.16e-05	-7.77358	1.57202	-1.13451	Myh10	myosin, heavy chain 10, non-muscle	0.45549
1382451_at	0.125	0.0427	-2.45374	-5.05937	-1.13426	Hebp2	heme binding protein 2	0.455569
1384780_at	0.303	0.195	-1.42884	-6.52316	-1.13403	Cpne4	copine 4	0.455643
1390566_a_at	0.00423	0.000577	-5.81598	-0.44507	-1.1334	Ckmt1b	creatine kinase, mitochondrial 1B	0.455839
1368081_at	0.00104	8.17e-05	-7.91114	1.69805	-1.13326	Abca2	ATP binding cassette subfamily A member 2	0.455886
1392724_at	0.109	0.036	-2.56997	-4.88274	-1.13211	Tom1l2	target of myb1 like 2 membrane trafficking protein	0.456248
1374243_at	0.000293	1.14e-05	-10.598	3.83875	-1.13191			0.45631
1391976_at	0.0407	0.0104	-3.43506	-3.57804	-1.13185	Six4	SIX homeobox 4	0.456331
1392383_at	0.0409	0.0104	-3.43053	-3.58473	-1.13163			0.4564
1379126_at	0.0794	0.0241	-2.84237	-4.4681	-1.13132	Prune2	prune homolog 2	0.456497
1392735_at	0.0364	0.00905	-3.53235	-3.43496	-1.1313			0.456504
1383950_at	0.0246	0.00556	-3.89417	-2.91274	-1.1309			0.456631
1389806_at	0.0595	0.0167	-3.09587	-4.08424	-1.13075	Stard10	StAR-related lipid transfer domain containing 10	0.456677
1387171_at	0.00039	1.8e-05	-9.91371	3.34525	-1.13073	Gria2	glutamate ionotropic receptor AMPA type subunit 2	0.456684
1392406_at	0.0251	0.00571	-3.87497	-2.94003	-1.1307	Ipp	intracisternal A particle-promoted polypeptide	0.456695
1367864_at	0.000233	7.76e-06	-11.2143	4.25765	-1.13055	Pfkm	phosphofructokinase, muscle	0.456743
1372443_at	0.00213	0.000227	-6.75225	0.57499	-1.12879	Lrp11	LDL receptor related protein 11	0.457298
1381206_at	0.00511	0.000742	-5.57892	-0.72127	-1.12838	Plcxd2	phosphatidylinositol-specific phospholipase C, X domain containing 2	0.457428
1391764_at	0.0124	0.00235	-4.57499	-1.97807	-1.12834			0.457442
1382787_at	0.0119	0.00221	-4.62286	-1.91486	-1.12819	Kif5a	kinesin family member 5A	0.45749
1374929_at	0.00395	0.000528	-5.89986	-0.34915	-1.12811	Ccdc126	coiled-coil domain containing 126	0.457515
1379027_at	0.00126	0.000109	-7.57375	1.3856	-1.12791	Wwc1	WW and C2 domain containing 1	0.457579
1374466_at	0.000509	2.8e-05	-9.29072	2.86747	-1.12746			0.45772
1369903_at	0.0193	0.00407	-4.13364	-2.57652	-1.12703	Gabrb3	gamma-aminobutyric acid type A receptor beta 3 subunit	0.457857
1377580_at	0.0056	0.000842	-5.46213	-0.86015	-1.12687	Tcaf1	TRPM8 channel-associated factor 1	0.457907
1395076_at	0.0994	0.0319	-2.65003	-4.76086	-1.1266	Runx1t1	RUNX1 translocation partner 1	0.457993
1390727_at	0.0039	0.00052	-5.91539	-0.33149	-1.12657			0.458004
1368256_at	0.0127	0.00242	-4.55007	-2.01112	-1.12617	Serpini1	serpin family I member 1	0.458129
1390945_at	0.0226	0.00499	-3.97625	-2.79661	-1.12604	Zfp292	zinc finger protein 292	0.458173
1370543_at	0.0151	0.00299	-4.37738	-2.24257	-1.12591	Ogt	O-linked N-acetylglucosamine (GlcNAc) transferase	0.458211
1383580_at	0.0113	0.00208	-4.6735	-1.84834	-1.1255	Rnf157	ring finger protein 157	0.458344
1379075_at	0.00158	0.00015	-7.20267	1.02852	-1.12465	Mboat2	membrane bound O-acyltransferase domain containing 2	0.458613
1388926_at	7.94e-05	1.07e-06	-14.9105	6.36507	-1.12462	Enpp5	ectonucleotide pyrophosphatase/phosphodiesterase 5	0.458623
1372755_at	0.00645	0.00101	-5.29985	-1.05626	-1.12449	Mal2	mal, T-cell differentiation protein 2	0.458663
1372515_at	0.000848	5.95e-05	-8.30025	2.0448	-1.12318	Tenm4	teneurin transmembrane protein 4	0.459082
1393307_at	0.0219	0.0048	-4.00676	-2.75368	-1.12232	Phactr3	phosphatase and actin regulator 3	0.459356
1379754_at	0.0669	0.0194	-2.99201	-4.24109	-1.122	Stau2	staufen double-stranded RNA binding protein 2	0.459456
1390334_at	0.0188	0.00395	-4.15836	-2.54227	-1.12185	Fam57b	family with sequence similarity 57, member B	0.459504
1371517_at	0.105	0.0345	-2.5983	-4.83963	-1.12164	Grb10	growth factor receptor bound protein 10	0.459571
1368114_at	0.000915	6.71e-05	-8.15029	1.91284	-1.11913	Fgf13	fibroblast growth factor 13	0.460372
1385252_at	0.132	0.046	-2.40523	-5.1329	-1.11888	Trim34	tripartite motif-containing 34	0.460451
1369651_at	0.00112	9.07e-05	-7.7864	1.58384	-1.11885	Thy1	Thy-1 cell surface antigen	0.46046
1385302_at	0.0109	0.00198	-4.71454	-1.79471	-1.11885	Gdpd1	glycerophosphodiester phosphodiesterase domain containing 1	0.460461
1390153_at	0.000273	1.02e-05	-10.77	3.95798	-1.1186	Prune2	prune homolog 2	0.460541
1398447_at	9.66e-05	1.62e-06	-14.0438	5.92438	-1.11799	Igip	IgA-inducing protein	0.460735
1368696_at	0.0131	0.00251	-4.51872	-2.05281	-1.11789	Fxyd7	FXYD domain-containing ion transport regulator 7	0.460766
1387146_a_at	0.00365	0.000475	-6.00357	-0.23183	-1.1176	Ednrb	endothelin receptor type B	0.46086
1392883_at	0.00303	0.000371	-6.24627	0.03733	-1.11692	Limch1	LIM and calponin homology domains 1	0.461078
1373577_at	0.126	0.043	-2.44998	-5.06508	-1.11634	Nrp1	neuropilin 1	0.461263
1387005_at	0.00107	8.44e-05	-7.87168	1.66208	-1.11607	Ctss	cathepsin S	0.46135
1374370_at	0.00762	0.00126	-5.10102	-1.3016	-1.11592			0.461398
1371672_at	0.00221	0.000238	-6.70377	0.52481	-1.1157	Cbx7	chromobox 7	0.461468
1374271_at	0.00256	0.000294	-6.48225	0.29194	-1.11322			0.46226
1380563_at	0.0294	0.00692	-3.72969	-3.1481	-1.1126	Sspn	sarcospan	0.462459
1393230_s_at	0.0135	0.00261	-4.48797	-2.09385	-1.11149	Vwa8	von Willebrand factor A domain containing 8	0.462816
1396479_at	0.117	0.0394	-2.50802	-4.97694	-1.11125	Zbtb7c	zinc finger and BTB domain containing 7C	0.462892
1392588_at	0.000439	2.21e-05	-9.62495	3.12735	-1.11049	Dstyk	dual serine/threonine and tyrosine protein kinase	0.463136
1375622_at	0.0946	0.0301	-2.69029	-4.69954	-1.10997	Rbsn	rabenosyn, RAB effector	0.463304
1388600_at	0.00278	0.000329	-6.36985	0.17151	-1.10977	Paqr8	progestin and adipoQ receptor family member 8	0.463367
1386551_at	0.0445	0.0116	-3.35211	-3.70084	-1.10949	Whsc1	Wolf-Hirschhorn syndrome candidate 1	0.463458
1383399_at	0.01	0.00178	-4.80272	-1.68029	-1.10944			0.463473
1394681_at	0.173	0.0658	-2.16521	-5.49368	-1.10835	Akr1cl	aldo-keto reductase family 1, member C-like	0.463823
1393171_at	0.00132	0.000117	-7.49002	1.30629	-1.10819	Tmem47	transmembrane protein 47	0.463875
1378421_at	0.0222	0.0049	-3.99141	-2.77526	-1.10812	LOC100910996	uncharacterized LOC100910996	0.463899
1387350_at	0.00416	0.000566	-5.83357	-0.42488	-1.10793	Tmf1	TATA element modulatory factor 1	0.463959
1390155_at	0.000649	4.03e-05	-8.80125	2.47117	-1.10749	Abhd6	abhydrolase domain containing 6	0.464101
1391444_at	9.66e-05	1.64e-06	-14.0231	5.91352	-1.10713			0.464216
1387703_a_at	0.00836	0.00142	-4.99497	-1.43477	-1.10665	Usp2	ubiquitin specific peptidase 2	0.46437
1390437_at	0.000776	5.24e-05	-8.46195	2.18481	-1.10657	Sema5a	semaphorin 5A	0.464396
1369135_at	0.00513	0.000746	-5.57311	-0.72814	-1.10611	Syt11	synaptotagmin 11	0.464545
1372613_at	0.000179	4.78e-06	-12.0293	4.77816	-1.10608	Bdh2	3-hydroxybutyrate dehydrogenase, type 2	0.464554
1390493_at	0.00801	0.00135	-5.04219	-1.37528	-1.10604			0.464567
1384505_at	0.0523	0.0142	-3.21003	-3.91274	-1.10602			0.464573
1387046_at	0.00225	0.000244	-6.67827	0.4983	-1.10602	Ift172	intraflagellar transport 172	0.464574
1377917_at	0.0356	0.00879	-3.55386	-3.40347	-1.10585			0.46463
1393387_at	0.101	0.0324	-2.63963	-4.7767	-1.10514	Endou	endonuclease, poly(U)-specific	0.464857
1379626_at	0.0162	0.00326	-4.30806	-2.33669	-1.10498	Satb1	SATB homeobox 1	0.464909
1376575_at	0.00118	9.84e-05	-7.68917	1.49375	-1.10441	Twsg1	twisted gastrulation BMP signaling modulator 1	0.465092
1368699_at	0.00133	0.000119	-7.46694	1.28429	-1.10365	Dscam	DS cell adhesion molecule	0.465338
1389398_at	0.211	0.0871	-1.97755	-5.77016	-1.10317	Ank1	ankyrin 1	0.465493
1370625_at	2.89e-05	1.04e-07	-20.6965	8.71736	-1.10289	Faim2	Fas apoptotic inhibitory molecule 2	0.465583
1397850_at	0.0238	0.00533	-3.92649	-2.8669	-1.10251			0.465707
1380854_at	0.00147	0.000136	-7.31405	1.13722	-1.10231	Vegfb	vascular endothelial growth factor B	0.465771
1382691_at	0.0457	0.012	-3.32698	-3.73818	-1.10186	Sf3b1	splicing factor 3b, subunit 1	0.465915
1382032_at	0.000116	2.27e-06	-13.3834	5.56863	-1.10128			0.466102
1368897_at	0.138	0.0488	-2.36511	-5.19359	-1.10096	Smad7	SMAD family member 7	0.466205
1393736_at	0.00367	0.00048	-5.99229	-0.24451	-1.09948			0.466683
1370833_at	0.000594	3.55e-05	-8.96799	2.60835	-1.09942	Pex5l	peroxisomal biogenesis factor 5-like	0.466703
1380029_at	0.00716	0.00116	-5.17738	-1.20672	-1.09935	Atmin	ATM interactor	0.466728
1390655_at	0.00495	0.000713	-5.61593	-0.67765	-1.09906	Apeg3	antisense paternally expressed gene 3	0.466822
1382589_at	0.0423	0.0109	-3.39867	-3.63183	-1.09846	Ankrd55	ankyrin repeat domain 55	0.467016
1373032_at	0.0612	0.0173	-3.0697	-4.1237	-1.09836	Mustn1	musculoskeletal, embryonic nuclear protein 1	0.467046
1382127_at	0.00077	5.18e-05	-8.4744	2.19549	-1.09814			0.467117
1383934_at	0.000195	5.63e-06	-11.7498	4.60372	-1.09805	LOC102555520	uncharacterized LOC102555520	0.467147
1377998_at	0.000191	5.41e-06	-11.8148	4.64469	-1.09794	Cpox	coproporphyrinogen oxidase	0.467185
1387271_at	0.000317	1.32e-05	-10.3831	3.68708	-1.0978	Phyh	phytanoyl-CoA 2-hydroxylase	0.467228
1390196_at	0.0191	0.00403	-4.14171	-2.56534	-1.09776	Syn1	synapsin I	0.467241
1384238_at	0.000844	5.91e-05	-8.30819	2.05173	-1.09691	Ttyh2	tweety family member 2	0.467517
1370545_at	0.00268	0.000315	-6.41422	0.21923	-1.09683	Kcna1	potassium voltage-gated channel subfamily A member 1	0.467544
1387910_at	0.0124	0.00235	-4.57434	-1.97894	-1.09641	Epb41l1	erythrocyte membrane protein band 4.1-like 1	0.467679
1387071_a_at	0.0247	0.00558	-3.89233	-2.91535	-1.09594	Mapt	microtubule-associated protein tau	0.467831
1368137_at	0.00269	0.000316	-6.41021	0.21494	-1.09582	Mapt	microtubule-associated protein tau	0.467869
1368899_at	0.0238	0.00535	-3.92396	-2.87048	-1.09567	Bmpr1a	bone morphogenetic protein receptor type 1A	0.467919
1395866_at	0.00158	0.000151	-7.19925	1.02517	-1.0956			0.467941
1391757_at	0.00675	0.00107	-5.24434	-1.12419	-1.09501	Ptpn4	protein tyrosine phosphatase, non-receptor type 4	0.468132
1369692_at	0.00308	0.000378	-6.22942	0.01888	-1.09455	Tnr	tenascin R	0.468281
1376203_at	0.00274	0.000323	-6.38674	0.18971	-1.09434	Arhgef4	Rho guanine nucleotide exchange factor 4	0.468351
1386186_s_at	0.0647	0.0185	-3.02295	-4.1943	-1.09429			0.468366
1391092_at	0.00213	0.000228	-6.75112	0.57383	-1.09409	Glrb	glycine receptor, beta	0.46843
1389347_at	0.00329	0.000413	-6.14129	-0.07817	-1.09386	Pitpnm1	phosphatidylinositol transfer protein, membrane-associated 1	0.468507
1391222_at	0.0218	0.00478	-4.01025	-2.74878	-1.09314	N4bp1	Nedd4 binding protein 1	0.46874
1388011_a_at	0.00204	0.000215	-6.8143	0.63884	-1.09248	Tgfb2	transforming growth factor, beta 2	0.468956
1381583_at	0.0168	0.00343	-4.26794	-2.39147	-1.09205	Nlgn1	neuroligin 1	0.469095
1375962_at	0.000243	8.28e-06	-11.1105	4.18873	-1.09167			0.469218
1376082_at	0.00656	0.00103	-5.27998	-1.08053	-1.0912	Mecom	MDS1 and EVI1 complex locus	0.469369
1387505_at	0.00014	3.19e-06	-12.7488	5.20894	-1.0912	Gnai1	G protein subunit alpha i1	0.469372
1385719_at	0.000146	3.37e-06	-12.648	5.1501	-1.09062			0.469559
1372920_at	0.000544	3.1e-05	-9.15059	2.75597	-1.08987	Prodh1	proline dehydrogenase 1	0.469805
1389363_at	5.68e-05	5.68e-07	-16.3008	7.01633	-1.08965	Adi1	acireductone dioxygenase 1	0.469876
1384272_at	0.00161	0.000154	-7.17959	1.00583	-1.08902			0.470082
1368509_at	0.00144	0.000133	-7.34217	1.16446	-1.08879	Bbs2	Bardet-Biedl syndrome 2	0.470157
1382579_at	0.0911	0.0287	-2.72321	-4.64942	-1.08865	Tox3	TOX high mobility group box family member 3	0.4702
1370407_at	0.00495	0.000714	-5.61481	-0.67896	-1.08854	Pcyox1	prenylcysteine oxidase 1	0.470236
1394395_at	0.0113	0.00207	-4.67828	-1.84209	-1.08763			0.470534
1384158_at	0.0566	0.0157	-3.14057	-4.01697	-1.08709			0.47071
1375011_at	0.000245	8.42e-06	-11.0835	4.17064	-1.08676			0.470819
1384118_at	0.00252	0.000287	-6.50835	0.31967	-1.08669	Zfp329	zinc finger protein 329	0.470839
1370020_at	0.0517	0.014	-3.22091	-3.89645	-1.08632	Slc25a10	solute carrier family 25 member 10	0.470961
1375826_at	0.156	0.0568	-2.26316	-5.34719	-1.08614	Gpr61	G protein-coupled receptor 61	0.471019
1384716_at	0.0181	0.00377	-4.19421	-2.49275	-1.08602	Syt1	synaptotagmin 1	0.471059
1373223_at	0.00052	2.88e-05	-9.25128	2.83625	-1.08598	Fam171b	family with sequence similarity 171, member B	0.471073
1392178_at	0.0293	0.00688	-3.73486	-3.14065	-1.0856	Slitrk1	SLIT and NTRK-like family, member 1	0.471196
1387376_at	0.0723	0.0214	-2.92413	-4.34394	-1.08478	Aox1	aldehyde oxidase 1	0.471463
1375223_at	0.00108	8.62e-05	-7.84693	1.63945	-1.0846			0.471523
1375562_at	0.00533	0.000785	-5.52672	-0.78311	-1.08428			0.471628
1381621_at	0.212	0.0879	-1.97163	-5.77877	-1.08425			0.471638
1390939_at	0.192	0.0759	-2.07022	-5.63442	-1.08399			0.471723
1384376_at	0.0854	0.0265	-2.77819	-4.56572	-1.08357	Dnajb14	DnaJ heat shock protein family (Hsp40) member B14	0.471859
1368060_at	0.0011	8.83e-05	-7.81748	1.61244	-1.08351	Rida	reactive intermediate imine deaminase A homolog	0.471878
1386955_at	0.00948	0.00166	-4.86196	-1.60408	-1.0833	2018-09-05	septin 5	0.471947
1370601_a_at	0.055	0.0151	-3.16582	-3.97903	-1.08277	Grin3a	glutamate ionotropic receptor NMDA type subunit 3A	0.472122
1375278_at	0.000458	2.38e-05	-9.52031	3.04689	-1.08253	Trim2	tripartite motif-containing 2	0.472201
1397630_at	0.00142	0.00013	-7.3634	1.18496	-1.08247	Hecw2	HECT, C2 and WW domain containing E3 ubiquitin protein ligase 2	0.472218
1393081_at	0.044	0.0115	-3.36264	-3.68521	-1.08185	Rasgef1a	RasGEF domain family, member 1A	0.472423
1373301_at	0.000946	7.05e-05	-8.09019	1.85936	-1.08169	Ppp1r13b	protein phosphatase 1, regulatory subunit 13B	0.472476
1382775_at	0.244	0.112	-1.81044	-6.00997	-1.08132	Ryr2	ryanodine receptor 2	0.472596
1374934_at	0.0225	0.00496	-3.98101	-2.78991	-1.081			0.472702
1376110_at	0.000288	1.11e-05	-10.6426	3.8698	-1.08091	Rpp25	ribonuclease P/MRP 25 subunit	0.47273
1394330_at	0.0346	0.00849	-3.57953	-3.36596	-1.08058			0.47284
1382748_at	0.00107	8.43e-05	-7.87256	1.66289	-1.07983	Mut	methylmalonyl CoA mutase	0.473083
1373125_at	0.021	0.00455	-4.04715	-2.69705	-1.07976	Klc2	kinesin light chain 2	0.473109
1383300_at	0.000941	6.99e-05	-8.10071	1.86875	-1.07949	Klhl24	kelch-like family member 24	0.473196
1378721_at	0.0175	0.00361	-4.22888	-2.44503	-1.07868			0.473463
1376702_at	0.00759	0.00125	-5.10651	-1.29475	-1.07864	Mlc1	megalencephalic leukoencephalopathy with subcortical cysts 1	0.473473
1379568_at	0.206	0.0841	-2.00141	-5.73537	-1.07806	Ifit2	interferon-induced protein with tetratricopeptide repeats 2	0.473665
1384634_at	0.0517	0.014	-3.22116	-3.89607	-1.07793	Fam222a	family with sequence similarity 222, member A	0.473708
1377393_at	0.000825	5.7e-05	-8.35407	2.09165	-1.07782	Frmd5	FERM domain containing 5	0.473745
1379373_at	0.0567	0.0157	-3.1388	-4.01964	-1.07742			0.473875
1371063_at	0.0334	0.00813	-3.61081	-3.32036	-1.07714	Sh3gl2	SH3 domain-containing GRB2-like 2	0.473969
1394057_at	0.000386	1.78e-05	-9.93162	3.35858	-1.07701	LOC100909913///Ndp	norrin-like///NDP, norrin cystine knot growth factor	0.47401
1393635_x_at	8.29e-05	1.19e-06	-14.6805	6.25085	-1.07699	Tubb4a	tubulin, beta 4A class IVa	0.474016
1370687_a_at	0.00162	0.000156	-7.15986	0.98638	-1.07682	Ntrk2	neurotrophic receptor tyrosine kinase 2	0.474072
1398578_at	0.00843	0.00144	-4.98561	-1.4466	-1.07503	Ttyh1	tweety family member 1	0.474662
1386899_at	0.00219	0.000235	-6.71732	0.53886	-1.07465	Ctsh	cathepsin H	0.474785
1383633_at	0.000138	3.05e-06	-12.8339	5.25828	-1.0744			0.474869
1381976_at	0.000293	1.15e-05	-10.5948	3.8365	-1.07412	Kif21a	kinesin family member 21A	0.474962
1376460_at	0.000947	7.06e-05	-8.08834	1.85771	-1.07311	Rbfox3	RNA binding protein, fox-1 homolog 3	0.475293
1376417_at	0.0115	0.00213	-4.65539	-1.87209	-1.0731			0.475295
1370489_a_at	0.0193	0.00407	-4.13373	-2.5764	-1.07303	Plcb4	phospholipase C, beta 4	0.475321
1370069_at	0.00806	0.00136	-5.03434	-1.38515	-1.07297	Slc12a5	solute carrier family 12 member 5	0.475339
1396265_at	0.00104	8.1e-05	-7.92095	1.70696	-1.07207			0.475638
1390690_at	0.00822	0.0014	-5.01277	-1.4123	-1.07193			0.475682
1379641_at	0.000111	2.1e-06	-13.5398	5.65454	-1.07158			0.475796
1372665_at	0.0225	0.00496	-3.98102	-2.7899	-1.07144	Psat1	phosphoserine aminotransferase 1	0.475843
1374890_at	0.000443	2.24e-05	-9.60582	3.1127	-1.07143	Evi5	ecotropic viral integration site 5	0.475846
1367996_a_at	0.000704	4.53e-05	-8.64842	2.34341	-1.0713	Adgrl1	adhesion G protein-coupled receptor L1	0.475891
1373956_at	0.000581	3.41e-05	-9.02114	2.65159	-1.07128	Fundc1	FUN14 domain containing 1	0.475897
1394831_at	0.0386	0.00971	-3.48108	-3.51023	-1.07108	LOC102552888	uncharacterized LOC102552888	0.475962
1377095_at	0.0073	0.00119	-5.1535	-1.2363	-1.07066	Rbfox3	RNA binding protein, fox-1 homolog 3	0.4761
1395404_at	0.00272	0.000321	-6.39513	0.19874	-1.06999	Fn3krp	fructosamine-3-kinase-related protein	0.476322
1367659_s_at	0.00492	0.000706	-5.62515	-0.6668	-1.06982	Eci1	enoyl-CoA delta isomerase 1	0.476377
1391829_at	0.0139	0.0027	-4.45968	-2.13173	-1.06903	Fsd1l	fibronectin type III and SPRY domain containing 1-like	0.476639
1386119_at	0.00055	3.16e-05	-9.12533	2.73571	-1.0687			0.476747
1368132_at	0.000844	5.91e-05	-8.30917	2.05258	-1.06824	Tob1	transducer of ErbB-2.1	0.476899
1376933_at	0.00552	0.000824	-5.48192	-0.83648	-1.06823			0.476904
1370285_at	0.016	0.00322	-4.31994	-2.32051	-1.06821	LOC100912282///Calcoco1	calcium-binding and coiled-coil domain-containing protein 1-like///calcium binding and coiled coil domain 1	0.476912
1392867_at	0.0122	0.00229	-4.59629	-1.9499	-1.06766			0.477092
1383468_at	0.00161	0.000154	-7.17865	1.00491	-1.06594			0.477661
1383044_at	0.22	0.0934	-1.93064	-5.83818	-1.06574	Fryl	FRY like transcription coactivator	0.477728
1374871_at	0.000358	1.58e-05	-10.1061	3.48718	-1.06571	Asrgl1	asparaginase like 1	0.477736
1398304_at	0.068	0.0198	-2.9769	-4.26396	-1.06535	Fzd2	frizzled class receptor 2	0.477856
1386914_at	0.0148	0.00292	-4.39623	-2.21709	-1.06512	Gmpr	guanosine monophosphate reductase	0.477934
1371691_at	0.0241	0.00543	-3.91294	-2.8861	-1.06507	Rarres2	retinoic acid receptor responder 2	0.477949
1378152_at	0.00441	0.000612	-5.75886	-0.51093	-1.06463	Cdkl5	cyclin-dependent kinase-like 5	0.478095
1374885_at	0.00234	0.000257	-6.62179	0.4393	-1.06462	Slc12a6	solute carrier family 12, member 6	0.4781
1391431_at	0.0106	0.00192	-4.74303	-1.75762	-1.06419			0.478241
1378474_at	0.000386	1.79e-05	-9.92927	3.35683	-1.06404			0.478292
1383810_at	0.000411	1.98e-05	-9.77992	3.24504	-1.06397	Zmym2	zinc finger MYM-type containing 2	0.478315
1393739_at	0.027	0.00624	-3.80793	-3.03571	-1.06377			0.478381
1390706_at	0.00109	8.74e-05	-7.82946	1.62344	-1.06313	Sptbn1	spectrin, beta, non-erythrocytic 1	0.478592
1371984_at	0.00358	0.000462	-6.02894	-0.20333	-1.06307	Ldb3	LIM domain binding 3	0.478613
1372856_at	0.143	0.0508	-2.33753	-5.23523	-1.06307	Plin4	perilipin 4	0.478614
1372235_at	0.0859	0.0267	-2.77317	-4.57336	-1.06306	Miat	myocardial infarction associated transcript (non-protein coding)	0.478614
1375343_at	0.262	0.131	-1.70076	-6.16306	-1.06224			0.478887
1369053_at	0.0981	0.0315	-2.66054	-4.74485	-1.06201	Syt2	synaptotagmin 2	0.478963
1383047_at	0.00764	0.00127	-5.09697	-1.30666	-1.06109	Gas6	growth arrest specific 6	0.479268
1382006_at	0.00028	1.05e-05	-10.726	3.92763	-1.06106	Snapin	SNAP-associated protein	0.479279
1383777_at	0.074	0.022	-2.9033	-4.37555	-1.06071			0.479395
1393099_at	0.0121	0.00227	-4.60243	-1.9418	-1.06063	Cox11	COX11 cytochrome c oxidase copper chaperone	0.479423
1373631_at	0.0229	0.00508	-3.9632	-2.81502	-1.0603	Rap1gap	Rap1 GTPase-activating protein	0.479533
1398445_at	0.0104	0.00185	-4.77051	-1.72196	-1.06011			0.479596
1377706_x_at	0.142	0.0504	-2.34299	-5.227	-1.05999			0.479635
1384996_at	0.0439	0.0114	-3.366	-3.68023	-1.05992			0.479657
1388936_at	0.000943	7.01e-05	-8.09669	1.86516	-1.05938	Cdh11	cadherin 11	0.479837
1384029_at	0.00271	0.000318	-6.40303	0.20723	-1.05923	Xpa	XPA, DNA damage recognition and repair factor	0.479889
1383531_at	0.00208	0.000221	-6.78395	0.60767	-1.05906	Crebrf	CREB3 regulatory factor	0.479946
1382294_at	0.000457	2.36e-05	-9.52668	3.05181	-1.05874			0.480051
1377753_at	0.0708	0.0208	-2.94272	-4.31576	-1.05824			0.480219
1367909_at	0.0814	0.0249	-2.81948	-4.5029	-1.05781	Dcxr	dicarbonyl and L-xylulose reductase	0.480362
1370465_at	0.00601	0.000922	-5.38007	-0.95886	-1.05769	Abcb1a	ATP binding cassette subfamily B member 1A	0.480401
1391744_at	0.00124	0.000107	-7.59451	1.40515	-1.05753	LOC102548389	zinc finger protein 709-like	0.480455
1394738_at	0.00183	0.000184	-6.982	0.80917	-1.05629			0.480868
1384756_at	0.000697	4.46e-05	-8.6679	2.35981	-1.05615	Slc43a2	solute carrier family 43 member 2	0.480914
1394904_at	0.00205	0.000217	-6.80404	0.62831	-1.05543	Necap1	NECAP endocytosis associated 1	0.481155
1377145_at	0.27	0.141	-1.65103	-6.23113	-1.05514	Adgrv1	adhesion G protein-coupled receptor V1	0.48125
1390865_at	0.0708	0.0208	-2.9419	-4.317	-1.05491	Cadps2	calcium dependent secretion activator 2	0.481329
1380655_at	0.00934	0.00164	-4.87605	-1.58601	-1.05439	Mok	MOK protein kinase	0.481502
1390443_at	0.00628	0.000975	-5.32942	-1.02025	-1.05389	RGD1563888	similar to DNA segment, Chr 16, ERATO Doi 472, expressed	0.481668
1382301_at	0.000228	7.51e-06	-11.2674	4.29272	-1.0535			0.481798
1384877_at	0.00385	0.000509	-5.93471	-0.30957	-1.05341	Aqp11	aquaporin 11	0.481828
1375531_at	0.00388	0.000515	-5.9245	-0.32115	-1.0533	Lrig3	leucine-rich repeats and immunoglobulin-like domains 3	0.481864
1371875_at	0.00886	0.00153	-4.93113	-1.5157	-1.05284	Manba	mannosidase beta	0.482018
1394575_at	0.0201	0.00431	-4.08957	-2.63781	-1.05219	Gnal	G protein subunit alpha L	0.482237
1373333_at	0.000315	1.3e-05	-10.4014	3.70013	-1.05199	MGC109340	similar to Microsomal signal peptidase 23 kDa subunit (SPase 22 kDa subunit) (SPC22/23)	0.482302
1370606_at	0.0168	0.00344	-4.26633	-2.39367	-1.05179	P2ry1	purinergic receptor P2Y1	0.482371
1367913_at	0.000817	5.63e-05	-8.37048	2.10589	-1.05128	Cygb	cytoglobin	0.482539
1382844_at	0.00831	0.00141	-5.0023	-1.42551	-1.05078	RGD1310951	similar to RIKEN cDNA E130308A19	0.482708
1390339_at	0.04	0.0101	-3.45031	-3.55555	-1.05052			0.482794
1393143_at	0.0119	0.00222	-4.62087	-1.91747	-1.05042	Pitpnc1	phosphatidylinositol transfer protein, cytoplasmic 1	0.482829
1368322_at	0.005	0.000722	-5.60449	-0.69111	-1.05024	Sod3	superoxide dismutase 3, extracellular	0.482889
1370043_at	0.00126	0.000109	-7.57168	1.38364	-1.05018	Alcam	activated leukocyte cell adhesion molecule	0.482909
1370746_at	0.00136	0.000122	-7.43763	1.25629	-1.05013	Prkacb	protein kinase cAMP-activated catalytic subunit beta	0.482925
1392921_at	0.0148	0.00294	-4.39278	-2.22175	-1.04988	Ppm1k	protein phosphatase, Mg2+/Mn2+ dependent, 1K	0.483009
1376636_at	0.00685	0.0011	-5.22456	-1.1485	-1.04962	Tgfbr1	transforming growth factor, beta receptor 1	0.483095
1384857_at	0.25	0.116	-1.78385	-6.04742	-1.04922	Akap9	A-kinase anchoring protein 9	0.483229
1379953_at	0.00316	0.000391	-6.19468	-0.01926	-1.04891	Pptc7	PTC7 protein phosphatase homolog	0.483332
1372048_at	0.00484	0.000691	-5.64472	-0.64384	-1.04831	Podxl2	podocalyxin-like 2	0.483534
1375886_at	0.00184	0.000185	-6.97458	0.8017	-1.04826	Ipp	intracisternal A particle-promoted polypeptide	0.483552
1384453_at	0.0158	0.00317	-4.33057	-2.30605	-1.04735			0.483857
1391579_at	0.316	0.221	-1.34054	-6.63277	-1.04734			0.48386
1373258_at	0.00137	0.000124	-7.42044	1.23982	-1.04506	Ctsf	cathepsin F	0.484626
1398326_at	0.000244	8.38e-06	-11.0912	4.17582	-1.04478	Chchd10	coiled-coil-helix-coiled-coil-helix domain containing 10	0.484718
1385601_at	0.252	0.118	-1.77217	-6.06382	-1.04429	Frg1	FSHD region gene 1	0.484884
1395233_at	0.00212	0.000226	-6.76079	0.58381	-1.04414			0.484935
1379412_at	0.0475	0.0126	-3.2944	-3.78669	-1.04395			0.484998
1396860_s_at	0.0063	0.000979	-5.32588	-1.02455	-1.04389	Zfp423	zinc finger protein 423	0.485018
1377880_at	0.00205	0.000217	-6.80382	0.62809	-1.04382	LOC683508	similar to Zinc finger X-linked protein ZXDB	0.485041
1373350_at	0.00429	0.000589	-5.79537	-0.46878	-1.04377	Psip1	PC4 and SFRS1 interacting protein 1	0.485058
1378628_at	0.0869	0.0271	-2.7622	-4.59006	-1.04307			0.485295
1396378_at	0.0882	0.0276	-2.74951	-4.60938	-1.04302			0.485309
1392183_at	0.000793	5.41e-05	-8.42035	2.14901	-1.04233			0.485543
1375851_at	0.0353	0.00871	-3.56018	-3.39422	-1.04231	Klhl8	kelch-like family member 8	0.48555
1385909_at	0.0524	0.0142	-3.20861	-3.91486	-1.04227			0.485562
1385868_at	8.82e-05	1.35e-06	-14.4102	6.11417	-1.04199			0.485657
1370697_a_at	0.0223	0.00491	-3.98972	-2.77764	-1.04163	Nexn	nexilin (F actin binding protein)	0.48578
1388319_at	0.0657	0.0189	-3.00979	-4.21419	-1.04089			0.486028
1379821_at	0.139	0.0489	-2.36305	-5.19671	-1.04065	Gpr62	G protein-coupled receptor 62	0.486109
1391944_at	0.0165	0.00334	-4.29	-2.36132	-1.03972	Fam184a	family with sequence similarity 184, member A	0.486423
1393004_at	0.00713	0.00115	-5.18188	-1.20116	-1.03951	Phf24	PHD finger protein 24	0.486493
1379214_at	0.00418	0.000569	-5.82894	-0.43019	-1.03903			0.486654
1389242_at	0.00263	0.000306	-6.44414	0.25128	-1.03832			0.486896
1375307_at	0.00299	0.000364	-6.26688	0.05984	-1.03807	Cbx6	chromobox 6	0.486979
1367612_at	0.00224	0.000242	-6.6847	0.50498	-1.03793	Mgst1	microsomal glutathione S-transferase 1	0.487025
1371844_at	0.000184	5.03e-06	-11.9409	4.72346	-1.03781	Ahcyl1	adenosylhomocysteinase-like 1	0.487065
1392074_at	0.0317	0.00763	-3.65758	-3.25238	-1.03694	Cped1	cadherin-like and PC-esterase domain containing 1	0.487359
1383707_at	0.0511	0.0138	-3.23101	-3.88134	-1.03694	Gria4	glutamate ionotropic receptor AMPA type subunit 4	0.487362
1373756_at	0.00702	0.00113	-5.19843	-1.1807	-1.03661	LOC100911402///Cend1	cell cycle exit and neuronal differentiation protein 1-like///cell cycle exit and neuronal differentiation 1	0.487471
1382814_at	0.0108	0.00197	-4.72138	-1.78579	-1.03658	Tenm3	teneurin transmembrane protein 3	0.487482
1376366_at	0.00201	0.000211	-6.83193	0.6569	-1.03636	Snapin	SNAP-associated protein	0.487556
1380170_at	0.0177	0.00366	-4.21678	-2.46166	-1.03557	LOC100359937///LOC501441///Gabarapl2	GABA(A) receptor-associated protein-like 2-like///similar to GABA(A) receptor-associated protein like 2///GABA(A) receptor-associated protein like 2	0.487822
1382510_at	0.000107	1.97e-06	-13.6605	5.72011	-1.03545			0.487862
1398732_at	0.104	0.0338	-2.61189	-4.81894	-1.03538			0.487888
1386985_at	0.00598	0.000917	-5.38482	-0.95311	-1.03503	Gstm1	glutathione S-transferase mu 1	0.488006
1396596_at	0.248	0.115	-1.7919	-6.0361	-1.03464			0.488137
1370114_a_at	0.326	0.242	-1.27362	-6.71304	-1.03455	Pik3r1	phosphoinositide-3-kinase regulatory subunit 1	0.488169
1383096_at	0.0163	0.00331	-4.29795	-2.35046	-1.03451	Aplp2	amyloid beta precursor like protein 2	0.488182
1390722_at	0.262	0.131	-1.70083	-6.16296	-1.03389			0.488392
1387172_a_at	0.0176	0.00363	-4.22333	-2.45265	-1.03356	Tgfb2	transforming growth factor, beta 2	0.488502
1376184_at	0.0194	0.0041	-4.12801	-2.58434	-1.03317	Lynx1	Ly6/neurotoxin 1	0.488635
1379903_at	0.000625	3.82e-05	-8.86958	2.52766	-1.03286			0.488741
1380471_at	0.000527	2.96e-05	-9.21342	2.80615	-1.03278			0.488766
1368675_at	0.00954	0.00168	-4.85483	-1.61322	-1.03264	Chn2	chimerin 2	0.488815
1376245_x_at	0.0344	0.00843	-3.58487	-3.35816	-1.03258	Agap3	ArfGAP with GTPase domain, ankyrin repeat and PH domain 3	0.488835
1391030_at	0.00109	8.76e-05	-7.82782	1.62193	-1.03228	Camta1	calmodulin binding transcription activator 1	0.488937
1394416_at	0.132	0.0457	-2.40905	-5.12711	-1.03206	Prickle2	prickle planar cell polarity protein 2	0.489012
1371281_at	0.0054	0.0008	-5.5097	-0.80335	-1.03175	Hoxc8	homeobox C8	0.489117
1368985_at	0.04	0.0101	-3.44971	-3.55643	-1.03173	Grin2a	glutamate ionotropic receptor NMDA type subunit 2A	0.489123
1376266_at	0.0431	0.0111	-3.38349	-3.65431	-1.03172			0.489126
1378591_at	0.00225	0.000245	-6.67575	0.49568	-1.03118			0.489309
1371081_at	0.00362	0.000471	-6.01185	-0.22252	-1.03097	Rapgef4	Rap guanine nucleotide exchange factor 4	0.489381
1390907_at	0.0301	0.00712	-3.70914	-3.17776	-1.02976	LOC691170	similar to zinc finger protein 84 (HPF2)	0.489791
1379693_at	0.00567	0.000856	-5.44774	-0.87739	-1.02934	Robo2	roundabout guidance receptor 2	0.489933
1388795_at	0.000172	4.5e-06	-12.136	4.84371	-1.02906	Tppp	tubulin polymerization promoting protein	0.490029
1380143_at	0.0627	0.0178	-3.04971	-4.15387	-1.02844			0.490242
1392864_at	0.000331	1.41e-05	-10.2829	3.61539	-1.02765	Arhgap5	Rho GTPase activating protein 5	0.490509
1390569_at	0.16	0.0591	-2.23652	-5.38715	-1.02693	Cndp1	carnosine dipeptidase 1	0.490752
1382575_at	0.00106	8.41e-05	-7.87634	1.66634	-1.02685			0.49078
1394450_at	0.000448	2.28e-05	-9.57511	3.08912	-1.02557			0.491216
1372381_at	0.0028	0.000333	-6.35709	0.15775	-1.02542			0.491268
1382025_at	0.0143	0.00281	-4.42936	-2.17245	-1.02513	Mtm1	myotubularin 1	0.491366
1382836_at	0.166	0.062	-2.20456	-5.43498	-1.02462			0.491541
1383305_at	5.83e-05	5.9e-07	-16.214	6.97752	-1.02445			0.491598
1372104_at	0.000152	3.64e-06	-12.5116	5.06975	-1.0244			0.491616
1370438_at	0.0691	0.0202	-2.96312	-4.28483	-1.02434	Nos1ap	nitric oxide synthase 1 adaptor protein	0.491634
1377883_at	0.00109	8.68e-05	-7.83875	1.63195	-1.02397			0.491762
1393231_at	0.00119	9.93e-05	-7.67886	1.48415	-1.02298	Ppp4r2	protein phosphatase 4, regulatory subunit 2	0.492098
1377908_at	0.0371	0.00928	-3.51408	-3.46175	-1.0228			0.492161
1367923_at	0.00132	0.000116	-7.49306	1.30917	-1.02229	Acsbg1	acyl-CoA synthetase bubblegum family member 1	0.492334
1387081_at	7.94e-05	1.07e-06	-14.8989	6.35936	-1.02226	Rcn2	reticulocalbin 2	0.492346
1377681_at	0.00021	6.35e-06	-11.5467	4.47437	-1.02213			0.492388
1383195_at	0.00219	0.000236	-6.7152	0.53666	-1.02196			0.492448
1369404_a_at	0.000115	2.26e-06	-13.3995	5.57754	-1.0218	Nrxn1	neurexin 1	0.492501
1373266_at	0.0177	0.00367	-4.21426	-2.46514	-1.02173	Fam107a	family with sequence similarity 107, member A	0.492525
1395081_at	0.000315	1.3e-05	-10.4053	3.70291	-1.02153	Ncoa7	nuclear receptor coactivator 7	0.492594
1380387_at	0.221	0.094	-1.92658	-5.84404	-1.02093	Foxp2	forkhead box P2	0.492799
1376038_at	0.000555	3.2e-05	-9.10733	2.72124	-1.0205	Tex2	testis expressed 2	0.492946
1370571_at	0.0142	0.00277	-4.43917	-2.15926	-1.02046	Slco3a1	solute carrier organic anion transporter family, member 3a1	0.492959
1377331_at	5.06e-05	4.41e-07	-16.8984	7.27734	-1.02003			0.493106
1382267_at	0.00926	0.00162	-4.88529	-1.57419	-1.01977	Fjx1	four jointed box 1	0.493195
1379232_at	0.00436	0.000603	-5.77339	-0.49414	-1.01959	LOC100911914///LOC100911865///LOC685933	TBC1 domain family member 12-like///TBC1 domain family member 12-like///hypothetical protein LOC685933	0.493258
1396317_at	0.00461	0.00065	-5.70229	-0.57658	-1.01907	Ccpg1	cell cycle progression 1	0.493436
[truncated: 29,104 more rows]
