# Supplementary material for: Comparative Transcriptomics of Rat and Axolotl After Spinal Cord Injury Dissects Differences and Similarities in Inflammatory and Matrix Remodeling Gene Expression Patterns
Source: Front Neurosci. 2018 Nov 13;12:808. doi: 10.3389/fnins.2018.00808 (PMC6262295; doi:10.3389/fnins.2018.00808)
Supplement: Supplementary file 5 [file Table_5.XLSX]

## Sheet: AXO DAY3
Axolotl DAY 3
Genes are sorted by Fold-Change (FC) Injury / Control. Negative values are downregulated after Injury and positive values are upregulated after Injury. T-test p-value. Benjamini-Hochberg adjusted p-value. Unlog2 is also shown.
UNINJURED VS SCI DAY 3
DOWNLOADED FROM: https://www.ncbi.nlm.nih.gov/geo/query/acc.cgi?acc=GSE71934
ID	adj.P.Val	P.Value	t	B	logFC	Gene symbol (human homolog)	Gene name (human homolog)	unlog2
axo08053-f_at	8.77e-10	3.06e-13	-99.2524	20.676	-5.41461	KRT15	keratin 15	0.0234444
axo10795-f_at	3.77e-08	2.82e-10	-40.8226	14.5537	-4.27284	GFPT2	glutamine-fructose-6-phosphate transaminase 2	0.0517306
axo08178-f_at	1.79e-08	7.21e-11	-48.7606	15.9297	-4.25712	MMP3	matrix metalloproteinase 3 preproprotein	0.0522971
axo06854-f_at	2.65e-08	1.58e-10	-44.0152	15.1428	-4.2517	MMP1	matrix metalloproteinase 1 isoform 2	0.052494
axo06666-r_at	4.98e-08	4.84e-10	-38.0381	13.994	-3.92611	MX1	myxovirus resistance protein 1	0.0657846
axo16299-f_at	8.84e-08	1.28e-09	-33.4929	12.9717	-3.87243	RHBDL2	rhomboid-related protein 2	0.0682785
axo14037-f_at	1.06e-08	3e-11	-54.6464	16.7828	-3.84184	FAM115A	hypothetical protein LOC9747	0.0697414
axo09429-f_at	4.3e-08	3.73e-10	-39.3527	14.264	-3.7515	OASL	2'-5'-oligoadenylate synthetase-like isoform a	0.0742482
axo20503-f_at	1.61e-08	6.03e-11	-49.9081	16.1059	-3.69794	CLDN3	claudin 3	0.0770567
axo10609-f_at	9.39e-09	2.5e-11	-55.9723	16.9589	-3.68913	DNASE1L3	deoxyribonuclease I-like 3 precursor	0.0775283
axo03268-f_at	9.39e-09	2.53e-11	-55.8944	16.9487	-3.65873	KRT12	keratin 12	0.0791793
axo02986-f_at	8.84e-08	1.24e-09	-33.6542	13.0106	-3.64199	GRHL3	sister-of-mammalian grainyhead protein isoform 2	0.0801036
axo00472-f_at	7.4e-07	3.48e-08	-21.7171	9.40421	-3.60365	S100Z	S100 calcium binding protein Z	0.0822608
axo06338-r_at	9.42e-08	1.44e-09	-32.9998	12.8515	-3.52899	ALOX12B	arachidonate 12-lipoxygenase, 12R type	0.0866302
axo08180-f_at	2.13e-08	9.26e-11	-47.194	15.6806	-3.46519	MMP3	matrix metalloproteinase 3 preproprotein	0.090547
axo08181-f_at	8.6e-09	1.54e-11	-59.6228	17.4165	-3.44785	MMP3	matrix metalloproteinase 3 preproprotein	0.0916419
axo07473-f_at	7.65e-09	1.25e-11	-61.2381	17.6072	-3.37679	AREG	amphiregulin preproprotein	0.0962689
axo10986-f_at	2.51e-08	1.43e-10	-44.5897	15.2434	-3.37288	HCLS1	hematopoietic cell-specific Lyn substrate 1	0.0965297
axo09045-f_at	9.39e-09	2.36e-11	-56.4063	17.0153	-3.31688	PHLDA2	pleckstrin homology-like domain family A member 2	0.100351
axo12644-f_at	1.57e-08	5.79e-11	-50.1654	16.1447	-3.30316	KERA	keratocan	0.101309
axo00990-r_at	8.68e-09	1.64e-11	-59.1137	17.3549	-3.2741	CAPN13	calpain 13	0.103371
axo03422-f_at	5.04e-09	5.77e-12	-67.7367	18.3097	-3.26034	LEP	leptin precursor	0.104361
axo10796-r_at	2.12e-07	5.25e-09	-27.846	11.4634	-3.2252	GFPT2	glutamine-fructose-6-phosphate transaminase 2	0.106934
axo07465-f_at	1.72e-07	3.88e-09	-28.9715	11.789	-3.21298	AQP4	aquaporin 4 isoform a	0.107844
axo10575-f_at	2.26e-08	1e-10	-46.7107	15.6018	-3.19711	AQP3	aquaporin 3	0.109037
axo08727-f_at	1.85e-08	7.55e-11	-48.4693	15.8841	-3.16489	MAPK12	mitogen-activated protein kinase 12	0.111499
axo10822-f_at	9.39e-09	2.11e-11	-57.2024	17.1173	-3.04153	FGFBP1	fibroblast growth factor binding protein 1	0.121453
axo12700-r_at	0.000321	8.39e-05	-7.51059	0.76074	-3.0232	TCHH	trichohyalin	0.123006
axo08550-f_at	3.96e-08	3.24e-10	-40.0866	14.4102	-3.00565	PTBP1	polypyrimidine tract-binding protein 1 isoform a	0.124511
axo07098-f_at	1.41e-08	4.65e-11	-51.6271	16.3606	-2.90583	CLDN4	claudin 4	0.133432
axo07246-f_at	4.48e-08	3.93e-10	-39.0812	14.2091	-2.8683	EMP1	epithelial membrane protein 1	0.136948
axo17501-f_at	2.27e-08	1.05e-10	-46.4036	15.5511	-2.84201	ANKRD2	ankyrin repeat domain 2 isoform a	0.139466
axo00377-f_at	3.81e-07	1.36e-08	-24.5688	10.429	-2.83544	COL11A1	alpha 1 type XI collagen isoform B preproprotein	0.140103
axo12849-r_s_at	4.77e-08	4.47e-10	-38.4391	14.0775	-2.78699	TWF2	twinfilin-like protein	0.144888
axo08686-r_at	9.39e-09	2.25e-11	-56.7355	17.0577	-2.78136	RGS2	regulator of G-protein signaling 2, 24kDa	0.145454
axo13198-f_at	2.48e-08	1.33e-10	-45.018	15.3174	-2.7498	IFIT5	interferon-induced protein with tetratricopeptide repeats 5	0.148672
axo08150-f_at	4.08e-08	3.41e-10	-39.8152	14.3565	-2.73682	MATN3	matrilin 3 precursor	0.150015
axo11646-f_at	6.79e-08	8.19e-10	-35.514	13.4445	-2.73051	LIPG	endothelial lipase precursor	0.150673
axo05449-f_at	1.21e-07	2.26e-09	-31.0998	12.3691	-2.72815	NCOA7	nuclear receptor coactivator 7 isoform 2	0.150919
axo07813-f_at	1.3e-07	2.51e-09	-30.6713	12.2559	-2.71897	FCN1	ficolin 1 precursor	0.151883
axo11800-f_at	9.39e-09	2.37e-11	-56.3581	17.009	-2.7169	OAS3	2'-5'oligoadenylate synthetase 3	0.152101
axo11193-r_at	1.13e-07	2.04e-09	-31.511	12.4762	-2.6969	LGALS3BP	galectin 3 binding protein	0.154224
axo00407-f_at	3.48e-08	2.45e-10	-41.58	14.6983	-2.68825	TREX2	three prime repair exonuclease 2	0.155152
axo00254-f_at	4.06e-07	1.48e-08	-24.3138	10.3425	-2.68117	VIT	vitrin	0.155915
axo08183-f_at	4.41e-07	1.68e-08	-23.9123	10.2044	-2.67699	MMP8	matrix metalloproteinase 8 preproprotein	0.156368
axo10775-r_at	1.57e-08	5.56e-11	-50.4421	16.1862	-2.64839	ISG15	ISG15 ubiquitin-like modifier	0.159498
axo13200-f_at	4.27e-07	1.59e-08	-24.0768	10.2613	-2.64635	IFIT5	interferon-induced protein with tetratricopeptide repeats 5	0.159724
axo02517-f_at	3.52e-08	2.51e-10	-41.4288	14.6697	-2.63966	TMEM52	transmembrane protein 52	0.160466
axo11516-f_at	1.81e-06	1.23e-07	-18.3895	8.0187	-2.63584	MCM7	minichromosome maintenance complex component 7 isoform 1	0.160891
axo07724-f_at	3.38e-07	1.13e-08	-25.1751	10.6309	-2.60917	CFD	complement factor D preproprotein	0.163893
axo15307-f_at	2.1e-07	5.19e-09	-27.8886	11.476	-2.58198	PRLH	prolactin releasing hormone	0.167012
axo19588-f_at	6.22e-08	7e-10	-36.2476	13.6087	-2.57795	RTP3	transmembrane protein 7	0.167479
axo19929-f_at	2.79e-08	1.74e-10	-43.4805	15.0478	-2.5719	C2orf40	esophageal cancer related gene 4 protein	0.168183
axo20131-f_at	1.38e-06	8.38e-08	-19.3401	8.4387	-2.56306	SH3KBP1	SH3-domain kinase binding protein 1 isoform b	0.169216
axo05310-f_at	1.61e-07	3.45e-09	-29.4287	11.9175	-2.55605	TAT	tyrosine aminotransferase	0.170041
axo06364-f_at	3e-08	1.95e-10	-42.8294	14.9301	-2.53295	ALOX15B	arachidonate 15-lipoxygenase, second type isoform d	0.172784
axo01995-f_at	4.5e-06	4.16e-07	-15.6319	6.66642	-2.52985	NOXO1	NADPH oxidase organizer 1 isoform b	0.173157
axo06252-f_at	1.65e-07	3.57e-09	-29.2899	11.8787	-2.50865	FDPS	farnesyl diphosphate synthase isoform b	0.17572
axo06665-r_at	2.44e-08	1.2e-10	-45.648	15.4248	-2.49833	MX1	myxovirus resistance protein 1	0.176981
axo10052-f_at	7.23e-08	8.96e-10	-35.0954	13.3491	-2.47504	DUSP5	dual specificity phosphatase 5	0.179862
axo07306-r_at	2.92e-07	8.98e-09	-25.9544	10.8831	-2.47403	IL8	interleukin 8 precursor	0.179988
axo10910-f_s_at	5.46e-08	5.65e-10	-37.2744	13.8322	-2.47373	ETS2	v-ets erythroblastosis virus E26 oncogene homolog 2	0.180026
axo12699-f_at	0.000158	3.6e-05	-8.48109	1.69953	-2.47249	TCHH	trichohyalin	0.18018
axo12270-f_at	2.78e-07	8.36e-09	-26.1988	10.9606	-2.46299	PLK2	polo-like kinase 2	0.18137
axo03481-f_at	1.29e-07	2.48e-09	-30.7226	12.2695	-2.45612	ARL9	ADP-ribosylation factor-like 9	0.182235
axo10817-f_at	8.65e-06	9.78e-07	-13.9382	5.71583	-2.44609	CLEC2B	C-type lectin, superfamily member 2	0.183507
axo03236-f_at	1.72e-07	3.87e-09	-28.9797	11.7914	-2.4428	COL28A1	collagen, type XXVIII precursor	0.183926
axo09755-f_at	1.78e-08	7.09e-11	-48.8625	15.9455	-2.43216	DDIT3	DNA-damage-inducible transcript 3	0.185288
axo19121-f_at	4.54e-07	1.75e-08	-23.7789	10.158	-2.42304	ESRP2	RNA binding motif protein 35B	0.186463
axo02144-f_at	5.21e-08	5.22e-10	-37.6656	13.9156	-2.40628		immunoglobulin superfamily, member 22	0.188641
axo10931-f_at	4.48e-08	3.95e-10	-39.0601	14.2048	-2.40417	FOS	v-fos FBJ murine osteosarcoma viral oncogene homolog	0.188918
axo19293-f_at	2.4e-07	6.48e-09	-27.0933	11.2377	-2.40219	ITPKC	inositol 1,4,5-trisphosphate 3-kinase C	0.189177
axo00298-f_at	2.54e-08	1.48e-10	-44.3964	15.2098	-2.39152	PSAT1	phosphoserine aminotransferase isoform 1	0.190582
axo00756-f_at	5.11e-08	5.07e-10	-37.8099	13.9461	-2.38824	C6orf150	hypothetical protein LOC115004	0.191015
axo00701-r_at	2.99e-08	1.92e-10	-42.9093	14.9447	-2.38797	RRM2	ribonucleotide reductase M2 polypeptide	0.191051
axo19323-f_at	2.13e-08	9.33e-11	-47.1435	15.6724	-2.38519	C6orf27	G7c protein	0.191419
axo00408-f_at	8.61e-08	1.17e-09	-33.8777	13.0641	-2.38479	TREX2	three prime repair exonuclease 2	0.191473
axo20159-f_at	3.83e-08	2.96e-10	-40.552	14.5013	-2.37566	C13orf33	hypothetical protein LOC84935	0.192688
axo07205-f_at	1.23e-06	7.09e-08	-19.7736	8.6234	-2.36802	IL1B	interleukin 1, beta proprotein	0.193712
axo03686-f_at	2.13e-08	9.25e-11	-47.2024	15.682	-2.36392		PREDICTED: hypothetical protein	0.194263
axo18055-f_at	2.26e-08	1.03e-10	-46.5196	15.5703	-2.35968	GRHL3	sister-of-mammalian grainyhead protein isoform 1	0.194835
axo02709-f_at	0.000155	3.5e-05	-8.51693	1.73252	-2.34994	RPGR	retinitis pigmentosa GTPase regulator isoform C	0.196154
axo01498-f_at	5.77e-08	6.17e-10	-36.8474	13.7401	-2.33317	GRPEL2	GrpE-like 2, mitochondrial	0.198448
axo08844-f_at	3.04e-08	2.01e-10	-42.6532	14.8979	-2.33192	UAP1	UDP-N-acteylglucosamine pyrophosphorylase 1	0.19862
axo13199-f_at	2.48e-08	1.36e-10	-44.8954	15.2963	-2.33136	IFIT5	interferon-induced protein with tetratricopeptide repeats 5	0.198696
axo11580-r_s_at	5.45e-07	2.24e-08	-23.015	9.88687	-2.32111	HNRNPM	heterogeneous nuclear ribonucleoprotein M isoform a	0.200114
axo01343-f_at	1.7e-06	1.13e-07	-18.5925	8.11019	-2.31481	SGMS1	sphingomyelin synthase 1	0.200989
axo18129-f_at	2.85e-07	8.66e-09	-26.0796	10.9229	-2.31472	TRIM39	tripartite motif-containing 39 isoform 1	0.201002
axo07260-f_at	2.48e-08	1.39e-10	-44.7665	15.2741	-2.3139	EREG	epiregulin preproprotein	0.201116
axo16703-f_at	8.84e-08	1.22e-09	-33.7017	13.022	-2.31279	LRRC1	leucine rich repeat containing 1	0.20127
axo15223-f_at	3.31e-07	1.1e-08	-25.2774	10.6645	-2.29623	ARRDC2	arrestin domain containing 2 isoform 1	0.203595
axo06251-f_at	1.29e-07	2.48e-09	-30.7299	12.2715	-2.29313	FDPS	farnesyl diphosphate synthase isoform b	0.204033
axo08764-f_at	3.07e-08	2.08e-10	-42.4712	14.8645	-2.2887	DHFR	dihydrofolate reductase	0.20466
axo20034-f_s_at	6.61e-05	1.26e-05	-9.83463	2.87187	-2.27329	CARD6	caspase recruitment domain family, member 6	0.206857
axo02359-f_at	1.01e-05	1.2e-06	-13.5616	5.48961	-2.26955	FLJ36031	hypothetical protein LOC168455	0.207395
axo09995-f_at	1.22e-06	7e-08	-19.8074	8.63767	-2.26379	CDH1	cadherin 1, type 1 preproprotein	0.208224
axo13845-f_at	6.79e-08	8.15e-10	-35.5345	13.4491	-2.26026	GRHL1	leader-binding protein 32 isoform 1	0.208734
axo07720-f_at	5.03e-08	4.94e-10	-37.9375	13.9729	-2.25713	DES	desmin	0.209187
axo08144-f_at	4.77e-08	4.47e-10	-38.4366	14.077	-2.25236	MAS1	MAS1 oncogene	0.209881
axo00296-f_at	6.11e-07	2.62e-08	-22.5505	9.71741	-2.2442	ANTXR2	anthrax toxin receptor 2 isoform 1	0.211072
axo08175-f_at	1.04e-07	1.72e-09	-32.2257	12.6587	-2.23774	MMP1	matrix metalloproteinase 1 isoform 1 preproprotein	0.212019
axo15793-f_at	8.69e-07	4.33e-08	-21.1013	9.16475	-2.2088	PLEK2	pleckstrin 2	0.216314
axo01922-r_at	5.67e-08	5.99e-10	-36.9912	13.7713	-2.207	HNRNPH2	heterogeneous nuclear ribonucleoprotein H2	0.216584
axo06014-r_at	2.48e-08	1.34e-10	-44.9707	15.3093	-2.20061	KRT17	keratin 17	0.217546
axo10164-f_at	9.23e-07	4.72e-08	-20.8654	9.07112	-2.19522	KIF11	kinesin family member 11	0.218359
axo07206-r_at	1.73e-07	3.94e-09	-28.919	11.7742	-2.18009	IL1B	interleukin 1, beta proprotein	0.220662
axo09194-f_at	4.72e-08	4.3e-10	-38.6291	14.1167	-2.17215	HMGA2	high mobility group AT-hook 2 isoform a	0.22188
axo17304-f_at	3.75e-08	2.76e-10	-40.9208	14.5726	-2.16394	ABCB9	ATP-binding cassette, sub-family B (MDR/TAP), member 9 isoform 2	0.223146
axo18502-r_at	1.01e-06	5.36e-08	-20.5185	8.9315	-2.15764	SMYD3	SET and MYND domain containing 3	0.224122
axo18501-f_at	8.11e-08	1.09e-09	-34.2263	13.1468	-2.14783	SMYD3	SET and MYND domain containing 3	0.225652
axo12138-r_at	2.48e-08	1.39e-10	-44.7687	15.2745	-2.1079	FBLN1	fibulin 1 isoform D	0.231984
axo09725-f_at	5.44e-08	5.6e-10	-37.3152	13.841	-2.10657	RHOB	ras homolog gene family, member B	0.232198
axo17518-f_at	8.84e-08	1.28e-09	-33.5146	12.9769	-2.10297	GPR84	G protein-coupled receptor 84	0.232778
axo11157-f_at	4.23e-07	1.57e-08	-24.1269	10.2785	-2.10283	HSPA1L	heat shock 70kDa protein 1-like	0.232801
axo12248-f_at	6.55e-08	7.63e-10	-35.8423	13.5184	-2.09889	PTGES3	unactive progesterone receptor, 23 kD	0.233438
axo15718-f_at	8.84e-08	1.28e-09	-33.5103	12.9759	-2.09329	HERC5	hect domain and RLD 5	0.234345
axo19554-f_at	3.27e-07	1.06e-08	-25.3946	10.7028	-2.09203	EPPK1	epiplakin 1	0.234551
axo12476-f_at	4.5e-06	4.16e-07	-15.6313	6.66609	-2.08673	CCNI	cyclin I	0.235413
axo13134-r_at	6.71e-08	7.98e-10	-35.6301	13.4707	-2.08622	MMD	monocyte to macrophage differentiation-associated precursor	0.235497
axo10237-r_at	3.8e-07	1.35e-08	-24.5918	10.4368	-2.07949	PSPH	phosphoserine phosphatase	0.236599
axo12896-f_at	3.72e-07	1.3e-08	-24.7133	10.4776	-2.07565	LAMB4	laminin, beta 4	0.237228
axo01625-f_at	1.07e-05	1.3e-06	-13.4158	5.40036	-2.06161	TMEM154	transmembrane protein 154	0.239549
axo08558-f_at	3.01e-06	2.45e-07	-16.7773	7.25449	-2.05131	TWF1	twinfilin 1	0.241265
axo07856-r_at	2.95e-08	1.88e-10	-43.0238	14.9655	-2.04609	GBP1	guanylate binding protein 1, interferon-inducible, 67kDa	0.24214
axo12645-r_at	2.35e-07	6.27e-09	-27.2062	11.2719	-2.04069	ESM1	endothelial cell-specific molecule 1 isoform a precursor	0.243047
axo19448-f_at	2.66e-06	2.07e-07	-17.1565	7.44055	-2.04048	COL21A1	collagen, type XXI, alpha 1 precursor	0.243082
axo13166-f_at	6.26e-08	7.11e-10	-36.1755	13.5927	-2.03686	PADI4	peptidyl arginine deiminase, type IV	0.243694
axo14052-r_at	1.21e-06	6.9e-08	-19.8418	8.65211	-2.03404	KIAA0247	hypothetical protein LOC9766	0.24417
axo20626-f_at	1e-07	1.63e-09	-32.4633	12.7184	-2.03401	MYC	myc proto-oncogene protein	0.244175
axo21228-f_at	7.23e-08	9e-10	-35.0792	13.3453	-2.03299	NFKBIA	nuclear factor of kappa light polypeptide gene enhancer in B-cells inhibitor, alpha	0.244349
axo12269-f_at	6.47e-07	2.85e-08	-22.2966	9.62327	-2.03224	PLK2	polo-like kinase 2	0.244475
axo20084-f_s_at	4.04e-07	1.47e-08	-24.3314	10.3485	-2.02989	LMNB2	lamin B2	0.244873
axo09539-f_at	2.57e-07	7.27e-09	-26.6847	11.1123	-2.0289	MATN4	matrilin 4 isoform 1 precursor	0.245042
axo13697-f_at	1.71e-07	3.79e-09	-29.0602	11.8141	-2.02455	OPTC	opticin precursor	0.245782
axo09980-f_at	1.1e-07	1.89e-09	-31.8289	12.558	-2.01993	CAMP	cathelicidin antimicrobial peptide	0.24657
axo09994-f_at	1.53e-07	3.23e-09	-29.6753	11.9858	-2.01364	CDH1	cadherin 1, type 1 preproprotein	0.247648
axo00809-f_at	7.43e-07	3.5e-08	-21.6996	9.39747	-2.01071	PPP1R14B	protein phosphatase 1 regulatory subunit 14B	0.248151
axo04516-r_at	3.65e-07	1.26e-08	-24.8279	10.5159	-2.00278	NP	nucleoside phosphorylase	0.249519
axo18410-f_at	1.5e-07	3.14e-09	-29.7941	12.0185	-1.99272	HIF3A	hypoxia inducible factor 3, alpha subunit isoform b	0.251264
axo12956-f_at	1.32e-06	7.9e-08	-19.4924	8.50408	-1.98772	STAP1	signal transducing adaptor family member 1	0.252136
axo03358-f_at	2.17e-07	5.38e-09	-27.7573	11.4371	-1.98611	TJP2	tight junction protein 2 (zona occludens 2) isoform 2	0.252419
axo08264-f_at	2.22e-07	5.7e-09	-27.5481	11.3749	-1.97492	NCBP1	nuclear cap binding protein subunit 1, 80kDa	0.254383
axo21222-f_at	8.41e-06	9.44e-07	-14.0052	5.75551	-1.96903	BCL2L10	BCL2-like 10 (apoptosis facilitator)	0.255425
axo08309-f_at	3.11e-08	2.12e-10	-42.3636	14.8446	-1.96721	ODC1	ornithine decarboxylase 1	0.255747
axo17913-r_at	9.42e-08	1.44e-09	-33.0016	12.8519	-1.9664	KIAA1618	hypothetical protein LOC57714	0.25589
axo11120-f_at	7.98e-05	1.58e-05	-9.52348	2.61504	-1.9653	SMC4	SMC4 structural maintenance of chromosomes 4-like 1	0.256086
axo03003-f_at	1.09e-06	6.02e-08	-20.2035	8.80263	-1.96337	RNASE1	pancreatic ribonuclease precursor	0.256429
axo14871-f_at	5.79e-07	2.44e-08	-22.7584	9.7937	-1.96307	HAUS5	HAUS augmin-like complex, subunit 5	0.256482
axo09771-r_at	1.12e-07	1.99e-09	-31.6126	12.5024	-1.96064	F2RL2	coagulation factor II (thrombin) receptor-like 2 precursor	0.256914
axo05416-f_at	3.15e-06	2.6e-07	-16.6426	7.1874	-1.95661	TP63	tumor protein p63 isoform 4	0.257633
axo15284-f_at	1.12e-06	6.26e-08	-20.0999	8.75979	-1.9556	FCN2	ficolin 2 isoform b precursor	0.257814
axo07016-f_at	5.01e-07	2.02e-08	-23.337	10.0023	-1.95524	TYRP1	tyrosinase-related protein 1 precursor	0.257878
axo08744-f_at	2.37e-07	6.37e-09	-27.1532	11.2559	-1.95506	SDC4	syndecan 4 precursor	0.257909
axo11056-f_at	2.26e-07	5.85e-09	-27.4552	11.347	-1.95493	SHMT2	serine hydroxymethyltransferase 2 (mitochondrial)	0.257934
axo19400-f_at	1.78e-07	4.1e-09	-28.7698	11.7317	-1.95477		Z-DNA binding protein 1	0.257961
axo15616-f_at	2.06e-07	5.03e-09	-28.0035	11.5098	-1.95309	MAN1B1	alpha 1,2-mannosidase	0.258262
axo08016-f_at	3.22e-06	2.69e-07	-16.5689	7.15043	-1.95006	JUNB	jun B proto-oncogene	0.258805
axo15104-f_at	8.56e-08	1.16e-09	-33.9208	13.0744	-1.9489	MOXD1	monooxygenase, DBH-like 1 isoform 2	0.259014
axo10675-r_at	1.19e-07	2.2e-09	-31.2137	12.3989	-1.94457	NME4	nucleoside-diphosphate kinase 4	0.259792
axo11351-f_at	2.27e-07	5.91e-09	-27.4182	11.3359	-1.94419	CLEC3A	C-type lectin domain family 3 member A	0.259861
axo07820-f_at	8.85e-07	4.44e-08	-21.0351	9.13859	-1.94247	FOXO1	forkhead box O1	0.260171
axo01756-f_at	3.36e-07	1.12e-08	-25.2068	10.6414	-1.93764	FAM26D	hypothetical protein LOC221301	0.261043
axo10968-f_at	5.52e-05	1.01e-05	-10.1442	3.12055	-1.9357	HIST1H1B	histone cluster 1, H1b	0.261394
axo07788-f_at	1.19e-07	2.19e-09	-31.2199	12.4006	-1.93124	F3	coagulation factor III precursor	0.262204
axo06664-r_at	3.93e-08	3.16e-10	-40.2091	14.4343	-1.92753	MX1	myxovirus resistance protein 1	0.262878
axo19467-f_at	8.41e-07	4.13e-08	-21.2374	9.21828	-1.92513	ACSBG2	bubblegum related protein	0.263317
axo06005-r_at	5.02e-07	2.03e-08	-23.3228	9.99722	-1.92485	PLCXD2	phosphatidylinositol-specific phospholipase C, X domain containing 2 isoform a	0.263368
axo18226-f_at	1.42e-06	8.66e-08	-19.2556	8.4022	-1.92276	TEAD1	TEA domain family member 1	0.26375
axo19257-f_at	6.55e-08	7.6e-10	-35.8626	13.523	-1.92228	COQ10B	coenzyme Q10 homolog B	0.263837
axo15317-f_at	3.68e-08	2.68e-10	-41.0943	14.6059	-1.91691	UMOD	uromodulin precursor	0.264821
axo10238-r_at	9.99e-07	5.28e-08	-20.5558	8.94663	-1.9145	PSPH	phosphoserine phosphatase	0.265265
axo20225-f_at	9.4e-07	4.84e-08	-20.7943	9.0427	-1.91185	SYTL2	synaptotagmin-like 2 isoform a	0.265752
axo11505-f_at	1.5e-07	3.17e-09	-29.7508	12.0067	-1.91163	MAT2A	methionine adenosyltransferase II, alpha	0.265793
axo02706-f_at	1.09e-06	6.02e-08	-20.2057	8.80352	-1.90908	FAM55B	hypothetical protein LOC120406	0.266263
axo17442-r_at	4.12e-07	1.51e-08	-24.2518	10.3213	-1.89675	KIF15	kinesin family member 15	0.268547
axo01062-f_at	2.21e-07	5.65e-09	-27.5848	11.3858	-1.88636	OTOA	otoancorin isoform 1	0.270489
axo08986-f_at	9.71e-08	1.55e-09	-32.667	12.7692	-1.88603	TK1	thymidine kinase 1	0.27055
axo18492-f_at	1.67e-06	1.1e-07	-18.6558	8.13851	-1.88298	NUCKS1	nuclear casein kinase and cyclin-dependent kinase substrate 1	0.271124
axo07477-f_at	1.44e-07	2.93e-09	-30.0538	12.0896	-1.88157	ARL4D	ADP-ribosylation factor-like 4D	0.271389
axo05362-f_at	3.84e-08	3.05e-10	-40.3908	14.4699	-1.8798	TGM1	transglutaminase 1	0.271721
axo12914-f_at	3.73e-07	1.32e-08	-24.6653	10.4615	-1.87821	TARDBP	TAR DNA binding protein	0.272022
axo18635-r_at	1.18e-06	6.67e-08	-19.9318	8.68984	-1.8751	SIGLEC1	sialoadhesin precursor	0.272608
axo08122-f_s_at	4.93e-08	4.77e-10	-38.1127	14.0096	-1.86958	EPCAM	epithelial cell adhesion molecule precursor	0.273652
axo11122-f_at	7.54e-06	8.13e-07	-14.2885	5.92116	-1.86289	SMC4	SMC4 structural maintenance of chromosomes 4-like 1	0.274926
axo19668-f_at	4.96e-07	1.98e-08	-23.3888	10.0207	-1.85591	PRSS27	marapsin	0.276258
axo16149-f_at	1.04e-05	1.25e-06	-13.4905	5.44621	-1.85568	DNASE1L1	deoxyribonuclease I-like 1 precursor	0.276303
axo16793-f_at	1.13e-05	1.39e-06	-13.2939	5.32513	-1.85304	PRR11	proline rich 11	0.276808
axo07930-r_at	6.25e-05	1.17e-05	-9.93226	2.95101	-1.85133	RBMX	RNA binding motif protein, X-linked	0.277137
axo02180-f_at	1.92e-06	1.34e-07	-18.1787	7.92259	-1.85074	WARS	tryptophanyl-tRNA synthetase isoform a	0.27725
axo07445-f_at	1.37e-07	2.74e-09	-30.3273	12.1637	-1.84923	ALCAM	activated leukocyte cell adhesion molecule	0.277541
axo15663-f_at	7.09e-08	8.72e-10	-35.22	13.3776	-1.84581	KLF2	Kruppel-like factor	0.2782
axo00847-r_at	5.45e-06	5.35e-07	-15.1142	6.38682	-1.8438	CANT1	calcium activated nucleotidase 1	0.278588
axo01573-f_at	7.75e-07	3.72e-08	-21.5315	9.33275	-1.82969	TTC39B	tetratricopeptide repeat domain 39B	0.281325
axo12288-f_at	2.34e-07	6.22e-09	-27.2393	11.282	-1.82607	STARD10	START domain containing 10	0.282031
axo16047-f_at	9.23e-07	4.72e-08	-20.862	9.06978	-1.82467	PARP14	poly (ADP-ribose) polymerase family, member 14	0.282305
axo11975-r_at	1.27e-06	7.49e-08	-19.6285	8.56203	-1.82337	RBM14	RNA binding motif protein 14	0.282561
axo17093-f_at	1.25e-06	7.29e-08	-19.6984	8.59169	-1.82213	ERRFI1	mitogen-inducible gene 6 protein	0.282803
axo08136-f_at	8.84e-08	1.23e-09	-33.6644	13.013	-1.819	MAL	T-lymphocyte maturation-associated protein isoform a	0.283418
axo07530-f_at	6.7e-07	2.99e-08	-22.1611	9.57256	-1.81398	BNC1	basonuclin 1	0.284405
axo08760-f_at	8.84e-08	1.25e-09	-33.6039	12.9985	-1.80664	SFRS2	splicing factor, arginine/serine-rich 2	0.285857
axo11717-f_at	4e-05	6.78e-06	-10.7133	3.56081	-1.80459	NDC80	kinetochore associated 2	0.286263
axo10156-f_at	1.28e-07	2.43e-09	-30.8098	12.2927	-1.79382	ILF2	interleukin enhancer binding factor 2	0.288408
axo12842-r_at	6.14e-07	2.65e-08	-22.5089	9.70206	-1.79299	EMD	emerin	0.288574
axo07927-f_at	2.57e-07	7.29e-09	-26.6765	11.1098	-1.78683	HMGCS1	hydroxymethylglutaryl-CoA synthase 1	0.289807
axo11025-f_at	6.74e-08	8.06e-10	-35.587	13.461	-1.78448	NFIL3	nuclear factor, interleukin 3 regulated	0.29028
axo09084-f_at	5.8e-08	6.29e-10	-36.7605	13.7212	-1.78431	UGDH	UDP-glucose dehydrogenase	0.290315
axo02983-f_at	7.23e-07	3.36e-08	-21.8221	9.44431	-1.77425	SHISA4	shisa homolog 4	0.292345
axo09941-f_at	3.3e-07	1.09e-08	-25.3038	10.6731	-1.77305	POLR2B	DNA directed RNA polymerase II polypeptide B	0.292589
axo19808-f_at	7.9e-07	3.83e-08	-21.4441	9.29893	-1.77168	FAR1	fatty acyl CoA reductase 1	0.292867
axo01959-r_at	2.92e-07	9.03e-09	-25.9358	10.8772	-1.77154	TRIM39	tripartite motif-containing 39 isoform 2	0.292897
axo17028-f_at	1.08e-07	1.85e-09	-31.9306	12.5839	-1.76686	CMAS	cytidine 5'-monophosphate N-acetylneuraminic acid synthetase	0.293848
axo14156-f_at	1.07e-06	5.81e-08	-20.2993	8.84204	-1.76641	LBA1	lupus brain antigen 1	0.293939
axo13660-f_at	7.09e-08	8.69e-10	-35.2358	13.3812	-1.76585	HEBP2	heme binding protein 2	0.294053
axo17097-r_at	8.98e-08	1.31e-09	-33.3825	12.9449	-1.75861	UBB	ubiquitin B precursor	0.295534
axo12159-f_at	2.27e-07	5.88e-09	-27.4382	11.3419	-1.75749	SLC2A1	solute carrier family 2 (facilitated glucose transporter), member 1	0.295761
axo16183-f_at	0.000115	2.46e-05	-8.95502	2.12679	-1.74784	BSPRY	B-box and SPRY domain containing	0.297747
axo12580-f_at	2.16e-06	1.58e-07	-17.7879	7.74157	-1.74563	UPK3A	uroplakin 3A precursor	0.298203
axo15313-f_at	2.95e-07	9.21e-09	-25.8702	10.8563	-1.74396	UMOD	uromodulin precursor	0.29855
axo12059-f_at	1.42e-06	8.7e-08	-19.2433	8.39689	-1.7429	SPTLC1	serine palmitoyltransferase subunit 1 isoform a	0.298769
axo06142-f_at	4e-06	3.59e-07	-15.9428	6.83007	-1.74289	MUC15	mucin 15 isoform a	0.298771
axo03050-f_at	1.68e-07	3.71e-09	-29.1411	11.8369	-1.7418	AURKA	serine/threonine protein kinase 6	0.298997
axo02936-r_at	5.57e-07	2.32e-08	-22.9149	9.85065	-1.74073	LBR	lamin B receptor	0.299219
axo18772-f_at	6.79e-06	7.08e-07	-14.5564	6.075	-1.73839	DSC3	desmocollin 3 isoform Dsc3b preproprotein	0.299704
axo19585-f_at	2.34e-07	6.2e-09	-27.2487	11.2848	-1.73706	RTP3	transmembrane protein 7	0.299981
axo06643-f_at	9.23e-07	4.73e-08	-20.8595	9.0688	-1.73112	CCNL2	cyclin L2 isoform D	0.301218
axo09387-f_at	3.72e-07	1.3e-08	-24.7161	10.4786	-1.73098	KHSRP	KH-type splicing regulatory protein (FUSE binding protein 2)	0.301248
axo08502-f_at	9.54e-08	1.48e-09	-32.8637	12.818	-1.72937	HTRA1	HtrA serine peptidase 1 precursor	0.301584
axo16109-f_at	1.06e-05	1.28e-06	-13.443	5.41713	-1.72876	FAM46A	hypothetical protein LOC55603	0.301711
axo20242-f_at	6.37e-07	2.78e-08	-22.3682	9.64993	-1.72367	SEC23B	Sec23 homolog B	0.302777
axo18755-f_at	5.65e-06	5.62e-07	-15.0151	6.33223	-1.72358	EFHD2	EF-hand domain family, member D2	0.302797
axo08265-f_at	1.25e-05	1.58e-06	-13.0699	5.18508	-1.72247	NCBP1	nuclear cap binding protein subunit 1, 80kDa	0.303028
axo05883-r_at	4.49e-07	1.72e-08	-23.8319	10.1765	-1.7224	ELOVL6	elongation of very long chain fatty acids-like 6	0.303044
axo07001-f_at	3.15e-06	2.6e-07	-16.6382	7.1852	-1.72088	BMP2	bone morphogenetic protein 2 preproprotein	0.303364
axo11674-r_at	8.73e-07	4.36e-08	-21.0859	9.15868	-1.71772	MED11	mediator complex subunit 11	0.304029
axo04537-f_at	1.02e-06	5.39e-08	-20.5003	8.92413	-1.71666	HNRNPC	heterogeneous nuclear ribonucleoprotein C isoform b	0.304253
axo12253-f_at	8.84e-08	1.27e-09	-33.5387	12.9827	-1.71009	EPSTI1	epithelial stromal interaction 1 isoform 1	0.305642
axo06031-f_at	9.06e-08	1.33e-09	-33.3155	12.9287	-1.7092	KRT5	keratin 5	0.305831
axo21176-f_at	3.85e-06	3.4e-07	-16.0593	6.89061	-1.70805	ASF1B	anti-silencing function 1B	0.306072
axo20227-f_at	1.89e-06	1.3e-07	-18.2413	7.95126	-1.70635	SYTL2	synaptotagmin-like 2 isoform a	0.306434
axo20007-f_at	5.85e-07	2.47e-08	-22.7196	9.77951	-1.69789	NT5C1A	5'-nucleotidase, cytosolic IA	0.308236
axo11634-f_at	9.61e-08	1.52e-09	-32.7648	12.7935	-1.69474	P11	placental protein 11 precursor	0.308911
axo09083-r_at	6.32e-08	7.24e-10	-36.0864	13.5729	-1.69333	UGCG	ceramide glucosyltransferase	0.309212
axo05611-f_at	4.83e-07	1.9e-08	-23.5193	10.0669	-1.69205	BLMH	bleomycin hydrolase	0.309487
axo20694-f_at	6.78e-07	3.06e-08	-22.0959	9.54806	-1.69096	UMOD	uromodulin precursor	0.309721
axo11082-f_at	7.86e-08	1.01e-09	-34.5327	13.2188	-1.6906	MALL	mal, T-cell differentiation protein-like	0.309797
axo05801-f_at	9.86e-07	5.2e-08	-20.6007	8.96479	-1.68898	MOV10	Mov10, Moloney leukemia virus 10, homolog	0.310146
axo17089-f_at	1.66e-07	3.65e-09	-29.2032	11.8544	-1.68732	NANS	N-acetylneuraminic acid phosphate synthase	0.310503
axo17115-f_at	4.66e-06	4.34e-07	-15.5405	6.61773	-1.68543	SLC38A2	solute carrier family 38, member 2	0.310909
axo15548-f_at	2.82e-06	2.22e-07	-16.9967	7.36264	-1.68379	COPG	coatomer protein complex, subunit gamma 1	0.311264
axo11126-f_at	2.54e-06	1.94e-07	-17.3047	7.51216	-1.68037	SAE1	SUMO1 activating enzyme subunit 1 isoform a	0.312004
axo09348-f_at	7.55e-07	3.57e-08	-21.644	9.37612	-1.67535	GCM1	glial cells missing homolog a	0.31309
axo00820-f_at	8.84e-08	1.27e-09	-33.5206	12.9784	-1.67412		BCL2-associated X protein isoform epsilon	0.313358
axo09856-f_at	1.5e-07	3.17e-09	-29.7514	12.0068	-1.6735	AURKB	aurora kinase B	0.313492
axo03275-f_at	6.12e-07	2.63e-08	-22.5362	9.71215	-1.66997	TPD52L2	tumor protein D52-like 2 isoform c	0.31426
axo03054-f_at	6.03e-07	2.57e-08	-22.6004	9.73578	-1.66972	PDE4B	phosphodiesterase 4B, cAMP-specific isoform 1	0.314314
axo20707-f_at	9.07e-06	1.04e-06	-13.8181	5.64435	-1.66443	RRP1	ribosomal RNA processing 1 homolog	0.315468
axo08259-f_s_at	6.41e-07	2.81e-08	-22.3391	9.6391	-1.66256	NASP	nuclear autoantigenic sperm protein isoform 2	0.315877
axo07719-f_at	7.09e-08	8.69e-10	-35.2399	13.3821	-1.66229	GADD45A	growth arrest and DNA-damage-inducible, alpha	0.315938
axo08761-f_s_at	7.53e-08	9.49e-10	-34.834	13.2889	-1.65972	SFRS2	splicing factor, arginine/serine-rich 2	0.3165
axo19795-f_at	9.41e-07	4.85e-08	-20.7889	9.04056	-1.65883	MFSD7	major facilitator superfamily domain containing 7	0.316696
axo10260-f_at	0.000492	0.000139	-6.97645	0.20333	-1.65733	PTGS2	prostaglandin-endoperoxide synthase 2 precursor	0.317026
axo07640-f_at	7.03e-05	1.35e-05	-9.73362	2.78926	-1.65532	COL2A1	collagen, type II, alpha 1 isoform 1 precursor	0.317468
axo06314-f_at	1.05e-06	5.64e-08	-20.3808	8.8754	-1.65497	FZR1	Fzr1 protein isoform 1	0.317545
axo02782-f_at	1.05e-07	1.75e-09	-32.1681	12.6442	-1.65362	MACC1	putative binding protein 7a5	0.317841
axo07048-f_at	1.05e-07	1.75e-09	-32.1573	12.6415	-1.65327	CDC20	cell division cycle 20	0.317919
axo12999-f_at	1.74e-06	1.16e-07	-18.5319	8.08294	-1.65325	FBXO5	F-box only protein 5 isoform a	0.317923
axo10248-f_at	4.67e-06	4.36e-07	-15.5341	6.61429	-1.64485	RPS6KA3	ribosomal protein S6 kinase, 90kDa, polypeptide 3	0.31978
axo11392-f_at	2.94e-05	4.63e-06	-11.29	3.98625	-1.64459	TNK2	tyrosine kinase, non-receptor, 2 isoform 1	0.319838
axo10348-f_at	1.29e-06	7.65e-08	-19.5761	8.53978	-1.64328	ATP6V0D1	ATPase, H+ transporting, lysosomal, V0 subunit d1	0.320129
axo17504-f_at	1.98e-07	4.76e-09	-28.2067	11.5693	-1.64298	COL8A1	alpha 1 type VIII collagen precursor	0.320193
axo21419-f_s_at	0.000111	2.35e-05	-9.0116	2.17653	-1.64102	RHEBL1	Ras homolog enriched in brain like 1	0.320631
axo19870-r_at	4.19e-07	1.54e-08	-24.1751	10.2951	-1.63847	BTBD10	K+ channel tetramerization protein	0.321198
axo12608-f_at	1.69e-06	1.12e-07	-18.6121	8.11897	-1.63827	NPM3	nucleophosmin/nucleoplasmin 3	0.321241
axo12961-f_at	3.48e-07	1.18e-08	-25.0414	10.5868	-1.63806	TPX2	TPX2, microtubule-associated protein homolog	0.321289
axo04425-f_at	8e-08	1.06e-09	-34.3348	13.1724	-1.63799	SLC7A3	solute carrier family 7 (cationic amino acid transporter, y+ system), member 3	0.321303
axo03281-f_at	4.08e-06	3.68e-07	-15.8883	6.80163	-1.63771	PRC1	protein regulator of cytokinesis 1 isoform 3	0.321366
axo19900-f_at	1.35e-07	2.69e-09	-30.3959	12.1822	-1.63747	FBLIM1	filamin-binding LIM protein-1 isoform c	0.321419
axo00906-f_at	1.13e-07	2.03e-09	-31.5426	12.4844	-1.63564	CSNK1D	casein kinase 1, delta isoform 2	0.321827
axo03515-r_at	2.77e-05	4.3e-06	-11.4025	4.06696	-1.63319	EXT2	exostosin 2 isoform 2	0.322375
axo05645-r_at	1.38e-07	2.78e-09	-30.2743	12.1494	-1.63117	MMP2	matrix metalloproteinase 2 isoform b	0.322826
axo00020-f_at	3.18e-07	1.02e-08	-25.5299	10.7468	-1.6295	CASP7	caspase 7 isoform delta	0.3232
axo04267-r_at	4.86e-07	1.92e-08	-23.4917	10.0571	-1.6259	INCENP	inner centromere protein antigens 135/155kDa isoform 1	0.324007
axo10356-f_at	6.14e-07	2.65e-08	-22.5098	9.7024	-1.62335	SLC16A6	solute carrier family 16, member 6	0.324581
axo07610-f_at	2.79e-07	8.45e-09	-26.1634	10.9494	-1.62282	CENPA	centromere protein A isoform a	0.324701
axo04561-f_at	4.99e-06	4.74e-07	-15.3594	6.52037	-1.62237	SFRS1	splicing factor, arginine/serine-rich 1 isoform 2	0.324801
axo18296-f_at	5.89e-06	5.94e-07	-14.9041	6.27067	-1.61971	TNN	tenascin N	0.325402
axo18652-f_at	1.35e-06	8.12e-08	-19.4218	8.47384	-1.61911	GPR87	G protein-coupled receptor 87	0.325536
axo05497-f_at	6.76e-07	3.03e-08	-22.1196	9.55698	-1.61605	LNX1	ligand of numb-protein X 1 isoform a	0.326227
axo10224-f_at	2.47e-07	6.8e-09	-26.9224	11.1855	-1.61027	PCK2	mitochondrial phosphoenolpyruvate carboxykinase 2 isoform 1 precursor	0.327537
axo07545-f_at	1.15e-05	1.42e-06	-13.2549	5.30091	-1.61006	KLF5	Kruppel-like factor 5	0.327585
axo17350-f_at	4.8e-06	4.53e-07	-15.4543	6.57153	-1.60862	TM9SF3	transmembrane 9 superfamily member 3	0.327913
axo00173-f_at	1.08e-06	5.9e-08	-20.2569	8.82462	-1.60756	PLEKHG4B	pleckstrin homology domain containing, family G (with RhoGef domain) member 4B	0.328153
axo01727-r_at	1.41e-07	2.84e-09	-30.177	12.1231	-1.60744	CPNE1	copine I isoform a	0.328181
axo19587-f_at	4.84e-07	1.91e-08	-23.5087	10.0631	-1.60717	RTP3	transmembrane protein 7	0.328241
axo10165-f_at	1.38e-07	2.76e-09	-30.3008	12.1566	-1.60526	KIF11	kinesin family member 11	0.328677
axo04187-r_at	9.74e-08	1.56e-09	-32.6391	12.7623	-1.60467	FAM3C	family with sequence similarity 3, member C precursor	0.328811
axo08619-f_at	7.62e-08	9.68e-10	-34.7436	13.2679	-1.60254	CYP2C8	cytochrome P450, family 2, subfamily C, polypeptide 8	0.329298
axo03392-f_at	3.61e-07	1.24e-08	-24.8729	10.531	-1.60084	ZRANB2	zinc finger protein 265 isoform 1	0.329684
axo12755-f_at	5.76e-07	2.41e-08	-22.7965	9.8076	-1.59959	PKP3	plakophilin 3	0.329971
axo13707-f_at	1.72e-07	3.87e-09	-28.9871	11.7934	-1.59845	SACS	sacsin	0.330231
axo01992-f_at	1.36e-05	1.76e-06	-12.8734	5.06043	-1.59823	CAMK2D	calcium/calmodulin-dependent protein kinase II delta isoform 4	0.330282
axo07687-r_at	2.27e-07	5.91e-09	-27.418	11.3359	-1.59805	CSNK1A1	casein kinase 1, alpha 1 isoform 2	0.330324
axo10051-f_at	5.49e-06	5.41e-07	-15.0912	6.37414	-1.59707	DUSP1	dual specificity phosphatase 1	0.330547
axo06760-f_at	4.44e-07	1.7e-08	-23.8744	10.1913	-1.59673	LRTOMT	leucine rich transmembrane and 0-methyltransferase domain containing isoform 6	0.330625
axo08608-f_at	1.35e-07	2.69e-09	-30.4047	12.1845	-1.59368	ALDH18A1	pyrroline-5-carboxylate synthetase isoform 1	0.331325
axo10867-r_at	2.79e-06	2.19e-07	-17.0232	7.37561	-1.59351	CAPN1	calpain 1, large subunit	0.331364
axo13132-r_at	1.72e-07	3.89e-09	-28.9611	11.7861	-1.59343	DNAJB9	DnaJ (Hsp40) homolog, subfamily B, member 9	0.331382
axo18348-f_at	2.83e-06	2.24e-07	-16.9801	7.35447	-1.59335	RRAGC	Ras-related GTP binding C	0.3314
axo06887-f_at	6.69e-07	2.98e-08	-22.1671	9.57481	-1.59207	PARP9	poly (ADP-ribose) polymerase family, member 9 isoform c	0.331696
axo05399-f_at	3.21e-05	5.17e-06	-11.118	3.86144	-1.59206	ELF3	E74-like factor 3 (ets domain transcription factor, epithelial-specific )	0.331697
axo16338-r_at	5.57e-07	2.31e-08	-22.921	9.85286	-1.59093	C4orf27	hypothetical protein LOC54969	0.331958
axo00028-f_at	2.36e-07	6.34e-09	-27.1705	11.2611	-1.58856	COL4A5	type IV collagen alpha 5 isoform 2 precursor	0.332504
axo17557-f_at	1.02e-06	5.43e-08	-20.4795	8.91564	-1.58628	SALL4	sal-like 4	0.333028
axo05214-f_at	1.23e-07	2.32e-09	-30.9991	12.3427	-1.58608	ELOVL7	elongation of very long chain fatty acids-like 7	0.333076
axo11399-f_at	2.26e-06	1.67e-07	-17.6491	7.67628	-1.58557	PRMT3	protein arginine methyltransferase 3 isoform 1	0.333193
axo00841-r_at	1.05e-07	1.76e-09	-32.1333	12.6354	-1.58524	TMEM45B	transmembrane protein 45B	0.333268
axo17184-f_at	2.92e-07	8.99e-09	-25.9506	10.8819	-1.58381	RHOF	ras homolog gene family, member F	0.333601
axo12434-f_at	3.19e-07	1.03e-08	-25.5007	10.7373	-1.58335	KDELR1	KDEL (Lys-Asp-Glu-Leu) endoplasmic reticulum protein retention receptor 1	0.333706
axo01703-f_at	2.88e-06	2.31e-07	-16.9078	7.31894	-1.58253	SP7	osterix	0.333895
axo09016-f_at	6.33e-06	6.49e-07	-14.727	6.17156	-1.58029	TPD52L2	tumor protein D52-like 2 isoform e	0.334415
axo08726-f_at	2.57e-07	7.26e-09	-26.6896	11.1138	-1.58008	MAPK12	mitogen-activated protein kinase 12	0.334463
axo06028-r_at	7.02e-06	7.38e-07	-14.4749	6.0285	-1.58004	KRT5	keratin 5	0.334473
axo06992-f_at	7.72e-06	8.4e-07	-14.2266	5.88523	-1.57906	ATP6AP1	ATPase, H+ transporting, lysosomal accessory protein 1 precursor	0.3347
axo02567-r_at	0.000129	2.84e-05	-8.77443	1.96623	-1.57884	IL22RA2	interleukin 22-binding protein isoform 2	0.334752
axo19682-f_s_at	2.38e-07	6.41e-09	-27.1286	11.2484	-1.57858	CCNB1	cyclin B1	0.33481
axo18737-f_at	2.77e-07	8.33e-09	-26.2147	10.9656	-1.57624	GDPD3	glycerophosphodiester phosphodiesterase domain containing 3	0.335356
axo12982-f_at	2.77e-06	2.17e-07	-17.0439	7.38572	-1.57354	LPAR3	lysophosphatidic acid receptor 3	0.335982
axo18360-f_at	3.5e-06	3.01e-07	-16.3228	7.02594	-1.57263	EIF4H	eukaryotic translation initiation factor 4H isoform 1	0.336196
axo01987-f_at	6.89e-07	3.13e-08	-22.0274	9.52222	-1.57193	EYA2	eyes absent 2 isoform b	0.336358
axo09768-f_at	1.91e-06	1.32e-07	-18.2065	7.93536	-1.57165	EMX2	empty spiracles homeobox 2	0.336422
axo10912-f_at	1.85e-07	4.37e-09	-28.5222	11.6607	-1.56935	F2RL1	coagulation factor II (thrombin) receptor-like 1 precursor	0.336959
axo00013-f_at	8.48e-07	4.17e-08	-21.2096	9.20737	-1.56815	CASP1	caspase 1 isoform gamma precursor	0.33724
axo19112-f_at	2.92e-07	8.98e-09	-25.957	10.884	-1.56718	POF1B	premature ovarian failure, 1B	0.337468
axo10354-f_at	5.08e-07	2.05e-08	-23.2876	9.98467	-1.56494	SLC16A6	solute carrier family 16, member 6	0.337992
axo19386-f_at	1.37e-06	8.28e-08	-19.3697	8.45144	-1.56451	SERPINB1	serine (or cysteine) proteinase inhibitor, clade B (ovalbumin), member 1	0.338092
axo16010-f_at	1.21e-06	6.93e-08	-19.8319	8.64795	-1.56252	XAF1	XIAP associated factor 1 isoform 1	0.338558
axo19415-f_at	1.08e-06	5.89e-08	-20.2636	8.82737	-1.56234	ITFG1	integrin alpha FG-GAP repeat containing 1	0.338601
axo19107-r_at	1.62e-07	3.5e-09	-29.3732	11.902	-1.55633	ERMAP	erythroblast membrane-associated protein precursor	0.340016
axo01790-f_at	3.08e-06	2.52e-07	-16.712	7.22201	-1.55495	C10orf47	hypothetical protein LOC254427	0.340339
axo03393-f_at	2.2e-07	5.53e-09	-27.6572	11.4074	-1.55446	PDLIM7	PDZ and LIM domain 7 isoform 2	0.340456
axo00064-r_x_at	9.41e-08	1.42e-09	-33.0402	12.8614	-1.55178	KRT71	keratin 71	0.34109
axo09989-f_at	3e-07	9.45e-09	-25.784	10.8287	-1.55158	CDH1	cadherin 1, type 1 preproprotein	0.341136
axo05417-f_at	2.79e-06	2.19e-07	-17.025	7.37649	-1.55002	TP63	tumor protein p63 isoform 6	0.341506
axo04164-f_at	6.65e-05	1.27e-05	-9.8248	2.86386	-1.54982	CCNI2	cyclin I family, member 2	0.341554
axo11504-r_at	8.36e-06	9.33e-07	-14.0278	5.76886	-1.54825	MAT2A	methionine adenosyltransferase II, alpha	0.341925
axo03324-f_at	1.57e-06	1.01e-07	-18.8659	8.23183	-1.54753	MARVELD2	MARVEL domain containing 2 isoform 1	0.342096
axo00180-f_at	4.78e-07	1.88e-08	-23.5564	10.08	-1.54645	HK2	hexokinase 2	0.342352
axo08789-f_at	3.84e-06	3.39e-07	-16.0656	6.89386	-1.54524	SLC9A2	solute carrier family 9 (sodium/hydrogen exchanger), member 2	0.342638
axo19403-f_at	6.48e-05	1.22e-05	-9.8716	2.90192	-1.54521	SLC25A32	solute carrier family 25, member 32	0.342645
axo05833-f_at	6.54e-07	2.9e-08	-22.2512	9.60631	-1.54493	G6PD	glucose-6-phosphate dehydrogenase isoform a	0.342711
axo05294-f_at	2.67e-05	4.12e-06	-11.4706	4.11547	-1.54283	FLNA	filamin A, alpha isoform 2	0.343213
axo05712-r_at	0.00066	0.000196	-6.62497	-0.18084	-1.54242	SMARCAD1	SWI/SNF-related, matrix-associated actin-dependent regulator of chromatin, subfamily a, containing DEAD/H box 1 isoform a	0.343308
axo13024-r_s_at	1.65e-07	3.6e-09	-29.2604	11.8704	-1.53503	HNRNPH3	heterogeneous nuclear ribonucleoprotein H3 isoform a	0.345073
axo13409-f_at	2.34e-07	6.13e-09	-27.2865	11.2962	-1.53477	MKRN1	makorin ring finger protein 1 isoform 1	0.345134
axo00325-r_at	7.2e-07	3.33e-08	-21.8444	9.45282	-1.53386	PUF60	poly-U binding splicing factor 60KDa isoform a	0.345353
axo08808-f_at	2.06e-07	5.02e-09	-28.0146	11.513	-1.53362	HLTF	helicase-like transcription factor	0.345409
axo21473-f_at	7.06e-07	3.23e-08	-21.9326	9.48635	-1.53314	PDLIM2	PDZ and LIM domain 2 isoform 3	0.345525
axo12802-r_at	2.74e-07	8.12e-09	-26.2999	10.9924	-1.53243	PACSIN2	protein kinase C and casein kinase substrate in neurons 2	0.345694
axo08967-f_at	2.7e-07	7.96e-09	-26.3705	11.0145	-1.53182	THBS1	thrombospondin 1 precursor	0.345842
axo08276-r_at	1.1e-05	1.34e-06	-13.362	5.36728	-1.52912	NEK2	NIMA-related kinase 2	0.346489
axo18504-f_at	9.23e-06	1.07e-06	-13.7741	5.61797	-1.5291	SMYD3	SET and MYND domain containing 3	0.346493
axo07100-f_at	9.61e-08	1.52e-09	-32.7613	12.7927	-1.52864	CLDN7	claudin 7	0.346603
axo07055-f_at	1.27e-06	7.4e-08	-19.6613	8.57596	-1.52775	CDS1	CDP-diacylglycerol synthase 1	0.346817
axo15318-f_at	1.43e-06	8.73e-08	-19.235	8.39331	-1.52759	UMOD	uromodulin precursor	0.346857
axo06027-f_x_at	2.56e-07	7.13e-09	-26.7518	11.1331	-1.5231	KRT5	keratin 5	0.347936
axo16150-f_at	9.69e-08	1.54e-09	-32.6856	12.7739	-1.52031	FERMT1	kindlin-1	0.348611
axo11068-f_at	2.04e-06	1.45e-07	-17.9836	7.83269	-1.51928	TECTA	tectorin alpha precursor	0.34886
axo08184-f_at	8.3e-05	1.66e-05	-9.45792	2.56001	-1.51911	MMP10	matrix metalloproteinase 10 preproprotein	0.3489
axo08500-r_at	1.14e-06	6.39e-08	-20.0468	8.73774	-1.51902	CHMP1A	chromatin modifying protein 1A isoform 2	0.348924
axo08747-f_at	3.99e-06	3.58e-07	-15.9467	6.83209	-1.51588	DCK	deoxycytidine kinase	0.349684
axo07521-r_at	1.69e-06	1.11e-07	-18.6282	8.12615	-1.51377	BCL6	B-cell lymphoma 6 protein isoform 1	0.350194
axo15875-f_at	1.32e-05	1.69e-06	-12.9422	5.10427	-1.51349	TLR7	toll-like receptor 7	0.350262
axo11422-r_at	1.46e-06	9.04e-08	-19.1471	8.35511	-1.50858	GPA33	transmembrane glycoprotein A33 precursor	0.351456
axo11513-f_at	9.57e-06	1.12e-06	-13.6924	5.56883	-1.50845	MCM4	minichromosome maintenance complex component 4	0.35149
axo07375-f_at	1.12e-07	2e-09	-31.6034	12.5001	-1.50496	CYR61	cysteine-rich, angiogenic inducer, 61	0.35234
axo08156-r_at	2.88e-06	2.3e-07	-16.9186	7.32427	-1.50465	MDM2	mouse double minute 2 homolog isoform MDM2	0.352417
axo12926-r_at	0.00381	0.00151	-4.79938	-2.42803	-1.50086	ELL2	elongation factor, RNA polymerase II, 2	0.353343
axo15308-f_at	1.04e-07	1.73e-09	-32.2151	12.6561	-1.5	UMOD	uromodulin precursor	0.353552
axo06308-r_at	1.95e-06	1.36e-07	-18.1338	7.90203	-1.49828	LOC440498	heat shock factor binding protein 1-like	0.353975
axo00389-f_at	2.69e-07	7.88e-09	-26.4029	11.0247	-1.4933	ACY3	aspartoacylase (aminocyclase) 3	0.355198
axo01403-f_at	3.66e-07	1.27e-08	-24.8082	10.5094	-1.49216	RPUSD2	RNA pseudouridylate synthase domain containing 2	0.355479
axo12035-f_at	1.71e-07	3.82e-09	-29.0359	11.8073	-1.49168	RNASEH2A	ribonuclease H2, large subunit	0.355599
axo01101-f_at	5.02e-06	4.78e-07	-15.3422	6.51104	-1.49103	IL20RB	interleukin 20 receptor beta precursor	0.355759
axo17661-r_at	3.26e-06	2.74e-07	-16.5286	7.13021	-1.48827	RIMKLB	ribosomal modification protein rimK-like family member B	0.356441
axo16808-f_at	1.35e-05	1.75e-06	-12.884	5.06716	-1.48706	PI4K2B	phosphatidylinositol 4-kinase type 2 beta	0.356738
axo05780-f_at	1.67e-07	3.69e-09	-29.1651	11.8437	-1.48519	FAM115C	hypothetical protein LOC285966 A	0.357203
axo07323-f_at	6.54e-07	2.89e-08	-22.2612	9.61005	-1.48476	B4GALT1	UDP-Gal:betaGlcNAc beta 1,4- galactosyltransferase 1, membrane-bound form	0.357307
axo11671-f_at	1.05e-06	5.68e-08	-20.3583	8.86623	-1.48445	TNIP1	TNFAIP3 interacting protein 1	0.357385
axo00253-r_at	7.2e-07	3.34e-08	-21.8408	9.45146	-1.48388	VIT	vitrin	0.357525
axo18944-f_at	9.73e-07	5.1e-08	-20.6545	8.98654	-1.48316	VPS37B	vacuolar protein sorting 37B	0.357704
axo08889-f_at	1.94e-05	2.77e-06	-12.1071	4.55665	-1.48178	STAT5A	signal transducer and activator of transcription 5A	0.358046
axo21372-f_x_at	1.5e-07	3.14e-09	-29.7944	12.0186	-1.47673	KRT2	keratin 2	0.359302
axo12663-r_at	2.5e-07	6.95e-09	-26.8406	11.1604	-1.47546	ZWINT	ZW10 interactor isoform a	0.359617
axo05823-f_at	2.25e-07	5.79e-09	-27.4914	11.3579	-1.4744	VWA5A	BCSC-1 isoform 1	0.359884
axo09600-f_at	4.98e-07	2e-08	-23.3681	10.0133	-1.47202	FCGBP	Fc fragment of IgG binding protein	0.360476
axo10701-f_at	4.49e-07	1.73e-08	-23.8193	10.1721	-1.47064	PLK1	polo-like kinase 1	0.360822
axo11241-f_at	5.14e-07	2.08e-08	-23.2369	9.96655	-1.47045	SGK1	serum/glucocorticoid regulated kinase 1 isoform 1	0.360869
axo07536-f_at	5.51e-06	5.44e-07	-15.0786	6.3672	-1.46939	DST	dystonin isoform 1e precursor	0.361135
axo21474-f_at	3.77e-05	6.3e-06	-10.8201	3.64114	-1.46939	RAB7B	RAB7B, member RAS oncogene family	0.361136
axo02497-f_at	5.16e-07	2.1e-08	-23.2123	9.95777	-1.46796	NOP2	nucleolar protein 1, 120kDa	0.361493
axo04877-f_at	6.54e-07	2.9e-08	-22.2479	9.60509	-1.46704	PMM2	phosphomannomutase 2	0.361722
axo12161-f_s_at	8e-05	1.59e-05	-9.519	2.61129	-1.46682	SLC2A1	solute carrier family 2 (facilitated glucose transporter), member 1	0.361779
axo09379-r_at	4.3e-07	1.61e-08	-24.0407	10.2488	-1.46672	YARS	tyrosyl-tRNA synthetase	0.361805
axo12916-f_at	3.28e-07	1.07e-08	-25.3599	10.6915	-1.46587	ATF5	activating transcription factor 5	0.362017
axo01483-f_at	3.13e-06	2.57e-07	-16.6653	7.19873	-1.46523	MRI1	translation initiation factor eIF-2B subunit alpha/beta/delta-like protein isoform 1	0.362178
axo07070-f_at	3.72e-07	1.3e-08	-24.7213	10.4803	-1.46441	CHKA	choline kinase alpha isoform a	0.362383
axo21204-f_s_at	1.18e-07	2.16e-09	-31.2811	12.4165	-1.46401	HNRNPH2	heterogeneous nuclear ribonucleoprotein H2	0.362484
axo17544-f_at	2.1e-07	5.2e-09	-27.8844	11.4748	-1.46322	MRPL47	mitochondrial ribosomal protein L47 isoform a	0.362684
axo16972-r_at	5.4e-06	5.29e-07	-15.1384	6.40007	-1.46017	PBK	PDZ binding kinase	0.36345
axo14929-r_at	1.55e-06	9.91e-08	-18.9154	8.25367	-1.46003	NCAPH	non-SMC condensin I complex, subunit H	0.363485
axo07858-f_at	2.56e-07	7.16e-09	-26.7396	11.1293	-1.45603	GBP1	guanylate binding protein 1, interferon-inducible, 67kDa	0.364495
axo15787-f_at	1.77e-06	1.18e-07	-18.4801	8.05966	-1.45469	GLTP	glycolipid transfer protein	0.364833
axo21080-f_at	1.55e-06	9.84e-08	-18.9323	8.26108	-1.4505	RRS1	homolog of yeast ribosome biogenesis regulatory protein RRS1	0.365894
axo00317-f_at	4.97e-07	1.99e-08	-23.38	10.0175	-1.44919	DNAJB6	DnaJ (Hsp40) homolog, subfamily B, member 6 isoform a	0.366226
axo19325-f_at	2.34e-06	1.75e-07	-17.5444	7.62675	-1.44859	C6orf27	G7c protein	0.366379
axo02501-f_at	1.63e-07	3.53e-09	-29.3341	11.8911	-1.44793	R3HDML	R3H domain containing-like	0.366546
axo09745-f_at	3.92e-06	3.49e-07	-16.0037	6.86179	-1.44749	PLK3	polo-like kinase 3	0.366658
axo03168-f_at	1.5e-06	9.45e-08	-19.0339	8.30569	-1.44746	PHLDB3	pleckstrin homology-like domain, family B, member 3	0.366666
axo08282-f_at	5.92e-06	5.98e-07	-14.8907	6.26322	-1.44714	NGFR	nerve growth factor receptor precursor	0.366749
axo15888-f_at	7.37e-06	7.88e-07	-14.3495	5.95644	-1.4459	GCNT4	core 2 beta-1,6-N-acetylglucosaminyltransferase 3	0.367063
axo12195-f_at	0.000193	4.57e-05	-8.19947	1.43631	-1.44549	IGF2BP3	insulin-like growth factor 2 mRNA binding protein 3	0.367168
axo01755-r_at	2.14e-06	1.56e-07	-17.8153	7.75439	-1.4442	C1orf83	hypothetical protein LOC127428	0.367496
axo13251-f_at	2.92e-05	4.59e-06	-11.302	3.99492	-1.44356	UCK2	uridine-cytidine kinase 2	0.367659
axo02631-r_at	1.38e-05	1.8e-06	-12.8332	5.03467	-1.44325	FAM101A	hypothetical protein LOC144347	0.367737
axo11332-f_at	1.05e-06	5.66e-08	-20.3703	8.87112	-1.4428	KIF20A	kinesin family member 20A	0.367853
axo08702-f_at	7.07e-06	7.48e-07	-14.45	6.01425	-1.44163	RPA1	replication protein A1, 70kDa	0.368152
axo01847-f_s_at	2.18e-07	5.42e-09	-27.7313	11.4294	-1.44122	SPINT1	serine peptidase inhibitor, Kunitz type 1 isoform 2 precursor	0.368257
axo07497-f_at	9.52e-06	1.11e-06	-13.704	5.57581	-1.44118	ATP2A2	ATPase, Ca++ transporting, slow twitch 2 isoform 2	0.368267
axo17106-r_at	2.21e-07	5.6e-09	-27.6123	11.394	-1.44082	GNMT	glycine N-methyltransferase	0.368357
axo03418-f_at	2.9e-07	8.86e-09	-26.0033	10.8987	-1.44056	ENTPD2	ectonucleoside triphosphate diphosphohydrolase 2 isoform 1	0.368424
axo19711-f_at	1.35e-07	2.65e-09	-30.4504	12.1968	-1.44045	B3GNT5	UDP-GlcNAc:betaGal beta-1,3-N-acetylglucosaminyltransferase 5	0.368453
axo03215-f_at	3.47e-05	5.69e-06	-10.9734	3.75514	-1.4398	ARRB2	arrestin, beta 2 isoform 2	0.368618
axo08724-r_at	9.14e-07	4.64e-08	-20.9128	9.09004	-1.43387	CYP51A1	cytochrome P450, family 51, subfamily A, polypeptide 1 isoform 1	0.370137
axo19766-f_at	2.62e-07	7.56e-09	-26.5471	11.0696	-1.43157	WDR75	WD repeat domain 75	0.370727
axo19683-f_at	8.18e-07	3.98e-08	-21.3374	9.2574	-1.42959	CCNB1	cyclin B1	0.371235
axo13069-f_at	5.62e-07	2.34e-08	-22.8806	9.83818	-1.42783	HYAL4	hyaluronoglucosaminidase 4	0.371691
axo07966-f_at	3.28e-07	1.07e-08	-25.3786	10.6976	-1.42754	ID3	inhibitor of DNA binding 3	0.371764
axo13084-r_at	1.03e-06	5.47e-08	-20.4596	8.90757	-1.42682	CABIN1	calcineurin binding protein 1	0.37195
axo02043-f_at	3.48e-06	2.98e-07	-16.3387	7.03406	-1.42572	NR4A1	nuclear receptor subfamily 4, group A, member 1	0.372233
axo10556-f_at	5.91e-07	2.51e-08	-22.6754	9.76332	-1.42536	ATP6V1G1	vacuolar H+ ATPase G1	0.372327
axo12635-f_at	4.39e-07	1.66e-08	-23.9413	10.2145	-1.42288	UBE2C	ubiquitin-conjugating enzyme E2C isoform 1	0.372967
axo18165-r_at	7.27e-06	7.75e-07	-14.3805	5.97432	-1.42204	MAD1L1	MAD1-like 1 protein	0.373183
axo00787-r_at	3.8e-06	3.34e-07	-16.0938	6.90844	-1.42018	KIF23	kinesin family member 23 isoform 1	0.373667
axo04988-f_at	1.91e-06	1.32e-07	-18.2157	7.93954	-1.41876	RBM47	RNA binding motif protein 47 isoform a	0.374034
axo18297-f_at	7.37e-06	7.89e-07	-14.3477	5.95542	-1.41629	TNN	tenascin N	0.374676
axo08154-f_at	8.86e-06	1.01e-06	-13.877	5.67948	-1.41587	MCM3	minichromosome maintenance complex component 3	0.374784
axo06377-f_at	1.36e-06	8.14e-08	-19.413	8.47007	-1.41382	PRKRA	protein kinase, interferon-inducible double stranded RNA dependent activator isoform 3	0.375316
axo04547-f_at	3.69e-07	1.28e-08	-24.7806	10.5001	-1.41375	SLC39A7	solute carrier family 39, member 7	0.375336
axo06449-f_at	0.00468	0.00192	-4.60968	-2.68777	-1.41313	LUZP1	leucine zipper protein 1	0.375495
axo09359-f_at	2.32e-06	1.72e-07	-17.5828	7.64495	-1.41075	BCAS1	breast carcinoma amplified sequence 1	0.376116
axo11152-f_at	6.39e-07	2.79e-08	-22.3588	9.64644	-1.40889	CALHM1	calcium homeostasis modulator 1	0.376602
axo12092-r_at	2.39e-07	6.44e-09	-27.1154	11.2444	-1.40833	DRAP1	DR1-associated protein 1	0.376747
axo04606-f_at	0.000271	6.82e-05	-7.74034	0.99125	-1.40785	ITGA6	integrin alpha chain, alpha 6 isoform a precursor	0.376874
axo15912-f_at	0.000118	2.55e-05	-8.90953	2.0866	-1.40619	MEX3C	ring finger and KH domain containing 2	0.377307
axo17604-f_at	6.79e-07	3.07e-08	-22.0838	9.54351	-1.40615	PELI1	pellino protein	0.377316
axo13661-f_at	3.78e-06	3.33e-07	-16.1049	6.91418	-1.40534	ORC6L	origin recognition complex subunit 6	0.377529
axo18086-f_at	3.41e-06	2.9e-07	-16.4051	7.06779	-1.40466	OVOL2	zinc finger protein 339	0.377707
axo12380-f_at	2.54e-06	1.94e-07	-17.3086	7.51401	-1.40365	SLC20A2	solute carrier family 20, member 2	0.377971
axo16547-r_at	2.73e-05	4.22e-06	-11.433	4.08875	-1.40302	FAM102B	hypothetical protein LOC284611	0.378136
axo03408-f_at	2.26e-07	5.84e-09	-27.4611	11.3488	-1.40167	RCAN1	calcipressin 1 isoform c	0.37849
axo02611-f_at	8.1e-06	8.94e-07	-14.1081	5.81605	-1.39808	UPP1	uridine phosphorylase 1	0.379433
axo11819-f_at	6.12e-07	2.63e-08	-22.535	9.71171	-1.39734	PCSK5	proprotein convertase subtilisin/kexin type 5 preproprotein	0.379628
axo05889-f_at	1.39e-06	8.46e-08	-19.3166	8.42858	-1.39731	SUPT5H	suppressor of Ty 5 homolog isoform b	0.379635
axo09533-r_at	0.000136	3.02e-05	-8.69876	1.89814	-1.39722	NAPA	N-ethylmaleimide-sensitive factor attachment protein, alpha	0.379659
axo11730-f_at	1.45e-06	8.93e-08	-19.177	8.36812	-1.39644	PRMT5	protein arginine methyltransferase 5 isoform a	0.379865
axo11174-f_at	1.63e-07	3.52e-09	-29.3425	11.8934	-1.39593	NCCRP1	non-specific cytotoxic cell receptor protein 1 homolog	0.38
axo10223-f_at	2.34e-07	6.2e-09	-27.2489	11.2849	-1.39532	PCK2	mitochondrial phosphoenolpyruvate carboxykinase 2 isoform 1 precursor	0.380161
axo09385-r_s_at	7.19e-07	3.32e-08	-21.8512	9.45543	-1.39448	KHSRP	KH-type splicing regulatory protein (FUSE binding protein 2)	0.380382
axo00947-f_at	7e-07	3.19e-08	-21.9709	9.50087	-1.39429	EHD4	EH-domain containing 4	0.380431
axo05456-r_at	1.65e-07	3.62e-09	-29.2412	11.8651	-1.39305	C1orf194	hypothetical protein LOC127003	0.380758
axo16046-r_at	2.48e-07	6.86e-09	-26.8915	11.176	-1.39305	PARP14	poly (ADP-ribose) polymerase family, member 14	0.380759
axo15063-f_at	7.46e-07	3.53e-08	-21.679	9.38957	-1.39277	FAM98A	hypothetical protein LOC25940	0.380833
axo04409-f_at	1.83e-07	4.26e-09	-28.6258	11.6905	-1.39185	SMAP1	stromal membrane-associated GTPase-activating protein 1 isoform A	0.381077
axo00433-f_at	1.53e-05	2.05e-06	-12.6136	4.89281	-1.39161	SPSB4	splA/ryanodine receptor domain and SOCS box containing 4	0.381139
axo20926-f_s_at	1.98e-07	4.77e-09	-28.2033	11.5683	-1.39153	IFITM3	interferon-induced transmembrane protein 3 (1-8U)	0.381162
axo00417-f_s_at	1.5e-07	3.1e-09	-29.8401	12.0312	-1.39144	SRrp35	serine-arginine repressor protein	0.381183
axo05870-f_at	2.06e-06	1.48e-07	-17.9395	7.81224	-1.38856	PPP3CA	protein phosphatase 3, catalytic subunit, alpha isoform isoform 2	0.381947
axo07023-f_at	2.61e-07	7.43e-09	-26.6072	11.0883	-1.38841	CASP6	caspase 6 isoform alpha preproprotein	0.381987
axo20151-f_at	1.56e-05	2.1e-06	-12.5689	4.86365	-1.38777	TMEM209	transmembrane protein 209	0.382156
axo16329-f_at	4.73e-06	4.44e-07	-15.4967	6.59425	-1.38634	PARP16	poly (ADP-ribose) polymerase family, member 16	0.382533
axo03274-f_at	1.54e-06	9.74e-08	-18.9599	8.27324	-1.38151	TPD52L2	tumor protein D52-like 2 isoform c	0.383817
axo05298-f_at	7.73e-05	1.53e-05	-9.57231	2.65581	-1.37658	FLNA	filamin A, alpha isoform 2	0.385131
axo05472-r_at	1.81e-05	2.54e-06	-12.2514	4.65373	-1.37576	AP1B1	adaptor-related protein complex 1 beta 1 subunit isoform a	0.385349
axo07145-f_at	7.57e-07	3.6e-08	-21.6271	9.36961	-1.37481	DHX15	DEAH (Asp-Glu-Ala-His) box polypeptide 15	0.385604
axo12861-r_at	2.34e-07	6.16e-09	-27.2685	11.2908	-1.3738	STAT1	signal transducer and activator of transcription 1 isoform alpha	0.385873
axo01235-r_s_at	3.17e-07	1.02e-08	-25.5413	10.7504	-1.37344	TRIM11	tripartite motif-containing 11	0.385969
axo19070-f_at	1.42e-05	1.86e-06	-12.7761	4.99805	-1.3721		transmembrane channel-like 7	0.386328
axo13023-r_at	7.82e-07	3.77e-08	-21.4899	9.31665	-1.37144	HNRNPH3	heterogeneous nuclear ribonucleoprotein H3 isoform a	0.386506
axo16229-f_at	7.56e-07	3.58e-08	-21.6374	9.37359	-1.37139	NSUN2	NOL1/NOP2/Sun domain family, member 2	0.386517
axo00161-f_at	4.86e-07	1.92e-08	-23.4825	10.0539	-1.37104	MAL2	MAL2 proteolipid protein	0.386612
axo20454-f_at	2.75e-07	8.24e-09	-26.2491	10.9764	-1.37082	RPL31	ribosomal protein L31 isoform 3	0.386673
axo00349-f_at	1.84e-07	4.31e-09	-28.5801	11.6774	-1.36881	SDCBP2	syndecan binding protein 2 isoform a	0.387211
axo14269-f_at	6.36e-05	1.2e-05	-9.90203	2.92658	-1.36774	ENPP4	ectonucleotide pyrophosphatase/phosphodiesterase 4 (putative function)	0.387498
axo00975-f_at	4.69e-07	1.84e-08	-23.6295	10.1057	-1.36729	CASC5	cancer susceptibility candidate 5 isoform 2	0.387619
axo14386-f_at	7.8e-07	3.75e-08	-21.5047	9.32238	-1.36568	RPS6KA1	ribosomal protein S6 kinase, 90kDa, polypeptide 1 isoform b	0.388052
axo19597-f_at	2.12e-06	1.53e-07	-17.8563	7.77352	-1.36056	FAM107B	hypothetical protein LOC83641	0.389432
axo19806-f_at	2.89e-06	2.31e-07	-16.9026	7.3164	-1.35958	ZCCHC7	zinc finger, CCHC domain containing 7	0.389695
axo02845-f_at	3.29e-07	1.09e-08	-25.3101	10.6752	-1.35927	RAB27A	Ras-related protein Rab-27A	0.38978
axo11751-f_at	4.69e-05	8.25e-06	-10.4263	3.34143	-1.35904	DYNC1LI2	dynein, cytoplasmic, light intermediate polypeptide 2	0.389841
axo11153-f_at	3.69e-07	1.29e-08	-24.7575	10.4924	-1.35855	HES1	hairy and enhancer of split 1	0.389975
axo15783-r_at	8.57e-06	9.65e-07	-13.963	5.73056	-1.35789		G-2 and S-phase expressed 1	0.390152
axo11278-f_at	1.27e-06	7.42e-08	-19.6545	8.57309	-1.35713	PSCA	prostate stem cell antigen preproprotein	0.390359
axo02431-f_at	1.55e-06	9.92e-08	-18.9122	8.25226	-1.35711	CDH26	cadherin-like 26 isoform a	0.390364
axo16609-f_at	1.23e-06	7.1e-08	-19.7675	8.62086	-1.3556	CENPQ	centromere protein Q	0.390771
axo11240-f_at	1.68e-06	1.11e-07	-18.639	8.131	-1.35531	SFRS4	splicing factor, arginine/serine-rich 4	0.39085
axo19969-f_at	0.000665	0.000198	-6.61677	-0.18997	-1.35514	PHF6	PHD finger protein 6 isoform 1	0.390896
axo03840-f_at	0.00194	0.000692	-5.45307	-1.57188	-1.35487		PREDICTED: similar to zinc finger protein 316	0.39097
axo00192-r_at	4.57e-07	1.76e-08	-23.7507	10.1481	-1.35394	TMEM123	transmembrane protein 123 precursor	0.391221
axo16188-f_at	0.000378	0.000102	-7.29955	0.54417	-1.35364	MFSD6	major facilitator superfamily domain containing 6	0.391303
axo00518-f_at	3.18e-07	1.02e-08	-25.5183	10.743	-1.35339	DEDD2	death effector domain-containing DNA binding protein 2	0.391372
axo06339-f_at	1.23e-05	1.55e-06	-13.0999	5.20401	-1.35337	ALOX12B	arachidonate 12-lipoxygenase, 12R type	0.391376
axo20953-f_s_at	4.14e-07	1.52e-08	-24.2179	10.3098	-1.35262		EBNA1 binding protein 2	0.39158
axo19523-f_at	1.47e-06	9.07e-08	-19.1397	8.35191	-1.35228	RBCK1	RanBP-type and C3HC4-type zinc finger containing 1 isoform 2	0.391674
axo04535-f_at	1.09e-06	6.02e-08	-20.2064	8.80382	-1.34959	BCLAF1	BCL2-associated transcription factor 1 isoform 2	0.392404
axo14953-f_at	2.77e-05	4.3e-06	-11.4027	4.06713	-1.34947	SKIV2L2	superkiller viralicidic activity 2-like 2	0.392437
axo12581-f_at	4.31e-07	1.62e-08	-24.0221	10.2424	-1.34822	UPK3A	uroplakin 3A precursor	0.392775
axo07745-f_at	4.73e-06	4.44e-07	-15.4975	6.59469	-1.34802	E2F3	E2F transcription factor 3	0.392832
axo11338-r_at	3.15e-07	1e-08	-25.5756	10.7616	-1.34719	HDGF2	hepatoma-derived growth factor-related protein 2 isoform 1	0.393058
axo20163-f_at	6.48e-07	2.86e-08	-22.2903	9.62092	-1.34662	HSH2D	hematopoietic SH2 domain containing	0.393213
axo12558-f_at	3.72e-07	1.31e-08	-24.7067	10.4754	-1.34639	SFRS5	splicing factor, arginine/serine-rich 5	0.393276
axo19228-r_at	5.39e-06	5.27e-07	-15.146	6.40423	-1.34417	MUS81	MUS81 endonuclease homolog	0.39388
axo21521-f_at	9.72e-07	5.08e-08	-20.6628	8.98987	-1.34378	GNPNAT1	glucosamine-phosphate N-acetyltransferase 1	0.393986
axo03429-f_at	4.36e-07	1.65e-08	-23.9634	10.2221	-1.34326	KEAP1	kelch-like ECH-associated protein 1	0.39413
axo14726-r_at	5.19e-05	9.32e-06	-10.2516	3.20526	-1.34318	DNAJC9	DnaJ homolog, subfamily C, member 9	0.394152
axo15550-f_at	2.26e-06	1.67e-07	-17.6527	7.67801	-1.33869	RAB10	ras-related GTP-binding protein RAB10	0.395378
axo02131-f_at	3.72e-07	1.31e-08	-24.6924	10.4706	-1.33794	MYCL1	l-myc-1 proto-oncogene isoform 1	0.395585
axo12780-f_at	1.54e-05	2.06e-06	-12.6011	4.88468	-1.3357	DUSP10	dual specificity phosphatase 10 isoform a	0.3962
axo15321-f_at	4.27e-07	1.59e-08	-24.0814	10.2629	-1.33529	UMOD	uromodulin precursor	0.396313
axo17960-f_at	2.21e-07	5.64e-09	-27.587	11.3864	-1.33452	UBC	ubiquitin C	0.396523
axo15289-r_x_at	3.16e-07	1.01e-08	-25.5644	10.7579	-1.33373	KRT76	keratin 76	0.396741
axo17123-f_at	9.18e-07	4.67e-08	-20.8914	9.0815	-1.3329	DNAJC10	DnaJ (Hsp40) homolog, subfamily C, member 10	0.396968
axo21114-f_s_at	1.75e-07	4.02e-09	-28.8407	11.7519	-1.3328	TRIM4	tripartite motif protein TRIM4 isoform alpha	0.396997
axo15693-f_at	8.86e-07	4.45e-08	-21.0249	9.13455	-1.33146	GPN3	GPN-loop GTPase 3	0.397366
axo04974-f_at	2.56e-07	7.23e-09	-26.7056	11.1188	-1.33144	TMBIM6	testis enhanced gene transcript (BAX inhibitor 1) isoform 2	0.397371
axo12174-f_at	5.65e-06	5.63e-07	-15.0123	6.33068	-1.33099	TFPI2	tissue factor pathway inhibitor 2	0.397494
axo15086-r_at	1.07e-06	5.86e-08	-20.2774	8.83305	-1.33092	TIPARP	TCDD-inducible poly(ADP-ribose) polymerase	0.397513
axo19556-f_at	1.28e-06	7.55e-08	-19.6097	8.55406	-1.33066	EPPK1	epiplakin 1	0.397585
axo04593-f_at	7.01e-06	7.37e-07	-14.4774	6.02996	-1.32861	ETV4	ets variant gene 4 (E1A enhancer binding protein, E1AF)	0.398152
axo18315-f_at	1.74e-06	1.16e-07	-18.5207	8.07792	-1.32622	CARS	cysteinyl-tRNA synthetase isoform c	0.398811
axo08895-f_at	4.85e-07	1.91e-08	-23.4986	10.0596	-1.32505	RPS6KB1	ribosomal protein S6 kinase, 70kDa, polypeptide 1	0.399135
axo10330-f_at	6.18e-06	6.29e-07	-14.7893	6.20657	-1.32422	CLIC3	chloride intracellular channel 3	0.399365
axo11767-r_at	8.49e-07	4.17e-08	-21.2048	9.20547	-1.32417	C14orf37	hypothetical protein LOC145407	0.399378
axo08123-f_at	2.74e-07	8.09e-09	-26.3154	10.9973	-1.32386	EPCAM	epithelial cell adhesion molecule precursor	0.399464
axo06445-f_at	3.15e-06	2.6e-07	-16.64	7.18606	-1.32335	FBXO5	F-box only protein 5 isoform b	0.399607
axo08594-f_at	1.02e-06	5.41e-08	-20.4938	8.92145	-1.32245	PTPRZ1	protein tyrosine phosphatase, receptor-type, zeta1 precursor	0.399855
axo16404-f_at	2.99e-06	2.43e-07	-16.7926	7.26205	-1.32045	PRPF39	PRP39 pre-mRNA processing factor 39 homolog	0.40041
axo07360-f_s_at	4.35e-07	1.64e-08	-23.9847	10.2295	-1.31856	HNRNPL	heterogeneous nuclear ribonucleoprotein L isoform a	0.400935
axo06518-r_at	2.76e-07	8.26e-09	-26.2402	10.9736	-1.31849	COL17A1	alpha 1 type XVII collagen	0.400953
axo12615-r_at	5.94e-07	2.53e-08	-22.657	9.75656	-1.31794	UPK1A	uroplakin 1A	0.401108
axo07978-r_at	4.22e-07	1.56e-08	-24.135	10.2813	-1.31787	IRF1	interferon regulatory factor 1	0.401126
axo18087-r_at	2.62e-06	2.03e-07	-17.2044	7.46373	-1.31754	MYL7	myosin light chain 2a	0.40122
axo01880-r_at	2.03e-05	2.94e-06	-12.0122	4.49225	-1.31696	C9orf21	hypothetical protein LOC195827	0.401379
axo10406-f_at	8.86e-06	1.01e-06	-13.8794	5.68089	-1.31597	MTA2	metastasis-associated protein 2	0.401656
axo10352-f_at	1.25e-06	7.22e-08	-19.724	8.60249	-1.31483	SLC16A6	solute carrier family 16, member 6	0.401972
axo05380-f_at	6.88e-07	3.12e-08	-22.0353	9.5252	-1.31463	TTC22	tetratricopeptide repeat domain 22 isoform 1	0.402029
axo00457-r_at	7.56e-07	3.59e-08	-21.6324	9.37166	-1.3125	MXI1	MAX interactor 1 isoform b	0.402623
axo13133-f_at	5.96e-07	2.54e-08	-22.6378	9.74954	-1.31198	MMD	monocyte to macrophage differentiation-associated precursor	0.402767
axo12605-f_at	3.51e-05	5.76e-06	-10.9554	3.74186	-1.31151	ADAMTS1	ADAM metallopeptidase with thrombospondin type 1 motif, 1 preproprotein	0.402898
axo12023-f_at	1.35e-06	8.13e-08	-19.4181	8.47222	-1.31086	CIB1	calcium and integrin binding 1	0.403082
axo08863-f_at	5.72e-07	2.39e-08	-22.8225	9.81706	-1.31006	SQLE	squalene epoxidase	0.403304
axo10890-f_at	2.98e-05	4.71e-06	-11.2628	3.96661	-1.30968	DLX6	distal-less homeobox 6	0.40341
axo12119-r_at	1.03e-05	1.23e-06	-13.5081	5.45696	-1.30912	POLR3C	polymerase (RNA) III (DNA directed) polypeptide C (62kD)	0.403567
axo10749-f_at	9.74e-07	5.12e-08	-20.6416	8.98132	-1.30675	PLA2G7	phospholipase A2, group VII	0.404232
axo21563-f_at	4.17e-05	7.16e-06	-10.6327	3.49969	-1.30554	MPEG1	macrophage expressed gene 1	0.404568
axo09136-r_at	0.000107	2.26e-05	-9.06195	2.22058	-1.30534	ZIC1	zinc finger protein of the cerebellum 1	0.404626
axo08845-f_at	4.67e-07	1.81e-08	-23.6753	10.1218	-1.30495	UAP1	UDP-N-acteylglucosamine pyrophosphorylase 1	0.404735
axo08505-f_at	5.57e-07	2.31e-08	-22.9201	9.85255	-1.30408	PRTN3	proteinase 3 (serine proteinase, neutrophil, Wegener granulomatosis autoantigen)	0.404979
axo02994-f_at	2.18e-07	5.45e-09	-27.7148	11.4245	-1.29958		leader-binding protein 32 isoform 2	0.406245
axo12960-f_at	6.14e-07	2.64e-08	-22.5195	9.70598	-1.29919	TPX2	TPX2, microtubule-associated protein homolog	0.406356
axo04143-r_at	3.46e-06	2.96e-07	-16.354	7.04185	-1.29907		PREDICTED: similar to hCG1811042	0.406387
axo20304-r_at	2.08e-05	3.03e-06	-11.9624	4.45829	-1.2976	CNP	2',3'-cyclic nucleotide 3' phosphodiesterase	0.406801
axo12863-f_at	5.37e-05	9.75e-06	-10.1882	3.15531	-1.29541	KIF22	kinesin family member 22	0.407419
axo04303-f_at	4.27e-07	1.6e-08	-24.0631	10.2566	-1.29305	TFAP2A	transcription factor AP-2 alpha isoform c	0.408088
axo05820-f_at	8.12e-06	8.99e-07	-14.0982	5.81022	-1.292	FAM108A1	hypothetical protein LOC81926 isoform 2	0.408384
axo04266-f_at	1.22e-06	7.02e-08	-19.7977	8.63356	-1.29198	INCENP	inner centromere protein antigens 135/155kDa isoform 1	0.408391
axo02977-f_at	2.56e-07	7.15e-09	-26.7417	11.1299	-1.29198	AQP1	aquaporin 1	0.408391
axo02404-r_at	2.68e-05	4.14e-06	-11.4635	4.11045	-1.29128	PPARD	peroxisome proliferative activated receptor, delta isoform 2	0.408589
axo07791-f_at	3.73e-07	1.32e-08	-24.6701	10.4631	-1.29029	F13B	coagulation factor XIII B subunit precursor	0.40887
axo10716-r_at	3.82e-07	1.37e-08	-24.557	10.425	-1.28922	PSMD5	proteasome 26S non-ATPase subunit 5	0.409173
axo11511-r_s_at	1.87e-06	1.28e-07	-18.283	7.97029	-1.28895	MCM4	minichromosome maintenance complex component 4	0.409248
axo10693-r_at	4.27e-06	3.9e-07	-15.7684	6.73867	-1.28777	PGGT1B	protein geranylgeranyltransferase type I, beta subunit	0.409584
axo08535-r_at	1.56e-06	1e-07	-18.8865	8.24093	-1.28732	PSMD1	proteasome 26S non-ATPase subunit 1	0.40971
axo10171-f_at	8.94e-06	1.02e-06	-13.8552	5.6665	-1.28599	MCM2	minichromosome maintenance complex component 2	0.41009
axo03693-r_at	1.72e-05	2.39e-06	-12.3507	4.71992	-1.28597		PREDICTED: hypothetical protein	0.410094
axo10880-r_at	2.19e-06	1.61e-07	-17.7367	7.71755	-1.28529	CRKL	v-crk sarcoma virus CT10 oncogene homolog (avian)-like	0.410288
axo15211-r_at	5.1e-06	4.87e-07	-15.3046	6.49068	-1.28208	AAAS	achalasia, adrenocortical insufficiency, alacrimia (Allgrove, triple-A)	0.411201
axo15175-f_at	2.64e-06	2.04e-07	-17.1878	7.45571	-1.2802	PRPF31	pre-mRNA processing factor 31 homolog	0.411739
axo18002-f_at	2.92e-07	9.05e-09	-25.9279	10.8747	-1.27993	XK	membrane transport protein XK	0.411815
axo07638-f_at	5.88e-07	2.49e-08	-22.6954	9.77064	-1.27923	COL2A1	collagen, type II, alpha 1 isoform 1 precursor	0.412015
axo20613-f_at	6.33e-07	2.76e-08	-22.3941	9.65953	-1.27881	ID2	inhibitor of DNA binding 2	0.412134
axo11566-f_at	0.000737	0.000223	-6.4976	-0.32363	-1.27816	MYH10	myosin, heavy polypeptide 10, non-muscle	0.41232
axo11385-f_at	2.63e-06	2.03e-07	-17.1982	7.46073	-1.2777	RBM6	RNA binding motif protein 6	0.412453
axo18710-r_at	2.34e-07	6.19e-09	-27.2546	11.2866	-1.27631	DSCC1	defective in sister chromatid cohesion 1	0.41285
axo01386-f_at	2.55e-06	1.95e-07	-17.2892	7.50471	-1.27482	GPRC6A	G protein-coupled receptor, family C, group 6, member A	0.413276
axo05194-r_at	2.74e-07	8.17e-09	-26.2806	10.9863	-1.27347	SNX18	sorting nexin 18 isoform a	0.413664
axo10620-f_at	3.29e-07	1.09e-08	-25.3113	10.6756	-1.27125	FUS	fusion (involved in t(12;16) in malignant liposarcoma)	0.414299
axo10320-f_at	6.33e-07	2.76e-08	-22.3962	9.66032	-1.27099	RAB11A	Ras-related protein Rab-11A	0.414374
axo09966-f_at	1.55e-06	9.83e-08	-18.9354	8.26248	-1.26984	BUB1	budding uninhibited by benzimidazoles 1	0.414706
axo06433-f_at	2.8e-06	2.2e-07	-17.0133	7.37073	-1.26984	GPT2	glutamic pyruvate transaminase 2 isoform 2	0.414706
axo00774-f_at	5.58e-07	2.32e-08	-22.9082	9.8482	-1.2696	TLCD1	TLC domain containing 1	0.414774
axo16875-r_at	3.18e-07	1.02e-08	-25.5283	10.7462	-1.26938	STRBP	spermatid perinuclear RNA binding protein	0.414839
axo17053-f_at	2.6e-07	7.41e-09	-26.6193	11.0921	-1.2685	LECT1	leukocyte cell derived chemotaxin 1 isoform 2 precursor	0.415092
axo07046-r_at	3.8e-05	6.39e-06	-10.8003	3.62624	-1.26766	CDC5L	CDC5-like	0.415333
axo21334-f_at	1.32e-06	7.88e-08	-19.4972	8.5061	-1.26581	HIATL1	hippocampus abundant transcript-like 1	0.415867
axo08427-r_at	7.96e-05	1.58e-05	-9.52776	2.61861	-1.26512	PNN	pinin, desmosome associated protein	0.416066
axo18530-f_at	1.61e-06	1.04e-07	-18.7969	8.20131	-1.26456	IPPK	inositol 1,3,4,5,6-pentakisphosphate 2-kinase	0.416226
axo03365-f_at	1.75e-05	2.43e-06	-12.3248	4.70269	-1.26427	SF1	splicing factor 1 isoform 3	0.416311
axo15443-r_at	2.74e-07	8.16e-09	-26.2832	10.9871	-1.26385	UBE2J1	ubiquitin-conjugating enzyme E2, J1	0.416431
axo10643-f_at	4.95e-05	8.78e-06	-10.3378	3.27265	-1.26291	LIMS1	LIM and senescent cell antigen-like domains 1	0.416703
axo18518-f_at	5.91e-05	1.09e-05	-10.0291	3.02886	-1.26169	PARP12	zinc finger CCCH-type domain containing 1	0.417056
axo11192-r_at	7.11e-07	3.27e-08	-21.8997	9.47385	-1.26135	LGALS3BP	galectin 3 binding protein	0.417153
axo01201-f_at	8.54e-07	4.22e-08	-21.1731	9.19304	-1.25942	MAP2K3	mitogen-activated protein kinase kinase 3 isoform B	0.417712
axo08894-f_at	1.57e-05	2.13e-06	-12.5454	4.84826	-1.25918	RPS6KB1	ribosomal protein S6 kinase, 70kDa, polypeptide 1	0.417781
axo19493-f_at	1.03e-05	1.23e-06	-13.5191	5.46367	-1.25878		ring finger protein 170	0.417896
axo03207-f_at	4.36e-06	3.99e-07	-15.7191	6.71264	-1.25748	TGM6	transglutaminase 6	0.418273
axo04878-f_at	4.43e-07	1.69e-08	-23.8915	10.1972	-1.25585	C17orf67	hypothetical protein LOC339210	0.418748
axo04294-f_at	2.58e-06	1.99e-07	-17.2499	7.48576	-1.2545	MSH2	mutS homolog 2	0.419139
axo04221-f_at	5.33e-06	5.18e-07	-15.1776	6.42154	-1.25417	LFNG	lunatic fringe isoform b	0.419235
axo06899-f_at	1.46e-05	1.93e-06	-12.7138	4.95784	-1.25299	PIP4K2C	phosphatidylinositol-5-phosphate 4-kinase, type II, gamma isoform a	0.419578
axo16459-f_at	1.51e-06	9.52e-08	-19.0165	8.29806	-1.2502	FAM83B	hypothetical protein LOC222584	0.42039
axo12770-f_at	2.79e-06	2.18e-07	-17.0318	7.37982	-1.24842	WIF1	WNT inhibitory factor 1 precursor	0.420908
axo12862-f_at	1.18e-06	6.7e-08	-19.921	8.68531	-1.24667	KIF22	kinesin family member 22	0.421419
axo19445-r_at	4.44e-07	1.7e-08	-23.8722	10.1905	-1.2464	TPM1	tropomyosin 1 alpha chain isoform 6	0.421499
axo20072-r_at	1.79e-05	2.51e-06	-12.2723	4.66774	-1.24581	MPV17L2	MPV17 mitochondrial membrane protein-like 2	0.42167
axo07941-r_at	2.51e-05	3.81e-06	-11.5926	4.20177	-1.24516	HPD	4-hydroxyphenylpyruvate dioxygenase	0.42186
axo13165-r_at	2.61e-07	7.49e-09	-26.5824	11.0806	-1.24484	NUPR1	p8 protein isoform b	0.421954
axo01943-r_at	3.46e-06	2.96e-07	-16.3554	7.04255	-1.24407	RASSF1	Ras association domain family 1 isoform D	0.422179
axo11232-f_at	4.31e-05	7.45e-06	-10.5743	3.45517	-1.24215	RHEB	Ras homolog enriched in brain	0.422743
axo15661-f_at	0.000249	6.16e-05	-7.85455	1.10386	-1.24167	LEF1	lymphoid enhancer-binding factor 1 isoform 1	0.422882
axo06635-f_at	0.000243	5.99e-05	-7.88607	1.13472	-1.24152	DST	dystonin isoform 4	0.422926
axo06393-f_at	4.49e-07	1.72e-08	-23.8275	10.1749	-1.24073	SMC6	SMC6 protein	0.423159
axo21307-f_s_at	5.49e-07	2.27e-08	-22.9784	9.87363	-1.23914	HNRNPD	heterogeneous nuclear ribonucleoprotein D isoform a	0.423624
axo14441-f_at	2.61e-05	3.99e-06	-11.5218	4.15178	-1.2391	WAPAL	wings apart-like homolog	0.423636
axo00699-r_at	2.74e-07	8.12e-09	-26.2998	10.9924	-1.23899	RRM2	ribonucleotide reductase M2 polypeptide	0.42367
axo12733-f_at	4.69e-06	4.39e-07	-15.5178	6.60556	-1.23898	ZNF185	zinc finger protein 185	0.423672
axo04592-f_at	2.35e-06	1.76e-07	-17.5284	7.61914	-1.23746	ETV4	ets variant gene 4 (E1A enhancer binding protein, E1AF)	0.42412
axo07244-r_s_at	2.07e-05	3e-06	-11.9767	4.46805	-1.23528	ELAVL1	ELAV-like 1	0.424761
axo11205-f_at	2.16e-06	1.58e-07	-17.7795	7.73761	-1.23441	LMNB1	lamin B1	0.425016
axo02523-f_at	3.44e-06	2.93e-07	-16.3797	7.05489	-1.23386	PSMF1	proteasome inhibitor subunit 1	0.425177
axo21092-f_at	1.16e-06	6.57e-08	-19.9713	8.70633	-1.23334	GADD45B	growth arrest and DNA-damage-inducible, beta	0.42533
axo20238-f_at	3.46e-06	2.96e-07	-16.3542	7.04193	-1.23295	CASP10	caspase 10 isoform d preproprotein	0.425446
axo11404-r_at	1.48e-05	1.97e-06	-12.681	4.93657	-1.23171	NME6	nucleoside diphosphate kinase type 6	0.425813
axo07928-f_at	1.45e-06	8.89e-08	-19.1886	8.37316	-1.23127	HMGCS1	hydroxymethylglutaryl-CoA synthase 1	0.425942
axo07650-f_at	1.23e-06	7.05e-08	-19.7856	8.62846	-1.23108	COL9A1	alpha 1 type IX collagen isoform 1 precursor	0.425999
axo09812-f_at	6.33e-05	1.19e-05	-9.91123	2.93402	-1.23031	RAB1A	RAB1A, member RAS oncogene family isoform 1	0.426227
axo10651-r_at	9.94e-06	1.17e-06	-13.5991	5.51239	-1.23023	ATXN3	ataxin 3 isoform 1	0.42625
axo08371-f_at	0.00016	3.66e-05	-8.46395	1.68371	-1.22985	CFP	complement factor properdin precursor	0.426363
axo16681-r_at	6.82e-06	7.11e-07	-14.5477	6.07006	-1.22966	TIAM2	T-cell lymphoma invasion and metastasis 2 isoform b	0.426418
axo19878-f_at	1.26e-06	7.34e-08	-19.6828	8.58507	-1.22958	C10orf58	hypothetical protein LOC84293	0.426441
axo16696-f_at	1.43e-05	1.87e-06	-12.7669	4.99211	-1.22938	VPS35	vacuolar protein sorting 35	0.426499
axo08170-f_at	0.000253	6.25e-05	-7.83709	1.08673	-1.22921	MGAT5	N-acetylglucosaminyltransferase V	0.42655
axo20132-r_s_at	1.13e-06	6.34e-08	-20.068	8.74655	-1.22875	C9orf3	aminopeptidase O	0.426687
axo01351-f_at	9.45e-07	4.88e-08	-20.7702	9.03304	-1.22832	FAM110B	hypothetical protein LOC90362	0.426815
axo02130-f_at	2.51e-05	3.8e-06	-11.597	4.20488	-1.22742	MYCL1	l-myc-1 proto-oncogene isoform 1	0.427081
axo01051-f_at	1.43e-05	1.88e-06	-12.7626	4.98933	-1.22639	FAM76B	hypothetical protein LOC143684	0.427387
axo09634-f_at	4.33e-07	1.63e-08	-24.0002	10.2348	-1.22484	BCL10	B-cell CLL/lymphoma 10	0.427845
axo10906-f_at	2.66e-06	2.07e-07	-17.1567	7.44063	-1.2226	ETS1	v-ets erythroblastosis virus E26 oncogene homolog 1 isoform 2	0.428511
axo02765-f_at	5.28e-05	9.53e-06	-10.2212	3.18133	-1.22187	UPK3B	uroplakin 3B isoform b	0.428728
axo02152-f_at	2.19e-05	3.23e-06	-11.8586	4.387	-1.22027	NOMO2	nodal modulator 2 isoform 2	0.429203
axo05478-f_at	0.000443	0.000122	-7.10569	0.34105	-1.21943	RACGAP1	Rac GTPase activating protein 1	0.429452
axo16031-r_at	8.76e-07	4.38e-08	-21.0725	9.15336	-1.21902	CDV3	carnitine deficiency-associated gene expressed in ventricle 3 isoform b	0.429576
axo00065-r_x_at	4.12e-07	1.51e-08	-24.241	10.3177	-1.21864	KRT71	keratin 71	0.429686
axo06293-r_at	1.13e-05	1.39e-06	-13.2888	5.32196	-1.21715	CASP5	caspase 5 isoform f precursor	0.430131
axo10741-f_at	5.33e-07	2.18e-08	-23.0965	9.91624	-1.21713	TPD52	tumor protein D52 isoform 3	0.430138
axo00057-f_at	3.84e-06	3.39e-07	-16.0612	6.89158	-1.21692	CUGBP2	CUG triplet repeat, RNA binding protein 2 isoform 3	0.4302
axo10319-f_at	4.94e-07	1.97e-08	-23.4103	10.0283	-1.21514	RAB11A	Ras-related protein Rab-11A	0.430731
axo10712-f_at	3.78e-06	3.33e-07	-16.1052	6.91433	-1.21402	PRKX	protein kinase, X-linked	0.431065
axo20102-f_at	3.89e-06	3.45e-07	-16.0284	6.87459	-1.21392	ZC3H10	zinc finger CCCH-type containing 10	0.431094
axo04238-f_at	2.62e-06	2.02e-07	-17.2075	7.46523	-1.21305	CCDC112	coiled-coil domain containing 112 isoform 1	0.431357
axo11526-r_at	8.18e-06	9.06e-07	-14.0827	5.80116	-1.21282	MAP3K5	mitogen-activated protein kinase kinase kinase 5	0.431425
axo04836-f_at	5.42e-06	5.31e-07	-15.1294	6.39513	-1.21197	MYO3B	myosin IIIB isoform 1	0.43168
axo16708-f_at	1.37e-05	1.78e-06	-12.8583	5.05076	-1.21093	EDEM2	ER degradation enhancer, mannosidase alpha-like 2 isoform 1	0.431989
axo09611-r_at	2.16e-06	1.57e-07	-17.7947	7.74473	-1.2106	ZNF259	zinc finger protein 259	0.432089
axo07013-r_at	2.23e-06	1.64e-07	-17.6916	7.69631	-1.20975	BUB1B	budding uninhibited by benzimidazoles 1 beta	0.432343
axo09440-f_at	4.07e-07	1.48e-08	-24.2973	10.3369	-1.20947	SOCS1	suppressor of cytokine signaling 1	0.432426
axo00369-f_at	1.05e-05	1.26e-06	-13.4696	5.43343	-1.20919	WFDC3	WAP four-disulfide core domain 3 precursor	0.432513
axo00973-f_at	3.03e-06	2.47e-07	-16.7554	7.24357	-1.20905	OSBPL2	oxysterol-binding protein-like protein 2 isoform 2	0.432553
axo18936-f_at	1.44e-05	1.91e-06	-12.7381	4.97352	-1.20866	NAT10	N-acetyltransferase 10 isoform a	0.432669
axo19229-f_at	0.000161	3.69e-05	-8.45307	1.67366	-1.20743	MUS81	MUS81 endonuclease homolog	0.433041
axo12200-f_at	4.95e-07	1.97e-08	-23.4034	10.0259	-1.20603	KHDRBS1	KH domain containing, RNA binding, signal transduction associated 1	0.43346
axo12965-f_at	3.47e-06	2.97e-07	-16.3475	7.03851	-1.20484	CD2AP	CD2-associated protein	0.433817
axo11380-f_at	0.000125	2.73e-05	-8.82066	2.00759	-1.20471	SORBS3	sorbin and SH3 domain containing 3 isoform 1	0.433857
axo10242-f_at	5.45e-07	2.25e-08	-23.0058	9.88353	-1.20424	PTGS1	prostaglandin-endoperoxide synthase 1 isoform 1 precursor	0.433999
axo20673-f_at	7.08e-07	3.25e-08	-21.9193	9.48129	-1.20336	SFRS3	splicing factor, arginine/serine-rich 3	0.434262
axo12925-f_at	0.00469	0.00192	-4.60737	-2.69097	-1.20299	ELL2	elongation factor, RNA polymerase II, 2	0.434373
axo09660-f_at	7.57e-06	8.19e-07	-14.2761	5.91402	-1.20244	WASL	Wiskott-Aldrich syndrome gene-like protein	0.434538
axo06423-f_at	8.08e-05	1.61e-05	-9.50155	2.59666	-1.20157	NEDD9	neural precursor cell expressed, developmentally down-regulated 9 isoform 3	0.434801
axo08776-f_at	1.98e-06	1.39e-07	-18.0802	7.87734	-1.20141	ST8SIA1	alpha-2,8-sialyltransferase 1	0.43485
axo10697-f_at	0.000381	0.000103	-7.28805	0.53224	-1.20054	SERPINB10	serine (or cysteine) proteinase inhibitor, clade B (ovalbumin), member 10	0.435113
axo10934-f_at	0.000193	4.56e-05	-8.20105	1.4378	-1.20054	GAK	cyclin G associated kinase	0.435114
axo07495-f_at	3.43e-07	1.16e-08	-25.11	10.6095	-1.19943	ATP1B2	Na+/K+ -ATPase beta 2 subunit	0.435447
axo18031-f_at	2.45e-06	1.85e-07	-17.4083	7.56185	-1.19778	TNFAIP1	tumor necrosis factor, alpha-induced protein 1	0.435947
axo00914-f_at	6.69e-05	1.28e-05	-9.81545	2.85624	-1.19701	TPCN2	two pore segment channel 2	0.436179
axo02494-r_at	5.8e-06	5.81e-07	-14.9467	6.29433	-1.19602	2018-03-03	membrane-associated ring finger (C3HC4) 3	0.436478
axo14930-f_at	3.54e-06	3.05e-07	-16.2896	7.00901	-1.19574	NCAPH	non-SMC condensin I complex, subunit H	0.436561
axo09197-r_at	5.87e-07	2.49e-08	-22.7049	9.77412	-1.19276	TAF15	TBP-associated factor 15 isoform 2	0.437466
axo02052-f_at	3.63e-05	6.01e-06	-10.8909	3.69395	-1.19259	TGIF1	TG-interacting factor isoform b	0.437516
axo14470-r_at	6.57e-05	1.25e-05	-9.84753	2.88237	-1.19218	RRP1B	ribosomal RNA processing 1 homolog B	0.43764
axo06489-r_at	3e-07	9.45e-09	-25.7821	10.828	-1.19111	HNRPLL	heterogeneous nuclear ribonucleoprotein L-like isoform 2	0.437966
axo16618-f_at	7.83e-07	3.79e-08	-21.4782	9.31215	-1.19037	PTPLAD2	protein tyrosine phosphatase-like A domain containing 2	0.43819
axo03595-f_at	7.5e-06	8.05e-07	-14.3076	5.93223	-1.19	B4GALT4	UDP-Gal:betaGlcNAc beta 1,4- galactosyltransferase 4	0.438302
axo06619-f_at	0.00014	3.11e-05	-8.66234	1.86519	-1.18989	CHORDC1	cysteine and histidine-rich domain-containing protein 1 isoform b	0.438336
axo15848-f_at	5.37e-06	5.24e-07	-15.1558	6.40961	-1.1898	UBAP1	ubiquitin associated protein 1	0.438365
axo03139-f_at	7.8e-05	1.54e-05	-9.56021	2.64573	-1.18971	SEC24C	SEC24-related protein C	0.438391
axo10254-r_s_at	2.93e-07	9.13e-09	-25.8981	10.8652	-1.1892	TRA2B	splicing factor, arginine/serine-rich 10	0.438546
axo10731-r_s_at	1.45e-06	8.93e-08	-19.1781	8.36861	-1.18839	SFPQ	splicing factor proline/glutamine rich (polypyrimidine tract binding protein associated)	0.438791
axo13894-f_at	1.86e-05	2.63e-06	-12.1914	4.61349	-1.18815	CYFIP1	cytoplasmic FMR1 interacting protein 1 isoform a	0.438864
axo10648-r_at	1.24e-06	7.16e-08	-19.747	8.61219	-1.18651	MARS	methionyl-tRNA synthetase	0.439363
axo19871-r_at	7.32e-06	7.81e-07	-14.3658	5.96584	-1.18488	TMEM79	transmembrane protein 79	0.43986
axo20643-f_s_at	4.67e-07	1.81e-08	-23.6802	10.1235	-1.1834	TRIM17	tripartite motif-containing 17 isoform 3	0.440314
axo21236-f_at	6.26e-06	6.4e-07	-14.7556	6.18767	-1.18141	NCOA5	nuclear receptor coactivator 5	0.44092
axo16085-f_at	3.13e-05	5.01e-06	-11.1666	3.89687	-1.18067	ZCCHC8	zinc finger, CCHC domain containing 8	0.441147
axo05562-f_at	7.2e-05	1.4e-05	-9.6915	2.7546	-1.18042	NR2C1	nuclear receptor subfamily 2, group C, member 1 isoform c	0.441223
axo16074-f_at	3.55e-05	5.86e-06	-10.9286	3.72202	-1.17998	DIRAS2	Di-Ras2	0.441357
axo01931-f_at	3.75e-05	6.27e-06	-10.8287	3.64754	-1.17979	ZNF398	zinc finger 398 isoform a	0.441416
axo18353-r_at	1.99e-05	2.86e-06	-12.0532	4.52012	-1.17974	XYLT1	xylosyltransferase I	0.441433
axo03191-f_at	1.8e-06	1.22e-07	-18.4066	8.02642	-1.17659	NUDT1	nudix-type motif 1 isoform p22	0.442395
axo09714-f_at	0.000127	2.77e-05	-8.80328	1.99207	-1.17625	IRF7	interferon regulatory factor 7 isoform d	0.442502
axo12190-f_at	9.4e-05	1.92e-05	-9.26742	2.39824	-1.1734	EXOC5	SEC10 protein	0.443376
axo02274-f_at	1.36e-06	8.19e-08	-19.4002	8.46455	-1.17313	C14orf79	hypothetical protein LOC122616	0.443458
axo12579-f_at	3.9e-07	1.41e-08	-24.472	10.3963	-1.17234	UPK1B	uroplakin 1B	0.443701
axo20258-f_at	6.32e-07	2.75e-08	-22.4078	9.66464	-1.17233	CCNB3	cyclin B3 isoform 3	0.443704
axo01421-f_at	1.61e-05	2.2e-06	-12.4908	4.81245	-1.17216	OBFC2A	oligonucleotide/oligosaccharide-binding fold containing 2A	0.443756
axo17822-f_at	1.04e-06	5.58e-08	-20.4077	8.88638	-1.17141	FBXW7	F-box and WD repeat domain containing 7 isoform 3	0.443987
axo13193-f_at	1.39e-05	1.81e-06	-12.8263	5.03024	-1.17123	RAD54B	RAD54 homolog B	0.444044
axo09094-f_at	0.000362	9.69e-05	-7.35359	0.60007	-1.17103	VASP	vasodilator-stimulated phosphoprotein	0.444103
axo18734-f_at	6.54e-05	1.24e-05	-9.85465	2.88816	-1.17101	MBOAT7	membrane bound O-acyltransferase domain containing 7 isoform 1	0.444109
axo07965-f_at	2.82e-06	2.23e-07	-16.9856	7.35717	-1.17005	ID1	inhibitor of DNA binding 1 isoform a	0.444406
axo15666-f_at	3.48e-05	5.7e-06	-10.9708	3.75326	-1.16954	TOB2	transducer of ERBB2, 2	0.444563
axo19684-f_at	1.27e-05	1.62e-06	-13.0245	5.15643	-1.16915	CCNB1	cyclin B1	0.444684
axo01679-f_at	1.53e-05	2.06e-06	-12.6029	4.88585	-1.16902	YTHDF3	YTH domain family, member 3	0.444723
axo12378-f_at	3.81e-07	1.36e-08	-24.5681	10.4288	-1.16764	SC4MOL	sterol-C4-methyl oxidase-like isoform 1	0.445148
axo11317-r_at	4.26e-06	3.87e-07	-15.7808	6.74522	-1.16664	TSPAN3	transmembrane 4 superfamily member 8 isoform 1	0.445458
axo04865-f_at	0.000384	0.000104	-7.28024	0.52413	-1.16443	MRAS	muscle RAS oncogene homolog	0.446139
axo08403-f_at	3.69e-07	1.28e-08	-24.769	10.4962	-1.16425	PIM1	non-specific serine/threonine protein kinase	0.446195
axo08208-f_at	4.4e-05	7.64e-06	-10.5382	3.42757	-1.16421	MSX2	msh homeobox 2	0.446207
axo02037-f_at	9.29e-05	1.9e-05	-9.28723	2.4152	-1.1627	LIN9	lin-9 homolog	0.446676
axo08037-f_at	1.15e-06	6.5e-08	-20.0015	8.71892	-1.1626	KPNA2	karyopherin alpha 2	0.446708
axo19551-f_at	0.000176	4.08e-05	-8.33267	1.5617	-1.1622	PUS3	pseudouridylate synthase 3	0.44683
axo06729-f_at	2.32e-06	1.73e-07	-17.573	7.6403	-1.16128	PRMT3	protein arginine methyltransferase 3 isoform 3	0.447117
axo16246-f_at	0.000317	8.28e-05	-7.52498	0.77532	-1.15925	PXK	PX domain containing serine/threonine kinase	0.447745
axo05844-r_at	5.57e-07	2.31e-08	-22.9184	9.8519	-1.1589	SSFA2	sperm specific antigen 2 isoform 1	0.447855
axo10049-r_at	0.0107	0.00499	-3.8867	-3.72343	-1.15867	DSP	desmoplakin isoform I	0.447925
axo19535-f_at	2.12e-06	1.53e-07	-17.857	7.77386	-1.15844	ADPGK	ADP-dependent glucokinase	0.447998
axo13640-f_at	1.47e-06	9.09e-08	-19.1321	8.3486	-1.1577	CAPN7	calpain 7	0.448227
axo10897-r_at	3.76e-06	3.29e-07	-16.1252	6.92467	-1.15758	ELK3	ELK3 protein	0.448265
axo08015-f_at	1.4e-06	8.52e-08	-19.2976	8.42037	-1.15616	JUN	jun oncogene	0.448705
axo12030-f_at	3.2e-06	2.67e-07	-16.5864	7.15922	-1.15607	IPO7	importin 7	0.448732
axo08786-r_at	2.79e-06	2.19e-07	-17.0292	7.37851	-1.15504	SLC7A1	solute carrier family 7 (cationic amino acid transporter, y+ system), member 1	0.449053
axo01242-f_at	6.12e-07	2.63e-08	-22.5338	9.71126	-1.15388	B3GNT7	UDP-GlcNAc:betaGal beta-1,3-N-acetylglucosaminyltransferase 7	0.449414
axo04236-r_at	8.47e-06	9.52e-07	-13.9893	5.74609	-1.15369	YARS2	tyrosyl-tRNA synthetase 2, mitochondrial	0.449476
axo19380-f_at	1.65e-06	1.08e-07	-18.7044	8.16018	-1.15363	MAP2K2	mitogen-activated protein kinase kinase 2	0.449493
axo09381-f_at	3.69e-06	3.21e-07	-16.1794	6.95257	-1.1501	YARS	tyrosyl-tRNA synthetase	0.450594
axo15384-f_at	6.73e-07	3.01e-08	-22.1375	9.5637	-1.14942	MRPL4	mitochondrial ribosomal protein L4 isoform a	0.450805
axo13843-f_at	8.12e-06	8.99e-07	-14.0968	5.80939	-1.1479	TMOD3	tropomodulin 3 (ubiquitous)	0.451282
axo10425-f_s_at	9.23e-07	4.73e-08	-20.8587	9.06847	-1.14683	COPB2	coatomer protein complex, subunit beta 2 (beta prime)	0.451615
axo10838-f_at	5.02e-05	8.94e-06	-10.3113	3.25198	-1.14558	USP10	ubiquitin specific protease 10	0.452007
axo08446-r_at	6.99e-05	1.34e-05	-9.74378	2.79761	-1.14532	PPM1G	protein phosphatase 1G	0.452088
axo16933-f_at	1.55e-06	9.91e-08	-18.9157	8.25381	-1.14454	2018-09-07	cell division cycle 10 isoform 2	0.452334
axo06988-r_at	3.78e-07	1.35e-08	-24.6138	10.4442	-1.14447	ARHGDIB	Rho GDP dissociation inhibitor (GDI) beta	0.452355
axo01635-f_at	1.49e-05	1.98e-06	-12.6699	4.92941	-1.144	SAMD9L	sterile alpha motif domain containing 9-like	0.452505
axo03204-f_at	0.000124	2.69e-05	-8.83928	2.0242	-1.14368	TH1L	TH1-like protein	0.452605
axo13210-r_s_at	2.34e-06	1.74e-07	-17.5507	7.62973	-1.14092	RSU1	ras suppressor protein 1 isoform 1	0.453471
axo18615-f_at	4.49e-05	7.83e-06	-10.5028	3.40044	-1.14089	CFH	complement factor H isoform b precursor	0.453481
axo06214-r_at	0.00037	9.94e-05	-7.32644	0.57203	-1.1394	EIF2AK2	eukaryotic translation initiation factor 2-alpha kinase 2 isoform b	0.453948
axo06723-f_at	2.11e-06	1.52e-07	-17.877	7.78317	-1.13892	SLC1A5	solute carrier family 1 member 5 isoform 3	0.454099
axo15360-f_at	1.11e-06	6.15e-08	-20.1479	8.77965	-1.13869	C3orf32	hypothetical protein LOC51066	0.454172
axo12556-r_s_at	7.23e-07	3.36e-08	-21.824	9.44505	-1.13799	SFRS1	splicing factor, arginine/serine-rich 1 isoform 1	0.454392
axo15008-f_at	6.22e-07	2.7e-08	-22.4594	9.68377	-1.13779	POLR1A	polymerase (RNA) I polypeptide A, 194kDa	0.454456
axo01736-f_at	8.78e-07	4.39e-08	-21.0622	9.14931	-1.13777	ITGB4	integrin beta 4 isoform 1 precursor	0.454462
axo10539-f_at	2.5e-06	1.9e-07	-17.3543	7.53601	-1.13773	VPS4B	vacuolar protein sorting factor 4B	0.454475
axo14672-f_at	1.75e-06	1.17e-07	-18.51	8.0731	-1.13751	ACSBG1	lipidosin	0.454542
axo03437-f_at	7.02e-05	1.35e-05	-9.73714	2.79216	-1.13559	NCKAP1	NCK-associated protein 1 isoform 2	0.455149
axo05737-r_at	0.00816	0.00364	-4.11877	-3.38332	-1.13468	SRRT	arsenate resistance protein 2 isoform e	0.455435
axo06773-f_at	1.92e-06	1.33e-07	-18.1964	7.93072	-1.13453	OTUD1	OTU domain containing 1	0.455484
axo08954-f_at	6.63e-06	6.86e-07	-14.6175	6.10969	-1.13344	TFAP2C	transcription factor AP-2 gamma	0.455829
axo20139-r_at	6.66e-06	6.91e-07	-14.6035	6.10175	-1.13315	CIRH1A	cirhin	0.45592
axo18979-f_at	1.55e-06	9.87e-08	-18.9252	8.25797	-1.13286	DHRS12	dehydrogenase/reductase (SDR family) member 12 isoform 2	0.456011
axo01770-f_at	1.3e-05	1.67e-06	-12.97	5.12195	-1.13276	TMPO	thymopoietin isoform beta	0.456041
axo02779-f_at	4.81e-06	4.54e-07	-15.4484	6.56832	-1.13268	RNF144B	IBR domain containing 2	0.456069
axo17146-r_at	3.1e-06	2.55e-07	-16.6858	7.20896	-1.13168	FBXW5	F-box and WD repeat domain containing 5	0.456383
axo10426-r_at	1.58e-05	2.15e-06	-12.531	4.83885	-1.13162	COPB2	coatomer protein complex, subunit beta 2 (beta prime)	0.456402
axo18365-f_at	0.000302	7.82e-05	-7.58832	0.83932	-1.13047	RAB38	RAB38	0.456767
axo19586-r_at	1.02e-05	1.22e-06	-13.5302	5.47043	-1.1304	RTP3	transmembrane protein 7	0.456788
axo19578-f_at	7.02e-06	7.39e-07	-14.4725	6.02714	-1.12998	COG3	component of golgi transport complex 3	0.456922
axo04847-f_at	1.2e-05	1.5e-06	-13.1635	5.24387	-1.12778	C10orf26	hypothetical protein LOC54838 isoform 1	0.457619
axo11294-r_at	4.6e-06	4.27e-07	-15.576	6.63667	-1.12746	DNM1L	dynamin 1-like isoform 3	0.457721
axo02759-r_s_at	2.04e-06	1.45e-07	-17.9907	7.83598	-1.12606	PCNA	proliferating cell nuclear antigen	0.458164
axo20049-f_at	0.000179	4.19e-05	-8.3025	1.53344	-1.12599	RBBP6	retinoblastoma-binding protein 6 isoform 3	0.458189
axo06821-f_at	7.07e-06	7.47e-07	-14.4518	6.01526	-1.1256	ZDHHC7	zinc finger, DHHC-type containing 7 isoform 1	0.458312
axo05256-f_at	1.17e-05	1.46e-06	-13.2062	5.27057	-1.12528	DGKZ	diacylglycerol kinase zeta isoform 4	0.458414
axo17745-f_at	8.06e-06	8.87e-07	-14.1227	5.82459	-1.1235	TAOK1	TAO kinase 1	0.45898
axo09021-f_at	6.08e-06	6.17e-07	-14.8277	6.22806	-1.12318	TPP2	tripeptidyl peptidase II	0.45908
axo18239-f_at	4.24e-06	3.85e-07	-15.7905	6.7503	-1.12211	ST14	suppression of tumorigenicity 14	0.459423
axo19856-f_at	3.2e-06	2.66e-07	-16.5952	7.16363	-1.1218	CHCHD5	coiled-coil-helix-coiled-coil-helix domain containing 5	0.459521
axo16327-r_at	9.9e-07	5.22e-08	-20.5875	8.95946	-1.12147	TMEM127	transmembrane protein 127	0.459626
axo15498-f_at	8.5e-05	1.71e-05	-9.42384	2.53127	-1.1212	PPPDE1	PPPDE peptidase domain containing 1	0.459713
axo10415-r_at	1.5e-06	9.37e-08	-19.0576	8.3161	-1.1204	TBRG4	cell cycle progression 2 protein isoform 1	0.459966
axo10259-f_at	0.002	0.000714	-5.42553	-1.60675	-1.11895	PTGS2	prostaglandin-endoperoxide synthase 2 precursor	0.46043
axo20908-f_at	1.83e-05	2.58e-06	-12.2255	4.63639	-1.11893	LGALS4	galectin-4	0.460436
axo11093-r_at	1.55e-05	2.09e-06	-12.5823	4.87241	-1.11871	SMC3	structural maintenance of chromosomes 3	0.460505
axo08179-f_at	1.3e-06	7.71e-08	-19.5558	8.53114	-1.11665	MMP3	matrix metalloproteinase 3 preproprotein	0.461163
axo15784-f_at	1.92e-05	2.74e-06	-12.1238	4.56794	-1.11637		G-2 and S-phase expressed 1	0.461252
axo07975-f_at	8.98e-06	1.03e-06	-13.8456	5.66075	-1.11521	INSM1	insulinoma-associated 1	0.461623
axo16325-f_at	5e-06	4.75e-07	-15.3553	6.51815	-1.1134	C1orf27	hypothetical protein LOC54953	0.462204
axo20778-f_at	2.89e-05	4.54e-06	-11.3191	4.0072	-1.11245	AGFG1	HIV-1 Rev binding protein isoform 3	0.462507
axo04163-f_at	2.97e-06	2.41e-07	-16.8152	7.27325	-1.11099	AIM1L	absent in melanoma 1-like	0.462976
axo12409-f_at	0.000225	5.48e-05	-7.98887	1.23468	-1.1096	QKI	quaking homolog, KH domain RNA binding isoform HQK-5	0.463423
axo03052-r_at	2.16e-06	1.58e-07	-17.7806	7.73812	-1.10847	APOOL	apolipoprotein O-like	0.463786
axo02912-f_at	1.59e-05	2.16e-06	-12.5221	4.83305	-1.10792	SASS6	spindle assembly abnormal protein 6	0.463964
axo17066-f_at	1.83e-05	2.58e-06	-12.2241	4.63544	-1.10695	ABCB4	ATP-binding cassette, subfamily B, member 4 isoform B	0.464274
axo02381-f_at	1.7e-05	2.36e-06	-12.3714	4.73366	-1.10694	RHOT1	ras homolog gene family, member T1 isoform 1	0.464277
axo01989-f_at	0.000479	0.000134	-7.01015	0.23942	-1.10643	CAMK2D	calcium/calmodulin-dependent protein kinase II delta isoform 1	0.464441
axo08046-f_at	2.49e-06	1.89e-07	-17.3671	7.54215	-1.10617	IPO5	importin 5	0.464525
axo13178-f_at	1.2e-05	1.5e-06	-13.1627	5.2434	-1.10614	PITPNB	phosphatidylinositol transfer protein, beta	0.464535
axo00797-r_at	1.36e-06	8.18e-08	-19.4025	8.46553	-1.10486	BCL2L1	BCL2-like 1 isoform 1	0.464947
axo20281-r_at	6.18e-06	6.29e-07	-14.7888	6.20627	-1.10434	LGALS12	lectin, galactoside-binding, soluble, 12 isoform 2	0.465117
axo03692-f_at	7.75e-07	3.72e-08	-21.5313	9.3327	-1.10351	LOC730474	PREDICTED: hypothetical protein, partial	0.465383
axo01297-f_at	4.52e-05	7.9e-06	-10.4898	3.39038	-1.1033	NUF2	NUF2, NDC80 kinetochore complex component	0.465449
axo16574-f_at	2.56e-05	3.9e-06	-11.5553	4.17544	-1.10294	ECT2	epithelial cell transforming sequence 2 oncogene protein	0.465566
axo19008-f_at	0.000529	0.000151	-6.88889	0.10896	-1.10283	SHCBP1	SHC SH2-domain binding protein 1	0.465604
axo09606-f_at	5.68e-06	5.67e-07	-14.997	6.32222	-1.10057	SQSTM1	sequestosome 1 isoform 1	0.466334
axo08632-r_at	1.45e-06	8.96e-08	-19.1705	8.36532	-1.09897	RAD51	RAD51 homolog protein isoform 1	0.466851
axo02453-r_at	4.07e-05	6.94e-06	-10.6779	3.53403	-1.09896	SESTD1	SEC14 and spectrin domains 1	0.466853
axo02299-f_at	1.12e-06	6.21e-08	-20.1227	8.76924	-1.09895	PCSK9	proprotein convertase subtilisin/kexin type 9 preproprotein	0.466856
axo09770-f_at	1.37e-05	1.78e-06	-12.8588	5.0511	-1.09849	STOM	stomatin isoform a	0.467006
axo03112-r_at	0.00107	0.000347	-6.07505	-0.81162	-1.09812	MIA3	melanoma inhibitory activity family, member 3	0.467124
axo07740-f_at	5.36e-06	5.22e-07	-15.1625	6.41327	-1.09791		dual specificity phosphatase 7	0.467192
axo00532-f_s_at	4.1e-06	3.7e-07	-15.8778	6.79614	-1.09756	YTHDC1	splicing factor YT521-B isoform 2	0.467307
axo14693-r_at	0.000116	2.48e-05	-8.94462	2.11762	-1.0972	BAT2D1	HBxAg transactivated protein 2	0.467424
axo08723-f_at	1.64e-06	1.06e-07	-18.7366	8.1745	-1.09705	CYP51A1	cytochrome P450, family 51, subfamily A, polypeptide 1 isoform 1	0.467473
axo17918-f_s_at	1.55e-06	9.83e-08	-18.9358	8.26264	-1.09592	NCOA5	nuclear receptor coactivator 5	0.467836
axo04193-r_at	1.88e-06	1.29e-07	-18.2595	7.95959	-1.09591	LGALS9C	galectin 9 like	0.46784
axo10976-r_at	1.17e-05	1.46e-06	-13.204	5.26918	-1.09515	HAS2	hyaluronan synthase 2	0.468087
axo18823-f_at	8.5e-07	4.2e-08	-21.1905	9.19987	-1.09499	MPZL1	myelin protein zero-like 1 isoform b	0.468141
axo06995-f_at	1.99e-06	1.4e-07	-18.065	7.87034	-1.09463	BCAT2	branched chain aminotransferase 2, mitochondrial	0.468255
axo18371-f_at	2.77e-06	2.17e-07	-17.042	7.38477	-1.09351	NCAPG	chromosome condensation protein G	0.468621
axo20149-f_at	2.91e-06	2.34e-07	-16.8796	7.30506	-1.09248	SPRYD3	SPRY domain containing 3	0.468953
axo19595-f_at	2.22e-06	1.64e-07	-17.6991	7.69988	-1.09237	FAM103A1	hypothetical protein LOC83640	0.468989
axo05295-f_at	7.46e-05	1.46e-05	-9.63469	2.70765	-1.09221	FLNA	filamin A, alpha isoform 2	0.469043
axo10463-f_at	1.27e-05	1.62e-06	-13.0261	5.15746	-1.09168	HS6ST1	heparan sulfate 6-O-sulfotransferase 1	0.469216
axo00700-r_at	6.59e-06	6.81e-07	-14.6316	6.11772	-1.09001	RRM2	ribonucleotide reductase M2 polypeptide	0.469757
axo12002-f_at	0.000159	3.62e-05	-8.477	1.69575	-1.08966	SEC23A	SEC23-related protein A	0.469871
axo09632-r_at	9.53e-05	1.95e-05	-9.24731	2.381	-1.08924	TIMELESS	timeless homolog	0.470008
axo03136-f_at	2.85e-06	2.27e-07	-16.9444	7.33694	-1.08857		sulfatase 2 isoform b precursor	0.470228
axo09909-f_at	9.18e-07	4.67e-08	-20.8941	9.08258	-1.08813	EEF1E1	eukaryotic translation elongation factor 1 epsilon 1 isoform 1	0.47037
axo08896-f_at	2.13e-06	1.54e-07	-17.842	7.76687	-1.08793	RPS6KB1	ribosomal protein S6 kinase, 70kDa, polypeptide 1	0.470436
axo00468-f_at	1.81e-06	1.22e-07	-18.392	8.01982	-1.08789	CHST14	dermatan 4 sulfotransferase 1	0.470448
axo09752-r_at	1.28e-06	7.53e-08	-19.6162	8.55683	-1.08581	CTSS	cathepsin S preproprotein	0.471127
axo02001-f_at	7.26e-07	3.39e-08	-21.7969	9.43471	-1.08563	SPAG1	sperm associated antigen 1	0.471187
axo07951-f_at	1.14e-05	1.4e-06	-13.2751	5.31343	-1.08545	IARS	isoleucyl-tRNA synthetase	0.471246
axo21377-f_s_at	6.78e-07	3.06e-08	-22.0936	9.5472	-1.08519	KRT4	keratin 4	0.47133
axo09483-f_at	5.27e-05	9.51e-06	-10.2234	3.1831	-1.08516	GALNT4	polypeptide N-acetylgalactosaminyltransferase 4	0.471339
axo09196-r_at	5.79e-07	2.44e-08	-22.7624	9.79514	-1.0851	SLC7A5	solute carrier family 7 (cationic amino acid transporter, y+ system), member 5	0.471361
axo14898-r_at	5.46e-06	5.37e-07	-15.1067	6.38267	-1.08463	ARHGEF4	Rho guanine nucleotide exchange factor 4 isoform a	0.471513
axo13803-f_at	3.42e-06	2.91e-07	-16.3955	7.0629	-1.08406	CPM	carboxypeptidase M precursor	0.471701
axo00670-f_at	1.66e-06	1.09e-07	-18.6872	8.15252	-1.08373	DTX3L	deltex 3-like	0.471808
axo12520-r_at	3.26e-06	2.73e-07	-16.5353	7.13355	-1.08292	ADAP1	centaurin, alpha 1	0.472071
axo17774-r_at	1.38e-05	1.8e-06	-12.8333	5.03475	-1.08292	TMEM181	G protein-coupled receptor 178	0.472073
axo19559-f_at	1.67e-06	1.1e-07	-18.665	8.14259	-1.0789	HNRNPD	heterogeneous nuclear ribonucleoprotein D isoform b	0.473388
axo14664-f_at	6.53e-06	6.75e-07	-14.6498	6.12798	-1.07776	RCOR1	REST corepressor 1	0.473764
axo02466-f_at	2.46e-06	1.87e-07	-17.3926	7.55437	-1.07719	OTOP2	otopetrin 2	0.47395
axo02636-f_at	8.62e-07	4.28e-08	-21.1322	9.17695	-1.07555	METTL2A	methyltransferase like 2A	0.474489
axo11423-f_at	3.49e-06	3e-07	-16.3252	7.02719	-1.07548	M6PRBP1	mannose 6 phosphate receptor binding protein 1	0.474515
axo02311-r_at	1.56e-05	2.11e-06	-12.5645	4.86079	-1.07367	HIST3H2BB	histone cluster 3, H2bb	0.475109
axo15173-r_at	2.12e-05	3.1e-06	-11.9226	4.43102	-1.07317	LDLRAP1	low density lipoprotein receptor adaptor protein 1	0.475272
axo00106-r_at	4.03e-05	6.84e-06	-10.7	3.55076	-1.0729	CTDP1	CTD (carboxy-terminal domain, RNA polymerase II, polypeptide A) phosphatase, subunit 1 isoform FCP1b	0.475362
axo09838-f_at	0.000591	0.000172	-6.75811	-0.03363	-1.07262	SEMA3F	semaphorin 3F	0.475456
axo08979-f_at	6.83e-07	3.09e-08	-22.0653	9.53653	-1.07256	TIMP1	tissue inhibitor of metalloproteinase 1 precursor	0.475473
axo10603-f_at	2.85e-05	4.46e-06	-11.3468	4.02712	-1.07214	DDX1	DEAD (Asp-Glu-Ala-Asp) box polypeptide 1	0.475614
axo21362-f_at	4.73e-05	8.34e-06	-10.4113	3.32982	-1.07087	SNX18	sorting nexin 18 isoform c	0.476033
axo13970-r_at	1.03e-05	1.23e-06	-13.5124	5.45962	-1.06708	CLINT1	epsin 4	0.477283
axo14132-f_at	1.77e-05	2.48e-06	-12.2925	4.6812	-1.06707	KIAA0649	1A6/DRIM (down-regulated in metastasis) interacting protein	0.477288
axo07795-f_at	1.57e-06	1.01e-07	-18.8612	8.22975	-1.06652	FBLN1	fibulin 1 isoform C precursor	0.477468
axo17249-f_at	2.14e-06	1.55e-07	-17.8269	7.75978	-1.06553	GTPBP2	GTP binding protein 2	0.477798
axo07656-f_at	1.51e-06	9.53e-08	-19.0136	8.29681	-1.06433	COL9A2	alpha 2 type IX collagen	0.478193
axo08005-f_at	1.5e-06	9.39e-08	-19.0512	8.31328	-1.06429	ITPR3	inositol 1,4,5-triphosphate receptor, type 3	0.478209
axo11372-f_at	8.63e-06	9.75e-07	-13.9437	5.7191	-1.06374	LPAR6	G-protein coupled purinergic receptor P2Y5	0.478391
axo12194-f_at	4.55e-05	7.97e-06	-10.4763	3.38004	-1.06292	IGF2BP1	insulin-like growth factor 2 mRNA binding protein 1	0.478661
axo08965-f_at	1.5e-06	9.46e-08	-19.0327	8.30517	-1.06288	TGM3	transglutaminase 3 precursor	0.478675
axo00941-f_at	1.47e-05	1.96e-06	-12.6933	4.94458	-1.0627	FGD4	FYVE, RhoGEF and PH domain containing 4	0.478736
axo06566-f_at	8.35e-05	1.68e-05	-9.44801	2.55166	-1.0619	EPX	eosinophil peroxidase	0.479001
axo07657-f_at	1.24e-06	7.13e-08	-19.7568	8.61635	-1.06167	COL9A3	alpha 3 type IX collagen	0.479079
axo05033-f_at	2.92e-06	2.35e-07	-16.8699	7.30026	-1.06164	CCNK	cyclin K isoform 1	0.479089
axo13386-f_at	1.58e-05	2.15e-06	-12.5336	4.84054	-1.06133	ST8SIA6	ST8 alpha-N-acetyl-neuraminide alpha-2,8-sialyltransferase 6	0.479189
axo02805-f_at	0.000132	2.9e-05	-8.74591	1.94063	-1.06119	SYNE2	spectrin repeat containing, nuclear envelope 2 isoform 5	0.479238
axo10353-f_at	6.97e-07	3.17e-08	-21.9846	9.50606	-1.0599	SLC16A6	solute carrier family 16, member 6	0.479664
axo20838-f_s_at	1.05e-06	5.63e-08	-20.3818	8.87583	-1.05988	HMGB3	high-mobility group box 3	0.479671
axo08186-f_at	1.02e-05	1.21e-06	-13.5396	5.47621	-1.05892	MMP13	matrix metalloproteinase 13 preproprotein	0.479991
axo01381-f_at	5.18e-06	4.99e-07	-15.257	6.46484	-1.05886	OTOS	otospiralin	0.48001
axo07376-f_at	1.1e-05	1.34e-06	-13.362	5.36725	-1.05776	IGSF1	immunoglobulin superfamily, member 1 isoform 1	0.480378
axo15553-f_at	1.78e-06	1.19e-07	-18.4556	8.04856	-1.05756	MYEF2	myelin expression factor 2	0.480444
axo04262-r_at	0.000332	8.77e-05	-7.46256	0.71186	-1.05738	PPAN-P2RY11	PPAN-P2RY11 protein	0.480503
axo07135-f_at	3.29e-06	2.77e-07	-16.5051	7.11835	-1.05658	DAPK3	death-associated protein kinase 3	0.480772
axo20850-f_s_at	4.78e-06	4.49e-07	-15.4705	6.58024	-1.05561	HMGN2	high-mobility group nucleosomal binding domain 2	0.481093
axo10695-f_at	7.75e-06	8.45e-07	-14.2154	5.87873	-1.05481	SERPINB10	serine (or cysteine) proteinase inhibitor, clade B (ovalbumin), member 10	0.48136
axo02253-f_at	0.000102	2.14e-05	-9.13128	2.2809	-1.0541	YIPF6	Yip1 domain family, member 6	0.481599
axo17366-f_at	4.65e-06	4.33e-07	-15.5461	6.62071	-1.05268	STARD7	START domain containing 7	0.482072
axo13692-f_at	1.64e-06	1.06e-07	-18.7375	8.17493	-1.05234	TNFAIP8	tumor necrosis factor, alpha-induced protein 8 isoform a	0.482185
axo17277-f_at	0.0114	0.00537	-3.83295	-3.80319	-1.05146	ITSN2	intersectin 2 isoform 3	0.48248
axo11178-r_at	8.62e-07	4.28e-08	-21.1368	9.17874	-1.05116	KRT6A	keratin 6A	0.482579
axo00761-f_at	2.06e-06	1.47e-07	-17.9506	7.8174	-1.05115	REP15	RAB15 effector protein	0.482582
axo16337-r_at	7.43e-07	3.51e-08	-21.6986	9.39708	-1.05055	C4orf27	hypothetical protein LOC54969	0.482783
axo13529-f_at	3.63e-05	6.02e-06	-10.8884	3.69208	-1.05009	CHMP4A	chromatin modifying protein 4A	0.482937
axo05330-r_at	5.65e-06	5.63e-07	-15.0123	6.33067	-1.04955	BRD2	bromodomain containing 2	0.483118
axo18848-f_at	0.000353	9.42e-05	-7.38404	0.63143	-1.04893	CHMP6	chromatin modifying protein 6	0.483328
axo11416-r_at	7.66e-07	3.65e-08	-21.5828	9.35256	-1.04879	DDX39	DEAD (Asp-Glu-Ala-Asp) box polypeptide 39	0.483374
axo05927-r_at	0.00175	0.000612	-5.56091	-1.43635	-1.04867	HYOU1	hypoxia up-regulated 1 precursor	0.483413
axo18496-f_at	4.93e-06	4.68e-07	-15.3881	6.53589	-1.04814	MFSD1	major facilitator superfamily domain containing 1	0.483591
axo19300-f_at	1.27e-05	1.62e-06	-13.0253	5.15695	-1.04798	TRABD	TraB domain containing	0.483646
axo12794-r_at	7.33e-07	3.43e-08	-21.7621	9.42143	-1.04795	CA5B	carbonic anhydrase VB, mitochondrial precursor	0.483654
axo10093-r_at	2.84e-06	2.24e-07	-16.971	7.35001	-1.04742	ACSL4	acyl-CoA synthetase long-chain family member 4 isoform 1	0.483832
axo18637-r_at	0.000283	7.2e-05	-7.67959	0.93081	-1.0467	SPATS2	spermatogenesis associated, serine-rich 2	0.484074
axo00414-r_at	1.88e-06	1.29e-07	-18.2703	7.96451	-1.04641	IFITM5	interferon induced transmembrane protein 5	0.484173
axo04510-f_at	0.000108	2.29e-05	-9.0457	2.20639	-1.04583	SEC31A	SEC31 homolog A isoform 3	0.484365
axo12199-f_s_at	6.18e-06	6.29e-07	-14.79	6.20696	-1.04566	KHDRBS1	KH domain containing, RNA binding, signal transduction associated 1	0.484423
axo07585-f_at	5.42e-06	5.32e-07	-15.1266	6.39362	-1.04544	CD69	CD69 molecule	0.484498
axo10941-f_at	4.01e-06	3.6e-07	-15.935	6.826	-1.04542	GJB5	gap junction protein, beta 5, 31.1kDa	0.484504
axo20305-r_at	0.000137	3.03e-05	-8.69344	1.89333	-1.04422	CALD1	caldesmon 1 isoform 5	0.484908
axo09699-r_at	6.26e-05	1.17e-05	-9.92915	2.9485	-1.04411	AIP	aryl hydrocarbon receptor interacting protein	0.484945
axo05697-f_at	2.57e-06	1.97e-07	-17.2682	7.49456	-1.04375	C13orf31	hypothetical protein LOC144811	0.485064
axo06885-f_at	3.02e-06	2.46e-07	-16.7691	7.25038	-1.04279	PARP9	poly (ADP-ribose) polymerase family, member 9 isoform b	0.485388
axo11853-f_at	4.57e-06	4.24e-07	-15.5933	6.6459	-1.04278	PPARD	peroxisome proliferative activated receptor, delta isoform 1	0.485393
axo12218-f_at	0.00586	0.00248	-4.40798	-2.96951	-1.04269	AVIL	advillin	0.485422
axo12244-f_at	1.32e-06	7.91e-08	-19.4868	8.50167	-1.04223	HSPA8	heat shock 70kDa protein 8 isoform 1	0.485576
axo11230-r_at	1.6e-05	2.18e-06	-12.5119	4.82633	-1.04178	REST	RE1-silencing transcription factor	0.485728
axo07989-f_at	2.2e-05	3.25e-06	-11.8476	4.37942	-1.04156	ITGAV	integrin alpha-V isoform 1 precursor	0.4858
axo17801-f_at	9.63e-06	1.13e-06	-13.6756	5.55872	-1.04062	BCAM	basal cell adhesion molecule isoform 2 precursor	0.48612
axo21367-f_at	5.28e-05	9.54e-06	-10.2198	3.18025	-1.04036	EXOSC6	homolog of yeast mRNA transport regulator 3	0.486208
axo04768-f_at	2.88e-06	2.3e-07	-16.9157	7.32285	-1.03972	C15orf57	coiled-coil domain containing 32 isoform b	0.486422
axo10558-f_at	1.3e-06	7.69e-08	-19.5616	8.5336	-1.03962	SPAG7	sperm associated antigen 7	0.486457
axo16970-f_at	1.32e-06	7.85e-08	-19.5078	8.51064	-1.03879	TMEM44	transmembrane protein 44 isoform b	0.486735
axo14833-f_at	4.73e-06	4.43e-07	-15.5014	6.5968	-1.03848	SPOP	speckle-type POZ protein	0.486842
axo16931-r_at	2.9e-06	2.33e-07	-16.8857	7.3081	-1.03823	NUSAP1	nucleolar and spindle associated protein 1 isoform 2	0.486923
axo19342-f_at	0.000134	2.94e-05	-8.73002	1.92633	-1.03773	MATN2	matrilin 2 isoform b precursor	0.487095
axo18950-f_at	1.18e-05	1.47e-06	-13.1904	5.26073	-1.03756	E2F8	E2F family member 8	0.48715
axo06179-f_at	9.16e-06	1.06e-06	-13.7912	5.62825	-1.0374	TCOF1	Treacher Collins-Franceschetti syndrome 1 isoform f	0.487203
axo19220-f_s_at	0.000107	2.25e-05	-9.06531	2.22352	-1.0373	ZXDC	ZXD family zinc finger C isoform 1	0.487239
axo11771-r_at	1.24e-06	7.2e-08	-19.7327	8.60616	-1.03707	2018-09-02	septin 2	0.487317
axo06865-f_at	9.03e-07	4.56e-08	-20.9597	9.1087	-1.03603	DLGAP5	discs large homolog 7 isoform b	0.487667
axo21448-f_at	1.37e-06	8.22e-08	-19.3893	8.45987	-1.03494	TPM3	tropomyosin 3 isoform 2	0.488036
axo07032-f_at	1.12e-06	6.19e-08	-20.1299	8.77223	-1.03473	CCNA2	cyclin A	0.488107
axo19761-f_at	0.000145	3.26e-05	-8.603	1.81128	-1.03428	DSEL	dermatan sulfate epimerase-like	0.48826
axo19470-f_at	3.16e-06	2.62e-07	-16.6276	7.17987	-1.03349	CDT1	chromatin licensing and DNA replication factor 1	0.488528
axo15231-r_at	1.02e-06	5.4e-08	-20.4945	8.92177	-1.03207	CPAMD8	C3 and PZP-like, alpha-2-macroglobulin domain containing 8	0.489009
axo10692-r_s_at	4.75e-06	4.46e-07	-15.4855	6.58827	-1.03207	PFN1	profilin 1	0.489009
axo15501-r_at	7.78e-05	1.54e-05	-9.56373	2.64867	-1.03186	FAM18B	hypothetical protein LOC51030	0.48908
axo12208-r_at	2.17e-05	3.2e-06	-11.8746	4.39801	-1.03162	FARS2	phenylalanyl-tRNA synthetase 2 precursor	0.48916
axo07605-f_at	0.000258	6.43e-05	-7.80628	1.05643	-1.03137	CDO1	cysteine dioxygenase	0.489244
axo10649-f_at	0.000264	6.63e-05	-7.77199	1.02259	-1.03135	MARS	methionyl-tRNA synthetase	0.489253
axo02500-f_at	1.47e-05	1.95e-06	-12.695	4.94568	-1.03063	FAM83C	hypothetical protein LOC128876	0.489496
axo12206-f_at	3.89e-05	6.58e-06	-10.7575	3.59411	-1.03048	FARS2	phenylalanyl-tRNA synthetase 2 precursor	0.489548
axo19890-f_s_at	1.8e-06	1.21e-07	-18.412	8.02886	-1.02992	MRPL45	mitochondrial ribosomal protein L45	0.489736
axo09420-f_at	1.65e-05	2.26e-06	-12.4479	4.78425	-1.02941	IL1R1	interleukin 1 receptor, type I precursor	0.489911
axo18272-r_at	1.99e-06	1.4e-07	-18.0641	7.86992	-1.02881	C14orf133	hypothetical protein LOC63894	0.490113
axo11578-r_s_at	1.2e-06	6.8e-08	-19.8807	8.66842	-1.02735	HNRNPM	heterogeneous nuclear ribonucleoprotein M isoform a	0.490612
axo13272-f_at	1.94e-05	2.79e-06	-12.0987	4.55098	-1.02616	DNAJC15	DNAJ domain-containing	0.491017
axo18486-r_at	3.26e-06	2.74e-07	-16.5299	7.13086	-1.02263	ELOVL4	elongation of very long chain fatty acids-like 4	0.492218
axo12561-r_at	0.000117	2.51e-05	-8.92585	2.10103	-1.02177	SILV	silver homolog	0.492513
axo03123-f_at	1.3e-06	7.71e-08	-19.5537	8.53024	-1.02063	GJB7	gap junction protein, beta 7, 25kDa	0.4929
axo03469-r_at	1.38e-06	8.35e-08	-19.3502	8.44306	-1.02037	SLC25A29	solute carrier family 25, member 29	0.492991
axo15804-f_at	2.63e-05	4.04e-06	-11.5002	4.13647	-1.01888	CUL4A	cullin 4A isoform 1	0.493498
axo07756-f_at	3.96e-06	3.53e-07	-15.975	6.84683	-1.01876	EGR1	early growth response 1	0.49354
axo11409-f_at	0.000281	7.12e-05	-7.69123	0.94243	-1.01855	USPL1	ubiquitin specific peptidase like 1	0.493611
axo14190-f_at	1.38e-05	1.8e-06	-12.8364	5.03674	-1.01804	NCAPD2	non-SMC condensin I complex, subunit D2	0.493787
axo00511-f_at	0.000134	2.94e-05	-8.72798	1.92449	-1.01796	WIPF2	WIRE protein	0.493813
axo00636-f_at	8.12e-06	8.99e-07	-14.0965	5.80924	-1.01746	TANK	TRAF interacting protein TANK isoform b	0.493987
axo00098-f_at	7.57e-06	8.18e-07	-14.277	5.9145	-1.01548	COL4A6	type IV alpha 6 collagen isoform B precursor	0.494664
axo07700-f_at	1.44e-05	1.91e-06	-12.7351	4.97158	-1.01348	CTGF	connective tissue growth factor	0.495348
axo09088-f_at	1.06e-05	1.28e-06	-13.4459	5.41891	-1.01332	USP4	ubiquitin specific protease 4 isoform a	0.495404
axo00827-r_at	6.97e-06	7.33e-07	-14.4897	6.03695	-1.01332	C19orf22	hypothetical protein LOC91300	0.495406
axo12178-r_at	0.000134	2.94e-05	-8.73033	1.92661	-1.01322	ELL	elongation factor RNA polymerase II	0.495439
axo15561-r_at	2.79e-06	2.19e-07	-17.0235	7.37575	-1.01226	NSFL1C	p47 protein isoform a	0.495769
axo19547-f_at	0.000602	0.000175	-6.73623	-0.05767	-1.01166	CDCA3	cell division cycle associated 3	0.495975
axo17303-f_at	2.54e-06	1.93e-07	-17.3088	7.51414	-1.01121	ABCB9	ATP-binding cassette, sub-family B (MDR/TAP), member 9 isoform 2	0.496129
axo13090-f_at	7.07e-06	7.48e-07	-14.4502	6.01434	-1.00927	G3BP2	Ras-GTPase activating protein SH3 domain-binding protein 2 isoform a	0.496797
axo02335-f_at	2.63e-06	2.04e-07	-17.1925	7.45798	-1.00926	PPM1B	protein phosphatase 1B isoform 5	0.496801
axo04623-r_at	1.47e-06	9.11e-08	-19.1275	8.34657	-1.00926	GPR64	G protein-coupled receptor 64 isoform 3	0.496802
axo18940-f_at	1.5e-05	2.01e-06	-12.6463	4.91408	-1.00789	ESCO2	establishment of cohesion 1 homolog 2	0.497272
axo14870-r_at	2.05e-05	2.98e-06	-11.9908	4.4777	-1.00779	HAUS5	HAUS augmin-like complex, subunit 5	0.497308
axo10613-r_at	1.79e-06	1.2e-07	-18.4362	8.03982	-1.00757	EPYC	dermatan sulfate proteoglycan 3 precursor	0.497382
axo18699-f_at	0.000302	7.79e-05	-7.59138	0.84241	-1.00722	PRRG4	proline rich Gla (G-carboxyglutamic acid) 4 (transmembrane)	0.497503
axo17535-f_at	1.38e-06	8.29e-08	-19.3665	8.45007	-1.00649	NUP107	nucleoporin 107kDa	0.497755
axo18984-r_at	1.67e-05	2.31e-06	-12.4081	4.75795	-1.00575	C15orf29	hypothetical protein LOC79768	0.498012
axo13649-f_at	1.6e-06	1.04e-07	-18.8017	8.20342	-1.00443	PES1	pescadillo homolog 1, containing BRCT domain	0.498467
axo15874-f_at	8.38e-06	9.36e-07	-14.0212	5.76495	-1.00412	TLR7	toll-like receptor 7	0.498574
axo15320-f_at	1.96e-06	1.37e-07	-18.1227	7.89692	-1.00402	UMOD	uromodulin precursor	0.498609
axo03617-f_at	0.000128	2.8e-05	-8.79227	1.98222	-1.00379		5-hydroxytryptamine (serotonin) receptor 3A isoform a precursor	0.498688
axo13629-r_at	5.92e-06	5.97e-07	-14.8932	6.26458	-1.00379	TDRD7	tudor domain containing 7	0.498689
axo04765-f_at	2.56e-05	3.89e-06	-11.5597	4.17861	-1.00294	SPI1	hematopoietic transcription factor PU.1 isoform 1	0.498981
axo08809-r_at	1.27e-06	7.49e-08	-19.6279	8.56177	-1.00277	SMARCB1	SWI/SNF related, matrix associated, actin dependent regulator of chromatin, subfamily b, member 1 isoform a	0.499041
axo12433-f_at	1.45e-05	1.92e-06	-12.7263	4.96589	-1.00247	PRSS21	testisin isoform 1	0.499146
axo05071-f_at	3.59e-06	3.11e-07	-16.2517	6.98965	-1.00167	CYP4B1	cytochrome P450, family 4, subfamily B, polypeptide 1 isoform a	0.499423
axo18338-r_at	2.28e-06	1.68e-07	-17.6328	7.66859	-1.00141	CENPK	SoxLZ/Sox6 leucine zipper binding protein	0.499511
axo10913-f_at	1.46e-06	9.03e-08	-19.1484	8.35571	-1.00051	EWSR1	Ewing sarcoma breakpoint region 1 isoform EWS	0.499824
axo01967-f_x_at	8.42e-06	9.45e-07	-14.0023	5.7538	-0.999187	TRIM39	tripartite motif-containing 39 isoform 2	0.500282
axo10894-f_at	2.94e-06	2.37e-07	-16.8457	7.28835	-0.99892	EGFR	epidermal growth factor receptor isoform a precursor	0.500375
axo14675-f_at	1.26e-06	7.37e-08	-19.6726	8.58076	-0.99837	ACSBG1	lipidosin	0.500565
axo07934-r_s_at	1.12e-06	6.19e-08	-20.1315	8.77289	-0.998245	HNRNPK	heterogeneous nuclear ribonucleoprotein K isoform a	0.500609
axo15204-f_at	8.41e-06	9.43e-07	-14.0076	5.75693	-0.99789	NOC2L	nucleolar complex associated 2 homolog	0.500732
axo17023-f_at	2.08e-06	1.49e-07	-17.9164	7.80153	-0.997181	ANLN	anillin, actin binding protein	0.500978
axo00197-r_at	0.00104	0.000337	-6.10157	-0.78033	-0.997178	GBP4	guanylate binding protein 4	0.500979
axo16536-f_at	8.94e-06	1.02e-06	-13.8553	5.66653	-0.99694	HELLS	helicase, lymphoid-specific	0.501062
axo11057-r_at	3.32e-06	2.8e-07	-16.4776	7.10449	-0.996557	SHMT2	serine hydroxymethyltransferase 2 (mitochondrial)	0.501195
axo07118-f_at	7.26e-07	3.38e-08	-21.805	9.43778	-0.996403	CSTF2	cleavage stimulation factor subunit 2	0.501248
axo05309-r_at	6.42e-05	1.21e-05	-9.8877	2.91497	-0.995979	DDX54	DEAD (Asp-Glu-Ala-Asp) box polypeptide 54 isoform 1	0.501395
axo02394-f_at	1.69e-05	2.34e-06	-12.3885	4.74497	-0.995875	MIDN	midnolin	0.501432
axo12941-f_s_at	3.49e-06	3e-07	-16.3276	7.02839	-0.99571	PRDX5	peroxiredoxin 5 isoform a precursor	0.501489
axo18341-f_at	5.51e-06	5.44e-07	-15.0788	6.36734	-0.99519	TMBIM1	transmembrane BAX inhibitor motif containing 1	0.50167
axo06166-f_at	1.28e-05	1.63e-06	-13.0067	5.14521	-0.995058	AGFG1	HIV-1 Rev binding protein isoform 4	0.501716
axo09982-f_at	9.73e-07	5.1e-08	-20.6504	8.98487	-0.994802	CAMP	cathelicidin antimicrobial peptide	0.501805
axo07456-r_at	1.85e-06	1.25e-07	-18.334	7.99348	-0.99454	APCS	serum amyloid P component precursor	0.501896
axo15655-f_at	1.49e-06	9.32e-08	-19.0706	8.32174	-0.994219	YTHDF2	high glucose-regulated protein 8	0.502007
axo01563-r_at	3.53e-06	3.04e-07	-16.3003	7.0145	-0.992038	BTNL9	butyrophilin-like 9	0.502767
axo09183-f_at	2.39e-05	3.57e-06	-11.6959	4.27416	-0.991955	STAM	signal transducing adaptor molecule 1	0.502796
axo11379-r_at	7.13e-06	7.56e-07	-14.4282	6.00172	-0.991205	SORBS3	sorbin and SH3 domain containing 3 isoform 1	0.503057
axo19097-r_at	1.03e-06	5.48e-08	-20.4578	8.90683	-0.991107	NOL10	nucleolar protein 10	0.503092
axo07587-r_at	1.69e-06	1.12e-07	-18.6131	8.11941	-0.990379	CDC2	cell division cycle 2 isoform 1	0.503346
axo16345-f_at	1.31e-05	1.68e-06	-12.9583	5.11453	-0.988817	CPSF3L	cleavage and polyadenylation specific factor 3-like	0.503891
axo05068-f_at	1.15e-06	6.44e-08	-20.0259	8.72908	-0.988406	CYP4B1	cytochrome P450, family 4, subfamily B, polypeptide 1 isoform a	0.504034
axo07559-r_at	1.85e-05	2.61e-06	-12.2066	4.62369	-0.988136	CALB2	calbindin 2 isoform 1	0.504129
axo18539-f_at	7.29e-05	1.42e-05	-9.67154	2.73813	-0.9874	CERK	ceramide kinase	0.504386
axo02383-f_at	7.9e-06	8.64e-07	-14.1735	5.85428	-0.986713	SULT1C2	sulfotransferase family, cytosolic, 1C, member 1 isoform b	0.504626
axo19505-r_at	3.89e-06	3.45e-07	-16.0289	6.87486	-0.986031	ISG20L2	interferon stimulated exonuclease gene 20kDa-like 2	0.504865
axo19101-r_at	2.77e-06	2.17e-07	-17.0431	7.38532	-0.985018	DENND2D	DENN/MADD domain containing 2D	0.505219
axo08945-f_at	8.76e-05	1.77e-05	-9.37453	2.48954	-0.984362	TDG	thymine-DNA glycosylase	0.505449
axo18797-r_at	3.03e-05	4.8e-06	-11.2343	3.94604	-0.983998	GPR172A	G protein-coupled receptor 172A	0.505577
axo20182-f_at	2.44e-06	1.84e-07	-17.4223	7.56856	-0.983331	NUDCD1	NudC domain containing 1 isoform 1	0.50581
axo00360-f_at	3.6e-05	5.96e-06	-10.9046	3.70415	-0.982679		AP1 gamma subunit binding protein 1 isoform 2	0.506039
axo20287-r_at	3.85e-05	6.49e-06	-10.7773	3.60903	-0.98233	PNPT1	polyribonucleotide nucleotidyltransferase 1	0.506161
axo02243-f_at	3.2e-06	2.66e-07	-16.592	7.16202	-0.982155	C3orf38	hypothetical protein LOC285237	0.506223
axo02479-f_at	2.36e-06	1.77e-07	-17.5158	7.61315	-0.98203	SERINC5	developmentally regulated protein TPO1	0.506267
axo15507-f_at	1.65e-06	1.08e-07	-18.7112	8.1632	-0.981903	PALLD	palladin	0.506312
axo07027-r_at	2.45e-06	1.85e-07	-17.4145	7.56483	-0.981671	CAV2	caveolin 2 isoform a and b	0.506393
axo03329-f_at	2.74e-06	2.14e-07	-17.0804	7.40351	-0.98061	RAB5C	RAB5C, member RAS oncogene family isoform a	0.506766
axo10520-f_at	4.86e-05	8.6e-06	-10.3672	3.29556	-0.979665	KIF23	kinesin family member 23 isoform 2	0.507097
axo12097-f_at	0.000488	0.000137	-6.98695	0.21458	-0.979545	SMC2	structural maintenance of chromosomes 2	0.50714
axo01137-r_at	1.77e-05	2.47e-06	-12.3005	4.68656	-0.979396	ZDHHC15	zinc finger, DHHC-type containing 15 isoform 1	0.507192
axo12578-f_at	0.000821	0.000253	-6.37599	-0.4618	-0.9785	TAF5	TBP-associated factor 5	0.507507
axo20138-r_at	7.57e-06	8.17e-07	-14.2791	5.91572	-0.976704	CIRH1A	cirhin	0.508139
axo10085-r_at	2.69e-06	2.09e-07	-17.13	7.42767	-0.976521	PRIM1	DNA primase polypeptide 1	0.508204
axo16622-r_at	1.96e-05	2.82e-06	-12.0801	4.53838	-0.975429	KLHL11	kelch-like 11	0.508588
axo11090-f_at	2.86e-06	2.28e-07	-16.9376	7.33363	-0.974293	RQCD1	RCD1 required for cell differentiation1 homolog	0.508989
axo13324-f_at	6.36e-06	6.53e-07	-14.7151	6.16489	-0.97416	RBM15B	RNA binding motif protein 15B	0.509036
axo07873-f_at	0.000439	0.000121	-7.11621	0.35217	-0.973533	GNAQ	guanine nucleotide binding protein (G protein), q polypeptide	0.509257
axo02595-r_at	8.41e-07	4.13e-08	-21.2375	9.2183	-0.973473	RFC2	replication factor C 2 isoform 1	0.509278
axo16877-f_at	2.09e-06	1.5e-07	-17.9014	7.79453	-0.973274	PDLIM5	PDZ and LIM domain 5 isoform b	0.509349
axo17641-r_at	5.26e-06	5.08e-07	-15.2194	6.44436	-0.971241	LRRC47	leucine rich repeat containing 47	0.510067
axo20777-f_at	1.69e-06	1.11e-07	-18.626	8.12517	-0.971097	HNRNPC	heterogeneous nuclear ribonucleoprotein C isoform b	0.510118
axo02827-r_s_at	1.25e-06	7.23e-08	-19.7219	8.6016	-0.968881	ZNF326	zinc finger protein 326 isoform 1	0.510902
axo02051-f_at	0.000174	4.04e-05	-8.34325	1.57159	-0.968842	NR4A3	nuclear receptor subfamily 4, group A, member 3 isoform b	0.510916
axo15157-f_at	4.93e-06	4.67e-07	-15.3908	6.53732	-0.968445	HERC4	hect domain and RLD 4 isoform b	0.511057
axo02200-r_at	1.19e-05	1.48e-06	-13.1858	5.25781	-0.968342	HARBI1	harbinger transposase derived 1	0.511093
axo15184-f_s_at	1.37e-05	1.78e-06	-12.8523	5.04691	-0.967611	SERBP1	SERPINE1 mRNA binding protein 1 isoform 4	0.511352
axo00759-r_at	1.47e-05	1.95e-06	-12.6998	4.94879	-0.967462	HAUS1	coiled-coil domain containing 5	0.511405
axo12620-r_at	9.31e-06	1.08e-06	-13.7547	5.60631	-0.965696	TLE4	transducin-like enhancer protein 4	0.512031
axo04272-f_at	5.34e-05	9.68e-06	-10.199	3.16384	-0.965584	ALAD	delta-aminolevulinic acid dehydratase	0.512071
axo14639-f_at	0.00186	0.00066	-5.49393	-1.52034	-0.965291	ZNF182	zinc finger protein 21 isoform 2	0.512175
axo12983-r_at	2.65e-05	4.08e-06	-11.4868	4.12702	-0.96516	EHF	ets homologous factor	0.512221
axo01743-f_at	4.46e-06	4.11e-07	-15.6575	6.68	-0.964807	APCDD1	adenomatosis polyposis coli down-regulated 1	0.512347
axo16087-f_at	0.000187	4.4e-05	-8.24281	1.47729	-0.964272	ZCCHC8	zinc finger, CCHC domain containing 8	0.512537
axo14648-r_at	1.6e-05	2.19e-06	-12.4999	4.81845	-0.963678	METAP1	methionyl aminopeptidase 1	0.512748
axo20150-f_at	3.08e-06	2.52e-07	-16.7115	7.22178	-0.96328	TMEM209	transmembrane protein 209	0.512889
axo15867-f_at	9.57e-05	1.97e-05	-9.23906	2.37392	-0.962585	TM7SF3	transmembrane 7 superfamily member 3	0.513137
axo16344-r_at	2.06e-06	1.48e-07	-17.9434	7.81408	-0.961444	CPSF3L	cleavage and polyadenylation specific factor 3-like	0.513543
axo11127-f_at	6.22e-05	1.16e-05	-9.94107	2.95812	-0.961439	ITGA3	integrin alpha 3 isoform b precursor	0.513544
axo05984-r_at	7.46e-06	8.01e-07	-14.3182	5.93838	-0.960899	CDC7	cell division cycle 7	0.513737
axo19105-f_at	1.67e-05	2.31e-06	-12.4125	4.7609	-0.960696	GRHL2	transcription factor CP2-like 3	0.513809
axo18743-f_at	7.78e-05	1.54e-05	-9.56326	2.64827	-0.960527	MFSD11	major facilitator superfamily domain containing 11	0.513869
axo20317-r_at	4.57e-06	4.23e-07	-15.5955	6.64705	-0.959727	BAT4	HLA-B associated transcript 4	0.514154
axo07715-f_at	1.21e-05	1.51e-06	-13.1406	5.22953	-0.959348	DCT	dopachrome tautomerase isoform 1	0.514289
axo09449-f_at	0.0085	0.00382	-4.08379	-3.43413	-0.958529	EIF3A	eukaryotic translation initiation factor 3, subunit 10 theta, 150/170kDa	0.514581
axo19851-f_s_at	1.15e-05	1.43e-06	-13.2421	5.29293	-0.958385	HSDL2	hydroxysteroid dehydrogenase like 2	0.514633
axo05374-f_at	1.78e-05	2.5e-06	-12.2812	4.67363	-0.958025	LSM14A	LSM14 homolog A isoform a	0.514761
axo06555-r_at	2.32e-05	3.46e-06	-11.7456	4.30876	-0.957999	MAPRE2	microtubule-associated protein, RP/EB family, member 2 isoform 3	0.51477
axo15491-r_at	0.000102	2.12e-05	-9.14335	2.29136	-0.957951	NUPL1	nucleoporin like 1 isoform c	0.514788
axo09089-f_at	1.66e-05	2.29e-06	-12.4253	4.76933	-0.957357	USP4	ubiquitin specific protease 4 isoform a	0.514999
axo06131-f_at	1.15e-05	1.42e-06	-13.2555	5.30126	-0.957141	MAT1A	methionine adenosyltransferase I, alpha	0.515077
axo04456-f_at	1.71e-05	2.38e-06	-12.3586	4.72517	-0.9563	TOP2A	DNA topoisomerase II, alpha isozyme	0.515377
axo10082-f_at	2.71e-06	2.12e-07	-17.1032	7.41465	-0.956263	EPRS	glutamyl-prolyl tRNA synthetase	0.51539
axo06236-r_at	7.73e-05	1.52e-05	-9.5749	2.65797	-0.956031	TP53INP1	tumor protein p53 inducible nuclear protein 1 isoform b	0.515473
axo20887-f_s_at	1.56e-06	9.98e-08	-18.8991	8.24645	-0.955056	HNRNPM	heterogeneous nuclear ribonucleoprotein M isoform a	0.515821
axo03332-f_at	2.94e-06	2.38e-07	-16.8424	7.28671	-0.954994	PPHLN1	periphilin 1 isoform 4	0.515844
axo11479-r_at	1.09e-05	1.32e-06	-13.384	5.38081	-0.954973	KATNB1	katanin p80 subunit B 1	0.515851
axo00679-f_at	6.85e-05	1.31e-05	-9.77475	2.82299	-0.954851	JOSD2	Josephin domain containing 2	0.515895
axo09709-f_at	2.77e-05	4.3e-06	-11.4036	4.0678	-0.953561	DMD	dystrophin Dp427m isoform	0.516357
axo00208-f_at	6.63e-06	6.88e-07	-14.6133	6.1073	-0.953436	RBP7	retinol binding protein 7, cellular	0.516401
axo05395-f_at	4.32e-05	7.47e-06	-10.5707	3.45244	-0.953028	MVK	mevalonate kinase	0.516547
axo02750-f_at	0.000326	8.54e-05	-7.4906	0.74042	-0.9527	RPL14	ribosomal protein L14	0.516665
axo20226-f_at	7.94e-05	1.57e-05	-9.53155	2.62179	-0.95117	SYTL2	synaptotagmin-like 2 isoform a	0.517213
axo01730-f_at	1.87e-06	1.27e-07	-18.2971	7.97672	-0.95014	RBM45	RNA binding motif protein 45	0.517582
axo18012-f_at	1.15e-05	1.43e-06	-13.2418	5.29278	-0.949188	COL14A1	collagen, type XIV, alpha 1	0.517924
axo12845-f_at	9.33e-06	1.08e-06	-13.751	5.60409	-0.947996	OIP5	Opa interacting protein 5	0.518352
axo06127-r_at	1.87e-06	1.28e-07	-18.281	7.9694	-0.947905	FIP1L1	FIP1 like 1 isoform 3	0.518385
axo01769-f_at	5.32e-06	5.15e-07	-15.19	6.42833	-0.947247	TMPO	thymopoietin isoform beta	0.518621
axo14439-f_at	5.23e-06	5.04e-07	-15.2352	6.45297	-0.946921	SDC1	syndecan 1 precursor	0.518738
axo06663-f_at	1.17e-05	1.46e-06	-13.2076	5.27143	-0.946048	FGFR2	fibroblast growth factor receptor 2 isoform 8 precursor	0.519053
axo08365-r_at	2e-05	2.89e-06	-12.0396	4.51089	-0.945492	PDPK1	3-phosphoinositide dependent protein kinase-1 isoform 1	0.519252
axo01935-f_at	3.67e-06	3.19e-07	-16.1945	6.96034	-0.943458	TGIF1	TG-interacting factor isoform a	0.519985
axo06743-f_at	1.29e-05	1.65e-06	-12.9886	5.13374	-0.941942	FAM185A	hypothetical protein LOC222234 isoform 1	0.520532
axo20609-f_s_at	1.15e-06	6.47e-08	-20.0142	8.7242	-0.941657	RBMX	RNA binding motif protein, X-linked	0.520635
axo01214-f_at	4.76e-05	8.39e-06	-10.4015	3.32222	-0.941512	SDR42E1	short chain dehydrogenase/reductase family 42E, member 1	0.520687
axo16617-f_at	4.52e-06	4.18e-07	-15.6218	6.66105	-0.941357	PTPLAD2	protein tyrosine phosphatase-like A domain containing 2	0.520743
axo08531-f_s_at	1.27e-06	7.47e-08	-19.637	8.56566	-0.941075	PSMC5	proteasome 26S ATPase subunit 5	0.520845
axo01255-r_at	8.85e-05	1.8e-05	-9.35779	2.47533	-0.9395	C1orf96	hypothetical protein LOC126731	0.521413
axo01726-f_at	5.07e-05	9.05e-06	-10.2939	3.23841	-0.939007	C17orf103	transcript expressed during hematopoiesis 2	0.521592
axo08814-r_at	2.86e-06	2.28e-07	-16.9329	7.33133	-0.938959	SMARCE1	SWI/SNF-related matrix-associated actin-dependent regulator of chromatin e1	0.521609
axo13113-f_at	8.69e-05	1.76e-05	-9.38758	2.5006	-0.938577	SHANK2	SH3 and multiple ankyrin repeat domains 2 isoform 1	0.521747
axo15433-r_at	0.00393	0.00157	-4.77106	-2.46648	-0.938261	FBN1	fibrillin 1 precursor	0.521862
axo12437-f_at	2.9e-05	4.56e-06	-11.313	4.00283	-0.937851	STARD3	StAR-related lipid transfer (START) domain containing 3	0.52201
axo11635-f_at	2.36e-06	1.77e-07	-17.5135	7.61204	-0.937338	H1FX	H1 histone family, member X	0.522196
axo20630-f_s_at	0.000887	0.000277	-6.2887	-0.5621	-0.937266	NASP	nuclear autoantigenic sperm protein isoform 2	0.522222
axo15755-f_s_at	0.0022	0.000799	-5.32836	-1.7306	-0.936521	DSP	desmoplakin isoform II	0.522491
axo05050-f_at	7.62e-05	1.5e-05	-9.60015	2.67899	-0.936324	RB1	retinoblastoma 1	0.522563
axo06808-f_at	4.57e-06	4.24e-07	-15.5917	6.64504	-0.935875	LDLR	low density lipoprotein receptor precursor	0.522725
axo08914-f_at	0.000481	0.000135	-7.00642	0.23543	-0.935179	SUV39H1	suppressor of variegation 3-9 homolog 1	0.522978
axo16239-r_at	5.26e-05	9.49e-06	-10.2262	3.18528	-0.934593	NCAPG2	leucine zipper protein 5	0.52319
axo10152-r_at	2.13e-06	1.55e-07	-17.8303	7.76141	-0.934574	HUS1	HUS1 checkpoint protein	0.523197
axo19652-f_at	1.57e-06	1.01e-07	-18.8662	8.23194	-0.934146	SYT16	synaptotagmin XIV-like	0.523352
axo10895-r_at	1.27e-05	1.61e-06	-13.0374	5.16458	-0.934132	ELK3	ELK3 protein	0.523357
axo16549-f_at	0.000708	0.000213	-6.54315	-0.27234	-0.9337	RBM28	RNA binding motif protein 28	0.523514
axo01158-f_at	0.000551	0.000159	-6.83765	0.05333	-0.933509		RAN binding protein 3-like	0.523583
axo12335-f_at	1.48e-06	9.24e-08	-19.0912	8.33075	-0.933311	GADD45G	growth arrest and DNA-damage-inducible, gamma	0.523655
axo08544-r_at	2.85e-06	2.26e-07	-16.9563	7.34283	-0.931812	PSMD10	proteasome 26S non-ATPase subunit 10 isoform 1	0.524199
axo11194-r_at	0.0021	0.00076	-5.37207	-1.67473	-0.931796	LGALS3BP	galectin 3 binding protein	0.524205
axo16723-f_at	1.49e-06	9.32e-08	-19.0693	8.3212	-0.931678	NUP133	nucleoporin 133kDa	0.524248
axo09991-f_at	0.00144	0.000488	-5.76293	-1.18669	-0.93165	CDH1	cadherin 1, type 1 preproprotein	0.524258
axo07478-f_at	3.6e-06	3.11e-07	-16.2474	6.98744	-0.931415	ARF5	ADP-ribosylation factor 5	0.524344
axo00384-f_at	4.11e-06	3.71e-07	-15.8688	6.79141	-0.931162	APEX1	APEX nuclease 1	0.524436
axo19195-f_at	2.06e-06	1.46e-07	-17.9609	7.82217	-0.930925	UXS1	UDP-glucuronate decarboxylase 1	0.524522
axo04848-f_at	5.69e-05	1.05e-05	-10.0884	3.07623	-0.930453	C1orf116	specifically androgen-regulated protein isoform 2	0.524693
axo11987-f_at	0.000222	5.37e-05	-8.0106	1.25568	-0.929768	SLC30A9	solute carrier family 30 (zinc transporter), member 9	0.524943
axo15512-f_at	2.19e-05	3.23e-06	-11.8586	4.38702	-0.928107	GINS2	DNA replication complex GINS protein PSF2	0.525547
axo00526-f_at	2.5e-06	1.89e-07	-17.3577	7.53761	-0.927283	MYOF	myoferlin isoform b	0.525848
axo20884-f_s_at	2.17e-06	1.59e-07	-17.7661	7.73131	-0.926482	MFAP1	microfibrillar-associated protein 1	0.52614
axo05759-f_at	1.94e-05	2.79e-06	-12.0983	4.55075	-0.926197	CTSK	cathepsin K preproprotein	0.526244
axo10257-r_at	2.07e-06	1.49e-07	-17.9227	7.80444	-0.925905	SNRPA	small nuclear ribonucleoprotein polypeptide A	0.52635
axo13895-f_at	0.0459	0.0264	-2.7403	-5.48352	-0.925705	CYFIP1	cytoplasmic FMR1 interacting protein 1 isoform a	0.526423
axo12547-f_at	1.05e-05	1.26e-06	-13.4641	5.43006	-0.925677	RAC1	ras-related C3 botulinum toxin substrate 1 isoform Rac1	0.526433
axo00034-f_at	9.4e-05	1.92e-05	-9.26897	2.39957	-0.923997	TNKS1BP1	tankyrase 1-binding protein 1	0.527047
axo13224-f_at	0.000112	2.39e-05	-8.9918	2.15916	-0.923798	SSBP2	single-stranded DNA binding protein 2	0.527119
axo10898-f_at	3.58e-06	3.09e-07	-16.2631	6.99547	-0.923477	EPHA1	ephrin receptor EphA1	0.527237
axo15811-f_at	3.4e-06	2.88e-07	-16.4149	7.07275	-0.922877	C14orf129	chromosome 14 open reading frame 129	0.527456
axo08491-f_at	3.07e-06	2.51e-07	-16.7209	7.22645	-0.922387	MAPK13	mitogen-activated protein kinase 13	0.527635
axo08501-f_at	1.15e-06	6.5e-08	-19.9993	8.71799	-0.922021	HTRA1	HtrA serine peptidase 1 precursor	0.527769
axo06337-f_at	0.000147	3.3e-05	-8.58652	1.79625	-0.921726	ALOX12B	arachidonate 12-lipoxygenase, 12R type	0.527877
axo11224-r_at	0.0765	0.0476	-2.35373	-6.08609	-0.921309	ATP8B1	ATPase, class I, type 8B, member 1	0.52803
axo03467-f_s_at	8.12e-06	8.97e-07	-14.1011	5.81193	-0.921016	QKI	quaking homolog, KH domain RNA binding isoform HQK-7B	0.528137
axo13633-f_s_at	1.32e-06	7.89e-08	-19.4963	8.50574	-0.920496	GCAT	glycine C-acetyltransferase precursor	0.528327
axo12181-f_at	3.49e-06	2.99e-07	-16.3326	7.03094	-0.920262	CLCA2	chloride channel accessory 2 precursor	0.528413
axo17227-f_at	3.74e-05	6.24e-06	-10.8359	3.65292	-0.919748	ING3	inhibitor of growth family, member 3 isoform 1	0.528601
axo02525-f_at	0.0142	0.00689	-3.65484	-4.0699	-0.919716	PPP2R5C	gamma isoform of regulatory subunit B56, protein phosphatase 2A isoform d	0.528613
axo12673-f_at	1.21e-05	1.51e-06	-13.1412	5.22994	-0.919064	FICD	Huntingtin interacting protein E	0.528852
axo13745-f_at	2.5e-06	1.9e-07	-17.3547	7.53617	-0.919041	DAPP1	dual adaptor of phosphotyrosine and 3-phosphoinositides	0.52886
axo19898-r_at	2.02e-05	2.93e-06	-12.0183	4.49645	-0.918945	THOC3	THO complex 3	0.528896
axo00910-f_at	2.99e-06	2.42e-07	-16.7994	7.26544	-0.918939	SLC10A7	solute carrier family 10 (sodium/bile acid cotransporter family), member 7 isoform b	0.528898
axo12473-f_at	0.000289	7.39e-05	-7.65092	0.90216	-0.9185	CLP1	ATP/GTP-binding protein isoform 1	0.529059
axo01010-r_at	8.91e-06	1.02e-06	-13.8665	5.67324	-0.918185	CCDC43	coiled-coil domain containing 43 isoform 1	0.529174
axo19812-f_at	7.17e-06	7.61e-07	-14.4163	5.99492	-0.917907	SLITRK6	slit and trk like 6	0.529276
axo06772-f_at	3.65e-06	3.18e-07	-16.2045	6.96544	-0.917589	PTPN3	protein tyrosine phosphatase, non-receptor type 3 isoform 2	0.529393
axo00159-f_at	0.000127	2.77e-05	-8.80274	1.99158	-0.916509	LARP4	c-Mpl binding protein isoform a	0.529789
axo18289-f_at	3.76e-05	6.28e-06	-10.8263	3.64573	-0.916148	SLC17A9	vesicular nucleotide transporter SLC17A9	0.529922
axo11585-f_at	5.63e-05	1.03e-05	-10.1076	3.0915	-0.915973	NAP1L4	nucleosome assembly protein 1-like 4	0.529986
axo12781-r_at	3.02e-06	2.45e-07	-16.7716	7.25166	-0.915706	DUSP10	dual specificity phosphatase 10 isoform a	0.530084
axo04429-f_at	0.000164	3.75e-05	-8.43496	1.6569	-0.915439	RCC1	regulator of chromosome condensation 1 isoform b	0.530182
axo03824-r_at	1.49e-05	1.99e-06	-12.6606	4.92337	-0.915405	CREBZF	HCF-binding transcription factor Zhangfei	0.530195
axo11214-f_at	8.12e-06	8.98e-07	-14.1001	5.81138	-0.915041	MRE11A	meiotic recombination 11 homolog A isoform 1	0.530329
axo18423-f_at	8.84e-06	1.01e-06	-13.8824	5.6827	-0.914895	TMEM168	transmembrane protein 168	0.530382
axo12725-r_at	3.78e-06	3.32e-07	-16.1106	6.9171	-0.91452	RNF112	ring finger protein 112	0.53052
axo12458-f_at	1.65e-06	1.08e-07	-18.705	8.16044	-0.914519	IFI44L	interferon-induced protein 44-like	0.530521
axo17550-f_at	6.61e-05	1.26e-05	-9.83433	2.87162	-0.913877	DDX24	DEAD (Asp-Glu-Ala-Asp) box polypeptide 24	0.530757
axo16346-f_at	2.03e-06	1.44e-07	-18.006	7.8431	-0.913675	CPSF3L	cleavage and polyadenylation specific factor 3-like	0.530831
axo03170-f_at	9.81e-06	1.15e-06	-13.6329	5.5329	-0.913612	PRICKLE2	prickle-like 2	0.530854
axo16573-f_at	1.6e-05	2.18e-06	-12.5089	4.82439	-0.913123	HAUS2	centrosomal protein 27kDa isoform 1	0.531034
axo13418-f_at	0.0072	0.00316	-4.22582	-3.22882	-0.912695	MYOF	myoferlin isoform a	0.531192
axo18041-r_at	6.11e-05	1.14e-05	-9.97101	2.98224	-0.912399	CCNO	cyclin domain containing	0.531301
axo10341-f_at	2e-06	1.41e-07	-18.0522	7.86445	-0.911994	NMI	N-myc and STAT interactor	0.53145
axo13158-f_at	1.39e-05	1.82e-06	-12.8199	5.02619	-0.911646	GTPBP4	G protein-binding protein CRFG	0.531578
axo20834-f_at	1.1e-05	1.34e-06	-13.3653	5.36929	-0.910411	H3F3B	H3 histone, family 3B	0.532034
axo11450-r_at	2.38e-05	3.57e-06	-11.6983	4.27581	-0.910303	GALK2	galactokinase 2 isoform 2	0.532073
axo05643-f_at	1.91e-06	1.32e-07	-18.2094	7.93668	-0.909118	SPG21	spastic paraplegia 21 isoform a	0.53251
axo02232-f_at	8.82e-06	1e-06	-13.8928	5.6889	-0.908195	HARBI1	harbinger transposase derived 1	0.532851
axo18736-f_at	0.000377	0.000102	-7.30122	0.54591	-0.907713	MMP28	matrix metalloproteinase 28 isoform 1 preproprotein	0.53303
axo05430-f_at	2.85e-06	2.27e-07	-16.95	7.33974	-0.907429	ADFP	adipose differentiation-related protein	0.533134
axo13677-f_at	9.09e-05	1.85e-05	-9.31987	2.44306	-0.907354	IL17RA	interleukin 17A receptor precursor	0.533162
axo19860-f_at	9.07e-06	1.04e-06	-13.8187	5.64469	-0.907223	POLDIP3	DNA polymerase delta interacting protein 3 isoform 1	0.53321
axo15493-r_at	3.16e-05	5.06e-06	-11.1523	3.88649	-0.905923	GOLT1B	golgi transport 1 homolog B	0.533691
axo03971-r_at	4.45e-06	4.09e-07	-15.6661	6.68459	-0.90539	LOC100128274	PREDICTED: hypothetical protein	0.533888
axo18189-f_at	1.95e-06	1.36e-07	-18.1329	7.90159	-0.90446	CDC25B	cell division cycle 25B isoform 1	0.534233
axo01418-f_at	4.4e-06	4.04e-07	-15.6902	6.69735	-0.904189	ARRDC1	arrestin domain containing 1	0.534333
axo18638-f_at	0.000134	2.95e-05	-8.72484	1.92167	-0.904064	SPATS2	spermatogenesis associated, serine-rich 2	0.534379
axo19866-f_at	1.49e-05	1.99e-06	-12.6626	4.92465	-0.903981	SLC25A33	mitochondrial carrier protein MGC4399	0.53441
axo00779-f_at	1.33e-05	1.71e-06	-12.9234	5.09228	-0.90386	MDP1	magnesium-dependent phosphatase 1	0.534455
axo20675-f_at	0.000168	3.87e-05	-8.39556	1.62034	-0.903136	SNAI2	snail 2	0.534723
axo11091-r_at	2.2e-06	1.61e-07	-17.73	7.7144	-0.90288	RQCD1	RCD1 required for cell differentiation1 homolog	0.534818
axo04102-f_at	9.02e-06	1.03e-06	-13.8351	5.65451	-0.902533		PREDICTED: hypothetical protein	0.534947
axo14096-r_at	0.000161	3.67e-05	-8.46047	1.68049	-0.901885	TSC22D2	TSC22 domain family, member 2	0.535187
axo17080-f_at	1.5e-06	9.41e-08	-19.0464	8.31119	-0.901808	NAT12	N-acetyltransferase 12	0.535215
axo06778-f_at	0.000114	2.42e-05	-8.97317	2.14277	-0.900797	TSEN2	tRNA-intron nuclease 2 isoform 3	0.535591
axo09180-f_at	0.000333	8.78e-05	-7.46061	0.70987	-0.900447	USP7	ubiquitin specific peptidase 7	0.535721
axo19397-f_at	0.000983	0.000313	-6.17147	-0.6983	-0.89957	NSBP1	nucleosomal binding protein 1	0.536046
axo07713-f_at	5.74e-06	5.74e-07	-14.9719	6.30834	-0.899244	DCI	dodecenoyl-Coenzyme A delta isomerase precursor	0.536168
axo17035-r_at	5.26e-05	9.48e-06	-10.2281	3.18676	-0.899179	ELAC1	elaC homolog 1	0.536192
axo03091-f_at	5.07e-05	9.06e-06	-10.293	3.2377	-0.898934	PHF20L1	PHD finger protein 20-like 1 isoform 3	0.536283
axo12879-f_at	2.38e-06	1.79e-07	-17.492	7.60181	-0.898792	OGFR	opioid growth factor receptor	0.536336
axo18691-r_at	0.000162	3.7e-05	-8.44871	1.66962	-0.897835	OBFC2B	oligonucleotide/oligosaccharide-binding fold containing 2B	0.536692
axo20322-f_at	5.61e-06	5.57e-07	-15.0327	6.34191	-0.897633	C5orf30	hypothetical protein LOC90355	0.536767
axo13625-f_at	2.05e-06	1.46e-07	-17.9748	7.82863	-0.897101	HABP4	hyaluronan binding protein 4	0.536965
axo18589-f_at	1.16e-05	1.44e-06	-13.2334	5.28755	-0.896973	PAPOLG	poly(A) polymerase gamma	0.537012
axo01423-r_at	2.46e-06	1.86e-07	-17.3947	7.55538	-0.89674	TARS	threonyl-tRNA synthetase	0.537099
axo00160-f_at	3.88e-05	6.54e-06	-10.7661	3.60061	-0.896733	LARP4	c-Mpl binding protein isoform a	0.537102
axo03667-r_at	2.06e-06	1.48e-07	-17.9404	7.81266	-0.896304	LOC653506	PREDICTED: similar to METRNL protein	0.537261
axo01779-r_at	2.65e-05	4.07e-06	-11.4885	4.12823	-0.894584	TMEM92	transmembrane protein 92	0.537902
axo14380-f_at	9.85e-06	1.16e-06	-13.6229	5.52684	-0.893781	TMCC1	transmembrane and coiled-coil domain family 1 isoform b	0.538202
axo08549-f_at	1.55e-06	9.84e-08	-18.9337	8.2617	-0.893753	PTBP1	polypyrimidine tract-binding protein 1 isoform a	0.538212
axo03212-f_at	9.1e-05	1.85e-05	-9.3171	2.4407	-0.893458	ARHGEF1	Rho guanine nucleotide exchange factor 1 isoform 1	0.538322
axo18824-f_at	6.61e-06	6.84e-07	-14.6256	6.11428	-0.893368	RNASEH2B	ribonuclease H2, subunit B isoform 1	0.538356
axo03113-f_at	1.19e-05	1.49e-06	-13.1719	5.24915	-0.893205	FAM89A	family with sequence similarity 89, member A	0.538417
axo08470-f_at	2.59e-05	3.96e-06	-11.5313	4.15849	-0.89293	PRKAG1	AMP-activated protein kinase, noncatalytic gamma-1 subunit isoform 1	0.538519
axo07247-r_at	3.46e-06	2.96e-07	-16.3556	7.04267	-0.892655	EMP2	epithelial membrane protein 2	0.538622
axo08640-r_at	5.35e-06	5.21e-07	-15.1671	6.41577	-0.892105	RANBP1	RAN binding protein 1	0.538828
axo02492-f_at	3.75e-06	3.28e-07	-16.1366	6.93052	-0.890623	CCRL1	chemokine (C-C motif) receptor-like 1	0.539381
axo18905-r_at	1.29e-05	1.65e-06	-12.9893	5.13415	-0.89041	MAK10	corneal wound healing-related protein	0.539461
axo10646-f_at	1.35e-05	1.75e-06	-12.8833	5.06676	-0.890218	LIMS1	LIM and senescent cell antigen-like domains 1	0.539533
axo16321-r_at	0.000232	5.65e-05	-7.95233	1.19927	-0.889223	TRNAU1AP	tRNA selenocysteine associated protein 1	0.539905
axo04944-f_at	0.000142	3.16e-05	-8.64136	1.84617	-0.889185	DDX17	DEAD box polypeptide 17 isoform 3	0.539919
axo20972-f_at	0.000786	0.00024	-6.42538	-0.40547	-0.888858	DDX19B	DEAD (Asp-Glu-Ala-As) box polypeptide 19 isoform 1	0.540041
axo13352-r_at	1.38e-06	8.34e-08	-19.3508	8.44331	-0.88809	SNX10	sorting nexin 10	0.540329
axo01319-f_at	3.6e-05	5.95e-06	-10.9067	3.70569	-0.887454	EDARADD	EDAR-associated death domain isoform A	0.540567
axo02638-r_at	1.78e-06	1.19e-07	-18.4618	8.05137	-0.886984		component of oligomeric golgi complex 5 isoform 2	0.540743
axo18026-f_at	0.000609	0.000178	-6.72122	-0.07421	-0.886854	RNASEL	ribonuclease L	0.540792
axo07614-f_at	2.45e-05	3.69e-06	-11.6441	4.2379	-0.886529	CENPE	centromere protein E	0.540914
axo05386-f_at	4.82e-05	8.52e-06	-10.3808	3.30615	-0.885914	CHEK1	checkpoint kinase 1	0.541145
axo05520-f_at	6.71e-05	1.28e-05	-9.80939	2.85129	-0.885382	CSK	c-src tyrosine kinase	0.541344
axo16407-f_at	1.29e-05	1.65e-06	-12.9873	5.13287	-0.884753	PRPF39	PRP39 pre-mRNA processing factor 39 homolog	0.54158
axo17413-r_at	2.06e-06	1.47e-07	-17.9505	7.81737	-0.884502	C5orf15	keratinocytes associated transmembrane protein 2	0.541674
axo09827-f_at	0.00054	0.000155	-6.8636	0.08153	-0.884458	TANK	TRAF interacting protein TANK isoform a	0.541691
axo14101-f_at	8.04e-05	1.6e-05	-9.51068	2.60432	-0.884191	ARHGAP11A	Rho GTPase activating protein 11A isoform 1	0.541791
axo21139-f_at	3.03e-06	2.47e-07	-16.7556	7.24371	-0.883946	LOC729085	hypothetical protein LOC729085	0.541883
axo07415-f_at	0.000768	0.000234	-6.45076	-0.37663	-0.883915	PARP1	poly (ADP-ribose) polymerase family, member 1	0.541895
axo15174-f_at	2.41e-05	3.62e-06	-11.6762	4.2604	-0.883182	PRPF31	pre-mRNA processing factor 31 homolog	0.54217
axo05007-r_at	0.000168	3.85e-05	-8.40041	1.62485	-0.882412	2018-09-08	septin 8 isoform a	0.54246
axo11690-f_at	1.47e-06	9.09e-08	-19.1322	8.34864	-0.882013	TUBA1B	tubulin, alpha, ubiquitous	0.54261
axo08487-r_at	8.63e-06	9.76e-07	-13.943	5.71867	-0.88115	MAPK6	mitogen-activated protein kinase 6	0.542934
axo12394-f_at	3.59e-06	3.11e-07	-16.2499	6.98874	-0.880759	IFRD2	interferon-related developmental regulator 2	0.543081
axo13442-r_at	9.29e-05	1.9e-05	-9.28628	2.41439	-0.880732	SACM1L	suppressor of actin 1	0.543092
axo19361-f_at	1.95e-05	2.8e-06	-12.0932	4.54728	-0.880688	C17orf28	hypothetical protein LOC283987	0.543108
axo12124-f_at	0.000615	0.00018	-6.71114	-0.08533	-0.879806	TRIM16	tripartite motif-containing 16	0.54344
axo11295-f_at	7.91e-06	8.66e-07	-14.1674	5.85075	-0.879522	DNM1L	dynamin 1-like isoform 3	0.543548
axo16391-f_at	2.46e-06	1.86e-07	-17.3996	7.55772	-0.879457	HERC6	hect domain and RLD 6	0.543572
axo16240-f_at	5.21e-05	9.38e-06	-10.2431	3.19854	-0.879296	NCAPG2	leucine zipper protein 5	0.543633
axo03153-f_at	5.72e-06	5.72e-07	-14.9801	6.31283	-0.879254	MAP4K5	mitogen-activated protein kinase kinase kinase kinase 5	0.543648
axo04994-f_s_at	1.54e-05	2.07e-06	-12.5945	4.88039	-0.878918	GTF2H2B	general transcription factor IIH, polypeptide 2B	0.543775
axo17671-r_at	9.78e-06	1.15e-06	-13.6396	5.53694	-0.877941	MTA3	metastasis associated 1 family, member 3	0.544144
axo14337-r_at	4.01e-05	6.81e-06	-10.7067	3.55579	-0.877588	KLHDC10	kelch domain containing 10	0.544276
axo13548-r_at	5.89e-06	5.93e-07	-14.9079	6.27281	-0.875496	TMEM208	HSPC171 protein	0.545066
axo20136-f_at	6.47e-05	1.22e-05	-9.87437	2.90416	-0.874842	SLC35B4	solute carrier family 35, member B4	0.545313
axo01585-f_at	4.49e-06	4.14e-07	-15.641	6.67125	-0.874408	MFSD6L	major facilitator superfamily domain containing 6-like	0.545478
axo07482-r_at	6.46e-06	6.65e-07	-14.6797	6.14487	-0.873862	RHOA	ras homolog gene family, member A	0.545684
axo12282-r_at	1.44e-05	1.89e-06	-12.7487	4.98034	-0.873051	CYSLTR1	cysteinyl leukotriene receptor 1	0.545991
axo07522-f_at	2.81e-05	4.37e-06	-11.3798	4.05078	-0.870413	BCL7B	B-cell CLL/lymphoma 7B	0.54699
axo10470-r_at	1.2e-05	1.5e-06	-13.1551	5.23862	-0.87037	SNRNP40	WD repeat domain 57 (U5 snRNP specific)	0.547007
axo02022-f_at	0.000134	2.97e-05	-8.71895	1.91636	-0.870092	ELF1	E74-like factor 1 (ets domain transcription factor) isoform a	0.547112
axo08428-f_at	5.31e-05	9.59e-06	-10.2124	3.17444	-0.870011	2018-09-05	septin 5	0.547143
axo20278-f_at	0.00144	0.000487	-5.76355	-1.18593	-0.869171	FAM40A	hypothetical protein LOC85369	0.547461
axo11461-f_at	5.65e-06	5.63e-07	-15.0123	6.33064	-0.868739	PRSS16	protease, serine, 16	0.547625
axo20981-f_s_at	2.97e-06	2.4e-07	-16.8201	7.27569	-0.868114	NONO	non-POU domain containing, octamer-binding isoform 1	0.547863
axo20976-f_at	3.74e-06	3.27e-07	-16.1418	6.93322	-0.867703	CBX3	chromobox homolog 3	0.548019
axo06485-r_at	0.0013	0.000435	-5.86553	-1.06199	-0.867381	ATRX	transcriptional regulator ATRX isoform 1	0.548141
axo06466-f_at	1.67e-05	2.31e-06	-12.4095	4.75886	-0.866664	CLP1	ATP/GTP-binding protein isoform 2	0.548413
axo15168-f_at	8.31e-06	9.25e-07	-14.0434	5.77805	-0.866313	WSB1	WD repeat and SOCS box-containing 1 isoform 1	0.548547
axo12153-f_at	0.000396	0.000108	-7.24286	0.48519	-0.865385	RELB	reticuloendotheliosis viral oncogene homolog B	0.5489
axo11749-r_at	3.36e-06	2.84e-07	-16.4462	7.08861	-0.865102	PIM3	pim-3 oncogene	0.549007
axo14948-f_at	2.89e-05	4.52e-06	-11.3244	4.01105	-0.86487	SUZ12	joined to JAZF1	0.549096
axo09479-r_at	0.000199	4.72e-05	-8.16004	1.39887	-0.864781	STX11	syntaxin 11	0.54913
axo15631-f_at	1.88e-06	1.29e-07	-18.2695	7.96415	-0.8644	PADI3	peptidylarginine deiminase type III	0.549275
axo03621-f_at	1.27e-05	1.62e-06	-13.0241	5.15622	-0.864057	WARS	tryptophanyl-tRNA synthetase isoform b	0.549405
axo07325-f_at	2.87e-06	2.29e-07	-16.9288	7.32928	-0.862759	GCLC	glutamate-cysteine ligase, catalytic subunit	0.5499
axo11277-f_at	1.5e-06	9.44e-08	-19.0384	8.30768	-0.862732	PSCA	prostate stem cell antigen preproprotein	0.54991
axo06953-f_at	6.88e-06	7.19e-07	-14.526	6.05771	-0.862487	PLA2G4C	phospholipase A2, group IVC isoform 3	0.550004
axo19294-f_at	2.57e-06	1.98e-07	-17.2575	7.48941	-0.8622	TRIB1	G-protein-coupled receptor induced protein	0.550113
axo18934-f_at	4.11e-05	7.02e-06	-10.6618	3.52181	-0.861338	IPO4	importin 4	0.550442
axo19102-f_at	1.47e-05	1.96e-06	-12.688	4.94113	-0.860871	WDR76	WD repeat domain 76	0.55062
axo11013-f_at	0.000106	2.24e-05	-9.07277	2.23003	-0.860555	MYB	v-myb myeloblastosis viral oncogene homolog isoform 2	0.550741
axo05364-r_at	0.00111	0.000362	-6.03546	-0.85849	-0.860547	LIMA1	LIM domain and actin binding 1 isoform a	0.550744
axo10363-f_at	4.4e-05	7.63e-06	-10.5391	3.42829	-0.860475	CCNB2	cyclin B2	0.550771
axo11003-r_at	1.98e-06	1.39e-07	-18.0884	7.88112	-0.85957	JUND	jun D proto-oncogene	0.551117
axo17966-f_at	2.7e-06	2.1e-07	-17.1182	7.42193	-0.858889	ZNFX1	zinc finger, NFX1-type containing 1	0.551377
axo04555-r_at	7.62e-06	8.25e-07	-14.2607	5.90509	-0.858322	TNFAIP8	tumor necrosis factor, alpha-induced protein 8 isoform b	0.551594
axo11330-f_at	0.00161	0.000557	-5.64287	-1.3344	-0.857977	RAD50	RAD50 homolog isoform 1	0.551726
axo00772-r_at	0.000176	4.09e-05	-8.32906	1.55832	-0.85793	ZMYND19	zinc finger, MYND domain containing 19	0.551743
axo18590-r_at	5.07e-05	9.06e-06	-10.293	3.23772	-0.857621	C12orf43	hypothetical protein LOC64897	0.551862
axo14546-r_at	1.93e-05	2.75e-06	-12.1201	4.56547	-0.857351	MRPS27	mitochondrial ribosomal protein S27	0.551965
axo06321-f_at	1.67e-05	2.3e-06	-12.4201	4.76587	-0.856925	RCC2	regulator of chromosome condensation 2	0.552128
axo01219-r_at	7.94e-05	1.58e-05	-9.53089	2.62124	-0.856244	FAM84A	family with sequence similarity 84, member A	0.552389
axo01065-r_at	3.16e-06	2.61e-07	-16.6342	7.18319	-0.856158	SLFN13	schlafen family member 13	0.552422
axo18172-f_at	3.05e-05	4.85e-06	-11.2174	3.9338	-0.853939	ADAM28	ADAM metallopeptidase domain 28 isoform 3 preproprotein	0.553272
axo05328-f_at	0.00111	0.00036	-6.04015	-0.85293	-0.853596	BRD2	bromodomain containing 2	0.553404
axo19474-f_at	4.28e-05	7.37e-06	-10.5893	3.46662	-0.853313	UNC93B1	unc-93 homolog B1	0.553512
axo02555-f_at	9.06e-05	1.84e-05	-9.32395	2.44654	-0.853295	SERINC2	tumor differentially expressed 2-like	0.553519
axo08306-r_at	8.1e-06	8.93e-07	-14.1097	5.81699	-0.853009	OCLN	occludin	0.553629
axo06409-f_at	1.13e-05	1.39e-06	-13.2883	5.32168	-0.852572	CMKLR1	chemokine-like receptor 1 isoform a	0.553797
axo01362-f_at	0.00112	0.000365	-6.02904	-0.86612	-0.85201	SNX15	sorting nexin 15 isoform B	0.554012
axo03446-r_at	3.17e-05	5.09e-06	-11.1429	3.87961	-0.851388	DHDDS	dehydrodolichyl diphosphate synthase isoform b	0.554251
axo10424-f_at	0.000214	5.14e-05	-8.06282	1.30595	-0.851267	COPB2	coatomer protein complex, subunit beta 2 (beta prime)	0.554298
axo07575-r_at	5.94e-06	6.01e-07	-14.8813	6.25798	-0.851207	CCND2	cyclin D2	0.554321
axo15285-f_at	1.28e-05	1.62e-06	-13.0197	5.15342	-0.850809	ADAR	adenosine deaminase, RNA-specific isoform c	0.554474
axo20118-r_s_at	0.000118	2.54e-05	-8.91017	2.08716	-0.850808	ATAD1	ATPase family, AAA domain containing 1	0.554474
axo06448-f_at	1.28e-05	1.63e-06	-13.0132	5.14933	-0.850349	SLC35B3	solute carrier family 35, member B3	0.55465
axo08995-r_at	0.000832	0.000257	-6.35912	-0.48111	-0.85017	TLR3	toll-like receptor 3	0.55472
axo07832-r_at	6.05e-06	6.14e-07	-14.8372	6.23337	-0.84994	FRK	fyn-related kinase	0.554808
axo10221-f_at	0.000296	7.62e-05	-7.61679	0.86796	-0.849752	YBX1	nuclease sensitive element binding protein 1	0.55488
axo13222-f_at	0.00154	0.000528	-5.69104	-1.27491	-0.849037	SNAPIN	SNAP-associated protein	0.555155
axo13216-r_at	1.2e-05	1.5e-06	-13.1548	5.23843	-0.848709	SEMA3E	semaphorin 3E	0.555282
axo05747-f_at	0.00102	0.000327	-6.13057	-0.74622	-0.848491	CYP2C18	cytochrome P450 family 2 subfamily C polypeptide 18 isoform 2	0.555365
axo02097-r_at	3.71e-06	3.24e-07	-16.164	6.94464	-0.84842	GLUL	glutamine synthetase	0.555393
axo19047-f_at	3.14e-05	5.03e-06	-11.1608	3.89269	-0.848321	CARD16	caspase-1 dominant-negative inhibitor pseudo-ICE isoform 1	0.555431
axo10048-f_at	0.00723	0.00317	-4.22312	-3.23269	-0.846788	DSP	desmoplakin isoform I	0.556021
axo18978-f_at	5.37e-06	5.25e-07	-15.1524	6.40775	-0.84649	ZNF750	zinc finger protein 750	0.556136
axo15069-r_at	1.17e-05	1.45e-06	-13.2131	5.27486	-0.846488	KBTBD2	kelch repeat and BTB (POZ) domain containing 2	0.556137
axo19187-f_at	1.56e-05	2.12e-06	-12.5571	4.85591	-0.845755	ZNF703	zinc finger protein 703	0.55642
axo20785-f_at	2.16e-06	1.58e-07	-17.7805	7.73808	-0.845417	TRA2B	splicing factor, arginine/serine-rich 10	0.55655
axo09581-f_at	9.97e-05	2.07e-05	-9.17307	2.31708	-0.845134	HDAC3	histone deacetylase 3	0.556659
axo19314-f_at	1.86e-06	1.27e-07	-18.3108	7.98297	-0.843297	REEP4	receptor accessory protein 4	0.557368
axo02833-r_at	5.94e-06	6.01e-07	-14.8816	6.25814	-0.842532	DLGAP4	disks large-associated protein 4 isoform b	0.557664
axo19221-f_at	6.14e-05	1.15e-05	-9.96274	2.97558	-0.841344	C13orf18	hypothetical protein LOC80183	0.558124
axo08763-f_s_at	1.97e-06	1.38e-07	-18.0967	7.88494	-0.841247	SFRS3	splicing factor, arginine/serine-rich 3	0.558161
axo10448-r_at	0.000102	2.14e-05	-9.13115	2.2808	-0.840758	LHX2	LIM homeobox protein 2	0.55835
axo19760-f_at	3.28e-05	5.32e-06	-11.0766	3.83117	-0.840171	DSEL	dermatan sulfate epimerase-like	0.558578
axo02903-f_at	0.000155	3.51e-05	-8.5146	1.73037	-0.840094	ISCA2	iron-sulfur cluster assembly 2	0.558607
axo00383-f_at	0.00123	0.000408	-5.92442	-0.99104	-0.840088	COL12A1	collagen, type XII, alpha 1 short isoform precursor	0.558609
axo09299-f_at	5.21e-06	5.02e-07	-15.2438	6.45766	-0.83995	RAE1	RAE1 (RNA export 1, S.pombe) homolog	0.558663
axo02444-f_at	7.12e-05	1.38e-05	-9.71094	2.77062	-0.839692	TUBB	tubulin, beta	0.558763
axo18525-f_at	0.000216	5.22e-05	-8.0439	1.28777	-0.839479	ZNF574	zinc finger protein 574	0.558845
axo01883-r_at	4.79e-06	4.52e-07	-15.4576	6.57329	-0.838606	KDELC2	KDEL (Lys-Asp-Glu-Leu) containing 2	0.559184
axo10708-f_at	5.65e-06	5.62e-07	-15.0135	6.33133	-0.838454	POLRMT	mitochondrial DNA-directed RNA polymerase precursor	0.559243
axo02731-f_at	0.000357	9.53e-05	-7.37214	0.6192	-0.838433	BCL9L	B-cell CLL/lymphoma 9-like	0.559251
axo13349-f_at	0.000532	0.000152	-6.88058	0.09996	-0.838429	UBIAD1	UbiA prenyltransferase domain containing 1	0.559252
axo13055-f_at	0.00014	3.13e-05	-8.65357	1.85725	-0.838332	HBP1	HMG-box transcription factor 1	0.55929
axo11179-f_at	0.000538	0.000154	-6.86735	0.08561	-0.837558	LAD1	ladinin 1	0.55959
axo19788-r_at	2.21e-05	3.27e-06	-11.84	4.37418	-0.837404	PHF20L1	PHD finger protein 20-like 1 isoform 2	0.55965
axo02008-f_at	4.17e-05	7.18e-06	-10.6289	3.49685	-0.837112	WDR51B	WD repeat domain 51B	0.559763
axo17209-r_at	3.96e-06	3.53e-07	-15.9799	6.8494	-0.837063	MRPL50	mitochondrial ribosomal protein L50	0.559782
axo08778-f_at	0.000171	3.94e-05	-8.37358	1.59989	-0.835996	SLC2A5	solute carrier family 2 (facilitated glucose/fructose transporter), member 5 isoform 1	0.560196
axo10232-f_at	2.74e-05	4.23e-06	-11.4292	4.08604	-0.835864	PKNOX1	PBX/knotted 1 homeobox 1	0.560247
axo13244-f_at	0.000243	5.98e-05	-7.88839	1.13699	-0.835204	TNPO3	transportin 3	0.560504
axo06936-r_at	3.99e-06	3.58e-07	-15.9497	6.83369	-0.834993	ANXA7	annexin VII isoform 1	0.560586
axo12262-f_at	5.14e-06	4.92e-07	-15.2824	6.47864	-0.834808	CAPN9	calpain 9 isoform 1	0.560658
axo07946-f_at	4.62e-06	4.3e-07	-15.5626	6.6295	-0.834669	HSPE1	heat shock 10kDa protein 1	0.560712
axo10323-r_at	3.08e-06	2.52e-07	-16.7096	7.22084	-0.83439	VNN1	vanin 1 precursor	0.56082
axo06544-f_at	1.03e-05	1.22e-06	-13.5238	5.46654	-0.833967	SLC25A39	solute carrier family 25, member 39 isoform a	0.560985
axo19888-f_at	1.45e-05	1.92e-06	-12.728	4.96699	-0.833788	MXRA8	matrix-remodelling associated 8	0.561054
axo04229-f_at	0.00019	4.49e-05	-8.21991	1.45565	-0.833261	PAPD5	PAP associated domain containing 5 isoform a	0.561259
axo16054-f_at	9.55e-05	1.96e-05	-9.24294	2.37725	-0.833172	KLHDC4	kelch domain containing 4	0.561294
axo19483-f_at	3e-06	2.43e-07	-16.7902	7.26089	-0.831293	TMEM49	transmembrane protein 49	0.562025
axo19910-f_at	0.000895	0.00028	-6.2776	-0.57493	-0.830942	COG8	component of oligomeric golgi complex 8	0.562162
axo15812-f_at	5.49e-06	5.41e-07	-15.0908	6.37391	-0.830207	C3orf19	hypothetical protein LOC51244	0.562449
axo18611-f_at	0.000731	0.000221	-6.50707	-0.31295	-0.829419	TMEM135	transmembrane protein 135	0.562756
axo11000-f_at	0.000517	0.000147	-6.9174	0.13978	-0.829062	HSPA5	heat shock 70kDa protein 5	0.562895
axo14164-f_at	4.76e-05	8.39e-06	-10.4022	3.32275	-0.828671	NUAK1	AMPK-related protein kinase 5	0.563048
axo15684-r_at	3.8e-05	6.38e-06	-10.8033	3.6285	-0.828637	DCXR	dicarbonyl/L-xylulose reductase	0.563061
axo13351-f_at	7.67e-06	8.32e-07	-14.245	5.89596	-0.827291	SNX8	sorting nexin 8	0.563587
axo02895-f_at	0.0233	0.0122	-3.25997	-4.6732	-0.827106	OTOF	otoferlin isoform a	0.563659
axo12749-f_at	5.91e-06	5.96e-07	-14.8968	6.26662	-0.826836	MAD2L1BP	MAD2L1 binding protein isoform 1	0.563764
axo07380-f_at	8.74e-05	1.77e-05	-9.37802	2.4925	-0.826332	IL13RA1	interleukin 13 receptor, alpha 1 precursor	0.563961
axo18487-r_at	6.12e-06	6.22e-07	-14.8126	6.21958	-0.825512	ELOVL4	elongation of very long chain fatty acids-like 4	0.564282
axo10147-f_at	0.00418	0.00168	-4.71462	-2.54345	-0.824685	PRLR	prolactin receptor	0.564605
axo17775-f_at	1.16e-05	1.44e-06	-13.2342	5.28805	-0.82378	TMEM181	G protein-coupled receptor 178	0.56496
axo01376-f_at	3.23e-05	5.22e-06	-11.1043	3.85142	-0.82377	CCDC90A	coiled-coil domain containing 90A	0.564964
axo18030-r_at	0.000121	2.61e-05	-8.87835	2.05895	-0.823465	TNFAIP1	tumor necrosis factor, alpha-induced protein 1	0.565083
axo05764-f_at	2.58e-06	1.99e-07	-17.2486	7.4851	-0.823316	SYTL4	synaptotagmin-like 4	0.565141
axo14878-f_at	5.44e-06	5.34e-07	-15.1187	6.38927	-0.822458	IFRD1	interferon-related developmental regulator 1	0.565478
axo11685-f_at	3.61e-05	5.98e-06	-10.8986	3.69966	-0.822226	CITED2	Cbp/p300-interacting transactivator, with Glu/Asp-rich carboxy-terminal domain, 2	0.565569
axo04733-f_at	0.000153	3.47e-05	-8.52724	1.74199	-0.82203	TMEM223	transmembrane protein 223	0.565646
axo15463-r_at	3.28e-06	2.75e-07	-16.5168	7.12425	-0.821509	DERL2	Der1-like domain family, member 2	0.56585
axo17583-r_at	0.000349	9.29e-05	-7.39918	0.64699	-0.821403	SNX14	sorting nexin 14 isoform b	0.565891
axo04912-f_at	0.000124	2.69e-05	-8.84193	2.02657	-0.821149	GPR89A	G protein-coupled receptor 89A isoform 1	0.565991
axo12746-f_at	0.000126	2.75e-05	-8.81273	2.00051	-0.821056	TESK2	testis-specific protein kinase 2	0.566027
axo07722-f_at	2.15e-06	1.56e-07	-17.8097	7.75174	-0.820465	DES	desmin	0.566259
axo01312-r_at	5.62e-05	1.03e-05	-10.1122	3.0951	-0.820246	TRAF5	TNF receptor-associated factor 5	0.566346
axo11716-r_at	5.35e-05	9.7e-06	-10.1954	3.161	-0.819957	NDC80	kinetochore associated 2	0.566459
axo00707-f_at	0.000904	0.000284	-6.26551	-0.58891	-0.819233	CCDC109A	coiled-coil domain containing 109A	0.566743
axo13825-r_at	2e-05	2.88e-06	-12.0453	4.51476	-0.818845	UBE2S	ubiquitin-conjugating enzyme E2S	0.566896
axo10181-r_at	4.04e-06	3.63e-07	-15.9175	6.81687	-0.818728	NARS	asparaginyl-tRNA synthetase	0.566942
axo20671-r_at	2.34e-06	1.74e-07	-17.5505	7.62964	-0.818587	SFRS2	splicing factor, arginine/serine-rich 2	0.566997
axo01311-f_at	0.000109	2.3e-05	-9.04043	2.20178	-0.81836	ARHGEF7	PAK-interacting exchange factor beta isoform b	0.567086
axo16581-f_at	0.000764	0.000233	-6.45624	-0.37042	-0.817786	MTPAP	PAP associated domain containing 1	0.567312
axo09070-f_at	2.21e-05	3.26e-06	-11.8423	4.37577	-0.817585	UBE2D2	ubiquitin-conjugating enzyme E2D 2 isoform 1	0.567391
axo15367-f_at	6.94e-06	7.29e-07	-14.5002	6.04297	-0.817516	PIGT	phosphatidylinositol glycan anchor biosynthesis, class T precursor	0.567418
axo14389-f_at	0.00521	0.00217	-4.51447	-2.82005	-0.816934	KDM4B	jumonji domain containing 2B	0.567647
axo08720-r_at	4.08e-05	6.95e-06	-10.6756	3.53231	-0.816578	SAFB	scaffold attachment factor B	0.567787
axo16745-f_at	0.00037	9.94e-05	-7.32688	0.57249	-0.816208	INTS9	integrator complex subunit 9 isoform 1	0.567933
axo02357-f_at	0.000593	0.000172	-6.75374	-0.03843	-0.81558	ANKRD43	ankyrin repeat domain 43	0.56818
axo05366-f_at	0.000194	4.61e-05	-8.18969	1.42703	-0.814995	ENTPD6	ectonucleoside triphosphate diphosphohydrolase 6 isoform 2	0.568411
axo17290-f_at	0.00013	2.85e-05	-8.76924	1.96158	-0.814716	IRGC	immunity-related GTPase family, cinema	0.56852
axo01973-r_at	6.31e-05	1.19e-05	-9.91479	2.9369	-0.814152	CBFA2T2	core-binding factor, runt domain, alpha subunit 2; translocated to, 2 isoform MTGR1c	0.568743
axo06739-f_at	0.00166	0.000576	-5.61367	-1.37061	-0.813838	IKBKG	inhibitor of kappa light polypeptide gene enhancer in B-cells, kinase gamma isoform c	0.568867
axo09801-f_at	0.012	0.00568	-3.7931	-3.86253	-0.813726	MYO9B	myosin IXB isoform 1	0.568911
axo04594-r_at	8.86e-05	1.8e-05	-9.35623	2.47401	-0.81367	KIAA1191	hypothetical protein LOC57179 isoform a	0.568933
axo12509-f_at	0.000753	0.000229	-6.47297	-0.35147	-0.813442	TLK2	tousled-like kinase 2 isoform A	0.569023
axo10345-f_at	0.0189	0.00951	-3.42858	-4.41377	-0.813288	LATS1	LATS homolog 1	0.569083
axo15468-f_at	8.12e-06	8.98e-07	-14.0989	5.81062	-0.812791	SLMO2	slowmo homolog 2	0.569279
axo07544-r_at	9.11e-06	1.05e-06	-13.8083	5.63849	-0.812526	KLF5	Kruppel-like factor 5	0.569384
axo20315-f_at	0.000262	6.54e-05	-7.78673	1.03715	-0.81232	SURF4	surfeit 4	0.569465
axo21172-f_at	0.00117	0.000385	-5.97883	-0.92589	-0.812098	NLE1	Notchless gene homolog isoform a	0.569553
axo20935-f_s_at	5.12e-06	4.9e-07	-15.2926	6.4842	-0.811915	KHDRBS1	KH domain containing, RNA binding, signal transduction associated 1	0.569625
axo09623-r_at	3.1e-06	2.55e-07	-16.6878	7.20996	-0.811738	CPNE3	copine III	0.569695
axo18427-f_at	2.02e-05	2.92e-06	-12.0223	4.49917	-0.810996	MTMR14	jumpy isoform 3	0.569988
axo15330-f_at	2.93e-05	4.61e-06	-11.2953	3.9901	-0.810958	PIAS4	protein inhibitor of activated STAT, 4	0.570003
axo16606-r_at	0.000279	7.08e-05	-7.6981	0.94927	-0.810544	TSR1	TSR1, 20S rRNA accumulation	0.570167
axo03627-r_at	0.000172	3.98e-05	-8.36277	1.58981	-0.810136	STAT3	signal transducer and activator of transcription 3 isoform 3	0.570328
axo19264-r_at	0.000292	7.47e-05	-7.63766	0.88889	-0.808677	CXorf21	hypothetical protein LOC80231	0.570905
axo18263-f_at	1.55e-05	2.09e-06	-12.5842	4.87361	-0.808661	MTBP	Mdm2, transformed 3T3 cell double minute 2, p53 binding protein binding protein	0.570912
axo21059-f_at	6.92e-06	7.26e-07	-14.5087	6.04785	-0.808289	KIAA0101	hypothetical protein LOC9768 isoform 1	0.571059
axo16193-r_at	1.63e-05	2.23e-06	-12.4703	4.79897	-0.807231	ANKRD49	fetal globin inducing factor	0.571478
axo07964-r_at	4.37e-06	4e-07	-15.7125	6.70914	-0.8072	IRF8	interferon regulatory factor 8	0.57149
axo18110-f_at	0.00172	0.0006	-5.57829	-1.41466	-0.807044	RBM25	RNA binding motif protein 25	0.571552
axo03196-f_at	3.63e-05	6.02e-06	-10.8901	3.69338	-0.806988	PTHLH	parathyroid hormone-like hormone isoform 1 preproprotein	0.571574
axo10234-f_at	8.55e-05	1.72e-05	-9.41176	2.52107	-0.806939	2018-09-04	septin 4 isoform 1	0.571593
axo05207-f_at	5.86e-06	5.9e-07	-14.9172	6.27796	-0.806806	NTF3	neurotrophin 3 isoform 1 preproprotein	0.571646
axo07337-r_at	0.00206	0.000741	-5.39308	-1.64796	-0.806597	GTF2B	general transcription factor IIB	0.571729
axo15540-f_at	3.52e-05	5.79e-06	-10.948	3.73637	-0.806577	IRAK4	interleukin-1 receptor-associated kinase 4 isoform a	0.571737
axo07608-f_at	0.00029	7.4e-05	-7.64827	0.89952	-0.805982	CDR2	cerebellar degeneration-related protein 2	0.571972
axo13292-f_at	0.00431	0.00174	-4.68461	-2.58457	-0.80575	TBK1	TANK-binding kinase 1	0.572064
axo17005-f_at	3.57e-05	5.9e-06	-10.9203	3.7158	-0.80537	BATF3	basic leucine zipper transcription factor, ATF-like 3	0.572215
axo13185-f_at	7.73e-05	1.52e-05	-9.57608	2.65895	-0.804657	PLXNB2	plexin B2	0.572498
axo02575-f_at	1.89e-05	2.69e-06	-12.1541	4.58838	-0.80421	LEMD2	LEM domain containing 2 isoform 1	0.572676
axo15546-f_at	3.97e-06	3.54e-07	-15.9706	6.84454	-0.804107	TMEM66	transmembrane protein 66	0.572716
axo01920-f_at	6.48e-06	6.68e-07	-14.6712	6.14009	-0.804014	ITGB1BP3	integrin beta 1 binding protein 3	0.572753
axo13092-f_at	0.000298	7.66e-05	-7.61062	0.86176	-0.803839	FBXW11	F-box and WD repeat domain containing 11 isoform C	0.572823
axo18863-f_at	1.5e-05	2.01e-06	-12.6473	4.91472	-0.803251	SFRS14	splicing factor, arginine/serine-rich 14	0.573057
axo02527-f_at	0.000161	3.68e-05	-8.45709	1.67737	-0.802786	SCNN1A	sodium channel, nonvoltage-gated 1 alpha isoform 1	0.573241
axo16086-f_at	0.00089	0.000278	-6.28451	-0.56693	-0.802048	ZCCHC8	zinc finger, CCHC domain containing 8	0.573535
axo00677-r_at	4.63e-06	4.31e-07	-15.559	6.6276	-0.801678	RRM1	ribonucleoside-diphosphate reductase M1 chain	0.573681
axo13786-f_s_at	0.000328	8.63e-05	-7.47918	0.7288	-0.801173	LSM3	Lsm3 protein	0.573882
axo08817-r_at	0.000142	3.16e-05	-8.6421	1.84684	-0.800949	SNAPC1	small nuclear RNA activating complex, polypeptide 1, 43kDa	0.573971
axo11279-f_at	5.01e-05	8.9e-06	-10.3176	3.25689	-0.800445	PSCA	prostate stem cell antigen preproprotein	0.574172
axo01208-r_at	9.71e-05	2e-05	-9.21629	2.35435	-0.79982	SFRS7	splicing factor, arginine/serine-rich 7	0.574421
axo05825-f_at	1.91e-05	2.72e-06	-12.136	4.57622	-0.799684	VWA5A	BCSC-1 isoform 1	0.574475
axo08351-f_at	2.68e-05	4.14e-06	-11.462	4.10937	-0.799192	PCOLCE	procollagen C-endopeptidase enhancer	0.574671
axo15604-f_at	3.1e-06	2.54e-07	-16.6957	7.21389	-0.79919	CPSF3	cleavage and polyadenylation specific factor 3, 73kDa	0.574672
axo14901-f_at	1.15e-05	1.43e-06	-13.2442	5.29425	-0.798008	KIAA0776	hypothetical protein LOC23376	0.575143
axo18844-f_at	4.42e-05	7.7e-06	-10.5261	3.41829	-0.797888	OSBPL9	oxysterol binding protein-like 9 isoform e	0.57519
axo13123-r_at	0.000475	0.000133	-7.02053	0.25051	-0.797748	LETM1	leucine zipper-EF-hand containing transmembrane protein 1	0.575246
axo16832-f_at	5.7e-05	1.05e-05	-10.087	3.07504	-0.797574	SLC29A3	solute carrier family 29 (nucleoside transporters), member 3	0.575316
axo20107-f_at	5e-06	4.76e-07	-15.3528	6.51677	-0.796381	AIFM2	apoptosis-inducing factor (AIF)-like mitchondrion-associated inducer of death	0.575792
axo14387-f_at	0.000889	0.000278	-6.28547	-0.56582	-0.796289	KDM1	amine oxidase (flavin containing) domain 2 isoform b	0.575828
axo13774-f_at	7.39e-06	7.92e-07	-14.3402	5.95109	-0.795972	ARHGEF16	Rho guanine exchange factor 16	0.575955
axo18784-f_at	0.000117	2.52e-05	-8.92341	2.09888	-0.795753	FYCO1	FYVE and coiled-coil domain containing 1	0.576042
axo19553-f_at	7.14e-06	7.57e-07	-14.4258	6.00037	-0.794752	EPPK1	epiplakin 1	0.576442
axo02530-r_at	1.12e-05	1.37e-06	-13.3233	5.34332	-0.794727	AGPAT6	lysophosphatidic acid acyltransferase zeta precursor	0.576452
axo13676-f_at	0.000206	4.93e-05	-8.10895	1.35016	-0.794666	PISD	phosphatidylserine decarboxylase	0.576477
axo01077-f_at	9.01e-06	1.03e-06	-13.8372	5.65575	-0.794013	C1orf58	Bro1-domain-containing protein	0.576737
axo05837-f_at	0.000251	6.2e-05	-7.84655	1.09602	-0.793488	MYO1B	myosin IB isoform 1	0.576948
axo01781-r_at	1.33e-05	1.71e-06	-12.9248	5.09323	-0.793307	GIMAP7	GTPase, IMAP family member 7	0.57702
axo18788-f_at	9.75e-05	2.01e-05	-9.20811	2.34731	-0.793035	C16orf53	PTIP-associated 1 protein	0.577129
axo03445-r_at	5.75e-06	5.76e-07	-14.9663	6.30522	-0.79286	FAM180A	hypothetical protein LOC389558	0.577199
axo00706-f_at	0.000282	7.17e-05	-7.68311	0.93433	-0.792283	SHF	Src homology 2 domain containing F	0.57743
axo13043-f_at	1.58e-05	2.14e-06	-12.5375	4.84313	-0.792276	SLC35A3	solute carrier family 35 member 3A	0.577433
axo10647-f_at	1.49e-05	1.99e-06	-12.6666	4.92724	-0.791956	MARS	methionyl-tRNA synthetase	0.57756
axo01378-r_at	3.77e-06	3.3e-07	-16.1187	6.92131	-0.791902	PSMB9	proteasome beta 9 subunit isoform 2 proprotein	0.577582
axo14717-r_at	2.31e-05	3.43e-06	-11.7588	4.31796	-0.791788	VPS13A	vacuolar protein sorting 13A isoform B	0.577628
axo00789-f_at	4.09e-05	6.98e-06	-10.6701	3.52811	-0.791538	KIF23	kinesin family member 23 isoform 1	0.577728
axo17468-f_at	0.000597	0.000174	-6.7451	-0.04792	-0.790528	C16orf62	hypothetical protein LOC57020	0.578132
axo13990-f_at	1.66e-05	2.29e-06	-12.4218	4.76702	-0.789808	HERPUD1	homocysteine-inducible, endoplasmic reticulum stress-inducible, ubiquitin-like domain member 1 isoform 1	0.578421
axo08484-f_at	0.000236	5.79e-05	-7.92574	1.17341	-0.788847	PRKCZ	protein kinase C, zeta isoform 1	0.578806
axo18583-f_at	5.7e-06	5.7e-07	-14.9865	6.31638	-0.788408	IFI6	interferon, alpha-inducible protein 6 isoform c	0.578982
axo01519-f_at	0.000459	0.000128	-7.06207	0.29477	-0.788212	YTHDC1	splicing factor YT521-B isoform 1	0.579061
axo13965-r_at	0.00014	3.13e-05	-8.65337	1.85706	-0.788161	PHF14	PHD finger protein 14 isoform 2	0.579082
axo08877-f_at	0.000661	0.000196	-6.62457	-0.18129	-0.788033	SRPR	signal recognition particle receptor	0.579133
axo08570-r_at	5.35e-05	9.72e-06	-10.1931	3.15918	-0.787662	PTPN11	protein tyrosine phosphatase, non-receptor type 11	0.579282
axo09690-f_at	9.13e-06	1.05e-06	-13.8031	5.63534	-0.787473	UBE2M	ubiquitin-conjugating enzyme E2M	0.579358
axo11688-f_at	0.000232	5.67e-05	-7.94785	1.19491	-0.786716	SEMA3A	semaphorin 3A precursor	0.579662
axo03222-f_at	0.000234	5.73e-05	-7.93687	1.18425	-0.785785	NPM1	nucleophosmin 1 isoform 3	0.580036
axo09986-f_at	4.85e-06	4.59e-07	-15.4282	6.55746	-0.785755	CCNG2	cyclin G2	0.580048
axo00523-f_at	5.32e-06	5.17e-07	-15.184	6.42502	-0.78512	WHSC1	Wolf-Hirschhorn syndrome candidate 1 protein isoform 1	0.580304
axo15255-f_at	1.89e-05	2.69e-06	-12.156	4.58966	-0.784496	COQ2	para-hydroxybenzoate-polyprenyltransferase, mitochondrial	0.580555
axo09406-f_s_at	9.22e-05	1.88e-05	-9.29665	2.42325	-0.784043	PPAP2A	phosphatidic acid phosphatase type 2A isoform 1	0.580737
axo02985-f_at	0.000383	0.000104	-7.28094	0.52485	-0.783988	VHL	von Hippel-Lindau tumor suppressor isoform 2	0.580759
axo01385-f_at	5.84e-06	5.86e-07	-14.9295	6.2848	-0.783766	GPRC6A	G protein-coupled receptor, family C, group 6, member A	0.580849
axo10134-r_at	2.12e-05	3.1e-06	-11.9227	4.4311	-0.783237	GPS2	G protein pathway suppressor 2	0.581062
axo16949-f_at	0.00192	0.000683	-5.46396	-1.55811	-0.783206	C20orf19	non-protein coding RNA 153	0.581074
axo07603-f_at	7.04e-05	1.36e-05	-9.73203	2.78796	-0.783143	CDK7	cyclin-dependent kinase 7	0.581099
axo07087-f_at	7.02e-06	7.41e-07	-14.4683	6.02475	-0.782588	CLIC1	chloride intracellular channel 1	0.581323
axo00998-f_at	0.00034	9.01e-05	-7.433	0.68166	-0.781542	COMTD1	catechol-O-methyltransferase domain containing 1	0.581745
axo05252-f_at	5.55e-06	5.5e-07	-15.0583	6.35606	-0.77991	MYBBP1A	MYB binding protein 1a isoform 1	0.582403
axo13405-f_at	0.000871	0.000271	-6.30825	-0.53955	-0.779787	NCKAP1	NCK-associated protein 1 isoform 1	0.582453
axo16504-f_at	4.6e-06	4.27e-07	-15.5767	6.63705	-0.779565	ATP5SL	ATP5S-like	0.582542
axo17441-f_at	3.54e-05	5.84e-06	-10.9356	3.72715	-0.779413	CDC42SE1	CDC42 small effector 1	0.582604
axo06026-r_s_at	5.34e-06	5.19e-07	-15.1743	6.41975	-0.77941	KRT5	keratin 5	0.582605
axo17384-r_at	1.46e-05	1.94e-06	-12.7088	4.95459	-0.779341	NCLN	nicalin	0.582633
axo14425-f_at	0.000759	0.000231	-6.46441	-0.36116	-0.779331	PDS5B	PDS5, regulator of cohesion maintenance, homolog B	0.582637
axo15479-f_at	0.000215	5.17e-05	-8.05554	1.29896	-0.777645	COPZ1	coatomer protein complex, subunit zeta 1	0.583318
axo03585-f_at	1.61e-05	2.21e-06	-12.4845	4.80836	-0.777062	DNAJB2	DnaJ (Hsp40) homolog, subfamily B, member 2 isoform a	0.583554
axo18619-f_at	0.00368	0.00145	-4.83122	-2.38493	-0.776318	KRI1	KRI1 homolog	0.583855
axo07054-f_at	1.88e-05	2.67e-06	-12.1672	4.59725	-0.776218	CDK9	cyclin-dependent kinase 9	0.583896
axo00959-f_at	2.05e-05	2.97e-06	-11.9935	4.47953	-0.776164	PPTC7	T-cell activation protein phosphatase 2C	0.583918
axo13626-f_at	1.04e-05	1.24e-06	-13.4949	5.44891	-0.776023	EXOSC2	exosome component 2	0.583974
axo04752-r_at	1.49e-05	1.99e-06	-12.6675	4.92785	-0.775768	UNC119B	unc-119 homolog B	0.584078
axo13342-f_at	7e-06	7.35e-07	-14.4827	6.03296	-0.775233	BLNK	B-cell linker isoform 1	0.584294
axo16879-f_at	8.73e-06	9.91e-07	-13.9134	5.70115	-0.774957	SLC35C1	GDP-fucose transporter 1 isoform a	0.584406
axo02821-f_at	8.38e-06	9.37e-07	-14.0202	5.76432	-0.77483	BIRC3	baculoviral IAP repeat-containing protein 3	0.584457
axo10279-f_at	0.00423	0.00171	-4.70203	-2.56068	-0.773873	RARG	retinoic acid receptor, gamma isoform 1	0.584845
axo16747-f_at	5.75e-05	1.06e-05	-10.0708	3.06216	-0.773833	ELP2	elongator protein 2	0.584861
axo00311-f_at	6.14e-05	1.15e-05	-9.96143	2.97453	-0.773663	U2AF1	U2 small nuclear RNA auxillary factor 1 isoform b	0.584931
axo10474-r_at	1.78e-05	2.49e-06	-12.2876	4.67796	-0.773615	TJP2	tight junction protein 2 (zona occludens 2) isoform 1	0.58495
axo05257-f_at	7.97e-05	1.58e-05	-9.52509	2.61639	-0.772958	DGKZ	diacylglycerol kinase zeta isoform 4	0.585216
axo13549-f_at	6.21e-06	6.33e-07	-14.7784	6.20042	-0.772818	SSU72	Ssu72 RNA polymerase II CTD phosphatase homolog	0.585273
axo13570-r_at	7.39e-06	7.91e-07	-14.3419	5.95205	-0.772684	RGS10	regulator of G-protein signaling 10 isoform a	0.585327
axo00721-r_at	9.16e-06	1.06e-06	-13.7948	5.63036	-0.772165	OXNAD1	oxidoreductase NAD-binding domain containing 1	0.585538
axo19058-f_at	0.000998	0.000319	-6.15268	-0.72028	-0.771865	LPCAT1	acyltransferase like 2	0.58566
axo18760-f_at	3.06e-05	4.87e-06	-11.211	3.92914	-0.771179	THOC6	WD repeat domain 58 isoform 1	0.585938
axo07093-f_at	8.99e-05	1.83e-05	-9.33495	2.4559	-0.770806	KLF6	Kruppel-like factor 6	0.58609
axo15915-f_at	5.22e-05	9.41e-06	-10.2387	3.19509	-0.7704	TNFRSF12A	tumor necrosis factor receptor superfamily, member 12A	0.586255
axo01865-r_at	0.000692	0.000207	-6.56999	-0.24224	-0.77035	PANK2	pantothenate kinase 2 isoform 2	0.586275
axo18686-f_at	3.41e-05	5.57e-06	-11.0069	3.77987	-0.770278		spermatogenesis associated 5-like 1	0.586304
axo01991-r_at	9.74e-06	1.14e-06	-13.6502	5.54333	-0.770222	CAMK2D	calcium/calmodulin-dependent protein kinase II delta isoform 2	0.586327
axo07815-f_at	0.000509	0.000144	-6.93621	0.16006	-0.76976	FGF2	fibroblast growth factor 2	0.586515
axo18584-f_at	0.00222	0.000807	-5.31994	-1.7414	-0.769174	TM9SF1	transmembrane 9 superfamily member 1 isoform b	0.586753
axo16214-r_at	0.0001	2.08e-05	-9.16848	2.31312	-0.768984	THUMPD1	THUMP domain containing 1	0.586831
axo06148-r_at	7.99e-06	8.78e-07	-14.1425	5.8362	-0.76874	DNAJA3	DnaJ (Hsp40) homolog, subfamily A, member 3 isoform 2	0.58693
axo19413-f_s_at	0.000897	0.000281	-6.2738	-0.57932	-0.768296	CFHR5	complement factor H-related 5	0.587111
axo02374-r_at	5.49e-06	5.41e-07	-15.0894	6.37316	-0.768092	AGR3	breast cancer membrane protein 11	0.587194
axo15817-f_at	0.000843	0.000261	-6.34556	-0.49666	-0.767596	ZC3HC1	zinc finger, C3HC type 1	0.587396
axo08960-f_at	0.000585	0.00017	-6.76977	-0.02083	-0.767377	TGFB2	transforming growth factor, beta 2 isoform 2	0.587485
axo17099-f_s_at	3.62e-06	3.14e-07	-16.2298	6.97841	-0.766705	UBB	ubiquitin B precursor	0.587758
axo16148-r_at	5.24e-06	5.06e-07	-15.2282	6.44918	-0.766555	OTUB1	otubain 1	0.587819
axo02602-f_at	8.4e-06	9.4e-07	-14.013	5.76009	-0.766235	RFC3	replication factor C 3 isoform 2	0.58795
axo11902-r_at	6.45e-06	6.64e-07	-14.6833	6.14691	-0.765842	S100A1	S100 calcium binding protein A1	0.58811
axo00096-f_at	1.09e-05	1.32e-06	-13.3888	5.38375	-0.765718	RPL34	ribosomal protein L34	0.588161
axo08174-f_at	3.46e-05	5.66e-06	-10.9823	3.76171	-0.765668	MMP1	matrix metalloproteinase 1 isoform 1 preproprotein	0.588181
axo19067-r_at	3.86e-05	6.51e-06	-10.7734	3.60605	-0.765453	NUP85	nucleoporin 85	0.588269
axo08521-f_at	9.07e-06	1.04e-06	-13.8181	5.64432	-0.765405	PSMB4	proteasome beta 4 subunit	0.588288
axo16979-f_at	3.87e-06	3.43e-07	-16.0393	6.88025	-0.764897	KIAA1704	hypothetical protein LOC55425	0.588495
axo00341-f_s_at	3.37e-06	2.85e-07	-16.44	7.08548	-0.764866	TUBA3D	tubulin, alpha 3d	0.588508
axo04979-f_at	8.67e-05	1.75e-05	-9.39122	2.50369	-0.764304	MID1	midline 1	0.588737
axo00019-f_at	1.99e-05	2.87e-06	-12.0522	4.5195	-0.764172	CASP7	caspase 7 isoform delta	0.588791
axo17454-f_at	0.00019	4.47e-05	-8.22399	1.45952	-0.762209	CABC1	chaperone, ABC1 activity of bc1 complex like precursor	0.589593
axo01091-r_at	0.00027	6.79e-05	-7.744	0.99487	-0.761918	PUS10	pseudouridylate synthase 10	0.589712
axo18074-f_at	4.13e-05	7.09e-06	-10.6472	3.51071	-0.761821	RHOU	ras homolog gene family, member U	0.589752
axo03528-f_at	0.00065	0.000192	-6.64368	-0.16003	-0.761691	MBNL2	muscleblind-like 2 isoform 3	0.589805
axo00791-f_at	0.000266	6.68e-05	-7.76288	1.01357	-0.761319	SFMBT2	Scm-like with four mbt domains 2	0.589957
axo20256-f_at	0.000121	2.6e-05	-8.88208	2.06227	-0.760172	CSRNP1	AXIN1 up-regulated 1	0.590426
axo18694-f_at	0.000518	0.000147	-6.91453	0.13668	-0.760002	DDX54	DEAD (Asp-Glu-Ala-Asp) box polypeptide 54 isoform 2	0.590496
axo19640-f_at	0.000147	3.31e-05	-8.58497	1.79483	-0.759783	GORASP1	Golgi reassembly stacking protein 1	0.590585
axo08884-r_at	1.19e-05	1.49e-06	-13.1705	5.24824	-0.759608	SSRP1	structure specific recognition protein 1	0.590657
axo20813-f_at	2.23e-05	3.3e-06	-11.8219	4.36166	-0.759073	FPGS	folylpolyglutamate synthase isoform a precursor	0.590876
axo17085-f_at	0.00012	2.59e-05	-8.88592	2.06567	-0.75891	C21orf45	chromosome 21 open reading frame 45	0.590943
axo08762-f_at	4.05e-05	6.89e-06	-10.6884	3.54197	-0.758238	SFRS2	splicing factor, arginine/serine-rich 2	0.591218
axo11119-r_at	4.36e-06	3.98e-07	-15.7209	6.71358	-0.758121	SMC4	SMC4 structural maintenance of chromosomes 4-like 1	0.591266
axo07900-f_at	0.00146	0.000497	-5.74614	-1.20724	-0.757749	GRN	granulin precursor	0.591418
axo15612-f_at	5.58e-05	1.02e-05	-10.1244	3.10481	-0.757377	TRIP4	thyroid hormone receptor interactor 4	0.591571
axo17321-f_at	0.000136	3.01e-05	-8.70084	1.90003	-0.757155	DIABLO	diablo isoform 1 precursor	0.591662
axo20064-f_at	1.83e-05	2.58e-06	-12.2289	4.63865	-0.757019	CNDP1	carnosinase 1	0.591718
axo13655-f_at	1.88e-05	2.66e-06	-12.1759	4.60312	-0.756247	PDSS1	prenyl diphosphate synthase, subunit 1	0.592034
axo18534-r_s_at	0.000105	2.2e-05	-9.09488	2.24928	-0.75605	RMND5B	required for meiotic nuclear division 5 homolog B	0.592115
axo16324-f_at	1.1e-05	1.35e-06	-13.3519	5.361	-0.75604	C1orf27	hypothetical protein LOC54953	0.59212
axo03849-f_at	1.05e-05	1.27e-06	-13.4604	5.42776	-0.755929		PREDICTED: hypothetical protein	0.592165
axo16930-r_at	5.3e-06	5.13e-07	-15.1988	6.43309	-0.75471	EAPP	E2F-associated phosphoprotein	0.592666
axo10711-r_at	0.000294	7.54e-05	-7.62847	0.87967	-0.754312	PRCP	prolylcarboxypeptidase isoform 1 preproprotein	0.592829
axo04830-f_at	6.3e-05	1.18e-05	-9.91897	2.94027	-0.753957	CUGBP2	CUG triplet repeat, RNA binding protein 2 isoform 4	0.592975
axo12021-r_at	0.0011	0.000356	-6.05154	-0.83942	-0.753573	PAMR1	regeneration associated muscle protease isoform b	0.593133
axo11125-f_at	0.000118	2.54e-05	-8.91337	2.09	-0.753188	UBA2	SUMO-1 activating enzyme subunit 2	0.593291
axo09935-f_at	1.96e-05	2.81e-06	-12.0854	4.542	-0.753046	ACTL6A	actin-like 6A isoform 1	0.593349
axo10947-r_at	0.00481	0.00198	-4.58366	-2.72379	-0.752806	GNB2	guanine nucleotide-binding protein, beta-2 subunit	0.593448
axo09873-f_at	0.000331	8.72e-05	-7.46875	0.71817	-0.752483	KLF4	Kruppel-like factor 4 (gut)	0.593581
axo18745-f_at	3.6e-05	5.95e-06	-10.9077	3.70645	-0.752461	NOL12	nucleolar protein 12	0.59359
axo07388-f_at	3.21e-05	5.17e-06	-11.1182	3.86161	-0.752423	IRF3	interferon regulatory factor 3	0.593606
axo01768-f_at	2.67e-05	4.11e-06	-11.4747	4.11837	-0.752307	TMPO	thymopoietin isoform beta	0.593653
axo19480-f_at	8.07e-06	8.89e-07	-14.1193	5.82263	-0.752181	CCNL2	cyclin L2 isoform A	0.593705
axo09345-f_at	0.000789	0.000242	-6.42024	-0.41132	-0.751942	IFITM1	interferon induced transmembrane protein 1 (9-27)	0.593804
axo08017-f_at	4.23e-06	3.85e-07	-15.7953	6.75282	-0.751545	JUP	junction plakoglobin	0.593967
axo02658-f_at	5.87e-06	5.9e-07	-14.9159	6.27721	-0.751362	PKIG	cAMP-dependent protein kinase inhibitor gamma	0.594042
axo03758-f_at	5.37e-06	5.25e-07	-15.1528	6.40794	-0.750895		PREDICTED: similar to hCG22561	0.594235
axo12056-r_at	4.1e-05	6.99e-06	-10.6672	3.52591	-0.750862	GPM6B	glycoprotein M6B isoform 1	0.594248
axo11008-f_at	0.000252	6.23e-05	-7.84208	1.09163	-0.750834	SMAD4	mothers against decapentaplegic homolog 4	0.59426
axo04348-f_at	7.68e-05	1.51e-05	-9.58485	2.66626	-0.75005	ATPAF1	ATP synthase mitochondrial F1 complex assembly factor 1 isoform 2 precursor	0.594583
axo09921-f_at	0.000112	2.37e-05	-8.99855	2.16508	-0.749305	CARTPT	cocaine- and amphetamine-regulated transcript	0.59489
axo03526-f_s_at	0.000113	2.4e-05	-8.9847	2.15292	-0.749089	MBNL2	muscleblind-like 2 isoform 3	0.594979
axo04156-f_at	2.12e-05	3.1e-06	-11.9257	4.43313	-0.748689	DEDD	death effector domain-containing protein	0.595144
axo05926-f_at	2.23e-05	3.3e-06	-11.8227	4.36224	-0.748688	HYOU1	hypoxia up-regulated 1 precursor	0.595145
axo16284-f_at	1.77e-05	2.48e-06	-12.2917	4.68064	-0.747702	UBE2R2	ubiquitin-conjugating enzyme UBC3B	0.595551
axo16432-f_at	1.29e-05	1.66e-06	-12.9809	5.12883	-0.747541	PTCD3	pentatricopeptide repeat domain 3	0.595618
axo16468-r_at	5.13e-06	4.91e-07	-15.2879	6.48165	-0.747333	RNF31	ring finger protein 31	0.595704
axo14784-f_at	0.00197	0.000703	-5.43938	-1.5892	-0.74687	KIAA0664	hypothetical protein LOC23277	0.595895
axo18697-f_at	6.25e-06	6.38e-07	-14.7615	6.19093	-0.746817	NOC4L	nucleolar complex associated 4 homolog	0.595917
axo16402-f_at	1.19e-05	1.48e-06	-13.1818	5.25532	-0.746613	STX17	syntaxin 17	0.596001
axo02734-r_at	4.51e-05	7.89e-06	-10.4916	3.39181	-0.746586	FAM100B	hypothetical protein LOC283991	0.596012
axo08943-f_at	0.0047	0.00193	-4.60656	-2.69208	-0.74608	C2orf3	hypothetical protein LOC6936	0.596222
axo01020-r_at	9.71e-05	2e-05	-9.21602	2.35411	-0.74598	ARHGAP5	Rho GTPase activating protein 5 isoform a	0.596263
axo06411-f_at	3.55e-05	5.85e-06	-10.9326	3.72492	-0.745655	CMKLR1	chemokine-like receptor 1 isoform a	0.596397
axo18542-f_at	2.69e-05	4.16e-06	-11.4556	4.10482	-0.745329	GINS3	GINS complex subunit 3 isoform b	0.596532
axo09511-f_at	8.27e-05	1.66e-05	-9.46473	2.56574	-0.745195	GPAA1	glycosylphosphatidylinositol anchor attachment protein 1	0.596587
axo16888-f_at	4.66e-06	4.34e-07	-15.5428	6.61891	-0.744851	MUC4	mucin 4 isoform a	0.596729
axo14105-r_at	6.09e-05	1.13e-05	-9.97747	2.98743	-0.744614	MELK	maternal embryonic leucine zipper kinase	0.596827
axo11759-f_at	0.000293	7.51e-05	-7.63303	0.88425	-0.744434	LASP1	LIM and SH3 protein 1	0.596902
axo11919-f_at	3.37e-05	5.49e-06	-11.0276	3.79513	-0.744399	TFDP2	transcription factor Dp-2 (E2F dimerization partner 2)	0.596917
axo19778-f_at	5.92e-06	5.97e-07	-14.8918	6.26384	-0.744182	FAM175B	hypothetical protein LOC23172	0.597006
axo04846-f_at	0.000266	6.68e-05	-7.76317	1.01387	-0.744144	STRN3	nuclear autoantigen isoform 1	0.597022
axo14994-f_at	0.00395	0.00157	-4.76689	-2.47215	-0.743749	LETMD1	LETM1 domain containing 1 isoform 1	0.597186
axo12543-r_at	4.49e-06	4.14e-07	-15.6388	6.67007	-0.743637	IDH3B	isocitrate dehydrogenase 3, beta subunit isoform a precursor	0.597232
axo02565-r_at	0.000547	0.000157	-6.84683	0.06331	-0.743128	WDR20	WD repeat domain 20 isoform 1	0.597443
axo10552-f_at	1.61e-05	2.2e-06	-12.4913	4.81278	-0.742772	EI24	etoposide induced 2.4 isoform 1	0.59759
axo04151-r_at	1.65e-05	2.27e-06	-12.4405	4.77933	-0.742362	LIG1	DNA ligase I	0.59776
axo18945-f_at	0.000254	6.28e-05	-7.8329	1.08261	-0.741458	ANKHD1	ankyrin repeat and KH domain containing 1 isoform 3	0.598134
axo19622-f_at	3.04e-05	4.82e-06	-11.2261	3.94006	-0.741418	RIOK1	RIO kinase 1 isoform 1	0.598151
axo20215-f_at	1.02e-05	1.21e-06	-13.5434	5.47849	-0.74103	RAB11FIP4	RAB11 family interacting protein 4 (class II)	0.598312
axo17755-f_at	0.000173	4e-05	-8.35721	1.58462	-0.74068	ARRDC3	arrestin domain containing 3	0.598457
axo20776-f_s_at	6.76e-06	7.03e-07	-14.5697	6.08259	-0.740409	HNRNPAB	heterogeneous nuclear ribonucleoprotein A/B isoform b	0.59857
axo08731-f_at	1.02e-05	1.21e-06	-13.5373	5.47481	-0.740399	SAT1	diamine N-acetyltransferase 1	0.598574
axo12165-f_at	0.000307	7.95e-05	-7.56877	0.81962	-0.73985	ASTL	astacin-like metalloendopeptidase	0.598802
axo00395-f_at	0.000107	2.26e-05	-9.05863	2.21768	-0.739353	C3orf70	hypothetical protein LOC285382	0.599008
axo13557-f_at	4.39e-05	7.62e-06	-10.5419	3.43041	-0.739085	PKP1	plakophilin 1 isoform 1a	0.599119
axo12903-f_at	9.07e-06	1.04e-06	-13.8203	5.64565	-0.738474	NCBP2	nuclear cap binding protein subunit 2, 20kDa isoform 1	0.599373
axo13122-r_at	4.8e-05	8.48e-06	-10.3876	3.31144	-0.738416	LETM1	leucine zipper-EF-hand containing transmembrane protein 1	0.599397
axo17021-f_at	6.08e-05	1.13e-05	-9.9819	2.991	-0.73837	RNF114	zinc finger protein 313	0.599416
axo12036-f_at	6.79e-05	1.3e-05	-9.7902	2.83562	-0.737872	USP16	ubiquitin specific protease 16 isoform b	0.599623
axo03026-f_s_at	3.93e-05	6.65e-06	-10.7416	3.58215	-0.737724	CXorf23	hypothetical protein LOC256643	0.599685
axo06160-r_at	0.000192	4.55e-05	-8.20388	1.44048	-0.737449	ZDHHC3	zinc finger, DHHC-type containing 3 isoform 1	0.599799
axo01582-f_at	0.00272	0.00102	-5.11958	-2.00116	-0.737303	SPRED1	sprouty-related protein 1 with EVH-1 domain	0.59986
axo08395-r_at	0.000493	0.000139	-6.97514	0.20192	-0.737019	PIGA	phosphatidylinositol N-acetylglucosaminyltransferase subunit A isoform 1	0.599978
axo09551-f_at	2.54e-05	3.86e-06	-11.5748	4.18923	-0.736871	SUCLG2	succinate-CoA ligase, GDP-forming beta subunit precursor	0.600039
axo12175-f_at	2.88e-05	4.5e-06	-11.3318	4.01637	-0.736603	TFPI2	tissue factor pathway inhibitor 2	0.600151
axo07662-r_at	1.03e-05	1.24e-06	-13.5039	5.45437	-0.736594	SLC31A1	solute carrier family 31 (copper transporters), member 1	0.600154
axo00281-f_at	9.01e-05	1.83e-05	-9.33165	2.4531	-0.736246	PEX16	peroxisomal biogenesis factor 16 isoform 2	0.6003
axo09609-r_s_at	8e-06	8.79e-07	-14.1397	5.83457	-0.736067	FUBP1	far upstream element-binding protein	0.600374
axo11374-r_at	0.00019	4.49e-05	-8.21829	1.45412	-0.735861	LPCAT3	O-acyltransferase (membrane bound) domain containing 5	0.60046
axo05021-f_at	0.00265	0.000992	-5.14523	-1.96759	-0.73556	BTBD9	BTB (POZ) domain containing 9 isoform a	0.600585
axo01213-r_at	1.31e-05	1.68e-06	-12.9574	5.11395	-0.735255	PIGM	phosphatidylinositol glycan anchor biosynthesis, class M	0.600712
axo06322-f_at	0.00175	0.000612	-5.56007	-1.4374	-0.734973	TMEM51	transmembrane protein 51	0.600829
axo06181-r_at	9.67e-06	1.13e-06	-13.6665	5.55318	-0.734379	NEU1	neuraminidase precursor	0.601077
axo12290-f_at	4.14e-06	3.74e-07	-15.8559	6.78466	-0.734005	STARD10	START domain containing 10	0.601232
axo11244-f_at	0.000144	3.23e-05	-8.61539	1.82256	-0.733527	VAMP7	vesicle-associated membrane protein 7 isoform 1	0.601432
axo18834-f_at	6.94e-06	7.28e-07	-14.5033	6.04476	-0.732877	EFTUD1	elongation factor Tu GTP binding domain containing 1 isoform 1	0.601703
axo00009-r_at	0.0032	0.00124	-4.96139	-2.21024	-0.732315	HK1	hexokinase 1 isoform HKI	0.601937
axo02121-r_at	0.00012	2.59e-05	-8.88554	2.06533	-0.732036	APLF	aprataxin and PNKP like factor	0.602053
axo09333-f_at	9.14e-06	1.05e-06	-13.8002	5.63362	-0.731755	PARG	poly (ADP-ribose) glycohydrolase	0.602171
axo18164-f_at	7.53e-06	8.1e-07	-14.2955	5.92523	-0.73133	AVPI1	vasopressin-induced protein, 32kDa	0.602348
axo07147-f_at	5.35e-06	5.21e-07	-15.1685	6.41655	-0.729434	DHCR7	7-dehydrocholesterol reductase	0.60314
axo08165-f_at	0.000745	0.000226	-6.48514	-0.33771	-0.729064	MEIS1	Meis homeobox 1	0.603295
axo16983-f_at	1.81e-05	2.54e-06	-12.2497	4.65261	-0.728574	ZMAT1	zinc finger, matrin type 1 isoform 1	0.6035
axo18906-f_at	8.34e-05	1.67e-05	-9.45055	2.5538	-0.72848	MAEA	macrophage erythroblast attacher isoform 1	0.603539
axo19278-r_at	0.000392	0.000106	-7.25413	0.49694	-0.728266	SLC35F5	solute carrier family 35, member F5	0.603629
axo13563-f_at	4.22e-05	7.27e-06	-10.6104	3.48273	-0.727855	NFYC	nuclear transcription factor Y, gamma isoform 2	0.603801
axo20154-r_at	0.000202	4.81e-05	-8.13857	1.37843	-0.727219	MASTL	microtubule associated serine/threonine kinase-like	0.604067
axo02545-f_at	5.02e-05	8.95e-06	-10.3103	3.25126	-0.727209	TIAL1	TIA-1 related protein isoform 2	0.604071
axo07534-f_at	0.000474	0.000133	-7.02213	0.25222	-0.727188	BMP7	bone morphogenetic protein 7 precursor	0.60408
axo16320-r_at	0.00264	0.00099	-5.14669	-1.96569	-0.726934	TRNAU1AP	tRNA selenocysteine associated protein 1	0.604187
axo13616-f_at	8.96e-06	1.03e-06	-13.8494	5.66302	-0.726817	C11orf58	small acidic protein isoform a	0.604236
axo00999-f_at	6.94e-05	1.33e-05	-9.75598	2.80762	-0.726791	COMTD1	catechol-O-methyltransferase domain containing 1	0.604247
axo18395-f_at	3.24e-05	5.23e-06	-11.1009	3.84897	-0.726409	CPZ	carboxypeptidase Z isoform 1	0.604406
axo14221-f_at	1.2e-05	1.5e-06	-13.158	5.24041	-0.726333	PITRM1	metalloprotease 1	0.604438
axo12621-r_at	9.57e-06	1.12e-06	-13.6911	5.56805	-0.726251	NUDT21	cleavage and polyadenylation specific factor 5	0.604473
axo13169-f_at	4.1e-05	6.99e-06	-10.6667	3.52554	-0.726046	PFAS	phosphoribosylformylglycinamidine synthase	0.604559
axo05977-f_at	0.000988	0.000315	-6.16531	-0.7055	-0.725959	IL4R	interleukin 4 receptor alpha chain isoform a precursor	0.604595
axo10046-f_at	0.000241	5.91e-05	-7.90089	1.1492	-0.725692	DYNC1I1	dynein, cytoplasmic 1, intermediate chain 1 isoform a	0.604707
axo18314-f_at	2.59e-05	3.95e-06	-11.5345	4.1608	-0.72551	CARS	cysteinyl-tRNA synthetase isoform c	0.604783
axo19887-f_at	0.000307	7.95e-05	-7.56889	0.81973	-0.725283	FBLIM1	filamin-binding LIM protein-1 isoform b	0.604878
axo03610-f_at	0.000418	0.000115	-7.17466	0.41378	-0.724998	ZNF543	zinc finger protein 543	0.604998
axo07014-r_at	5.18e-06	4.99e-07	-15.2552	6.46384	-0.724732	C1QBP	complement component 1, q subcomponent binding protein precursor	0.605109
axo03985-r_at	7.02e-06	7.4e-07	-14.4713	6.02644	-0.724704	YIF1B	Yip1 interacting factor homolog B isoform 4	0.605121
axo01314-f_at	0.000336	8.88e-05	-7.44878	0.69779	-0.724568	TRAF6	TNF receptor-associated factor 6	0.605178
axo10400-r_at	8.83e-06	1.01e-06	-13.8876	5.68579	-0.724484	SLC33A1	acetyl-coenzyme A transporter	0.605213
axo15083-r_at	9.6e-05	1.97e-05	-9.23552	2.37088	-0.72387	EGFL6	epidermal growth factor-like protein 6 precursor	0.605471
axo19374-r_at	0.00123	0.000409	-5.92305	-0.99269	-0.723338	KIAA1715	Lunapark	0.605694
axo15347-f_at	0.000144	3.22e-05	-8.61942	1.82622	-0.723112	NBAS	neuroblastoma-amplified protein	0.605789
axo06539-r_at	5.34e-05	9.67e-06	-10.2003	3.16488	-0.722836	ZNF438	zinc finger protein 438 isoform b	0.605905
axo03074-f_at	0.000928	0.000293	-6.23591	-0.62321	-0.722796	TPRG1	tumor protein p63 regulated 1	0.605922
axo20032-r_at	0.00043	0.000118	-7.14068	0.37801	-0.722739	USP32	ubiquitin specific protease 32	0.605946
axo03594-r_at	7.24e-06	7.71e-07	-14.3925	5.98121	-0.722685	PRKCD	protein kinase C, delta	0.605969
axo19506-f_at	1.94e-05	2.77e-06	-12.1058	4.55583	-0.722524	HNRNPA1	heterogeneous nuclear ribonucleoprotein A1 isoform b	0.606036
axo00887-r_at	0.000314	8.16e-05	-7.54109	0.79165	-0.7217	MAPK14	mitogen-activated protein kinase 14 isoform 3	0.606382
axo11953-f_at	0.052	0.0305	-2.64482	-5.63298	-0.721377	NCOR1	nuclear receptor co-repressor 1	0.606518
axo11802-r_at	0.000238	5.84e-05	-7.91551	1.16345	-0.721249	OAS3	2'-5'oligoadenylate synthetase 3	0.606572
axo10855-r_at	1.1e-05	1.35e-06	-13.3489	5.35915	-0.721231	RND3	ras homolog gene family, member E	0.60658
axo01424-f_at	0.000304	7.86e-05	-7.58167	0.83263	-0.721208	NCAPH2	kleisin beta isoform 2	0.606589
axo17162-f_at	0.000334	8.82e-05	-7.45622	0.70539	-0.720917	SMCR7L	hypothetical protein LOC54471	0.606711
axo09902-r_at	0.000742	0.000225	-6.49035	-0.33182	-0.720674	PNLIP	pancreatic lipase precursor	0.606814
axo06561-f_at	0.0014	0.000473	-5.78943	-1.15436	-0.719189	NOX4	NADPH oxidase 4 isoform b	0.607439
axo12463-f_at	1.28e-05	1.63e-06	-13.0131	5.14924	-0.718668		EBNA1 binding protein 2	0.607658
axo02524-f_at	5.04e-05	8.99e-06	-10.3041	3.24638	-0.718602	HM13	minor histocompatibility antigen 13 isoform 4	0.607686
axo07731-f_at	6.05e-06	6.14e-07	-14.8373	6.23345	-0.717719	DLAT	dihydrolipoamide S-acetyltransferase	0.608058
axo04392-f_at	0.000258	6.44e-05	-7.80461	1.05478	-0.717609	PVRL2	poliovirus receptor related 2 isoform delta precursor	0.608105
axo20700-f_at	5.39e-06	5.26e-07	-15.1462	6.40432	-0.717607	HIST2H2AC	histone cluster 2, H2ac	0.608105
axo12090-f_at	0.000563	0.000163	-6.81292	0.02637	-0.717495	TXNRD2	thioredoxin reductase 2 precursor	0.608152
axo07336-r_s_at	0.000444	0.000123	-7.10206	0.33721	-0.717148	GTF2B	general transcription factor IIB	0.608299
axo14724-f_at	0.000941	0.000298	-6.21939	-0.64241	-0.71708	TBC1D12	TBC1 domain family, member 12	0.608327
axo11058-f_at	9.86e-06	1.16e-06	-13.6194	5.52467	-0.716875	SLC20A1	solute carrier family 20 (phosphate transporter), member 1	0.608414
axo15427-f_at	7.53e-06	8.11e-07	-14.2943	5.92454	-0.716039	MECR	trans-2-enoyl-CoA reductase, mitochondrial isoform a	0.608767
axo12271-f_at	1.8e-05	2.52e-06	-12.264	4.6622	-0.715605	PHGDH	phosphoglycerate dehydrogenase	0.60895
axo09862-f_at	0.000174	4.03e-05	-8.34855	1.57654	-0.715518	STK17B	serine/threonine kinase 17b	0.608987
axo17291-f_at	0.000286	7.28e-05	-7.66638	0.91762	-0.715064	IRGC	immunity-related GTPase family, cinema	0.609178
axo01815-f_at	9.22e-06	1.07e-06	-13.7775	5.62	-0.714886	RNF19B	ring finger protein 19B isoform a	0.609253
axo01945-f_at	0.00078	0.000238	-6.43316	-0.39662	-0.714863	USP48	ubiquitin specific protease 48 isoform b	0.609263
axo00635-r_at	0.000133	2.92e-05	-8.73697	1.93259	-0.714828	RAD50	RAD50 homolog isoform 2	0.609278
axo16332-f_at	8.91e-06	1.02e-06	-13.8649	5.67225	-0.713838	UCKL1	uridine-cytidine kinase 1-like 1	0.609696
axo11412-r_at	1.07e-05	1.3e-06	-13.4141	5.39937	-0.713466	TOPORS	topoisomerase I binding, arginine/serine-rich	0.609853
axo00366-f_at	0.00195	0.000694	-5.45045	-1.57519	-0.713355	ZSWIM1	zinc finger, SWIM-type containing 1	0.6099
axo14692-f_at	7.07e-06	7.48e-07	-14.4498	6.01411	-0.712463	BAT2D1	HBxAg transactivated protein 2	0.610277
axo06209-f_at	5.33e-05	9.65e-06	-10.2031	3.16712	-0.712177	DCTN4	dynactin 4 (p62) isoform a	0.610398
axo10309-f_at	1.06e-05	1.28e-06	-13.4479	5.4201	-0.71193	BAP1	BRCA1 associated protein-1	0.610503
axo01794-r_at	6.25e-06	6.38e-07	-14.7622	6.19135	-0.711924	TMEM188	transmembrane protein 188	0.610505
axo20727-f_at	9.32e-05	1.9e-05	-9.28217	2.41087	-0.711898	FUBP1	far upstream element-binding protein	0.610516
axo16011-f_at	2.82e-05	4.4e-06	-11.3676	4.04199	-0.711768	CDC42BPG	CDC42 binding protein kinase gamma (DMPK-like)	0.610572
axo05318-f_at	0.000172	3.97e-05	-8.3653	1.59217	-0.710981	SCIN	scinderin isoform 1	0.610905
axo05372-r_at	0.00014	3.1e-05	-8.6639	1.86661	-0.710799	THUMPD3	THUMP domain containing 3	0.610982
axo09899-f_at	0.000209	5.01e-05	-8.09123	1.3332	-0.710542	MED27	mediator complex subunit 27	0.611091
axo18709-f_at	0.000928	0.000293	-6.23597	-0.62315	-0.710514	C2orf49	ashwin	0.611102
axo02324-f_at	0.000148	3.34e-05	-8.57262	1.78355	-0.710374	IFT88	intraflagellar transport 88 homolog isoform 1	0.611162
axo11842-f_at	1.2e-05	1.49e-06	-13.165	5.24481	-0.710308	PLCD1	phospholipase C, delta 1 isoform 2	0.61119
axo00240-f_at	4.6e-05	8.08e-06	-10.4574	3.36541	-0.710255	RBM33	RNA binding motif protein 33	0.611212
axo08516-f_at	7.03e-06	7.42e-07	-14.4647	6.02268	-0.710202	PSMB2	proteasome beta 2 subunit	0.611235
axo07627-f_at	1.29e-05	1.64e-06	-12.9965	5.13876	-0.71006	CKS2	CDC28 protein kinase 2	0.611295
axo08849-f_at	8.4e-06	9.4e-07	-14.0137	5.76054	-0.710037	SPARC	secreted protein, acidic, cysteine-rich	0.611305
axo13156-f_at	5.55e-05	1.01e-05	-10.1354	3.11353	-0.70964	TSPAN15	transmembrane 4 superfamily member 15	0.611473
axo19533-r_at	7.91e-05	1.57e-05	-9.53789	2.62709	-0.709058	TCF7L1	HMG-box transcription factor TCF-3	0.611719
axo03356-f_at	8.55e-05	1.72e-05	-9.41181	2.52111	-0.708962	USP33	ubiquitin specific protease 33 isoform 3	0.61176
axo18935-f_at	0.000254	6.28e-05	-7.83195	1.08168	-0.70895	CCDC51	coiled-coil domain containing 51	0.611765
axo16028-f_at	1.17e-05	1.45e-06	-13.2192	5.27865	-0.70891	NKRF	transcription factor NRF	0.611782
axo07382-f_at	8.84e-05	1.79e-05	-9.35936	2.47667	-0.7089	CXCL10	small inducible cytokine B10 precursor	0.611787
axo02410-f_at	4.69e-06	4.39e-07	-15.52	6.60675	-0.708843	SULT1A1	sulfotransferase family, cytosolic, 1A, phenol-preferring, member 1 isoform a	0.61181
axo06716-f_at	0.00276	0.00104	-5.10417	-2.02137	-0.708532	EML4	echinoderm microtubule associated protein like 4 isoform b	0.611942
axo12289-f_at	8.52e-06	9.59e-07	-13.9756	5.73803	-0.708215	STARD10	START domain containing 10	0.612077
axo01223-r_at	2.39e-05	3.57e-06	-11.6967	4.27473	-0.707888	TP53BP2	tumor protein p53 binding protein, 2 isoform 1	0.612216
axo11037-f_at	0.00034	9.02e-05	-7.43146	0.68009	-0.707661	PPP1R3C	protein phosphatase 1, regulatory (inhibitor) subunit 3C	0.612312
axo19794-f_at	7.03e-05	1.35e-05	-9.73529	2.79064	-0.707646	MFSD7	major facilitator superfamily domain containing 7	0.612318
axo04307-f_at	0.000103	2.15e-05	-9.12182	2.27269	-0.707597	CAST	calpastatin isoform g	0.612339
axo12958-f_at	2.88e-05	4.51e-06	-11.3301	4.01514	-0.707057	CHIC2	cysteine-rich hydrophobic domain 2	0.612569
axo06234-f_at	0.000296	7.62e-05	-7.6169	0.86807	-0.706883	TOM1	target of myb1 isoform 2	0.612642
axo18649-f_at	9.92e-05	2.06e-05	-9.18093	2.32387	-0.706462	ADRB2	adrenergic, beta-2-, receptor, surface	0.612821
axo08825-f_at	7.29e-05	1.42e-05	-9.67256	2.73898	-0.706434	SNRPA1	small nuclear ribonucleoprotein polypeptide A'	0.612833
axo15371-f_at	3.12e-05	4.99e-06	-11.1725	3.9012	-0.706153	MTERFD1	MTERF domain containing 1	0.612952
axo09114-r_at	2.85e-05	4.45e-06	-11.3495	4.02906	-0.706109	VRK1	vaccinia related kinase 1	0.612971
axo18435-f_at	1.44e-05	1.9e-06	-12.7472	4.97939	-0.706102		tetratricopeptide repeat domain 31	0.612974
axo18903-f_at	0.000158	3.6e-05	-8.4841	1.7023	-0.705809	MAK10	corneal wound healing-related protein	0.613099
axo13186-r_at	0.00567	0.00239	-4.43778	-2.92752	-0.705646	ICMT	isoprenylcysteine carboxyl methyltransferase	0.613168
axo09482-f_at	1.12e-05	1.38e-06	-13.3128	5.33685	-0.704782	SFRS9	splicing factor, arginine/serine-rich 9	0.613535
axo18139-r_at	0.000561	0.000162	-6.81815	0.03208	-0.704485	KCNN2	small conductance calcium-activated potassium channel protein 2 isoform a	0.613662
axo01342-f_at	5.62e-05	1.03e-05	-10.1117	3.09476	-0.704128	SGMS1	sphingomyelin synthase 1	0.613814
axo08633-f_at	7.95e-06	8.73e-07	-14.1539	5.84284	-0.703565	CYP2E1	cytochrome P450, family 2, subfamily E, polypeptide 1	0.614053
axo17198-r_at	0.000579	0.000168	-6.78104	-0.00849	-0.70344	PUS7	pseudouridylate synthase 7 homolog	0.614106
axo02000-f_at	0.004	0.0016	-4.75486	-2.48852	-0.702904	IL16	interleukin 16 isoform 2	0.614334
axo19335-f_at	7.54e-05	1.48e-05	-9.61792	2.69375	-0.702851	GSS	glutathione synthetase	0.614357
axo10280-f_at	0.000467	0.00013	-7.04282	0.27428	-0.70181	TTC4	tetratricopeptide repeat domain 4	0.6148
axo08542-r_at	1.11e-05	1.35e-06	-13.3409	5.35421	-0.701192	PSMD8	proteasome 26S non-ATPase subunit 8	0.615064
axo13117-f_at	3.92e-05	6.63e-06	-10.7465	3.58586	-0.701017	KIF4A	kinesin family member 4	0.615138
axo04089-r_at	2.43e-05	3.67e-06	-11.6546	4.24526	-0.700763	LOC100128533	PREDICTED: similar to hCG2013595	0.615247
axo01754-f_at	1.61e-05	2.21e-06	-12.4873	4.81017	-0.700249	C1orf83	hypothetical protein LOC127428	0.615466
axo01173-f_at	8.67e-06	9.82e-07	-13.9308	5.71147	-0.700029	CYB5RL	cytochrome b5 reductase-like	0.61556
axo08033-f_at	7.19e-06	7.64e-07	-14.4093	5.9909	-0.699837	KIFC1	kinesin family member C1	0.615642
axo09508-r_at	1.65e-05	2.26e-06	-12.4453	4.78255	-0.699813	RNGTT	RNA guanylyltransferase and 5'-phosphatase	0.615652
axo11761-f_s_at	2.27e-05	3.38e-06	-11.785	4.33614	-0.699177	LGALS4	galectin-4	0.615923
axo07571-f_at	1.55e-05	2.09e-06	-12.584	4.8735	-0.698832	CAV1	caveolin 1	0.616071
axo19644-f_at	4.14e-05	7.1e-06	-10.6452	3.50922	-0.698645	GCOM1	GRINL1A combined protein isoform 1	0.616151
axo09652-r_at	1.21e-05	1.52e-06	-13.1367	5.2271	-0.698553	ERCC8	excision repair cross-complementing rodent repair deficiency, complementation group 8 isoform 1	0.61619
axo07417-f_at	1.88e-05	2.67e-06	-12.1708	4.59967	-0.697805	PARP1	poly (ADP-ribose) polymerase family, member 1	0.61651
axo18105-f_at	6.57e-05	1.25e-05	-9.84512	2.8804	-0.697757	EPS15L1	epidermal growth factor receptor pathway substrate 15-like 1	0.61653
axo15514-f_s_at	2.22e-05	3.28e-06	-11.8321	4.36873	-0.697451	GINS2	DNA replication complex GINS protein PSF2	0.616661
axo10540-f_at	0.00475	0.00195	-4.59488	-2.70825	-0.696971	MPDU1	mannose-P-dolichol utilization defect 1	0.616866
axo08127-f_at	0.00301	0.00115	-5.0203	-2.13196	-0.696912	M6PR	cation-dependent mannose-6-phosphate receptor precursor	0.616891
axo16834-f_at	6.67e-06	6.93e-07	-14.5986	6.09898	-0.696891	C20orf29	hypothetical protein LOC55317	0.6169
axo20489-f_at	0.00183	0.000644	-5.51534	-1.49342	-0.696877	CIDEA	cell death-inducing DFFA-like effector a isoform 1	0.616906
axo10091-r_at	0.000103	2.15e-05	-9.12548	2.27587	-0.696619	ETFDH	electron-transferring-flavoprotein dehydrogenase precursor	0.617017
axo07099-f_at	3.04e-05	4.82e-06	-11.226	3.94	-0.696537	CLDN4	claudin 4	0.617052
axo05819-r_at	6.87e-06	7.18e-07	-14.5302	6.06007	-0.696376	FAM108A1	hypothetical protein LOC81926 isoform 2	0.61712
axo12037-r_at	3.22e-05	5.19e-06	-11.1125	3.8574	-0.69628	USP16	ubiquitin specific protease 16 isoform b	0.617161
axo12760-f_at	0.000103	2.16e-05	-9.11961	2.27078	-0.695584	WBP4	WW domain-containing binding protein 4	0.61746
axo07152-f_at	6.14e-06	6.24e-07	-14.8046	6.21513	-0.6955	DKC1	dyskerin isoform 1	0.617495
axo20505-f_at	0.000377	0.000102	-7.30258	0.54731	-0.694698	CTBP2	C-terminal binding protein 2 isoform 1	0.617839
axo14388-f_at	8.91e-06	1.02e-06	-13.8635	5.67143	-0.69404		RNA binding motif protein 34	0.618121
axo18769-r_at	0.000435	0.00012	-7.1276	0.36421	-0.693917	FDXR	ferredoxin reductase isoform 1 precursor	0.618173
axo02258-f_at	1.45e-05	1.92e-06	-12.7227	4.96359	-0.693557	KRTCAP2	keratinocyte associated protein 2	0.618327
axo13879-f_at	0.000288	7.37e-05	-7.65344	0.90468	-0.693314	DNTTIP2	deoxynucleotidyltransferase, terminal, interacting protein 2	0.618431
axo19037-f_at	0.000468	0.00013	-7.03949	0.27073	-0.693033	TMEM180	transmembrane protein 180	0.618552
axo15150-f_at	9.36e-06	1.09e-06	-13.7394	5.59716	-0.692453	POLDIP2	DNA polymerase delta interacting protein 2	0.618801
axo04324-r_at	9.87e-06	1.16e-06	-13.6156	5.52237	-0.692047	GEMIN8	gem (nuclear organelle) associated protein 8	0.618975
axo00233-f_at	0.000595	0.000173	-6.749	-0.04363	-0.691978	MYLK	myosin light chain kinase isoform 8	0.619005
axo09762-f_at	9.74e-05	2.01e-05	-9.21081	2.34963	-0.691273	EFNB2	ephrin B2	0.619307
axo04959-f_at	0.000245	6.04e-05	-7.87737	1.12622	-0.691256	PROS1	protein S, alpha preproprotein	0.619314
axo06473-f_at	0.000158	3.58e-05	-8.48778	1.7057	-0.691111	SPHK1	sphingosine kinase 1 isoform 3	0.619377
axo11113-f_at	0.000566	0.000164	-6.80614	0.01897	-0.690988	CHAF1A	chromatin assembly factor 1, subunit A (p150)	0.61943
axo21302-f_s_at	6.72e-06	6.99e-07	-14.5819	6.08951	-0.690108	HNRNPK	heterogeneous nuclear ribonucleoprotein K isoform a	0.619807
axo02322-r_at	3.59e-05	5.94e-06	-10.9098	3.70798	-0.689807	ADRM1	adhesion regulating molecule 1 precursor	0.619937
axo04983-f_at	1.85e-05	2.61e-06	-12.208	4.62467	-0.689559	C14orf100	JNK1-associated membrane protein isoform 2	0.620043
axo10416-f_at	0.00202	0.000724	-5.41347	-1.62205	-0.689096	TBRG4	cell cycle progression 2 protein isoform 1	0.620242
axo13968-r_at	7.57e-05	1.48e-05	-9.61231	2.68909	-0.689006	LRRC14	leucine rich repeat containing 14	0.620281
axo04473-r_at	0.000843	0.000261	-6.34468	-0.49767	-0.688835	UBTF	upstream binding transcription factor, RNA polymerase I isoform b	0.620355
axo04945-r_at	2.1e-05	3.06e-06	-11.9454	4.44662	-0.688785	ZNF207	zinc finger protein 207 isoform c	0.620376
axo19404-r_at	2.11e-05	3.07e-06	-11.9381	4.44161	-0.688761	CLPTM1L	CLPTM1-like	0.620386
axo18098-f_at	0.0519	0.0304	-2.6467	-5.63003	-0.688759	SCAF1	SR-related CTD-associated factor 1	0.620387
axo00286-f_at	4.91e-05	8.71e-06	-10.3489	3.28135	-0.688658	CCNE2	cyclin E2	0.620431
axo16144-f_at	7.95e-06	8.71e-07	-14.1566	5.84442	-0.688496	ZCCHC10	zinc finger, CCHC domain containing 10	0.6205
axo21008-f_at	1.36e-05	1.76e-06	-12.8763	5.06225	-0.688158	AK2	adenylate kinase 2 isoform a	0.620646
axo13231-r_at	1.93e-05	2.75e-06	-12.121	4.56608	-0.688104	TIMM10	translocase of inner mitochondrial membrane 10 homolog	0.620669
axo15309-f_at	1.6e-05	2.17e-06	-12.5126	4.82682	-0.687543	UMOD	uromodulin precursor	0.62091
axo13362-f_at	0.000402	0.00011	-7.22106	0.46242	-0.687457	GMPPA	GDP-mannose pyrophosphorylase A	0.620947
axo04572-r_at	7.46e-05	1.46e-05	-9.63685	2.70944	-0.686643	TMEM134	transmembrane protein 134 isoform c	0.621298
axo09079-r_at	3.09e-05	4.92e-06	-11.1946	3.91726	-0.686617	UBE2L3	ubiquitin-conjugating enzyme E2L 3 isoform 1	0.621309
axo12045-f_at	0.000136	3.01e-05	-8.70186	1.90095	-0.686507	PRDX4	peroxiredoxin 4	0.621357
axo00148-f_at	9.67e-05	1.99e-05	-9.22198	2.35924	-0.686138	TIFA	TRAF-interacting protein with a forkhead-associated domain	0.621515
axo16799-r_at	4.14e-05	7.1e-06	-10.6455	3.50943	-0.685855	BRF2	RNA polymerase III transcription initiation factor BRF2	0.621637
axo20265-f_at	5.1e-05	9.13e-06	-10.2813	3.22855	-0.685645	HIAT1	hippocampus abundant transcript 1	0.621728
axo12820-f_at	3.39e-05	5.52e-06	-11.0186	3.78853	-0.685506	B4GALT7	xylosylprotein beta 1,4-galactosyltransferase 7	0.621788
axo19372-f_at	0.000488	0.000137	-6.98683	0.21446	-0.685396	JHDM1D	jumonji C domain containing histone demethylase 1 homolog D	0.621835
axo14743-f_at	6.18e-05	1.16e-05	-9.95072	2.9659	-0.685195	BOP1	block of proliferation 1	0.621922
axo02297-f_at	5.27e-05	9.5e-06	-10.2245	3.18392	-0.684834	CCDC75	coiled-coil domain containing 75	0.622077
axo12681-r_s_at	3.03e-05	4.81e-06	-11.2304	3.94322	-0.684402	ACP1	acid phosphatase 1, soluble isoform b	0.622264
axo11591-f_at	7.83e-05	1.55e-05	-9.55174	2.63866	-0.684345	SKP2	S-phase kinase-associated protein 2 isoform 1	0.622288
axo18949-r_at	0.00032	8.35e-05	-7.51562	0.76584	-0.684131	NARS2	asparaginyl-tRNA synthetase 2, mitochondrial	0.62238
axo14185-f_at	2.12e-05	3.1e-06	-11.9231	4.43137	-0.683652	SUPT7L	SPTF-associated factor 65 gamma	0.622587
axo05968-f_at	0.00142	0.00048	-5.77668	-1.1699	-0.683374	NT5C2	5'-nucleotidase, cytosolic II	0.622707
axo15827-f_at	0.000955	0.000303	-6.20339	-0.66104	-0.683254	RANGRF	RAN guanine nucleotide release factor	0.622759
axo08469-f_at	1.84e-05	2.59e-06	-12.2195	4.63239	-0.68303	PRKACB	cAMP-dependent protein kinase catalytic subunit beta isoform 2	0.622856
axo13533-r_at	3.88e-05	6.54e-06	-10.7653	3.6	-0.68212	THYN1	thymocyte nuclear protein 1 isoform 1	0.623249
axo06563-r_at	0.000664	0.000197	-6.61871	-0.1878	-0.681832	NOX4	NADPH oxidase 4 isoform c	0.623373
axo17285-r_s_at	7.62e-06	8.25e-07	-14.2619	5.90576	-0.681475	RBMXL1	kynurenine aminotransferase III isoform 3	0.623528
axo05563-f_at	0.00074	0.000224	-6.49403	-0.32766	-0.680534	CDCA7L	cell division cycle associated 7-like isoform 3	0.623934
axo20529-f_at	0.000659	0.000195	-6.62819	-0.17725	-0.679255	ESRRG	estrogen-related receptor gamma isoform 2	0.624488
axo15917-f_at	5.78e-05	1.07e-05	-10.0628	3.05582	-0.679129	MRPS30	mitochondrial ribosomal protein S30	0.624542
axo14792-f_at	7.63e-05	1.5e-05	-9.59655	2.67599	-0.678946	NUP160	nucleoporin 160kDa	0.624621
axo13423-f_at	0.00104	0.000334	-6.11093	-0.76931	-0.678752	NRG1	neuregulin 1 isoform HRG-beta2	0.624705
axo05365-r_at	0.000134	2.94e-05	-8.72817	1.92466	-0.677839	ENTPD6	ectonucleoside triphosphate diphosphohydrolase 6 isoform 2	0.625101
axo12118-r_at	7.54e-06	8.13e-07	-14.2894	5.92168	-0.677674	POLR3C	polymerase (RNA) III (DNA directed) polypeptide C (62kD)	0.625172
axo06305-r_at	8.19e-05	1.64e-05	-9.48009	2.57865	-0.677662	OTUD5	OTU domain containing 5 isoform b	0.625177
axo01966-f_at	0.000762	0.000232	-6.4599	-0.36628	-0.677048	TRIM39	tripartite motif-containing 39 isoform 2	0.625444
axo18373-f_at	0.00154	0.000527	-5.69289	-1.27263	-0.676864	NCAPG	chromosome condensation protein G	0.625524
axo01123-f_at	0.000763	0.000232	-6.45804	-0.36838	-0.67677	SOCS5	suppressor of cytokine signaling 5	0.625564
axo06589-f_at	2.41e-05	3.63e-06	-11.6705	4.25639	-0.676404	WEE1	WEE1 tyrosine kinase isoform 2	0.625723
axo07574-f_at	0.00115	0.000375	-6.0024	-0.89779	-0.676323	CBR1	carbonyl reductase 1	0.625758
axo15953-f_at	0.00483	0.00199	-4.581	-2.72748	-0.676252	HOXC13	homeobox C13	0.625789
axo07119-r_at	7.32e-06	7.8e-07	-14.3678	5.96699	-0.676225	CSTF2	cleavage stimulation factor subunit 2	0.625801
axo02879-f_at	8.06e-05	1.6e-05	-9.50619	2.60056	-0.676224	RNF14	ring finger protein 14 isoform 1	0.625801
axo00520-f_at	0.000268	6.73e-05	-7.75526	1.00603	-0.67613	WHSC1	Wolf-Hirschhorn syndrome candidate 1 protein isoform 1	0.625842
axo04871-r_at	5.88e-05	1.09e-05	-10.0368	3.035	-0.675825	C5orf33	hypothetical protein LOC133686 isoform 1	0.625974
axo20331-f_at	1.92e-05	2.73e-06	-12.1323	4.57374	-0.675737	PPP1R14A	protein phosphatase 1, regulatory (inhibitor) subunit 14A	0.626012
axo04943-r_at	0.00096	0.000305	-6.19747	-0.66794	-0.675669	DDX17	DEAD box polypeptide 17 isoform 3	0.626042
axo15852-f_at	0.000178	4.16e-05	-8.31079	1.54122	-0.675201	KLF3	Kruppel-like factor 3 (basic)	0.626245
axo03672-f_at	0.000283	7.21e-05	-7.67814	0.92936	-0.674859	PICK1	protein interacting with C kinase 1	0.626393
axo02937-f_at	3.39e-05	5.52e-06	-11.0202	3.78967	-0.67483	LBR	lamin B receptor	0.626406
axo12967-f_at	0.000129	2.84e-05	-8.77365	1.96554	-0.674496	CHORDC1	cysteine and histidine-rich domain-containing protein 1 isoform a	0.626551
axo14253-f_at	2.25e-05	3.33e-06	-11.81	4.35347	-0.673648	CHSY1	carbohydrate (chondroitin) synthase 1	0.626919
axo09360-r_at	6.85e-05	1.31e-05	-9.77381	2.82222	-0.673509	BCAS1	breast carcinoma amplified sequence 1	0.62698
axo01161-f_at	0.000142	3.16e-05	-8.64129	1.84611	-0.673488	TSNARE1	t-SNARE domain containing 1	0.626989
axo00782-f_at	6.77e-06	7.05e-07	-14.5663	6.08062	-0.673464	C6orf129	hypothetical protein LOC154467	0.627
axo12424-f_at	9.07e-06	1.04e-06	-13.82	5.64547	-0.672868	EHD1	EH-domain containing 1	0.627259
axo03024-f_at	0.000293	7.5e-05	-7.63361	0.88483	-0.672609	MPZL3	myelin protein zero-like 3	0.627371
axo17194-f_at	1.08e-05	1.31e-06	-13.4007	5.39112	-0.672572	ANO9	tumor protein p53 inducible protein 5	0.627387
axo16348-f_at	2.1e-05	3.07e-06	-11.9409	4.44353	-0.6722	ASB6	ankyrin repeat and SOCS box-containing 6 isoform 1	0.627549
axo16702-f_at	1.04e-05	1.24e-06	-13.4963	5.44973	-0.672198	LRRC1	leucine rich repeat containing 1	0.62755
axo00022-f_at	0.000836	0.000258	-6.35452	-0.48638	-0.671506	KRAS	c-K-ras2 protein isoform a precursor	0.627851
axo18682-f_at	6.62e-05	1.26e-05	-9.83164	2.86944	-0.671299	C17orf39	hypothetical protein LOC79018	0.627941
axo17852-f_at	0.000139	3.08e-05	-8.67324	1.87507	-0.671099	KIAA1524	p90 autoantigen	0.628028
axo17568-r_at	0.00167	0.000579	-5.60872	-1.37676	-0.670764	NIPAL3	NIPA-like domain containing 3	0.628174
axo11327-f_at	0.000517	0.000147	-6.9156	0.13783	-0.670327	CTDSP2	nuclear LIM interactor-interacting factor 2	0.628364
axo11199-f_at	2.11e-05	3.07e-06	-11.9385	4.44188	-0.670121	CPT2	carnitine O-palmitoyltransferase precursor	0.628454
axo13263-f_at	1.02e-05	1.21e-06	-13.5422	5.47775	-0.670092	FLRT2	fibronectin leucine rich transmembrane protein 2	0.628467
axo02075-f_at	1.67e-05	2.31e-06	-12.4139	4.76178	-0.670063	UBE2Q2	ubiquitin-conjugating enzyme E2Q family member 2 isoform 1	0.628479
axo17616-f_at	2.59e-05	3.95e-06	-11.5352	4.16129	-0.669722	SPC25	spindle pole body component 25	0.628628
axo05880-f_at	4.19e-05	7.2e-06	-10.6241	3.49316	-0.668778	CLEC2A	C-type lectin domain family 2, member A	0.629039
axo13612-r_at	0.00272	0.00103	-5.1177	-2.00363	-0.668291	YME1L1	YME1-like 1 isoform 3	0.629252
axo14989-r_at	0.0011	0.000359	-6.04312	-0.8494	-0.667496	DCAF12	WD repeat domain 40A	0.629598
axo07021-f_at	0.000322	8.41e-05	-7.50731	0.7574	-0.667222	CAMK2G	calcium/calmodulin-dependent protein kinase II gamma isoform 4	0.629718
axo19896-f_at	9.18e-06	1.06e-06	-13.7863	5.62531	-0.666746	C3orf26	hypothetical protein LOC84319	0.629926
axo09927-f_at	0.000651	0.000193	-6.64225	-0.16161	-0.666532	NUP155	nucleoporin 155kDa isoform 2	0.630019
axo17016-f_at	0.00192	0.000685	-5.46225	-1.56028	-0.666501	ACSS2	acyl-CoA synthetase short-chain family member 2 isoform 1	0.630033
axo16673-f_at	5.06e-05	9.04e-06	-10.2961	3.24013	-0.666408	ATAD3A	ATPase family, AAA domain containing 3A	0.630073
axo08222-r_at	0.00242	0.000894	-5.23318	-1.85318	-0.666352	MUC5B	mucin 5, subtype B, tracheobronchial	0.630098
axo09493-f_at	0.00168	0.000584	-5.60165	-1.38556	-0.666046	KLKB1	plasma kallikrein B1 precursor	0.630231
axo01898-f_at	0.000182	4.25e-05	-8.28509	1.51709	-0.666029	SNX14	sorting nexin 14 isoform a	0.630239
axo07141-r_at	0.000118	2.53e-05	-8.9181	2.09419	-0.665915	DHX9	DEAH (Asp-Glu-Ala-His) box polypeptide 9	0.630289
axo01431-f_at	2.53e-05	3.84e-06	-11.5812	4.19369	-0.66591	TRMT61A	tRNA(m1A58)-methyltransferase subunit TRM61	0.630291
axo04656-f_at	0.000884	0.000276	-6.29275	-0.55743	-0.665797	KIAA0368	KIAA0368 protein	0.63034
axo10970-f_at	4.01e-05	6.8e-06	-10.7072	3.55622	-0.665706	H3F3B	H3 histone, family 3B	0.63038
axo02944-f_at	0.000329	8.65e-05	-7.47734	0.72693	-0.664538	RNF126	ring finger protein 126	0.630891
axo10253-f_at	0.000368	9.88e-05	-7.33288	0.57869	-0.664502	SFRS8	splicing factor, arginine/serine-rich 8	0.630906
axo17192-f_at	3.19e-05	5.13e-06	-11.13	3.87023	-0.664476	MTRF1L	mitochondrial translational release factor 1-like isoform a	0.630918
axo03406-f_at	0.001	0.00032	-6.14986	-0.72359	-0.664351	C20orf27	hypothetical protein LOC54976	0.630973
axo10691-r_s_at	6.37e-06	6.54e-07	-14.7114	6.16281	-0.664293	PFN1	profilin 1	0.630998
axo10555-f_at	0.00195	0.000697	-5.44635	-1.58038	-0.664278	CXCL14	small inducible cytokine B14 precursor	0.631004
axo16210-f_at	0.000409	0.000112	-7.20039	0.44078	-0.66344	EPS8L1	epidermal growth factor receptor pathway substrate 8-like protein 1 isoform b	0.631371
axo06598-f_at	0.000228	5.54e-05	-7.97527	1.22151	-0.663404	LPXN	leupaxin isoform 1	0.631387
axo01050-f_at	7.99e-06	8.78e-07	-14.1431	5.83653	-0.663253	FAM76B	hypothetical protein LOC143684	0.631453
axo02655-f_at	0.00105	0.000339	-6.09793	-0.78462	-0.663248	DPY19L4	dpy-19-like 4	0.631455
axo05388-f_at	0.003	0.00115	-5.02235	-2.12925	-0.663044	NBEAL1	neurobeachin-like 1 isoform 3	0.631544
axo11979-r_at	2.41e-05	3.62e-06	-11.6757	4.26007	-0.661986	EMG1	C2f protein	0.632008
axo11926-f_at	0.0159	0.00781	-3.56609	-4.20415	-0.66195	TLN1	talin 1	0.632024
axo14266-f_at	8.32e-05	1.67e-05	-9.4546	2.55721	-0.66192	SAPS1	SAPS domain family, member 1	0.632037
axo14385-r_at	5.65e-05	1.04e-05	-10.1001	3.08549	-0.661547	TMEM41B	transmembrane protein 41B	0.6322
axo15815-f_at	0.000424	0.000117	-7.1578	0.39605	-0.66069	C14orf100	JNK1-associated membrane protein isoform 1	0.632576
axo14643-f_at	7.1e-05	1.37e-05	-9.71625	2.77499	-0.660174	SLC35D1	solute carrier family 35 (UDP-glucuronic acid/UDP-N-acetylgalactosamine dual transporter), member D1	0.632802
axo18258-f_at	1.46e-05	1.94e-06	-12.7054	4.95239	-0.659913	SDF2L1	stromal cell-derived factor 2-like 1 precursor	0.632916
axo08393-r_at	7.99e-06	8.78e-07	-14.1425	5.83619	-0.659258	SERPINB5	serine (or cysteine) proteinase inhibitor, clade B (ovalbumin), member 5	0.633204
axo00744-f_at	0.000878	0.000274	-6.29892	-0.55031	-0.659124	SAAL1	serum amyloid A-like 1	0.633263
axo09985-f_at	6.76e-05	1.29e-05	-9.79661	2.84086	-0.659084	CCNG2	cyclin G2	0.63328
axo05368-f_at	0.00457	0.00187	-4.63131	-2.65789	-0.659029	CDC27	cell division cycle protein 27 isoform 1	0.633305
axo19847-f_at	0.000183	4.29e-05	-8.2735	1.5062	-0.658396	SYT3	synaptotagmin III	0.633582
axo12050-r_at	1.3e-05	1.66e-06	-12.9773	5.12655	-0.658157	AGR2	anterior gradient 2 homolog	0.633687
axo18746-f_at	0.000313	8.14e-05	-7.54417	0.79476	-0.657969	LENG1	leukocyte receptor cluster (LRC) member 1	0.63377
axo04195-r_at	3.93e-05	6.66e-06	-10.7397	3.58071	-0.65796	NRF1	nuclear respiratory factor 1	0.633774
axo18356-f_at	7.54e-06	8.14e-07	-14.2873	5.92048	-0.657681	IFIH1	interferon induced with helicase C domain 1	0.633896
axo05244-f_at	0.00027	6.78e-05	-7.74699	0.99784	-0.657548	C1orf26	hypothetical protein LOC54823	0.633955
axo12623-f_at	2.46e-05	3.71e-06	-11.6355	4.23187	-0.657324	CPSF6	cleavage and polyadenylation specific factor 6, 68 kD subunit	0.634053
axo17286-r_at	4.11e-05	7.03e-06	-10.6599	3.52034	-0.657248	IRGC	immunity-related GTPase family, cinema	0.634087
axo20982-f_s_at	9.66e-06	1.13e-06	-13.6686	5.55449	-0.657144	NONO	non-POU domain containing, octamer-binding isoform 1	0.634133
axo12460-f_at	0.000595	0.000173	-6.74879	-0.04386	-0.657115	ACOT2	peroxisomal long-chain acyl-coA thioesterase	0.634145
axo14063-f_at	0.000125	2.72e-05	-8.82615	2.01249	-0.65703	MTSS1	metastasis suppressor 1	0.634183
axo08435-r_at	0.000355	9.48e-05	-7.37751	0.62472	-0.656826	POLE2	DNA polymerase epsilon subunit 2	0.634272
axo05686-f_at	0.000818	0.000252	-6.37981	-0.45743	-0.656605	VGLL4	vestigial like 4 isoform a	0.634369
axo05799-f_at	0.045	0.0257	-2.75642	-5.45828	-0.656232	MYO9B	myosin IXB isoform 2	0.634533
axo15872-r_at	0.000121	2.61e-05	-8.87777	2.05844	-0.655876	BFAR	bifunctional apoptosis regulator	0.63469
axo03380-f_at	0.000977	0.000311	-6.17751	-0.69124	-0.655137	ALOX15B	arachidonate 15-lipoxygenase, second type isoform a	0.635015
axo03175-r_at	0.000178	4.14e-05	-8.31444	1.54464	-0.654856	NUP43	nucleoporin 43kDa	0.635139
axo09408-f_at	0.000946	0.000299	-6.21432	-0.64832	-0.654718	PPAP2C	phosphatidic acid phosphatase type 2C isoform 1	0.6352
axo18866-r_at	1.35e-05	1.74e-06	-12.8934	5.07315	-0.65466	SFRS14	splicing factor, arginine/serine-rich 14	0.635225
axo17601-r_at	0.000137	3.02e-05	-8.695	1.89475	-0.654409	TWSG1	twisted gastrulation	0.635336
axo15497-r_at	0.000313	8.13e-05	-7.54424	0.79483	-0.653344	VPS36	vacuolar protein sorting 36	0.635805
axo03100-f_at	9.82e-06	1.16e-06	-13.6289	5.53045	-0.653045	HDDC3	HD domain containing 3	0.635937
axo19074-f_at	0.000796	0.000244	-6.40953	-0.42352	-0.653036	RCCD1	RCC1 domain containing 1	0.635941
axo04584-f_at	0.00017	3.93e-05	-8.3775	1.60354	-0.652758	TRAPPC6B	trafficking protein particle complex 6B isoform 1	0.636063
axo08512-f_at	8.25e-06	9.16e-07	-14.0616	5.78873	-0.652219	PSMA5	proteasome alpha 5 subunit	0.636301
axo03310-r_at	9.71e-05	2.01e-05	-9.2139	2.35229	-0.652073	MUTED	muted	0.636365
axo16056-f_at	0.00066	0.000196	-6.62581	-0.1799	-0.652054	FAM48A	family with sequence similarity 48, member A isoform b	0.636373
axo12864-r_at	0.000487	0.000137	-6.98801	0.21572	-0.651854	PSEN1	presenilin 1 isoform I-463	0.636462
axo17678-f_at	4.58e-05	8.03e-06	-10.4655	3.37168	-0.651715	XPO5	exportin 5	0.636523
axo13874-f_at	3.29e-05	5.33e-06	-11.0719	3.82768	-0.651432	EXT1	exostosin 1	0.636648
axo02877-f_at	7.83e-06	8.55e-07	-14.1933	5.86588	-0.650891	RNF14	ring finger protein 14 isoform 1	0.636887
axo12829-f_at	3.77e-05	6.31e-06	-10.8182	3.63969	-0.650219	GPN1	GPN-loop GTPase 1 isoform a	0.637183
axo16720-f_at	0.000403	0.00011	-7.21847	0.45971	-0.650185	UBA6	ubiquitin-activating enzyme E1-like 2	0.637199
axo09893-f_at	0.000394	0.000107	-7.2473	0.48983	-0.650017	SEMA4F	semaphorin W	0.637273
axo09753-f_s_at	1.08e-05	1.3e-06	-13.4091	5.39628	-0.649811	CTSS	cathepsin S preproprotein	0.637364
axo13031-r_at	9.87e-06	1.17e-06	-13.6138	5.52128	-0.649581	NUBP2	nucleotide binding protein 2 (MinD homolog, E. coli)	0.637466
axo04952-f_at	0.00116	0.000379	-5.99259	-0.90947	-0.649447	GPR116	G-protein coupled receptor 116	0.637525
axo09203-f_at	0.000447	0.000124	-7.09417	0.32884	-0.648777	NRIP1	nuclear receptor interacting protein 1	0.637821
axo00614-f_at	0.00025	6.19e-05	-7.84876	1.09819	-0.648771	CCBE1	collagen and calcium binding EGF domains 1	0.637823
axo08468-f_at	0.00437	0.00177	-4.67137	-2.60274	-0.64862	PRKACA	cAMP-dependent protein kinase catalytic subunit alpha isoform 1	0.63789
axo19052-f_at	1.2e-05	1.49e-06	-13.1644	5.24446	-0.648389	UBA5	ubiquitin-activating enzyme 5 isoform 1	0.637993
axo04977-f_at	2.94e-05	4.63e-06	-11.2873	3.98433	-0.648281	C14orf109	hypothetical protein LOC26175 isoform 1	0.63804
axo18245-f_at	0.000141	3.15e-05	-8.64624	1.8506	-0.648177	TMSB15A	thymosin-like 8	0.638086
axo18386-f_at	9.8e-05	2.03e-05	-9.20029	2.34057	-0.648065	TFB2M	transcription factor B2, mitochondrial	0.638136
axo13717-r_at	2.09e-05	3.04e-06	-11.9545	4.45287	-0.647988	GNL3	guanine nucleotide binding protein-like 3 isoform 1	0.63817
axo03203-r_at	2.03e-05	2.95e-06	-12.0065	4.48839	-0.647817	TH1L	TH1-like protein	0.638245
axo04866-f_at	3.54e-05	5.83e-06	-10.938	3.72895	-0.647453	TOR2A	torsin family 2, member A isoform a	0.638406
axo19965-f_at	0.00014	3.11e-05	-8.65958	1.86269	-0.64745	STK19	serine/threonine kinase 19 isoform 2	0.638408
axo08658-f_at	2.18e-05	3.21e-06	-11.87	4.39487	-0.647202	RBMS2	RNA binding motif, single stranded interacting protein 2	0.638518
axo15448-r_at	1.12e-05	1.38e-06	-13.3059	5.33256	-0.646806	METTL9	methyltransferase like 9 isoform 1	0.638693
axo04255-r_at	0.00272	0.00103	-5.11757	-2.0038	-0.646793	MLH1	MutL protein homolog 1	0.638699
axo08168-f_at	5.8e-05	1.07e-05	-10.0591	3.05287	-0.646608	MGAT2	mannosyl (alpha-1,6-)-glycoprotein beta-1,2-N-acetylglucosaminyltransferase	0.638781
axo10377-r_at	6.2e-05	1.16e-05	-9.94605	2.96214	-0.646567	RPL7A	ribosomal protein L7a	0.638799
axo15746-r_at	0.000286	7.28e-05	-7.66718	0.91842	-0.646303	NAT8B	N-acetyltransferase 8B	0.638916
axo10568-r_at	0.000191	4.51e-05	-8.21348	1.44957	-0.646253	WTAP	Wilms' tumour 1-associating protein isoform 1	0.638938
axo02812-f_at	0.00168	0.000585	-5.59943	-1.38832	-0.6462	TICAM1	toll-like receptor adaptor molecule 1	0.638961
axo01215-f_at	1.93e-05	2.75e-06	-12.1203	4.5656	-0.645718	SFT2D1	SFT2 domain containing 1	0.639174
axo08532-f_at	4.41e-05	7.68e-06	-10.5298	3.42114	-0.645386	PSMC5	proteasome 26S ATPase subunit 5	0.639322
axo19666-f_at	0.00184	0.00065	-5.50809	-1.50253	-0.645246	CDCA7	cell division cycle associated 7 isoform 1	0.639384
axo03504-f_at	0.013	0.00623	-3.72676	-3.96176	-0.645167	RGS19	G protein signalling regulator 19	0.639419
axo16923-f_at	1.22e-05	1.53e-06	-13.1226	5.21825	-0.64516	UBAP2	ubiquitin associated protein 2	0.639422
axo18425-r_at	0.000482	0.000135	-7.00156	0.23023	-0.645078	TMEM168	transmembrane protein 168	0.639458
axo02163-f_at	8.89e-05	1.81e-05	-9.34964	2.46841	-0.644853	RNF149	ring finger protein 149	0.639558
axo03096-r_at	0.000331	8.73e-05	-7.46693	0.71632	-0.644814	GALNTL4	UDP-N-acetyl-alpha-D-galactosamine:polypeptide N-acetylgalactosaminyltransferase-like 4	0.639575
axo12707-f_at	0.000938	0.000296	-6.22339	-0.63776	-0.644577	USF1	upstream stimulatory factor 1 isoform 1	0.63968
axo07671-f_at	0.00184	0.000651	-5.50592	-1.50526	-0.644482	CPA1	carboxypeptidase A1 precursor	0.639722
axo01906-f_at	8.52e-05	1.72e-05	-9.41805	2.52638	-0.64435	H1FOO	H1 histone family, member O, oocyte-specific	0.639781
axo09990-f_at	2.64e-05	4.06e-06	-11.4944	4.13238	-0.64427	CDH1	cadherin 1, type 1 preproprotein	0.639817
axo18294-r_at	7.2e-05	1.4e-05	-9.69159	2.75468	-0.643956	CHTF18	CTF18, chromosome transmission fidelity factor 18 homolog	0.639956
axo15388-r_at	3.71e-05	6.18e-06	-10.8501	3.66357	-0.643837	FCF1	FCF1 small subunit	0.640009
axo17102-f_s_at	4.56e-05	7.98e-06	-10.4741	3.37832	-0.643712	UBB	ubiquitin B precursor	0.640064
axo20191-f_at	2.13e-05	3.12e-06	-11.9136	4.42484	-0.643695	DISP1	dispatched A	0.640072
axo12315-r_at	0.000621	0.000182	-6.69778	-0.10007	-0.643361	USP19	ubiquitin specific peptidase 19	0.64022
axo06546-r_at	2.01e-05	2.9e-06	-12.0311	4.50511	-0.643278	BDNF	brain-derived neurotrophic factor isoform e	0.640257
axo16906-f_at	4.8e-05	8.49e-06	-10.3855	3.30978	-0.642806	TMEM63B	transmembrane protein 63B	0.640466
axo05667-f_at	0.000321	8.39e-05	-7.51044	0.76058	-0.642179	VPS53	vacuolar protein sorting 53 isoform 1	0.640745
axo18559-f_at	1.49e-05	1.99e-06	-12.6599	4.92292	-0.641807	SNRPN	small nuclear ribonucleoprotein polypeptide N	0.64091
axo10788-r_at	0.0017	0.000592	-5.58938	-1.40084	-0.641688	COL7A1	alpha 1 type VII collagen precursor	0.640963
axo00610-f_at	0.0421	0.0239	-2.80612	-5.38046	-0.641591	NIPBL	delangin isoform A	0.641006
axo09419-f_at	0.000225	5.48e-05	-7.98858	1.2344	-0.641407	CDC2L5	cell division cycle 2-like 5 isoform 1	0.641088
axo18706-r_at	1.79e-05	2.5e-06	-12.2766	4.67057	-0.64081	KDELC1	KDEL (Lys-Asp-Glu-Leu) containing 1	0.641353
axo07535-f_at	2.99e-05	4.73e-06	-11.2568	3.96233	-0.640788	POLR3D	polymerase (RNA) III (DNA directed) polypeptide D	0.641363
axo13441-r_at	3.79e-05	6.35e-06	-10.8087	3.63257	-0.640398	SACM1L	suppressor of actin 1	0.641536
axo10079-f_at	0.000621	0.000182	-6.69804	-0.09978	-0.639929	EPHB3	ephrin receptor EphB3 precursor	0.641745
axo15805-r_at	0.000258	6.4e-05	-7.81095	1.06103	-0.639912	TMEM138	transmembrane protein 138	0.641752
axo05046-f_at	0.000124	2.7e-05	-8.83378	2.0193	-0.63989	ACTN1	actinin, alpha 1 isoform b	0.641762
axo09280-r_at	2.13e-05	3.12e-06	-11.9141	4.42517	-0.639795	CUL1	cullin 1	0.641804
axo02794-f_at	0.000189	4.45e-05	-8.23031	1.46549	-0.639707	WASH1	WAS protein family homolog 1	0.641843
axo14727-r_at	1.06e-05	1.27e-06	-13.4553	5.42464	-0.639586	DNAJC9	DnaJ homolog, subfamily C, member 9	0.641897
axo08564-r_at	0.00136	0.000457	-5.82089	-1.11607	-0.639504	PTPN4	protein tyrosine phosphatase, non-receptor type 4	0.641934
axo08341-f_at	0.00228	0.000833	-5.29332	-1.77558	-0.639434	PARN	poly(A)-specific ribonuclease (deadenylation nuclease) isoform 1	0.641965
axo15545-f_at	0.000131	2.88e-05	-8.75729	1.95086	-0.638845	TMEM66	transmembrane protein 66	0.642227
axo11458-f_at	3.66e-05	6.09e-06	-10.8718	3.67971	-0.638509	NET1	neuroepithelial cell transforming gene 1 isoform 2	0.642376
axo19363-f_at	0.000188	4.41e-05	-8.24106	1.47564	-0.637087	SLC25A21	solute carrier family 25 (mitochondrial oxodicarboxylate carrier), member 21	0.64301
axo19600-f_at	0.000126	2.74e-05	-8.81594	2.00338	-0.637011	CCDC3	coiled-coil domain containing 3	0.643044
axo16835-f_at	0.000106	2.23e-05	-9.07585	2.23271	-0.636986	FGD6	FYVE, RhoGEF and PH domain containing 6	0.643055
axo21491-f_s_at	3.46e-05	5.67e-06	-10.98	3.76007	-0.636919	TRIM69	tripartite motif-containing 69 isoform a	0.643085
axo18304-r_at	0.000541	0.000155	-6.85996	0.07759	-0.636309	XPNPEP3	X-prolyl aminopeptidase (aminopeptidase P) 3, putative	0.643357
axo01702-r_at	4.11e-05	7.03e-06	-10.6599	3.5204	-0.635937	WTAP	Wilms' tumour 1-associating protein isoform 2	0.643523
axo03276-r_at	0.00063	0.000185	-6.68082	-0.11883	-0.635819	SPG7	spastic paraplegia 7 isoform 2	0.643575
[truncated: 12,959 more rows]
