# Supplementary material for: Comparative Transcriptomics of Rat and Axolotl After Spinal Cord Injury Dissects Differences and Similarities in Inflammatory and Matrix Remodeling Gene Expression Patterns
Source: Front Neurosci. 2018 Nov 13;12:808. doi: 10.3389/fnins.2018.00808 (PMC6262295; doi:10.3389/fnins.2018.00808)
Supplement: Supplementary file 6 [file Table_6.XLSX]

## Sheet: AXO DAY7
Axolotl DAY 7
Genes are sorted by Fold-Change (FC) Injury / Control. Negative values are downregulated after Injury and positive values are upregulated after Injury. T-test p-value. Benjamini-Hochberg adjusted p-value. Unlog2 is also shown.
UNINJURED VS SCI DAY 7
DOWNLOADED FROM: https://www.ncbi.nlm.nih.gov/geo/query/acc.cgi?acc=GSE71934
ID	adj.P.Val	P.Value	t	B	logFC	Gene symbol (human homolog)	Gene name (human homolog)	unlog2
axo08180-f_at	3.19e-08	1.8e-10	-39.3518	14.966	-5.24195	MMP3	matrix metalloproteinase 3 preproprotein	0.026425
axo06854-f_at	4.01e-09	7.62e-12	-58.4144	18.0647	-4.46856	MMP1	matrix metalloproteinase 1 isoform 2	0.045168
axo08053-f_at	2.34e-09	3.26e-12	-64.9465	18.8364	-4.35608	KRT15	keratin 15	0.0488302
axo06338-r_at	1.59e-09	1.35e-12	-72.5183	19.604	-4.32726	ALOX12B	arachidonate 12-lipoxygenase, 12R type	0.0498157
axo08181-f_at	1.87e-09	1.67e-12	-70.5732	19.4183	-4.17951	MMP3	matrix metalloproteinase 3 preproprotein	0.0551876
axo08178-f_at	1.52e-09	1.13e-12	-74.0909	19.7488	-4.08992	MMP3	matrix metalloproteinase 3 preproprotein	0.0587233
axo00298-f_at	2.15e-09	2.43e-12	-67.3609	19.0947	-4.06645	PSAT1	phosphoserine aminotransferase isoform 1	0.0596867
axo07473-f_at	2.16e-09	2.78e-12	-66.2406	18.9765	-3.87744	AREG	amphiregulin preproprotein	0.0680418
axo00407-f_at	2.16e-09	2.8e-12	-66.1898	18.9711	-3.81355	TREX2	three prime repair exonuclease 2	0.0711225
axo08175-f_at	2.78e-09	4.56e-12	-62.2681	18.5335	-3.73872	MMP1	matrix metalloproteinase 1 isoform 1 preproprotein	0.0749091
axo14037-f_at	8.37e-09	2.4e-11	-50.6039	16.9746	-3.71933	FAM115A	hypothetical protein LOC9747	0.0759223
axo05637-f_at	1.79e-08	8.03e-11	-43.5212	15.7831	-3.69816	PRG4	proteoglycan 4 isoform D	0.0770446
axo15307-f_at	4.82e-09	1.06e-11	-56.0839	17.7604	-3.58773	PRLH	prolactin releasing hormone	0.0831739
axo10795-f_at	2.24e-08	1.06e-10	-42.0163	15.4993	-3.47769	GFPT2	glutamine-fructose-6-phosphate transaminase 2	0.089766
axo02986-f_at	4.72e-09	9.86e-12	-56.5599	17.8239	-3.45405	GRHL3	sister-of-mammalian grainyhead protein isoform 2	0.091249
axo03268-f_at	7.08e-09	1.87e-11	-52.2175	17.217	-3.39691	KRT12	keratin 12	0.0949356
axo09045-f_at	1.49e-07	2.95e-09	-27.7047	12.0264	-3.36685	PHLDA2	pleckstrin homology-like domain family A member 2	0.0969344
axo20503-f_at	6.42e-09	1.57e-11	-53.3877	17.3868	-3.35297	CLDN3	claudin 3	0.0978716
axo10609-f_at	4.02e-08	2.86e-10	-37.1215	14.4861	-3.31632	DNASE1L3	deoxyribonuclease I-like 3 precursor	0.100389
axo00472-f_at	1.7e-06	1.13e-07	-17.4735	8.06133	-3.27847	S100Z	S100 calcium binding protein Z	0.103058
axo16299-f_at	1.37e-08	5.45e-11	-45.6818	16.1705	-3.26924	RHBDL2	rhomboid-related protein 2	0.10372
axo07465-f_at	3.26e-09	6.01e-12	-60.1707	18.2835	-3.24058	AQP4	aquaporin 4 isoform a	0.1058
axo10775-r_at	1.69e-08	7.25e-11	-44.0874	15.8868	-3.23799	ISG15	ISG15 ubiquitin-like modifier	0.105991
axo10986-f_at	9.23e-09	2.92e-11	-49.3932	16.7861	-3.21053	HCLS1	hematopoietic cell-specific Lyn substrate 1	0.108027
axo08183-f_at	2.67e-07	7.55e-09	-24.6146	11.0148	-3.1352	MMP8	matrix metalloproteinase 8 preproprotein	0.113818
axo07260-f_at	5.42e-09	1.27e-11	-54.8115	17.5871	-3.13378	EREG	epiregulin preproprotein	0.11393
axo06014-r_at	2.39e-09	3.51e-12	-64.3475	18.7702	-3.09323	KRT17	keratin 17	0.117178
axo09429-f_at	9.48e-08	1.44e-09	-30.3255	12.794	-3.07446	OASL	2'-5'-oligoadenylate synthetase-like isoform a	0.118712
axo07246-f_at	2.67e-08	1.36e-10	-40.7552	15.252	-3.06984	EMP1	epithelial membrane protein 1	0.119093
axo11000-f_at	1.37e-06	8.49e-08	-18.1202	8.37494	-3.03977	HSPA5	heat shock 70kDa protein 5	0.121602
axo19323-f_at	4.77e-09	1.02e-11	-56.3171	17.7916	-3.00925	C6orf27	G7c protein	0.124201
axo08686-r_at	7.26e-09	1.95e-11	-51.9353	17.1753	-2.96499	RGS2	regulator of G-protein signaling 2, 24kDa	0.128071
axo06364-f_at	1.27e-07	2.32e-09	-28.5492	12.282	-2.9606	ALOX15B	arachidonate 15-lipoxygenase, second type isoform d	0.12846
axo08727-f_at	8.83e-09	2.73e-11	-49.8162	16.8526	-2.92901	MAPK12	mitogen-activated protein kinase 12	0.131305
axo03422-f_at	1.09e-08	3.69e-11	-47.9664	16.5565	-2.92315	LEP	leptin precursor	0.131839
axo10796-r_at	4.46e-08	3.61e-10	-36.0664	14.2474	-2.90018	GFPT2	glutamine-fructose-6-phosphate transaminase 2	0.133955
axo05449-f_at	6.79e-09	1.76e-11	-52.6188	17.2758	-2.88279	NCOA7	nuclear receptor coactivator 7 isoform 2	0.135579
axo00990-r_at	7.27e-09	1.99e-11	-51.8099	17.1566	-2.86106	CAPN13	calpain 13	0.137637
axo10575-f_at	8.07e-08	9.69e-10	-31.8637	13.2116	-2.82303	AQP3	aquaporin 3	0.141314
axo07098-f_at	3.52e-08	2.21e-10	-38.3427	14.7529	-2.81922	CLDN4	claudin 4	0.141687
axo07206-r_at	1.97e-08	9.04e-11	-42.8831	15.6642	-2.76877	IL1B	interleukin 1, beta proprotein	0.146729
axo10822-f_at	4.46e-08	3.53e-10	-36.1579	14.2684	-2.72585	FGFBP1	fibroblast growth factor binding protein 1	0.15116
axo19554-f_at	1.34e-06	8.18e-08	-18.2045	8.41502	-2.70326	EPPK1	epiplakin 1	0.153545
axo07306-r_at	6.17e-08	5.99e-10	-33.8437	13.7176	-2.68366	IL8	interleukin 8 precursor	0.155646
axo16391-f_at	1.09e-08	3.67e-11	-47.9915	16.5606	-2.67852	HERC6	hect domain and RLD 6	0.156201
axo08150-f_at	2.14e-08	9.91e-11	-42.3944	15.5717	-2.6524	MATN3	matrilin 3 precursor	0.159056
axo18501-f_at	2.93e-08	1.56e-10	-40.0547	15.1107	-2.62398	SMYD3	SET and MYND domain containing 3	0.16222
axo07521-r_at	2.67e-07	7.53e-09	-24.6245	11.0183	-2.62188	BCL6	B-cell lymphoma 6 protein isoform 1	0.162456
axo10052-f_at	1.28e-07	2.38e-09	-28.4644	12.2567	-2.62038	DUSP5	dual specificity phosphatase 5	0.162625
axo11516-f_at	7.03e-07	3.27e-08	-20.4567	9.42184	-2.6101	MCM7	minichromosome maintenance complex component 7 isoform 1	0.163787
axo11787-f_at	1.71e-08	7.39e-11	-43.9758	15.8665	-2.60233	NNMT	nicotinamide N-methyltransferase	0.164672
axo17093-f_at	1.18e-07	2.07e-09	-28.9609	12.4037	-2.59579	ERRFI1	mitogen-inducible gene 6 protein	0.165421
axo08144-f_at	4.22e-08	3.13e-10	-36.7122	14.3945	-2.57644	MAS1	MAS1 oncogene	0.167654
axo07205-f_at	4.02e-08	2.85e-10	-37.1395	14.4901	-2.57387	IL1B	interleukin 1, beta proprotein	0.167954
axo18055-f_at	3.52e-08	2.14e-10	-38.508	14.7882	-2.57289	GRHL3	sister-of-mammalian grainyhead protein isoform 1	0.168067
axo20227-f_at	2.9e-07	8.61e-09	-24.2118	10.8732	-2.46683	SYTL2	synaptotagmin-like 2 isoform a	0.180888
axo18410-f_at	2.48e-07	6.55e-09	-25.0596	11.1685	-2.46256	HIF3A	hypoxia inducible factor 3, alpha subunit isoform b	0.181425
axo13134-r_at	2.16e-07	5.23e-09	-25.7806	11.4115	-2.45405	MMD	monocyte to macrophage differentiation-associated precursor	0.182498
axo08844-f_at	2.93e-08	1.58e-10	-40.001	15.0998	-2.40621	UAP1	UDP-N-acteylglucosamine pyrophosphorylase 1	0.18865
axo00180-f_at	4.22e-08	3.12e-10	-36.7212	14.3965	-2.38787	HK2	hexokinase 2	0.191065
axo00254-f_at	4.21e-08	3.05e-10	-36.8296	14.4209	-2.38675	VIT	vitrin	0.191213
axo01995-f_at	1.59e-07	3.31e-09	-27.308	11.9034	-2.37719	NOXO1	NADPH oxidase organizer 1 isoform b	0.192484
axo08764-f_at	3.7e-08	2.38e-10	-38	14.679	-2.36469	DHFR	dihydrofolate reductase	0.194159
axo19293-f_at	7.13e-08	7.62e-10	-32.839	13.4651	-2.35275	ITPKC	inositol 1,4,5-trisphosphate 3-kinase C	0.195772
axo02200-r_at	4.27e-07	1.52e-08	-22.5332	10.2553	-2.35126	HARBI1	harbinger transposase derived 1	0.195975
axo09084-f_at	1.14e-08	3.91e-11	-47.619	16.4992	-2.34234	UGDH	UDP-glucose dehydrogenase	0.19719
axo09995-f_at	4.82e-07	1.8e-08	-22.0566	10.0711	-2.34172	CDH1	cadherin 1, type 1 preproprotein	0.197276
axo10817-f_at	2.98e-07	8.93e-09	-24.0998	10.8334	-2.32967	CLEC2B	C-type lectin, superfamily member 2	0.198929
axo11646-f_at	8.41e-08	1.13e-09	-31.2397	13.045	-2.32744	LIPG	endothelial lipase precursor	0.199237
axo09989-f_at	7.25e-08	7.87e-10	-32.7048	13.4307	-2.32661	CDH1	cadherin 1, type 1 preproprotein	0.199352
axo08550-f_at	3.32e-07	1.04e-08	-23.6329	10.6653	-2.3115	PTBP1	polypyrimidine tract-binding protein 1 isoform a	0.201451
axo03481-f_at	3.66e-07	1.23e-08	-23.1447	10.4857	-2.3099	ARL9	ADP-ribosylation factor-like 9	0.201675
axo08986-f_at	3.24e-08	1.84e-10	-39.2348	14.9416	-2.29242	TK1	thymidine kinase 1	0.204133
axo08744-f_at	2.15e-07	5.21e-09	-25.7931	11.4157	-2.28473	SDC4	syndecan 4 precursor	0.205224
axo07813-f_at	1.09e-05	1.31e-06	-12.7501	5.35618	-2.28012	FCN1	ficolin 1 precursor	0.205881
axo13132-r_at	1.32e-08	5.1e-11	-46.0644	16.2368	-2.2556	DNAJB9	DnaJ (Hsp40) homolog, subfamily B, member 9	0.20941
axo19448-f_at	1.35e-08	5.32e-11	-45.8219	16.1948	-2.25315	COL21A1	collagen, type XXI, alpha 1 precursor	0.209766
axo15317-f_at	1.57e-08	6.48e-11	-44.7046	15.9981	-2.24881	UMOD	uromodulin precursor	0.210397
axo19588-f_at	2.31e-07	5.81e-09	-25.4413	11.2981	-2.23541	RTP3	transmembrane protein 7	0.21236
axo15793-f_at	2.32e-06	1.71e-07	-16.5726	7.60483	-2.22978	PLEK2	pleckstrin 2	0.213192
axo09994-f_at	1.86e-07	4.07e-09	-26.6086	11.6819	-2.2288	CDH1	cadherin 1, type 1 preproprotein	0.213335
axo20694-f_at	8.3e-08	1.04e-09	-31.5959	13.1406	-2.21459	UMOD	uromodulin precursor	0.215448
axo10237-r_at	3.3e-07	1.03e-08	-23.6712	10.6792	-2.20177	PSPH	phosphoserine phosphatase	0.217371
axo07445-f_at	2.94e-08	1.6e-10	-39.9345	15.0862	-2.201	ALCAM	activated leukocyte cell adhesion molecule	0.217487
axo01573-f_at	4.26e-08	3.18e-10	-36.6371	14.3775	-2.19968	TTC39B	tetratricopeptide repeat domain 39B	0.217686
axo18502-r_at	8.12e-07	4.01e-08	-19.9312	9.19725	-2.19678	SMYD3	SET and MYND domain containing 3	0.218123
axo19121-f_at	4.39e-08	3.41e-10	-36.3146	14.3043	-2.19226	ESRP2	RNA binding motif protein 35B	0.218808
axo11157-f_at	8.83e-08	1.24e-09	-30.8924	12.9506	-2.18382	HSPA1L	heat shock 70kDa protein 1-like	0.220093
axo10238-r_at	1.36e-07	2.6e-09	-28.1543	12.1635	-2.18187	PSPH	phosphoserine phosphatase	0.22039
axo09194-f_at	3.52e-08	2.1e-10	-38.5984	14.8075	-2.17668	HMGA2	high mobility group AT-hook 2 isoform a	0.221184
axo19929-f_at	3.66e-07	1.23e-08	-23.148	10.487	-2.16844	C2orf40	esophageal cancer related gene 4 protein	0.222451
axo13198-f_at	2.82e-08	1.45e-10	-40.4265	15.1861	-2.16444	IFIT5	interferon-induced protein with tetratricopeptide repeats 5	0.223068
axo07724-f_at	9.77e-08	1.51e-09	-30.143	12.743	-2.14246	CFD	complement factor D preproprotein	0.226493
axo06005-r_at	3.53e-07	1.16e-08	-23.3247	10.5524	-2.13352	PLCXD2	phosphatidylinositol-specific phospholipase C, X domain containing 2 isoform a	0.227901
axo07016-f_at	8.07e-08	9.59e-10	-31.906	13.2228	-2.12858	TYRP1	tyrosinase-related protein 1 precursor	0.228683
axo20159-f_at	1.46e-07	2.88e-09	-27.7954	12.0543	-2.12772	C13orf33	hypothetical protein LOC84935	0.228819
axo01498-f_at	7.54e-08	8.55e-10	-32.368	13.3438	-2.12398	GRPEL2	GrpE-like 2, mitochondrial	0.229412
axo02517-f_at	8.01e-07	3.94e-08	-19.9757	9.21652	-2.121	TMEM52	transmembrane protein 52	0.229887
axo17913-r_at	2.89e-08	1.51e-10	-40.2222	15.1448	-2.11771	KIAA1618	hypothetical protein LOC57714	0.230413
axo09980-f_at	3.18e-07	9.78e-09	-23.8236	10.7344	-2.1115	CAMP	cathelicidin antimicrobial peptide	0.231406
axo21521-f_at	6.37e-08	6.39e-10	-33.5716	13.65	-2.10595	GNPNAT1	glucosamine-phosphate N-acetyltransferase 1	0.232298
axo17960-f_at	3.82e-08	2.52e-10	-37.7215	14.6184	-2.10544	UBC	ubiquitin C	0.23238
axo16109-f_at	6.5e-07	2.87e-08	-20.7973	9.56432	-2.10323	FAM46A	hypothetical protein LOC55603	0.232736
axo03003-f_at	7.1e-07	3.31e-08	-20.4233	9.40774	-2.09549	RNASE1	pancreatic ribonuclease precursor	0.233989
axo10749-f_at	2.18e-07	5.37e-09	-25.6921	11.3821	-2.09349	PLA2G7	phospholipase A2, group VII	0.234314
axo02180-f_at	1.5e-06	9.53e-08	-17.8554	8.24789	-2.08975	WARS	tryptophanyl-tRNA synthetase isoform a	0.234922
axo12982-f_at	2.14e-07	5.14e-09	-25.8352	11.4296	-2.08756	LPAR3	lysophosphatidic acid receptor 3	0.235279
axo12645-r_at	1.23e-06	7.19e-08	-18.507	8.55727	-2.08207	ESM1	endothelial cell-specific molecule 1 isoform a precursor	0.236176
axo05883-r_at	1.09e-06	6.07e-08	-18.9087	8.74266	-2.07829	ELOVL6	elongation of very long chain fatty acids-like 6	0.236794
axo13200-f_at	1.86e-07	4.07e-09	-26.6039	11.6804	-2.07788	IFIT5	interferon-induced protein with tetratricopeptide repeats 5	0.236862
axo08760-f_at	3.25e-08	1.86e-10	-39.1745	14.929	-2.07367	SFRS2	splicing factor, arginine/serine-rich 2	0.237554
axo09755-f_at	4.19e-08	3.01e-10	-36.8956	14.4357	-2.0712	DDIT3	DNA-damage-inducible transcript 3	0.237962
axo07788-f_at	7.13e-08	7.63e-10	-32.8313	13.4631	-2.06773	F3	coagulation factor III precursor	0.238534
axo11277-f_at	4.88e-08	4.3e-10	-35.2807	14.0645	-2.06587	PSCA	prostate stem cell antigen preproprotein	0.238842
axo13133-f_at	8.07e-08	9.57e-10	-31.9125	13.2245	-2.03378	MMD	monocyte to macrophage differentiation-associated precursor	0.244214
axo11351-f_at	1.14e-07	1.96e-09	-29.1601	12.4619	-2.03241	CLEC3A	C-type lectin domain family 3 member A	0.244447
axo13845-f_at	3.39e-07	1.08e-08	-23.5147	10.6222	-2.03029	GRHL1	leader-binding protein 32 isoform 1	0.244806
axo10910-f_s_at	2.32e-07	5.86e-09	-25.4121	11.2882	-2.02656	ETS2	v-ets erythroblastosis virus E26 oncogene homolog 2	0.24544
axo12244-f_at	4.02e-08	2.87e-10	-37.1184	14.4854	-2.02533	HSPA8	heat shock 70kDa protein 8 isoform 1	0.245649
axo00408-f_at	1.12e-07	1.9e-09	-29.2746	12.4952	-2.02161	TREX2	three prime repair exonuclease 2	0.246284
axo05645-r_at	3.41e-08	2e-10	-38.817	14.8539	-2.01066	MMP2	matrix metalloproteinase 2 isoform b	0.24816
axo20225-f_at	6.35e-08	6.29e-10	-33.6394	13.6669	-2.00372	SYTL2	synaptotagmin-like 2 isoform a	0.249356
axo11240-f_at	2.59e-07	7.13e-09	-24.7924	11.0766	-1.99659	SFRS4	splicing factor, arginine/serine-rich 4	0.250592
axo13626-f_at	1.09e-07	1.85e-09	-29.3759	12.5245	-1.98453	EXOSC2	exosome component 2	0.252695
axo00296-f_at	3.74e-07	1.26e-08	-23.0701	10.458	-1.98444	ANTXR2	anthrax toxin receptor 2 isoform 1	0.252712
axo08965-f_at	4.93e-08	4.43e-10	-35.1523	14.0341	-1.98123	TGM3	transglutaminase 3 precursor	0.253273
axo03358-f_at	1.94e-07	4.4e-09	-26.3471	11.5975	-1.96972	TJP2	tight junction protein 2 (zona occludens 2) isoform 2	0.255303
axo08186-f_at	7.9e-07	3.81e-08	-20.0593	9.25255	-1.96208	MMP13	matrix metalloproteinase 13 preproprotein	0.256658
axo03686-f_at	4.66e-08	3.9e-10	-35.714	14.1659	-1.95846		PREDICTED: hypothetical protein	0.257304
axo10221-f_at	4.37e-06	3.97e-07	-14.8725	6.6733	-1.95201	YBX1	nuclease sensitive element binding protein 1	0.258456
axo00377-f_at	3.84e-06	3.36e-07	-15.1996	6.86027	-1.94959	COL11A1	alpha 1 type XI collagen isoform B preproprotein	0.25889
axo06031-f_at	3.52e-08	2.12e-10	-38.5359	14.7942	-1.93396	KRT5	keratin 5	0.26171
axo14052-r_at	4.3e-08	3.23e-10	-36.5632	14.3608	-1.9304	KIAA0247	hypothetical protein LOC9766	0.262357
axo20131-f_at	3.16e-05	5.05e-06	-10.6792	3.85909	-1.92621	SH3KBP1	SH3-domain kinase binding protein 1 isoform b	0.26312
axo15284-f_at	6.1e-08	5.9e-10	-33.9105	13.7341	-1.92044	FCN2	ficolin 2 isoform b precursor	0.264175
axo00161-f_at	8.95e-08	1.28e-09	-30.779	12.9195	-1.91793	MAL2	MAL2 proteolipid protein	0.264634
axo15223-f_at	3.16e-06	2.61e-07	-15.6989	7.13827	-1.91646	ARRDC2	arrestin domain containing 2 isoform 1	0.264904
axo06109-r_at	2.35e-06	1.74e-07	-16.5335	7.58445	-1.91594	RTL1	retrotransposon-like 1	0.265
axo13199-f_at	8.74e-08	1.22e-09	-30.9466	12.9654	-1.91573	IFIT5	interferon-induced protein with tetratricopeptide repeats 5	0.265038
axo02144-f_at	5.88e-08	5.53e-10	-34.1818	13.8006	-1.91565		immunoglobulin superfamily, member 22	0.265053
axo03236-f_at	5.38e-07	2.11e-08	-21.6142	9.89655	-1.91375	COL28A1	collagen, type XXVIII precursor	0.265402
axo03823-f_at	0.00962	0.00427	-3.93975	-3.54127	-1.91268		PREDICTED: similar to hCG2011544	0.265599
axo07497-f_at	2.45e-06	1.84e-07	-16.4219	7.52606	-1.90982	ATP2A2	ATPase, Ca++ transporting, slow twitch 2 isoform 2	0.266126
axo17097-r_at	2.54e-07	6.92e-09	-24.8866	11.1091	-1.90882	UBB	ubiquitin B precursor	0.266309
axo04988-f_at	6.75e-07	3.06e-08	-20.6287	9.49409	-1.90575	RBM47	RNA binding motif protein 47 isoform a	0.266877
axo21228-f_at	3.85e-08	2.57e-10	-37.6255	14.5974	-1.90536	NFKBIA	nuclear factor of kappa light polypeptide gene enhancer in B-cells inhibitor, alpha	0.26695
axo10912-f_at	4.02e-08	2.79e-10	-37.2465	14.5139	-1.90493	F2RL1	coagulation factor II (thrombin) receptor-like 1 precursor	0.26703
axo04187-r_at	4.83e-08	4.21e-10	-35.3764	14.087	-1.90466	FAM3C	family with sequence similarity 3, member C precursor	0.26708
axo17518-f_at	4.16e-07	1.46e-08	-22.6422	10.2968	-1.9032	GPR84	G protein-coupled receptor 84	0.267349
axo06142-f_at	1.48e-06	9.4e-08	-17.8848	8.26209	-1.8953	MUC15	mucin 15 isoform a	0.268817
axo06252-f_at	7.8e-08	8.93e-10	-32.1915	13.2978	-1.89103	FDPS	farnesyl diphosphate synthase isoform b	0.269615
axo11800-f_at	2.49e-07	6.71e-09	-24.9839	11.1426	-1.88944	OAS3	2'-5'oligoadenylate synthetase 3	0.269912
axo09600-f_at	4.09e-06	3.65e-07	-15.035	6.76668	-1.88775	FCGBP	Fc fragment of IgG binding protein	0.270229
axo17028-f_at	8.41e-08	1.15e-09	-31.1791	13.0286	-1.87877	CMAS	cytidine 5'-monophosphate N-acetylneuraminic acid synthetase	0.271916
axo11505-f_at	1.08e-07	1.78e-09	-29.5206	12.5662	-1.87818	MAT2A	methionine adenosyltransferase II, alpha	0.272027
axo10156-f_at	4.39e-08	3.4e-10	-36.3362	14.3092	-1.87145	ILF2	interleukin enhancer binding factor 2	0.273298
axo21176-f_at	1.28e-05	1.62e-06	-12.3997	5.11924	-1.87064	ASF1B	anti-silencing function 1B	0.273453
axo07530-f_at	5.41e-07	2.14e-08	-21.584	9.88451	-1.86678	BNC1	basonuclin 1	0.274185
axo05214-f_at	7.54e-08	8.45e-10	-32.4151	13.356	-1.8647	ELOVL7	elongation of very long chain fatty acids-like 7	0.27458
axo06251-f_at	5.26e-08	4.82e-10	-34.7823	13.946	-1.85921	FDPS	farnesyl diphosphate synthase isoform b	0.275628
axo05416-f_at	3.47e-07	1.13e-08	-23.3961	10.5787	-1.85832	TP63	tumor protein p63 isoform 4	0.275797
axo12159-f_at	6.49e-08	6.66e-10	-33.3998	13.6071	-1.85685	SLC2A1	solute carrier family 2 (facilitated glucose transporter), member 1	0.276078
axo07978-r_at	6.35e-08	6.29e-10	-33.6352	13.6659	-1.85242	IRF1	interferon regulatory factor 1	0.276927
axo13166-f_at	8.07e-08	9.62e-10	-31.8933	13.2195	-1.84613	PADI4	peptidyl arginine deiminase, type IV	0.278138
axo04425-f_at	3.94e-08	2.65e-10	-37.4892	14.5675	-1.84265	SLC7A3	solute carrier family 7 (cationic amino acid transporter, y+ system), member 3	0.27881
axo10898-f_at	1.14e-07	1.99e-09	-29.1024	12.4451	-1.83904	EPHA1	ephrin receptor EphA1	0.279508
axo02706-f_at	8.95e-08	1.3e-09	-30.7181	12.9028	-1.8308	FAM55B	hypothetical protein LOC120406	0.281108
axo09771-r_at	7.18e-08	7.72e-10	-32.7849	13.4512	-1.83064	F2RL2	coagulation factor II (thrombin) receptor-like 2 precursor	0.281139
axo17304-f_at	6.44e-08	6.55e-10	-33.4649	13.6234	-1.82705	ABCB9	ATP-binding cassette, sub-family B (MDR/TAP), member 9 isoform 2	0.28184
axo10224-f_at	9.29e-08	1.38e-09	-30.4867	12.8389	-1.82592	PCK2	mitochondrial phosphoenolpyruvate carboxykinase 2 isoform 1 precursor	0.282061
axo05780-f_at	1.02e-07	1.64e-09	-29.8268	12.6537	-1.82117	FAM115C	hypothetical protein LOC285966 A	0.282992
axo03692-f_at	1.46e-07	2.86e-09	-27.8147	12.0602	-1.81987	LOC730474	PREDICTED: hypothetical protein, partial	0.283246
axo15104-f_at	1.51e-07	3.05e-09	-27.5909	11.9913	-1.81984	MOXD1	monooxygenase, DBH-like 1 isoform 2	0.283253
axo05380-f_at	8.14e-08	9.95e-10	-31.7557	13.1831	-1.81265	TTC22	tetratricopeptide repeat domain 22 isoform 1	0.284668
axo19403-f_at	4.47e-06	4.09e-07	-14.8161	6.64068	-1.81209	SLC25A32	solute carrier family 25, member 32	0.284778
axo00013-f_at	6.57e-07	2.92e-08	-20.7518	9.54544	-1.81089	CASP1	caspase 1 isoform gamma precursor	0.285014
axo05399-f_at	9.51e-07	5.01e-08	-19.3757	8.95327	-1.79921	ELF3	E74-like factor 3 (ets domain transcription factor, epithelial-specific )	0.287331
axo05362-f_at	6.57e-08	6.89e-10	-33.255	13.5707	-1.79476	TGM1	transglutaminase 1	0.28822
axo15313-f_at	1.46e-06	9.22e-08	-17.9287	8.28326	-1.7946	UMOD	uromodulin precursor	0.288252
axo18772-f_at	2.58e-06	1.97e-07	-16.2698	7.44589	-1.78791	DSC3	desmocollin 3 isoform Dsc3b preproprotein	0.289591
axo20007-f_at	6.33e-07	2.7e-08	-20.9588	9.63106	-1.7839	NT5C1A	5'-nucleotidase, cytosolic IA	0.290398
axo16703-f_at	1.07e-06	5.92e-08	-18.9686	8.76995	-1.78327	LRRC1	leucine rich repeat containing 1	0.290525
axo08309-f_at	8.13e-08	9.88e-10	-31.7854	13.1909	-1.77817	ODC1	ornithine decarboxylase 1	0.291552
axo06111-r_at	3.33e-06	2.79e-07	-15.5676	7.06601	-1.77395	RTL1	retrotransposon-like 1	0.292406
axo01201-f_at	1.18e-07	2.09e-09	-28.9246	12.3931	-1.76969	MAP2K3	mitogen-activated protein kinase kinase 3 isoform B	0.293272
axo17501-f_at	1.78e-07	3.83e-09	-26.8116	11.7469	-1.76784	ANKRD2	ankyrin repeat domain 2 isoform a	0.293649
axo19400-f_at	1.14e-07	1.99e-09	-29.1081	12.4468	-1.76498		Z-DNA binding protein 1	0.294231
axo08184-f_at	2.41e-05	3.62e-06	-11.1576	4.22679	-1.7613	MMP10	matrix metalloproteinase 10 preproprotein	0.294982
axo15888-f_at	9.21e-07	4.78e-08	-19.4904	9.00423	-1.76038	GCNT4	core 2 beta-1,6-N-acetylglucosaminyltransferase 3	0.29517
axo08979-f_at	4.9e-08	4.37e-10	-35.2133	14.0485	-1.75788	TIMP1	tissue inhibitor of metalloproteinase 1 precursor	0.295683
axo10675-r_at	1.27e-07	2.32e-09	-28.5509	12.2825	-1.75192	NME4	nucleoside-diphosphate kinase 4	0.296907
axo19585-f_at	5.45e-07	2.17e-08	-21.5427	9.86798	-1.75118	RTP3	transmembrane protein 7	0.297058
axo00809-f_at	8.41e-08	1.09e-09	-31.3921	13.086	-1.75048	PPP1R14B	protein phosphatase 1 regulatory subunit 14B	0.297203
axo08122-f_s_at	8.69e-08	1.21e-09	-30.984	12.9756	-1.74781	EPCAM	epithelial cell adhesion molecule precursor	0.297754
axo18504-f_at	1.18e-06	6.77e-08	-18.648	8.62282	-1.74752	SMYD3	SET and MYND domain containing 3	0.297813
axo10867-r_at	1.94e-07	4.45e-09	-26.3098	11.5854	-1.7395	CAPN1	calpain 1, large subunit	0.299474
axo02782-f_at	1.03e-07	1.67e-09	-29.7648	12.636	-1.73949	MACC1	putative binding protein 7a5	0.299476
axo05927-r_at	0.000104	2.19e-05	-8.77233	2.2345	-1.73686	HYOU1	hypoxia up-regulated 1 precursor	0.300022
axo12288-f_at	3.06e-07	9.27e-09	-23.9874	10.7932	-1.7331	STARD10	START domain containing 10	0.300805
axo15550-f_at	5.4e-07	2.13e-08	-21.596	9.88929	-1.73261	RAB10	ras-related GTP-binding protein RAB10	0.300906
axo00841-r_at	8.07e-08	9.63e-10	-31.8886	13.2182	-1.73155	TMEM45B	transmembrane protein 45B	0.301128
axo14441-f_at	2.7e-05	4.17e-06	-10.9543	4.07226	-1.73094	WAPAL	wings apart-like homolog	0.301255
axo07719-f_at	1.08e-07	1.79e-09	-29.509	12.5628	-1.72716	GADD45A	growth arrest and DNA-damage-inducible, alpha	0.302046
axo07745-f_at	1.11e-06	6.21e-08	-18.8533	8.71735	-1.72648	E2F3	E2F transcription factor 3	0.302188
axo11082-f_at	8.95e-08	1.29e-09	-30.7289	12.9058	-1.72599	MALL	mal, T-cell differentiation protein-like	0.30229
axo00701-r_at	1.57e-07	3.25e-09	-27.3755	11.9245	-1.72511	RRM2	ribonucleotide reductase M2 polypeptide	0.302476
axo03281-f_at	1.14e-05	1.38e-06	-12.6563	5.29333	-1.72462	PRC1	protein regulator of cytokinesis 1 isoform 3	0.302578
axo13318-f_at	9.84e-08	1.54e-09	-30.0671	12.7216	-1.72391	UHRF1	ubiquitin-like with PHD and ring finger domains 1 isoform 2	0.302728
axo08136-f_at	4.98e-08	4.51e-10	-35.068	14.0141	-1.72311	MAL	T-lymphocyte maturation-associated protein isoform a	0.302895
axo07820-f_at	8.48e-06	9.47e-07	-13.2956	5.71337	-1.72268	FOXO1	forkhead box O1	0.302986
axo19325-f_at	3.65e-06	3.12e-07	-15.3396	6.93909	-1.72142	C6orf27	G7c protein	0.303251
axo04606-f_at	5.69e-05	1.05e-05	-9.69022	3.05057	-1.71862	ITGA6	integrin alpha chain, alpha 6 isoform a precursor	0.30384
axo02805-f_at	2.28e-05	3.38e-06	-11.2614	4.30474	-1.71466	SYNE2	spectrin repeat containing, nuclear envelope 2 isoform 5	0.304674
axo10320-f_at	1.33e-06	8.05e-08	-18.2411	8.43236	-1.71336	RAB11A	Ras-related protein Rab-11A	0.30495
axo12644-f_at	2.26e-06	1.66e-07	-16.6377	7.63859	-1.70752	KERA	keratocan	0.306186
axo09921-f_at	1.35e-07	2.56e-09	-28.2004	12.1775	-1.7049	CARTPT	cocaine- and amphetamine-regulated transcript	0.306741
axo06899-f_at	3e-06	2.42e-07	-15.8464	7.21879	-1.7033	PIP4K2C	phosphatidylinositol-5-phosphate 4-kinase, type II, gamma isoform a	0.307084
axo05801-f_at	1.57e-07	3.21e-09	-27.4113	11.9357	-1.69899	MOV10	Mov10, Moloney leukemia virus 10, homolog	0.308002
axo00369-f_at	4.1e-06	3.66e-07	-15.0329	6.76549	-1.698	WFDC3	WAP four-disulfide core domain 3 precursor	0.308212
axo01625-f_at	4.43e-06	4.05e-07	-14.8364	6.65245	-1.69162	TMEM154	transmembrane protein 154	0.30958
axo05697-f_at	3.95e-07	1.36e-08	-22.8487	10.375	-1.68508	C13orf31	hypothetical protein LOC144811	0.310985
axo08845-f_at	1.13e-07	1.94e-09	-29.1953	12.4722	-1.68207	UAP1	UDP-N-acteylglucosamine pyrophosphorylase 1	0.311636
axo10319-f_at	8.3e-08	1.02e-09	-31.645	13.1536	-1.68122	RAB11A	Ras-related protein Rab-11A	0.311819
axo12896-f_at	2.8e-07	8.13e-09	-24.3868	10.935	-1.67667	LAMB4	laminin, beta 4	0.312803
axo18652-f_at	1.37e-06	8.48e-08	-18.1208	8.37527	-1.67437	GPR87	G protein-coupled receptor 87	0.313302
axo10354-f_at	3.1e-07	9.41e-09	-23.9402	10.7763	-1.66594	SLC16A6	solute carrier family 16, member 6	0.315139
axo08259-f_s_at	1.41e-06	8.77e-08	-18.0443	8.33875	-1.66566	NASP	nuclear autoantigenic sperm protein isoform 2	0.3152
axo10223-f_at	2.48e-07	6.57e-09	-25.0478	11.1645	-1.66501	PCK2	mitochondrial phosphoenolpyruvate carboxykinase 2 isoform 1 precursor	0.315342
axo00173-f_at	1.7e-07	3.6e-09	-27.016	11.8117	-1.66433	PLEKHG4B	pleckstrin homology domain containing, family G (with RhoGef domain) member 4B	0.31549
axo01343-f_at	6.34e-05	1.19e-05	-9.52289	2.9068	-1.65958	SGMS1	sphingomyelin synthase 1	0.316532
axo16183-f_at	0.000104	2.2e-05	-8.76592	2.22857	-1.6542	BSPRY	B-box and SPRY domain containing	0.317713
axo11422-r_at	7.44e-08	8.19e-10	-32.5407	13.3885	-1.64589	GPA33	transmembrane glycoprotein A33 precursor	0.31955
axo18087-r_at	1.29e-07	2.4e-09	-28.4325	12.2472	-1.64004	MYL7	myosin light chain 2a	0.320847
axo18086-f_at	3.4e-07	1.09e-08	-23.5036	10.6181	-1.63919	OVOL2	zinc finger protein 339	0.321037
axo05926-f_at	1.27e-07	2.34e-09	-28.52	12.2733	-1.63571	HYOU1	hypoxia up-regulated 1 precursor	0.321812
axo07927-f_at	2.06e-07	4.83e-09	-26.0419	11.4979	-1.63542	HMGCS1	hydroxymethylglutaryl-CoA synthase 1	0.321877
axo11504-r_at	8.69e-08	1.21e-09	-30.9798	12.9745	-1.63515	MAT2A	methionine adenosyltransferase II, alpha	0.321936
axo12394-f_at	6.75e-07	3.07e-08	-20.6153	9.48851	-1.63435	IFRD2	interferon-related developmental regulator 2	0.322115
axo12956-f_at	1.76e-07	3.79e-09	-26.8466	11.758	-1.63137	STAP1	signal transducing adaptor family member 1	0.322781
axo18755-f_at	9.77e-08	1.5e-09	-30.1526	12.7457	-1.62762	EFHD2	EF-hand domain family, member D2	0.323622
axo05844-r_at	4.87e-07	1.83e-08	-22.0104	10.0531	-1.62691	SSFA2	sperm specific antigen 2 isoform 1	0.32378
axo19556-f_at	2.69e-07	7.61e-09	-24.5907	11.0065	-1.62617	EPPK1	epiplakin 1	0.323947
axo10356-f_at	2.2e-07	5.46e-09	-25.642	11.3654	-1.62531	SLC16A6	solute carrier family 16, member 6	0.32414
axo17115-f_at	1.93e-07	4.37e-09	-26.37	11.6049	-1.62265	SLC38A2	solute carrier family 38, member 2	0.324739
axo16074-f_at	1.1e-06	6.13e-08	-18.8844	8.73158	-1.62247	DIRAS2	Di-Ras2	0.324778
axo18737-f_at	3.88e-07	1.33e-08	-22.9238	10.4032	-1.61992	GDPD3	glycerophosphodiester phosphodiesterase domain containing 3	0.325354
axo07001-f_at	2.59e-06	1.98e-07	-16.2605	7.44099	-1.61602	BMP2	bone morphogenetic protein 2 preproprotein	0.326234
axo19553-f_at	2.71e-07	7.71e-09	-24.5505	10.9924	-1.61497	EPPK1	epiplakin 1	0.326473
axo08156-r_at	1.31e-06	7.88e-08	-18.2932	8.45697	-1.61214	MDM2	mouse double minute 2 homolog isoform MDM2	0.327113
axo12254-f_at	2.67e-07	7.49e-09	-24.6401	11.0237	-1.61194	RBBP9	retinoblastoma binding protein 9	0.327158
axo20242-f_at	6e-07	2.52e-08	-21.1441	9.70698	-1.6106	SEC23B	Sec23 homolog B	0.327462
axo06314-f_at	2.2e-05	3.23e-06	-11.3263	4.35313	-1.60723	FZR1	Fzr1 protein isoform 1	0.328227
axo16808-f_at	1.51e-06	9.69e-08	-17.8161	8.22888	-1.6027	PI4K2B	phosphatidylinositol 4-kinase type 2 beta	0.32926
axo11392-f_at	2.79e-07	8.09e-09	-24.403	10.9407	-1.60054	TNK2	tyrosine kinase, non-receptor, 2 isoform 1	0.329753
axo18129-f_at	8.01e-07	3.94e-08	-19.9743	9.21589	-1.60019	TRIM39	tripartite motif-containing 39 isoform 1	0.329832
axo12755-f_at	5.73e-07	2.34e-08	-21.3375	9.78546	-1.59699	PKP3	plakophilin 3	0.330565
axo02845-f_at	3.47e-07	1.13e-08	-23.4002	10.5802	-1.59363	RAB27A	Ras-related protein Rab-27A	0.331337
axo06666-r_at	8.41e-08	1.11e-09	-31.3164	13.0657	-1.59041	MX1	myxovirus resistance protein 1	0.332078
axo13251-f_at	3.82e-05	6.38e-06	-10.3519	3.59897	-1.58932	UCK2	uridine-cytidine kinase 2	0.332328
axo08016-f_at	4.4e-07	1.6e-08	-22.3906	10.2006	-1.58809	JUNB	jun B proto-oncogene	0.332612
axo02359-f_at	3.85e-07	1.31e-08	-22.9535	10.4144	-1.58807	FLJ36031	hypothetical protein LOC168455	0.332616
axo12558-f_at	2.77e-07	8.01e-09	-24.4329	10.9513	-1.58536	SFRS5	splicing factor, arginine/serine-rich 5	0.333242
axo09083-r_at	9.77e-08	1.5e-09	-30.1575	12.747	-1.58423	UGCG	ceramide glucosyltransferase	0.333503
axo00774-f_at	3.57e-07	1.18e-08	-23.2631	10.5296	-1.58384	TLCD1	TLC domain containing 1	0.333592
axo16188-f_at	0.000169	3.93e-05	-8.09497	1.58595	-1.5779	MFSD6	major facilitator superfamily domain containing 6	0.334968
axo11174-f_at	1.08e-07	1.78e-09	-29.518	12.5654	-1.57611	NCCRP1	non-specific cytotoxic cell receptor protein 1 homolog	0.335386
axo08502-f_at	2.18e-07	5.33e-09	-25.7176	11.3906	-1.57321	HTRA1	HtrA serine peptidase 1 precursor	0.336059
axo01992-f_at	7.12e-06	7.59e-07	-13.6821	5.95819	-1.57317	CAMK2D	calcium/calmodulin-dependent protein kinase II delta isoform 4	0.336069
axo08789-f_at	6.6e-06	6.88e-07	-13.8569	6.06685	-1.56747	SLC9A2	solute carrier family 9 (sodium/hydrogen exchanger), member 2	0.337399
axo01703-f_at	2.07e-06	1.48e-07	-16.8852	7.7659	-1.56732	SP7	osterix	0.337435
axo10968-f_at	0.000501	0.000142	-6.75312	0.165571	-1.56502	HIST1H1B	histone cluster 1, H1b	0.337973
axo20700-f_at	8e-07	3.92e-08	-19.9858	9.22087	-1.5647	HIST2H2AC	histone cluster 2, H2ac	0.338048
axo08154-f_at	2.42e-06	1.81e-07	-16.4492	7.54039	-1.56256	MCM3	minichromosome maintenance complex component 3	0.338549
axo20707-f_at	0.000147	3.31e-05	-8.28762	1.77471	-1.55905	RRP1	ribosomal RNA processing 1 homolog	0.339375
axo12916-f_at	8.72e-07	4.43e-08	-19.6832	9.08918	-1.55903	ATF5	activating transcription factor 5	0.339379
axo14386-f_at	3.37e-07	1.07e-08	-23.568	10.6416	-1.55445	RPS6KA1	ribosomal protein S6 kinase, 90kDa, polypeptide 1 isoform b	0.340458
axo07545-f_at	1.23e-05	1.52e-06	-12.5003	5.18786	-1.54887	KLF5	Kruppel-like factor 5	0.341778
axo08747-f_at	1.29e-06	7.66e-08	-18.3569	8.48701	-1.54846	DCK	deoxycytidine kinase	0.341876
axo11674-r_at	6.37e-07	2.73e-08	-20.9265	9.61772	-1.5478	MED11	mediator complex subunit 11	0.342032
axo07856-r_at	2.18e-07	5.39e-09	-25.6816	11.3786	-1.54548	GBP1	guanylate binding protein 1, interferon-inducible, 67kDa	0.342581
axo07640-f_at	4.93e-07	1.89e-08	-21.9277	10.0207	-1.54302	COL2A1	collagen, type II, alpha 1 isoform 1 precursor	0.343166
axo12270-f_at	1.11e-06	6.24e-08	-18.8425	8.71237	-1.54103	PLK2	polo-like kinase 2	0.343639
axo08558-f_at	2.78e-06	2.17e-07	-16.0738	7.34149	-1.54081	TWF1	twinfilin 1	0.343692
axo00906-f_at	3.84e-06	3.36e-07	-15.1976	6.85914	-1.53587	CSNK1D	casein kinase 1, delta isoform 2	0.344872
axo09533-r_at	7.19e-05	1.39e-05	-9.32402	2.73311	-1.53409	NAPA	N-ethylmaleimide-sensitive factor attachment protein, alpha	0.345297
axo13661-f_at	9.21e-07	4.8e-08	-19.4806	8.99989	-1.52805	ORC6L	origin recognition complex subunit 6	0.346746
axo02765-f_at	1.02e-06	5.49e-08	-19.1501	8.85215	-1.52801	UPK3B	uroplakin 3B isoform b	0.346754
axo07323-f_at	2.94e-07	8.77e-09	-24.1527	10.8522	-1.52799	B4GALT1	UDP-Gal:betaGlcNAc beta 1,4- galactosyltransferase 1, membrane-bound form	0.346759
axo04516-r_at	1.07e-06	5.96e-08	-18.9531	8.76289	-1.5272	NP	nucleoside phosphorylase	0.34695
axo02494-r_at	9.01e-08	1.31e-09	-30.6683	12.8891	-1.52597	2018-03-03	membrane-associated ring finger (C3HC4) 3	0.347246
axo00286-f_at	1.18e-06	6.82e-08	-18.6303	8.6146	-1.52516	CCNE2	cyclin E2	0.347442
axo19467-f_at	1.45e-06	9.1e-08	-17.9586	8.29765	-1.52497	ACSBG2	bubblegum related protein	0.347486
axo10164-f_at	1.25e-05	1.55e-06	-12.4657	5.1643	-1.52448	KIF11	kinesin family member 11	0.347604
axo10330-f_at	2.77e-06	2.16e-07	-16.0818	7.34576	-1.52235	CLIC3	chloride intracellular channel 3	0.348117
axo08889-f_at	2.13e-05	3.1e-06	-11.3889	4.39954	-1.52126	STAT5A	signal transducer and activator of transcription 5A	0.348383
axo09909-f_at	1.21e-07	2.17e-09	-28.8028	12.3572	-1.51988	EEF1E1	eukaryotic translation elongation factor 1 epsilon 1 isoform 1	0.348715
axo01423-r_at	4.26e-07	1.51e-08	-22.56	10.2655	-1.51341	TARS	threonyl-tRNA synthetase	0.350282
axo02383-f_at	5.36e-06	5.19e-07	-14.3703	6.37849	-1.51212	SULT1C2	sulfotransferase family, cytosolic, 1C, member 1 isoform b	0.350596
axo03429-f_at	5.7e-07	2.32e-08	-21.358	9.79375	-1.51143	KEAP1	kelch-like ECH-associated protein 1	0.350763
axo02001-f_at	2.03e-07	4.72e-09	-26.1151	11.5219	-1.50989	SPAG1	sperm associated antigen 1	0.351138
axo09745-f_at	3.11e-06	2.55e-07	-15.7436	7.16276	-1.50755	PLK3	polo-like kinase 3	0.351709
axo06339-f_at	9.39e-06	1.08e-06	-13.0712	5.56813	-1.50542	ALOX12B	arachidonate 12-lipoxygenase, 12R type	0.352228
axo12580-f_at	2.31e-07	5.83e-09	-25.4324	11.2951	-1.50505	UPK3A	uroplakin 3A precursor	0.352317
axo12983-r_at	1.06e-07	1.74e-09	-29.5978	12.5883	-1.50423	EHF	ets homologous factor	0.352518
axo10260-f_at	0.00064	0.000191	-6.47332	-0.156136	-1.50222	PTGS2	prostaglandin-endoperoxide synthase 2 precursor	0.353009
axo03054-f_at	6.77e-07	3.09e-08	-20.598	9.48125	-1.50105	PDE4B	phosphodiesterase 4B, cAMP-specific isoform 1	0.353296
axo19711-f_at	5.21e-07	2.02e-08	-21.7409	9.94695	-1.49999	B3GNT5	UDP-GlcNAc:betaGal beta-1,3-N-acetylglucosaminyltransferase 5	0.353557
axo00699-r_at	2.67e-07	7.48e-09	-24.6452	11.0255	-1.49956	RRM2	ribonucleotide reductase M2 polypeptide	0.353662
axo15787-f_at	8.73e-07	4.44e-08	-19.6772	9.08655	-1.49928	GLTP	glycolipid transfer protein	0.353731
axo06518-r_at	1.57e-07	3.25e-09	-27.3742	11.9241	-1.49886	COL17A1	alpha 1 type XVII collagen	0.353833
axo17123-f_at	8.36e-07	4.19e-08	-19.8219	9.1498	-1.49886	DNAJC10	DnaJ (Hsp40) homolog, subfamily C, member 10	0.353833
axo07395-f_at	5.21e-06	5.01e-07	-14.4364	6.41789	-1.49746	SERPINE1	plasminogen activator inhibitor-1	0.354177
axo03168-f_at	4.89e-07	1.86e-08	-21.9738	10.0388	-1.49389	PHLDB3	pleckstrin homology-like domain, family B, member 3	0.355055
axo00064-r_x_at	3.52e-07	1.15e-08	-23.3305	10.5545	-1.49248	KRT71	keratin 71	0.3554
axo11975-r_at	2.21e-06	1.61e-07	-16.7052	7.67353	-1.49147	RBM14	RNA binding motif protein 14	0.355649
axo08724-r_at	1.26e-06	7.45e-08	-18.4237	8.51836	-1.48871	CYP51A1	cytochrome P450, family 51, subfamily A, polypeptide 1 isoform 1	0.35633
axo05497-f_at	7.25e-06	7.77e-07	-13.641	5.93252	-1.47959	LNX1	ligand of numb-protein X 1 isoform a	0.35859
axo08895-f_at	4.95e-06	4.67e-07	-14.5677	6.49554	-1.47916	RPS6KB1	ribosomal protein S6 kinase, 70kDa, polypeptide 1	0.358698
axo19900-f_at	3.23e-06	2.69e-07	-15.64	7.10595	-1.4783	FBLIM1	filamin-binding LIM protein-1 isoform c	0.358912
axo16150-f_at	2.18e-07	5.36e-09	-25.6991	11.3844	-1.4781	FERMT1	kindlin-1	0.35896
axo12378-f_at	2.04e-07	4.75e-09	-26.0913	11.5141	-1.47767	SC4MOL	sterol-C4-methyl oxidase-like isoform 1	0.359068
axo10093-r_at	5.87e-07	2.43e-08	-21.235	9.74397	-1.47578	ACSL4	acyl-CoA synthetase long-chain family member 4 isoform 1	0.359538
axo18239-f_at	5.76e-07	2.36e-08	-21.3169	9.77716	-1.47511	ST14	suppression of tumorigenicity 14	0.359706
axo21473-f_at	7.42e-07	3.5e-08	-20.28	9.34699	-1.47386	PDLIM2	PDZ and LIM domain 2 isoform 3	0.360017
axo08894-f_at	3.01e-07	9.07e-09	-24.0519	10.8163	-1.47384	RPS6KB1	ribosomal protein S6 kinase, 70kDa, polypeptide 1	0.360024
axo07100-f_at	3.92e-07	1.35e-08	-22.8757	10.3852	-1.47324	CLDN7	claudin 7	0.360172
axo12476-f_at	4.45e-05	7.74e-06	-10.0901	3.38572	-1.47225	CCNI	cyclin I	0.36042
axo05417-f_at	1.84e-06	1.27e-07	-17.2134	7.93194	-1.4688	TP63	tumor protein p63 isoform 6	0.361284
axo03621-f_at	2.56e-06	1.95e-07	-16.2933	7.45836	-1.46878	WARS	tryptophanyl-tRNA synthetase isoform b	0.361287
axo03324-f_at	5.89e-06	5.89e-07	-14.1372	6.23833	-1.46797	MARVELD2	MARVEL domain containing 2 isoform 1	0.361491
axo01062-f_at	4.72e-07	1.76e-08	-22.1185	10.0953	-1.46747	OTOA	otoancorin isoform 1	0.361615
axo00390-f_at	4.27e-07	1.51e-08	-22.5453	10.2599	-1.46745	ACY3	aspartoacylase (aminocyclase) 3	0.361622
axo11120-f_at	0.000646	0.000193	-6.46289	-0.168318	-1.46688	SMC4	SMC4 structural maintenance of chromosomes 4-like 1	0.361765
axo00787-r_at	1.43e-07	2.79e-09	-27.8968	12.0853	-1.46491	KIF23	kinesin family member 23 isoform 1	0.362258
axo01386-f_at	1.39e-06	8.64e-08	-18.0798	8.3557	-1.46119	GPRC6A	G protein-coupled receptor, family C, group 6, member A	0.363192
axo05294-f_at	8.05e-05	1.61e-05	-9.14837	2.5771	-1.46051	FLNA	filamin A, alpha isoform 2	0.363366
axo12161-f_s_at	1.1e-05	1.32e-06	-12.7329	5.34472	-1.45733	SLC2A1	solute carrier family 2 (facilitated glucose transporter), member 1	0.364166
axo17023-f_at	3.15e-07	9.67e-09	-23.8572	10.7464	-1.45532	ANLN	anillin, actin binding protein	0.364674
axo18950-f_at	1.03e-06	5.6e-08	-19.1035	8.83112	-1.45444	E2F8	E2F family member 8	0.364896
axo07720-f_at	4.24e-07	1.5e-08	-22.5777	10.2723	-1.45168	DES	desmin	0.365595
axo08265-f_at	1.96e-06	1.38e-07	-17.0301	7.83958	-1.44977	NCBP1	nuclear cap binding protein subunit 1, 80kDa	0.366079
axo11127-f_at	3.62e-06	3.08e-07	-15.3648	6.95325	-1.44914	ITGA3	integrin alpha 3 isoform b precursor	0.366239
axo10931-f_at	2.31e-06	1.7e-07	-16.5862	7.61186	-1.44504	FOS	v-fos FBJ murine osteosarcoma viral oncogene homolog	0.367283
axo00518-f_at	1.5e-06	9.54e-08	-17.8514	8.24595	-1.44498	DEDD2	death effector domain-containing DNA binding protein 2	0.367297
axo10701-f_at	2.5e-07	6.78e-09	-24.9488	11.1305	-1.44415	PLK1	polo-like kinase 1	0.36751
axo17745-f_at	8.36e-07	4.19e-08	-19.8181	9.14817	-1.44401	TAOK1	TAO kinase 1	0.367544
axo10348-f_at	4.29e-06	3.89e-07	-14.9159	6.69837	-1.4433	ATP6V0D1	ATPase, H+ transporting, lysosomal, V0 subunit d1	0.367725
axo02611-f_at	8.08e-05	1.61e-05	-9.14239	2.57173	-1.43965	UPP1	uridine phosphorylase 1	0.368657
axo00707-f_at	0.00435	0.00173	-4.60217	-2.57084	-1.43923	CCDC109A	coiled-coil domain containing 109A	0.368764
axo20163-f_at	4.84e-07	1.82e-08	-22.0347	10.0626	-1.43813	HSH2D	hematopoietic SH2 domain containing	0.369046
axo16047-f_at	1.04e-06	5.72e-08	-19.0536	8.80854	-1.43812	PARP14	poly (ADP-ribose) polymerase family, member 14	0.369048
axo19300-f_at	7.38e-05	1.44e-05	-9.28291	2.69683	-1.43755	TRABD	TraB domain containing	0.369193
axo17249-f_at	2.93e-07	8.72e-09	-24.1716	10.8589	-1.43251	GTPBP2	GTP binding protein 2	0.370486
axo12200-f_at	1.49e-06	9.46e-08	-17.8709	8.25539	-1.43092	KHDRBS1	KH domain containing, RNA binding, signal transduction associated 1	0.370893
axo06953-f_at	2.84e-06	2.25e-07	-15.9987	7.30116	-1.42111	PLA2G4C	phospholipase A2, group IVC isoform 3	0.373426
axo07325-f_at	3.4e-07	1.09e-08	-23.5059	10.6189	-1.41764	GCLC	glutamate-cysteine ligase, catalytic subunit	0.374324
axo00947-f_at	3.15e-06	2.6e-07	-15.7028	7.14046	-1.41706	EHD4	EH-domain containing 4	0.374474
axo19587-f_at	5.85e-07	2.42e-08	-21.2472	9.7489	-1.41674	RTP3	transmembrane protein 7	0.374558
axo02994-f_at	1.12e-07	1.92e-09	-29.244	12.4863	-1.41666		leader-binding protein 32 isoform 2	0.374577
axo11122-f_at	9.32e-05	1.92e-05	-8.93025	2.37983	-1.41304	SMC4	SMC4 structural maintenance of chromosomes 4-like 1	0.37552
axo08726-f_at	3.79e-07	1.29e-08	-23.0087	10.435	-1.41216	MAPK12	mitogen-activated protein kinase 12	0.375748
axo07070-f_at	9.96e-07	5.32e-08	-19.2293	8.8878	-1.40607	CHKA	choline kinase alpha isoform a	0.377337
axo11178-r_at	1.87e-07	4.13e-09	-26.558	11.6657	-1.40528	KRT6A	keratin 6A	0.377546
axo12733-f_at	2.06e-07	4.83e-09	-26.0394	11.497	-1.40499	ZNF185	zinc finger protein 185	0.377621
axo15616-f_at	1.87e-05	2.61e-06	-11.6516	4.592	-1.40325	MAN1B1	alpha 1,2-mannosidase	0.378077
axo10248-f_at	3.43e-05	5.6e-06	-10.5347	3.74512	-1.39886	RPS6KA3	ribosomal protein S6 kinase, 90kDa, polypeptide 3	0.379228
axo01790-f_at	2.01e-06	1.42e-07	-16.9701	7.80915	-1.39842	C10orf47	hypothetical protein LOC254427	0.379345
axo15783-r_at	5.59e-07	2.27e-08	-21.4253	9.8209	-1.39687		G-2 and S-phase expressed 1	0.379752
axo03207-f_at	2.67e-07	7.52e-09	-24.6278	11.0194	-1.39608	TGM6	transglutaminase 6	0.379961
axo16888-f_at	1.26e-07	2.28e-09	-28.6198	12.303	-1.39428	MUC4	mucin 4 isoform a	0.380434
axo15063-f_at	5.58e-07	2.25e-08	-21.4417	9.82748	-1.39182	FAM98A	hypothetical protein LOC25940	0.381083
axo11056-f_at	2.13e-07	5.06e-09	-25.8865	11.4466	-1.39104	SHMT2	serine hydroxymethyltransferase 2 (mitochondrial)	0.381289
axo11580-r_s_at	2.66e-06	2.05e-07	-16.19	7.40353	-1.39098	HNRNPM	heterogeneous nuclear ribonucleoprotein M isoform a	0.381307
axo02912-f_at	1.35e-06	8.31e-08	-18.1694	8.39837	-1.39019	SASS6	spindle assembly abnormal protein 6	0.381515
axo11179-f_at	1.19e-05	1.47e-06	-12.5602	5.22852	-1.38941	LAD1	ladinin 1	0.381722
axo20238-f_at	6.39e-07	2.76e-08	-20.8961	9.6052	-1.38418	CASP10	caspase 10 isoform d preproprotein	0.383107
axo12238-r_at	5.32e-07	2.07e-08	-21.668	9.91799	-1.38343	SULT1C4	sulfotransferase family, cytosolic, 1C, member 2	0.383306
axo19112-f_at	1.71e-06	1.15e-07	-17.4367	8.04315	-1.383	POF1B	premature ovarian failure, 1B	0.383421
axo02631-r_at	2.26e-05	3.34e-06	-11.2799	4.31854	-1.38178	FAM101A	hypothetical protein LOC144347	0.383746
axo11634-f_at	3.26e-07	1.01e-08	-23.7196	10.6967	-1.38162	P11	placental protein 11 precursor	0.383787
axo04547-f_at	9.47e-07	4.97e-08	-19.3946	8.96169	-1.38069	SLC39A7	solute carrier family 39, member 7	0.384034
axo07928-f_at	3.23e-07	1e-08	-23.7583	10.7108	-1.38061	HMGCS1	hydroxymethylglutaryl-CoA synthase 1	0.384057
axo01101-f_at	9.44e-07	4.94e-08	-19.4092	8.96818	-1.37882	IL20RB	interleukin 20 receptor beta precursor	0.384533
axo19102-f_at	2.23e-06	1.62e-07	-16.6815	7.66128	-1.3778	WDR76	WD repeat domain 76	0.384806
axo04273-f_at	2.43e-07	6.38e-09	-25.1433	11.1971	-1.37779	MPO	myeloperoxidase	0.384807
axo00192-r_at	4.27e-07	1.52e-08	-22.5288	10.2536	-1.37725	TMEM123	transmembrane protein 123 precursor	0.384952
axo13084-r_at	1.64e-06	1.08e-07	-17.5746	8.11109	-1.37676	CABIN1	calcineurin binding protein 1	0.385082
axo06046-r_at	8.42e-06	9.38e-07	-13.3124	5.72416	-1.37542	RTL1	retrotransposon-like 1	0.38544
axo11566-f_at	0.000499	0.000142	-6.75771	0.17077	-1.37454	MYH10	myosin, heavy polypeptide 10, non-muscle	0.385676
axo08761-f_s_at	4.35e-07	1.57e-08	-22.4399	10.2196	-1.37194	SFRS2	splicing factor, arginine/serine-rich 2	0.386372
axo06120-r_at	1.56e-05	2.09e-06	-11.9929	4.83624	-1.37141	RTL1	retrotransposon-like 1	0.386514
axo03139-f_at	2.65e-05	4.07e-06	-10.9897	4.09938	-1.37053	SEC24C	SEC24-related protein C	0.386748
axo12433-f_at	6.01e-06	6.05e-07	-14.0901	6.20971	-1.36936	PRSS21	testisin isoform 1	0.387062
axo05712-r_at	0.0017	0.000596	-5.45729	-1.40803	-1.36591	SMARCAD1	SWI/SNF-related, matrix-associated actin-dependent regulator of chromatin, subfamily a, containing DEAD/H box 1 isoform a	0.387989
axo02731-f_at	4.76e-06	4.44e-07	-14.6614	6.55061	-1.36579	BCL9L	B-cell CLL/lymphoma 9-like	0.388021
axo11802-r_at	8.24e-07	4.1e-08	-19.873	9.17203	-1.36548	OAS3	2'-5'oligoadenylate synthetase 3	0.388106
axo08179-f_at	1.66e-07	3.48e-09	-27.1338	11.8488	-1.3647	MMP3	matrix metalloproteinase 3 preproprotein	0.388316
axo01847-f_s_at	4.65e-07	1.72e-08	-22.1826	10.1203	-1.3644	SPINT1	serine peptidase inhibitor, Kunitz type 1 isoform 2 precursor	0.388396
axo12700-r_at	0.0348	0.0184	-2.94844	-5.08508	-1.36413	TCHH	trichohyalin	0.388469
axo14439-f_at	4.04e-07	1.41e-08	-22.7541	10.3393	-1.36325	SDC1	syndecan 1 precursor	0.388707
axo14898-r_at	2.15e-07	5.18e-09	-25.8091	11.421	-1.36159	ARHGEF4	Rho guanine nucleotide exchange factor 4 isoform a	0.389154
axo10934-f_at	1.33e-06	8.05e-08	-18.2433	8.43338	-1.36134	GAK	cyclin G associated kinase	0.389222
axo04229-f_at	1.47e-05	1.93e-06	-12.1171	4.92359	-1.36061	PAPD5	PAP associated domain containing 5 isoform a	0.389417
axo12269-f_at	5.55e-07	2.24e-08	-21.458	9.83403	-1.35937	PLK2	polo-like kinase 2	0.389753
axo00820-f_at	4.43e-07	1.62e-08	-22.3612	10.1893	-1.3581		BCL2-associated X protein isoform epsilon	0.390096
axo15443-r_at	2.84e-07	8.33e-09	-24.31	10.9079	-1.35772	UBE2J1	ubiquitin-conjugating enzyme E2, J1	0.390198
axo06995-f_at	5.88e-05	1.09e-05	-9.6411	3.00859	-1.357	BCAT2	branched chain aminotransferase 2, mitochondrial	0.390392
axo01920-f_at	2.59e-07	7.14e-09	-24.7899	11.0757	-1.35605	ITGB1BP3	integrin beta 1 binding protein 3	0.39065
axo01987-f_at	3.98e-07	1.38e-08	-22.8133	10.3616	-1.35479	EYA2	eyes absent 2 isoform b	0.390991
axo00847-r_at	1.9e-06	1.33e-07	-17.1165	7.88327	-1.35398	CANT1	calcium activated nucleotidase 1	0.391212
axo00973-f_at	1.99e-06	1.4e-07	-17.0036	7.8262	-1.35283	OSBPL2	oxysterol-binding protein-like protein 2 isoform 2	0.391523
axo20626-f_at	1.36e-06	8.37e-08	-18.1514	8.38981	-1.35266	MYC	myc proto-oncogene protein	0.391569
axo19871-r_at	2.64e-06	2.03e-07	-16.209	7.41365	-1.35172	TMEM79	transmembrane protein 79	0.391824
axo21059-f_at	6.49e-07	2.84e-08	-20.8195	9.57354	-1.34968	KIAA0101	hypothetical protein LOC9768 isoform 1	0.392379
axo07536-f_at	1.39e-05	1.79e-06	-12.24	5.00916	-1.34859	DST	dystonin isoform 1e precursor	0.392674
axo14487-f_at	2.8e-06	2.19e-07	-16.0523	7.32995	-1.34756	PPRC1	peroxisome proliferator-activated receptor gamma, coactivator-related 1	0.392956
axo07687-r_at	2.43e-07	6.39e-09	-25.1351	11.1943	-1.34744	CSNK1A1	casein kinase 1, alpha 1 isoform 2	0.392988
axo12999-f_at	3.13e-06	2.57e-07	-15.7304	7.15555	-1.34692	FBXO5	F-box only protein 5 isoform a	0.39313
axo02381-f_at	4.27e-06	3.85e-07	-14.933	6.70817	-1.34451	RHOT1	ras homolog gene family, member T1 isoform 1	0.393789
axo02977-f_at	2.49e-07	6.73e-09	-24.9758	11.1398	-1.34296	AQP1	aquaporin 1	0.39421
axo15548-f_at	6.74e-07	3.04e-08	-20.6425	9.49986	-1.34179	COPG	coatomer protein complex, subunit gamma 1	0.39453
axo11751-f_at	3.52e-05	5.78e-06	-10.49	3.70959	-1.34158	DYNC1LI2	dynein, cytoplasmic, light intermediate polypeptide 2	0.394587
axo17350-f_at	6.67e-05	1.27e-05	-9.43988	2.83468	-1.34038	TM9SF3	transmembrane 9 superfamily member 3	0.394916
axo08505-f_at	3.25e-07	1.01e-08	-23.7353	10.7024	-1.34031	PRTN3	proteinase 3 (serine proteinase, neutrophil, Wegener granulomatosis autoantigen)	0.394936
axo07055-f_at	1.73e-06	1.17e-07	-17.3927	8.02134	-1.34021	CDS1	CDP-diacylglycerol synthase 1	0.394963
axo15784-f_at	8.68e-06	9.74e-07	-13.2462	5.68155	-1.33953		G-2 and S-phase expressed 1	0.395148
axo08264-f_at	1.42e-06	8.86e-08	-18.0208	8.32748	-1.33945	NCBP1	nuclear cap binding protein subunit 1, 80kDa	0.39517
axo04208-f_at	4.11e-05	7.03e-06	-10.2203	3.49238	-1.33906	PEG10	paternally expressed 10 isoform RF1	0.395278
axo19808-f_at	2.42e-07	6.34e-09	-25.1644	11.2043	-1.33786	FAR1	fatty acyl CoA reductase 1	0.395606
axo11515-f_at	3.51e-07	1.14e-08	-23.3588	10.565	-1.33644	MCM7	minichromosome maintenance complex component 7 isoform 1	0.395997
axo18492-f_at	2.66e-06	2.05e-07	-16.1905	7.40379	-1.33215	NUCKS1	nuclear casein kinase and cyclin-dependent kinase substrate 1	0.397175
axo07047-f_at	1.61e-06	1.05e-07	-17.6359	8.14117	-1.33094	CDC6	cell division cycle 6 protein	0.39751
axo18797-r_at	1.1e-06	6.18e-08	-18.8643	8.72235	-1.33092	GPR172A	G protein-coupled receptor 172A	0.397515
axo20953-f_s_at	1.03e-06	5.58e-08	-19.1128	8.83532	-1.32969		EBNA1 binding protein 2	0.397854
axo01421-f_at	9.19e-07	4.75e-08	-19.5096	9.01274	-1.32827	OBFC2A	oligonucleotide/oligosaccharide-binding fold containing 2A	0.398245
axo18353-r_at	8.63e-06	9.66e-07	-13.262	5.69173	-1.32764	XYLT1	xylosyltransferase I	0.398419
axo09359-f_at	4.65e-06	4.32e-07	-14.7139	6.58127	-1.32548	BCAS1	breast carcinoma amplified sequence 1	0.399015
axo15008-f_at	1.14e-06	6.54e-08	-18.7289	8.66019	-1.32476	POLR1A	polymerase (RNA) I polypeptide A, 194kDa	0.399216
axo06308-r_at	6.57e-06	6.83e-07	-13.8689	6.07424	-1.32399	LOC440498	heat shock factor binding protein 1-like	0.399429
axo14470-r_at	0.00066	0.000197	-6.44069	-0.194284	-1.32231	RRP1B	ribosomal RNA processing 1 homolog B	0.399895
axo19870-r_at	5.53e-07	2.23e-08	-21.4714	9.83942	-1.32215	BTBD10	K+ channel tetramerization protein	0.399937
axo12262-f_at	8.18e-07	4.05e-08	-19.9079	9.18719	-1.32057	CAPN9	calpain 9 isoform 1	0.400377
axo11025-f_at	2.39e-07	6.09e-09	-25.288	11.2463	-1.31891	NFIL3	nuclear factor, interleukin 3 regulated	0.400838
axo08594-f_at	4.16e-07	1.46e-08	-22.6414	10.2965	-1.31713	PTPRZ1	protein tyrosine phosphatase, receptor-type, zeta1 precursor	0.401333
axo08619-f_at	3.91e-07	1.34e-08	-22.8898	10.3905	-1.31664	CYP2C8	cytochrome P450, family 2, subfamily C, polypeptide 8	0.401468
axo01880-r_at	1.31e-06	7.93e-08	-18.276	8.44884	-1.31613	C9orf21	hypothetical protein LOC195827	0.40161
axo13660-f_at	1.31e-06	7.93e-08	-18.2785	8.45004	-1.31547	HEBP2	heme binding protein 2	0.401795
axo08723-f_at	6.84e-07	3.15e-08	-20.5475	9.46005	-1.31467	CYP51A1	cytochrome P450, family 51, subfamily A, polypeptide 1 isoform 1	0.402018
axo16609-f_at	4.72e-05	8.31e-06	-9.99486	3.30696	-1.31418	CENPQ	centromere protein Q	0.402155
axo21419-f_s_at	0.00012	2.6e-05	-8.56673	2.04206	-1.31324	RHEBL1	Ras homolog enriched in brain like 1	0.402415
axo06293-r_at	9.5e-06	1.1e-06	-13.0464	5.5519	-1.3127	CASP5	caspase 5 isoform f precursor	0.402566
axo01503-f_at	5.24e-06	5.04e-07	-14.4241	6.41054	-1.31179	ZNF572	zinc finger protein 572	0.402821
axo12380-f_at	3.37e-07	1.07e-08	-23.5472	10.634	-1.31121	SLC20A2	solute carrier family 20, member 2	0.402983
axo17184-f_at	2.35e-07	5.97e-09	-25.356	11.2693	-1.30955	RHOF	ras homolog gene family, member F	0.403446
axo20084-f_s_at	4.12e-06	3.69e-07	-15.0153	6.75544	-1.30858	LMNB2	lamin B2	0.403718
axo12925-f_at	0.0275	0.0141	-3.125	-4.8048	-1.30803	ELL2	elongation factor, RNA polymerase II, 2	0.403872
axo08005-f_at	6.7e-07	3e-08	-20.6745	9.51325	-1.30769	ITPR3	inositol 1,4,5-triphosphate receptor, type 3	0.403967
axo12248-f_at	3.3e-07	1.03e-08	-23.664	10.6766	-1.30708	PTGES3	unactive progesterone receptor, 23 kD	0.404138
axo13707-f_at	6.46e-07	2.82e-08	-20.8428	9.58317	-1.30437	SACS	sacsin	0.404897
axo16875-r_at	2.96e-07	8.86e-09	-24.1222	10.8413	-1.29885	STRBP	spermatid perinuclear RNA binding protein	0.406451
axo20149-f_at	1.2e-06	6.96e-08	-18.582	8.59218	-1.29678	SPRYD3	SPRY domain containing 3	0.407035
axo12289-f_at	3.45e-07	1.12e-08	-23.4285	10.5906	-1.29673	STARD10	START domain containing 10	0.407047
axo12926-r_at	0.0348	0.0184	-2.94875	-5.08458	-1.29453	ELL2	elongation factor, RNA polymerase II, 2	0.40767
axo03437-f_at	1.08e-05	1.3e-06	-12.7649	5.36605	-1.29389	NCKAP1	NCK-associated protein 1 isoform 2	0.407849
axo18360-f_at	1.62e-05	2.19e-06	-11.9209	4.78528	-1.29365	EIF4H	eukaryotic translation initiation factor 4H isoform 1	0.407919
axo10716-r_at	2.6e-07	7.22e-09	-24.7522	11.0627	-1.29345	PSMD5	proteasome 26S non-ATPase subunit 5	0.407974
axo01065-r_at	9.2e-07	4.76e-08	-19.5027	9.00967	-1.29281	SLFN13	schlafen family member 13	0.408154
axo07756-f_at	3.68e-07	1.24e-08	-23.1266	10.479	-1.29189	EGR1	early growth response 1	0.408416
axo11241-f_at	2.49e-07	6.73e-09	-24.9754	11.1396	-1.29183	SGK1	serum/glucocorticoid regulated kinase 1 isoform 1	0.408432
axo19200-f_at	2.77e-06	2.16e-07	-16.0841	7.34699	-1.29171	KIAA1305	hypothetical protein LOC57523	0.408466
axo02983-f_at	8.46e-07	4.26e-08	-19.7781	9.13072	-1.28995	SHISA4	shisa homolog 4	0.408964
axo06619-f_at	0.0012	0.000398	-5.80419	-0.965287	-1.28706	CHORDC1	cysteine and histidine-rich domain-containing protein 1 isoform b	0.409785
axo15468-f_at	4.01e-06	3.55e-07	-15.0895	6.79778	-1.28706	SLMO2	slowmo homolog 2	0.409786
axo06027-f_x_at	2.49e-07	6.62e-09	-25.0245	11.1565	-1.28333	KRT5	keratin 5	0.410845
axo13352-r_at	1.14e-06	6.48e-08	-18.7526	8.67109	-1.28062	SNX10	sorting nexin 10	0.411617
axo10259-f_at	0.00111	0.000362	-5.88847	-0.860157	-1.28041	PTGS2	prostaglandin-endoperoxide synthase 2 precursor	0.411678
axo12520-r_at	8.45e-06	9.42e-07	-13.3037	5.71853	-1.28022	ADAP1	centaurin, alpha 1	0.411734
axo09387-f_at	1.04e-06	5.68e-08	-19.0699	8.81593	-1.27935	KHSRP	KH-type splicing regulatory protein (FUSE binding protein 2)	0.411981
axo05870-f_at	5.7e-06	5.64e-07	-14.2169	6.28649	-1.27471	PPP3CA	protein phosphatase 3, catalytic subunit, alpha isoform isoform 2	0.413307
axo10352-f_at	6.38e-07	2.74e-08	-20.9125	9.61197	-1.26999	SLC16A6	solute carrier family 16, member 6	0.414662
axo17290-f_at	9.21e-07	4.78e-08	-19.4931	9.00542	-1.26997	IRGC	immunity-related GTPase family, cinema	0.414668
axo15433-r_at	0.000828	0.000258	-6.19201	-0.489305	-1.26989	FBN1	fibrillin 1 precursor	0.414691
axo04877-f_at	4.41e-07	1.6e-08	-22.3834	10.1979	-1.26874	PMM2	phosphomannomutase 2	0.415022
axo03777-f_at	2.96e-06	2.38e-07	-15.8864	7.24051	-1.26414	hCG_1773238	PREDICTED: similar to hCG1773238	0.416347
axo02479-f_at	4.43e-06	4.05e-07	-14.835	6.65164	-1.26274	SERINC5	developmentally regulated protein TPO1	0.416751
axo08487-r_at	2.76e-06	2.15e-07	-16.0908	7.35061	-1.26172	MAPK6	mitogen-activated protein kinase 6	0.417045
axo08863-f_at	1.8e-06	1.23e-07	-17.2815	7.96598	-1.26156	SQLE	squalene epoxidase	0.417092
axo08037-f_at	1.94e-07	4.45e-09	-26.3102	11.5855	-1.26149	KPNA2	karyopherin alpha 2	0.417112
axo08123-f_at	2.12e-07	5e-09	-25.9253	11.4595	-1.26144	EPCAM	epithelial cell adhesion molecule precursor	0.417128
axo11671-f_at	1.51e-06	9.72e-08	-17.8092	8.22553	-1.25996	TNIP1	TNFAIP3 interacting protein 1	0.417556
axo12615-r_at	5.21e-07	2.02e-08	-21.7452	9.94862	-1.25724	UPK1A	uroplakin 1A	0.418343
axo11112-f_at	2.42e-07	6.33e-09	-25.1665	11.205	-1.25693	CHAF1A	chromatin assembly factor 1, subunit A (p150)	0.418432
axo00756-f_at	2.84e-07	8.34e-09	-24.3083	10.9073	-1.25485	C6orf150	hypothetical protein LOC115004	0.419036
axo06723-f_at	7.74e-06	8.43e-07	-13.4974	5.84201	-1.25326	SLC1A5	solute carrier family 1 member 5 isoform 3	0.419499
axo01756-f_at	6.34e-07	2.7e-08	-20.9527	9.62855	-1.25261	FAM26D	hypothetical protein LOC221301	0.419687
axo14354-r_at	3.52e-07	1.15e-08	-23.331	10.5547	-1.25105	SPEN	spen homolog, transcriptional regulator	0.420141
axo16226-f_at	4.63e-07	1.71e-08	-22.2014	10.1275	-1.25035	RETSAT	all-trans-13,14-dihydroretinol saturase	0.420346
axo05298-f_at	0.00151	0.000515	-5.58068	-1.24867	-1.24866	FLNA	filamin A, alpha isoform 2	0.420838
axo03153-f_at	1.32e-06	7.99e-08	-18.2584	8.44055	-1.24653	MAP4K5	mitogen-activated protein kinase kinase kinase kinase 5	0.421461
axo21222-f_at	2.91e-06	2.33e-07	-15.9275	7.26272	-1.24568	BCL2L10	BCL2-like 10 (apoptosis facilitator)	0.42171
axo12849-r_s_at	4.92e-07	1.87e-08	-21.9516	10.0301	-1.24542	TWF2	twinfilin-like protein	0.421784
axo10906-f_at	1.06e-06	5.87e-08	-18.9888	8.77916	-1.24541	ETS1	v-ets erythroblastosis virus E26 oncogene homolog 1 isoform 2	0.421789
axo04163-f_at	7.07e-06	7.52e-07	-13.6974	5.9678	-1.24411	AIM1L	absent in melanoma 1-like	0.422168
axo12059-f_at	1.29e-05	1.62e-06	-12.3953	5.1162	-1.24321	SPTLC1	serine palmitoyltransferase subunit 1 isoform a	0.42243
axo01912-f_at	1.37e-05	1.76e-06	-12.2616	5.02415	-1.24244	MLL3	myeloid/lymphoid or mixed-lineage leukemia 3	0.422657
axo04303-f_at	1.06e-06	5.81e-08	-19.015	8.79103	-1.2414	TFAP2A	transcription factor AP-2 alpha isoform c	0.422963
axo10463-f_at	1.27e-06	7.54e-08	-18.3949	8.50485	-1.24036	HS6ST1	heparan sulfate 6-O-sulfotransferase 1	0.423266
axo11717-f_at	0.000124	2.71e-05	-8.51951	1.99733	-1.24035	NDC80	kinetochore associated 2	0.42327
axo00433-f_at	9.8e-06	1.14e-06	-12.9842	5.51116	-1.24025	SPSB4	splA/ryanodine receptor domain and SOCS box containing 4	0.423299
axo18979-f_at	7.85e-07	3.78e-08	-20.082	9.26234	-1.23952	DHRS12	dehydrogenase/reductase (SDR family) member 12 isoform 2	0.423513
axo09128-f_at	0.00328	0.00126	-4.85	-2.22324	-1.23951	ZFP36	zinc finger protein 36, C3H type, homolog	0.423515
axo06445-f_at	2.9e-07	8.62e-09	-24.2085	10.872	-1.23871	FBXO5	F-box only protein 5 isoform b	0.42375
axo00772-r_at	9.64e-06	1.12e-06	-13.0133	5.53028	-1.23862	ZMYND19	zinc finger, MYND domain containing 19	0.423777
axo18944-f_at	3.64e-07	1.21e-08	-23.1975	10.5053	-1.23798	VPS37B	vacuolar protein sorting 37B	0.423966
axo18978-f_at	1.81e-06	1.24e-07	-17.264	7.95728	-1.23768	ZNF750	zinc finger protein 750	0.424055
axo20226-f_at	2.72e-05	4.2e-06	-10.9428	4.06347	-1.23703	SYTL2	synaptotagmin-like 2 isoform a	0.424244
axo07477-f_at	1.74e-06	1.17e-07	-17.3843	8.01715	-1.23635	ARL4D	ADP-ribosylation factor-like 4D	0.424445
axo04164-f_at	2.82e-06	2.22e-07	-16.0267	7.31621	-1.23399	CCNI2	cyclin I family, member 2	0.425141
axo21372-f_x_at	4.54e-07	1.66e-08	-22.2773	10.1569	-1.23121	KRT2	keratin 2	0.42596
axo18258-f_at	6.77e-07	3.1e-08	-20.5921	9.47879	-1.23053	SDF2L1	stromal cell-derived factor 2-like 1 precursor	0.426162
axo10353-f_at	3.46e-06	2.92e-07	-15.4718	7.0129	-1.23007	SLC16A6	solute carrier family 16, member 6	0.426297
axo00240-f_at	1.52e-05	2.03e-06	-12.0404	4.86976	-1.22875	RBM33	RNA binding motif protein 33	0.426688
axo17303-f_at	1.3e-06	7.79e-08	-18.3187	8.46899	-1.22732	ABCB9	ATP-binding cassette, sub-family B (MDR/TAP), member 9 isoform 2	0.427109
axo19470-f_at	6.75e-07	3.07e-08	-20.6201	9.49048	-1.2232	CDT1	chromatin licensing and DNA replication factor 1	0.428331
axo00827-r_at	6.32e-06	6.49e-07	-13.9622	6.13164	-1.22313	C19orf22	hypothetical protein LOC91300	0.428352
axo10049-r_at	0.0241	0.0121	-3.22579	-4.64545	-1.22253	DSP	desmoplakin isoform I	0.428532
axo03290-f_at	4.06e-07	1.42e-08	-22.727	10.329	-1.22174	HSPD1	chaperonin	0.428764
axo00782-f_at	8.79e-07	4.49e-08	-19.6492	9.07428	-1.22075	C6orf129	hypothetical protein LOC154467	0.42906
axo15308-f_at	1.64e-06	1.08e-07	-17.5767	8.11212	-1.21946	UMOD	uromodulin precursor	0.429443
axo00791-f_at	6.74e-06	7.06e-07	-13.8099	6.03776	-1.21822	SFMBT2	Scm-like with four mbt domains 2	0.429813
axo10894-f_at	6.7e-07	3.02e-08	-20.6596	9.50703	-1.2181	EGFR	epidermal growth factor receptor isoform a precursor	0.429849
axo13645-r_at	3.12e-06	2.56e-07	-15.7399	7.16072	-1.21654	BRD4	bromodomain-containing protein 4 isoform short	0.430314
axo13689-f_at	0.000427	0.000118	-6.93942	0.374609	-1.21634	ZNF318	zinc finger protein 318	0.430374
axo15231-r_at	4.57e-07	1.68e-08	-22.2548	10.1482	-1.21622	CPAMD8	C3 and PZP-like, alpha-2-macroglobulin domain containing 8	0.430409
axo09990-f_at	7.93e-07	3.87e-08	-20.0231	9.23696	-1.21565	CDH1	cadherin 1, type 1 preproprotein	0.430579
axo12195-f_at	6.56e-05	1.25e-05	-9.46675	2.85809	-1.21553	IGF2BP3	insulin-like growth factor 2 mRNA binding protein 3	0.430615
axo09838-f_at	2.28e-05	3.37e-06	-11.2633	4.30612	-1.21497	SEMA3F	semaphorin 3F	0.430781
axo09714-f_at	0.000158	3.63e-05	-8.1834	1.67304	-1.21484	IRF7	interferon regulatory factor 7 isoform d	0.430819
axo08786-r_at	1.44e-05	1.88e-06	-12.1578	4.95198	-1.21455	SLC7A1	solute carrier family 7 (cationic amino acid transporter, y+ system), member 1	0.430906
axo02131-f_at	3.83e-06	3.35e-07	-15.203	6.86221	-1.21343	MYCL1	l-myc-1 proto-oncogene isoform 1	0.431242
axo10648-r_at	1.07e-06	5.91e-08	-18.9713	8.7712	-1.20753	MARS	methionyl-tRNA synthetase	0.43301
axo18002-f_at	1.21e-06	7.1e-08	-18.5359	8.57075	-1.206	XK	membrane transport protein XK	0.433468
axo00414-r_at	6.37e-07	2.73e-08	-20.9292	9.61886	-1.20384	IFITM5	interferon induced transmembrane protein 5	0.434117
axo14101-f_at	7.42e-07	3.5e-08	-20.2808	9.34735	-1.201	ARHGAP11A	Rho GTPase activating protein 11A isoform 1	0.434975
axo09768-f_at	5.11e-06	4.87e-07	-14.4871	6.44794	-1.20038	EMX2	empty spiracles homeobox 2	0.43516
axo15661-f_at	6.35e-06	6.53e-07	-13.9494	6.12376	-1.19879	LEF1	lymphoid enhancer-binding factor 1 isoform 1	0.43564
axo09379-r_at	3.37e-06	2.82e-07	-15.5447	7.05336	-1.19804	YARS	tyrosyl-tRNA synthetase	0.435866
axo08808-f_at	4.87e-07	1.83e-08	-22.0053	10.0511	-1.19774	HLTF	helicase-like transcription factor	0.435958
axo11767-r_at	2.61e-07	7.28e-09	-24.7288	11.0546	-1.19734	C14orf37	hypothetical protein LOC145407	0.436079
axo02431-f_at	2.17e-06	1.56e-07	-16.7611	7.70229	-1.19711	CDH26	cadherin-like 26 isoform a	0.436147
axo05046-f_at	3.23e-07	1e-08	-23.7587	10.7109	-1.19689	ACTN1	actinin, alpha 1 isoform b	0.436216
axo19969-f_at	0.0011	0.000357	-5.8986	-0.847588	-1.19589	PHF6	PHD finger protein 6 isoform 1	0.436518
axo13742-f_at	3.23e-07	9.95e-09	-23.7727	10.716	-1.19578	GHITM	growth hormone inducible transmembrane protein	0.436552
axo20304-r_at	5.36e-05	9.73e-06	-9.78589	3.13183	-1.19466	CNP	2',3'-cyclic nucleotide 3' phosphodiesterase	0.43689
axo13866-f_at	8.79e-07	4.48e-08	-19.65	9.07465	-1.19415	ERO1L	ERO1-like	0.437043
axo11511-r_s_at	6.16e-06	6.25e-07	-14.0293	6.17269	-1.19359	MCM4	minichromosome maintenance complex component 4	0.437214
axo01351-f_at	1.03e-06	5.61e-08	-19.0982	8.82873	-1.19339	FAM110B	hypothetical protein LOC90362	0.437274
axo12253-f_at	5.59e-07	2.27e-08	-21.4233	9.82007	-1.19335	EPSTI1	epithelial stromal interaction 1 isoform 1	0.437288
axo09196-r_at	4.87e-07	1.84e-08	-22.0011	10.0495	-1.1909	SLC7A5	solute carrier family 7 (cationic amino acid transporter, y+ system), member 5	0.438029
axo20142-r_at	3.94e-06	3.47e-07	-15.134	6.82309	-1.19089	PPP1R15B	protein phosphatase 1, regulatory subunit 15B	0.438033
axo10880-r_at	8.08e-06	8.92e-07	-13.3996	5.7799	-1.19014	CRKL	v-crk sarcoma virus CT10 oncogene homolog (avian)-like	0.438259
axo17801-f_at	2.63e-05	4.02e-06	-11.0049	4.111	-1.18995	BCAM	basal cell adhesion molecule isoform 2 precursor	0.438317
axo08967-f_at	4.92e-07	1.88e-08	-21.9436	10.0269	-1.18952	THBS1	thrombospondin 1 precursor	0.43845
axo09348-f_at	9.21e-07	4.8e-08	-19.4832	9.00103	-1.18775	GCM1	glial cells missing homolog a	0.438988
axo12673-f_at	1.14e-05	1.39e-06	-12.644	5.2851	-1.18707	FICD	Huntingtin interacting protein E	0.439194
axo15631-f_at	3.02e-07	9.11e-09	-24.0375	10.8111	-1.18641	PADI3	peptidylarginine deiminase type III	0.439396
axo12635-f_at	9.49e-07	4.99e-08	-19.3849	8.95737	-1.18114	UBE2C	ubiquitin-conjugating enzyme E2C isoform 1	0.441003
axo18752-r_at	8.27e-07	4.13e-08	-19.8578	9.16543	-1.18044	CRELD2	cysteine-rich with EGF-like domains 2 isoform b	0.441216
axo12712-r_at	6.15e-07	2.6e-08	-21.0518	9.66924	-1.17353	VIL1	villin 1	0.443336
axo17005-f_at	3.15e-05	5.03e-06	-10.6854	3.86393	-1.17152	BATF3	basic leucine zipper transcription factor, ATF-like 3	0.443955
axo01403-f_at	8.77e-07	4.47e-08	-19.6582	9.07823	-1.17137	RPUSD2	RNA pseudouridylate synthase domain containing 2	0.443999
axo04143-r_at	4.07e-06	3.62e-07	-15.0497	6.77508	-1.17127		PREDICTED: similar to hCG1811042	0.444031
axo18297-f_at	6.09e-06	6.16e-07	-14.055	6.18837	-1.17082	TNN	tenascin N	0.444168
axo21367-f_at	1.36e-05	1.73e-06	-12.2911	5.04453	-1.17035	EXOSC6	homolog of yeast mRNA transport regulator 3	0.444314
axo19257-f_at	3.57e-07	1.18e-08	-23.2769	10.5348	-1.16884	COQ10B	coenzyme Q10 homolog B	0.444779
axo20454-f_at	1.71e-06	1.14e-07	-17.4492	8.04932	-1.16846	RPL31	ribosomal protein L31 isoform 3	0.444895
axo17822-f_at	1.04e-06	5.71e-08	-19.0564	8.80981	-1.1684	FBXW7	F-box and WD repeat domain containing 7 isoform 3	0.444913
axo06377-f_at	7.47e-07	3.54e-08	-20.2485	9.3336	-1.16808	PRKRA	protein kinase, interferon-inducible double stranded RNA dependent activator isoform 3	0.445013
axo13500-f_at	6.49e-07	2.84e-08	-20.8246	9.57565	-1.16807	ATAD2	ATPase family, AAA domain containing 2	0.445016
axo18365-f_at	0.000229	5.64e-05	-7.69961	1.18724	-1.1669	RAB38	RAB38	0.445376
axo20228-f_at	6.09e-07	2.57e-08	-21.0876	9.68389	-1.16652	TNFRSF6B	tumor necrosis factor receptor superfamily, member 6b	0.445494
axo11513-f_at	1.54e-05	2.06e-06	-12.0147	4.85163	-1.16599	MCM4	minichromosome maintenance complex component 4	0.445658
axo03215-f_at	0.000121	2.63e-05	-8.55493	2.0309	-1.16473	ARRB2	arrestin, beta 2 isoform 2	0.446048
axo07740-f_at	1.54e-06	9.92e-08	-17.7633	8.20325	-1.16298		dual specificity phosphatase 7	0.446589
axo19555-f_at	6.46e-07	2.81e-08	-20.8463	9.58464	-1.16288	EPPK1	epiplakin 1	0.446619
axo06679-f_at	9.55e-07	5.05e-08	-19.3567	8.94479	-1.16268	LOC284297	hypothetical protein LOC284297	0.446682
axo00468-f_at	1.73e-06	1.17e-07	-17.3932	8.0216	-1.16264	CHST14	dermatan 4 sulfotransferase 1	0.446696
axo07023-f_at	3.84e-07	1.31e-08	-22.9674	10.4196	-1.16247	CASP6	caspase 6 isoform alpha preproprotein	0.446748
axo11385-f_at	3.74e-05	6.23e-06	-10.3867	3.62697	-1.16129	RBM6	RNA binding motif protein 6	0.447114
axo08130-f_at	8.96e-07	4.59e-08	-19.5948	9.05032	-1.16094	MAD2L1	MAD2-like 1	0.447222
axo12794-r_at	4.6e-07	1.69e-08	-22.2271	10.1375	-1.16078	CA5B	carbonic anhydrase VB, mitochondrial precursor	0.44727
axo12218-f_at	0.00419	0.00166	-4.63645	-2.52225	-1.1604	AVIL	advillin	0.447387
axo14787-f_at	3.71e-06	3.21e-07	-15.2887	6.91053	-1.15983	ARAP2	ArfGAP with RhoGAP domain, ankyrin repeat and PH domain 2	0.447565
axo10647-f_at	1.71e-06	1.14e-07	-17.4484	8.04893	-1.159	MARS	methionyl-tRNA synthetase	0.447822
axo14364-r_at	8.65e-07	4.39e-08	-19.7049	9.09869	-1.15668	SPEN	spen homolog, transcriptional regulator	0.448543
axo05977-f_at	3.43e-05	5.59e-06	-10.5351	3.74542	-1.15642	IL4R	interleukin 4 receptor alpha chain isoform a precursor	0.448624
axo15663-f_at	1.29e-06	7.65e-08	-18.3614	8.48912	-1.15562	KLF2	Kruppel-like factor	0.448873
axo05068-f_at	1.45e-06	9.08e-08	-17.9647	8.30056	-1.15342	CYP4B1	cytochrome P450, family 4, subfamily B, polypeptide 1 isoform a	0.449559
axo00160-f_at	4.61e-06	4.27e-07	-14.7337	6.59283	-1.1527	LARP4	c-Mpl binding protein isoform a	0.449782
axo06664-r_at	5.44e-07	2.16e-08	-21.5534	9.87227	-1.15249	MX1	myxovirus resistance protein 1	0.449849
axo10171-f_at	9.3e-06	1.07e-06	-13.0909	5.58098	-1.14889	MCM2	minichromosome maintenance complex component 2	0.450973
axo06028-r_at	7.97e-07	3.9e-08	-19.9982	9.22625	-1.14825	KRT5	keratin 5	0.451172
axo01781-r_at	6.44e-07	2.8e-08	-20.8555	9.58842	-1.14666	GIMAP7	GTPase, IMAP family member 7	0.451669
axo03423-f_at	0.000172	4.02e-05	-8.06953	1.56076	-1.14413	TRIOBP	TRIO and F-actin binding protein isoform 6	0.452461
axo12290-f_at	3.64e-07	1.22e-08	-23.1743	10.4968	-1.14383	STARD10	START domain containing 10	0.452557
axo16536-f_at	3.07e-06	2.51e-07	-15.7774	7.18125	-1.14382	HELLS	helicase, lymphoid-specific	0.452559
axo08702-f_at	3.24e-06	2.69e-07	-15.6351	7.10323	-1.14357	RPA1	replication protein A1, 70kDa	0.45264
axo02259-f_at	5.37e-07	2.1e-08	-21.6321	9.90369	-1.14165	KRTCAP3	keratinocyte associated protein 3	0.45324
axo01922-r_at	6.85e-05	1.31e-05	-9.39902	2.79898	-1.13942	HNRNPH2	heterogeneous nuclear ribonucleoprotein H2	0.453943
axo02779-f_at	6.41e-07	2.78e-08	-20.8759	9.59684	-1.13934	RNF144B	IBR domain containing 2	0.453966
axo00532-f_s_at	8.65e-07	4.38e-08	-19.7089	9.10045	-1.13885	YTHDC1	splicing factor YT521-B isoform 2	0.454123
axo19070-f_at	2.86e-06	2.27e-07	-15.9774	7.28967	-1.13637		transmembrane channel-like 7	0.454904
axo04271-r_at	6.33e-06	6.51e-07	-13.9553	6.12741	-1.13569	ALAD	delta-aminolevulinic acid dehydratase	0.455117
axo02130-f_at	0.000159	3.67e-05	-8.17353	1.66335	-1.13544	MYCL1	l-myc-1 proto-oncogene isoform 1	0.455195
axo05823-f_at	6.49e-07	2.85e-08	-20.8134	9.57099	-1.1353	VWA5A	BCSC-1 isoform 1	0.455241
axo02759-r_s_at	1.84e-06	1.27e-07	-17.2206	7.93556	-1.1346	PCNA	proliferating cell nuclear antigen	0.455462
axo12965-f_at	4.05e-06	3.6e-07	-15.0625	6.78239	-1.1337	CD2AP	CD2-associated protein	0.455744
axo11013-f_at	6.66e-06	6.95e-07	-13.8393	6.05594	-1.13364	MYB	v-myb myeloblastosis viral oncogene homolog isoform 2	0.455764
axo17106-r_at	1.04e-06	5.68e-08	-19.0711	8.81647	-1.13343	GNMT	glycine N-methyltransferase	0.455831
axo01736-f_at	1.65e-06	1.09e-07	-17.5607	8.10427	-1.13299	ITGB4	integrin beta 4 isoform 1 precursor	0.45597
axo06808-f_at	7.91e-07	3.84e-08	-20.0413	9.24483	-1.13296	LDLR	low density lipoprotein receptor precursor	0.455979
axo03380-f_at	3.73e-05	6.2e-06	-10.3916	3.6309	-1.13263	ALOX15B	arachidonate 15-lipoxygenase, second type isoform a	0.456082
axo03595-f_at	6.99e-06	7.41e-07	-13.7239	5.98433	-1.13248	B4GALT4	UDP-Gal:betaGlcNAc beta 1,4- galactosyltransferase 4	0.456132
axo05820-f_at	1.25e-06	7.4e-08	-18.4396	8.52577	-1.13182	FAM108A1	hypothetical protein LOC81926 isoform 2	0.45634
axo16329-f_at	5.62e-05	1.03e-05	-9.70865	3.06628	-1.13147	PARP16	poly (ADP-ribose) polymerase family, member 16	0.456452
axo20315-f_at	9.55e-05	1.98e-05	-8.89507	2.34764	-1.13002	SURF4	surfeit 4	0.45691
axo17066-f_at	6.5e-06	6.74e-07	-13.8936	6.08946	-1.12976	ABCB4	ATP-binding cassette, subfamily B, member 4 isoform B	0.456992
axo14693-r_at	8e-07	3.93e-08	-19.9835	9.21991	-1.12854	BAT2D1	HBxAg transactivated protein 2	0.457377
axo17125-f_at	6.4e-07	2.78e-08	-20.881	9.59897	-1.12628	DNAJC10	DnaJ (Hsp40) homolog, subfamily C, member 10	0.458094
axo05611-f_at	2.71e-06	2.1e-07	-16.1392	7.37646	-1.12554	BLMH	bleomycin hydrolase	0.458329
axo06489-r_at	3.51e-07	1.15e-08	-23.3536	10.563	-1.12383	HNRPLL	heterogeneous nuclear ribonucleoprotein L-like isoform 2	0.458872
axo12802-r_at	5.42e-06	5.28e-07	-14.3385	6.35952	-1.1234	PACSIN2	protein kinase C and casein kinase substrate in neurons 2	0.459011
axo16459-f_at	3.9e-05	6.57e-06	-10.3135	3.56803	-1.1226	FAM83B	hypothetical protein LOC222584	0.459266
axo13349-f_at	2.21e-06	1.6e-07	-16.7138	7.67795	-1.12165	UBIAD1	UbiA prenyltransferase domain containing 1	0.459569
axo19856-f_at	3e-06	2.43e-07	-15.8431	7.21702	-1.12145	CHCHD5	coiled-coil-helix-coiled-coil-helix domain containing 5	0.459632
axo12914-f_at	1.58e-06	1.03e-07	-17.6871	8.16616	-1.12107	TARDBP	TAR DNA binding protein	0.459753
axo16404-f_at	1.87e-05	2.61e-06	-11.6493	4.59036	-1.12101	PRPF39	PRP39 pre-mRNA processing factor 39 homolog	0.45977
axo11224-r_at	0.0678	0.0397	-2.45288	-5.87177	-1.12029	ATP8B1	ATPase, class I, type 8B, member 1	0.460002
axo19644-f_at	3.16e-06	2.62e-07	-15.6922	7.13463	-1.11989	GCOM1	GRINL1A combined protein isoform 1	0.460128
axo19682-f_s_at	1.85e-05	2.57e-06	-11.6725	4.60714	-1.11628	CCNB1	cyclin B1	0.46128
axo20136-f_at	9.81e-06	1.14e-06	-12.9789	5.50767	-1.11603	SLC35B4	solute carrier family 35, member B4	0.461362
axo15086-r_at	2.5e-06	1.89e-07	-16.3565	7.49169	-1.11554	TIPARP	TCDD-inducible poly(ADP-ribose) polymerase	0.461518
axo10520-f_at	1.19e-05	1.46e-06	-12.573	5.23721	-1.11437	KIF23	kinesin family member 23 isoform 2	0.461894
axo02043-f_at	5.36e-06	5.2e-07	-14.3667	6.3764	-1.11429	NR4A1	nuclear receptor subfamily 4, group A, member 1	0.461918
axo18296-f_at	2.45e-06	1.84e-07	-16.4155	7.52273	-1.11367	TNN	tenascin N	0.462119
axo18975-f_at	1.2e-06	7e-08	-18.5681	8.58575	-1.11344	SNIP1	Smad nuclear interacting protein	0.462189
axo15384-f_at	2.52e-06	1.91e-07	-16.3353	7.4805	-1.11315	MRPL4	mitochondrial ribosomal protein L4 isoform a	0.462284
axo18984-r_at	1.13e-06	6.37e-08	-18.7931	8.68973	-1.11065	C15orf29	hypothetical protein LOC79768	0.463085
axo09794-f_at	1.75e-06	1.18e-07	-17.3707	8.01043	-1.11029	HSPA9	heat shock 70kDa protein 9 precursor	0.463202
axo09862-f_at	7.12e-06	7.59e-07	-13.6808	5.95738	-1.10979	STK17B	serine/threonine kinase 17b	0.46336
axo18348-f_at	4.88e-06	4.59e-07	-14.598	6.51336	-1.10953	RRAGC	Ras-related GTP binding C	0.463444
axo03050-f_at	9.21e-07	4.81e-08	-19.4772	8.99836	-1.10907	AURKA	serine/threonine protein kinase 6	0.463593
axo14063-f_at	8.72e-06	9.81e-07	-13.2351	5.67441	-1.1083	MTSS1	metastasis suppressor 1	0.463841
axo00679-f_at	1.29e-05	1.62e-06	-12.3972	5.11752	-1.10363	JOSD2	Josephin domain containing 2	0.465343
axo20630-f_s_at	0.000196	4.68e-05	-7.90168	1.39297	-1.10342	NASP	nuclear autoantigenic sperm protein isoform 2	0.465411
axo01242-f_at	5.11e-05	9.17e-06	-9.86455	3.19813	-1.10056	B3GNT7	UDP-GlcNAc:betaGal beta-1,3-N-acetylglucosaminyltransferase 7	0.466335
axo21334-f_at	7.74e-06	8.44e-07	-13.4958	5.84101	-1.10002	HIATL1	hippocampus abundant transcript-like 1	0.466511
axo04238-f_at	1.07e-05	1.28e-06	-12.7877	5.38129	-1.10001	CCDC112	coiled-coil domain containing 112 isoform 1	0.466512
axo05194-r_at	4.05e-07	1.41e-08	-22.7408	10.3342	-1.0976	SNX18	sorting nexin 18 isoform a	0.467292
axo19105-f_at	1.33e-06	8.07e-08	-18.2362	8.43006	-1.09595	GRHL2	transcription factor CP2-like 3	0.467828
axo08954-f_at	5.22e-06	5.01e-07	-14.434	6.41647	-1.09453	TFAP2C	transcription factor AP-2 gamma	0.468289
axo16439-r_at	1.5e-06	9.54e-08	-17.8524	8.24644	-1.09425	EPN3	epsin 3	0.468379
axo08208-f_at	2.04e-05	2.95e-06	-11.4656	4.45619	-1.09292	MSX2	msh homeobox 2	0.468812
axo08484-f_at	3.11e-05	4.96e-06	-10.7034	3.87798	-1.09257	PRKCZ	protein kinase C, zeta isoform 1	0.468925
axo11001-f_at	1.82e-06	1.25e-07	-17.2512	7.95088	-1.0923	HSP90AA1	heat shock 90kDa protein 1, alpha isoform 2	0.469013
axo00457-r_at	5.38e-07	2.11e-08	-21.6231	9.90011	-1.09203	MXI1	MAX interactor 1 isoform b	0.469102
axo10407-r_at	8.36e-07	4.19e-08	-19.8179	9.14806	-1.09058	NOLC1	nucleolar and coiled-body phosphoprotein 1	0.469574
axo03332-f_at	2.1e-06	1.51e-07	-16.8357	7.74058	-1.09051	PPHLN1	periphilin 1 isoform 4	0.469594
axo04561-f_at	0.000312	8.13e-05	-7.31427	0.783183	-1.09023	SFRS1	splicing factor, arginine/serine-rich 1 isoform 2	0.469687
axo01214-f_at	3.79e-06	3.29e-07	-15.236	6.88082	-1.09019	SDR42E1	short chain dehydrogenase/reductase family 42E, member 1	0.469701
axo19595-f_at	5.68e-06	5.61e-07	-14.2265	6.2923	-1.0882	FAM103A1	hypothetical protein LOC83640	0.470349
axo17089-f_at	2.13e-06	1.53e-07	-16.8058	7.72527	-1.08777	NANS	N-acetylneuraminic acid phosphate synthase	0.470487
axo03836-f_at	4.49e-05	7.84e-06	-10.0722	3.37096	-1.08684	LOC100131068	PREDICTED: hypothetical protein	0.470791
axo10425-f_s_at	6.35e-06	6.55e-07	-13.9441	6.12056	-1.08669	COPB2	coatomer protein complex, subunit beta 2 (beta prime)	0.470841
axo00370-r_at	6.37e-07	2.73e-08	-20.9245	9.61691	-1.08491	WFDC3	WAP four-disulfide core domain 3 precursor	0.471423
axo19935-f_at	5.85e-06	5.85e-07	-14.1493	6.24564	-1.08384	HMBS	hydroxymethylbilane synthase isoform 2	0.471772
axo06589-f_at	1.5e-06	9.64e-08	-17.8293	8.23526	-1.08361	WEE1	WEE1 tyrosine kinase isoform 2	0.471847
axo12605-f_at	7.06e-05	1.36e-05	-9.35398	2.75948	-1.08359	ADAMTS1	ADAM metallopeptidase with thrombospondin type 1 motif, 1 preproprotein	0.471855
axo19294-f_at	2.1e-05	3.05e-06	-11.4141	4.41821	-1.08132	TRIB1	G-protein-coupled receptor induced protein	0.472597
axo18012-f_at	5.57e-06	5.46e-07	-14.2764	6.32233	-1.0801	COL14A1	collagen, type XIV, alpha 1	0.472997
axo06566-f_at	7.27e-05	1.41e-05	-9.30764	2.71867	-1.07948	EPX	eosinophil peroxidase	0.473198
axo08500-r_at	4.11e-06	3.67e-07	-15.0257	6.76139	-1.0785	CHMP1A	chromatin modifying protein 1A isoform 2	0.47352
axo12023-f_at	6.8e-06	7.14e-07	-13.7899	6.02537	-1.0782	CIB1	calcium and integrin binding 1	0.47362
axo01779-r_at	1.23e-05	1.52e-06	-12.5054	5.19135	-1.07791	TMEM92	transmembrane protein 92	0.473715
axo11152-f_at	2.86e-06	2.27e-07	-15.9819	7.29208	-1.07731	CALHM1	calcium homeostasis modulator 1	0.473911
axo03123-f_at	6.7e-07	3.01e-08	-20.6649	9.50923	-1.07608	GJB7	gap junction protein, beta 7, 25kDa	0.474316
axo15655-f_at	8.23e-07	4.08e-08	-19.8859	9.17765	-1.0758	YTHDF2	high glucose-regulated protein 8	0.474406
axo15718-f_at	8.58e-06	9.59e-07	-13.2734	5.69907	-1.07528	HERC5	hect domain and RLD 5	0.47458
axo15347-f_at	1.22e-05	1.51e-06	-12.5081	5.19318	-1.07495	NBAS	neuroblastoma-amplified protein	0.474688
axo15804-f_at	0.000124	2.7e-05	-8.52474	2.00229	-1.07394	CUL4A	cullin 4A isoform 1	0.475022
axo21080-f_at	5.26e-05	9.53e-06	-9.81339	3.15506	-1.07217	RRS1	homolog of yeast ribosome biogenesis regulatory protein RRS1	0.475601
axo20072-r_at	0.000129	2.85e-05	-8.46057	1.94122	-1.07181	MPV17L2	MPV17 mitochondrial membrane protein-like 2	0.475723
axo18486-r_at	2.66e-06	2.05e-07	-16.1874	7.40215	-1.07101	ELOVL4	elongation of very long chain fatty acids-like 4	0.475985
axo01051-f_at	1.77e-05	2.43e-06	-11.756	4.66739	-1.0707	FAM76B	hypothetical protein LOC143684	0.476089
axo11083-f_at	4.22e-06	3.79e-07	-14.9641	6.72609	-1.07033	ARHGEF5	rho guanine nucleotide exchange factor 5	0.476209
axo03112-r_at	0.00147	0.000501	-5.60553	-1.21683	-1.07031	MIA3	melanoma inhibitory activity family, member 3	0.476218
axo18686-f_at	1.33e-06	8.03e-08	-18.2482	8.43572	-1.06972		spermatogenesis associated 5-like 1	0.47641
axo19766-f_at	1.87e-06	1.3e-07	-17.1687	7.90949	-1.06871	WDR75	WD repeat domain 75	0.476746
axo00797-r_at	7.91e-07	3.83e-08	-20.044	9.246	-1.06832	BCL2L1	BCL2-like 1 isoform 1	0.476875
axo04493-r_at	6.81e-07	3.12e-08	-20.5731	9.4708	-1.06823	MYH14	myosin, heavy chain 14 isoform 1	0.476903
axo04848-f_at	1.06e-05	1.26e-06	-12.8087	5.39524	-1.0672	C1orf116	specifically androgen-regulated protein isoform 2	0.477244
axo08776-f_at	3.26e-06	2.71e-07	-15.6241	7.09718	-1.06695	ST8SIA1	alpha-2,8-sialyltransferase 1	0.477326
axo08549-f_at	6.09e-07	2.57e-08	-21.0826	9.68182	-1.06665	PTBP1	polypyrimidine tract-binding protein 1 isoform a	0.477425
axo20287-r_at	1.05e-05	1.25e-06	-12.8306	5.4098	-1.06607	PNPT1	polyribonucleotide nucleotidyltransferase 1	0.477618
axo02895-f_at	0.0134	0.00625	-3.67222	-3.94896	-1.065	OTOF	otoferlin isoform a	0.477974
axo09360-r_at	0.000104	2.19e-05	-8.76996	2.23231	-1.06499	BCAS1	breast carcinoma amplified sequence 1	0.477976
axo13745-f_at	6.83e-07	3.13e-08	-20.5638	9.46691	-1.06442	DAPP1	dual adaptor of phosphotyrosine and 3-phosphoinositides	0.478166
axo03971-r_at	3.56e-06	3.02e-07	-15.4042	6.97523	-1.06229	LOC100128274	PREDICTED: hypothetical protein	0.478872
axo06766-f_at	1.48e-06	9.38e-08	-17.8906	8.26492	-1.06229	HOXA13	homeobox A13	0.478872
axo10990-f_at	6.7e-07	3.02e-08	-20.6628	9.50834	-1.06202	CPOX	coproporphyrinogen oxidase	0.47896
axo07575-r_at	7.47e-07	3.54e-08	-20.2491	9.33382	-1.06175	CCND2	cyclin D2	0.479052
axo10620-f_at	1.04e-06	5.65e-08	-19.0833	8.822	-1.06164	FUS	fusion (involved in t(12;16) in malignant liposarcoma)	0.479086
axo10051-f_at	1.32e-06	7.96e-08	-18.2681	8.44511	-1.06093	DUSP1	dual specificity phosphatase 1	0.479324
axo19107-r_at	1e-06	5.38e-08	-19.2024	8.87569	-1.0609	ERMAP	erythroblast membrane-associated protein precursor	0.479333
axo08282-f_at	7.51e-05	1.47e-05	-9.25605	2.67303	-1.06085	NGFR	nerve growth factor receptor precursor	0.479349
axo15512-f_at	6.25e-06	6.39e-07	-13.991	6.14929	-1.06058	GINS2	DNA replication complex GINS protein PSF2	0.47944
axo12581-f_at	5.59e-07	2.27e-08	-21.4229	9.81991	-1.05986	UPK3A	uroplakin 3A precursor	0.479677
axo06712-f_at	2.43e-06	1.82e-07	-16.4401	7.53561	-1.0596	GPN1	GPN-loop GTPase 1 isoform d	0.479764
axo08491-f_at	1.7e-06	1.14e-07	-17.4598	8.05458	-1.05943	MAPK13	mitogen-activated protein kinase 13	0.479823
axo19101-r_at	1.07e-06	5.91e-08	-18.9744	8.77261	-1.05834	DENND2D	DENN/MADD domain containing 2D	0.480184
axo08258-f_at	2.07e-06	1.47e-07	-16.8962	7.77154	-1.05665	NASP	nuclear autoantigenic sperm protein isoform 2	0.480747
axo11819-f_at	3.93e-06	3.46e-07	-15.1419	6.82759	-1.05594	PCSK5	proprotein convertase subtilisin/kexin type 5 preproprotein	0.480985
axo19535-f_at	1.92e-05	2.7e-06	-11.5949	4.55082	-1.05561	ADPGK	ADP-dependent glucokinase	0.481094
axo11071-f_at	8.84e-06	1e-06	-13.2026	5.65341	-1.05555	TFF2	trefoil factor 2 precursor	0.481114
axo12194-f_at	4.29e-05	7.4e-06	-10.1497	3.43471	-1.05523	IGF2BP1	insulin-like growth factor 2 mRNA binding protein 1	0.481219
axo13442-r_at	4.97e-05	8.84e-06	-9.91228	3.23813	-1.05456	SACM1L	suppressor of actin 1	0.481445
axo16970-f_at	1.8e-06	1.23e-07	-17.276	7.96324	-1.05443	TMEM44	transmembrane protein 44 isoform b	0.481489
axo08791-r_at	9.47e-07	4.97e-08	-19.397	8.96275	-1.05438	SLC16A1	solute carrier family 16, member 1	0.481505
axo07858-f_at	6.5e-07	2.86e-08	-20.8055	9.56772	-1.0542	GBP1	guanylate binding protein 1, interferon-inducible, 67kDa	0.481565
axo08359-f_at	1.21e-05	1.5e-06	-12.5285	5.20707	-1.0531	PDE6D	phosphodiesterase 6D, cGMP-specific, rod, delta	0.481931
axo09136-r_at	1.98e-05	2.81e-06	-11.5345	4.50673	-1.0508	ZIC1	zinc finger protein of the cerebellum 1	0.482699
axo06887-f_at	3.09e-06	2.53e-07	-15.7614	7.1725	-1.05044	PARP9	poly (ADP-ribose) polymerase family, member 9 isoform c	0.482821
axo12863-f_at	2.21e-05	3.25e-06	-11.3196	4.34811	-1.04818	KIF22	kinesin family member 22	0.483576
axo08896-f_at	1.13e-06	6.38e-08	-18.7891	8.68788	-1.04813	RPS6KB1	ribosomal protein S6 kinase, 70kDa, polypeptide 1	0.483595
axo12770-f_at	7.09e-06	7.56e-07	-13.6895	5.96283	-1.04709	WIF1	WNT inhibitory factor 1 precursor	0.483944
axo08170-f_at	0.00237	0.000868	-5.14698	-1.81812	-1.04647	MGAT5	N-acetylglucosaminyltransferase V	0.484153
axo04267-r_at	1.24e-05	1.54e-06	-12.4858	5.17802	-1.04352	INCENP	inner centromere protein antigens 135/155kDa isoform 1	0.485144
axo02936-r_at	1.28e-05	1.61e-06	-12.4092	5.12571	-1.04302	LBR	lamin B receptor	0.485311
axo09016-f_at	5.04e-05	9.01e-06	-9.88681	3.2168	-1.04284	TPD52L2	tumor protein D52-like 2 isoform e	0.485372
axo08825-f_at	2.72e-05	4.21e-06	-10.9407	4.06183	-1.04228	SNRPA1	small nuclear ribonucleoprotein polypeptide A'	0.485558
axo14972-f_at	0.00094	0.000299	-6.05921	-0.650092	-1.0404	NIPBL	delangin isoform B	0.486193
axo06423-f_at	8.17e-05	1.64e-05	-9.12419	2.55542	-1.03895	NEDD9	neural precursor cell expressed, developmentally down-regulated 9 isoform 3	0.486682
axo05295-f_at	0.000345	9.17e-05	-7.19041	0.649913	-1.03675	FLNA	filamin A, alpha isoform 2	0.487425
axo12463-f_at	8.12e-07	4e-08	-19.9363	9.19948	-1.03596		EBNA1 binding protein 2	0.487691
axo15069-r_at	9.21e-07	4.81e-08	-19.4766	8.9981	-1.03424	KBTBD2	kelch repeat and BTB (POZ) domain containing 2	0.488273
axo19249-f_at	5.9e-06	5.92e-07	-14.1292	6.2335	-1.03421	KIAA2026	hypothetical protein LOC158358	0.488284
axo19652-f_at	6e-07	2.51e-08	-21.1486	9.7088	-1.03387	SYT16	synaptotagmin XIV-like	0.488397
axo07930-r_at	9.95e-06	1.16e-06	-12.9484	5.48761	-1.03383	RBMX	RNA binding motif protein, X-linked	0.488411
axo19415-f_at	7.44e-05	1.46e-05	-9.26971	2.68514	-1.03371	ITFG1	integrin alpha FG-GAP repeat containing 1	0.488452
axo05285-f_at	4.57e-06	4.23e-07	-14.7527	6.6039	-1.03356	C6orf136	hypothetical protein LOC221545 isoform 1	0.488504
axo00349-f_at	1.49e-06	9.45e-08	-17.8728	8.25632	-1.03197	SDCBP2	syndecan binding protein 2 isoform a	0.48904
axo11058-f_at	1.44e-06	9.05e-08	-17.971	8.30359	-1.02926	SLC20A1	solute carrier family 20 (phosphate transporter), member 1	0.489961
axo18518-f_at	2.08e-05	3.01e-06	-11.4354	4.43396	-1.02914	PARP12	zinc finger CCCH-type domain containing 1	0.490003
axo19314-f_at	7.74e-07	3.69e-08	-20.1414	9.28782	-1.02909	REEP4	receptor accessory protein 4	0.49002
axo09660-f_at	3.99e-05	6.74e-06	-10.2781	3.53935	-1.02846	WASL	Wiskott-Aldrich syndrome gene-like protein	0.490232
axo18637-r_at	0.00029	7.45e-05	-7.40505	0.879795	-1.02831	SPATS2	spermatogenesis associated, serine-rich 2	0.490285
axo16327-r_at	1.93e-05	2.73e-06	-11.5815	4.54102	-1.02791	TMEM127	transmembrane protein 127	0.490419
axo09094-f_at	0.000442	0.000123	-6.89734	0.327744	-1.02756	VASP	vasodilator-stimulated phosphoprotein	0.490539
axo07048-f_at	9.54e-07	5.04e-08	-19.3599	8.94622	-1.02521	CDC20	cell division cycle 20	0.491339
axo10181-r_at	9.71e-07	5.15e-08	-19.3087	8.92335	-1.02325	NARS	asparaginyl-tRNA synthetase	0.492007
axo12620-r_at	5.95e-06	5.98e-07	-14.1098	6.22171	-1.02321	TLE4	transducin-like enhancer protein 4	0.49202
axo08501-f_at	1.88e-06	1.3e-07	-17.1556	7.90293	-1.02181	HTRA1	HtrA serine peptidase 1 precursor	0.492497
axo11479-r_at	3.74e-05	6.23e-06	-10.3854	3.62592	-1.02092	KATNB1	katanin p80 subunit B 1	0.492801
axo00317-f_at	1.02e-06	5.47e-08	-19.1604	8.85682	-1.02009	DNAJB6	DnaJ (Hsp40) homolog, subfamily B, member 6 isoform a	0.493086
axo16088-f_at	1.51e-05	2e-06	-12.0624	4.88524	-1.01869	DONSON	downstream neighbor of SON	0.493565
axo11244-f_at	7.99e-06	8.81e-07	-13.4199	5.79283	-1.01817	VAMP7	vesicle-associated membrane protein 7 isoform 1	0.493742
axo02357-f_at	5.43e-06	5.29e-07	-14.3357	6.35785	-1.01805	ANKRD43	ankyrin repeat domain 43	0.493784
axo10395-f_at	1.31e-06	7.87e-08	-18.2957	8.45817	-1.01628	ETF1	eukaryotic translation termination factor 1	0.49439
axo00325-r_at	3.79e-06	3.29e-07	-15.2367	6.88124	-1.01627	PUF60	poly-U binding splicing factor 60KDa isoform a	0.494391
axo15755-f_s_at	0.00104	0.000337	-5.95041	-0.78351	-1.01617	DSP	desmoplakin isoform II	0.494427
axo03347-r_at	1.55e-06	1.01e-07	-17.7294	8.18678	-1.01604	CDC25A	cell division cycle 25A isoform b	0.494471
axo16345-f_at	4.41e-06	4.02e-07	-14.8502	6.66044	-1.01535	CPSF3L	cleavage and polyadenylation specific factor 3-like	0.494708
axo11380-f_at	1.5e-06	9.59e-08	-17.8408	8.24082	-1.01527	SORBS3	sorbin and SH3 domain containing 3 isoform 1	0.494735
axo05309-r_at	2.92e-05	4.56e-06	-10.8229	3.97099	-1.0149	DDX54	DEAD (Asp-Glu-Ala-Asp) box polypeptide 54 isoform 1	0.494863
axo01989-f_at	0.000528	0.000151	-6.69304	0.097286	-1.01463	CAMK2D	calcium/calmodulin-dependent protein kinase II delta isoform 1	0.494955
axo19896-f_at	1.44e-06	9.01e-08	-17.9826	8.30918	-1.01413	C3orf26	hypothetical protein LOC84319	0.495128
axo17550-f_at	7.35e-05	1.43e-05	-9.28971	2.70284	-1.01364	DDX24	DEAD (Asp-Glu-Ala-Asp) box polypeptide 24	0.495294
axo16547-r_at	0.00179	0.000628	-5.41335	-1.46529	-1.01321	FAM102B	hypothetical protein LOC284611	0.495441
axo07559-r_at	1.71e-05	2.34e-06	-11.8155	4.71008	-1.01278	CALB2	calbindin 2 isoform 1	0.495592
axo13774-f_at	1.45e-06	9.14e-08	-17.949	8.29303	-1.0122	ARHGEF16	Rho guanine exchange factor 16	0.49579
axo02466-f_at	1.94e-06	1.36e-07	-17.0636	7.85658	-1.01184	OTOP2	otopetrin 2	0.495912
axo18263-f_at	1.11e-06	6.25e-08	-18.8386	8.71061	-1.01162	MTBP	Mdm2, transformed 3T3 cell double minute 2, p53 binding protein binding protein	0.495989
axo12579-f_at	1.65e-06	1.09e-07	-17.5537	8.10083	-1.01134	UPK1B	uroplakin 1B	0.496086
axo12749-f_at	2.8e-06	2.19e-07	-16.0528	7.33021	-1.01076	MAD2L1BP	MAD2L1 binding protein isoform 1	0.496284
axo15912-f_at	0.000511	0.000146	-6.73129	0.140801	-1.01049	MEX3C	ring finger and KH domain containing 2	0.496379
axo17080-f_at	1.84e-06	1.26e-07	-17.225	7.93775	-1.0092	NAT12	N-acetyltransferase 12	0.49682
axo15848-f_at	2.25e-06	1.64e-07	-16.6536	7.64684	-1.00861	UBAP1	ubiquitin associated protein 1	0.497026
axo00417-f_s_at	6.4e-07	2.78e-08	-20.8814	9.59914	-1.00764	SRrp35	serine-arginine repressor protein	0.497357
axo13557-f_at	3.82e-05	6.4e-06	-10.3487	3.5964	-1.00747	PKP1	plakophilin 1 isoform 1a	0.497418
axo09856-f_at	6.75e-07	3.06e-08	-20.6214	9.49103	-1.00743	AURKB	aurora kinase B	0.497432
axo04262-r_at	0.000225	5.52e-05	-7.72151	1.20974	-1.00719	PPAN-P2RY11	PPAN-P2RY11 protein	0.497514
axo12699-f_at	0.02	0.00983	-3.36343	-4.4289	-1.00645	TCHH	trichohyalin	0.497768
axo06665-r_at	6.44e-07	2.8e-08	-20.8587	9.58975	-1.00629	MX1	myxovirus resistance protein 1	0.497826
axo14488-f_at	3.54e-05	5.82e-06	-10.4791	3.70094	-1.00563	PPRC1	peroxisome proliferator-activated receptor gamma, coactivator-related 1	0.498051
axo14132-f_at	4.85e-05	8.57e-06	-9.95332	3.2724	-1.00523	KIAA0649	1A6/DRIM (down-regulated in metastasis) interacting protein	0.49819
axo12092-r_at	1.9e-05	2.67e-06	-11.6135	4.56436	-1.0042	DRAP1	DR1-associated protein 1	0.498545
axo12746-f_at	4.3e-05	7.42e-06	-10.1461	3.43175	-1.00298	TESK2	testis-specific protein kinase 2	0.498968
axo11974-f_at	2.32e-06	1.71e-07	-16.5683	7.60257	-1.00126	RBM14	RNA binding motif protein 14	0.499565
axo18539-f_at	3.52e-06	2.98e-07	-15.4301	6.9897	-1.00114	CERK	ceramide kinase	0.499606
axo13970-r_at	3.72e-06	3.22e-07	-15.2826	6.90707	-1.0011	CLINT1	epsin 4	0.49962
axo04836-f_at	0.000145	3.27e-05	-8.30186	1.78853	-1.00062	MYO3B	myosin IIIB isoform 1	0.499784
axo18736-f_at	9.59e-05	1.98e-05	-8.88993	2.34293	-1.00048	MMP28	matrix metalloproteinase 28 isoform 1 preproprotein	0.499833
axo10165-f_at	9.63e-07	5.1e-08	-19.3332	8.93431	-1.00047	KIF11	kinesin family member 11	0.499837
axo13990-f_at	1.25e-05	1.56e-06	-12.4626	5.16219	-0.999633	HERPUD1	homocysteine-inducible, endoplasmic reticulum stress-inducible, ubiquitin-like domain member 1 isoform 1	0.500127
axo09440-f_at	2.09e-06	1.49e-07	-16.8597	7.75288	-0.998399	SOCS1	suppressor of cytokine signaling 1	0.500555
axo10890-f_at	0.000437	0.000121	-6.91144	0.343473	-0.997419	DLX6	distal-less homeobox 6	0.500895
axo04623-r_at	0.000239	5.93e-05	-7.64531	1.13125	-0.99719	GPR64	G protein-coupled receptor 64 isoform 3	0.500975
axo09299-f_at	1.31e-06	7.94e-08	-18.2742	8.44799	-0.996971	RAE1	RAE1 (RNA export 1, S.pombe) homolog	0.501051
axo20139-r_at	5.95e-06	5.98e-07	-14.1093	6.22138	-0.996739	CIRH1A	cirhin	0.501131
axo09381-f_at	5.68e-06	5.61e-07	-14.2265	6.29232	-0.996407	YARS	tyrosyl-tRNA synthetase	0.501247
axo13640-f_at	2.18e-05	3.19e-06	-11.3461	4.36785	-0.996236	CAPN7	calpain 7	0.501306
axo17085-f_at	2.49e-05	3.77e-06	-11.0998	4.18309	-0.995704	C21orf45	chromosome 21 open reading frame 45	0.501491
axo14150-f_at	1.33e-06	8.06e-08	-18.2402	8.43192	-0.995561	ZC3H11A	zinc finger CCCH-type containing 11A	0.501541
axo07495-f_at	7.88e-07	3.8e-08	-20.069	9.25675	-0.995429	ATP1B2	Na+/K+ -ATPase beta 2 subunit	0.501587
axo11057-r_at	3.07e-06	2.5e-07	-15.7823	7.18389	-0.99532	SHMT2	serine hydroxymethyltransferase 2 (mitochondrial)	0.501625
axo17966-f_at	1.07e-06	5.96e-08	-18.9533	8.76299	-0.995232	ZNFX1	zinc finger, NFX1-type containing 1	0.501655
axo07145-f_at	3.36e-06	2.81e-07	-15.5527	7.05781	-0.994427	DHX15	DEAH (Asp-Glu-Ala-His) box polypeptide 15	0.501935
axo20613-f_at	4.58e-05	8.02e-06	-10.0428	3.34668	-0.994042	ID2	inhibitor of DNA binding 2	0.502069
axo02299-f_at	1.21e-06	7.05e-08	-18.5509	8.57774	-0.993663	PCSK9	proprotein convertase subtilisin/kexin type 9 preproprotein	0.502201
axo10649-f_at	6.28e-05	1.18e-05	-9.53951	2.92118	-0.993297	MARS	methionyl-tRNA synthetase	0.502328
axo07587-r_at	2.25e-06	1.65e-07	-16.6469	7.64335	-0.993029	CDC2	cell division cycle 2 isoform 1	0.502422
axo05735-f_at	2.19e-06	1.58e-07	-16.7338	7.68824	-0.992935	RRAD	Ras-related associated with diabetes	0.502455
axo11730-f_at	0.000103	2.17e-05	-8.78101	2.24255	-0.991833	PRMT5	protein arginine methyltransferase 5 isoform a	0.502838
axo03136-f_at	1.31e-06	7.91e-08	-18.2838	8.45253	-0.990119		sulfatase 2 isoform b precursor	0.503436
axo09280-r_at	4.61e-05	8.09e-06	-10.0301	3.33619	-0.989817	CUL1	cullin 1	0.503542
axo04977-f_at	1.03e-06	5.54e-08	-19.1284	8.84237	-0.989572	C14orf109	hypothetical protein LOC26175 isoform 1	0.503627
axo18315-f_at	1.06e-05	1.26e-06	-12.8069	5.39405	-0.989292	CARS	cysteinyl-tRNA synthetase isoform c	0.503725
axo19084-r_at	2.58e-06	1.98e-07	-16.2648	7.44327	-0.988366	MRM1	mitochondrial rRNA methyltransferase 1 homolog	0.504048
axo16010-f_at	1.85e-05	2.57e-06	-11.6748	4.60882	-0.987305	XAF1	XIAP associated factor 1 isoform 1	0.504419
axo12842-r_at	3.61e-06	3.08e-07	-15.369	6.95557	-0.987107	EMD	emerin	0.504488
axo07603-f_at	0.000137	3.05e-05	-8.38167	1.8656	-0.985447	CDK7	cyclin-dependent kinase 7	0.505069
axo03392-f_at	4.96e-06	4.69e-07	-14.5584	6.49006	-0.984599	ZRANB2	zinc finger protein 265 isoform 1	0.505366
axo09594-f_at	0.0015	0.000513	-5.58456	-1.24369	-0.984375	FCGBP	Fc fragment of IgG binding protein	0.505445
axo16702-f_at	1.33e-06	8.09e-08	-18.2314	8.42776	-0.984171	LRRC1	leucine rich repeat containing 1	0.505516
axo20241-f_at	1.07e-06	5.96e-08	-18.9547	8.76364	-0.982355	SEC23B	Sec23 homolog B	0.506153
axo00208-f_at	3.83e-06	3.35e-07	-15.2054	6.86357	-0.982333	RBP7	retinol binding protein 7, cellular	0.50616
axo18041-r_at	0.000744	0.000228	-6.30601	-0.353091	-0.980608	CCNO	cyclin domain containing	0.506766
axo14333-f_at	8.36e-05	1.69e-05	-9.08708	2.52206	-0.97978	DAAM1	dishevelled-associated activator of morphogenesis 1	0.507057
axo16879-f_at	1.14e-06	6.46e-08	-18.759	8.67402	-0.979349	SLC35C1	GDP-fucose transporter 1 isoform a	0.507208
axo06760-f_at	6.28e-06	6.43e-07	-13.9791	6.14201	-0.978401	LRTOMT	leucine rich transmembrane and 0-methyltransferase domain containing isoform 6	0.507542
axo09634-f_at	1.56e-06	1.01e-07	-17.7192	8.18184	-0.978289	BCL10	B-cell CLL/lymphoma 10	0.507581
axo13156-f_at	7.07e-06	7.52e-07	-13.6973	5.96773	-0.977087	TSPAN15	transmembrane 4 superfamily member 15	0.508005
axo00159-f_at	3.06e-05	4.87e-06	-10.7307	3.89935	-0.976529	LARP4	c-Mpl binding protein isoform a	0.508201
axo06773-f_at	9.42e-07	4.92e-08	-19.4181	8.97213	-0.976016	OTUD1	OTU domain containing 1	0.508382
axo06555-r_at	7.37e-05	1.44e-05	-9.28532	2.69895	-0.975865	MAPRE2	microtubule-associated protein, RP/EB family, member 2 isoform 3	0.508435
axo08914-f_at	0.000188	4.46e-05	-7.9552	1.44677	-0.974884	SUV39H1	suppressor of variegation 3-9 homolog 1	0.508781
axo06433-f_at	6e-06	6.03e-07	-14.0938	6.21197	-0.974205	GPT2	glutamic pyruvate transaminase 2 isoform 2	0.50902
axo05825-f_at	1.54e-06	9.91e-08	-17.765	8.2041	-0.973411	VWA5A	BCSC-1 isoform 1	0.5093
axo19008-f_at	0.000362	9.71e-05	-7.13262	0.587153	-0.973104	SHCBP1	SHC SH2-domain binding protein 1	0.509409
axo12178-r_at	0.000136	3.03e-05	-8.38991	1.87352	-0.972905	ELL	elongation factor RNA polymerase II	0.509479
axo12829-f_at	1.57e-06	1.02e-07	-17.6949	8.16998	-0.972164	GPN1	GPN-loop GTPase 1 isoform a	0.509741
axo13677-f_at	5.49e-05	1e-05	-9.74791	3.09965	-0.972149	IL17RA	interleukin 17A receptor precursor	0.509746
axo01769-f_at	4.16e-05	7.13e-06	-10.2016	3.47716	-0.971055	TMPO	thymopoietin isoform beta	0.510133
axo06309-r_at	1.35e-06	8.25e-08	-18.1856	8.40608	-0.970315	FASTKD2	FAST kinase domains 2	0.510395
axo03275-f_at	5.36e-06	5.18e-07	-14.373	6.38011	-0.970314	TPD52L2	tumor protein D52-like 2 isoform c	0.510395
axo11379-r_at	3.5e-06	2.96e-07	-15.4481	6.99975	-0.970195	SORBS3	sorbin and SH3 domain containing 3 isoform 1	0.510437
axo04392-f_at	9.29e-06	1.06e-06	-13.0949	5.58356	-0.970168	PVRL2	poliovirus receptor related 2 isoform delta precursor	0.510447
axo12608-f_at	5.45e-06	5.33e-07	-14.3213	6.34924	-0.969735	NPM3	nucleophosmin/nucleoplasmin 3	0.5106
axo01679-f_at	3.05e-05	4.84e-06	-10.7397	3.90636	-0.968975	YTHDF3	YTH domain family, member 3	0.510869
axo10257-r_at	1.29e-06	7.65e-08	-18.3618	8.4893	-0.968738	SNRPA	small nuclear ribonucleoprotein polypeptide A	0.510953
axo15318-f_at	8.32e-06	9.24e-07	-13.337	5.73991	-0.967659	UMOD	uromodulin precursor	0.511335
axo12364-r_at	5.83e-06	5.82e-07	-14.16	6.25214	-0.967485	HIVEP2	human immunodeficiency virus type I enhancer binding protein 2	0.511397
axo20256-f_at	2.79e-05	4.32e-06	-10.9016	4.03179	-0.967145	CSRNP1	AXIN1 up-regulated 1	0.511517
axo10712-f_at	1.27e-05	1.58e-06	-12.4357	5.14385	-0.9671	PRKX	protein kinase, X-linked	0.511533
axo15463-r_at	1.67e-06	1.1e-07	-17.5252	8.08681	-0.966181	DERL2	Der1-like domain family, member 2	0.511859
axo08945-f_at	4.36e-05	7.55e-06	-10.1236	3.41327	-0.966118	TDG	thymine-DNA glycosylase	0.511881
axo14953-f_at	3.79e-05	6.33e-06	-10.3631	3.60802	-0.965695	SKIV2L2	superkiller viralicidic activity 2-like 2	0.512032
axo00311-f_at	6.07e-06	6.13e-07	-14.0645	6.19419	-0.965505	U2AF1	U2 small nuclear RNA auxillary factor 1 isoform b	0.512099
axo08371-f_at	5.63e-05	1.03e-05	-9.7062	3.06419	-0.965418	CFP	complement factor properdin precursor	0.51213
axo14639-f_at	0.00064	0.000191	-6.47325	-0.156225	-0.964457	ZNF182	zinc finger protein 21 isoform 2	0.512471
axo13639-f_at	0.0114	0.00516	-3.80597	-3.7441	-0.963591	TRAM1	translocation associated membrane protein 1	0.512779
axo00511-f_at	0.000179	4.21e-05	-8.01948	1.51102	-0.963475	WIPF2	WIRE protein	0.51282
axo08168-f_at	2.98e-06	2.4e-07	-15.8667	7.22982	-0.963438	MGAT2	mannosyl (alpha-1,6-)-glycoprotein beta-1,2-N-acetylglucosaminyltransferase	0.512833
axo09508-r_at	1.71e-05	2.34e-06	-11.8205	4.71371	-0.961547	RNGTT	RNA guanylyltransferase and 5'-phosphatase	0.513506
axo06635-f_at	0.00144	0.000491	-5.62263	-1.19497	-0.961402	DST	dystonin isoform 4	0.513557
axo15751-r_at	5.04e-06	4.79e-07	-14.5184	6.46649	-0.96055	LIMA1	LIM domain and actin binding 1 isoform b	0.513861
axo09812-f_at	1.26e-05	1.57e-06	-12.4542	5.15648	-0.958801	RAB1A	RAB1A, member RAS oncogene family isoform 1	0.514484
axo16407-f_at	0.00034	9e-05	-7.2097	0.670779	-0.958272	PRPF39	PRP39 pre-mRNA processing factor 39 homolog	0.514673
axo15736-f_at	9.63e-06	1.11e-06	-13.0174	5.53297	-0.957992	RAPGEF6	PDZ domain-containing guanine nucleotide exchange factor I	0.514773
axo14792-f_at	1.3e-06	7.74e-08	-18.3338	8.4761	-0.95773	NUP160	nucleoporin 160kDa	0.514866
axo07935-r_at	0.000341	9.02e-05	-7.20761	0.668527	-0.957454	HNRNPK	heterogeneous nuclear ribonucleoprotein K isoform a	0.514965
axo12097-f_at	0.000788	0.000243	-6.24536	-0.425354	-0.957303	SMC2	structural maintenance of chromosomes 2	0.515019
axo04272-f_at	0.000232	5.74e-05	-7.67948	1.16651	-0.956468	ALAD	delta-aminolevulinic acid dehydratase	0.515317
axo05833-f_at	3.83e-06	3.34e-07	-15.2077	6.86486	-0.95556	G6PD	glucose-6-phosphate dehydrogenase isoform a	0.515642
axo17413-r_at	3.94e-06	3.47e-07	-15.1352	6.82375	-0.953448	C5orf15	keratinocytes associated transmembrane protein 2	0.516397
axo18866-r_at	1.38e-06	8.54e-08	-18.1051	8.36777	-0.952693	SFRS14	splicing factor, arginine/serine-rich 14	0.516667
axo07380-f_at	3.28e-05	5.3e-06	-10.6105	3.80502	-0.951619	IL13RA1	interleukin 13 receptor, alpha 1 precursor	0.517052
axo19361-f_at	1.06e-05	1.26e-06	-12.8144	5.39903	-0.951437	C17orf28	hypothetical protein LOC283987	0.517117
axo09991-f_at	0.00204	0.000732	-5.28595	-1.63281	-0.950574	CDH1	cadherin 1, type 1 preproprotein	0.517427
axo10556-f_at	6.15e-06	6.24e-07	-14.0331	6.175	-0.950003	ATP6V1G1	vacuolar H+ ATPase G1	0.517631
axo18067-f_at	1.35e-06	8.24e-08	-18.1867	8.4066	-0.949653	SLC30A1	solute carrier family 30 (zinc transporter), member 1	0.517757
axo16574-f_at	1.79e-06	1.22e-07	-17.3099	7.98018	-0.949448	ECT2	epithelial cell transforming sequence 2 oncogene protein	0.517831
axo18289-f_at	0.000112	2.39e-05	-8.66642	2.13583	-0.947038	SLC17A9	vesicular nucleotide transporter SLC17A9	0.518696
axo03170-f_at	2.88e-06	2.3e-07	-15.955	7.27761	-0.945978	PRICKLE2	prickle-like 2	0.519077
axo07662-r_at	1.14e-06	6.48e-08	-18.7525	8.67106	-0.945757	SLC31A1	solute carrier family 31 (copper transporters), member 1	0.519157
axo15493-r_at	1.4e-05	1.82e-06	-12.215	4.99183	-0.945325	GOLT1B	golgi transport 1 homolog B	0.519313
axo09483-f_at	9.71e-05	2.02e-05	-8.87082	2.32539	-0.945099	GALNT4	polypeptide N-acetylgalactosaminyltransferase 4	0.519394
axo12090-f_at	6.57e-05	1.25e-05	-9.46294	2.85476	-0.94504	TXNRD2	thioredoxin reductase 2 precursor	0.519415
axo07263-r_at	3.51e-06	2.98e-07	-15.4336	6.99164	-0.944582	FBL	fibrillarin	0.51958
axo12961-f_at	1.32e-05	1.68e-06	-12.3432	5.08044	-0.943868	TPX2	TPX2, microtubule-associated protein homolog	0.519837
axo07093-f_at	2.76e-05	4.27e-06	-10.9175	4.04401	-0.943638	KLF6	Kruppel-like factor 6	0.51992
axo08640-r_at	2.88e-06	2.29e-07	-15.9592	7.27987	-0.943573	RANBP1	RAN binding protein 1	0.519944
axo04456-f_at	4.55e-05	7.97e-06	-10.0505	3.35307	-0.94286	TOP2A	DNA topoisomerase II, alpha isozyme	0.520201
axo13185-f_at	5.1e-06	4.87e-07	-14.4885	6.44878	-0.942278	PLXNB2	plexin B2	0.520411
axo13529-f_at	0.000296	7.64e-05	-7.37863	0.851767	-0.942254	CHMP4A	chromatin modifying protein 4A	0.520419
axo11690-f_at	3.64e-06	3.11e-07	-15.349	6.9444	-0.94209	TUBA1B	tubulin, alpha, ubiquitous	0.520478
axo09385-r_s_at	1.18e-06	6.85e-08	-18.6195	8.6096	-0.941395	KHSRP	KH-type splicing regulatory protein (FUSE binding protein 2)	0.520729
axo05330-r_at	2.45e-06	1.84e-07	-16.4163	7.52314	-0.941104	BRD2	bromodomain containing 2	0.520834
axo10539-f_at	6.28e-05	1.18e-05	-9.54138	2.92279	-0.940257	VPS4B	vacuolar protein sorting factor 4B	0.52114
axo09725-f_at	1.85e-05	2.57e-06	-11.6701	4.60541	-0.938743	RHOB	ras homolog gene family, member B	0.521687
axo17060-f_at	6.99e-06	7.4e-07	-13.7267	5.98602	-0.938519	BAIAP2L1	BAI1-associated protein 2-like 1	0.521768
axo11514-r_at	4.96e-06	4.69e-07	-14.5584	6.49008	-0.938519	MCM6	minichromosome maintenance complex component 6	0.521768
axo16149-f_at	3.43e-06	2.88e-07	-15.4992	7.02811	-0.938432	DNASE1L1	deoxyribonuclease I-like 1 precursor	0.5218
axo10693-r_at	9.32e-05	1.92e-05	-8.93009	2.37968	-0.937965	PGGT1B	protein geranylgeranyltransferase type I, beta subunit	0.521969
axo11404-r_at	5.62e-05	1.03e-05	-9.71113	3.06839	-0.937597	NME6	nucleoside diphosphate kinase type 6	0.522102
axo09628-f_at	0.000245	6.11e-05	-7.61296	1.09774	-0.937508	PRPF4B	serine/threonine-protein kinase PRP4K	0.522134
axo19551-f_at	0.00059	0.000173	-6.56556	-0.049039	-0.937283	PUS3	pseudouridylate synthase 3	0.522216
axo15289-r_x_at	1.06e-06	5.86e-08	-18.9936	8.78132	-0.936852	KRT76	keratin 76	0.522371
axo03617-f_at	1.23e-05	1.52e-06	-12.5025	5.1894	-0.936768		5-hydroxytryptamine (serotonin) receptor 3A isoform a precursor	0.522402
axo01635-f_at	7.14e-05	1.38e-05	-9.33529	2.74304	-0.935518	SAMD9L	sterile alpha motif domain containing 9-like	0.522855
axo18226-f_at	6.11e-05	1.14e-05	-9.58249	2.95825	-0.935238	TEAD1	TEA domain family member 1	0.522956
axo15595-r_at	4.75e-06	4.43e-07	-14.6654	6.55295	-0.934866	MRTO4	mRNA turnover 4 homolog	0.523091
axo10555-f_at	8.18e-05	1.64e-05	-9.12185	2.55332	-0.934611	CXCL14	small inducible cytokine B14 precursor	0.523184
axo03515-r_at	0.000381	0.000103	-7.07081	0.519616	-0.933105	EXT2	exostosin 2 isoform 2	0.52373
axo12335-f_at	6.6e-06	6.88e-07	-13.8557	6.0661	-0.933084	GADD45G	growth arrest and DNA-damage-inducible, gamma	0.523738
axo01815-f_at	2.78e-06	2.17e-07	-16.0726	7.34084	-0.932243	RNF19B	ring finger protein 19B isoform a	0.524043
axo04878-f_at	1.09e-06	6.07e-08	-18.9099	8.74319	-0.931424	C17orf67	hypothetical protein LOC339210	0.52434
axo20102-f_at	1.38e-05	1.78e-06	-12.2455	5.01296	-0.92985	ZC3H10	zinc finger CCCH-type containing 10	0.524913
axo11423-f_at	2e-05	2.85e-06	-11.5133	4.49121	-0.929674	M6PRBP1	mannose 6 phosphate receptor binding protein 1	0.524977
axo00028-f_at	2.42e-06	1.81e-07	-16.4557	7.54377	-0.929547	COL4A5	type IV collagen alpha 5 isoform 2 precursor	0.525023
axo12181-f_at	6.75e-06	7.08e-07	-13.8059	6.03525	-0.928716	CLCA2	chloride channel accessory 2 precursor	0.525326
axo04765-f_at	9.49e-06	1.09e-06	-13.0491	5.55366	-0.928695	SPI1	hematopoietic transcription factor PU.1 isoform 1	0.525333
axo09808-f_at	0.000274	6.96e-05	-7.47594	0.954626	-0.927926	ORC1L	origin recognition complex, subunit 1	0.525614
axo14664-f_at	1.27e-05	1.59e-06	-12.4332	5.14213	-0.927767	RCOR1	REST corepressor 1	0.525671
axo02750-f_at	0.00018	4.22e-05	-8.0156	1.50716	-0.927353	RPL14	ribosomal protein L14	0.525822
axo15184-f_s_at	1.38e-05	1.78e-06	-12.2448	5.0125	-0.926037	SERBP1	SERPINE1 mRNA binding protein 1 isoform 4	0.526302
axo07032-f_at	1.46e-06	9.26e-08	-17.9206	8.27934	-0.925825	CCNA2	cyclin A	0.526379
axo16332-f_at	1.33e-06	8.1e-08	-18.229	8.42665	-0.92523	UCKL1	uridine-cytidine kinase 1-like 1	0.526597
axo19806-f_at	7.53e-05	1.48e-05	-9.2508	2.66838	-0.925116	ZCCHC7	zinc finger, CCHC domain containing 7	0.526638
axo19761-f_at	3.43e-05	5.6e-06	-10.5327	3.74353	-0.924442	DSEL	dermatan sulfate epimerase-like	0.526884
axo09611-r_at	1.44e-05	1.89e-06	-12.1544	4.94964	-0.924331	ZNF259	zinc finger protein 259	0.526925
axo08365-r_at	1.62e-05	2.18e-06	-11.9266	4.78929	-0.924189	PDPK1	3-phosphoinositide dependent protein kinase-1 isoform 1	0.526977
axo14784-f_at	0.00114	0.000375	-5.85651	-0.899914	-0.924089	KIAA0664	hypothetical protein LOC23277	0.527013
axo08017-f_at	2.35e-06	1.74e-07	-16.5364	7.58595	-0.924021	JUP	junction plakoglobin	0.527038
axo09551-f_at	6.32e-06	6.49e-07	-13.9616	6.13127	-0.923443	SUCLG2	succinate-CoA ligase, GDP-forming beta subunit precursor	0.527249
axo17544-f_at	2.58e-06	1.97e-07	-16.2759	7.44914	-0.922686	MRPL47	mitochondrial ribosomal protein L47 isoform a	0.527526
axo02419-f_at	2.31e-06	1.7e-07	-16.5817	7.60956	-0.922433	PDE12	phosphodiesterase 12	0.527619
axo02821-f_at	1.14e-06	6.46e-08	-18.7581	8.6736	-0.92103	BIRC3	baculoviral IAP repeat-containing protein 3	0.528132
axo19812-f_at	5.36e-06	5.2e-07	-14.367	6.37657	-0.920769	SLITRK6	slit and trk like 6	0.528227
axo14269-f_at	0.00031	8.05e-05	-7.32466	0.794283	-0.920548	ENPP4	ectonucleotide pyrophosphatase/phosphodiesterase 4 (putative function)	0.528308
axo11953-f_at	0.0396	0.0213	-2.85174	-5.23892	-0.920434	NCOR1	nuclear receptor co-repressor 1	0.52835
axo15507-f_at	2.35e-06	1.74e-07	-16.5373	7.58645	-0.920229	PALLD	palladin	0.528425
axo06255-r_at	5.65e-06	5.56e-07	-14.2443	6.30304	-0.919782	C12orf72	hypothetical protein LOC254013	0.528589
axo15514-f_s_at	1.16e-05	1.42e-06	-12.6157	5.26601	-0.91968	GINS2	DNA replication complex GINS protein PSF2	0.528626
axo07375-f_at	2.84e-06	2.24e-07	-16.0064	7.3053	-0.919534	CYR61	cysteine-rich, angiogenic inducer, 61	0.52868
axo18868-f_at	4.29e-06	3.88e-07	-14.92	6.70069	-0.919501	SFRS14	splicing factor, arginine/serine-rich 14	0.528692
axo13717-r_at	2.23e-06	1.63e-07	-16.6789	7.65991	-0.918058	GNL3	guanine nucleotide binding protein-like 3 isoform 1	0.529221
axo11578-r_s_at	1.17e-06	6.74e-08	-18.6575	8.62721	-0.918005	HNRNPM	heterogeneous nuclear ribonucleoprotein M isoform a	0.52924
axo11232-f_at	7.2e-05	1.4e-05	-9.32137	2.73078	-0.916484	RHEB	Ras homolog enriched in brain	0.529799
axo20887-f_s_at	2.54e-06	1.93e-07	-16.3165	7.47057	-0.916434	HNRNPM	heterogeneous nuclear ribonucleoprotein M isoform a	0.529817
axo20049-f_at	1.71e-05	2.33e-06	-11.8241	4.7163	-0.915246	RBBP6	retinoblastoma-binding protein 6 isoform 3	0.530254
axo03274-f_at	1.82e-05	2.51e-06	-11.7075	4.63247	-0.914536	TPD52L2	tumor protein D52-like 2 isoform c	0.530514
axo09070-f_at	6.72e-06	7.03e-07	-13.8187	6.0432	-0.912521	UBE2D2	ubiquitin-conjugating enzyme E2D 2 isoform 1	0.531256
axo08153-f_at	8.78e-06	9.91e-07	-13.2175	5.66304	-0.91236	MCM3	minichromosome maintenance complex component 3	0.531315
axo04142-f_at	1.57e-06	1.02e-07	-17.7076	8.17619	-0.910851		PREDICTED: similar to hCG1811042	0.531871
axo00975-f_at	1.01e-05	1.18e-06	-12.9261	5.47298	-0.910112	CASC5	cancer susceptibility candidate 5 isoform 2	0.532144
axo21377-f_s_at	7.53e-06	8.16e-07	-13.554	5.87778	-0.909878	KRT4	keratin 4	0.53223
axo12138-r_at	1.67e-06	1.11e-07	-17.5126	8.08064	-0.909153	FBLN1	fibulin 1 isoform D	0.532497
axo13386-f_at	3.19e-05	5.13e-06	-10.6573	3.84191	-0.90844	ST8SIA6	ST8 alpha-N-acetyl-neuraminide alpha-2,8-sialyltransferase 6	0.532761
axo17774-r_at	2.99e-05	4.72e-06	-10.7742	3.93321	-0.90744	TMEM181	G protein-coupled receptor 178	0.53313
axo19578-f_at	4.14e-05	7.09e-06	-10.2095	3.48354	-0.906981	COG3	component of golgi transport complex 3	0.5333
axo12282-r_at	5.39e-06	5.24e-07	-14.3517	6.36742	-0.906528	CYSLTR1	cysteinyl leukotriene receptor 1	0.533468
axo07975-f_at	0.000148	3.36e-05	-8.27286	1.76038	-0.904369	INSM1	insulinoma-associated 1	0.534266
axo18423-f_at	1.16e-05	1.43e-06	-12.608	5.2608	-0.904165	TMEM168	transmembrane protein 168	0.534342
axo04409-f_at	1.89e-06	1.31e-07	-17.1445	7.89737	-0.903767	SMAP1	stromal membrane-associated GTPase-activating protein 1 isoform A	0.534489
axo18638-f_at	1.88e-05	2.64e-06	-11.6316	4.57748	-0.90363	SPATS2	spermatogenesis associated, serine-rich 2	0.53454
axo17370-f_at	0.000103	2.17e-05	-8.78041	2.242	-0.903615	C1GALT1	core 1 synthase, glycoprotein-N-acetylgalactosamine 3-beta-galactosyltransferase, 1	0.534546
axo01385-f_at	3.68e-06	3.17e-07	-15.3104	6.92269	-0.903356	GPRC6A	G protein-coupled receptor, family C, group 6, member A	0.534642
axo17557-f_at	4.32e-05	7.47e-06	-10.1372	3.42447	-0.902951	SALL4	sal-like 4	0.534792
axo14164-f_at	4.45e-05	7.76e-06	-10.0867	3.38296	-0.902247	NUAK1	AMPK-related protein kinase 5	0.535053
axo18031-f_at	1.21e-05	1.5e-06	-12.5287	5.2072	-0.901687	TNFAIP1	tumor necrosis factor, alpha-induced protein 1	0.53526
axo20282-r_at	0.00107	0.000347	-5.92391	-0.816239	-0.901102	RHPN2	rhophilin, Rho GTPase binding protein 2	0.535478
axo20075-r_at	9.27e-06	1.06e-06	-13.101	5.58754	-0.900623	CANX	calnexin precursor	0.535656
axo04548-f_at	1.67e-06	1.11e-07	-17.5202	8.08435	-0.900602	SLC39A7	solute carrier family 39, member 7	0.535663
axo06600-f_at	5.36e-06	5.2e-07	-14.366	6.37595	-0.900535	SEC14L1	SEC14 (S. cerevisiae)-like 1 isoform c	0.535688
axo21139-f_at	1.45e-06	9.11e-08	-17.9559	8.29634	-0.898741	LOC729085	hypothetical protein LOC729085	0.536355
axo18936-f_at	2.52e-05	3.83e-06	-11.0782	4.16672	-0.898238	NAT10	N-acetyltransferase 10 isoform a	0.536542
axo11615-f_at	2.17e-06	1.57e-07	-16.7533	7.69829	-0.897626	MANF	arginine-rich, mutated in early stage tumors	0.536769
axo17389-r_s_at	0.000274	6.95e-05	-7.47701	0.955743	-0.897615	GOSR2	golgi SNAP receptor complex member 2 isoform C	0.536773
axo14927-f_at	6.6e-06	6.87e-07	-13.8581	6.06759	-0.896311	LARS2	leucyl-tRNA synthetase 2, mitochondrial precursor	0.537259
axo03026-f_s_at	3e-05	4.75e-06	-10.767	3.92766	-0.895874	CXorf23	hypothetical protein LOC256643	0.537421
axo03824-r_at	1.17e-05	1.44e-06	-12.5907	5.24912	-0.895828	CREBZF	HCF-binding transcription factor Zhangfei	0.537439
axo12780-f_at	0.00011	2.34e-05	-8.69245	2.16018	-0.895704	DUSP10	dual specificity phosphatase 10 isoform a	0.537485
axo17981-f_at	2.35e-05	3.5e-06	-11.2068	4.26382	-0.895611	HIST1H2BJ	histone cluster 1, H2bj	0.537519
axo06337-f_at	0.000516	0.000147	-6.72107	0.129195	-0.895603	ALOX12B	arachidonate 12-lipoxygenase, 12R type	0.537522
axo13418-f_at	0.0158	0.0075	-3.54655	-4.14319	-0.89525	MYOF	myoferlin isoform a	0.537654
axo19925-f_at	0.0143	0.0067	-3.62425	-4.02291	-0.895223	BAZ1B	bromodomain adjacent to zinc finger domain, 1B	0.537664
axo11722-f_at	1.4e-06	8.7e-08	-18.0615	8.34697	-0.895208	CROP	cisplatin resistance-associated overexpressed protein	0.53767
axo04089-r_at	1.06e-05	1.26e-06	-12.8138	5.39861	-0.894846	LOC100128533	PREDICTED: similar to hCG2013595	0.537805
axo16793-f_at	3.28e-06	2.74e-07	-15.601	7.08449	-0.894601	PRR11	proline rich 11	0.537896
axo10254-r_s_at	4.76e-06	4.44e-07	-14.6637	6.55194	-0.893902	TRA2B	splicing factor, arginine/serine-rich 10	0.538157
axo07244-r_s_at	0.000135	3.02e-05	-8.39602	1.8794	-0.893684	ELAVL1	ELAV-like 1	0.538238
axo00910-f_at	3.11e-06	2.55e-07	-15.7473	7.16478	-0.89336	SLC10A7	solute carrier family 10 (sodium/bile acid cotransporter family), member 7 isoform b	0.538359
axo13324-f_at	2.83e-05	4.4e-06	-10.8763	4.01229	-0.892692	RBM15B	RNA binding motif protein 15B	0.538608
axo01010-r_at	1.8e-06	1.23e-07	-17.2761	7.96328	-0.892493	CCDC43	coiled-coil domain containing 43 isoform 1	0.538682
axo12119-r_at	5.89e-05	1.09e-05	-9.63945	3.00717	-0.891023	POLR3C	polymerase (RNA) III (DNA directed) polypeptide C (62kD)	0.539232
axo09593-f_at	6.35e-05	1.2e-05	-9.51874	2.9032	-0.890964	FCGBP	Fc fragment of IgG binding protein	0.539254
axo14643-f_at	1.04e-05	1.23e-06	-12.8498	5.4225	-0.890858	SLC35D1	solute carrier family 35 (UDP-glucuronic acid/UDP-N-acetylgalactosamine dual transporter), member D1	0.539293
axo08387-r_at	3.17e-06	2.62e-07	-15.6878	7.13219	-0.89035	PGAM1	phosphoglycerate mutase 1 (brain)	0.539483
axo11279-f_at	9.82e-05	2.04e-05	-8.85412	2.31004	-0.889507	PSCA	prostate stem cell antigen preproprotein	0.539799
axo05889-f_at	2.06e-05	2.97e-06	-11.4544	4.44791	-0.889282	SUPT5H	suppressor of Ty 5 homolog isoform b	0.539883
axo13697-f_at	1.65e-06	1.09e-07	-17.5545	8.10124	-0.888754	OPTC	opticin precursor	0.540081
axo02492-f_at	0.000283	7.22e-05	-7.43747	0.914084	-0.888627	CCRL1	chemokine (C-C motif) receptor-like 1	0.540128
axo08276-r_at	1.27e-05	1.6e-06	-12.4187	5.13222	-0.887735	NEK2	NIMA-related kinase 2	0.540462
axo05819-r_at	1.9e-06	1.32e-07	-17.1225	7.88628	-0.887424	FAM108A1	hypothetical protein LOC81926 isoform 2	0.540579
axo02545-f_at	4.81e-06	4.49e-07	-14.6389	6.5374	-0.887089	TIAL1	TIA-1 related protein isoform 2	0.540704
axo03027-f_at	9.91e-06	1.15e-06	-12.9594	5.4949	-0.886804	CXorf23	hypothetical protein LOC256643	0.540811
axo19668-f_at	2.88e-06	2.29e-07	-15.9609	7.28079	-0.886362	PRSS27	marapsin	0.540977
axo18030-r_at	6.98e-05	1.34e-05	-9.37116	2.77456	-0.884781	TNFAIP1	tumor necrosis factor, alpha-induced protein 1	0.54157
axo17661-r_at	1.8e-05	2.48e-06	-11.7247	4.64485	-0.88472	RIMKLB	ribosomal modification protein rimK-like family member B	0.541593
axo00779-f_at	1.51e-06	9.67e-08	-17.8212	8.23134	-0.884691	MDP1	magnesium-dependent phosphatase 1	0.541604
axo08306-r_at	3.81e-06	3.32e-07	-15.2222	6.87305	-0.884435	OCLN	occludin	0.5417
axo00253-r_at	2.04e-05	2.94e-06	-11.4671	4.45725	-0.884044	VIT	vitrin	0.541846
axo15491-r_at	0.000261	6.57e-05	-7.53703	1.01868	-0.883966	NUPL1	nucleoporin like 1 isoform c	0.541876
axo15812-f_at	0.000123	2.67e-05	-8.53767	2.01456	-0.883957	C3orf19	hypothetical protein LOC51244	0.541879
axo03365-f_at	5.49e-05	1e-05	-9.74749	3.09929	-0.882552	SF1	splicing factor 1 isoform 3	0.542407
axo19480-f_at	2.13e-05	3.1e-06	-11.3894	4.39991	-0.88194	CCNL2	cyclin L2 isoform A	0.542637
axo20132-r_s_at	4.27e-05	7.36e-06	-10.158	3.44148	-0.881937	C9orf3	aminopeptidase O	0.542638
axo19684-f_at	5.32e-05	9.65e-06	-9.79715	3.14134	-0.881802	CCNB1	cyclin B1	0.542689
axo00065-r_x_at	3.37e-06	2.83e-07	-15.5382	7.04975	-0.881563	KRT71	keratin 71	0.542779
axo06214-r_at	0.00255	0.000944	-5.07927	-1.9094	-0.881432	EIF2AK2	eukaryotic translation initiation factor 2-alpha kinase 2 isoform b	0.542829
axo13394-f_at	2.19e-06	1.59e-07	-16.7321	7.6874	-0.881338	PREB	prolactin regulatory element binding protein	0.542864
axo00098-f_at	0.000128	2.81e-05	-8.47785	1.9577	-0.880163	COL4A6	type IV alpha 6 collagen isoform B precursor	0.543306
axo05562-f_at	0.00039	0.000106	-7.04151	0.487445	-0.879549	NR2C1	nuclear receptor subfamily 2, group C, member 1 isoform c	0.543537
axo18098-f_at	0.0237	0.0119	-3.23786	-4.6264	-0.87939	SCAF1	SR-related CTD-associated factor 1	0.543597
axo05388-f_at	0.00353	0.00137	-4.78472	-2.31396	-0.878756	NBEAL1	neurobeachin-like 1 isoform 3	0.543836
axo02037-f_at	7.41e-06	7.98e-07	-13.5939	5.90292	-0.878572	LIN9	lin-9 homolog	0.543906
axo00610-f_at	0.0181	0.00877	-3.4403	-4.30861	-0.878545	NIPBL	delangin isoform A	0.543916
axo06179-f_at	2.75e-06	2.14e-07	-16.1068	7.35914	-0.878182	TCOF1	Treacher Collins-Franceschetti syndrome 1 isoform f	0.544053
axo20322-f_at	0.000482	0.000136	-6.79825	0.216574	-0.877933	C5orf30	hypothetical protein LOC90355	0.544147
axo05221-r_at	3.01e-05	4.76e-06	-10.7638	3.9251	-0.877716	PDE4D	cAMP-specific phosphodiesterase 4D isoform 1	0.544228
axo10363-f_at	8.32e-05	1.68e-05	-9.09556	2.5297	-0.877666	CCNB2	cyclin B2	0.544247
axo04266-f_at	2.21e-06	1.61e-07	-16.7049	7.67336	-0.877214	INCENP	inner centromere protein antigens 135/155kDa isoform 1	0.544418
axo02104-f_at	2.54e-06	1.94e-07	-16.3095	7.46692	-0.87657	VKORC1L1	vitamin K epoxide reductase complex, subunit 1-like 1	0.544661
axo10470-r_at	1.54e-05	2.06e-06	-12.0127	4.85025	-0.876425	SNRNP40	WD repeat domain 57 (U5 snRNP specific)	0.544716
axo00706-f_at	0.000109	2.31e-05	-8.70569	2.17253	-0.876105	SHF	Src homology 2 domain containing F	0.544836
axo19760-f_at	4.48e-06	4.12e-07	-14.8052	6.6344	-0.875665	DSEL	dermatan sulfate epimerase-like	0.545003
axo16581-f_at	0.00247	0.000912	-5.10727	-1.87157	-0.875104	MTPAP	PAP associated domain containing 1	0.545214
axo06643-f_at	0.000135	3e-05	-8.4031	1.8862	-0.87494	CCNL2	cyclin L2 isoform D	0.545276
axo04535-f_at	4.29e-05	7.4e-06	-10.1503	3.43522	-0.874743	BCLAF1	BCL2-associated transcription factor 1 isoform 2	0.545351
axo08427-r_at	0.000454	0.000127	-6.86491	0.291483	-0.874619	PNN	pinin, desmosome associated protein	0.545398
axo07767-f_at	3.36e-05	5.48e-06	-10.563	3.76756	-0.873557	EIF4E	eukaryotic translation initiation factor 4E isoform 1	0.545799
axo02335-f_at	9.61e-06	1.11e-06	-13.0233	5.53679	-0.873211	PPM1B	protein phosphatase 1B isoform 5	0.54593
axo16031-r_at	1.85e-05	2.58e-06	-11.6697	4.60511	-0.872451	CDV3	carnitine deficiency-associated gene expressed in ventricle 3 isoform b	0.546218
axo11986-r_at	2.48e-05	3.75e-06	-11.1054	4.18733	-0.870618	TACC3	transforming, acidic coiled-coil containing protein 3	0.546913
axo04288-f_at	1.06e-05	1.26e-06	-12.8119	5.39734	-0.870115	PGP	phosphoglycolate phosphatase	0.547103
axo06250-f_at	5.58e-05	1.02e-05	-9.72125	3.077	-0.869499	TMEM2	transmembrane protein 2 isoform b	0.547337
axo10966-f_at	1.49e-05	1.98e-06	-12.0783	4.89642	-0.86948	HIST1H1C	histone cluster 1, H1c	0.547344
axo20976-f_at	2.13e-06	1.54e-07	-16.8001	7.72234	-0.867468	CBX3	chromobox homolog 3	0.548108
axo10232-f_at	1.13e-05	1.38e-06	-12.6659	5.29981	-0.867251	PKNOX1	PBX/knotted 1 homeobox 1	0.54819
axo04846-f_at	9.54e-05	1.97e-05	-8.89667	2.3491	-0.867245	STRN3	nuclear autoantigen isoform 1	0.548193
axo17604-f_at	1.9e-05	2.67e-06	-11.6133	4.5642	-0.867097	PELI1	pellino protein	0.548249
axo16809-r_at	3.18e-06	2.64e-07	-15.6779	7.12676	-0.866494	PI4K2B	phosphatidylinositol 4-kinase type 2 beta	0.548478
axo12204-f_at	7.7e-06	8.38e-07	-13.5077	5.84852	-0.865826	CTCF	CCCTC-binding factor	0.548732
axo09380-r_at	2.09e-06	1.49e-07	-16.8586	7.75234	-0.865281	YARS	tyrosyl-tRNA synthetase	0.548939
axo21362-f_at	0.000192	4.56e-05	-7.92976	1.42123	-0.86504	SNX18	sorting nexin 18 isoform c	0.549031
axo11399-f_at	8.3e-05	1.67e-05	-9.10273	2.53614	-0.864092	PRMT3	protein arginine methyltransferase 3 isoform 1	0.549392
axo11749-r_at	3.37e-06	2.82e-07	-15.5413	7.05148	-0.863903	PIM3	pim-3 oncogene	0.549464
axo00946-f_at	0.000169	3.93e-05	-8.09488	1.58587	-0.862905	ADCY4	adenylate cyclase 4	0.549844
axo18894-f_at	4.45e-05	7.76e-06	-10.0866	3.38281	-0.862543	FASTKD1	FAST kinase domains 1	0.549982
axo04896-r_at	1.99e-06	1.4e-07	-16.9949	7.82176	-0.862456	ACLY	ATP citrate lyase isoform 1	0.550015
axo02394-f_at	1.1e-05	1.32e-06	-12.7322	5.3442	-0.86243	MIDN	midnolin	0.550025
axo15416-f_at	1.02e-05	1.21e-06	-12.8834	5.44473	-0.862264	UTP18	UTP18, small subunit processome component	0.550089
axo02404-r_at	6.96e-06	7.33e-07	-13.7431	5.99627	-0.862262	PPARD	peroxisome proliferative activated receptor, delta isoform 2	0.550089
axo12856-f_at	1.46e-05	1.93e-06	-12.1226	4.92739	-0.86175	BRCA1	breast cancer 1, early onset isoform BRCA1-delta9-10-11b	0.550285
axo10572-f_at	1.71e-06	1.15e-07	-17.4411	8.04533	-0.861415	ACTN4	actinin, alpha 4	0.550412
axo05478-f_at	0.000337	8.9e-05	-7.22055	0.682503	-0.861381	RACGAP1	Rac GTPase activating protein 1	0.550425
axo19597-f_at	7.94e-06	8.75e-07	-13.433	5.80116	-0.860661	FAM107B	hypothetical protein LOC83641	0.5507
axo01915-f_at	5.44e-06	5.31e-07	-14.3292	6.35398	-0.860501	ATP2A2	ATPase, Ca++ transporting, slow twitch 2 isoform 1	0.550761
axo19980-f_at	8.3e-05	1.67e-05	-9.10091	2.53451	-0.860193	DOT1L	DOT1-like, histone H3 methyltransferase	0.550879
axo13178-f_at	1.7e-05	2.32e-06	-11.8278	4.71892	-0.860064	PITPNB	phosphatidylinositol transfer protein, beta	0.550928
axo01585-f_at	6.33e-06	6.51e-07	-13.9561	6.12789	-0.859711	MFSD6L	major facilitator superfamily domain containing 6-like	0.551063
axo15286-f_at	4.11e-05	7.02e-06	-10.2226	3.49426	-0.859497	LMO7	LIM domain only 7 isoform 2	0.551145
axo13090-f_at	2.37e-06	1.75e-07	-16.5166	7.57564	-0.859491	G3BP2	Ras-GTPase activating protein SH3 domain-binding protein 2 isoform a	0.551147
axo20034-f_s_at	0.0232	0.0116	-3.25281	-4.60283	-0.858929	CARD6	caspase recruitment domain family, member 6	0.551362
axo16432-f_at	2.69e-06	2.09e-07	-16.1547	7.38474	-0.858629	PTCD3	pentatricopeptide repeat domain 3	0.551477
axo18530-f_at	8.88e-05	1.81e-05	-8.99972	2.44309	-0.858305	IPPK	inositol 1,3,4,5,6-pentakisphosphate 2-kinase	0.5516
axo00057-f_at	5.96e-05	1.11e-05	-9.6196	2.99016	-0.857946	CUGBP2	CUG triplet repeat, RNA binding protein 2 isoform 3	0.551737
axo16730-f_at	0.00028	7.15e-05	-7.44737	0.924531	-0.85659	CNDP2	CNDP dipeptidase 2	0.552257
axo08403-f_at	5.5e-06	5.39e-07	-14.2999	6.33641	-0.85588	PIM1	non-specific serine/threonine protein kinase	0.552528
axo15666-f_at	6.58e-06	6.84e-07	-13.8666	6.07281	-0.855815	TOB2	transducer of ERBB2, 2	0.552553
axo16979-f_at	2.06e-06	1.47e-07	-16.8998	7.77336	-0.855809	KIAA1704	hypothetical protein LOC55425	0.552556
axo01770-f_at	6.36e-05	1.2e-05	-9.51752	2.90215	-0.855497	TMPO	thymopoietin isoform beta	0.552675
axo19362-f_at	5.71e-06	5.67e-07	-14.2058	6.27983	-0.855448	C17orf28	hypothetical protein LOC283987	0.552694
axo11193-r_at	1.08e-05	1.3e-06	-12.7657	5.36661	-0.855071	LGALS3BP	galectin 3 binding protein	0.552838
axo09781-r_at	2.29e-06	1.68e-07	-16.6054	7.62183	-0.854985	FEN1	flap structure-specific endonuclease 1	0.552871
axo16877-f_at	9.37e-06	1.08e-06	-13.0762	5.57137	-0.854387	PDLIM5	PDZ and LIM domain 5 isoform b	0.5531
axo05033-f_at	3.06e-05	4.86e-06	-10.7329	3.90108	-0.853999	CCNK	cyclin K isoform 1	0.553249
axo20138-r_at	3.78e-06	3.28e-07	-15.2452	6.886	-0.853406	CIRH1A	cirhin	0.553477
axo11006-f_at	2.84e-06	2.25e-07	-16.001	7.30237	-0.852213	LMO7	LIM domain only 7 isoform 1	0.553934
axo07951-f_at	3.19e-05	5.12e-06	-10.6584	3.84273	-0.851869	IARS	isoleucyl-tRNA synthetase	0.554066
axo14833-f_at	1.89e-05	2.65e-06	-11.6289	4.57554	-0.851063	SPOP	speckle-type POZ protein	0.554376
axo16972-r_at	5.67e-06	5.59e-07	-14.2326	6.29594	-0.850989	PBK	PDZ binding kinase	0.554405
axo18487-r_at	2.82e-06	2.22e-07	-16.0292	7.31755	-0.850713	ELOVL4	elongation of very long chain fatty acids-like 4	0.554511
axo00677-r_at	4.21e-06	3.78e-07	-14.9692	6.72902	-0.85066	RRM1	ribonucleoside-diphosphate reductase M1 chain	0.554531
axo19493-f_at	0.000116	2.48e-05	-8.62431	2.09633	-0.850645		ring finger protein 170	0.554537
axo12190-f_at	0.000249	6.22e-05	-7.5939	1.07795	-0.849994	EXOC5	SEC10 protein	0.554787
axo19047-f_at	6.35e-06	6.54e-07	-13.9488	6.12341	-0.849926	CARD16	caspase-1 dominant-negative inhibitor pseudo-ICE isoform 1	0.554813
axo11879-f_at	1.59e-05	2.14e-06	-11.9579	4.81152	-0.849604	DNAJC3	DnaJ (Hsp40) homolog, subfamily C, member 3	0.554937
axo15163-f_at	1.79e-06	1.22e-07	-17.2964	7.97342	-0.84898	C1orf77	hypothetical protein LOC26097	0.555177
axo00766-r_at	3e-06	2.43e-07	-15.8447	7.21789	-0.848244	ARL11	ADP-ribosylation factor-like 11	0.55546
axo13692-f_at	2.7e-06	2.09e-07	-16.1463	7.38026	-0.847539	TNFAIP8	tumor necrosis factor, alpha-induced protein 8 isoform a	0.555732
axo03393-f_at	1.7e-05	2.31e-06	-11.8382	4.72635	-0.84743	PDLIM7	PDZ and LIM domain 7 isoform 2	0.555774
axo06131-f_at	4.63e-05	8.12e-06	-10.0259	3.33274	-0.847171	MAT1A	methionine adenosyltransferase I, alpha	0.555874
axo00101-f_at	1.31e-05	1.66e-06	-12.3567	5.0897	-0.846788	WDR4	WD repeat domain 4 protein	0.556021
axo07046-r_at	0.000795	0.000246	-6.23601	-0.436545	-0.846413	CDC5L	CDC5-like	0.556166
axo19397-f_at	0.00135	0.000456	-5.68645	-1.11372	-0.846326	NSBP1	nucleosomal binding protein 1	0.556199
axo15693-f_at	4.81e-06	4.51e-07	-14.6341	6.53457	-0.845514	GPN3	GPN-loop GTPase 3	0.556513
axo12296-r_at	0.000333	8.77e-05	-7.23561	0.69875	-0.844809	UTP14A	UTP14, U3 small nucleolar ribonucleoprotein, homolog A	0.556784
axo05328-f_at	0.000573	0.000166	-6.60166	-0.007404	-0.844215	BRD2	bromodomain containing 2	0.557014
axo19990-f_at	6.33e-06	6.51e-07	-13.9551	6.12729	-0.843624	HOPX	HOP homeobox isoform a	0.557242
axo16028-f_at	4.52e-05	7.91e-06	-10.0614	3.3621	-0.843463	NKRF	transcription factor NRF	0.557304
axo12879-f_at	2.77e-06	2.16e-07	-16.085	7.34746	-0.843358	OGFR	opioid growth factor receptor	0.557345
axo10941-f_at	6.09e-06	6.17e-07	-14.0535	6.18744	-0.843157	GJB5	gap junction protein, beta 5, 31.1kDa	0.557423
axo18940-f_at	0.000103	2.15e-05	-8.79075	2.25157	-0.84282	ESCO2	establishment of cohesion 1 homolog 2	0.557552
axo16673-f_at	3.82e-06	3.33e-07	-15.216	6.86956	-0.842337	ATAD3A	ATPase family, AAA domain containing 3A	0.557739
axo14469-r_at	4.96e-06	4.68e-07	-14.5632	6.49292	-0.842297	RRP1B	ribosomal RNA processing 1 homolog B	0.557755
axo05837-f_at	0.000562	0.000163	-6.6237	0.017935	-0.841778	MYO1B	myosin IB isoform 1	0.557956
axo10474-r_at	1.09e-05	1.31e-06	-12.7415	5.35042	-0.841689	TJP2	tight junction protein 2 (zona occludens 2) isoform 1	0.55799
axo15702-r_at	1.65e-06	1.09e-07	-17.5605	8.10421	-0.841435	DNAJB11	DnaJ (Hsp40) homolog, subfamily B, member 11 precursor	0.558088
axo01312-r_at	4.04e-05	6.84e-06	-10.2569	3.52215	-0.840769	TRAF5	TNF receptor-associated factor 5	0.558346
axo09089-f_at	3e-05	4.75e-06	-10.7662	3.92703	-0.840575	USP4	ubiquitin specific protease 4 isoform a	0.558421
axo18525-f_at	0.000145	3.27e-05	-8.30285	1.7895	-0.840265	ZNF574	zinc finger protein 574	0.558541
axo17641-r_at	2.21e-05	3.24e-06	-11.3213	4.3494	-0.839155	LRRC47	leucine rich repeat containing 47	0.558971
axo05220-r_at	1.97e-05	2.8e-06	-11.545	4.5144	-0.838536	PDE4D	cAMP-specific phosphodiesterase 4D isoform 1	0.559211
axo07814-f_at	0.00462	0.00186	-4.54942	-2.64594	-0.83827	FCN1	ficolin 1 precursor	0.559314
axo06821-f_at	8.12e-06	8.98e-07	-13.3874	5.7721	-0.837473	ZDHHC7	zinc finger, DHHC-type containing 7 isoform 1	0.559623
axo04593-f_at	4e-06	3.53e-07	-15.1008	6.80422	-0.837334	ETV4	ets variant gene 4 (E1A enhancer binding protein, E1AF)	0.559677
axo17227-f_at	9.01e-06	1.02e-06	-13.1624	5.62743	-0.837279	ING3	inhibitor of growth family, member 3 isoform 1	0.559698
axo05764-f_at	1.23e-05	1.52e-06	-12.5039	5.19035	-0.836969	SYTL4	synaptotagmin-like 4	0.559818
axo07014-r_at	5.01e-06	4.75e-07	-14.5348	6.47614	-0.836867	C1QBP	complement component 1, q subcomponent binding protein precursor	0.559858
axo14096-r_at	0.00043	0.000118	-6.93274	0.367177	-0.836213	TSC22D2	TSC22 domain family, member 2	0.560112
axo01906-f_at	1.85e-05	2.57e-06	-11.6741	4.60829	-0.83523	H1FOO	H1 histone family, member O, oocyte-specific	0.560494
axo16681-r_at	2.53e-05	3.84e-06	-11.0714	4.16158	-0.834624	TIAM2	T-cell lymphoma invasion and metastasis 2 isoform b	0.560729
axo18589-f_at	1.54e-05	2.06e-06	-12.0145	4.85149	-0.834332	PAPOLG	poly(A) polymerase gamma	0.560843
axo17442-r_at	0.000108	2.29e-05	-8.71592	2.18208	-0.832714	KIF15	kinesin family member 15	0.561472
axo16622-r_at	0.000175	4.08e-05	-8.0524	1.54377	-0.831877	KLHL11	kelch-like 11	0.561798
axo02813-f_at	2.37e-05	3.55e-06	-11.1888	4.25028	-0.831798	HEATR3	HEAT repeat containing 3	0.561829
axo20981-f_s_at	1.06e-05	1.26e-06	-12.8094	5.39568	-0.831552	NONO	non-POU domain containing, octamer-binding isoform 1	0.561925
axo20032-r_at	0.000412	0.000113	-6.98226	0.422105	-0.831218	USP32	ubiquitin specific protease 32	0.562055
axo19505-r_at	9.12e-06	1.04e-06	-13.1384	5.61186	-0.830691	ISG20L2	interferon stimulated exonuclease gene 20kDa-like 2	0.56226
axo06390-f_at	0.000301	7.8e-05	-7.35646	0.828193	-0.830562	APLP2	amyloid beta (A4) precursor-like protein 2 isoform 3	0.56231
axo10976-r_at	3.78e-05	6.3e-06	-10.3704	3.61386	-0.830171	HAS2	hyaluronan synthase 2	0.562463
axo18131-f_at	2.12e-05	3.09e-06	-11.3955	4.40443	-0.829377	PELI2	pellino 2	0.562772
axo19683-f_at	4.97e-06	4.72e-07	-14.5486	6.48432	-0.828921	CCNB1	cyclin B1	0.56295
axo19483-f_at	2.01e-06	1.42e-07	-16.9741	7.81118	-0.828229	TMEM49	transmembrane protein 49	0.56322
axo19666-f_at	0.000578	0.000169	-6.58889	-0.022114	-0.827887	CDCA7	cell division cycle associated 7 isoform 1	0.563354
axo07343-r_at	2.25e-06	1.64e-07	-16.6552	7.64768	-0.827571	IGFBP2	insulin-like growth factor binding protein 2, 36kDa	0.563477
axo15175-f_at	2e-05	2.86e-06	-11.5124	4.49054	-0.827534	PRPF31	pre-mRNA processing factor 31 homolog	0.563492
axo12122-f_at	0.00194	0.000692	-5.33335	-1.57022	-0.827319	IVNS1ABP	influenza virus NS1A binding protein	0.563576
axo09818-f_at	1.02e-05	1.2e-06	-12.8908	5.44967	-0.827151	RAB27B	RAB27B, member RAS oncogene family	0.563641
axo17655-f_at	1.69e-05	2.29e-06	-11.8497	4.73454	-0.827063	DLG3	synapse-associated protein 102 isoform b	0.563676
axo07873-f_at	0.00302	0.00114	-4.92575	-2.11874	-0.826735	GNAQ	guanine nucleotide binding protein (G protein), q polypeptide	0.563804
axo17482-f_at	0.000476	0.000134	-6.81202	0.232098	-0.826728	ANKRD50	ankyrin repeat domain 50	0.563807
axo11526-r_at	2.12e-05	3.09e-06	-11.3938	4.40321	-0.826404	MAP3K5	mitogen-activated protein kinase kinase kinase 5	0.563933
axo00761-f_at	3.65e-06	3.12e-07	-15.3405	6.93963	-0.825816	REP15	RAB15 effector protein	0.564163
axo14221-f_at	7.04e-06	7.48e-07	-13.7069	5.97372	-0.824329	PITRM1	metalloprotease 1	0.564745
axo19058-f_at	0.000307	7.97e-05	-7.33477	0.805081	-0.823923	LPCAT1	acyltransferase like 2	0.564904
axo00732-f_at	7.31e-06	7.85e-07	-13.6216	5.92031	-0.823744	NOM1	nucleolar protein with MIF4G domain 1	0.564974
axo11093-r_at	0.000803	0.000249	-6.22542	-0.449219	-0.82342	SMC3	structural maintenance of chromosomes 3	0.565101
axo21448-f_at	8.56e-06	9.57e-07	-13.2781	5.70212	-0.822723	TPM3	tropomyosin 3 isoform 2	0.565374
axo20151-f_at	0.000159	3.66e-05	-8.17624	1.66602	-0.822241	TMEM209	transmembrane protein 209	0.565563
axo07388-f_at	0.000107	2.27e-05	-8.72652	2.19195	-0.822197	IRF3	interferon regulatory factor 3	0.56558
axo11332-f_at	2.06e-05	2.97e-06	-11.4555	4.44873	-0.821593	KIF20A	kinesin family member 20A	0.565817
axo18712-r_at	1.42e-05	1.85e-06	-12.1843	4.97049	-0.820395	DCTPP1	dCTP pyrophosphatase 1	0.566287
axo18771-f_at	4.41e-06	4.03e-07	-14.848	6.65917	-0.820243	DSC2	desmocollin 2 isoform Dsc2a preproprotein	0.566347
axo14105-r_at	9.8e-05	2.04e-05	-8.85639	2.31213	-0.820126	MELK	maternal embryonic leucine zipper kinase	0.566392
axo14380-f_at	3.13e-06	2.57e-07	-15.726	7.15311	-0.820075	TMCC1	transmembrane and coiled-coil domain family 1 isoform b	0.566413
axo07585-f_at	5.9e-06	5.92e-07	-14.1276	6.23254	-0.819963	CD69	CD69 molecule	0.566456
axo06584-f_at	4.48e-06	4.12e-07	-14.8047	6.63406	-0.819663	RBM24	RNA binding motif protein 24 isoform 1	0.566574
axo18356-f_at	2.49e-06	1.88e-07	-16.3711	7.49939	-0.819096	IFIH1	interferon induced with helicase C domain 1	0.566797
axo08257-f_s_at	2.99e-06	2.41e-07	-15.8552	7.22356	-0.81844	NASP	nuclear autoantigenic sperm protein isoform 2	0.567055
axo09180-f_at	0.000676	0.000203	-6.41366	-0.225978	-0.817688	USP7	ubiquitin specific peptidase 7	0.56735
axo16906-f_at	0.000355	9.48e-05	-7.15627	0.612887	-0.816902	TMEM63B	transmembrane protein 63B	0.567659
axo07135-f_at	3.64e-06	3.11e-07	-15.3483	6.944	-0.81639	DAPK3	death-associated protein kinase 3	0.567861
axo14358-f_at	1.41e-05	1.83e-06	-12.2065	4.98589	-0.81593	SPEN	spen homolog, transcriptional regulator	0.568042
axo11853-f_at	1.66e-05	2.25e-06	-11.8794	4.75572	-0.815873	PPARD	peroxisome proliferative activated receptor, delta isoform 1	0.568065
axo17146-r_at	9.43e-06	1.08e-06	-13.063	5.56273	-0.81577	FBXW5	F-box and WD repeat domain containing 5	0.568105
axo16816-r_at	3.44e-06	2.9e-07	-15.4879	7.02187	-0.815561	GIMAP4	GTPase, IMAP family member 4	0.568188
axo11409-f_at	0.000894	0.000282	-6.11232	-0.585513	-0.814988	USPL1	ubiquitin specific peptidase like 1	0.568413
axo04770-f_at	3.39e-05	5.54e-06	-10.55	3.7572	-0.814869	TMEM120B	transmembrane protein 120B	0.56846
axo01768-f_at	1.68e-05	2.28e-06	-11.8547	4.73813	-0.814073	TMPO	thymopoietin isoform beta	0.568774
axo20673-f_at	3.67e-05	6.07e-06	-10.4221	3.65535	-0.813886	SFRS3	splicing factor, arginine/serine-rich 3	0.568847
axo19788-r_at	4.84e-05	8.55e-06	-9.95632	3.27489	-0.81383	PHF20L1	PHD finger protein 20-like 1 isoform 2	0.56887
axo02253-f_at	0.000128	2.83e-05	-8.46919	1.94944	-0.812393	YIPF6	Yip1 domain family, member 6	0.569436
axo01311-f_at	0.000141	3.18e-05	-8.33594	1.82151	-0.81174	ARHGEF7	PAK-interacting exchange factor beta isoform b	0.569694
axo14647-f_at	0.0015	0.000515	-5.58166	-1.24742	-0.811472	GPD1L	glycerol-3-phosphate dehydrogenase 1-like	0.5698
axo14675-f_at	4.94e-06	4.66e-07	-14.5719	6.49801	-0.811297	ACSBG1	lipidosin	0.569869
axo00959-f_at	6.23e-05	1.16e-05	-9.55343	2.9332	-0.810274	PPTC7	T-cell activation protein phosphatase 2C	0.570273
axo04537-f_at	0.000133	2.95e-05	-8.42187	1.9042	-0.810026	HNRNPC	heterogeneous nuclear ribonucleoprotein C isoform b	0.570372
axo20258-f_at	7.63e-06	8.29e-07	-13.5262	5.86021	-0.80994	CCNB3	cyclin B3 isoform 3	0.570406
axo09088-f_at	2.32e-05	3.46e-06	-11.2267	4.27876	-0.80981	USP4	ubiquitin specific protease 4 isoform a	0.570457
axo06322-f_at	0.00037	9.96e-05	-7.10706	0.559279	-0.808607	TMEM51	transmembrane protein 51	0.570933
axo08897-f_at	4e-06	3.54e-07	-15.0946	6.8007	-0.807613	STX5	syntaxin 5	0.571326
axo19851-f_s_at	4.4e-06	4.01e-07	-14.8564	6.66405	-0.807512	HSDL2	hydroxysteroid dehydrogenase like 2	0.571366
axo07152-f_at	5.71e-06	5.66e-07	-14.2118	6.28341	-0.806664	DKC1	dyskerin isoform 1	0.571702
axo12451-f_at	8.65e-06	9.7e-07	-13.2544	5.68684	-0.805435	ANXA2	annexin A2 isoform 1	0.57219
axo13816-f_at	0.000224	5.47e-05	-7.73142	1.2199	-0.805389	TNRC6A	trinucleotide repeat containing 6A	0.572208
axo07099-f_at	7.39e-05	1.44e-05	-9.2818	2.69584	-0.805381	CLDN4	claudin 4	0.572211
axo10426-r_at	0.000152	3.47e-05	-8.23592	1.7244	-0.805191	COPB2	coatomer protein complex, subunit beta 2 (beta prime)	0.572286
axo20277-f_at	5.14e-06	4.92e-07	-14.4709	6.43834	-0.805139	ALG2	alpha-1,3-mannosyltransferase ALG2	0.572307
axo08446-r_at	0.000578	0.000169	-6.58923	-0.021719	-0.804206	PPM1G	protein phosphatase 1G	0.572677
axo06485-r_at	0.0147	0.00694	-3.60027	-4.05997	-0.80391	ATRX	transcriptional regulator ATRX isoform 1	0.572795
axo12967-f_at	0.000648	0.000194	-6.45845	-0.173508	-0.803642	CHORDC1	cysteine and histidine-rich domain-containing protein 1 isoform a	0.572901
axo21553-f_at	2.58e-05	3.93e-06	-11.0382	4.13632	-0.803466	TMEM44	transmembrane protein 44 isoform a	0.572971
axo09893-f_at	1.48e-05	1.95e-06	-12.1027	4.91347	-0.802273	SEMA4F	semaphorin W	0.573445
axo04236-r_at	2.63e-06	2.03e-07	-16.2159	7.41732	-0.801252	YARS2	tyrosyl-tRNA synthetase 2, mitochondrial	0.573851
axo05395-f_at	0.000197	4.73e-05	-7.89091	1.38211	-0.800845	MVK	mevalonate kinase	0.574013
axo15915-f_at	0.000282	7.19e-05	-7.44113	0.917945	-0.800798	TNFRSF12A	tumor necrosis factor receptor superfamily, member 12A	0.574031
axo05310-f_at	2.21e-05	3.25e-06	-11.3173	4.34642	-0.800712	TAT	tyrosine aminotransferase	0.574066
axo12941-f_s_at	2e-05	2.85e-06	-11.5146	4.49217	-0.799502	PRDX5	peroxiredoxin 5 isoform a precursor	0.574547
axo08470-f_at	0.000291	7.49e-05	-7.39945	0.873866	-0.7994	PRKAG1	AMP-activated protein kinase, noncatalytic gamma-1 subunit isoform 1	0.574588
axo13272-f_at	6.49e-05	1.23e-05	-9.48145	2.87086	-0.79927	DNAJC15	DNAJ domain-containing	0.57464
axo01563-r_at	0.000104	2.2e-05	-8.76622	2.22885	-0.799192	BTNL9	butyrophilin-like 9	0.574671
axo16011-f_at	1.44e-05	1.89e-06	-12.1502	4.94672	-0.798314	CDC42BPG	CDC42 binding protein kinase gamma (DMPK-like)	0.575021
axo01158-f_at	0.00072	0.000219	-6.34234	-0.310033	-0.797671		RAN binding protein 3-like	0.575277
axo18314-f_at	6.26e-06	6.41e-07	-13.9853	6.14582	-0.797581	CARS	cysteinyl-tRNA synthetase isoform c	0.575313
axo19414-r_at	3e-06	2.43e-07	-15.8425	7.2167	-0.796562	HM13	minor histocompatibility antigen 13 isoform 1	0.57572
axo16046-r_at	2.5e-06	1.89e-07	-16.3601	7.49357	-0.796354	PARP14	poly (ADP-ribose) polymerase family, member 14	0.575803
axo06411-f_at	0.000145	3.28e-05	-8.30115	1.78784	-0.79587	CMKLR1	chemokine-like receptor 1 isoform a	0.575996
axo13263-f_at	8.17e-05	1.64e-05	-9.12488	2.55604	-0.795775	FLRT2	fibronectin leucine rich transmembrane protein 2	0.576034
axo07832-r_at	4.27e-06	3.86e-07	-14.9294	6.70611	-0.795447	FRK	fyn-related kinase	0.576164
axo09902-r_at	0.000274	6.95e-05	-7.47775	0.956526	-0.795389	PNLIP	pancreatic lipase precursor	0.576188
axo15074-f_at	7.22e-05	1.4e-05	-9.3181	2.7279	-0.795008	SFRS18	splicing factor, arginine/serine-rich 130	0.57634
axo11987-f_at	2.52e-05	3.83e-06	-11.0751	4.16439	-0.794986	SLC30A9	solute carrier family 30 (zinc transporter), member 9	0.576349
axo10345-f_at	0.018	0.0087	-3.44567	-4.30021	-0.794889	LATS1	LATS homolog 1	0.576387
axo02595-r_at	3.21e-06	2.66e-07	-15.6561	7.11479	-0.794562	RFC2	replication factor C 2 isoform 1	0.576518
axo16976-r_at	3.19e-05	5.14e-06	-10.654	3.83929	-0.794533	MCM10	minichromosome maintenance complex component 10 isoform 2	0.57653
axo00022-f_at	0.000539	0.000155	-6.67002	0.071005	-0.793947	KRAS	c-K-ras2 protein isoform a precursor	0.576764
axo11779-f_at	3.23e-06	2.69e-07	-15.6398	7.10582	-0.793809	NFYB	nuclear transcription factor Y, beta	0.576819
axo00526-f_at	0.00057	0.000165	-6.60869	0.000691	-0.793447	MYOF	myoferlin isoform b	0.576964
axo10048-f_at	0.00991	0.00441	-3.9159	-3.57727	-0.793043	DSP	desmoplakin isoform I	0.577126
axo18435-f_at	6.35e-06	6.54e-07	-13.947	6.12229	-0.792677		tetratricopeptide repeat domain 31	0.577272
axo02636-f_at	4.25e-06	3.83e-07	-14.9422	6.71351	-0.792237	METTL2A	methyltransferase like 2A	0.577448
axo11194-r_at	0.00118	0.000391	-5.82027	-0.945157	-0.792183	LGALS3BP	galectin 3 binding protein	0.577469
axo12561-r_at	0.000116	2.49e-05	-8.6197	2.092	-0.79129	SILV	silver homolog	0.577827
axo06544-f_at	1.34e-05	1.7e-06	-12.3182	5.06322	-0.791279	SLC25A39	solute carrier family 25, member 39 isoform a	0.577832
axo07783-f_at	1.11e-05	1.35e-06	-12.6972	5.32082	-0.789717	EVPL	envoplakin	0.578458
axo03320-f_at	1.04e-05	1.23e-06	-12.8468	5.42051	-0.78925	PLEC1	plectin 1 isoform 11	0.578645
axo00034-f_at	0.000275	7e-05	-7.46924	0.947574	-0.789054	TNKS1BP1	tankyrase 1-binding protein 1	0.578724
axo18964-r_at	7.24e-05	1.41e-05	-9.31201	2.72253	-0.788953	MUC16	mucin 16	0.578764
axo08468-f_at	0.00408	0.00161	-4.6582	-2.49151	-0.788163	PRKACA	cAMP-dependent protein kinase catalytic subunit alpha isoform 1	0.579081
axo04847-f_at	3.25e-05	5.23e-06	-10.6285	3.81925	-0.787389	C10orf26	hypothetical protein LOC54838 isoform 1	0.579392
axo16246-f_at	9.75e-05	2.03e-05	-8.86449	2.31957	-0.787254	PXK	PX domain containing serine/threonine kinase	0.579446
axo11688-f_at	0.000171	3.99e-05	-8.0793	1.57045	-0.787171	SEMA3A	semaphorin 3A precursor	0.579479
axo14156-f_at	5.11e-05	9.17e-06	-9.86422	3.19785	-0.786757	LBA1	lupus brain antigen 1	0.579646
axo08222-r_at	0.000277	7.04e-05	-7.46422	0.942283	-0.786565	MUC5B	mucin 5, subtype B, tracheobronchial	0.579723
axo15360-f_at	7.45e-06	8.04e-07	-13.5811	5.89484	-0.786442	C3orf32	hypothetical protein LOC51066	0.579772
axo11214-f_at	1.58e-05	2.12e-06	-11.9705	4.82043	-0.786393	MRE11A	meiotic recombination 11 homolog A isoform 1	0.579792
axo02704-f_at	8.21e-05	1.65e-05	-9.11719	2.54914	-0.786319	ZFAND2A	zinc finger, AN1-type domain 2A	0.579822
axo07054-f_at	4.24e-06	3.82e-07	-14.9505	6.71826	-0.785176	CDK9	cyclin-dependent kinase 9	0.580281
axo11424-f_at	7.52e-06	8.14e-07	-13.5593	5.88114	-0.784775	M6PRBP1	mannose 6 phosphate receptor binding protein 1	0.580442
axo17267-f_at	1.13e-05	1.37e-06	-12.6719	5.30381	-0.784721	YLPM1	YLP motif containing 1	0.580464
axo10085-r_at	1.52e-05	2.01e-06	-12.0521	4.87795	-0.784592	PRIM1	DNA primase polypeptide 1	0.580516
axo01219-r_at	0.000191	4.55e-05	-7.93292	1.42441	-0.784442	FAM84A	family with sequence similarity 84, member A	0.580576
axo01424-f_at	4.83e-05	8.53e-06	-9.96013	3.27807	-0.784413	NCAPH2	kleisin beta isoform 2	0.580588
axo08748-f_at	5.41e-05	9.84e-06	-9.77141	3.11957	-0.783964	DCK	deoxycytidine kinase	0.580769
axo18582-f_at	4.56e-06	4.22e-07	-14.7594	6.6078	-0.783322	CBFB	core-binding factor, beta subunit isoform 1	0.581027
axo09570-f_at	0.000744	0.000228	-6.30717	-0.351716	-0.782667	IQGAP1	IQ motif containing GTPase activating protein 1	0.581291
axo10741-f_at	5.42e-05	9.86e-06	-9.76847	3.11708	-0.782643	TPD52	tumor protein D52 isoform 3	0.581301
axo07534-f_at	1.84e-05	2.55e-06	-11.6847	4.61599	-0.782187	BMP7	bone morphogenetic protein 7 precursor	0.581485
axo20191-f_at	6.31e-06	6.47e-07	-13.9671	6.13462	-0.782045	DISP1	dispatched A	0.581542
axo09408-f_at	8.8e-05	1.79e-05	-9.01239	2.45458	-0.781309	PPAP2C	phosphatidic acid phosphatase type 2C isoform 1	0.581839
axo03327-f_at	0.000453	0.000126	-6.8702	0.29741	-0.780954	RASSF6	Ras association (RalGDS/AF-6) domain family 6 isoform b	0.581982
axo20926-f_s_at	4.59e-06	4.26e-07	-14.7412	6.59716	-0.780641	IFITM3	interferon-induced transmembrane protein 3 (1-8U)	0.582108
axo13342-f_at	5.82e-06	5.81e-07	-14.1629	6.2539	-0.780237	BLNK	B-cell linker isoform 1	0.582271
axo18165-r_at	4.35e-05	7.54e-06	-10.1248	3.41425	-0.779543	MAD1L1	MAD1-like 1 protein	0.582551
axo14365-f_at	1.52e-05	2.02e-06	-12.0473	4.87457	-0.779029	SPEN	spen homolog, transcriptional regulator	0.582759
axo02772-f_at	4.33e-05	7.5e-06	-10.133	3.42098	-0.778972	ANKDD1A	ankyrin repeat and death domain containing 1A	0.582782
axo04974-f_at	5.2e-06	4.99e-07	-14.4444	6.42265	-0.778933	TMBIM6	testis enhanced gene transcript (BAX inhibitor 1) isoform 2	0.582798
axo06474-f_at	4.24e-06	3.82e-07	-14.9504	6.7182	-0.778776	EFTUD2	elongation factor Tu GTP binding domain containing 2 isoform b	0.582861
axo18699-f_at	0.00154	0.000528	-5.56093	-1.27405	-0.778412	PRRG4	proline rich Gla (G-carboxyglutamic acid) 4 (transmembrane)	0.583008
axo18172-f_at	0.000357	9.56e-05	-7.14787	0.603759	-0.777586	ADAM28	ADAM metallopeptidase domain 28 isoform 3 preproprotein	0.583342
axo13843-f_at	3.75e-05	6.26e-06	-10.3798	3.62146	-0.77757	TMOD3	tropomodulin 3 (ubiquitous)	0.583348
axo09420-f_at	1.97e-05	2.79e-06	-11.5452	4.51453	-0.776307	IL1R1	interleukin 1 receptor, type I precursor	0.583859
axo05563-f_at	0.00062	0.000183	-6.50951	-0.113994	-0.776246	CDCA7L	cell division cycle associated 7-like isoform 3	0.583884
axo02985-f_at	0.000301	7.78e-05	-7.35971	0.831654	-0.77529	VHL	von Hippel-Lindau tumor suppressor isoform 2	0.584271
axo11068-f_at	9.16e-06	1.04e-06	-13.128	5.60507	-0.77526	TECTA	tectorin alpha precursor	0.584283
axo13778-f_at	2.83e-05	4.39e-06	-10.8781	4.01367	-0.772704	TNFRSF21	tumor necrosis factor receptor superfamily, member 21 precursor	0.585319
axo14538-f_at	0.00034	9e-05	-7.20986	0.670959	-0.772562	SIPA1L3	signal-induced proliferation-associated 1 like 3	0.585377
axo02467-f_at	2.97e-06	2.39e-07	-15.8791	7.23653	-0.7723	ZNF598	zinc finger protein 598	0.585483
axo12857-f_at	9.3e-06	1.07e-06	-13.0932	5.58244	-0.772199	STRADA	protein kinase LYK5 isoform 1	0.585524
axo14546-r_at	4.07e-05	6.9e-06	-10.2447	3.51223	-0.772111	MRPS27	mitochondrial ribosomal protein S27	0.58556
axo00789-f_at	2.86e-05	4.45e-06	-10.8586	3.99865	-0.771992	KIF23	kinesin family member 23 isoform 1	0.585608
axo20265-f_at	3.09e-06	2.53e-07	-15.763	7.17334	-0.771649	HIAT1	hippocampus abundant transcript 1	0.585748
axo12836-f_at	3.56e-06	3.03e-07	-15.4008	6.97334	-0.770856	ACOT7	acyl-CoA thioesterase 7 isoform hBACHa	0.586069
axo16321-r_at	7.01e-05	1.35e-05	-9.36488	2.76906	-0.770337	TRNAU1AP	tRNA selenocysteine associated protein 1	0.58628
axo10169-r_at	1.13e-05	1.37e-06	-12.6771	5.30734	-0.770081	MCM2	minichromosome maintenance complex component 2	0.586385
axo12316-f_at	2.35e-05	3.52e-06	-11.2011	4.25951	-0.769998	USP19	ubiquitin specific peptidase 19	0.586418
axo03630-f_at	3.29e-06	2.75e-07	-15.5944	7.0808	-0.769807	CHCHD10	coiled-coil-helix-coiled-coil-helix domain containing 10	0.586496
axo02052-f_at	5.16e-05	9.31e-06	-9.8442	3.18101	-0.769579	TGIF1	TG-interacting factor isoform b	0.586588
axo04865-f_at	4.22e-05	7.25e-06	-10.1787	3.45839	-0.769562	MRAS	muscle RAS oncogene homolog	0.586595
axo12136-r_at	3.82e-05	6.4e-06	-10.348	3.59586	-0.769385	RAD51AP1	RAD51 associated protein 1 isoform b	0.586668
axo14948-f_at	0.00073	0.000223	-6.32716	-0.328006	-0.76928	SUZ12	joined to JAZF1	0.58671
axo16874-r_at	1.03e-05	1.21e-06	-12.8787	5.44163	-0.768951	STRBP	spermatid perinuclear RNA binding protein	0.586844
axo01368-f_at	0.00241	0.000886	-5.1302	-1.84068	-0.768927	BOD1L	biorientation of chromosomes in cell division 1-like	0.586854
axo12374-f_at	0.000148	3.36e-05	-8.27175	1.7593	-0.768171	MCM5	minichromosome maintenance complex component 5	0.587161
axo21399-f_at	2.79e-05	4.33e-06	-10.8982	4.02919	-0.767881	NEK7	NIMA-related kinase 7	0.587279
axo07943-f_at	3.48e-05	5.69e-06	-10.5117	3.72684	-0.76765	HSD17B2	hydroxysteroid (17-beta) dehydrogenase 2	0.587373
axo12988-f_at	4.05e-06	3.6e-07	-15.061	6.78155	-0.767644	MED15	mediator complex subunit 15 isoform a	0.587376
axo21092-f_at	7.45e-06	8.04e-07	-13.5794	5.89376	-0.767351	GADD45B	growth arrest and DNA-damage-inducible, beta	0.587495
axo02051-f_at	0.000309	8.02e-05	-7.32846	0.798347	-0.767137	NR4A3	nuclear receptor subfamily 4, group A, member 3 isoform b	0.587583
axo01255-r_at	3.79e-05	6.33e-06	-10.3647	3.60928	-0.767088	C1orf96	hypothetical protein LOC126731	0.587602
axo05364-r_at	0.000214	5.19e-05	-7.7896	1.27937	-0.767014	LIMA1	LIM domain and actin binding 1 isoform a	0.587633
axo08608-f_at	4.81e-06	4.5e-07	-14.636	6.53568	-0.766202	ALDH18A1	pyrroline-5-carboxylate synthetase isoform 1	0.587963
axo18189-f_at	2.9e-05	4.54e-06	-10.8315	3.9777	-0.766064	CDC25B	cell division cycle 25B isoform 1	0.58802
axo03840-f_at	0.037	0.0198	-2.90075	-5.16094	-0.765814		PREDICTED: similar to zinc finger protein 316	0.588121
axo02670-r_at	0.000148	3.36e-05	-8.27365	1.76115	-0.765242	APAF1	apoptotic peptidase activating factor 1 isoform c	0.588355
axo00360-f_at	4.56e-05	7.99e-06	-10.0472	3.35031	-0.763852		AP1 gamma subunit binding protein 1 isoform 2	0.588922
axo12124-f_at	0.000227	5.58e-05	-7.71021	1.19814	-0.763851	TRIM16	tripartite motif-containing 16	0.588922
axo13625-f_at	4.41e-06	4.03e-07	-14.8479	6.65913	-0.763821	HABP4	hyaluronan binding protein 4	0.588934
axo07584-r_at	1.46e-05	1.91e-06	-12.1317	4.93378	-0.763264	IL8RA	interleukin 8 receptor alpha	0.589162
axo11087-f_at	1.77e-05	2.43e-06	-11.7586	4.6693	-0.763048	CHAF1B	chromatin assembly factor 1 subunit B	0.58925
axo05253-f_at	4.88e-06	4.59e-07	-14.6011	6.51519	-0.762861	MYBBP1A	MYB binding protein 1a isoform 1	0.589327
axo11205-f_at	1.19e-05	1.46e-06	-12.5715	5.23614	-0.762506	LMNB1	lamin B1	0.589472
axo14717-r_at	3.23e-05	5.2e-06	-10.6376	3.82635	-0.761482	VPS13A	vacuolar protein sorting 13A isoform B	0.58989
axo05472-r_at	0.000506	0.000144	-6.73998	0.150675	-0.76094	AP1B1	adaptor-related protein complex 1 beta 1 subunit isoform a	0.590112
axo18583-f_at	5.33e-06	5.16e-07	-14.3824	6.38575	-0.760878	IFI6	interferon, alpha-inducible protein 6 isoform c	0.590137
axo10046-f_at	0.000627	0.000186	-6.49807	-0.127306	-0.760572	DYNC1I1	dynein, cytoplasmic 1, intermediate chain 1 isoform a	0.590262
axo01418-f_at	6.07e-06	6.13e-07	-14.0645	6.19414	-0.760234	ARRDC1	arrestin domain containing 1	0.590401
axo01067-r_at	4.94e-05	8.78e-06	-9.92128	3.24565	-0.760118	DHRS13	dehydrogenase/reductase (SDR family) member 13	0.590448
axo08778-f_at	0.00489	0.00198	-4.50249	-2.71307	-0.759392	SLC2A5	solute carrier family 2 (facilitated glucose/fructose transporter), member 5 isoform 1	0.590745
axo19909-f_at	6.99e-06	7.39e-07	-13.7287	5.98729	-0.759178	ELOF1	elongation factor 1 homolog (ELF1, S. cerevisiae)	0.590833
axo08174-f_at	4.94e-05	8.78e-06	-9.92115	3.24554	-0.758946	MMP1	matrix metalloproteinase 1 isoform 1 preproprotein	0.590928
axo01582-f_at	0.00137	0.000463	-5.67197	-1.13211	-0.758776	SPRED1	sprouty-related protein 1 with EVH-1 domain	0.590997
axo16338-r_at	8.64e-06	9.67e-07	-13.259	5.6898	-0.75741	C4orf27	hypothetical protein LOC54969	0.591557
axo18784-f_at	0.00012	2.59e-05	-8.57185	2.0469	-0.756993	FYCO1	FYVE and coiled-coil domain containing 1	0.591728
axo17775-f_at	0.000571	0.000166	-6.60583	-0.002603	-0.756854	TMEM181	G protein-coupled receptor 178	0.591785
axo13092-f_at	0.000145	3.27e-05	-8.30424	1.79084	-0.756812	FBXW11	F-box and WD repeat domain containing 11 isoform C	0.591802
axo06466-f_at	1.79e-05	2.46e-06	-11.7392	4.65533	-0.756658	CLP1	ATP/GTP-binding protein isoform 2	0.591866
axo05207-f_at	2.67e-05	4.1e-06	-10.9758	4.08874	-0.755518	NTF3	neurotrophin 3 isoform 1 preproprotein	0.592334
axo14359-r_at	0.000199	4.76e-05	-7.88217	1.37329	-0.755251	SPEN	spen homolog, transcriptional regulator	0.592443
axo11416-r_at	3.86e-06	3.39e-07	-15.1824	6.85056	-0.754579	DDX39	DEAD (Asp-Glu-Ala-Asp) box polypeptide 39	0.59272
axo18164-f_at	4.48e-06	4.11e-07	-14.809	6.63657	-0.754482	AVPI1	vasopressin-induced protein, 32kDa	0.592759
axo03329-f_at	6.09e-06	6.17e-07	-14.0545	6.18809	-0.754363	RAB5C	RAB5C, member RAS oncogene family isoform a	0.592808
axo00106-r_at	0.000369	9.95e-05	-7.10785	0.560143	-0.754265	CTDP1	CTD (carboxy-terminal domain, RNA polymerase II, polypeptide A) phosphatase, subunit 1 isoform FCP1b	0.592848
axo08564-r_at	0.000833	0.00026	-6.18474	-0.498054	-0.754192	PTPN4	protein tyrosine phosphatase, non-receptor type 4	0.592879
axo18425-r_at	0.000159	3.66e-05	-8.17649	1.66627	-0.754053	TMEM168	transmembrane protein 168	0.592936
axo16974-r_at	9.32e-06	1.07e-06	-13.0863	5.57796	-0.753933	LRRC59	leucine rich repeat containing 59	0.592985
axo14672-f_at	1.58e-05	2.12e-06	-11.9699	4.81998	-0.753905	ACSBG1	lipidosin	0.592996
axo12030-f_at	0.000217	5.29e-05	-7.76866	1.25801	-0.753845	IPO7	importin 7	0.593021
axo14389-f_at	0.00266	0.000989	-5.04199	-1.95992	-0.753384	KDM4B	jumonji domain containing 2B	0.593211
axo15629-f_at	0.00034	9.01e-05	-7.20878	0.66979	-0.751584	CYB5R4	cytochrome b5 reductase 4	0.593951
axo12547-f_at	8.17e-06	9.04e-07	-13.3763	5.76503	-0.751544	RAC1	ras-related C3 botulinum toxin substrate 1 isoform Rac1	0.593967
axo08253-f_at	2.34e-05	3.49e-06	-11.2147	4.26971	-0.751058	TSPO	translocator protein isoform PBR	0.594168
axo19795-f_at	4.18e-05	7.16e-06	-10.1953	3.47199	-0.750951	MFSD7	major facilitator superfamily domain containing 7	0.594212
axo05737-r_at	0.0447	0.0245	-2.76159	-5.3824	-0.750755	SRRT	arsenate resistance protein 2 isoform e	0.594292
axo20127-r_at	6.96e-06	7.34e-07	-13.7417	5.99537	-0.750089	FAM136A	hypothetical protein LOC84908	0.594567
axo14726-r_at	0.00203	0.000729	-5.28974	-1.62779	-0.749881	DNAJC9	DnaJ homolog, subfamily C, member 9	0.594653
axo12174-f_at	0.000161	3.72e-05	-8.15544	1.64558	-0.749291	TFPI2	tissue factor pathway inhibitor 2	0.594896
axo10838-f_at	7.76e-05	1.53e-05	-9.20597	2.62853	-0.749065	USP10	ubiquitin specific protease 10	0.594989
axo11716-r_at	3.69e-05	6.12e-06	-10.4102	3.64582	-0.748803	NDC80	kinetochore associated 2	0.595097
axo12543-r_at	1.7e-05	2.32e-06	-11.8295	4.72011	-0.748385	IDH3B	isocitrate dehydrogenase 3, beta subunit isoform a precursor	0.59527
axo09183-f_at	7.06e-05	1.36e-05	-9.35484	2.76024	-0.747636	STAM	signal transducing adaptor molecule 1	0.595579
axo20505-f_at	8.02e-05	1.6e-05	-9.15522	2.58322	-0.746847	CTBP2	C-terminal binding protein 2 isoform 1	0.595904
axo05071-f_at	2.19e-05	3.2e-06	-11.3407	4.36386	-0.746665	CYP4B1	cytochrome P450, family 4, subfamily B, polypeptide 1 isoform a	0.59598
axo02374-r_at	8.91e-06	1.01e-06	-13.1858	5.64254	-0.746367	AGR3	breast cancer membrane protein 11	0.596103
axo14725-f_at	0.000163	3.77e-05	-8.14246	1.63282	-0.745225	TBC1D12	TBC1 domain family, member 12	0.596575
axo05252-f_at	0.00108	0.000351	-5.91502	-0.827241	-0.744755	MYBBP1A	MYB binding protein 1a isoform 1	0.596769
axo12035-f_at	8.77e-06	9.87e-07	-13.2237	5.66705	-0.744609	RNASEH2A	ribonuclease H2, large subunit	0.59683
axo17549-r_at	6.04e-06	6.09e-07	-14.0771	6.20184	-0.744091	DDX24	DEAD (Asp-Glu-Ala-Asp) box polypeptide 24	0.597044
axo08595-f_at	1.02e-05	1.19e-06	-12.902	5.45705	-0.743819	PTPRZ1	protein tyrosine phosphatase, receptor-type, zeta1 precursor	0.597156
axo13224-f_at	0.000624	0.000185	-6.5028	-0.121794	-0.743811	SSBP2	single-stranded DNA binding protein 2	0.59716
axo10610-r_at	6.96e-06	7.34e-07	-13.7413	5.99512	-0.743339	DNM2	dynamin 2 isoform 3	0.597355
axo00182-r_at	6.99e-06	7.4e-07	-13.7269	5.98618	-0.742763	ADAR	adenosine deaminase, RNA-specific isoform d	0.597594
axo07456-r_at	9.24e-06	1.06e-06	-13.1064	5.59103	-0.742339	APCS	serum amyloid P component precursor	0.597769
axo05747-f_at	0.00074	0.000226	-6.31308	-0.344697	-0.74212	CYP2C18	cytochrome P450 family 2 subfamily C polypeptide 18 isoform 2	0.59786
axo13874-f_at	3.11e-05	4.95e-06	-10.7076	3.88127	-0.742	EXT1	exostosin 1	0.59791
axo16087-f_at	0.000636	0.000189	-6.48054	-0.147717	-0.74188	ZCCHC8	zinc finger, CCHC domain containing 8	0.59796
axo15740-r_at	4.16e-05	7.12e-06	-10.2026	3.47798	-0.741679	CENPF	centromere protein F	0.598043
axo00700-r_at	1.28e-05	1.61e-06	-12.4114	5.12726	-0.74157	RRM2	ribonucleotide reductase M2 polypeptide	0.598088
axo13441-r_at	0.000146	3.29e-05	-8.29512	1.782	-0.74123	SACM1L	suppressor of actin 1	0.598229
axo01943-r_at	4.16e-05	7.13e-06	-10.2018	3.47733	-0.74071	RASSF1	Ras association domain family 1 isoform D	0.598445
axo07946-f_at	4.08e-05	6.94e-06	-10.2385	3.50715	-0.740093	HSPE1	heat shock 10kDa protein 1	0.598701
axo01727-r_at	9.79e-06	1.13e-06	-12.9871	5.51308	-0.739876	CPNE1	copine I isoform a	0.598791
axo02524-f_at	9.7e-06	1.12e-06	-13.0025	5.52318	-0.739833	HM13	minor histocompatibility antigen 13 isoform 4	0.598809
axo01020-r_at	0.000178	4.17e-05	-8.02833	1.51983	-0.739294	ARHGAP5	Rho GTPase activating protein 5 isoform a	0.599032
axo10692-r_s_at	1.82e-05	2.53e-06	-11.6979	4.62549	-0.73927	PFN1	profilin 1	0.599042
axo12903-f_at	4.69e-06	4.37e-07	-14.6942	6.56977	-0.739166	NCBP2	nuclear cap binding protein subunit 2, 20kDa isoform 1	0.599086
axo08690-f_at	0.00019	4.53e-05	-7.93861	1.43013	-0.73894	CBS	cystathionine-beta-synthase	0.59918
axo03091-f_at	5.16e-05	9.3e-06	-9.84614	3.18264	-0.737774	PHF20L1	PHD finger protein 20-like 1 isoform 3	0.599664
axo12557-f_at	1.13e-05	1.37e-06	-12.6719	5.30381	-0.737388	SFRS5	splicing factor, arginine/serine-rich 5	0.599824
axo12108-f_at	1.05e-05	1.25e-06	-12.8293	5.40892	-0.736799	ST6GALNAC2	sialyltransferase 7	0.600069
axo15794-r_at	0.00184	0.000652	-5.3818	-1.50656	-0.736672	MPP6	membrane protein, palmitoylated 6	0.600122
axo07382-f_at	4.53e-05	7.93e-06	-10.058	3.35922	-0.735923	CXCL10	small inducible cytokine B10 precursor	0.600434
axo08877-f_at	5.22e-05	9.44e-06	-9.82621	3.16586	-0.735381	SRPR	signal recognition particle receptor	0.600659
axo18074-f_at	1.76e-05	2.42e-06	-11.7661	4.67465	-0.735302	RHOU	ras homolog gene family, member U	0.600692
axo16085-f_at	0.000289	7.42e-05	-7.40895	0.883924	-0.7353	ZCCHC8	zinc finger, CCHC domain containing 8	0.600693
axo09709-f_at	2.57e-05	3.92e-06	-11.0427	4.13978	-0.734976	DMD	dystrophin Dp427m isoform	0.600828
axo12121-f_at	0.000634	0.000189	-6.48335	-0.144449	-0.734881	IVNS1ABP	influenza virus NS1A binding protein	0.600867
axo19037-f_at	0.000153	3.5e-05	-8.22575	1.71448	-0.73485	TMEM180	transmembrane protein 180	0.600881
axo15887-f_at	2.62e-05	4.01e-06	-11.011	4.11561	-0.734571	GCNT4	core 2 beta-1,6-N-acetylglucosaminyltransferase 3	0.600997
axo00523-f_at	0.00083	0.000259	-6.18951	-0.492316	-0.733094	WHSC1	Wolf-Hirschhorn syndrome candidate 1 protein isoform 1	0.601612
axo04952-f_at	8.31e-05	1.67e-05	-9.09787	2.53177	-0.732928	GPR116	G-protein coupled receptor 116	0.601681
axo20140-r_at	1.26e-05	1.58e-06	-12.4425	5.14851	-0.732683	CIRH1A	cirhin	0.601784
axo09873-f_at	4.52e-05	7.91e-06	-10.0614	3.36206	-0.732473	KLF4	Kruppel-like factor 4 (gut)	0.601871
axo13231-r_at	1.7e-05	2.32e-06	-11.8328	4.72249	-0.732417	TIMM10	translocase of inner mitochondrial membrane 10 homolog	0.601895
axo19187-f_at	1.98e-05	2.82e-06	-11.5338	4.50623	-0.732227	ZNF703	zinc finger protein 703	0.601974
axo11979-r_at	2.39e-05	3.58e-06	-11.1746	4.2396	-0.731873	EMG1	C2f protein	0.602121
axo14190-f_at	8.68e-05	1.76e-05	-9.0331	2.47334	-0.731641	NCAPD2	non-SMC condensin I complex, subunit D2	0.602219
axo06036-f_at	1.43e-05	1.87e-06	-12.1698	4.96036	-0.730688	IPO11	Ran binding protein 11 isoform 1	0.602616
axo03989-f_at	1.39e-05	1.79e-06	-12.2379	5.00773	-0.730208		PREDICTED: similar to OTTHUMP00000045488, partial	0.602817
axo17688-f_at	4.93e-06	4.65e-07	-14.5755	6.50016	-0.729946	XPO5	exportin 5	0.602927
axo15501-r_at	2.29e-05	3.4e-06	-11.2512	4.29713	-0.729882	FAM18B	hypothetical protein LOC51030	0.602953
axo13762-f_at	0.000369	9.92e-05	-7.11016	0.562667	-0.728544	TJP3	tight junction protein 3	0.603513
axo09581-f_at	0.000565	0.000164	-6.61781	0.011175	-0.728309	HDAC3	histone deacetylase 3	0.603611
axo13615-r_at	0.000223	5.46e-05	-7.73503	1.22361	-0.728225	PLK4	polo-like kinase 4	0.603646
axo10079-f_at	5.02e-05	8.96e-06	-9.89447	3.22322	-0.727201	EPHB3	ephrin receptor EphB3 precursor	0.604075
axo10418-f_at	4.05e-05	6.86e-06	-10.2541	3.51986	-0.727083	CRLF1	cytokine receptor-like factor 1	0.604124
axo11113-f_at	0.000105	2.21e-05	-8.75855	2.22173	-0.726877	CHAF1A	chromatin assembly factor 1, subunit A (p150)	0.60421
axo02083-f_at	2.8e-05	4.34e-06	-10.8961	4.02757	-0.725746	CYP4F22	cytochrome P450, family 4, subfamily F, polypeptide 22	0.604684
axo15285-f_at	1.48e-05	1.96e-06	-12.0979	4.91012	-0.72563	ADAR	adenosine deaminase, RNA-specific isoform c	0.604733
axo11901-f_at	0.000342	9.06e-05	-7.20318	0.663735	-0.725614	RRAS	related RAS viral (r-ras) oncogene homolog	0.60474
axo10717-f_at	7.63e-05	1.5e-05	-9.23076	2.65059	-0.725366	PSMD5	proteasome 26S non-ATPase subunit 5	0.604843
axo03758-f_at	1.01e-05	1.18e-06	-12.9247	5.47206	-0.724429		PREDICTED: similar to hCG22561	0.605237
axo12573-f_at	0.00301	0.00114	-4.92676	-2.11734	-0.724313	SPTBN2	spectrin, beta, non-erythrocytic 2	0.605285
axo10406-f_at	0.000134	2.98e-05	-8.40789	1.89079	-0.723635	MTA2	metastasis-associated protein 2	0.60557
axo21474-f_at	0.000395	0.000108	-7.02639	0.470808	-0.723082	RAB7B	RAB7B, member RAS oncogene family	0.605802
axo10980-f_at	1.77e-05	2.43e-06	-11.7608	4.6709	-0.723036	HBZ	hemoglobin, zeta	0.605821
axo14878-f_at	1.46e-05	1.92e-06	-12.1306	4.93303	-0.72206	IFRD1	interferon-related developmental regulator 1	0.606231
axo09596-f_at	0.00611	0.00255	-4.31338	-2.98667	-0.721872	FCGBP	Fc fragment of IgG binding protein	0.60631
axo05244-f_at	0.000556	0.000161	-6.63515	0.031077	-0.721813	C1orf26	hypothetical protein LOC54823	0.606335
axo13756-f_at	0.00088	0.000276	-6.12903	-0.565272	-0.721408	NFKBIZ	nuclear factor of kappa light polypeptide gene enhancer in B-cells inhibitor, zeta isoform b	0.606505
axo07989-f_at	0.000246	6.15e-05	-7.60712	1.09169	-0.721213	ITGAV	integrin alpha-V isoform 1 precursor	0.606587
axo09309-f_at	5.74e-06	5.71e-07	-14.1942	6.27278	-0.720303	HMGCR	3-hydroxy-3-methylglutaryl-Coenzyme A reductase isoform 1	0.60697
axo10913-f_at	7.21e-06	7.72e-07	-13.6526	5.93975	-0.719879	EWSR1	Ewing sarcoma breakpoint region 1 isoform EWS	0.607148
axo18823-f_at	1.1e-05	1.33e-06	-12.7229	5.33801	-0.718661	MPZL1	myelin protein zero-like 1 isoform b	0.607661
axo17302-f_at	0.000684	0.000206	-6.40099	-0.240854	-0.718534	PARD3	partitioning-defective protein 3 homolog	0.607714
axo12442-f_at	0.00327	0.00126	-4.85244	-2.21986	-0.718379	CBX1	heterochromatin protein 1-beta	0.60778
axo17454-f_at	9.96e-05	2.08e-05	-8.83521	2.29263	-0.717831	CABC1	chaperone, ABC1 activity of bc1 complex like precursor	0.608011
axo17861-f_at	2.01e-05	2.88e-06	-11.4994	4.48101	-0.717509	PHRF1	PHD and ring finger domains 1	0.608147
axo13362-f_at	0.000264	6.64e-05	-7.52585	1.00699	-0.717075	GMPPA	GDP-mannose pyrophosphorylase A	0.608329
axo10731-r_s_at	2.25e-05	3.33e-06	-11.2846	4.32209	-0.716202	SFPQ	splicing factor proline/glutamine rich (polypyrimidine tract binding protein associated)	0.608698
axo08393-r_at	6.06e-06	6.11e-07	-14.0707	6.19796	-0.715829	SERPINB5	serine (or cysteine) proteinase inhibitor, clade B (ovalbumin), member 5	0.608855
axo19523-f_at	0.000469	0.000131	-6.83017	0.252516	-0.71499	RBCK1	RanBP-type and C3HC4-type zinc finger containing 1 isoform 2	0.609209
axo02497-f_at	5.85e-06	5.85e-07	-14.1499	6.24603	-0.71461	NOP2	nucleolar protein 1, 120kDa	0.60937
axo02152-f_at	6.57e-05	1.25e-05	-9.46205	2.85399	-0.714149	NOMO2	nodal modulator 2 isoform 2	0.609565
axo20317-r_at	3.62e-05	5.99e-06	-10.4412	3.67064	-0.713964	BAT4	HLA-B associated transcript 4	0.609643
axo01865-r_at	0.000631	0.000187	-6.49055	-0.136051	-0.713538	PANK2	pantothenate kinase 2 isoform 2	0.609823
axo11627-f_at	0.000257	6.44e-05	-7.55691	1.03944	-0.713301	ALKBH1	alkylated DNA repair protein alkB homolog	0.609923
axo12315-r_at	9.55e-05	1.97e-05	-8.89589	2.3484	-0.713201	USP19	ubiquitin specific peptidase 19	0.609965
axo03418-f_at	5.03e-06	4.77e-07	-14.5262	6.47108	-0.712909	ENTPD2	ectonucleoside triphosphate diphosphohydrolase 2 isoform 1	0.610089
axo09827-f_at	2.38e-05	3.56e-06	-11.1817	4.24494	-0.71276	TANK	TRAF interacting protein TANK isoform a	0.610152
axo18496-f_at	3.25e-05	5.25e-06	-10.6252	3.81662	-0.712685	MFSD1	major facilitator superfamily domain containing 1	0.610183
axo01930-f_at	8.32e-06	9.23e-07	-13.3395	5.74149	-0.71202	ZNF398	zinc finger 398 isoform a	0.610465
axo11317-r_at	3.04e-05	4.82e-06	-10.7454	3.91079	-0.711867	TSPAN3	transmembrane 4 superfamily member 8 isoform 1	0.610529
axo01730-f_at	7.02e-06	7.44e-07	-13.7165	5.97969	-0.711867	RBM45	RNA binding motif protein 45	0.610529
axo04941-r_at	1.09e-05	1.3e-06	-12.7545	5.35916	-0.711468	CHCHD4	coiled-coil-helix-coiled-coil-helix domain containing 4 isoform 1	0.610698
axo10643-f_at	1.2e-05	1.47e-06	-12.5548	5.22488	-0.71146	LIMS1	LIM and senescent cell antigen-like domains 1	0.610702
axo07574-f_at	0.000867	0.000272	-6.14361	-0.547638	-0.711412	CBR1	carbonyl reductase 1	0.610722
axo07522-f_at	0.000105	2.21e-05	-8.76101	2.22401	-0.711391	BCL7B	B-cell CLL/lymphoma 7B	0.610731
axo01207-f_at	6.75e-05	1.29e-05	-9.42225	2.81929	-0.711059	SFRS7	splicing factor, arginine/serine-rich 7	0.610872
axo07610-f_at	5.4e-06	5.26e-07	-14.3458	6.36389	-0.710601	CENPA	centromere protein A isoform a	0.611066
axo08701-f_at	7.93e-06	8.72e-07	-13.4375	5.80401	-0.710047	RPA1	replication protein A1, 70kDa	0.6113
axo09526-f_at	7.9e-05	1.57e-05	-9.1785	2.60404	-0.709949	CDS2	phosphatidate cytidylyltransferase 2	0.611342
axo18743-f_at	1.92e-05	2.71e-06	-11.5943	4.55037	-0.709819	MFSD11	major facilitator superfamily domain containing 11	0.611397
axo19295-f_at	8.35e-05	1.68e-05	-9.09052	2.52516	-0.70924	GRPEL1	GrpE-like 1, mitochondrial	0.611642
axo17420-f_at	3.96e-05	6.69e-06	-10.2883	3.54758	-0.709031	CTBP1	C-terminal binding protein 1 isoform 2	0.611731
axo13043-f_at	5.7e-05	1.05e-05	-9.68791	3.0486	-0.708811	SLC35A3	solute carrier family 35 member 3A	0.611824
axo16549-f_at	0.000598	0.000176	-6.55012	-0.066897	-0.708635	RBM28	RNA binding motif protein 28	0.611899
axo03779-f_at	0.000119	2.56e-05	-8.58806	2.0622	-0.708631	hCG_1773238	PREDICTED: similar to hCG1773238	0.611901
axo16931-r_at	6.35e-06	6.55e-07	-13.9463	6.12188	-0.708624	NUSAP1	nucleolar and spindle associated protein 1 isoform 2	0.611903
axo12556-r_s_at	3.84e-05	6.44e-06	-10.3409	3.59015	-0.708591	SFRS1	splicing factor, arginine/serine-rich 1 isoform 1	0.611917
axo09479-r_at	0.00023	5.66e-05	-7.69496	1.18246	-0.707444	STX11	syntaxin 11	0.612404
axo16923-f_at	2.82e-05	4.38e-06	-10.881	4.01594	-0.707186	UBAP2	ubiquitin associated protein 2	0.612514
axo19506-f_at	0.000141	3.17e-05	-8.33815	1.82365	-0.706616	HNRNPA1	heterogeneous nuclear ribonucleoprotein A1 isoform b	0.612756
axo16240-f_at	0.000272	6.88e-05	-7.48785	0.967145	-0.706326	NCAPG2	leucine zipper protein 5	0.612879
axo11153-f_at	3.74e-05	6.23e-06	-10.3868	3.62703	-0.706237	HES1	hairy and enhancer of split 1	0.612917
axo10253-f_at	9.18e-05	1.88e-05	-8.95282	2.40043	-0.705627	SFRS8	splicing factor, arginine/serine-rich 8	0.613176
axo09049-f_at	0.000327	8.59e-05	-7.2578	0.722638	-0.705439	TTK	TTK protein kinase	0.613256
axo12938-f_at	8.11e-05	1.62e-05	-9.13745	2.56731	-0.704962	ABCB10	ATP-binding cassette, sub-family B, member 10	0.613459
axo18590-r_at	4.07e-05	6.9e-06	-10.2451	3.51257	-0.704288	C12orf43	hypothetical protein LOC64897	0.613745
axo13894-f_at	0.000122	2.65e-05	-8.54452	2.02105	-0.703964	CYFIP1	cytoplasmic FMR1 interacting protein 1 isoform a	0.613883
axo01935-f_at	4.09e-05	6.96e-06	-10.2339	3.50341	-0.703336	TGIF1	TG-interacting factor isoform a	0.61415
axo02311-r_at	0.000107	2.26e-05	-8.73122	2.19632	-0.703141	HIST3H2BB	histone cluster 3, H2bb	0.614233
axo06663-f_at	3.27e-05	5.28e-06	-10.6168	3.80998	-0.702491	FGFR2	fibroblast growth factor receptor 2 isoform 8 precursor	0.61451
axo20785-f_at	6.74e-05	1.29e-05	-9.42428	2.82107	-0.702313	TRA2B	splicing factor, arginine/serine-rich 10	0.614586
axo07605-f_at	0.00136	0.000456	-5.685	-1.11557	-0.702204	CDO1	cysteine dioxygenase	0.614633
axo13548-r_at	5.84e-05	1.08e-05	-9.65256	3.0184	-0.702144	TMEM208	HSPC171 protein	0.614658
axo05007-r_at	0.00101	0.000325	-5.98251	-0.743984	-0.701858	2018-09-08	septin 8 isoform a	0.61478
axo20776-f_s_at	8.29e-06	9.19e-07	-13.3466	5.74604	-0.70182	HNRNPAB	heterogeneous nuclear ribonucleoprotein A/B isoform b	0.614796
axo02911-f_at	0.00021	5.08e-05	-7.81183	1.302	-0.701481	SASS6	spindle assembly abnormal protein 6	0.61494
axo11743-f_at	1.42e-05	1.84e-06	-12.1917	4.97561	-0.701293	TMEM50B	transmembrane protein 50B	0.615021
axo01710-f_at	0.000353	9.44e-05	-7.16095	0.617971	-0.701173	COL24A1	collagen, type XXIV, alpha 1	0.615072
axo12434-f_at	3.09e-05	4.91e-06	-10.7178	3.8893	-0.70098	KDELR1	KDEL (Lys-Asp-Glu-Leu) endoplasmic reticulum protein retention receptor 1	0.615154
axo12793-f_at	8.44e-06	9.41e-07	-13.3055	5.71972	-0.7003	RNF139	ring finger protein 139	0.615444
axo02243-f_at	2.96e-05	4.66e-06	-10.7943	3.94883	-0.70023	C3orf38	hypothetical protein LOC285237	0.615474
axo19698-f_at	7.3e-05	1.42e-05	-9.29978	2.71173	-0.700175	EIF2A	eukaryotic translation initiation factor 2A	0.615497
axo05454-f_at	3.16e-05	5.04e-06	-10.6825	3.86163	-0.69989	DBNL	drebrin-like isoform c	0.615619
axo17194-f_at	0.00422	0.00168	-4.62841	-2.53363	-0.699761	ANO9	tumor protein p53 inducible protein 5	0.615674
axo09114-r_at	2.93e-05	4.6e-06	-10.8133	3.96357	-0.698046	VRK1	vaccinia related kinase 1	0.616406
axo08151-f_at	0.0178	0.00859	-3.4543	-4.28675	-0.697819	MAX	MAX protein isoform a	0.616504
axo19380-f_at	3.27e-05	5.28e-06	-10.6151	3.80867	-0.697811	MAP2K2	mitogen-activated protein kinase kinase 2	0.616507
axo02177-f_at	0.000702	0.000213	-6.37024	-0.277075	-0.697241	C9orf75	hypothetical protein LOC286262 isoform 2	0.61675
axo01137-r_at	9.05e-05	1.85e-05	-8.97272	2.41855	-0.696932	ZDHHC15	zinc finger, DHHC-type containing 15 isoform 1	0.616883
axo17504-f_at	3.19e-05	5.13e-06	-10.6556	3.84055	-0.6967	COL8A1	alpha 1 type VIII collagen precursor	0.616982
axo04408-f_at	7.89e-06	8.66e-07	-13.451	5.81257	-0.696586	SMAP1	stromal membrane-associated GTPase-activating protein 1 isoform A	0.617031
axo15321-f_at	1.55e-05	2.08e-06	-12.0042	4.84422	-0.695511	UMOD	uromodulin precursor	0.617491
axo19466-f_at	0.00121	0.000401	-5.79724	-0.973997	-0.695361	ACSBG2	bubblegum related protein	0.617555
axo15497-r_at	3.22e-05	5.19e-06	-10.6401	3.82835	-0.694769	VPS36	vacuolar protein sorting 36	0.617808
axo20529-f_at	7.45e-06	8.04e-07	-13.5796	5.89393	-0.6946	ESRRG	estrogen-related receptor gamma isoform 2	0.61788
axo11230-r_at	2.45e-05	3.69e-06	-11.1315	4.20711	-0.694416	REST	RE1-silencing transcription factor	0.61796
axo16308-f_at	0.000158	3.64e-05	-8.18239	1.67205	-0.694231	FUCA1	fucosidase, alpha-L-1, tissue	0.618039
axo18848-f_at	0.00634	0.00266	-4.2827	-3.03152	-0.694079	CHMP6	chromatin modifying protein 6	0.618104
axo07791-f_at	1.44e-05	1.88e-06	-12.1577	4.95192	-0.693625	F13B	coagulation factor XIII B subunit precursor	0.618298
axo11199-f_at	0.00184	0.00065	-5.38544	-1.5018	-0.693447	CPT2	carnitine O-palmitoyltransferase precursor	0.618375
axo09652-r_at	7.54e-06	8.17e-07	-13.5517	5.87636	-0.69304	ERCC8	excision repair cross-complementing rodent repair deficiency, complementation group 8 isoform 1	0.618549
axo16951-r_at	8.89e-06	1.01e-06	-13.1921	5.64665	-0.692779	TMEM165	transmembrane protein 165	0.618661
axo07608-f_at	0.000872	0.000274	-6.13805	-0.554359	-0.692738	CDR2	cerebellar degeneration-related protein 2	0.618679
axo18694-f_at	0.000303	7.86e-05	-7.34898	0.820226	-0.692724	DDX54	DEAD (Asp-Glu-Ala-Asp) box polypeptide 54 isoform 2	0.618685
axo07334-f_s_at	3.36e-05	5.48e-06	-10.5652	3.76931	-0.692547	GSTA4	glutathione S-transferase alpha 4	0.61876
axo12544-f_at	0.00247	0.000912	-5.10701	-1.87192	-0.691484	MYO9A	myosin IXA	0.619217
axo08395-r_at	0.000222	5.42e-05	-7.74241	1.23116	-0.690928	PIGA	phosphatidylinositol N-acetylglucosaminyltransferase subunit A isoform 1	0.619455
axo11591-f_at	0.000107	2.27e-05	-8.73025	2.19542	-0.690273	SKP2	S-phase kinase-associated protein 2 isoform 1	0.619737
axo08443-f_at	0.0368	0.0196	-2.90599	-5.1526	-0.68998	PPL	periplakin	0.619862
axo03985-r_at	9.54e-06	1.1e-06	-13.0391	5.54711	-0.689798	YIF1B	Yip1 interacting factor homolog B isoform 4	0.619941
axo15320-f_at	3.09e-05	4.92e-06	-10.7171	3.88871	-0.689238	UMOD	uromodulin precursor	0.620181
axo12112-f_at	0.000288	7.4e-05	-7.41189	0.88704	-0.688614	HEXIM1	hexamethylene bis-acetamide inducible 1	0.62045
axo18867-f_at	2.6e-05	3.97e-06	-11.0245	4.12589	-0.687734	SFRS14	splicing factor, arginine/serine-rich 14	0.620828
axo07966-f_at	0.000211	5.1e-05	-7.80793	1.29803	-0.687695	ID3	inhibitor of DNA binding 3	0.620845
axo01050-f_at	0.000147	3.33e-05	-8.28323	1.77046	-0.687669	FAM76B	hypothetical protein LOC143684	0.620856
axo14253-f_at	4.96e-05	8.81e-06	-9.91742	3.24243	-0.687051	CHSY1	carbohydrate (chondroitin) synthase 1	0.621122
axo21324-f_at	0.000538	0.000155	-6.67176	0.072997	-0.686592	NUDT22	nudix (nucleoside diphosphate linked moiety X)-type motif 22 isoform a	0.62132
axo05520-f_at	0.000499	0.000142	-6.75656	0.169462	-0.686448	CSK	c-src tyrosine kinase	0.621382
axo09578-f_at	3.71e-05	6.16e-06	-10.4024	3.63955	-0.6863	GGH	gamma-glutamyl hydrolase precursor	0.621446
axo04102-f_at	8.09e-06	8.94e-07	-13.3956	5.77734	-0.685942		PREDICTED: hypothetical protein	0.6216
axo13549-f_at	2.68e-05	4.13e-06	-10.9658	4.08107	-0.685889	SSU72	Ssu72 RNA polymerase II CTD phosphatase homolog	0.621623
axo00636-f_at	5.2e-05	9.38e-06	-9.83483	3.17313	-0.685805	TANK	TRAF interacting protein TANK isoform b	0.621659
axo13351-f_at	0.000156	3.56e-05	-8.20569	1.69487	-0.685767	SNX8	sorting nexin 8	0.621675
axo06772-f_at	0.000169	3.93e-05	-8.09478	1.58577	-0.685669	PTPN3	protein tyrosine phosphatase, non-receptor type 3 isoform 2	0.621717
axo09419-f_at	4.81e-05	8.5e-06	-9.96448	3.2817	-0.685387	CDC2L5	cell division cycle 2-like 5 isoform 1	0.621839
axo04462-r_at	4.1e-05	6.99e-06	-10.2285	3.49907	-0.6852	TYMS	thymidylate synthetase	0.621919
axo08187-f_at	0.000194	4.63e-05	-7.91451	1.40589	-0.684979	MMP19	matrix metalloproteinase 19 isoform rasi-1 preproprotein	0.622015
axo02761-r_at	9.22e-06	1.05e-06	-13.1124	5.59497	-0.684426	PCNA	proliferating cell nuclear antigen	0.622253
axo17562-r_at	1.65e-05	2.24e-06	-11.8851	4.75981	-0.683937	DOLPP1	dolichyl pyrophosphate phosphatase 1 isoform a	0.622464
axo18615-f_at	0.000755	0.000231	-6.29156	-0.370268	-0.683794	CFH	complement factor H isoform b precursor	0.622526
axo10297-f_at	6.5e-06	6.75e-07	-13.8919	6.08845	-0.683773	BAT1	HLA-B associated transcript 1	0.622535
axo00481-f_at	0.00647	0.00272	-4.26502	-3.05742	-0.683093	MOBKL2A	MOB-LAK	0.622829
axo06473-f_at	5e-05	8.92e-06	-9.90122	3.22887	-0.682082	SPHK1	sphingosine kinase 1 isoform 3	0.623265
axo13423-f_at	0.000127	2.8e-05	-8.48326	1.96286	-0.681861	NRG1	neuregulin 1 isoform HRG-beta2	0.623361
axo14097-f_at	0.00145	0.000495	-5.61594	-1.20351	-0.681694	TSC22D2	TSC22 domain family, member 2	0.623433
axo19887-f_at	3.54e-05	5.82e-06	-10.4798	3.70144	-0.681486	FBLIM1	filamin-binding LIM protein-1 isoform b	0.623523
axo10147-f_at	0.0147	0.00693	-3.6007	-4.05929	-0.681338	PRLR	prolactin receptor	0.623587
axo00914-f_at	0.000433	0.00012	-6.9232	0.35657	-0.681265	TPCN2	two pore segment channel 2	0.623618
axo03052-r_at	1.95e-05	2.76e-06	-11.5657	4.52951	-0.681205	APOOL	apolipoprotein O-like	0.623644
axo06393-f_at	0.000225	5.54e-05	-7.71915	1.20731	-0.680976	SMC6	SMC6 protein	0.623743
axo18627-f_at	0.000225	5.53e-05	-7.71992	1.2081	-0.680832	WHSC1L1	WHSC1L1 protein isoform long	0.623805
axo15953-f_at	0.00132	0.000443	-5.71071	-1.08299	-0.680445	HOXC13	homeobox C13	0.623973
axo16986-r_at	1.7e-05	2.32e-06	-11.8297	4.72029	-0.679375	ETNK1	ethanolamine kinase 1 isoform A	0.624436
axo15367-f_at	1.06e-05	1.26e-06	-12.8087	5.39524	-0.678685	PIGT	phosphatidylinositol glycan anchor biosynthesis, class T precursor	0.624734
axo12460-f_at	8.02e-05	1.6e-05	-9.15354	2.58172	-0.678392	ACOT2	peroxisomal long-chain acyl-coA thioesterase	0.624861
axo17277-f_at	0.0752	0.0446	-2.37721	-5.99069	-0.678357	ITSN2	intersectin 2 isoform 3	0.624877
axo01107-f_at	7.6e-05	1.5e-05	-9.23638	2.65558	-0.678356	THAP6	THAP domain containing 6	0.624877
axo13117-f_at	7.84e-05	1.55e-05	-9.18864	2.61308	-0.678326	KIF4A	kinesin family member 4	0.62489
axo00535-f_at	6.44e-05	1.22e-05	-9.49686	2.88424	-0.678045	VRK3	vaccinia related kinase 3 isoform 2	0.625012
axo11783-f_at	3.15e-05	5.02e-06	-10.6879	3.86586	-0.677942	NNMT	nicotinamide N-methyltransferase	0.625056
axo01743-f_at	0.000108	2.29e-05	-8.71832	2.18431	-0.677272	APCDD1	adenomatosis polyposis coli down-regulated 1	0.625347
axo02567-r_at	0.0208	0.0103	-3.33381	-4.47539	-0.676725	IL22RA2	interleukin 22-binding protein isoform 2	0.625584
axo09197-r_at	1.12e-05	1.36e-06	-12.6811	5.31001	-0.676415	TAF15	TBP-associated factor 15 isoform 2	0.625718
axo12861-r_at	1.87e-05	2.61e-06	-11.6468	4.58857	-0.676076	STAT1	signal transducer and activator of transcription 1 isoform alpha	0.625865
axo19640-f_at	0.000394	0.000107	-7.03037	0.475197	-0.676059	GORASP1	Golgi reassembly stacking protein 1	0.625873
axo06421-f_at	1.05e-05	1.24e-06	-12.8347	5.41249	-0.675662	SLC10A3	solute carrier family 10, member 3 isoform 1	0.626045
axo01741-r_at	0.000816	0.000254	-6.20737	-0.470861	-0.67562	EZH2	enhancer of zeste 2 isoform b	0.626063
axo09875-f_at	1.8e-05	2.48e-06	-11.7275	4.64691	-0.675593	TRIP13	thyroid hormone receptor interactor 13	0.626075
axo19269-f_at	1.8e-05	2.48e-06	-11.728	4.64722	-0.675247	TMEM30B	transmembrane protein 30B	0.626225
axo05386-f_at	4.19e-05	7.19e-06	-10.189	3.46688	-0.675237	CHEK1	checkpoint kinase 1	0.626229
axo15875-f_at	0.00132	0.000442	-5.71214	-1.08117	-0.674432	TLR7	toll-like receptor 7	0.626579
axo13113-f_at	7.98e-05	1.59e-05	-9.16264	2.58986	-0.674172	SHANK2	SH3 and multiple ankyrin repeat domains 2 isoform 1	0.626692
axo04592-f_at	5.22e-05	9.42e-06	-9.82855	3.16783	-0.673902	ETV4	ets variant gene 4 (E1A enhancer binding protein, E1AF)	0.626809
axo18745-f_at	6.46e-05	1.22e-05	-9.48992	2.87822	-0.673774	NOL12	nucleolar protein 12	0.626865
axo16405-r_at	1.16e-05	1.42e-06	-12.6181	5.26764	-0.673449	PRPF39	PRP39 pre-mRNA processing factor 39 homolog	0.627006
axo06197-r_at	0.000619	0.000183	-6.51103	-0.112224	-0.673301	NOTCH3	Notch homolog 3	0.62707
axo00998-f_at	0.000494	0.00014	-6.76914	0.183708	-0.672869	COMTD1	catechol-O-methyltransferase domain containing 1	0.627258
axo12713-f_at	0.000172	4.01e-05	-8.07214	1.56335	-0.6727	ZNF41	zinc finger protein 41	0.627331
axo11610-f_s_at	5.75e-05	1.06e-05	-9.67339	3.03621	-0.672636	TUBA1A	tubulin, alpha 1a	0.62736
axo14219-f_at	1.06e-05	1.26e-06	-12.8055	5.39308	-0.672184	PITRM1	metalloprotease 1	0.627556
axo00300-f_at	7.83e-06	8.56e-07	-13.4711	5.82533	-0.671568	FAM3B	family with sequence similarity 3, member B isoform a	0.627824
axo10309-f_at	2.52e-05	3.83e-06	-11.0776	4.16631	-0.670253	BAP1	BRCA1 associated protein-1	0.628396
axo16723-f_at	0.000242	6.04e-05	-7.62653	1.11181	-0.670192	NUP133	nucleoporin 133kDa	0.628423
axo17162-f_at	1.06e-05	1.25e-06	-12.822	5.40408	-0.669935	SMCR7L	hypothetical protein LOC54471	0.628535
axo09733-f_at	1.04e-05	1.23e-06	-12.8578	5.42782	-0.669638	BYSL	bystin	0.628665
axo04942-f_at	0.000226	5.56e-05	-7.71449	1.20253	-0.669352	PPT1	palmitoyl-protein thioesterase 1 isoform 1 precursor	0.628789
axo03594-r_at	2.04e-05	2.94e-06	-11.4701	4.45948	-0.669224	PRKCD	protein kinase C, delta	0.628845
axo13649-f_at	7.93e-06	8.73e-07	-13.4357	5.80286	-0.669223	PES1	pescadillo homolog 1, containing BRCT domain	0.628845
axo13655-f_at	3.01e-05	4.77e-06	-10.7604	3.9225	-0.668963	PDSS1	prenyl diphosphate synthase, subunit 1	0.628959
axo00233-f_at	0.000128	2.84e-05	-8.46696	1.94731	-0.668321	MYLK	myosin light chain kinase isoform 8	0.629239
axo18935-f_at	9.77e-05	2.03e-05	-8.86138	2.31672	-0.668097	CCDC51	coiled-coil domain containing 51	0.629336
axo19052-f_at	1.4e-05	1.81e-06	-12.2221	4.99676	-0.668017	UBA5	ubiquitin-activating enzyme 5 isoform 1	0.629371
axo04844-f_at	0.00153	0.000523	-5.56783	-1.26517	-0.667703	PKP1	plakophilin 1 isoform 1b	0.629508
axo07917-r_at	2.96e-05	4.65e-06	-10.7952	3.94953	-0.667516	HARS	histidyl-tRNA synthetase	0.62959
axo08706-f_at	3.47e-05	5.68e-06	-10.5132	3.72801	-0.66739	MRPL12	mitochondrial ribosomal protein L12	0.629645
axo04752-r_at	2.66e-05	4.07e-06	-10.9867	4.09709	-0.667159	UNC119B	unc-119 homolog B	0.629746
axo19547-f_at	0.000224	5.5e-05	-7.72641	1.21476	-0.667025	CDCA3	cell division cycle associated 3	0.629804
axo01878-f_at	0.000259	6.51e-05	-7.54538	1.0274	-0.666925	ZNF367	zinc finger protein 367	0.629848
axo10761-f_at	0.000277	7.06e-05	-7.46017	0.938024	-0.666397	PGLYRP1	peptidoglycan recognition protein 1	0.630078
axo12095-r_at	0.000516	0.000147	-6.71984	0.127797	-0.665633	SMC2	structural maintenance of chromosomes 2	0.630412
axo13731-f_at	5.43e-05	9.9e-06	-9.76317	3.11259	-0.665631	DNAJC2	DnaJ (Hsp40) homolog, subfamily C, member 2 isoform 1	0.630413
axo12640-f_at	7.63e-05	1.5e-05	-9.22997	2.64988	-0.665512	DUSP14	dual specificity phosphatase 14	0.630465
axo13409-f_at	2.08e-05	3.01e-06	-11.433	4.43213	-0.6655	MKRN1	makorin ring finger protein 1 isoform 1	0.63047
axo11685-f_at	4.19e-05	7.19e-06	-10.1897	3.46743	-0.665385	CITED2	Cbp/p300-interacting transactivator, with Glu/Asp-rich carboxy-terminal domain, 2	0.63052
axo06161-f_at	7.17e-05	1.39e-05	-9.33034	2.73868	-0.665214	ZDHHC3	zinc finger, DHHC-type containing 3 isoform 3	0.630595
axo09493-f_at	0.000577	0.000168	-6.59174	-0.01883	-0.665044	KLKB1	plasma kallikrein B1 precursor	0.630669
axo14824-r_at	6.51e-05	1.24e-05	-9.47793	2.8678	-0.664716	NCAPD3	non-SMC condensin II complex, subunit D3	0.630813
axo06209-f_at	3.7e-05	6.15e-06	-10.4041	3.64091	-0.664698	DCTN4	dynactin 4 (p62) isoform a	0.630821
axo15676-f_at	0.000137	3.07e-05	-8.37547	1.85964	-0.664389	TAF9	TAF9 RNA polymerase II, TATA box binding protein-associated factor isoform b	0.630956
axo05024-r_at	0.000366	9.83e-05	-7.12024	0.573664	-0.66362	FAM54A	DUF729 domain containing 1	0.631292
axo17291-f_at	1.89e-05	2.66e-06	-11.6202	4.56921	-0.663533	IRGC	immunity-related GTPase family, cinema	0.63133
axo15316-r_at	8.41e-06	9.36e-07	-13.3155	5.72614	-0.66271	UMOD	uromodulin precursor	0.63169
axo07974-f_at	0.0011	0.00036	-5.89339	-0.854058	-0.662574	INHBB	inhibin beta B subunit preproprotein	0.63175
axo08442-f_at	2.74e-05	4.24e-06	-10.9285	4.05249	-0.662397	PPL	periplakin	0.631828
axo13023-r_at	3.31e-05	5.39e-06	-10.588	3.78732	-0.662358	HNRNPH3	heterogeneous nuclear ribonucleoprotein H3 isoform a	0.631845
axo11111-r_at	3.8e-05	6.36e-06	-10.3572	3.60322	-0.662029	CHAF1A	chromatin assembly factor 1, subunit A (p150)	0.631989
axo01422-f_at	0.000106	2.24e-05	-8.74181	2.20618	-0.661447	TADA2B	transcriptional adaptor 2 (ADA2 homolog, yeast)-beta	0.632244
axo07700-f_at	0.000204	4.93e-05	-7.84575	1.33644	-0.661394	CTGF	connective tissue growth factor	0.632267
axo13838-f_at	0.000101	2.1e-05	-8.81956	2.27819	-0.661257	CNOT3	CCR4-NOT transcription complex, subunit 3	0.632327
axo04193-r_at	3.7e-05	6.14e-06	-10.4066	3.64294	-0.660901	LGALS9C	galectin 9 like	0.632483
axo19243-r_at	1.33e-05	1.7e-06	-12.3231	5.06662	-0.660477	OPA3	OPA3 protein isoform b	0.632669
axo01959-r_at	3.3e-05	5.35e-06	-10.5985	3.79556	-0.660404	TRIM39	tripartite motif-containing 39 isoform 2	0.632701
axo13427-r_at	3.56e-05	5.86e-06	-10.471	3.69448	-0.660215	DHX38	DEAH (Asp-Glu-Ala-His) box polypeptide 38	0.632784
axo13292-f_at	0.0103	0.00462	-3.88317	-3.62679	-0.660026	TBK1	TANK-binding kinase 1	0.632867
axo12641-r_at	0.00024	5.97e-05	-7.63736	1.12303	-0.659	TOPBP1	topoisomerase (DNA) II binding protein 1	0.633317
axo08995-r_at	0.00168	0.000588	-5.4697	-1.39192	-0.658746	TLR3	toll-like receptor 3	0.633429
axo01123-f_at	0.000796	0.000246	-6.23384	-0.439132	-0.658726	SOCS5	suppressor of cytokine signaling 5	0.633437
axo03096-r_at	0.000102	2.14e-05	-8.79791	2.2582	-0.658026	GALNTL4	UDP-N-acetyl-alpha-D-galactosamine:polypeptide N-acetylgalactosaminyltransferase-like 4	0.633745
axo06127-r_at	1.91e-05	2.68e-06	-11.6067	4.55941	-0.6574	FIP1L1	FIP1 like 1 isoform 3	0.63402
axo14281-f_at	0.00027	6.82e-05	-7.49726	0.977022	-0.657081	ZHX2	zinc fingers and homeoboxes 2	0.63416
axo04945-r_at	0.000212	5.14e-05	-7.79844	1.28838	-0.656642	ZNF207	zinc finger protein 207 isoform c	0.634353
axo05777-f_at	0.000108	2.29e-05	-8.71598	2.18213	-0.656567	ATP6V0A1	ATPase, H+ transporting, lysosomal V0 subunit a1 isoform b	0.634386
axo09996-f_at	3.28e-05	5.31e-06	-10.609	3.80385	-0.65654	CEACAM5	carcinoembryonic antigen-related cell adhesion molecule 5 preproprotein	0.634398
axo16233-f_at	3.3e-05	5.34e-06	-10.5997	3.79652	-0.656227	ALKBH5	alkB, alkylation repair homolog 5	0.634536
axo04307-f_at	0.000181	4.26e-05	-8.00587	1.49745	-0.655964	CAST	calpastatin isoform g	0.634651
axo09681-f_at	0.000182	4.27e-05	-8.00196	1.49355	-0.655898	HIP1R	huntingtin interacting protein-1-related	0.63468
axo13186-r_at	0.00788	0.0034	-4.10213	-3.29802	-0.655836	ICMT	isoprenylcysteine carboxyl methyltransferase	0.634708
axo11927-f_at	4.08e-05	6.95e-06	-10.2357	3.50496	-0.655547	TNFAIP3	tumor necrosis factor, alpha-induced protein 3	0.634835
axo14160-f_at	0.00163	0.000565	-5.50333	-1.34832	-0.655403	ZBED4	zinc finger, BED-type containing 4	0.634898
axo14057-f_at	3.17e-05	5.08e-06	-10.6701	3.85192	-0.655157	TM9SF4	transmembrane 9 superfamily protein member 4	0.635006
axo16210-f_at	0.000367	9.88e-05	-7.11471	0.567626	-0.655075	EPS8L1	epidermal growth factor receptor pathway substrate 8-like protein 1 isoform b	0.635043
axo15852-f_at	7.94e-05	1.58e-05	-9.17018	2.5966	-0.654959	KLF3	Kruppel-like factor 3 (basic)	0.635094
axo19965-f_at	0.000161	3.72e-05	-8.15627	1.6464	-0.654756	STK19	serine/threonine kinase 19 isoform 2	0.635183
axo10152-r_at	1.5e-05	2e-06	-12.0664	4.88804	-0.654694	HUS1	HUS1 checkpoint protein	0.63521
axo04483-f_at	0.0447	0.0246	-2.76062	-5.38394	-0.654318	QSER1	glutamine and serine rich 1	0.635376
axo04281-r_at	8.82e-05	1.8e-05	-9.00966	2.4521	-0.654152	PC	pyruvate carboxylase precursor	0.635449
axo18603-f_at	0.000298	7.69e-05	-7.371	0.843665	-0.654008	ZNF638	zinc finger protein 638	0.635512
axo00887-r_at	0.000183	4.32e-05	-7.98999	1.48159	-0.653872	MAPK14	mitogen-activated protein kinase 14 isoform 3	0.635572
axo14900-r_at	2.06e-05	2.98e-06	-11.4499	4.44463	-0.653642	FEM1B	fem-1 homolog b	0.635674
axo01342-f_at	1.43e-05	1.86e-06	-12.179	4.96678	-0.653571	SGMS1	sphingomyelin synthase 1	0.635705
axo15330-f_at	0.000352	9.4e-05	-7.16544	0.622845	-0.653391	PIAS4	protein inhibitor of activated STAT, 4	0.635784
axo15746-r_at	1.86e-05	2.59e-06	-11.6602	4.59827	-0.653336	NAT8B	N-acetyltransferase 8B	0.635808
axo12271-f_at	2.31e-05	3.44e-06	-11.2353	4.28518	-0.653144	PHGDH	phosphoglycerate dehydrogenase	0.635893
axo13683-f_at	0.0337	0.0177	-2.9737	-5.04492	-0.652795	ZNF318	zinc finger protein 318	0.636047
axo03212-f_at	0.000936	0.000297	-6.06345	-0.644922	-0.652793	ARHGEF1	Rho guanine nucleotide exchange factor 1 isoform 1	0.636048
axo16284-f_at	1.6e-05	2.15e-06	-11.948	4.80449	-0.652743	UBE2R2	ubiquitin-conjugating enzyme UBC3B	0.63607
axo17680-r_at	4.07e-05	6.92e-06	-10.2414	3.50958	-0.65267	XPO5	exportin 5	0.636102
axo12050-r_at	2.25e-05	3.32e-06	-11.2881	4.32465	-0.652558	AGR2	anterior gradient 2 homolog	0.636152
axo00670-f_at	0.000492	0.000139	-6.77536	0.190731	-0.652209	DTX3L	deltex 3-like	0.636305
axo10341-f_at	3.86e-05	6.48e-06	-10.3309	3.58202	-0.651598	NMI	N-myc and STAT interactor	0.636575
axo05934-f_at	2.19e-05	3.21e-06	-11.3356	4.36007	-0.651587	PTPN12	protein tyrosine phosphatase, non-receptor type 12 isoform 3	0.63658
axo09834-r_at	2.31e-05	3.44e-06	-11.2356	4.28542	-0.651507	PLCB3	phospholipase C, beta 3 (phosphatidylinositol-specific)	0.636615
axo12458-f_at	4.98e-05	8.87e-06	-9.90817	3.23469	-0.650621	IFI44L	interferon-induced protein 44-like	0.637006
axo15768-f_at	7.93e-05	1.57e-05	-9.1732	2.5993	-0.650029	C15orf63	Huntingtin interacting protein K	0.637267
axo02775-f_at	2.19e-05	3.21e-06	-11.337	4.36108	-0.649885	CREM	cAMP responsive element modulator isoform h	0.637331
axo13122-r_at	0.000157	3.61e-05	-8.18997	1.67948	-0.64971	LETM1	leucine zipper-EF-hand containing transmembrane protein 1	0.637408
axo14388-f_at	1.35e-05	1.73e-06	-12.2958	5.04774	-0.64915		RNA binding motif protein 34	0.637656
axo15578-f_s_at	0.000343	9.08e-05	-7.20013	0.660438	-0.648826	A4GNT	alpha-1,4-N-acetylglucosaminyltransferase	0.637799
axo11450-r_at	0.000156	3.57e-05	-8.2047	1.69391	-0.648507	GALK2	galactokinase 2 isoform 2	0.63794
axo05968-f_at	0.000726	0.000221	-6.33265	-0.321499	-0.648094	NT5C2	5'-nucleotidase, cytosolic II	0.638123
axo10540-f_at	0.000384	0.000104	-7.06043	0.508236	-0.647664	MPDU1	mannose-P-dolichol utilization defect 1	0.638313
axo17833-f_at	3.44e-05	5.62e-06	-10.5278	3.73963	-0.646699	ARHGAP23	Rho GTPase activating protein 23	0.63874
axo11126-f_at	4.35e-05	7.53e-06	-10.1272	3.41622	-0.646676	SAE1	SUMO1 activating enzyme subunit 1 isoform a	0.63875
axo00941-f_at	0.00173	0.000607	-5.44257	-1.42719	-0.646613	FGD4	FYVE, RhoGEF and PH domain containing 4	0.638778
axo16786-f_at	2.01e-05	2.89e-06	-11.4964	4.47878	-0.646216	NGLY1	N-glycanase 1 isoform 1	0.638954
axo06539-r_at	0.000106	2.23e-05	-8.75148	2.21516	-0.646113	ZNF438	zinc finger protein 438 isoform b	0.638999
axo01669-f_at	0.00028	7.13e-05	-7.45087	0.928225	-0.645022	BEND7	BEN domain containing 7 isoform 1	0.639483
axo20671-r_at	2.68e-05	4.12e-06	-10.9706	4.08479	-0.644711	SFRS2	splicing factor, arginine/serine-rich 2	0.639621
axo04396-f_at	6.01e-05	1.12e-05	-9.60712	2.97944	-0.64433	STAG2	stromal antigen 2 isoform a	0.63979
axo10558-f_at	1.2e-05	1.48e-06	-12.5438	5.21743	-0.644314	SPAG7	sperm associated antigen 7	0.639797
axo12681-r_s_at	2.64e-05	4.04e-06	-10.9986	4.10617	-0.644258	ACP1	acid phosphatase 1, soluble isoform b	0.639822
axo14929-r_at	4.89e-05	8.68e-06	-9.93714	3.2589	-0.644207	NCAPH	non-SMC condensin I complex, subunit H	0.639844
axo13405-f_at	0.00157	0.000542	-5.53751	-1.30419	-0.643754	NCKAP1	NCK-associated protein 1 isoform 1	0.640046
axo09915-r_at	3.31e-05	5.38e-06	-10.5902	3.789	-0.64366	GOSR2	golgi SNAP receptor complex member 2 isoform A	0.640087
axo08445-f_at	0.0609	0.035	-2.53273	-5.7457	-0.643473	PPL	periplakin	0.64017
axo12199-f_s_at	4.71e-05	8.28e-06	-9.9999	3.31114	-0.642894	KHDRBS1	KH domain containing, RNA binding, signal transduction associated 1	0.640427
axo15758-r_at	4.22e-05	7.24e-06	-10.181	3.46029	-0.642162	ISYNA1	inositol-3-phosphate synthase 1	0.640752
axo05667-f_at	4.26e-05	7.35e-06	-10.1604	3.44348	-0.641857	VPS53	vacuolar protein sorting 53 isoform 1	0.640887
axo09752-r_at	1.23e-05	1.52e-06	-12.4994	5.1873	-0.640974	CTSS	cathepsin S preproprotein	0.64128
axo18110-f_at	0.0077	0.00331	-4.12104	-3.26991	-0.640808	RBM25	RNA binding motif protein 25	0.641354
axo10366-r_at	6.4e-05	1.21e-05	-9.50569	2.8919	-0.640456	RRP9	RNA, U3 small nucleolar interacting protein 2	0.64151
axo14930-f_at	0.000241	6.01e-05	-7.63194	1.11742	-0.640444	NCAPH	non-SMC condensin I complex, subunit H	0.641515
axo00703-r_at	2.01e-05	2.88e-06	-11.4981	4.48005	-0.639781	DCAF15	hypothetical protein LOC90379	0.64181
axo07027-r_at	0.000109	2.32e-05	-8.70341	2.17041	-0.639665	CAV2	caveolin 2 isoform a and b	0.641862
axo19881-f_at	1.52e-05	2.02e-06	-12.049	4.87581	-0.639537	C17orf37	hypothetical protein LOC84299	0.641919
axo06865-f_at	0.000104	2.18e-05	-8.7772	2.23902	-0.639354	DLGAP5	discs large homolog 7 isoform b	0.642
axo02417-f_at	0.000245	6.1e-05	-7.61484	1.09969	-0.639184	GOLM1	golgi membrane protein 1	0.642076
axo15658-f_at	0.000283	7.25e-05	-7.43338	0.909764	-0.638988	VGLL1	vestigial like 1	0.642163
axo18080-f_at	6.87e-05	1.32e-05	-9.39626	2.79657	-0.638677	RPRD1B	Regulation of nuclear pre-mRNA domain containing 1B	0.642302
axo10225-r_at	1.37e-05	1.77e-06	-12.259	5.02232	-0.638261	PET112L	PET112-like	0.642487
axo09941-f_at	0.00023	5.66e-05	-7.69497	1.18247	-0.637788	POLR2B	DNA directed RNA polymerase II polypeptide B	0.642698
axo00347-f_at	0.000128	2.83e-05	-8.46841	1.9487	-0.637707	SELM	selenoprotein M precursor	0.642734
axo20320-f_at	0.00597	0.00248	-4.33328	-2.95765	-0.637161	LMF2	lipase maturation factor 2	0.642977
axo02827-r_s_at	1.02e-05	1.2e-06	-12.8951	5.45249	-0.637017	ZNF326	zinc finger protein 326 isoform 1	0.643041
axo13164-f_at	1.36e-05	1.73e-06	-12.29	5.04378	-0.636698	OSTF1	osteoclast stimulating factor 1	0.643183
axo06018-r_at	2.99e-05	4.72e-06	-10.7741	3.93312	-0.63669	SARDH	sarcosine dehydrogenase precursor	0.643187
axo01283-f_at	0.000681	0.000205	-6.40526	-0.235844	-0.636427	OSBPL3	oxysterol-binding protein-like protein 3 isoform d	0.643304
axo08657-r_at	1.09e-05	1.31e-06	-12.7415	5.35041	-0.636382	RBMS1	RNA binding motif, single stranded interacting protein 1 isoform c	0.643324
axo07396-f_at	1.88e-05	2.63e-06	-11.6378	4.582	-0.635819	AARS	alanyl-tRNA synthetase	0.643575
axo15212-f_at	4.26e-05	7.33e-06	-10.1638	3.44622	-0.635331	ZDHHC9	zinc finger, DHHC domain containing 9	0.643793
axo18697-f_at	1e-05	1.17e-06	-12.9382	5.48091	-0.635261	NOC4L	nucleolar complex associated 4 homolog	0.643824
axo14692-f_at	3.28e-05	5.3e-06	-10.6117	3.80601	-0.635216	BAT2D1	HBxAg transactivated protein 2	0.643845
axo12173-f_at	1.4e-05	1.81e-06	-12.2169	4.99311	-0.634804	SLBP	stem-loop (histone) binding protein	0.644028
axo18682-f_at	0.00018	4.22e-05	-8.0146	1.50616	-0.634665	C17orf39	hypothetical protein LOC79018	0.644091
axo13265-r_at	1.96e-05	2.78e-06	-11.5519	4.51948	-0.634653	PDCD6	programmed cell death 6	0.644096
axo10016-f_at	1.65e-05	2.24e-06	-11.8842	4.75918	-0.634568	CREB1	cAMP responsive element binding protein 1 isoform A	0.644134
axo11353-f_at	0.00222	0.000805	-5.20848	-1.73578	-0.632037	EBI3	Epstein-Barr virus induced 3 precursor	0.645265
axo16586-r_at	5.35e-05	9.71e-06	-9.78905	3.13449	-0.631929	TMEM38B	transmembrane protein 38B	0.645313
axo13903-r_at	2.11e-05	3.06e-06	-11.4101	4.41528	-0.631833	FAF2	UBX domain containing 8	0.645356
axo06026-r_s_at	1.02e-05	1.2e-06	-12.8914	5.45005	-0.631746	KRT5	keratin 5	0.645395
axo11119-r_at	1.95e-05	2.77e-06	-11.5602	4.52554	-0.631218	SMC4	SMC4 structural maintenance of chromosomes 4-like 1	0.645631
axo07045-f_at	6.03e-05	1.12e-05	-9.60174	2.97481	-0.631148	CDC5L	CDC5-like	0.645662
axo05398-f_at	0.000238	5.91e-05	-7.64918	1.13525	-0.630914	ELF3	E74-like factor 3 (ets domain transcription factor, epithelial-specific )	0.645767
axo05368-f_at	0.00622	0.0026	-4.29874	-3.00807	-0.630632	CDC27	cell division cycle protein 27 isoform 1	0.645893
axo11294-r_at	1.63e-05	2.2e-06	-11.9157	4.78157	-0.630344	DNM1L	dynamin 1-like isoform 3	0.646022
axo02297-f_at	0.00232	0.00085	-5.16389	-1.79542	-0.630304	CCDC75	coiled-coil domain containing 75	0.64604
axo07336-r_s_at	0.000579	0.000169	-6.58837	-0.022714	-0.628977	GTF2B	general transcription factor IIB	0.646635
axo11330-f_at	0.00691	0.00293	-4.21163	-3.13591	-0.628768	RAD50	RAD50 homolog isoform 1	0.646728
axo03672-f_at	0.000123	2.68e-05	-8.53365	2.01075	-0.628473	PICK1	protein interacting with C kinase 1	0.646861
axo03846-f_at	2.83e-05	4.41e-06	-10.8735	4.01012	-0.628408	PRMT5	protein arginine methyltransferase 5 isoform b	0.64689
axo06790-f_at	0.000434	0.00012	-6.91875	0.351616	-0.628374	LSS	lanosterol synthase isoform 3	0.646905
axo00851-r_at	7.67e-05	1.51e-05	-9.2231	2.64378	-0.627666	MITD1	MIT, microtubule interacting and transport, domain containing 1	0.647223
axo01519-f_at	0.000901	0.000285	-6.10276	-0.597108	-0.627485	YTHDC1	splicing factor YT521-B isoform 1	0.647304
axo19894-r_at	2.39e-05	3.58e-06	-11.1772	4.24157	-0.626558	LSMD1	LSM domain containing 1	0.64772
axo15498-f_at	0.000707	0.000214	-6.36253	-0.286169	-0.626513	PPPDE1	PPPDE peptidase domain containing 1	0.64774
axo10708-f_at	0.00015	3.41e-05	-8.25559	1.74358	-0.626472	POLRMT	mitochondrial DNA-directed RNA polymerase precursor	0.647759
axo10970-f_at	7.28e-05	1.42e-05	-9.30453	2.71592	-0.626418	H3F3B	H3 histone, family 3B	0.647783
axo04510-f_at	0.00377	0.00147	-4.72908	-2.39177	-0.625935	SEC31A	SEC31 homolog A isoform 3	0.648
axo09843-f_at	0.000728	0.000222	-6.32959	-0.325131	-0.625566	GBF1	golgi-specific brefeldin A resistant guanine nucleotide exchange factor 1	0.648166
axo07147-f_at	1.83e-05	2.55e-06	-11.6873	4.6179	-0.625235	DHCR7	7-dehydrocholesterol reductase	0.648314
axo10303-f_at	2.13e-05	3.11e-06	-11.3824	4.39476	-0.625183	COIL	coilin	0.648337
axo18645-r_at	2.74e-05	4.24e-06	-10.9294	4.05316	-0.624923	PYCRL	pyrroline-5-carboxylate reductase-like	0.648454
axo00913-f_at	5.36e-05	9.74e-06	-9.78461	3.13074	-0.624555	TPCN2	two pore segment channel 2	0.64862
axo17431-r_at	0.000632	0.000188	-6.48715	-0.140017	-0.624517	PRDM9	PR domain containing 9	0.648637
axo17035-r_at	5.31e-05	9.63e-06	-9.79994	3.1437	-0.624483	ELAC1	elaC homolog 1	0.648652
axo02500-f_at	0.000431	0.000119	-6.92935	0.363409	-0.624335	FAM83C	hypothetical protein LOC128876	0.648719
axo09747-f_at	0.000466	0.000131	-6.83699	0.26018	-0.624009	CRY1	cryptochrome 1 (photolyase-like)	0.648865
axo15687-f_at	1.91e-05	2.68e-06	-11.6084	4.56062	-0.623727	TRAP1	TNF receptor-associated protein 1	0.648992
axo08763-f_s_at	4.14e-05	7.08e-06	-10.2113	3.48508	-0.6237	SFRS3	splicing factor, arginine/serine-rich 3	0.649004
axo06321-f_at	0.0072	0.00307	-4.17766	-3.18602	-0.622902	RCC2	regulator of chromosome condensation 2	0.649364
axo09127-f_at	1.87e-05	2.61e-06	-11.6508	4.59144	-0.622637	YWHAH	tyrosine 3-monooxygenase/tryptophan 5-monooxygenase activation protein, eta polypeptide	0.649483
axo20778-f_at	0.000191	4.55e-05	-7.93267	1.42416	-0.622631	AGFG1	HIV-1 Rev binding protein isoform 3	0.649485
axo03364-f_at	9e-05	1.84e-05	-8.97997	2.42515	-0.622112	SLC6A9	solute carrier family 6 member 9 isoform 2	0.649719
axo10621-r_at	0.000293	7.54e-05	-7.39212	0.866092	-0.621644	HDAC1	histone deacetylase 1	0.64993
axo04733-f_at	0.000987	0.000316	-6.00773	-0.713027	-0.621544	TMEM223	transmembrane protein 223	0.649975
axo20143-f_at	4.32e-05	7.47e-06	-10.137	3.42432	-0.621174	PPP1R15B	protein phosphatase 1, regulatory subunit 15B	0.650141
axo09079-r_at	3.04e-05	4.82e-06	-10.7458	3.91109	-0.620354	UBE2L3	ubiquitin-conjugating enzyme E2L 3 isoform 1	0.650511
axo16595-r_at	0.000765	0.000235	-6.27655	-0.388141	-0.62035	ARMC1	armadillo repeat-containing protein	0.650513
axo10424-f_at	0.00543	0.00223	-4.41248	-2.84268	-0.620127	COPB2	coatomer protein complex, subunit beta 2 (beta prime)	0.650614
axo15168-f_at	1.61e-05	2.18e-06	-11.9282	4.79047	-0.618877	WSB1	WD repeat and SOCS box-containing 1 isoform 1	0.651178
axo02877-f_at	1.48e-05	1.95e-06	-12.1049	4.91505	-0.618742	RNF14	ring finger protein 14 isoform 1	0.651238
axo09770-f_at	0.000378	0.000102	-7.07911	0.528706	-0.618602	STOM	stomatin isoform a	0.651302
axo16406-f_at	9.16e-05	1.88e-05	-8.95476	2.40219	-0.61839	PRPF39	PRP39 pre-mRNA processing factor 39 homolog	0.651397
axo04546-r_at	0.000974	0.000312	-6.02102	-0.696738	-0.617515	TCF19	transcription factor 19	0.651793
axo17016-f_at	0.00146	0.000497	-5.61207	-1.20846	-0.617419	ACSS2	acyl-CoA synthetase short-chain family member 2 isoform 1	0.651836
axo02555-f_at	0.000846	0.000264	-6.16922	-0.516745	-0.617362	SERINC2	tumor differentially expressed 2-like	0.651862
axo04830-f_at	0.00044	0.000122	-6.90311	0.334176	-0.617326	CUGBP2	CUG triplet repeat, RNA binding protein 2 isoform 4	0.651878
axo07941-r_at	0.000126	2.77e-05	-8.49614	1.97511	-0.617136	HPD	4-hydroxyphenylpyruvate dioxygenase	0.651964
axo14306-f_at	3.19e-05	5.12e-06	-10.6597	3.84372	-0.617108	PDCD11	programmed cell death 11	0.651976
axo03640-f_at	0.00394	0.00155	-4.68975	-2.44702	-0.617067		PREDICTED: similar to hCG30005	0.651995
axo01279-f_at	9.54e-05	1.97e-05	-8.899	2.35124	-0.616505	UCMA	upper zone of growth plate and cartilage matrix associated	0.652249
axo10514-f_at	0.000372	0.0001	-7.09782	0.549186	-0.61631	ONECUT2	one cut domain, family member 2	0.652337
axo13218-r_at	0.000102	2.14e-05	-8.79976	2.2599	-0.616246	SETDB1	SET domain, bifurcated 1 isoform 2	0.652366
axo20154-r_at	0.000125	2.75e-05	-8.50366	1.98227	-0.616134	MASTL	microtubule associated serine/threonine kinase-like	0.652417
axo10400-r_at	3.85e-05	6.47e-06	-10.3341	3.58463	-0.616107	SLC33A1	acetyl-coenzyme A transporter	0.652429
axo10280-f_at	0.000355	9.49e-05	-7.15604	0.612636	-0.615671	TTC4	tetratricopeptide repeat domain 4	0.652627
axo15466-f_at	0.00257	0.000953	-5.07156	-1.91984	-0.614954	FAHD2A	fumarylacetoacetate hydrolase domain containing 2A	0.652951
axo16515-r_at	0.000136	3.04e-05	-8.38754	1.87124	-0.614803	AGGF1	angiogenic factor VG5Q	0.653019
axo06573-r_at	0.000252	6.3e-05	-7.58015	1.06365	-0.614378	PPP1R12A	protein phosphatase 1, regulatory (inhibitor) subunit 12A isoform a	0.653211
axo05374-f_at	6.34e-05	1.19e-05	-9.52101	2.90517	-0.614179	LSM14A	LSM14 homolog A isoform a	0.653302
axo19363-f_at	0.000959	0.000306	-6.03849	-0.675378	-0.613566	SLC25A21	solute carrier family 25 (mitochondrial oxodicarboxylate carrier), member 21	0.653579
axo15917-f_at	1.4e-05	1.82e-06	-12.2093	4.98785	-0.612849	MRPS30	mitochondrial ribosomal protein S30	0.653904
axo18042-f_at	0.00335	0.00129	-4.83213	-2.24803	-0.612067	COTL1	coactosin-like 1	0.654259
axo04688-f_at	0.000161	3.71e-05	-8.15868	1.64878	-0.612057	SLC38A8	solute carrier family 38, member 8	0.654263
axo15728-f_at	2.45e-05	3.68e-06	-11.1346	4.20941	-0.612012	SRRM2	splicing coactivator subunit SRm300	0.654284
axo19915-f_at	2.08e-05	3e-06	-11.4382	4.43597	-0.610964	ARF1	ADP-ribosylation factor 1	0.654759
axo18053-r_at	2.04e-05	2.94e-06	-11.4694	4.459	-0.610777	LSM2	LSM2 homolog, U6 small nuclear RNA associated	0.654844
axo10091-r_at	0.000696	0.00021	-6.3811	-0.264263	-0.610484	ETFDH	electron-transferring-flavoprotein dehydrogenase precursor	0.654977
axo16148-r_at	1.6e-05	2.16e-06	-11.9405	4.7992	-0.610276	OTUB1	otubain 1	0.655071
axo03242-r_at	0.000127	2.79e-05	-8.48611	1.96557	-0.610181	KRT18	keratin 18	0.655115
axo12862-f_at	0.000121	2.62e-05	-8.55939	2.03512	-0.609837	KIF22	kinesin family member 22	0.655271
axo09599-f_at	0.000372	0.0001	-7.09957	0.551096	-0.609578	FCGBP	Fc fragment of IgG binding protein	0.655388
axo13633-f_s_at	4.97e-05	8.86e-06	-9.90936	3.23569	-0.609136	GCAT	glycine C-acetyltransferase precursor	0.655589
axo17099-f_s_at	1.58e-05	2.13e-06	-11.9645	4.81616	-0.60895	UBB	ubiquitin B precursor	0.655674
axo20064-f_at	0.000477	0.000134	-6.80985	0.229651	-0.608862	CNDP1	carnosinase 1	0.655714
axo17388-f_at	0.00289	0.00109	-4.96616	-2.06331	-0.607551	GOSR2	golgi SNAP receptor complex member 2 isoform C	0.65631
axo08230-r_at	0.000677	0.000203	-6.41221	-0.227676	-0.606992	MYBL2	MYB-related protein B	0.656564
axo18649-f_at	2.06e-05	2.97e-06	-11.4521	4.44623	-0.606866	ADRB2	adrenergic, beta-2-, receptor, surface	0.656622
axo17576-f_at	5.58e-05	1.02e-05	-9.71955	3.07556	-0.606366	PAIP2B	poly(A) binding protein interacting protein 2B	0.656849
axo05021-f_at	0.00541	0.00222	-4.41645	-2.83695	-0.606316	BTBD9	BTB (POZ) domain containing 9 isoform a	0.656872
axo12531-f_at	1.95e-05	2.77e-06	-11.5574	4.5235	-0.605887	ZFP36L2	zinc finger protein 36, C3H type-like 2	0.657067
axo07266-f_at	0.0007	0.000212	-6.37294	-0.273891	-0.605696	EXTL3	exostoses-like 3	0.657154
axo01991-r_at	2.69e-05	4.14e-06	-10.9615	4.07782	-0.605616	CAMK2D	calcium/calmodulin-dependent protein kinase II delta isoform 2	0.657191
axo12153-f_at	0.00339	0.0013	-4.822	-2.26209	-0.605515	RELB	reticuloendotheliosis viral oncogene homolog B	0.657237
axo08892-f_at	1.96e-05	2.79e-06	-11.5469	4.51582	-0.605436	STIM1	stromal interaction molecule 1 precursor	0.657273
axo13027-f_at	0.00113	0.000371	-5.86517	-0.889129	-0.605047	MGEA5	meningioma expressed antigen 5 (hyaluronidase) isoform a	0.65745
axo06310-f_at	9.42e-05	1.94e-05	-8.91433	2.36528	-0.604482	TNPO2	transportin 2 (importin 3, karyopherin beta 2b) isoform 3	0.657707
axo03740-f_at	0.000291	7.48e-05	-7.40079	0.875277	-0.604472		PREDICTED: hypothetical protein	0.657712
axo03660-f_at	0.000395	0.000108	-7.02833	0.47295	-0.604346	LOC653884	PREDICTED: hypothetical protein, partial	0.65777
axo07368-f_at	5.68e-05	1.04e-05	-9.69402	3.05381	-0.604273	IGSF3	immunoglobulin superfamily, member 3 isoform 1	0.657803
axo18026-f_at	0.00469	0.00189	-4.53815	-2.66204	-0.60374	RNASEL	ribonuclease L	0.658046
axo15624-r_at	0.000297	7.67e-05	-7.37466	0.847548	-0.603435	CHAC2	ChaC, cation transport regulator-like 2	0.658185
axo09187-f_at	0.0012	0.000398	-5.80403	-0.965481	-0.603391	CUL5	Vasopressin-activated calcium-mobilizing receptor-1	0.658205
axo01192-r_at	3.15e-05	5.03e-06	-10.6859	3.86433	-0.603169	UPRT	uracil phosphoribosyltransferase (FUR1) homolog	0.658306
axo21296-f_at	0.00175	0.000614	-5.43204	-1.44091	-0.602577	PVRL4	poliovirus receptor-related 4	0.658576
axo04656-f_at	0.00541	0.00222	-4.41647	-2.83692	-0.602335	KIAA0368	KIAA0368 protein	0.658687
axo17092-r_at	5.92e-05	1.1e-05	-9.6304	2.99942	-0.60208	CYCS	cytochrome c	0.658803
axo00430-f_at	0.00124	0.00041	-5.77782	-0.998361	-0.601965	STK35	serine/threonine kinase 35	0.658856
axo05782-f_at	1.83e-05	2.54e-06	-11.692	4.62125	-0.601645	CLK3	CDC-like kinase 3 isoform a	0.659002
axo14425-f_at	0.00184	0.000649	-5.38623	-1.50076	-0.601359	PDS5B	PDS5, regulator of cohesion maintenance, homolog B	0.659133
axo19445-r_at	0.000165	3.82e-05	-8.12571	1.61631	-0.60049	TPM1	tropomyosin 1 alpha chain isoform 6	0.65953
axo15929-f_at	0.000345	9.15e-05	-7.19263	0.652319	-0.600455	CRK	v-crk sarcoma virus CT10 oncogene homolog isoform a	0.659546
axo12754-r_at	0.000112	2.39e-05	-8.66518	2.13468	-0.600373	STRAP	serine/threonine kinase receptor associated protein	0.659583
axo11265-r_at	0.00139	0.000468	-5.66347	-1.14292	-0.600212	SLC35A2	solute carrier family 35, member A2 isoform a	0.659657
axo11919-f_at	0.00466	0.00187	-4.54331	-2.65466	-0.600202	TFDP2	transcription factor Dp-2 (E2F dimerization partner 2)	0.659661
axo13709-f_at	0.00241	0.000884	-5.13257	-1.83749	-0.599205	SACS	sacsin	0.660117
axo10535-f_at	5.89e-05	1.09e-05	-9.63867	3.0065	-0.598988	TBPL1	TBP-like 1	0.660217
axo17846-r_at	0.000277	7.05e-05	-7.46171	0.939641	-0.598794	MPST	mercaptopyruvate sulfurtransferase isoform 2	0.660306
axo16320-r_at	0.00121	0.000401	-5.79688	-0.974444	-0.598708	TRNAU1AP	tRNA selenocysteine associated protein 1	0.660345
axo16983-f_at	0.000199	4.76e-05	-7.88284	1.37397	-0.598481	ZMAT1	zinc finger, matrin type 1 isoform 1	0.660449
axo01726-f_at	2.27e-05	3.36e-06	-11.2697	4.31097	-0.598459	C17orf103	transcript expressed during hematopoiesis 2	0.660459
axo02022-f_at	8.35e-05	1.68e-05	-9.09123	2.5258	-0.598376	ELF1	E74-like factor 1 (ets domain transcription factor) isoform a	0.660497
axo07482-r_at	1.48e-05	1.95e-06	-12.1043	4.91462	-0.598295	RHOA	ras homolog gene family, member A	0.660534
axo12954-r_at	6.08e-05	1.13e-05	-9.58966	2.96442	-0.598163	BACE2	beta-site APP-cleaving enzyme 2 isoform A preproprotein	0.660595
axo02563-r_at	0.000419	0.000115	-6.96205	0.399722	-0.597697	SCYL3	SCY1-like 3 isoform 2	0.660808
axo20278-f_at	0.00946	0.00419	-3.95361	-3.52038	-0.597658	FAM40A	hypothetical protein LOC85369	0.660826
axo08165-f_at	0.00191	0.000681	-5.3459	-1.5537	-0.597449	MEIS1	Meis homeobox 1	0.660922
axo19797-f_at	0.000184	4.34e-05	-7.98422	1.47583	-0.597353	CHD6	chromodomain helicase DNA binding protein 6	0.660965
axo08720-r_at	0.000132	2.94e-05	-8.42368	1.90593	-0.597105	SAFB	scaffold attachment factor B	0.661079
axo19221-f_at	0.000151	3.43e-05	-8.24881	1.73698	-0.596501	C13orf18	hypothetical protein LOC80183	0.661356
axo07599-f_at	0.000117	2.51e-05	-8.61009	2.08295	-0.596194	GSR	glutathione reductase	0.661497
axo03113-f_at	8.73e-05	1.78e-05	-9.0238	2.46492	-0.595783	FAM89A	family with sequence similarity 89, member A	0.661685
axo13024-r_s_at	5.9e-05	1.09e-05	-9.63673	3.00484	-0.59561	HNRNPH3	heterogeneous nuclear ribonucleoprotein H3 isoform a	0.661765
axo15477-f_at	1.42e-05	1.86e-06	-12.1812	4.96834	-0.595318	TMBIM4	transmembrane BAX inhibitor motif containing 4	0.661899
axo18828-r_at	0.000426	0.000117	-6.94246	0.377978	-0.595256	C6orf211	hypothetical protein LOC79624	0.661927
axo14871-f_at	0.00104	0.000335	-5.9563	-0.776246	-0.594903	HAUS5	HAUS augmin-like complex, subunit 5	0.662089
axo03408-f_at	3.53e-05	5.79e-06	-10.4866	3.70687	-0.594476	RCAN1	calcipressin 1 isoform c	0.662285
axo20777-f_at	5.11e-05	9.15e-06	-9.86719	3.20034	-0.594355	HNRNPC	heterogeneous nuclear ribonucleoprotein C isoform b	0.662341
axo09384-r_at	4.4e-05	7.65e-06	-10.105	3.39798	-0.594342	KHSRP	KH-type splicing regulatory protein (FUSE binding protein 2)	0.662346
axo14355-f_at	2.81e-05	4.36e-06	-10.8892	4.02224	-0.593905	SPEN	spen homolog, transcriptional regulator	0.662547
axo06449-f_at	0.251	0.18	-1.46776	-7.32233	-0.593627	LUZP1	leucine zipper protein 1	0.662675
axo08033-f_at	7.93e-05	1.57e-05	-9.17326	2.59936	-0.593469	KIFC1	kinesin family member C1	0.662748
axo05296-f_at	2.28e-05	3.38e-06	-11.261	4.30441	-0.59338	FLNA	filamin A, alpha isoform 2	0.662788
axo12509-f_at	0.00353	0.00137	-4.78635	-2.3117	-0.593334	TLK2	tousled-like kinase 2 isoform A	0.66281
axo19463-r_at	0.000492	0.000139	-6.77346	0.188589	-0.593333	TMEM163	transmembrane protein 163	0.66281
axo01702-r_at	0.000634	0.000188	-6.48361	-0.144141	-0.593195	WTAP	Wilms' tumour 1-associating protein isoform 2	0.662873
axo16195-f_at	0.000146	3.31e-05	-8.29051	1.77752	-0.593187	PAQR5	progestin and adipoQ receptor family member V	0.662877
axo10116-f_at	0.00042	0.000115	-6.95977	0.397188	-0.593024	GALNT2	polypeptide N-acetylgalactosaminyltransferase 2	0.662952
axo09762-f_at	0.000187	4.41e-05	-7.96806	1.45966	-0.592989	EFNB2	ephrin B2	0.662968
axo21204-f_s_at	5.49e-05	1e-05	-9.74565	3.09773	-0.592759	HNRNPH2	heterogeneous nuclear ribonucleoprotein H2	0.663074
axo20982-f_s_at	3.8e-05	6.35e-06	-10.3587	3.60449	-0.592147	NONO	non-POU domain containing, octamer-binding isoform 1	0.663355
axo14989-r_at	9.28e-05	1.91e-05	-8.93548	2.38461	-0.592072	DCAF12	WD repeat domain 40A	0.663389
axo13930-f_at	8.08e-05	1.61e-05	-9.14345	2.57269	-0.591704	MTFR1	mitochondrial fission regulator 1 isoform 1	0.663559
axo21526-f_at	0.000372	0.0001	-7.09815	0.549547	-0.591164	C2orf82	hypothetical protein LOC389084	0.663807
axo09539-f_at	0.000206	4.97e-05	-7.83603	1.32658	-0.590816	MATN4	matrilin 4 isoform 1 precursor	0.663967
axo16165-r_at	0.000927	0.000294	-6.0742	-0.631828	-0.590735	GIN1	zinc finger, H2C2 domain containing	0.664004
axo10298-f_at	6.81e-05	1.3e-05	-9.40935	2.80802	-0.590607	CDK2AP1	CDK2-associated protein 1	0.664063
axo11939-r_at	1.44e-05	1.89e-06	-12.1535	4.94898	-0.590033	AIMP2	JTV1	0.664328
axo15259-r_at	3.25e-05	5.25e-06	-10.6246	3.81614	-0.590021	RRP7A	ribosomal RNA processing 7 homolog A	0.664333
axo08428-f_at	0.000152	3.46e-05	-8.23879	1.72721	-0.589983	2018-09-05	septin 5	0.664351
axo03029-f_at	2.2e-05	3.23e-06	-11.3257	4.3527	-0.589907	WDR86	WD repeat domain 86	0.664386
axo02709-f_at	0.0992	0.0614	-2.17265	-6.3085	-0.589841	RPGR	retinitis pigmentosa GTPase regulator isoform C	0.664416
axo03436-f_at	1.46e-05	1.92e-06	-12.1242	4.92851	-0.589774	NCKAP1	NCK-associated protein 1 isoform 2	0.664447
axo18371-f_at	0.000124	2.71e-05	-8.51855	1.99642	-0.589714	NCAPG	chromosome condensation protein G	0.664475
axo09176-f_at	4.01e-05	6.78e-06	-10.269	3.53196	-0.589341	CHIT1	chitotriosidase	0.664646
axo09345-f_at	0.00134	0.000452	-5.69438	-1.10366	-0.589293	IFITM1	interferon induced transmembrane protein 1 (9-27)	0.664669
axo00197-r_at	9.1e-05	1.86e-05	-8.96501	2.41154	-0.589036	GBP4	guanylate binding protein 4	0.664787
axo05318-f_at	0.000199	4.78e-05	-7.87835	1.36942	-0.588646	SCIN	scinderin isoform 1	0.664966
axo05765-r_at	0.000119	2.58e-05	-8.57618	2.05099	-0.588507	SYTL4	synaptotagmin-like 4	0.665031
axo07934-r_s_at	0.000125	2.74e-05	-8.50755	1.98597	-0.588483	HNRNPK	heterogeneous nuclear ribonucleoprotein K isoform a	0.665042
axo19372-f_at	0.000825	0.000257	-6.19576	-0.484803	-0.587866	JHDM1D	jumonji C domain containing histone demethylase 1 homolog D	0.665326
axo02008-f_at	0.000103	2.15e-05	-8.7914	2.25217	-0.587613	WDR51B	WD repeat domain 51B	0.665443
axo11008-f_at	0.00102	0.000329	-5.97228	-0.756562	-0.586929	SMAD4	mothers against decapentaplegic homolog 4	0.665758
axo09529-f_at	0.000639	0.00019	-6.47424	-0.155071	-0.586816	FADD	Fas-associated via death domain	0.665811
axo18661-f_at	7.58e-05	1.49e-05	-9.2411	2.65977	-0.586596	RASL11B	RAS-like family 11 member B	0.665912
axo17020-r_at	0.00176	0.000619	-5.42593	-1.44887	-0.586565	MLL5	myeloid/lymphoid or mixed-lineage leukemia 5	0.665927
axo01870-r_at	0.000118	2.54e-05	-8.59666	2.0703	-0.586334	LCORL	ligand dependent nuclear receptor corepressor-like	0.666033
axo08542-r_at	2.27e-05	3.34e-06	-11.276	4.31562	-0.586175	PSMD8	proteasome 26S non-ATPase subunit 8	0.666107
axo19890-f_s_at	7.4e-05	1.45e-05	-9.27897	2.69333	-0.585759	MRPL45	mitochondrial ribosomal protein L45	0.666299
axo08414-r_at	0.00165	0.000574	-5.48966	-1.36602	-0.585541	PLAUR	plasminogen activator, urokinase receptor isoform 1 precursor	0.666399
axo00983-f_at	0.000128	2.83e-05	-8.4681	1.9484	-0.58524	CNOT6L	CCR4-NOT transcription complex, subunit 6-like	0.666539
axo07965-f_at	0.000518	0.000148	-6.71483	0.122105	-0.584706	ID1	inhibitor of DNA binding 1 isoform a	0.666785
axo13847-f_at	0.000105	2.22e-05	-8.75523	2.21865	-0.584593	TFCP2L1	LBP-9	0.666837
axo21541-f_s_at	4.15e-05	7.09e-06	-10.208	3.48236	-0.584324	SF1	splicing factor 1 isoform 1	0.666962
axo19220-f_s_at	0.0013	0.000435	-5.72667	-1.0628	-0.584262	ZXDC	ZXD family zinc finger C isoform 1	0.66699
axo01848-f_at	0.000172	4.01e-05	-8.0719	1.56312	-0.584135	SPINT1	serine peptidase inhibitor, Kunitz type 1 isoform 2 precursor	0.667049
axo02757-f_at	0.00154	0.000531	-5.55526	-1.28133	-0.583824	BAZ1A	bromodomain adjacent to zinc finger domain, 1A isoform b	0.667193
axo05199-f_at	3.08e-05	4.89e-06	-10.7236	3.8938	-0.583323	IMPDH1	inosine monophosphate dehydrogenase 1 isoform c	0.667425
axo08085-r_at	1.65e-05	2.24e-06	-11.8874	4.76143	-0.582968	LGALS3	galectin 3	0.667589
axo09966-f_at	6.3e-05	1.18e-05	-9.53429	2.91667	-0.58279	BUB1	budding uninhibited by benzimidazoles 1	0.667671
axo07090-f_at	2.04e-05	2.93e-06	-11.4735	4.46197	-0.58265	CLPTM1	cleft lip and palate associated transmembrane protein 1	0.667736
axo03227-f_at	0.00242	0.000888	-5.12847	-1.84301	-0.582504	MDFIC	MyoD family inhibitor domain containing protein isoform p40	0.667804
axo14670-f_at	0.000129	2.85e-05	-8.46173	1.94232	-0.582495	PMPCA	peptidase (mitochondrial processing) alpha	0.667808
axo19809-r_at	2.57e-05	3.92e-06	-11.0425	4.13959	-0.582418	FAR1	fatty acyl CoA reductase 1	0.667843
axo17406-f_at	0.000131	2.9e-05	-8.43904	1.92064	-0.581637	GRP	gastrin-releasing peptide isoform 3 preproprotein	0.668205
axo03848-f_at	0.00114	0.000374	-5.8592	-0.896568	-0.581283	LRRC68	PREDICTED: similar to hCG22147	0.668369
axo19785-f_at	3.94e-05	6.63e-06	-10.3003	3.55734	-0.58097	ARID5B	AT rich interactive domain 5B (MRF1-like)	0.668514
axo19651-f_at	0.000348	9.26e-05	-7.18035	0.63902	-0.58024	ESYT3	family with sequence similarity 62 (C2 domain containing), member C	0.668852
axo02699-f_at	0.000702	0.000213	-6.37003	-0.277326	-0.579788	USP12	ubiquitin-specific protease 12-like 1	0.669062
axo20688-f_at	0.00022	5.36e-05	-7.75381	1.24283	-0.579645	HSP90B1	heat shock protein 90kDa beta, member 1	0.669128
axo21114-f_s_at	1.92e-05	2.71e-06	-11.5927	4.54921	-0.579494	TRIM4	tripartite motif protein TRIM4 isoform alpha	0.669198
axo20107-f_at	4.64e-05	8.14e-06	-10.0217	3.32919	-0.579176	AIFM2	apoptosis-inducing factor (AIF)-like mitchondrion-associated inducer of death	0.669346
axo06892-f_at	0.000852	0.000266	-6.16237	-0.524998	-0.579169	GSK3B	glycogen synthase kinase 3 beta isoform 2	0.669349
axo16708-f_at	5.04e-05	9e-06	-9.88889	3.21854	-0.578814	EDEM2	ER degradation enhancer, mannosidase alpha-like 2 isoform 1	0.669514
axo20908-f_at	0.000221	5.41e-05	-7.74451	1.23331	-0.578475	LGALS4	galectin-4	0.669672
axo00366-f_at	6.18e-05	1.15e-05	-9.5659	2.94396	-0.57841	ZSWIM1	zinc finger, SWIM-type containing 1	0.669701
axo03219-f_at	0.000626	0.000185	-6.49906	-0.126145	-0.577897	NSUN4	NOL1/NOP2/Sun domain family 4 protein	0.669939
axo16801-f_at	0.00016	3.69e-05	-8.16608	1.65604	-0.577829	SAPS3	SAPS domain family, member 3	0.669971
axo15946-r_at	0.000779	0.00024	-6.25677	-0.411733	-0.577592	RWDD2B	RWD domain containing 2B	0.670081
axo11003-r_at	1.98e-05	2.82e-06	-11.5323	4.50513	-0.577553	JUND	jun D proto-oncogene	0.670099
axo19602-f_at	0.0362	0.0192	-2.9199	-5.13047	-0.577413	SESN2	sestrin 2	0.670165
axo17852-f_at	0.000129	2.86e-05	-8.45826	1.93901	-0.576932	KIAA1524	p90 autoantigen	0.670388
axo03614-f_at	9.41e-05	1.94e-05	-8.91619	2.36698	-0.576871	KREMEN1	kringle-containing transmembrane protein 1 isoform 3 precursor	0.670416
axo11982-f_at	6.13e-05	1.14e-05	-9.57722	2.95371	-0.576823	TIMM17A	translocase of inner mitochondrial membrane 17 homolog A	0.670439
axo18143-f_at	0.000169	3.93e-05	-8.0963	1.58727	-0.576781	ALOXE3	arachidonate lipoxygenase 3	0.670458
axo02735-r_at	0.00236	0.000866	-5.14913	-1.81524	-0.576604	SORBS1	sorbin and SH3 domain containing 1 isoform 7	0.67054
axo15290-r_at	2.53e-05	3.84e-06	-11.0729	4.16273	-0.576398	UBXN1	UBX domain protein 1	0.670636
axo17243-f_at	2.5e-05	3.79e-06	-11.0918	4.17705	-0.576124	PAF1	Paf1, RNA polymerase II associated factor, homolog	0.670763
axo17102-f_s_at	4.08e-05	6.94e-06	-10.2381	3.50685	-0.575951	UBB	ubiquitin B precursor	0.670844
axo13245-f_at	0.000101	2.11e-05	-8.81591	2.27482	-0.575309	TNPO3	transportin 3	0.671142
axo11858-r_at	0.00151	0.000518	-5.57587	-1.25484	-0.574567	PPP2R5D	delta isoform of regulatory subunit B56, protein phosphatase 2A isoform 1	0.671488
axo04451-f_at	0.0001	2.09e-05	-8.8267	2.28478	-0.574492	ALAS2	5-aminolevulinate synthase 2 isoform a precursor	0.671523
axo11637-f_at	0.000701	0.000212	-6.37244	-0.274478	-0.574257	EXO1	exonuclease 1 isoform b	0.671632
axo16773-r_at	0.000749	0.00023	-6.29921	-0.361177	-0.573814	ARHGAP12	Rho GTPase activating protein 12	0.671838
axo12036-f_at	0.000181	4.25e-05	-8.00713	1.49871	-0.573189	USP16	ubiquitin specific protease 16 isoform b	0.672129
axo05077-r_at	7.89e-05	1.56e-05	-9.18014	2.60549	-0.573127	C7orf25	hypothetical protein LOC79020 a	0.672158
axo16239-r_at	0.000113	2.42e-05	-8.65244	2.12274	-0.572741	NCAPG2	leucine zipper protein 5	0.672338
axo12473-f_at	0.00455	0.00183	-4.56275	-2.62692	-0.572481	CLP1	ATP/GTP-binding protein isoform 1	0.672459
axo08512-f_at	0.000179	4.21e-05	-8.01901	1.51056	-0.572405	PSMA5	proteasome alpha 5 subunit	0.672495
axo03909-f_at	0.00191	0.000679	-5.3486	-1.55014	-0.572304	LOC100128274	PREDICTED: hypothetical protein	0.672542
axo09488-f_at	8.47e-05	1.71e-05	-9.06797	2.50484	-0.572294	B4GALT3	UDP-Gal:betaGlcNAc beta 1,4- galactosyltransferase 3	0.672547
axo03643-r_at	0.000161	3.72e-05	-8.15547	1.64562	-0.571995	TXNRD3	PREDICTED: similar to TXNRD3 protein	0.672686
axo01595-r_at	2.37e-05	3.55e-06	-11.1892	4.25057	-0.571912	RNF168	ring finger protein 168	0.672725
axo11295-f_at	2.2e-05	3.23e-06	-11.3298	4.35574	-0.571695	DNM1L	dynamin 1-like isoform 3	0.672826
axo03024-f_at	0.0156	0.00741	-3.55547	-4.12934	-0.571523	MPZL3	myelin protein zero-like 3	0.672906
axo09283-f_at	7.88e-05	1.56e-05	-9.18216	2.6073	-0.57103	CUL1	cullin 1	0.673136
axo05148-r_at	8.95e-05	1.83e-05	-8.98936	2.43368	-0.570442	MED7	mediator complex subunit 7	0.67341
axo04468-f_at	0.00436	0.00174	-4.60141	-2.57192	-0.570291	CLTA	clathrin, light polypeptide A isoform c	0.673481
axo19744-r_at	0.000525	0.00015	-6.6997	0.104877	-0.570032	KBTBD7	kelch repeat and BTB (POZ) domain containing 7	0.673602
axo09623-r_at	2.2e-05	3.23e-06	-11.3291	4.35523	-0.569991	CPNE3	copine III	0.673621
axo05568-f_at	0.000518	0.000148	-6.71411	0.121283	-0.568883	ZNF84	zinc finger protein 84	0.674139
axo11428-f_at	7.36e-05	1.44e-05	-9.28758	2.70095	-0.568576	SLC35B1	solute carrier family 35, member B1	0.674282
axo02903-f_at	0.000928	0.000294	-6.07254	-0.633851	-0.568182	ISCA2	iron-sulfur cluster assembly 2	0.674466
axo16930-r_at	3.05e-05	4.85e-06	-10.7377	3.90478	-0.567886	EAPP	E2F-associated phosphoprotein	0.674604
axo13676-f_at	0.000258	6.49e-05	-7.5499	1.03212	-0.567849	PISD	phosphatidylserine decarboxylase	0.674622
axo15150-f_at	2.52e-05	3.82e-06	-11.0802	4.1683	-0.567412	POLDIP2	DNA polymerase delta interacting protein 2	0.674826
axo09651-r_at	9.75e-05	2.02e-05	-8.86515	2.32018	-0.567049	FUBP3	far upstream element (FUSE) binding protein 3	0.674996
axo15268-f_at	0.000109	2.32e-05	-8.70111	2.16826	-0.566478	G0S2	G0/G1switch 2	0.675263
axo12898-f_at	0.000503	0.000143	-6.74809	0.159868	-0.56643	MTF2	metal response element binding transcription factor 2	0.675286
axo18688-r_at	8.76e-05	1.78e-05	-9.01908	2.46065	-0.565798	PDCL3	phosducin-like 3	0.675581
axo04603-f_at	0.00529	0.00216	-4.43587	-2.8089	-0.565228	INSR	insulin receptor isoform Short precursor	0.675848
axo10350-f_at	7.86e-05	1.56e-05	-9.18522	2.61004	-0.564875	ATP6V0D1	ATPase, H+ transporting, lysosomal, V0 subunit d1	0.676014
axo14617-f_at	0.00012	2.61e-05	-8.56359	2.03909	-0.564841	WDR43	WD repeat domain 43	0.67603
axo00708-f_at	0.000125	2.74e-05	-8.50735	1.98578	-0.564699	C19orf52	hypothetical protein LOC90580	0.676096
axo13879-f_at	0.00195	0.000696	-5.32839	-1.57675	-0.564698	DNTTIP2	deoxynucleotidyltransferase, terminal, interacting protein 2	0.676097
axo07353-f_at	0.00271	0.00101	-5.02565	-1.98213	-0.564604	HIF1A	hypoxia-inducible factor 1, alpha subunit isoform 1	0.676141
axo14701-f_at	0.000352	9.39e-05	-7.16604	0.623499	-0.56431		Rho-related BTB domain containing 2	0.676279
axo18234-f_at	2.33e-05	3.47e-06	-11.2229	4.27587	-0.564089	GMPPB	GDP-mannose pyrophosphorylase B isoform 2	0.676382
axo18467-f_at	2.58e-05	3.94e-06	-11.0355	4.13431	-0.563901	DUSP6	dual specificity phosphatase 6 isoform b	0.67647
axo13825-r_at	0.000189	4.49e-05	-7.94815	1.43971	-0.563595	UBE2S	ubiquitin-conjugating enzyme E2S	0.676614
axo04255-r_at	0.00138	0.000467	-5.66562	-1.14018	-0.56352	MLH1	MutL protein homolog 1	0.676649
axo07374-r_at	0.000227	5.6e-05	-7.70749	1.19533	-0.563308	IGFBP7	insulin-like growth factor binding protein 7	0.676749
axo10858-f_at	0.0001	2.1e-05	-8.82394	2.28223	-0.562483	ATP2A3	ATPase, Ca++ transporting, ubiquitous isoform a	0.677136
axo05430-f_at	3.32e-05	5.4e-06	-10.5855	3.78533	-0.562325	ADFP	adipose differentiation-related protein	0.67721
axo18945-f_at	0.000455	0.000127	-6.86232	0.288585	-0.562234	ANKHD1	ankyrin repeat and KH domain containing 1 isoform 3	0.677253
axo04429-f_at	0.00329	0.00126	-4.84887	-2.22481	-0.562211	RCC1	regulator of chromosome condensation 1 isoform b	0.677264
axo12578-f_at	0.00944	0.00417	-3.95548	-3.51756	-0.562148	TAF5	TBP-associated factor 5	0.677293
axo09886-f_at	2.99e-05	4.71e-06	-10.7773	3.93567	-0.562133	RAB9A	RAB9A, member RAS oncogene family	0.6773
axo11393-f_at	2.73e-05	4.22e-06	-10.9339	4.05662	-0.562002		THO complex 4	0.677361
axo18981-f_at	0.000202	4.85e-05	-7.8638	1.35471	-0.561728	ELMO3	engulfment and cell motility 3	0.67749
axo09801-f_at	0.1	0.0623	-2.16392	-6.32193	-0.561193	MYO9B	myosin IXB isoform 1	0.677742
axo19229-f_at	0.00214	0.000772	-5.24311	-1.68964	-0.560598	MUS81	MUS81 endonuclease homolog	0.678021
axo09632-r_at	0.00336	0.00129	-4.82875	-2.25271	-0.56012	TIMELESS	timeless homolog	0.678246
axo14727-r_at	2.14e-05	3.12e-06	-11.378	4.39147	-0.559906	DNAJC9	DnaJ homolog, subfamily C, member 9	0.678346
axo09690-f_at	0.000642	0.000191	-6.46972	-0.160341	-0.559902	UBE2M	ubiquitin-conjugating enzyme E2M	0.678348
axo13226-f_at	3.66e-05	6.05e-06	-10.4254	3.65798	-0.559816	STAT5B	signal transducer and activator of transcription 5B	0.678389
axo06448-f_at	0.000347	9.23e-05	-7.18404	0.643012	-0.559391	SLC35B3	solute carrier family 35, member B3	0.678589
axo10570-r_at	6.03e-05	1.12e-05	-9.60254	2.9755	-0.559337	PDIA4	protein disulfide isomerase-associated 4	0.678614
axo10800-r_at	6.21e-05	1.16e-05	-9.55853	2.93761	-0.559335	HS3ST1	heparan sulfate D-glucosaminyl 3-O-sulfotransferase 1 precursor	0.678615
[truncated: 12,959 more rows]
